# Supplementary material
Source: PubMed Central journal article supplement (PMC4824049)
Supplement: NIHMS730300-supplement.pdf [file NIHMS730300-supplement.pdf]

# Synthesis and biochemical evaluation of benzoylbenzophenone thiosemicarbazone analogues as potent and selective inhibitors of cathepsin L

Erica N. Parker<sup>a</sup>, Jiangli Song<sup>a</sup>, G. D. Kishore Kumar<sup>a</sup>, Samuel O. Odutola<sup>b</sup>, Gustavo E. Chavarria<sup>a</sup>, Amanda K. Charlton-Sevcik<sup>a</sup>, Tracy E. Strecker<sup>a</sup>, Ashleigh L. Barnes<sup>a</sup>, Dhivya R. Sudhan<sup>c</sup>, Thomas R. Wittenborn<sup>e</sup>, Dietmar W. Siemann<sup>c,d</sup>, Michael R. Horsman<sup>e</sup>, David J. Chaplin<sup>f</sup>, Mary Lynn Trawick<sup>a,b,\*</sup>, Kevin G. Pinney<sup>a,b,\*</sup>

<sup>a</sup>Department of Chemistry and Biochemistry Baylor University One Bear Place #97348 Waco, TX 76798-7348

<sup>b</sup>Institute of Biomedical Studies Baylor University One Bear Place #97224 Waco, TX 76798-7224

<sup>c</sup>Department of Radiation Oncology, University of Florida Health Cancer Center, Gainesville, FL 32610

<sup>d</sup>Department of Pharmacology and Therapeutics, College of Medicine, University of Florida, Gainesville, FL 32610

<sup>e</sup>Department of Experimental Clinical Oncology, Aarhus University Hospital, Aarhus, Denmark

<sup>f</sup>OXiGENE, Inc. 701 Gateway Blvd, Suite 210 South San Francisco, CA 94080

\*Co-corresponding Authors: Tel: 254-710-4117, E-mail: [Kevin\\_Pinney@baylor.edu](mailto:Kevin_Pinney@baylor.edu); Tel: 254-710-6857, E-mail: [Mary\\_Lynn\\_Trawick@baylor.edu](mailto:Mary_Lynn_Trawick@baylor.edu)

## **Table of Contents**

|                                                                                                                                       |          |
|---------------------------------------------------------------------------------------------------------------------------------------|----------|
| Figure S1. Overview of cysteine cathepsin in invasion and metastasis.                                                                 | S4       |
| Supplemental Table 1. Inhibitory Activity of Benzoylbenzophenone Thiosemicarbazones Against Cathepsins L and B                        | S5       |
| Reversibility studies of cathepsin L inhibition with analogues <b>1</b> and <b>32</b>                                                 | S6-S7    |
| Molecular docking studies with active analogues <b>1</b> , <b>32</b> , and inactive analogue <b>14</b>                                | S8-S12   |
| Lipinski rule of five analysis of benzoylbenzophenone thiosemicarbazones                                                              | S13-S14  |
| <sup>1</sup> H, <sup>13</sup> C NMR spectra, HPLC traces, and HRMS spectra for Compound <b>1</b>                                      | S15-S20  |
| <sup>1</sup> H, <sup>13</sup> C NMR spectra, HPLC traces, and HRMS spectra for Compound <b>2</b>                                      | S21-S26  |
| <sup>1</sup> H, <sup>13</sup> C NMR spectra and HRMS spectra for Compound <b>3</b>                                                    | S27-S29  |
| <sup>1</sup> H, <sup>13</sup> C NMR spectra, HPLC traces, and HRMS spectra for Compound <b>4</b>                                      | S30-S35  |
| <sup>1</sup> H, <sup>13</sup> C, <sup>19</sup> F NMR spectra and HRMS spectra for Compound <b>5</b>                                   | S36-S39  |
| <sup>1</sup> H, <sup>13</sup> C NMR spectra and HRMS spectra for Compound <b>6</b>                                                    | S40-S42  |
| <sup>1</sup> H, <sup>13</sup> C NMR spectra and HRMS spectra for Compound <b>7</b>                                                    | S43-S45  |
| <sup>1</sup> H, <sup>13</sup> C, <sup>19</sup> F, DEPT, HETCOR, HMBC NMR spectra, HPLC traces, and HRMS spectra for Compound <b>8</b> | S46-S57  |
| <sup>1</sup> H, <sup>13</sup> C NMR spectra, HPLC traces, and HRMS spectra for Compound <b>9</b>                                      | S58-S63  |
| <sup>1</sup> H, <sup>13</sup> C NMR spectra, HPLC traces, and HRMS spectra for Compound <b>10</b>                                     | S64-S69  |
| <sup>1</sup> H, <sup>13</sup> C NMR spectra, HPLC traces, and HRMS spectra for Compound <b>11</b>                                     | S70-S75  |
| <sup>1</sup> H, <sup>13</sup> C NMR spectra and HRMS spectra for Compound <b>12</b>                                                   | S76-S78  |
| <sup>1</sup> H, <sup>13</sup> C NMR spectra, HPLC traces, and HRMS spectra for Compound <b>13</b>                                     | S79-S84  |
| <sup>1</sup> H, <sup>13</sup> C NMR spectra and HRMS spectra for intermediate to Compound <b>14</b>                                   | S85-S87  |
| <sup>1</sup> H, <sup>13</sup> C NMR spectra, HPLC traces, and HRMS spectra for Compound <b>14</b>                                     | S88-S93  |
| <sup>1</sup> H NMR spectra and HRMS spectra for intermediate to Compound <b>15</b>                                                    | S94-S96  |
| <sup>1</sup> H, <sup>13</sup> C NMR spectra spectra for Compound <b>15</b>                                                            | S97-S98  |
| <sup>1</sup> H, <sup>13</sup> C NMR spectra and HRMS spectra for Compound <b>16</b>                                                   | S99-S101 |

|                                                                                                                                 |           |
|---------------------------------------------------------------------------------------------------------------------------------|-----------|
| <sup>1</sup> H, <sup>13</sup> C NMR spectra and HRMS spectra for Compound <b>17</b>                                             | S102-S104 |
| <sup>1</sup> H, <sup>13</sup> C NMR spectra and HRMS spectra for Compound <b>18</b>                                             | S105-S107 |
| <sup>1</sup> H, <sup>13</sup> C NMR spectra and HRMS spectra for Compound <b>19</b>                                             | S108-S110 |
| <sup>1</sup> H, <sup>13</sup> C NMR spectra, HPLC traces, and HRMS spectra for Compound <b>20</b>                               | S111-S116 |
| <sup>1</sup> H, <sup>13</sup> C NMR spectra and HRMS spectra for Compound <b>21</b>                                             | S117-S119 |
| <sup>1</sup> H, <sup>13</sup> C NMR spectra, HPLC traces, and HRMS spectra for Compound <b>22</b>                               | S120-S125 |
| <sup>1</sup> H, <sup>13</sup> C NMR spectra and HRMS spectra for Compound <b>23</b>                                             | S126-S128 |
| <sup>1</sup> H, <sup>13</sup> C, <sup>19</sup> F NMR spectra and HRMS spectra for Compound <b>24</b>                            | S129-S132 |
| <sup>1</sup> H, <sup>13</sup> C NMR spectra and HRMS spectra for Compound <b>25</b>                                             | S133-S135 |
| <sup>1</sup> H, <sup>13</sup> C NMR spectra and HRMS spectra for Compound <b>26</b>                                             | S136-S138 |
| <sup>1</sup> H, <sup>13</sup> C NMR spectra and HRMS spectra for Compound <b>27</b>                                             | S139-S141 |
| <sup>1</sup> H, <sup>13</sup> C, <sup>19</sup> F NMR spectra and HRMS spectra for Compound <b>28</b>                            | S142-S145 |
| <sup>1</sup> H, <sup>13</sup> C NMR spectra and HRMS spectra for Compound <b>29</b>                                             | S146-148  |
| <sup>1</sup> H, <sup>13</sup> C NMR spectra and HRMS spectra for Compound <b>30</b>                                             | S149-S151 |
| <sup>1</sup> H, <sup>13</sup> C NMR spectra, HPLC traces, and HRMS spectra for Compound <b>31</b>                               | S152-S157 |
| <sup>1</sup> H, <sup>13</sup> C, <sup>19</sup> F, COSY, NOESY NMR spectra, HPLC traces, and HRMS spectra for Compound <b>32</b> | S158-S168 |
| <sup>1</sup> H, <sup>13</sup> C NMR spectra, HPLC traces, and HRMS spectra for Compound <b>33</b>                               | S169-S176 |
| X-Ray Crystallographic Data for Compound <b>2</b>                                                                               | S177-184  |
| X-Ray Crystallographic Data for Compound <b>10</b>                                                                              | S185-S191 |
| X-Ray Crystallographic Data for Compound <b>33</b>                                                                              | S192-S198 |

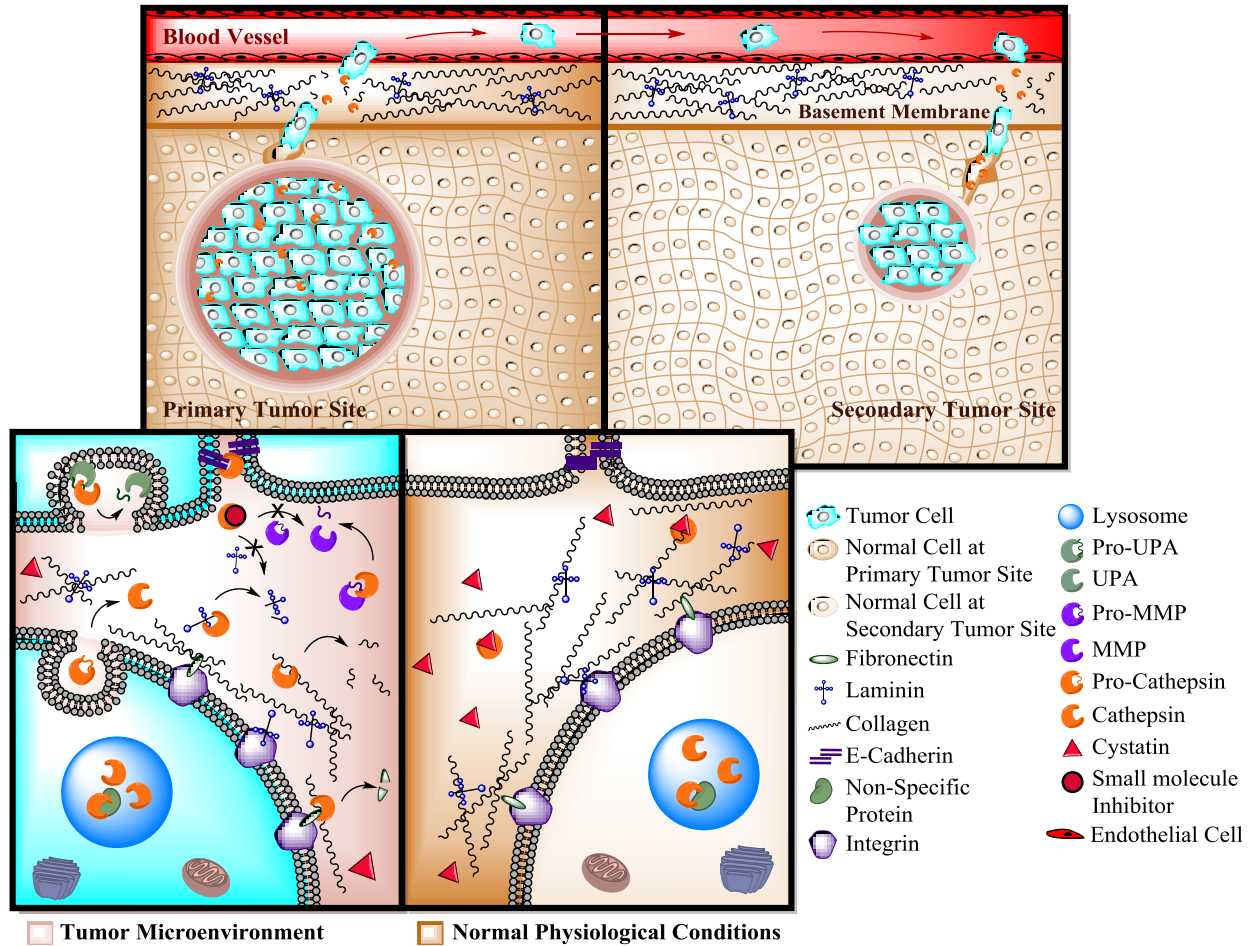

**Table 1. Inhibitory Activity of Benzoylbenzophenone Thiosemicarbazones Against Cathepsins L and B**

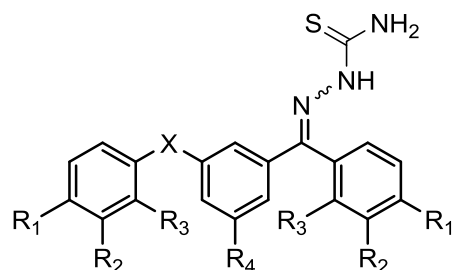

| Compd                            | R <sub>1</sub>                     | R <sub>2</sub>  | R <sub>3</sub> | R <sub>4</sub> | X                        | IC <sub>50</sub> Values (nM) ± S.E. |        |
|----------------------------------|------------------------------------|-----------------|----------------|----------------|--------------------------|-------------------------------------|--------|
|                                  |                                    |                 |                |                |                          | Cat L                               | Cat B  |
| <b>1</b>                         | H                                  | H               | H              | H              | C=O                      | 9.85±0.60                           | >10000 |
| <b>2</b>                         | H                                  | H               | H              | Bz             | C=O                      | 56.0±19.5                           | >10000 |
| <b>4</b>                         | H                                  | H               | H              | H              | CH(OH)                   | 23.80±0.78                          | >10000 |
| <b>8</b>                         | F                                  | H               | H              | H              | C=O                      | 14.4±4.5                            | >10000 |
| <b>9</b>                         | Br                                 | H               | H              | H              | C=O                      | 1522±325                            | >10000 |
| <b>10</b>                        | Br                                 | H               | H              | H              | C=NNHC(S)NH <sub>2</sub> | >10000                              | >10000 |
| <b>11</b>                        | OCH <sub>3</sub>                   | H               | H              | H              | C=O                      | 5117±600                            | >10000 |
| <b>13</b>                        | OH                                 | H               | H              | H              | C=O                      | 340.5±30                            | >10000 |
| <b>14</b>                        | OCH(CH <sub>3</sub> ) <sub>2</sub> | H               | H              | H              | C=O                      | >10000                              | >10000 |
| <b>20</b>                        | H                                  | CH <sub>3</sub> | H              | H              | C=O                      | 654±162                             | >10000 |
| <b>22</b>                        | H                                  | Br              | H              | OH             | C=O                      | ~10000 <sup>a</sup>                 | >10000 |
| <b>31</b>                        | H                                  | OH              | H              | Br             | C=O                      | 71.6±6.8                            | >10000 |
| <b>32</b>                        | H                                  | H               | F              | Br             | C=O                      | 8.12±0.5                            | >10000 |
| <b>33</b>                        | H                                  | Br              | H              | Br             | C=O                      | 10347±1864                          | >10000 |
| <b>Ethyl Acetate<sup>b</sup></b> | -                                  | -               | -              | -              | -                        | >>10000                             | ND     |

<sup>a</sup>Compound **22** inhibited cathepsin L activity by 56.9% at 10000 nM.

<sup>b</sup>Ethyl Acetate inhibited cathepsin L activity by 10% at a concentration of 5 % by volume (0.5 M).

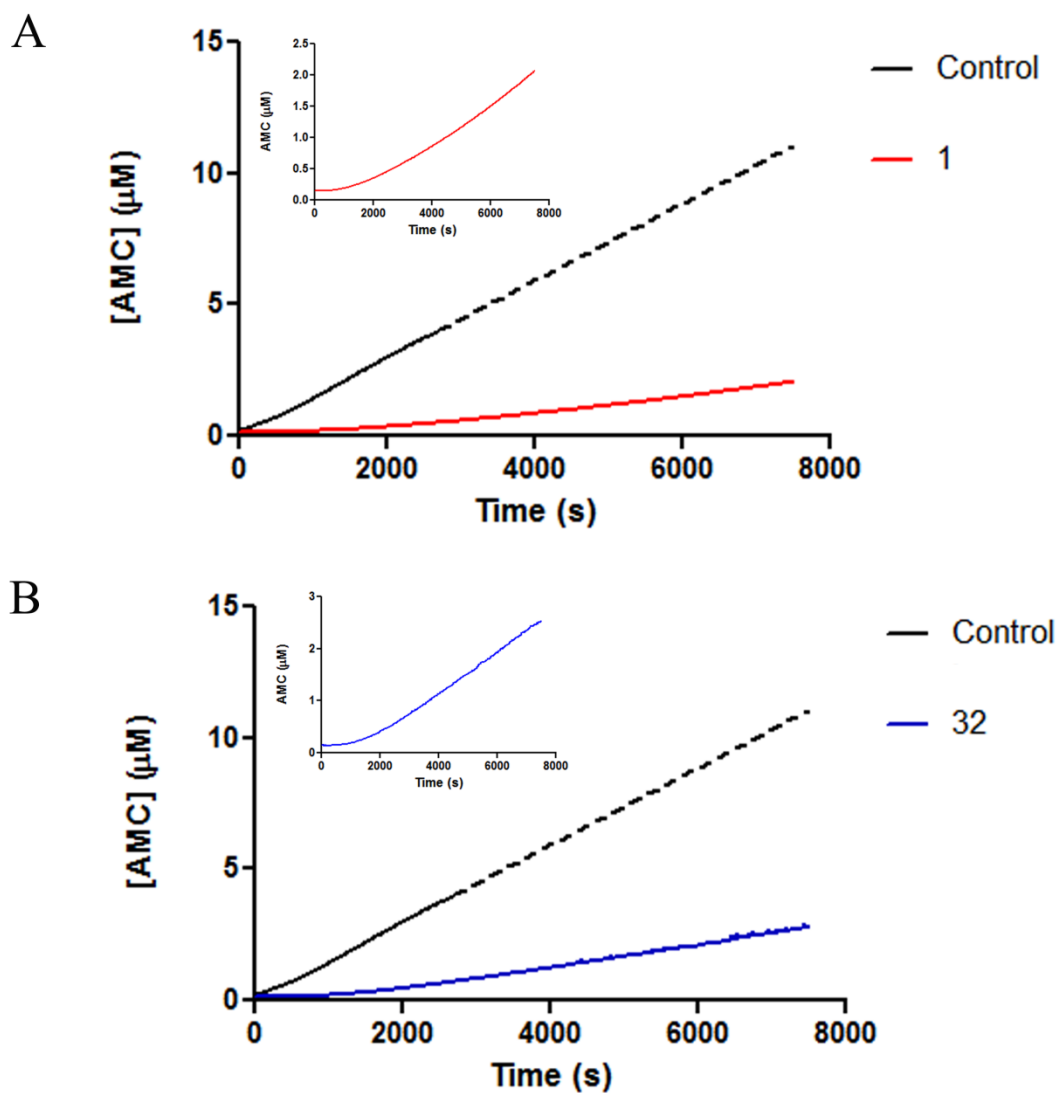

**Figure S2.** Reversibility studies of cathepsin L inhibition with analogues **1** and **32**. Inhibition of cathepsin L with analogues **1** (A) and **32** (B) was found to be reversible. Inhibitors (5  $\mu\text{M}$ ) were pre-incubated at 25  $^{\circ}\text{C}$  with 100 nM cathepsin L for 3 h, and then diluted 100 fold with 10  $\mu\text{M}$  Z-FR-AMC substrate. Enzyme activity was monitored by determining the release of the fluorescent product AMC as a function of time for the untreated enzyme reaction (Control) and the reactions of enzyme that had been pre-treated with inhibitors. The results for each inhibitor demonstrate a slow recovery of enzyme activity (increasing reaction rates) as a function of time. The insets for each graph show an expanded view.

#### Reversibility Studies:

Compounds **1** and **32** were investigated to determine if these time dependent inhibitors were reversible inhibitors of cathepsin L. Pre-incubation of 100 nM of cathepsin L with either 5

$\mu\text{M}$  compound **1** or  $5 \mu\text{M}$  compound **32** was followed by a 100 fold dilution of the enzyme-inhibitor solution with substrate to give a final reaction concentration of  $50 \text{ nM}$  inhibitor and  $1 \text{ nM}$  cathepsin L in  $10 \mu\text{M}$  substrate. Observation of the reaction rate as a function of time showed complete inhibition of enzyme activity by both compounds for approximately the first  $1000 \text{ s}$ . This was followed by a slow increase in enzyme reaction rate as a function of time (Figure S2). Cathepsin L activity for the uninhibited reaction was found to be  $1.47 \text{ nM/s}$ , compared to  $0.26 \text{ nM/s}$  and  $0.38 \text{ nM/s}$  at  $7500 \text{ s}$  for compounds **1** and **32** respectively (the rates were still increasing at  $7500 \text{ s}$ ). These results indicate that cathepsin L showed a slow recovery of enzyme activity.

### **Experimental Section:**

The pre-incubation buffer contained  $100 \text{ mM}$  NaOAc, pH 5.5,  $1 \text{ mM}$  EDTA,  $3 \text{ mM}$  DTT,  $2\%$  DMSO, and  $0.01\%$  Brij 35. A  $100 \mu\text{M}$  solution of Z-FR-AMC was also prepared. Cathepsin L was pre-incubated with an equal amount of a  $10 \mu\text{M}$  solution of inhibitor to make an enzyme-inhibitor pre-incubation solution with  $100 \text{ nM}$  cathepsin L and  $5 \mu\text{M}$  inhibitor which was incubated at  $25 \text{ }^\circ\text{C}$  for  $3 \text{ h}$ . Control enzyme solution was also incubated under the same conditions. Each reaction was initiated by addition of  $2 \mu\text{l}$  of enzyme-inhibitor solution to  $178 \mu\text{l}$  of assay buffer and  $20 \mu\text{l}$  of Z-FR-AMC solution to make up a  $200 \mu\text{l}$  total reaction solution per well in a 96 well Corning 3686 assay microplate. The final reaction conditions were:  $100 \text{ mM}$  NaOAc, pH 5.5,  $1 \text{ mM}$  EDTA,  $3 \text{ mM}$  DTT,  $0.2\%$  DMSO,  $0.01\%$  Brij 35,  $1 \text{ nM}$  cathepsin L,  $50 \text{ nM}$  inhibitor and  $10 \mu\text{M}$  of Z-FR-AMC. The reaction was monitored fluorometrically at  $15 \text{ second}$  intervals for  $7500 \text{ seconds}$  with a Thermo Fluoroskan Ascent FL microplate reader. Data analysis was performed with Graphpad Prism 5.0 software.

## Molecular modeling:

For docking studies, the 1.45 Å resolution crystal structure 2XU1 (PDB) was used.<sup>S1</sup> For this crystal structure the enzyme was obtained from recombinant human cathepsin L with Thr110 of the mature enzyme mutated to an alanine residue (T223A in CatL1\_human.sw) that had been pre-incubated with a 2 mM solution of the covalent inhibitor, (4R)-1-[[1-(4-chlorophenyl)cyclopropyl]carbonyl]-4-[(2-chlorophenyl)sulfonyl]-N-(1-cyanocyclopropyl)-L-prolinamide, prior to crystallization. 2XU1 was imported into Discovery Studio (Accelrys) 4.1 and water molecules and the ligand were then removed. The Prepare Protein function was used to check the amino acid sequence, correct for missing atoms, and protonate the protein. Individual ligands for docking were imported from ChemDraw molefiles and protonated. The binding site on the enzyme was defined from the PDB data in the Define and Edit Binding Site mode. The CDOCKER program in Receptor-Ligand Interactions which uses a CHARMM based molecular dynamics scheme was used to dock ligands into the binding/active site of cathepsin L. In this program, random ligand conformations are generated using high-temperature molecular dynamics, and in fact we observed both *E* and *Z* isomers of individual ligands in the results. The ligand conformations generated are then translated into the binding site for creation of poses using random rigid-body rotations followed by simulated annealing. The ligand poses are refined by an additional minimization. The results (10-20) for each ligand were ranked by interaction energies, and the poses with the most favorable interaction energies were examined for orientation, H-bonding, non-polar interactions and distance from the Cys25 thiolate. To validate this protocol, KGP94, which had been docked into cathepsin L and characterized,<sup>S2</sup> was docked and its top pose confirmed as very close to the conformation reported previously.

S1. Hardegger, L. A., Kuhn, B., Spinnler, B., Anselm, L., Ecabert, R., Stihle, M., Gsell, B., Thoma, R., Diez, J., Benz, J., Plancher, J.-M., Hartmann, G., Banner, D. W., Haap, W. and Diederich, F. Systematic Investigation of Halogen Bonding in Protein–Ligand Interactions. *Angew. Chem. Int. Ed.* **2011**, *50*, 314–318. doi: 10.1002/anie.201006781

S2. Chavarria, G. E.; Horsman, M. R.; Arispe, W. M.; Kishore Kumar, G. D; Chen, S.-E.; Strecker, T. E.; Parker, E. N.; Chaplin, D. J.; Pinney, K.G.; Trawick, M.L. Initial evaluation of the antitumor activity of KGP94, a functionalized benzophenone thiosemicarbazone inhibitor of cathepsin L. *Eur. J. Med. Chem.* **2012**, *58*, 568-572.



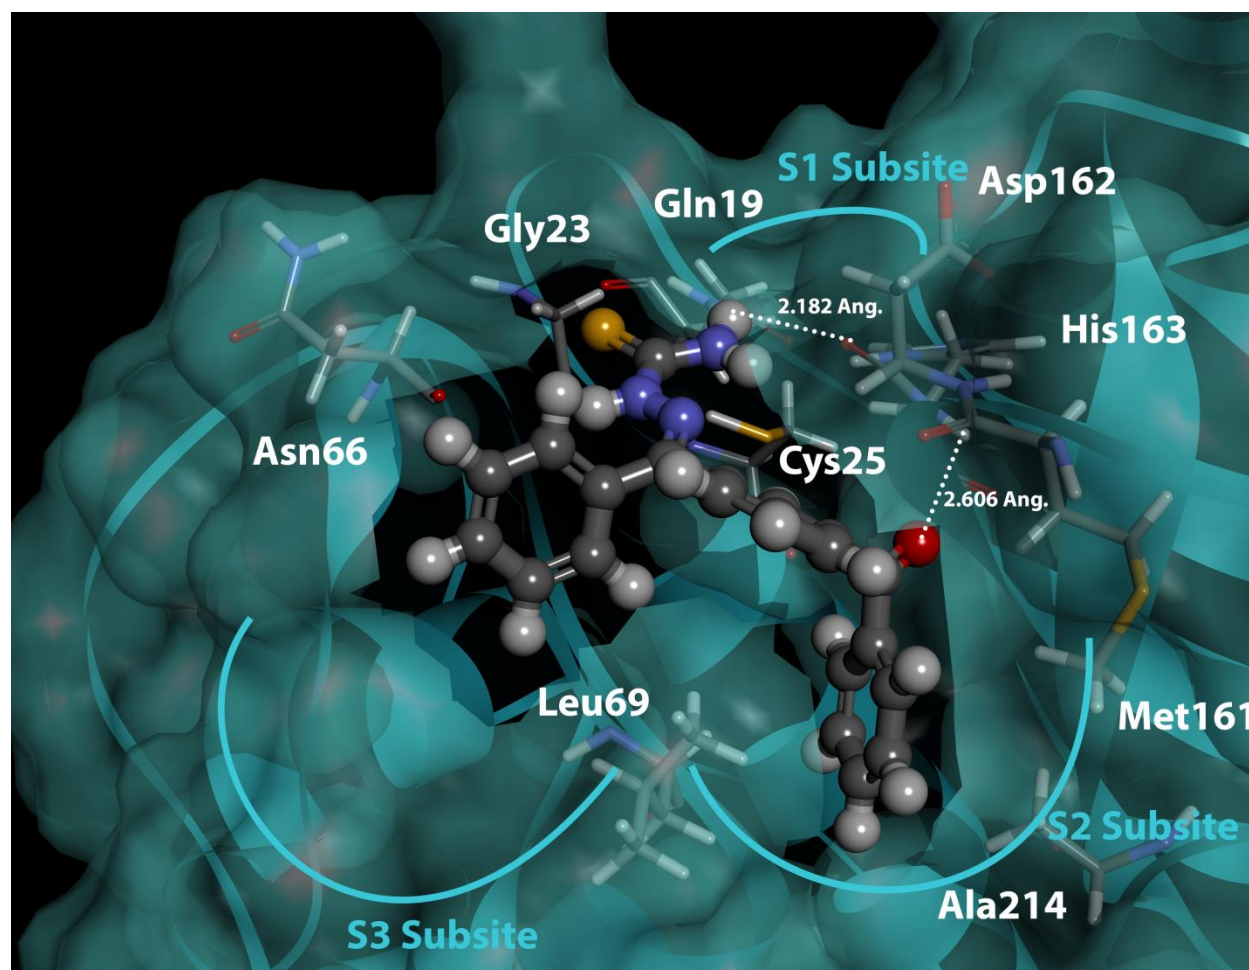

**Figure S3.** Molecular docking of analogue **1** within the active site of cathepsin L. Same as Figure 6A in corresponding article except the binding subsites of cathepsin L are labeled and hydrogen bonding between cathepsin L and the inhibitor are shown. Analogue **1** is shown in ball and stick mode (C, gray; H, white; O, red; N, blue; S, yellow). Cathepsin L is shown in ribbon mode with a transparent molecular surface (Green) and enzyme active site amino acid residues are labeled and shown in stick mode (C, gray; H, white; O, red; N, blue; S, yellow).

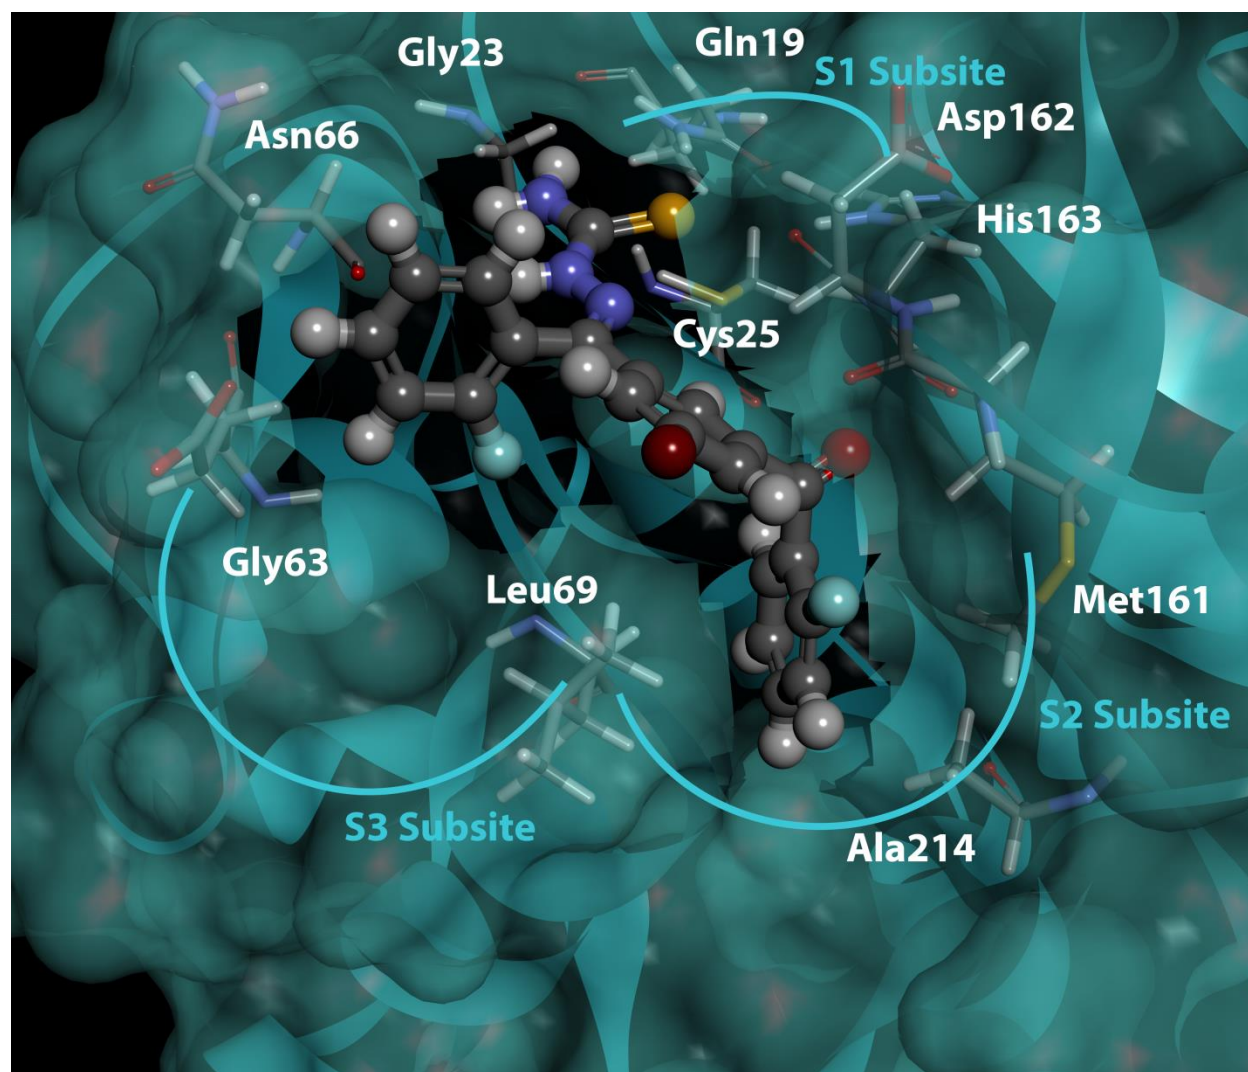

**Figure S4.** Molecular docking of analogue **32** within the active site of cathepsin L. Same as Figure 6B in corresponding article except the binding subsites of cathepsin L are labeled. Analogue **32** is shown in ball and stick mode (C, gray; H, white; O, red; N, blue; S, yellow; F, light blue; Br, brown). Cathepsin L is shown in ribbon mode with a transparent molecular surface (Green) and enzyme active site amino acid residues are labeled and shown in stick mode (C, gray; H, white; O, red; N, blue; S, yellow).

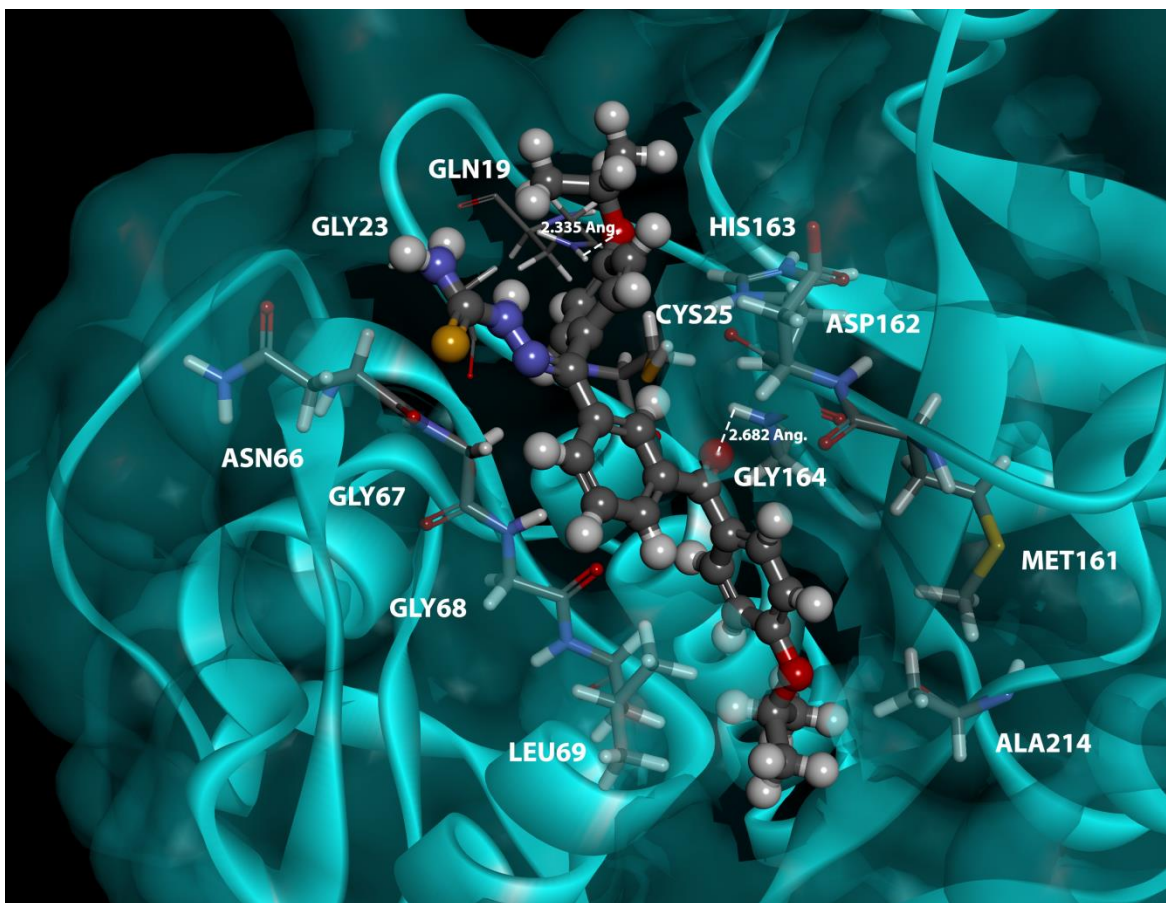

**Figure S5.** Molecular docking of analogue **14** within the active site of cathepsin L. Analogue **14** is shown in ball and stick mode (C, gray; H, white; O, red; N, blue; S, yellow). Cathepsin L is shown in ribbon mode with a transparent molecular surface (Green) and enzyme active site amino acid residues are labeled and shown in stick mode (C, gray; H, white; O, red; N, blue; S, yellow).

Figure S5 shows the most favorable binding orientation for analogue **14** (inactive against cathepsin L) as determined by interaction energy. The *p*-isopropoxy analogue **14** did not bind in the active site of cathepsin L in a manner that would facilitate formation of a covalent bond. In each of the top binding orientations, the thiocarbonyl carbon atom of analogue **14** was not in close proximity (separated by 7.9 Å in the pose shown in Figure S5) to the Cys25 thiolate ion of cathepsin L. Multiple nonpolar interactions and two hydrogen bonds one between the carbonyl oxygen of analogue **14** and the NH backbone of Gly164 and another between the *p*-isopropoxy oxygen atom of analogue **14** and the sidechain NH of Gln19 were observed for the top binding orientation. Interestingly, the benzophenone portion resides in the S2 pocket of cathepsin L in a similar fashion to that observed for active cathepsin L inhibitors **1** and **32**. However, the remaining outermost ring resides in the S1 subsite instead of being oriented towards the S3 subsite and the thiosemicarbazone moiety is oriented towards the solvent instead of residing in the S1 subsite. Active cathepsin L inhibitors **1** and **32** bind in a manner that facilitates formation of a transient covalent bond between the enzyme and inhibitor. This comparison emphasizes that formation of a transient covalent bond is necessary for activity against cathepsin L in this series of compounds.



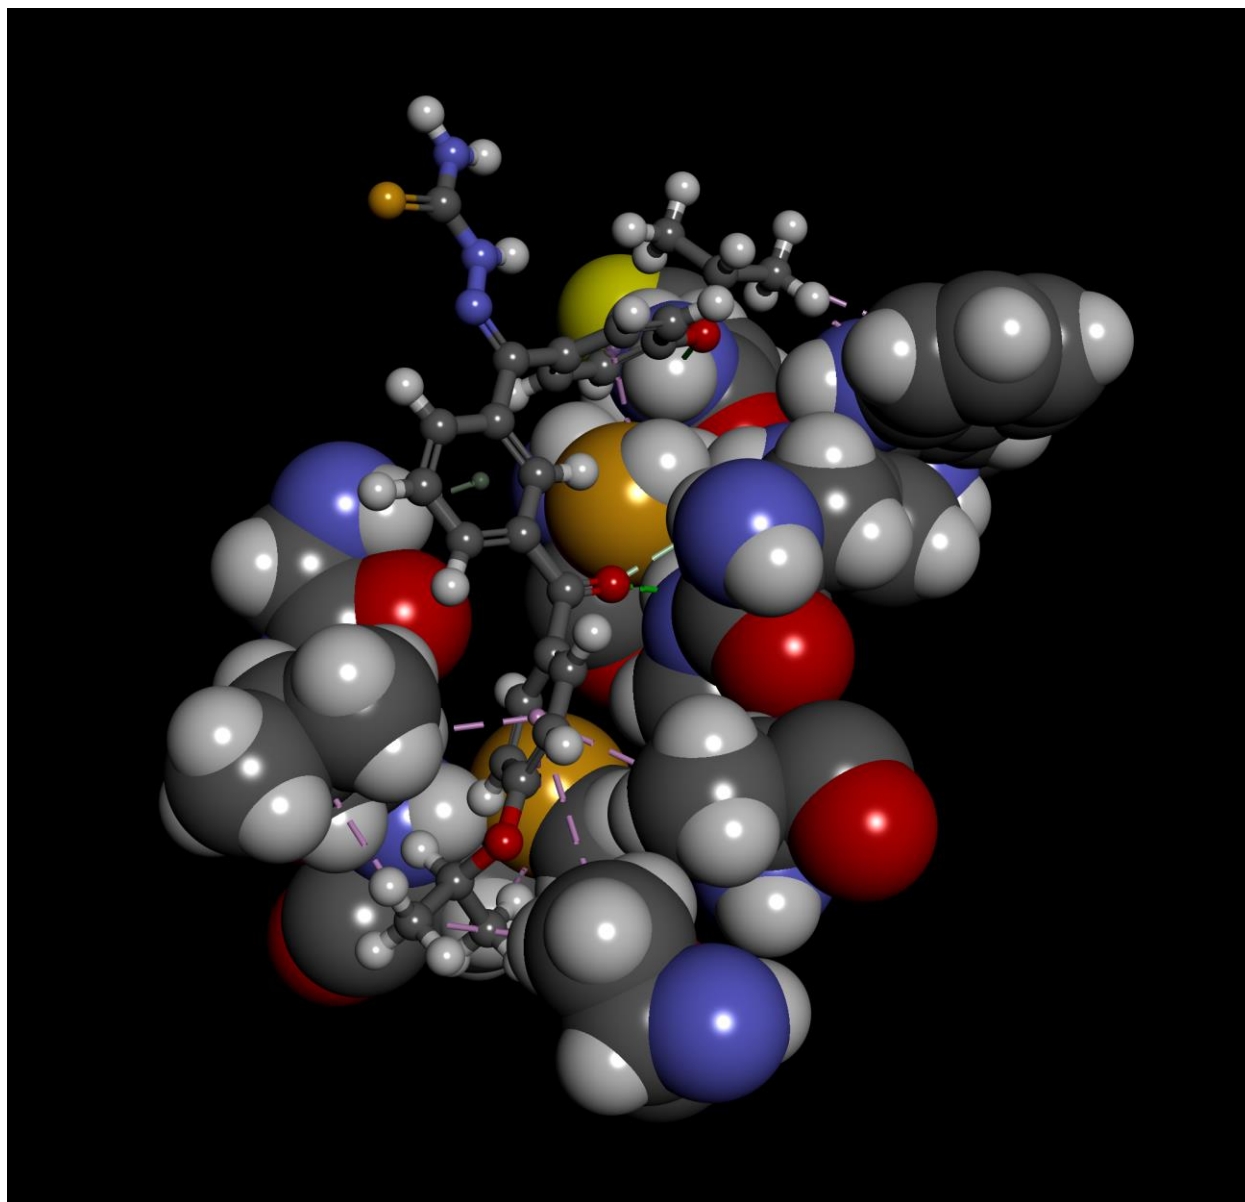

**Figure S6.** Molecular docking of analogue **14** with cathepsin L showing interactions with active site amino acid residues. Analogue **14** is shown in ball and stick mode and amino acid residues of cathepsin L are shown in CPK mode (C, gray; H, white; O, red; N, blue; S, yellow). This view shows the close interactions between compound **14** and the amino acid residues of cathepsin L. The thiosemicarbazone moiety of compound **14** is oriented towards solvent.

## Lipinski Rule of Five Analysis of Benzoylbenzophenone Thiosemicarbazones

- Meets all requirements
- Meets all but one requirement

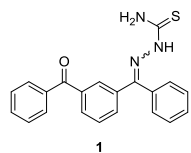

Chemical Formula: C<sub>21</sub>H<sub>17</sub>N<sub>3</sub>OS  
 Molecular Weight: 359.44700  
 CLogP: 4.426  
 H-Bond donors: 3  
 H-Bond acceptors: 5

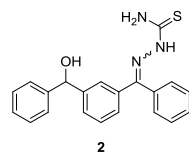

Chemical Formula: C<sub>21</sub>H<sub>19</sub>N<sub>3</sub>OS  
 Molecular Weight: 361.46300  
 CLogP: 3.41  
 H-Bond donors: 4  
 H-Bond acceptors: 5

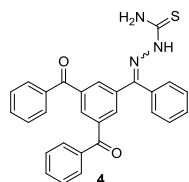

Chemical Formula: C<sub>28</sub>H<sub>21</sub>N<sub>3</sub>O<sub>2</sub>S  
 Molecular Weight: 463.55500  
 CLogP: 5.527  
 H-Bond donors: 3  
 H-Bond acceptors: 6

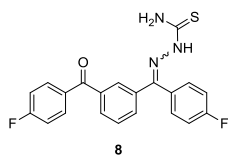

Chemical Formula: C<sub>21</sub>H<sub>15</sub>F<sub>2</sub>N<sub>3</sub>OS  
 Molecular Weight: 395.42781  
 CLogP: 4.76786  
 H-Bond donors: 3  
 H-Bond acceptors: 5

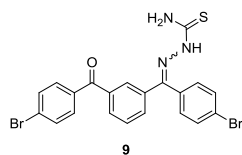

Chemical Formula: C<sub>21</sub>H<sub>15</sub>Br<sub>2</sub>N<sub>3</sub>OS  
 Molecular Weight: 517.23900  
 CLogP: 6.20786  
 H-Bond donors: 3  
 H-Bond acceptors: 5

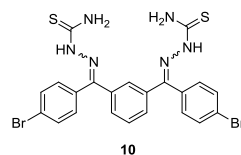

Chemical Formula: C<sub>22</sub>H<sub>16</sub>Br<sub>2</sub>N<sub>6</sub>S<sub>2</sub>  
 Molecular Weight: 590.35600  
 CLogP: 6.1428  
 H-Bond donors: 6  
 H-Bond acceptors: 8

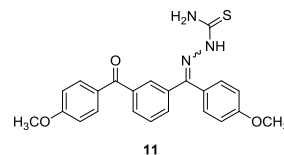

Chemical Formula: C<sub>23</sub>H<sub>21</sub>N<sub>3</sub>O<sub>3</sub>S  
 Molecular Weight: 419.49900  
 CLogP: 4.60131  
 H-Bond donors: 3  
 H-Bond acceptors: 7

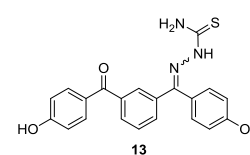

Chemical Formula: C<sub>21</sub>H<sub>17</sub>N<sub>3</sub>O<sub>3</sub>S  
 Molecular Weight: 391.44500  
 CLogP: 3.961  
 H-Bond donors: 5  
 H-Bond acceptors: 7

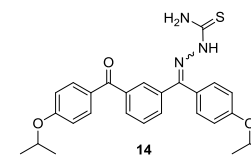

Chemical Formula: C<sub>27</sub>H<sub>29</sub>N<sub>3</sub>O<sub>3</sub>S  
 Molecular Weight: 475.60700  
 CLogP: 6.27731  
 H-Bond donors: 3  
 H-Bond acceptors: 7

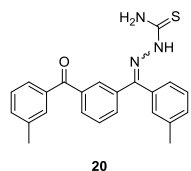

Chemical Formula: C<sub>23</sub>H<sub>21</sub>N<sub>3</sub>OS  
 Molecular Weight: 387.50100  
 CLogP: 5.424  
 H-Bond donors: 3  
 H-Bond acceptors: 5

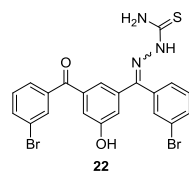

Chemical Formula: C<sub>21</sub>H<sub>15</sub>Br<sub>2</sub>N<sub>3</sub>O<sub>2</sub>S  
 Molecular Weight: 533.23800  
 CLogP: 6.06536  
 H-Bond donors: 4  
 H-Bond acceptors: 6

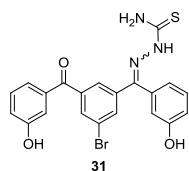

Chemical Formula: C<sub>21</sub>H<sub>16</sub>BrN<sub>3</sub>O<sub>3</sub>S  
 Molecular Weight: 470.34100  
 CLogP: 4.86134  
 H-Bond donors: 5  
 H-Bond acceptors: 7

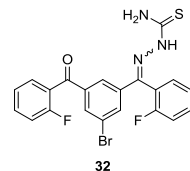

Chemical Formula: C<sub>21</sub>H<sub>14</sub>BrF<sub>2</sub>N<sub>3</sub>O<sub>3</sub>S  
 Molecular Weight: 474.32381  
 CLogP: 5.19393  
 H-Bond donors: 3  
 H-Bond acceptors: 5

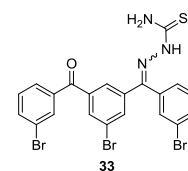

Chemical Formula: C<sub>21</sub>H<sub>14</sub>Br<sub>3</sub>N<sub>3</sub>OS  
 Molecular Weight: 596.13500  
 CLogP: 7.08393  
 H-Bond donors: 3  
 H-Bond acceptors: 5

**Figure S7.** Lipinski rule of five analysis for benzoylbenzophenone thiosemicarbazones.

The Lipinski rule of five was used as a preliminary analysis for predicting pharmacokinetic properties of benzoylbenzophenone thiosemicarbazone analogues. The Lipinski rule of five<sup>S3</sup> predicts the likelihood of whether or not a particular molecular entity will exhibit suitable solubility and permeability properties which are applicable to predicting oral bioavailability. CLogP, chemical formula, and molecular weight were calculated using ChemBioDraw Ultra Version 14.0.0.117. Four of the fourteen described analogues met all of the requirements for the Lipinski rule of five including benzoylbenzophenone analogues **1**, **2**, **8** which were potent inhibitors of cathepsin L with IC<sub>50</sub> values less than 25 nM. An additional six analogues met all but one requirement including 1,3-bis(2-fluorobenzoyl)-5-bromobenzene thiosemicarbazone (**32**) which was the most potent cathepsin L inhibitor in this series.

S3. Lipinski, C. A.; Lombardo, F.; Dominy, B.W.; Feeney, P.J. Experimental and computational approaches to estimate solubility and permeability in drug discovery and development settings. *Adv. Drug Deliv. Rev.* **2001**, *46*, 3-26.

<sup>1</sup>H NMR (500 MHz, CDCl<sub>3</sub>) of Compound **1**

8.71  
8.00  
7.99  
7.85  
7.83  
7.83  
7.77  
7.76  
7.76  
7.74  
7.72  
7.71  
7.71  
7.68  
7.67  
7.61  
7.60  
7.60  
7.59  
7.58  
7.58  
7.56  
7.56  
7.55  
7.54  
7.53  
7.52  
7.52  
7.52  
7.51  
7.50  
7.50  
7.48  
7.48  
7.47  
7.47  
7.46  
7.44  
7.43  
7.42  
7.41  
7.40  
7.39  
7.36  
7.34  
7.33  
7.30  
7.29  
7.26  
6.61  
6.57

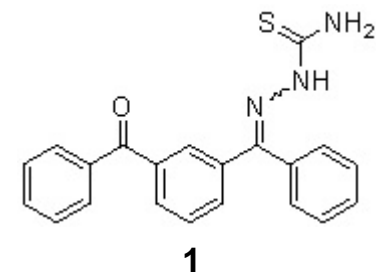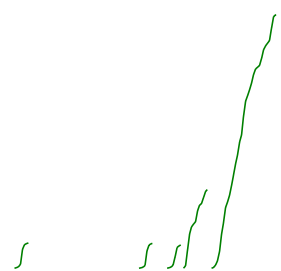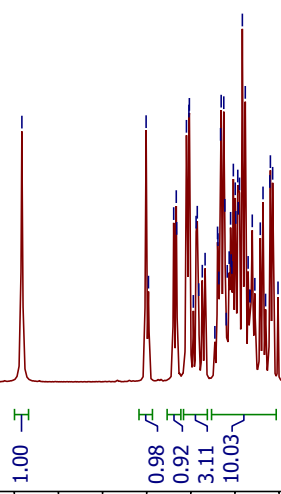

1.00  
0.98  
0.92  
3.11  
10.03  
1.02

11.0 10.5 10.0 9.5 9.0 8.5 8.0 7.5 7.0 6.5 6.0 5.5 5.0 4.5 4.0 3.5 3.0 2.5 2.0 1.5 1.0 0.5 0.0 -0.5 -1.0

<sup>13</sup>C NMR (125 MHz, CDCl<sub>3</sub>) of Compound **1**

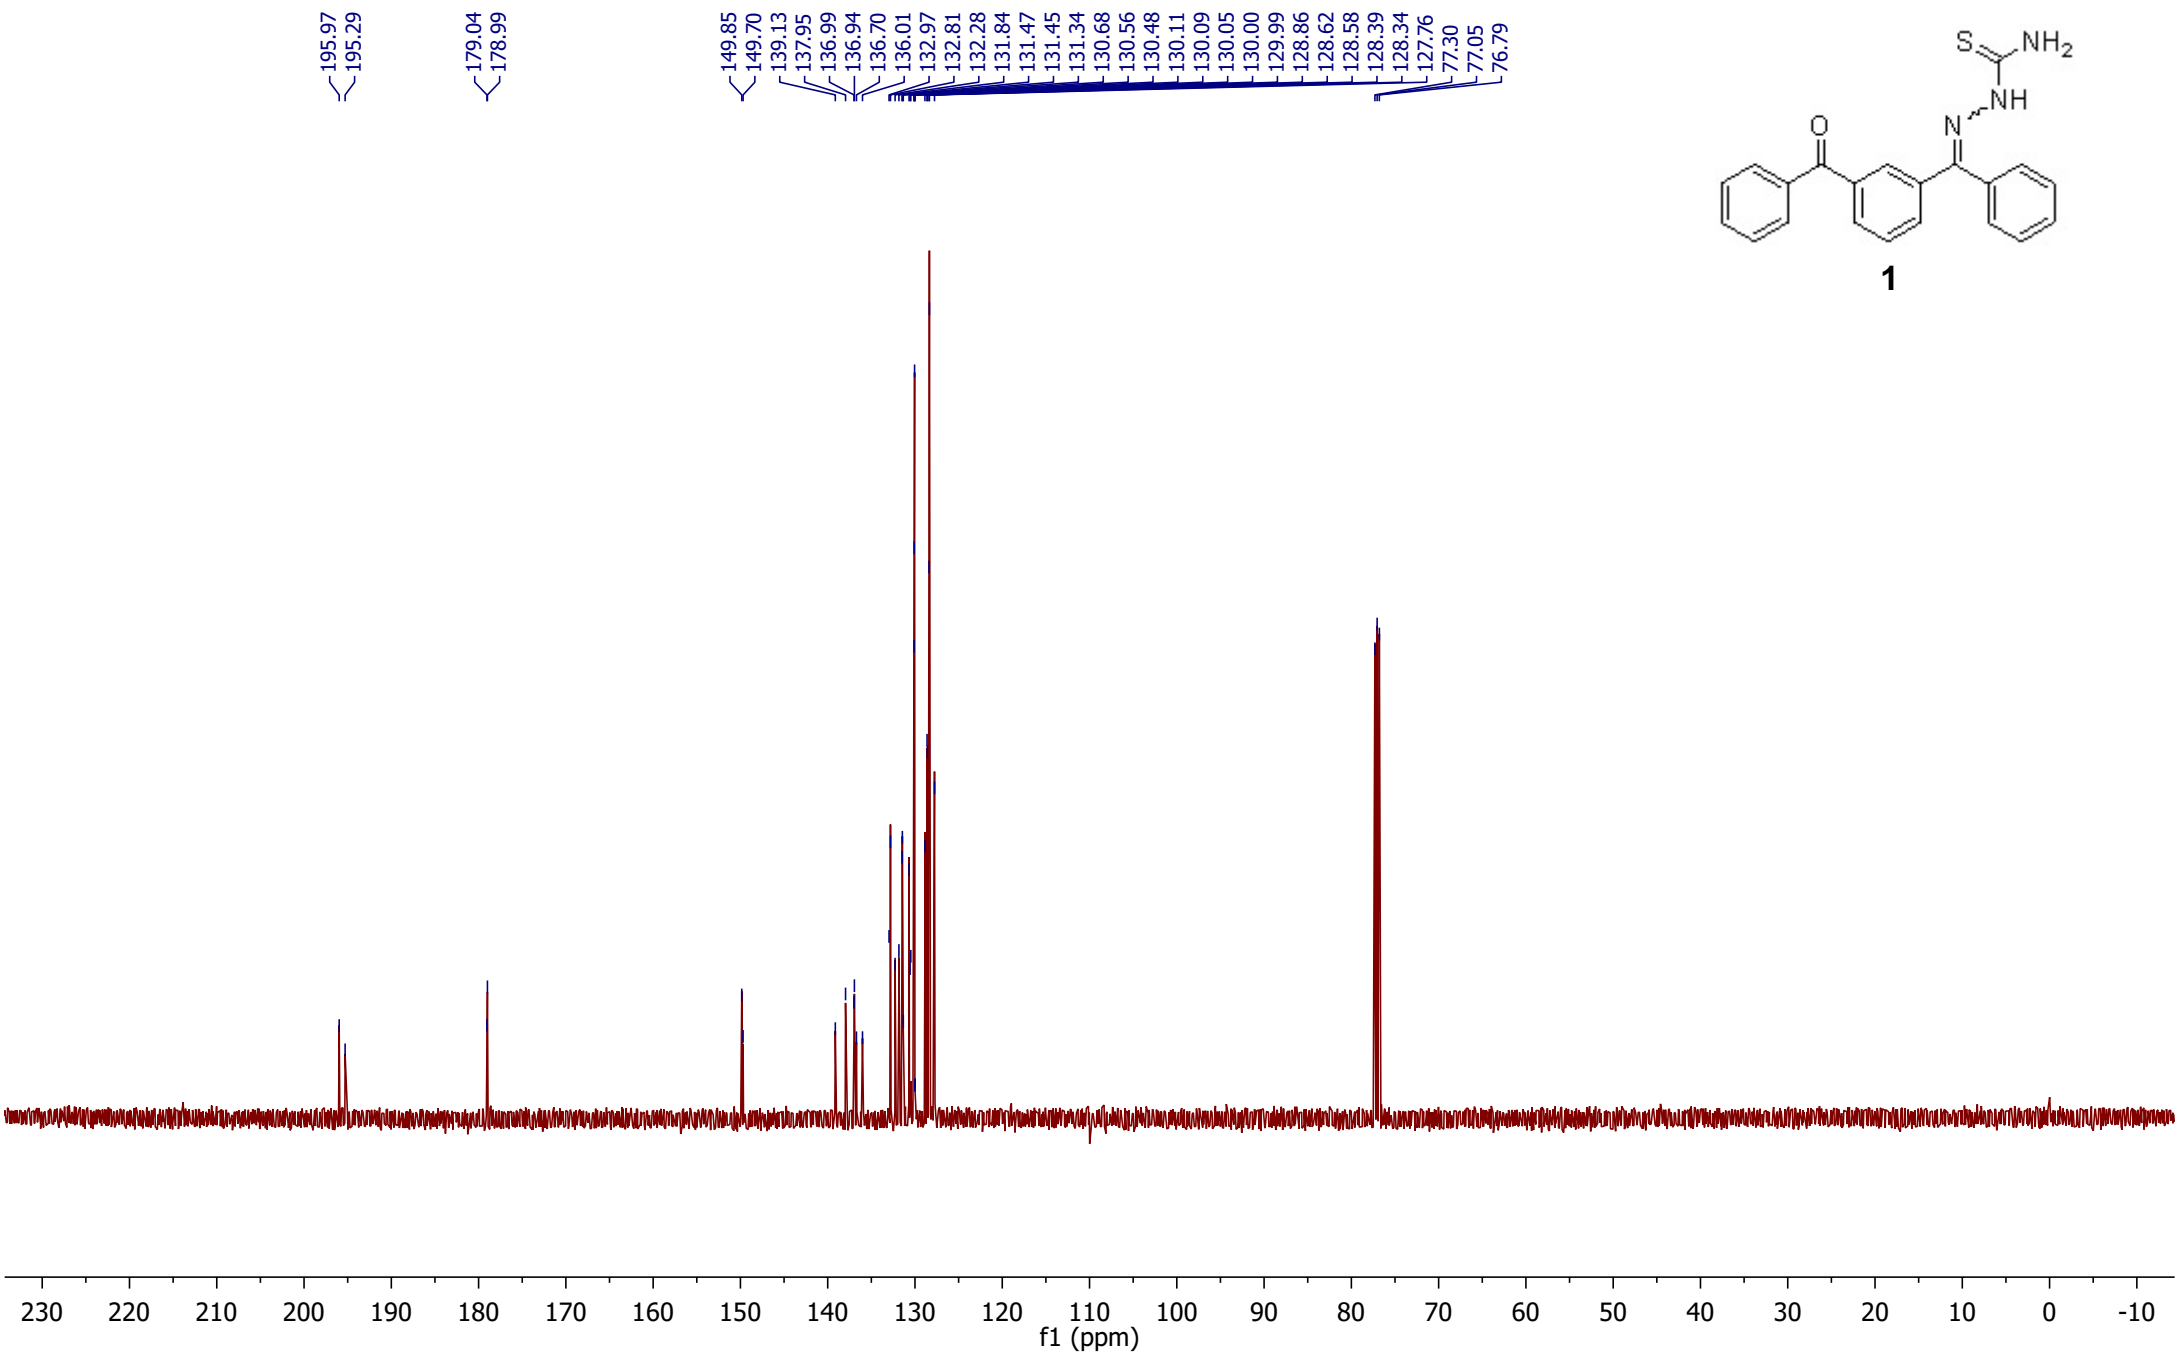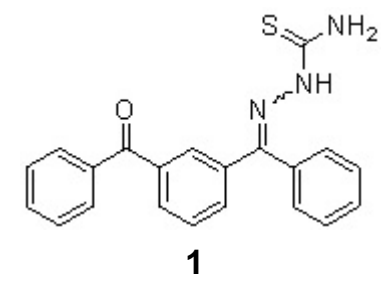



### HPLC trace for Compound 1

=====

Acq. Operator : ERICAP  
Acq. Instrument : Instrument 1 Location : -  
Injection Date : 4/30/2014 8:46:11 PM  
Acq. Method : C:\CHEM32\1\METHODS\GRAD 2 50-90 ACN.M  
Last changed : 4/30/2014 8:33:48 PM by ERICAP  
Analysis Method : C:\CHEM32\1\DATA\ERICAP\ENPI119C2000031.D\DA.M (GRAD 2 50-90 ACN.M)  
Last changed : 6/12/2014 9:00:39 PM by ERICAP  
Sample Info : ENP-I-119C2

Method:

0-25 Min. 50:70 to 90:10 ACN:Water  
25-30 min 90:10 ACN:Water

Exist as a mixture of E/Z geometrical isomers in solution as shown  
in H NMR spectra. One peak observed in HPLC trace.

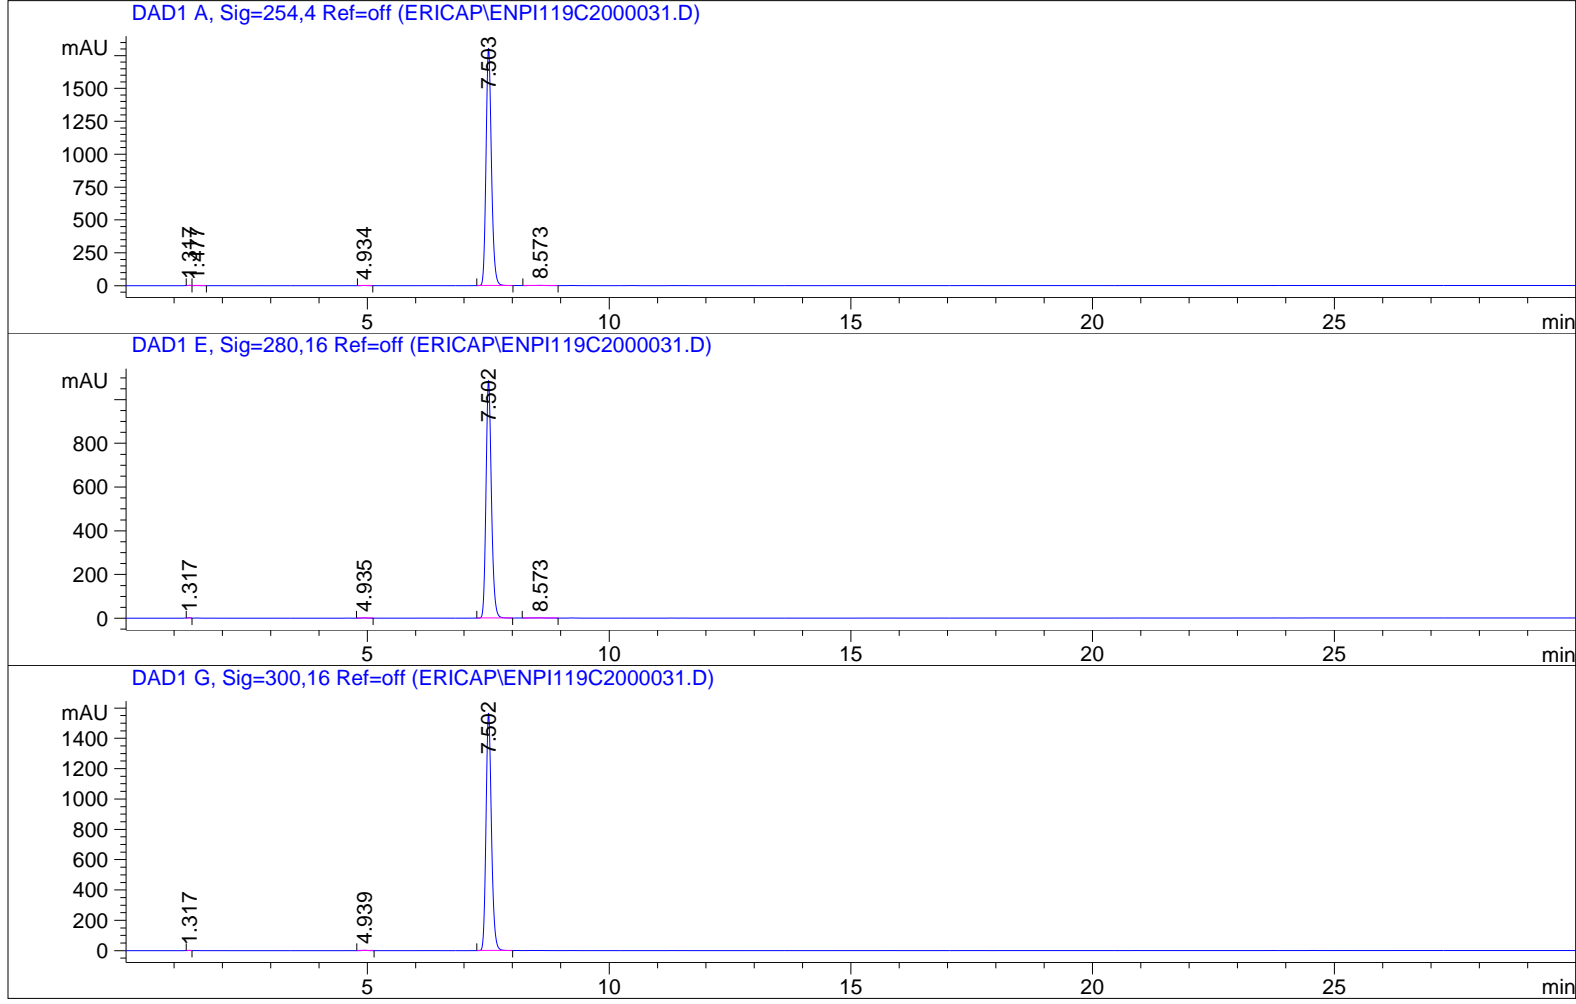

HPLC trace for Compound 1

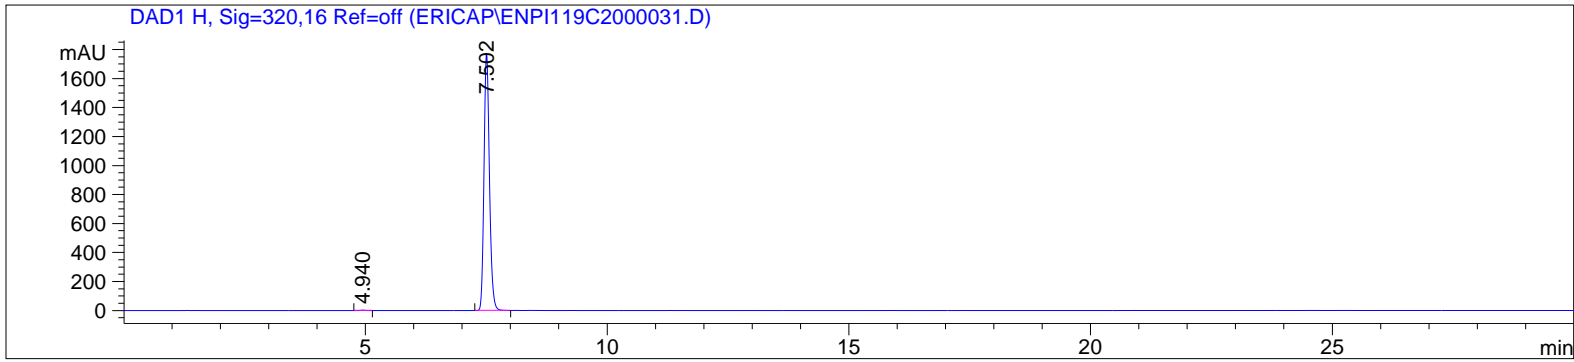

=====  
 Area Percent Report  
 =====

Sorted By : Signal  
 Multiplier : 1.0000  
 Dilution : 1.0000  
 Use Multiplier & Dilution Factor with ISTDs

Signal 1: DAD1 A, Sig=254,4 Ref=off

| Peak # | RetTime [min] | Type | Width [min] | Area [mAU*s] | Height [mAU] | Area %  |
|--------|---------------|------|-------------|--------------|--------------|---------|
| 1      | 1.317         | VV   | 0.0607      | 11.49589     | 2.99857      | 0.0816  |
| 2      | 1.477         | VB   | 0.1100      | 8.45992      | 1.00686      | 0.0600  |
| 3      | 4.934         | BB   | 0.1022      | 10.68842     | 1.59365      | 0.0758  |
| 4      | 7.503         | BV   | 0.1186      | 1.40410e4    | 1807.92151   | 99.6153 |
| 5      | 8.573         | BB   | 0.1992      | 23.57483     | 1.62574      | 0.1673  |

Totals : 1.40952e4 1815.14633

Signal 2: DAD1 E, Sig=280,16 Ref=off

| Peak # | RetTime [min] | Type | Width [min] | Area [mAU*s] | Height [mAU] | Area %  |
|--------|---------------|------|-------------|--------------|--------------|---------|
| 1      | 1.317         | VV   | 0.0581      | 8.17845      | 2.16238      | 0.0965  |
| 2      | 4.935         | BB   | 0.1035      | 8.52693      | 1.25072      | 0.1006  |
| 3      | 7.502         | BB   | 0.1185      | 8439.92578   | 1087.78320   | 99.6183 |
| 4      | 8.573         | BB   | 0.2021      | 15.63683     | 1.05998      | 0.1846  |

Totals : 8472.26799 1092.25627

Signal 3: DAD1 G, Sig=300,16 Ref=off

| Peak # | RetTime [min] | Type | Width [min] | Area [mAU*s] | Height [mAU] | Area %  |
|--------|---------------|------|-------------|--------------|--------------|---------|
| 1      | 1.317         | VV   | 0.0605      | 6.14071      | 1.61129      | 0.0502  |
| 2      | 4.939         | BB   | 0.0972      | 15.49905     | 2.40321      | 0.1267  |
| 3      | 7.502         | BB   | 0.1188      | 1.22073e4    | 1567.96350   | 99.8230 |

HPLC trace for Compound 1

Totals : 1.22289e4 1571.97800

Signal 4: DAD1 H, Sig=320,16 Ref=off

| Peak # | RetTime [min] | Type | Width [min] | Area [mAU*s] | Height [mAU] | Area %  |
|--------|---------------|------|-------------|--------------|--------------|---------|
| 1      | 4.940         | BB   | 0.0980      | 16.79182     | 2.64776      | 0.1208  |
| 2      | 7.502         | BV   | 0.1193      | 1.38877e4    | 1774.05493   | 99.8792 |

Totals : 1.39045e4 1776.70269

=====  
\*\*\* End of Report \*\*\*

# HRMS(ESI) for Compound 1

C:\Xcalibur\...ENP\_I\_119C2\_Orbi\_+ESI  
15  $\mu$ L per min

1/13/2015 4:05:14 PM

ENP\_I\_119C2\_Orbi\_+ESI #7 RT: 0.09 AV: 1 NL: 7.61E5  
T: FTMS + p ESI Full ms [75.00-1000.00]

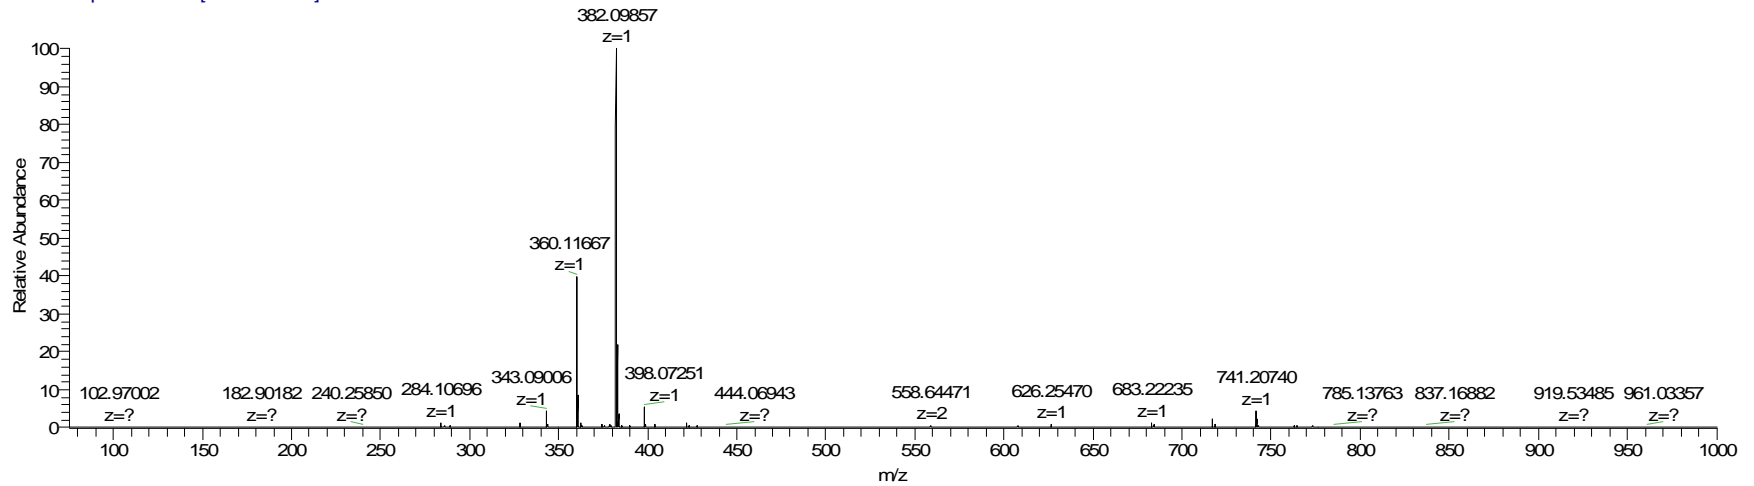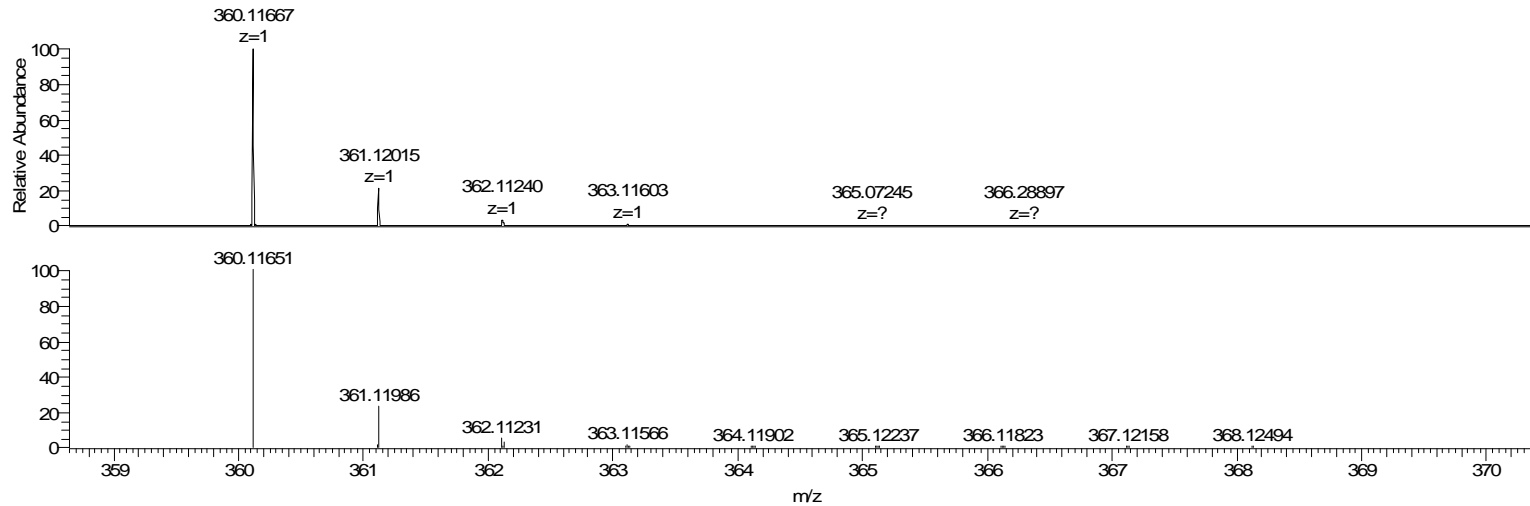

NL:  
3.03E5  
ENP\_I\_119C2\_Orbi\_+  
ESI#7 RT: 0.09 AV:  
1 T: FTMS + p ESI  
Full ms  
[75.00-1000.00]

NL:  
7.46E5  
C21H17N3OS+H  
C21H18N3O1S1  
pa Chrg 1

<sup>1</sup>H NMR (500 MHz, Acetone-d<sub>6</sub>) of Compound

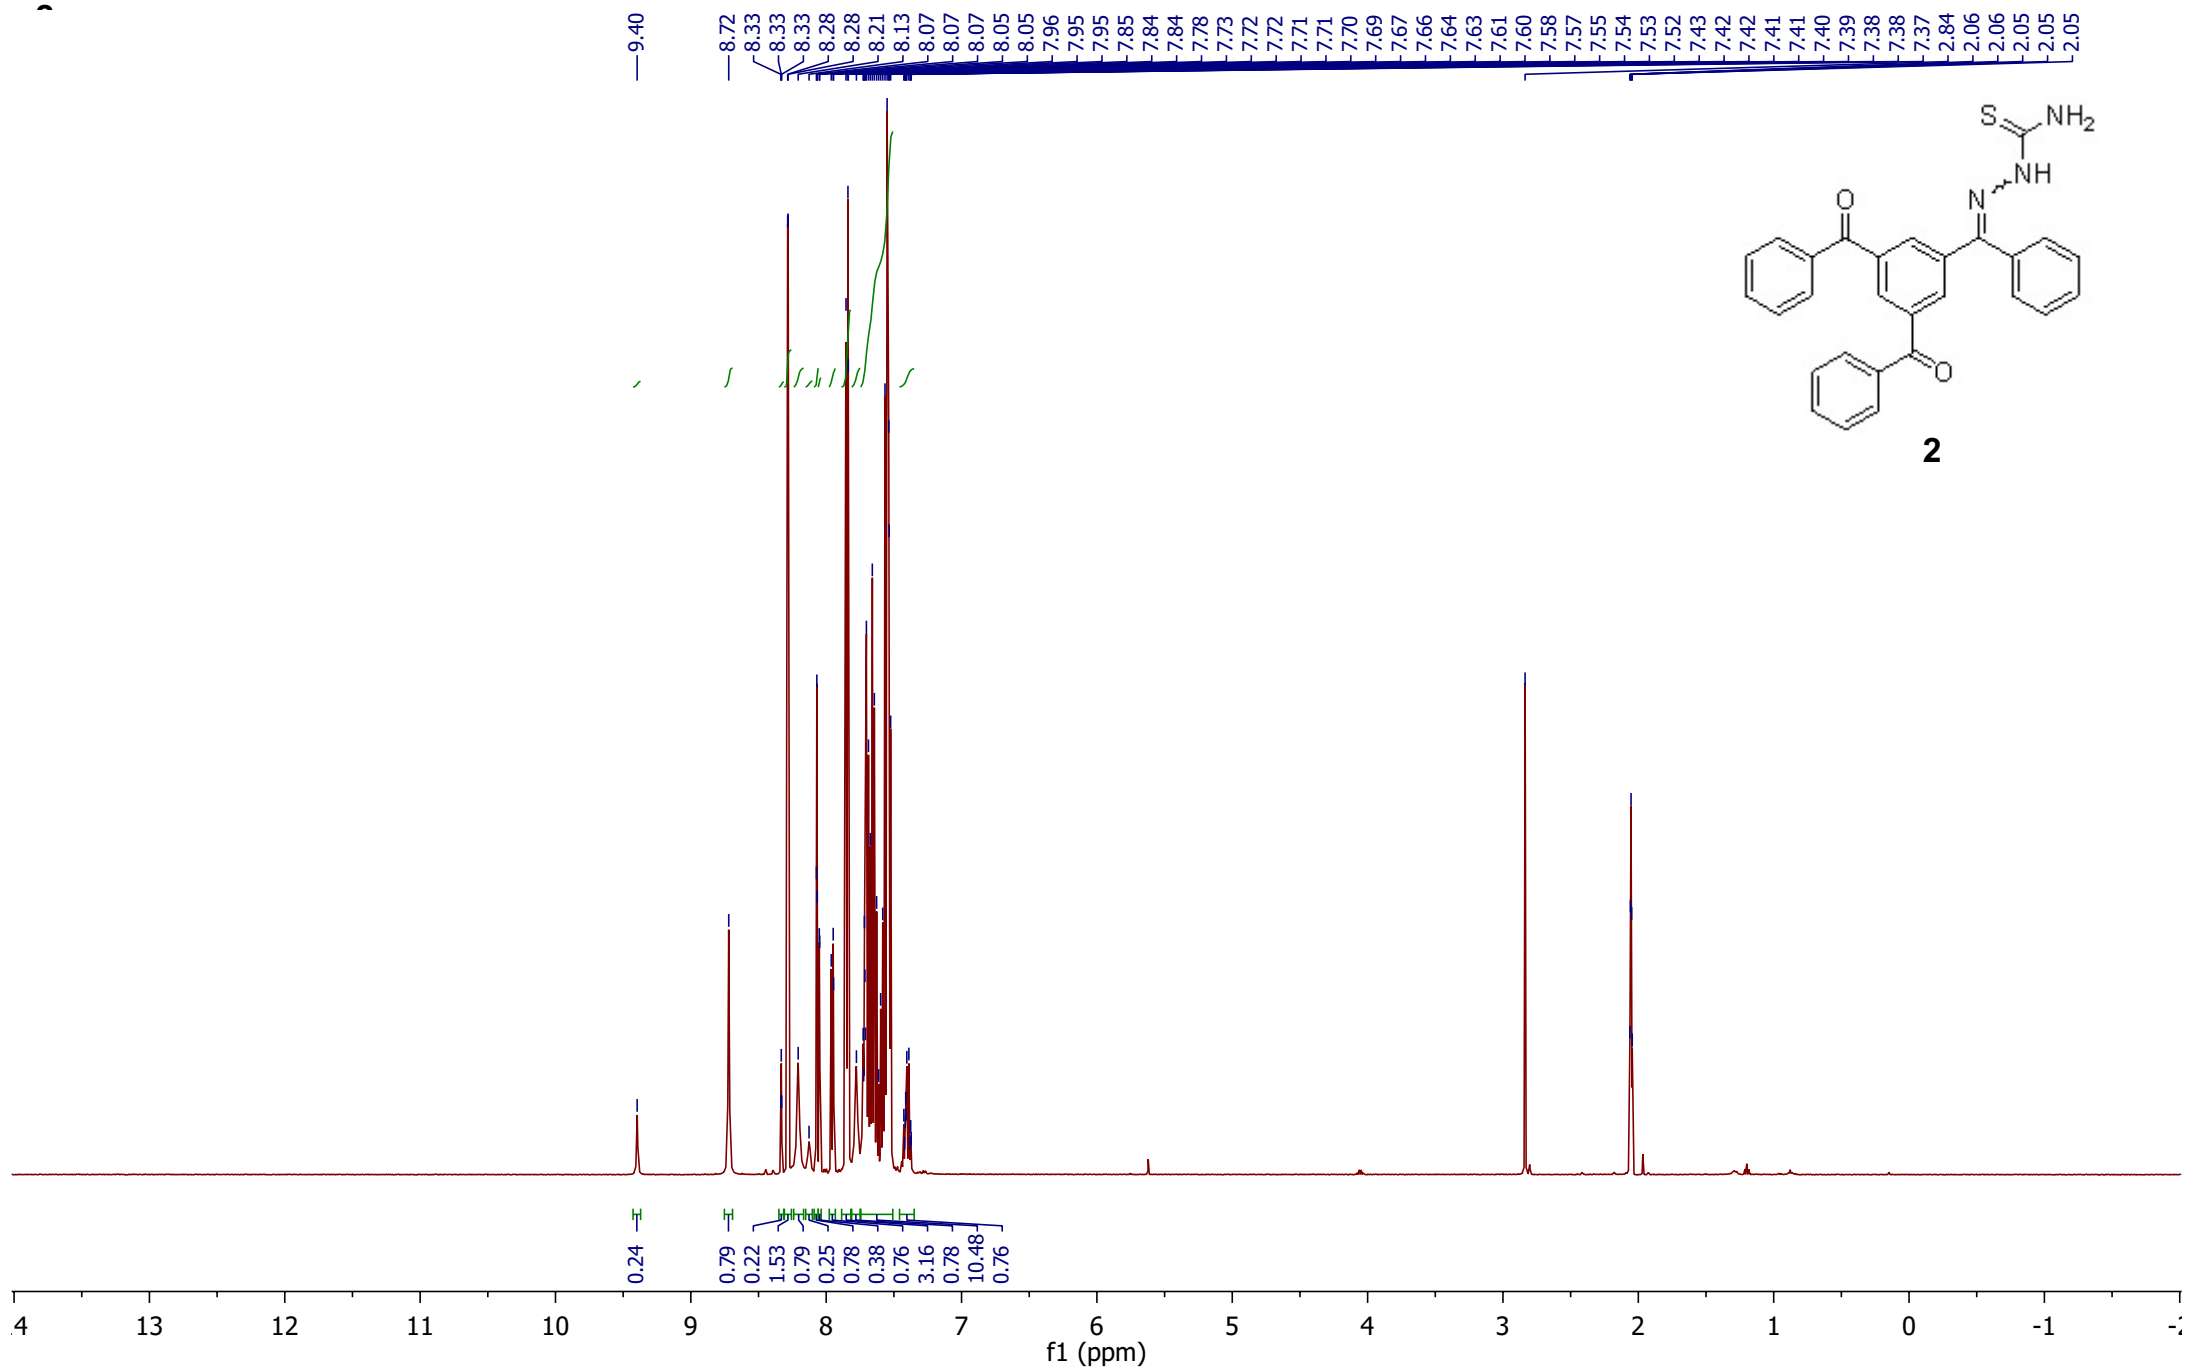

<sup>13</sup>C NMR (125 MHz, Acetone-d<sub>6</sub>) of Compound **2**

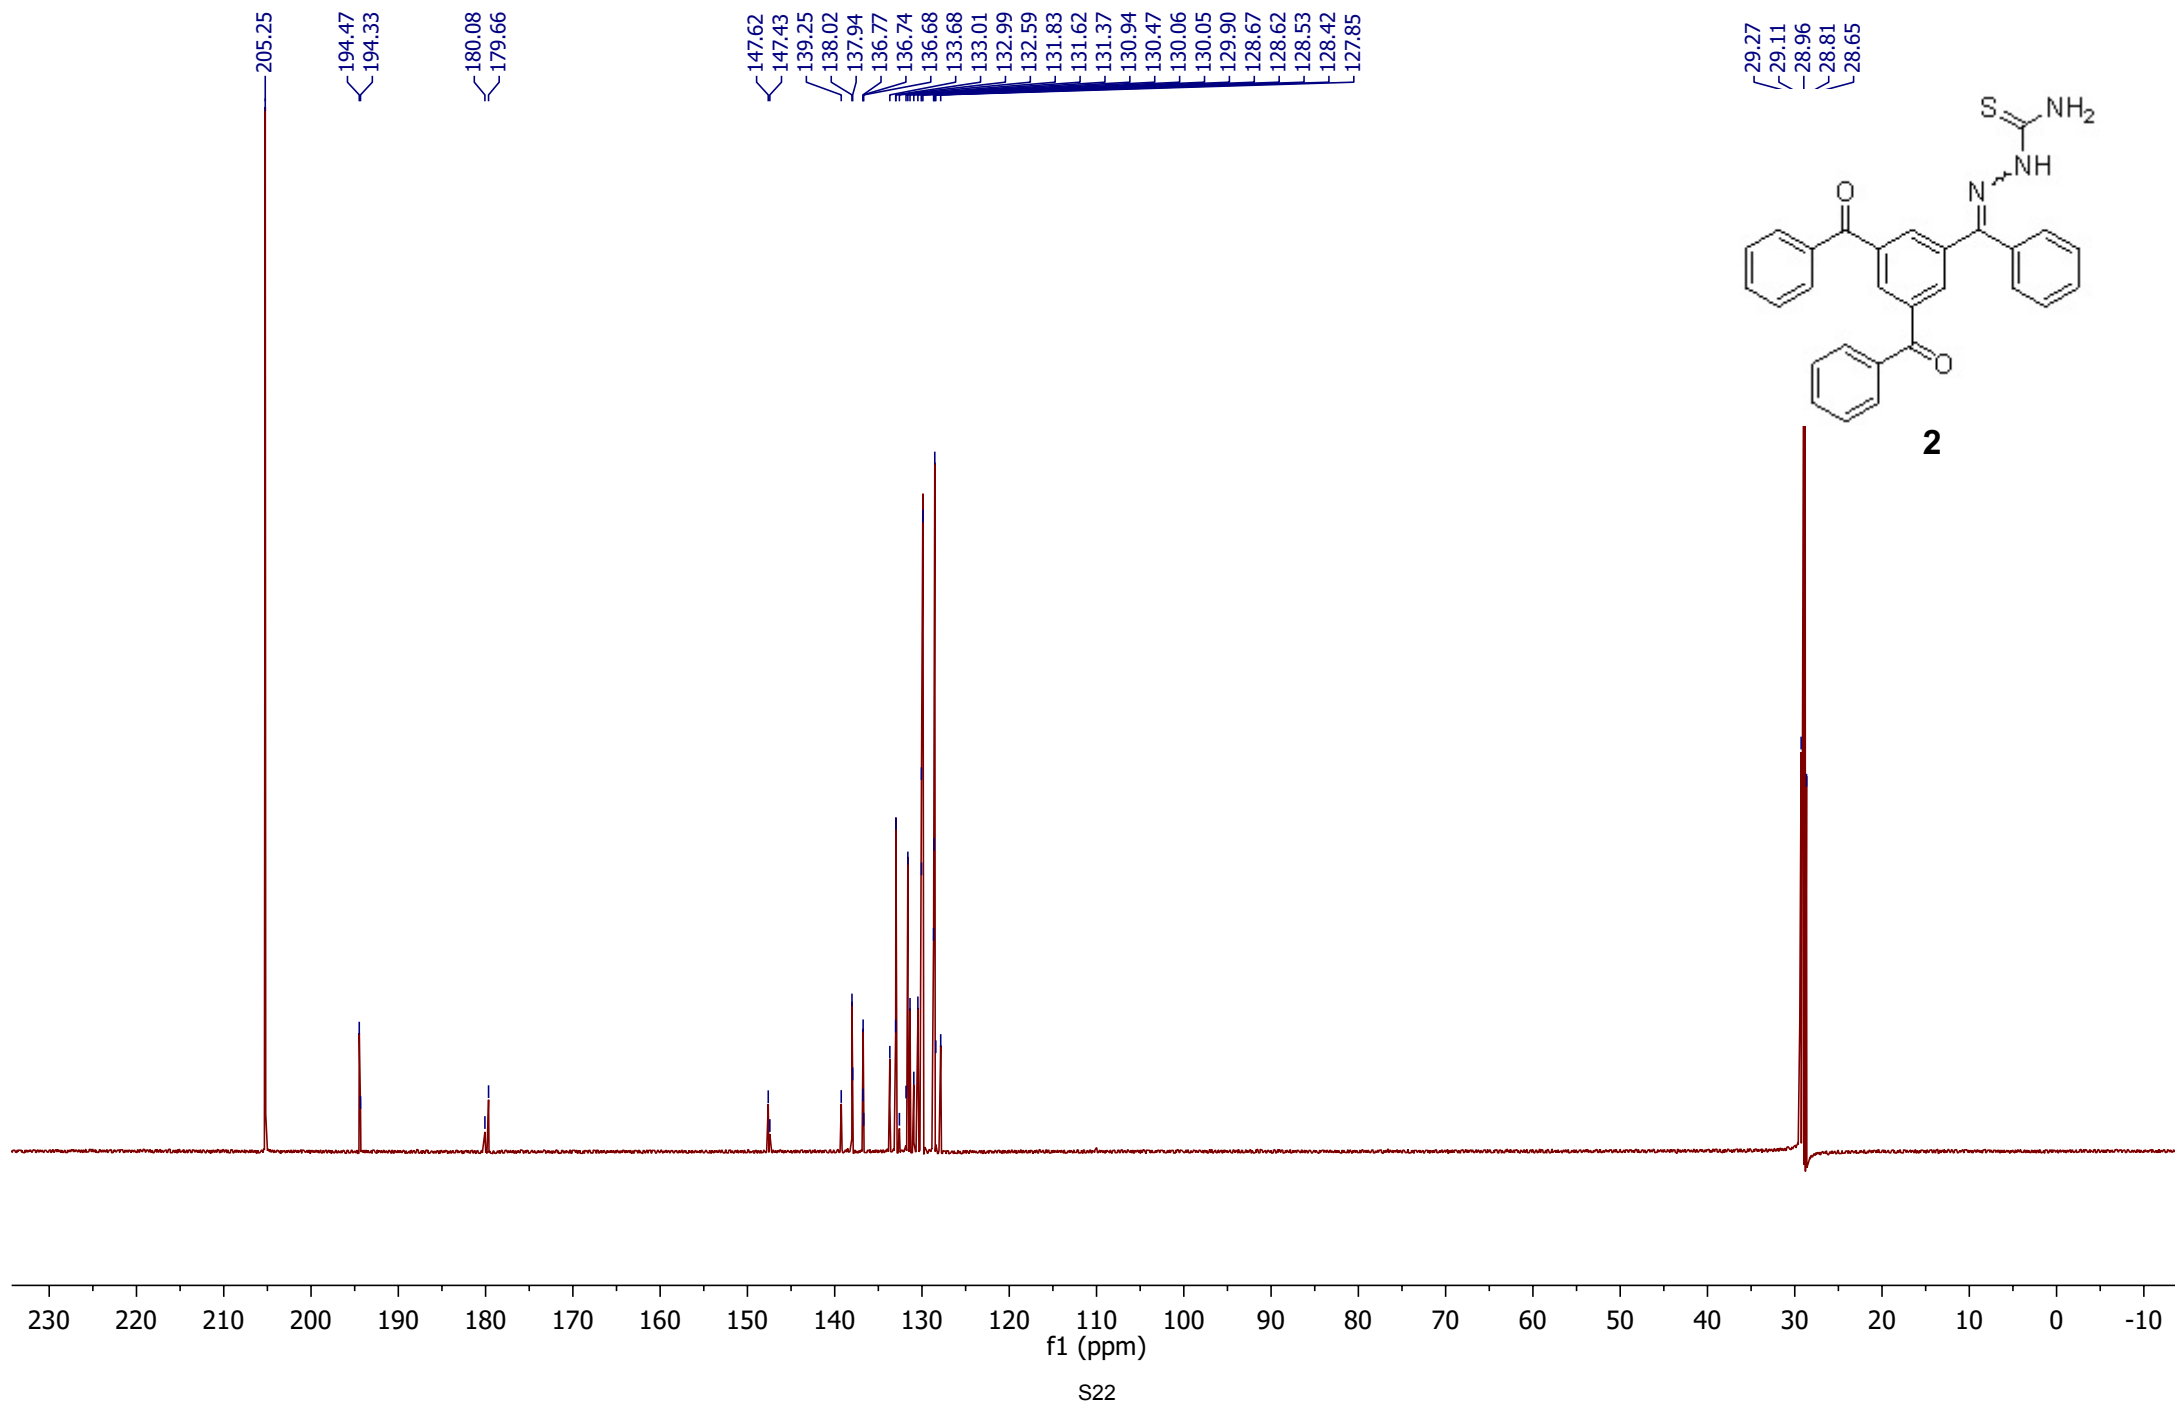

### HPLC trace for Compound 2

=====

Acq. Operator : ERICAP  
Acq. Instrument : Instrument 1 Location : -  
Injection Date : 5/6/2014 4:53:37 PM  
Acq. Method : C:\CHEM32\1\METHODS\GRAD 2 50-90 ACN.M  
Last changed : 5/6/2014 4:35:52 PM by ERICAP  
Analysis Method : C:\CHEM32\1\DATA\ERICAP\ENPIV63000031.D\DA.M (GRAD 2 50-90 ACN.M)  
Last changed : 6/12/2014 9:33:14 PM by ERICAP  
(modified after loading)  
Sample Info : ENP-IV-63

Method:

0-25 Min. 50:70 to 90:10 ACN:Water  
25-30 min 90:10 ACN:Water

Two peaks observed in the HPLC traces are due to the presence of both E and Z geometrical isomers.

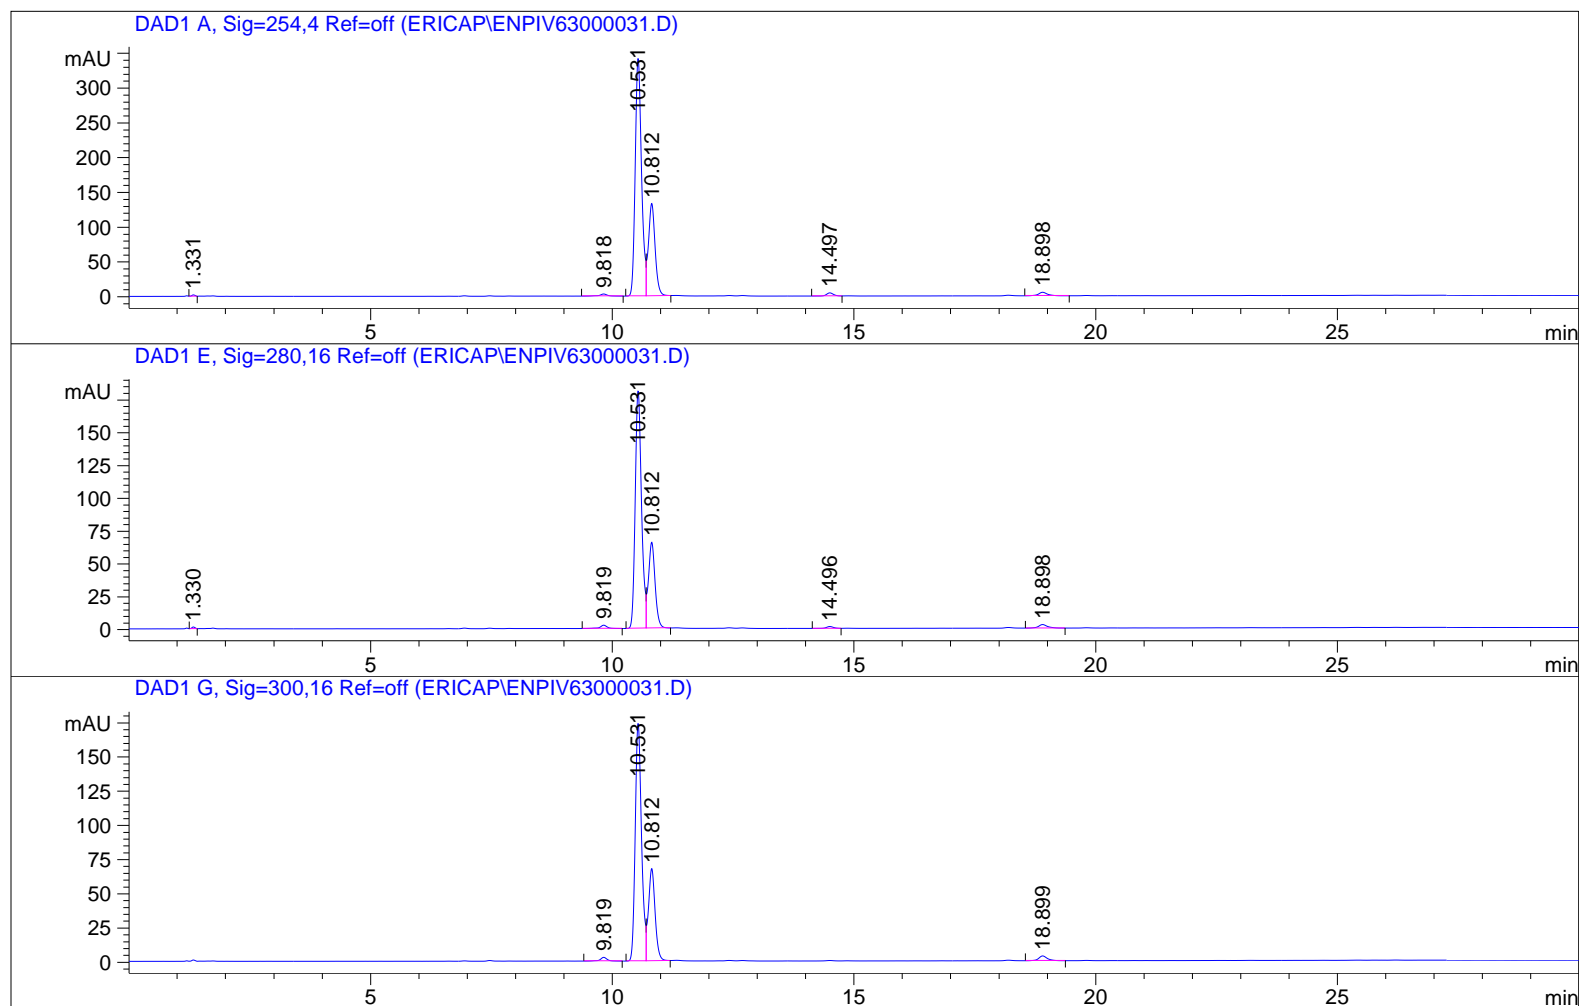

HPLC trace for Compound 2

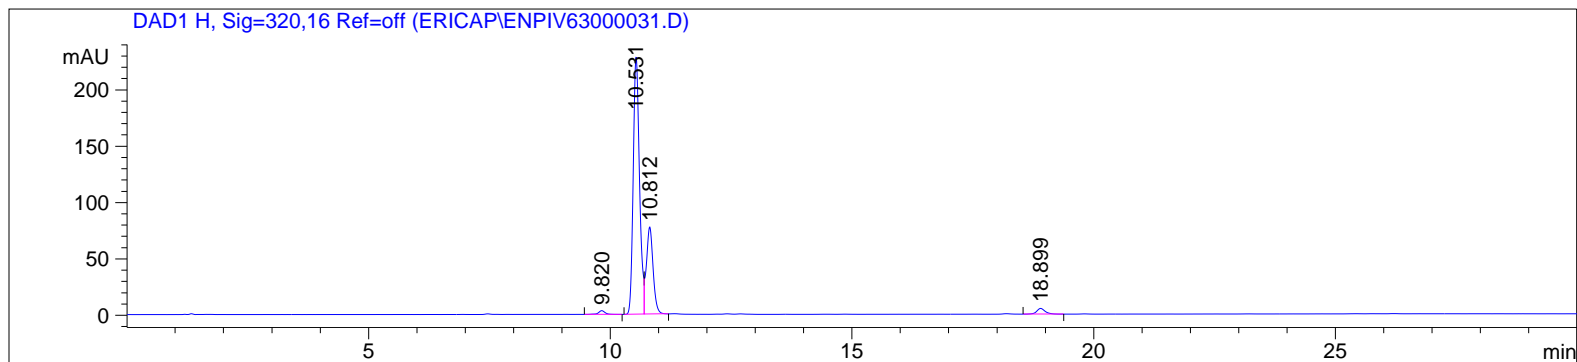

=====  
 Area Percent Report  
 =====

Sorted By : Signal  
 Multiplier : 1.0000  
 Dilution : 1.0000  
 Use Multiplier & Dilution Factor with ISTDs

Signal 1: DAD1 A, Sig=254,4 Ref=off

| Peak # | RetTime [min] | Type | Width [min] | Area [mAU*s] | Height [mAU] | Area %  |
|--------|---------------|------|-------------|--------------|--------------|---------|
| 1      | 1.331         | VB   | 0.0801      | 9.27306      | 1.92741      | 0.2052  |
| 2      | 9.818         | BB   | 0.1577      | 33.11596     | 3.02603      | 0.7329  |
| 3      | 10.531        | BV   | 0.1379      | 3100.09985   | 341.60989    | 68.6120 |
| 4      | 10.812        | VB   | 0.1434      | 1267.09900   | 132.72452    | 28.0437 |
| 5      | 14.497        | BB   | 0.1494      | 43.23214     | 4.44772      | 0.9568  |
| 6      | 18.898        | BB   | 0.1915      | 65.48833     | 5.04203      | 1.4494  |

Totals : 4518.30835 488.77760

Signal 2: DAD1 E, Sig=280,16 Ref=off

| Peak # | RetTime [min] | Type | Width [min] | Area [mAU*s] | Height [mAU] | Area %  |
|--------|---------------|------|-------------|--------------|--------------|---------|
| 1      | 1.330         | VB   | 0.0794      | 6.40372      | 1.34918      | 0.2729  |
| 2      | 9.819         | BB   | 0.1511      | 25.79784     | 2.52687      | 1.0993  |
| 3      | 10.531        | BV   | 0.1378      | 1641.14832   | 180.91077    | 69.9311 |
| 4      | 10.812        | VB   | 0.1434      | 625.02472    | 65.48306     | 26.6330 |
| 5      | 14.496        | BB   | 0.1498      | 13.60712     | 1.39464      | 0.5798  |
| 6      | 18.898        | BB   | 0.1910      | 34.82704     | 2.69104      | 1.4840  |

Totals : 2346.80876 254.35555

Signal 3: DAD1 G, Sig=300,16 Ref=off



HPLC trace for Compound 2

| Peak # | RetTime [min] | Type | Width [min] | Area [mAU*s] | Height [mAU] | Area %  |
|--------|---------------|------|-------------|--------------|--------------|---------|
| 1      | 9.819         | BB   | 0.1446      | 26.63732     | 2.71282      | 1.1641  |
| 2      | 10.531        | BV   | 0.1378      | 1575.84021   | 173.70177    | 68.8695 |
| 3      | 10.812        | VB   | 0.1433      | 642.73590    | 67.37366     | 28.0897 |
| 4      | 18.899        | BB   | 0.1838      | 42.94009     | 3.48465      | 1.8766  |

Totals : 2288.15352 247.27291

Signal 4: DAD1 H, Sig=320,16 Ref=off

| Peak # | RetTime [min] | Type | Width [min] | Area [mAU*s] | Height [mAU] | Area %  |
|--------|---------------|------|-------------|--------------|--------------|---------|
| 1      | 9.820         | BB   | 0.1406      | 31.34613     | 3.30553      | 1.0816  |
| 2      | 10.531        | BV   | 0.1377      | 2067.92480   | 228.21864    | 71.3532 |
| 3      | 10.812        | VB   | 0.1433      | 737.39844    | 77.28585     | 25.4438 |
| 4      | 18.899        | BB   | 0.1815      | 61.48148     | 5.06982      | 2.1214  |

Totals : 2898.15085 313.87985

=====  
\*\*\* End of Report \*\*\*

# HRMS(ESI) for Compound 2

C:\Xcalibur...01-02-2015\ENP\_IV\_63

1/2/2015 9:35:32 PM

ENP\_IV\_63 #296-319 RT: 3.67-3.91 AV: 24 NL: 2.77E6  
T: FTMS + p ESI Full ms [100.00-1000.00]

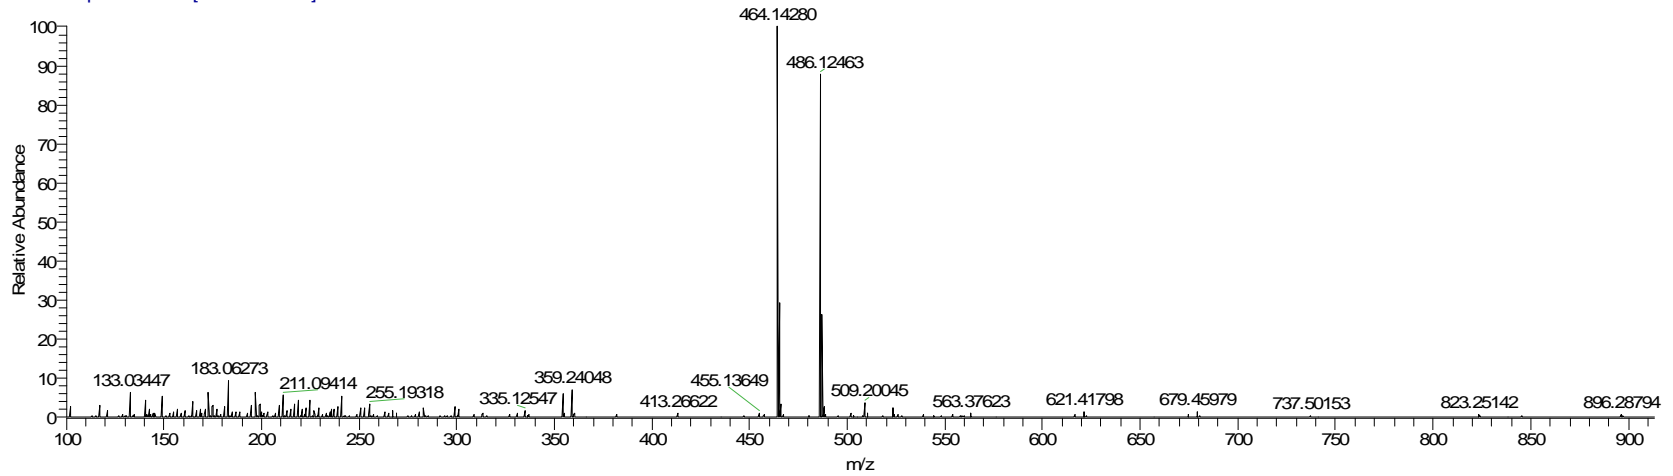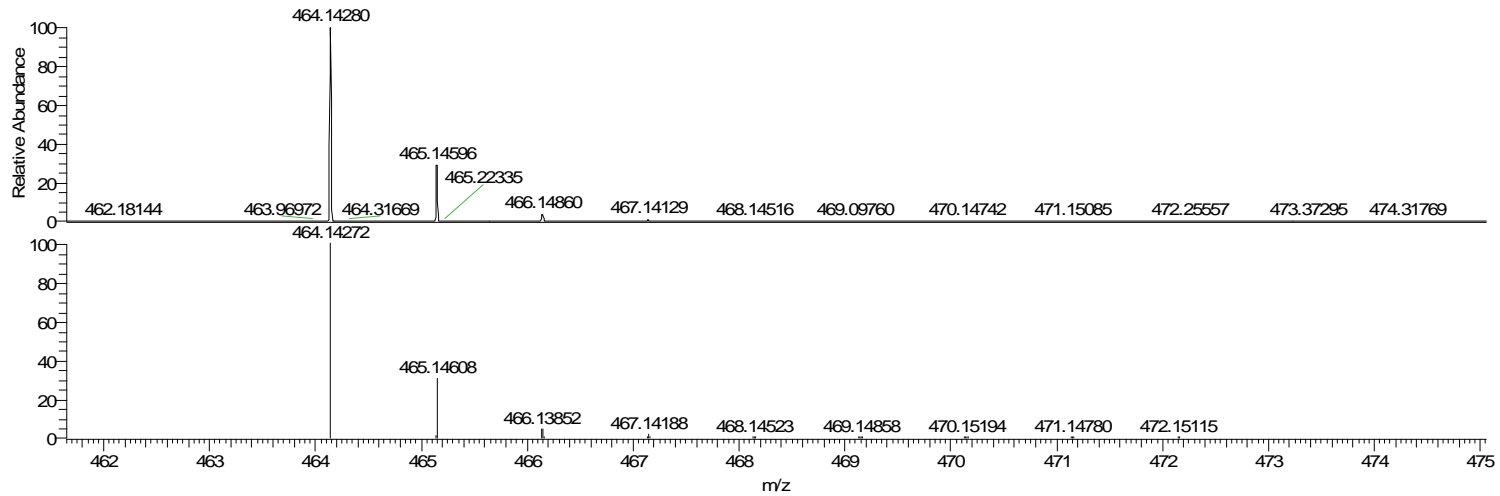

NL:  
2.77E6  
ENP\_IV\_63#296-319  
RT: 3.67-3.91 AV: 24  
T: FTMS + p ESI Full  
ms [100.00-1000.00]

NL:  
6.90E5  
C28H21N3O2S+H  
C28H22N3O2S1  
pa Chrg 1

<sup>1</sup>H NMR (500 MHz, Acetone-d<sub>6</sub>) of Compound **3**

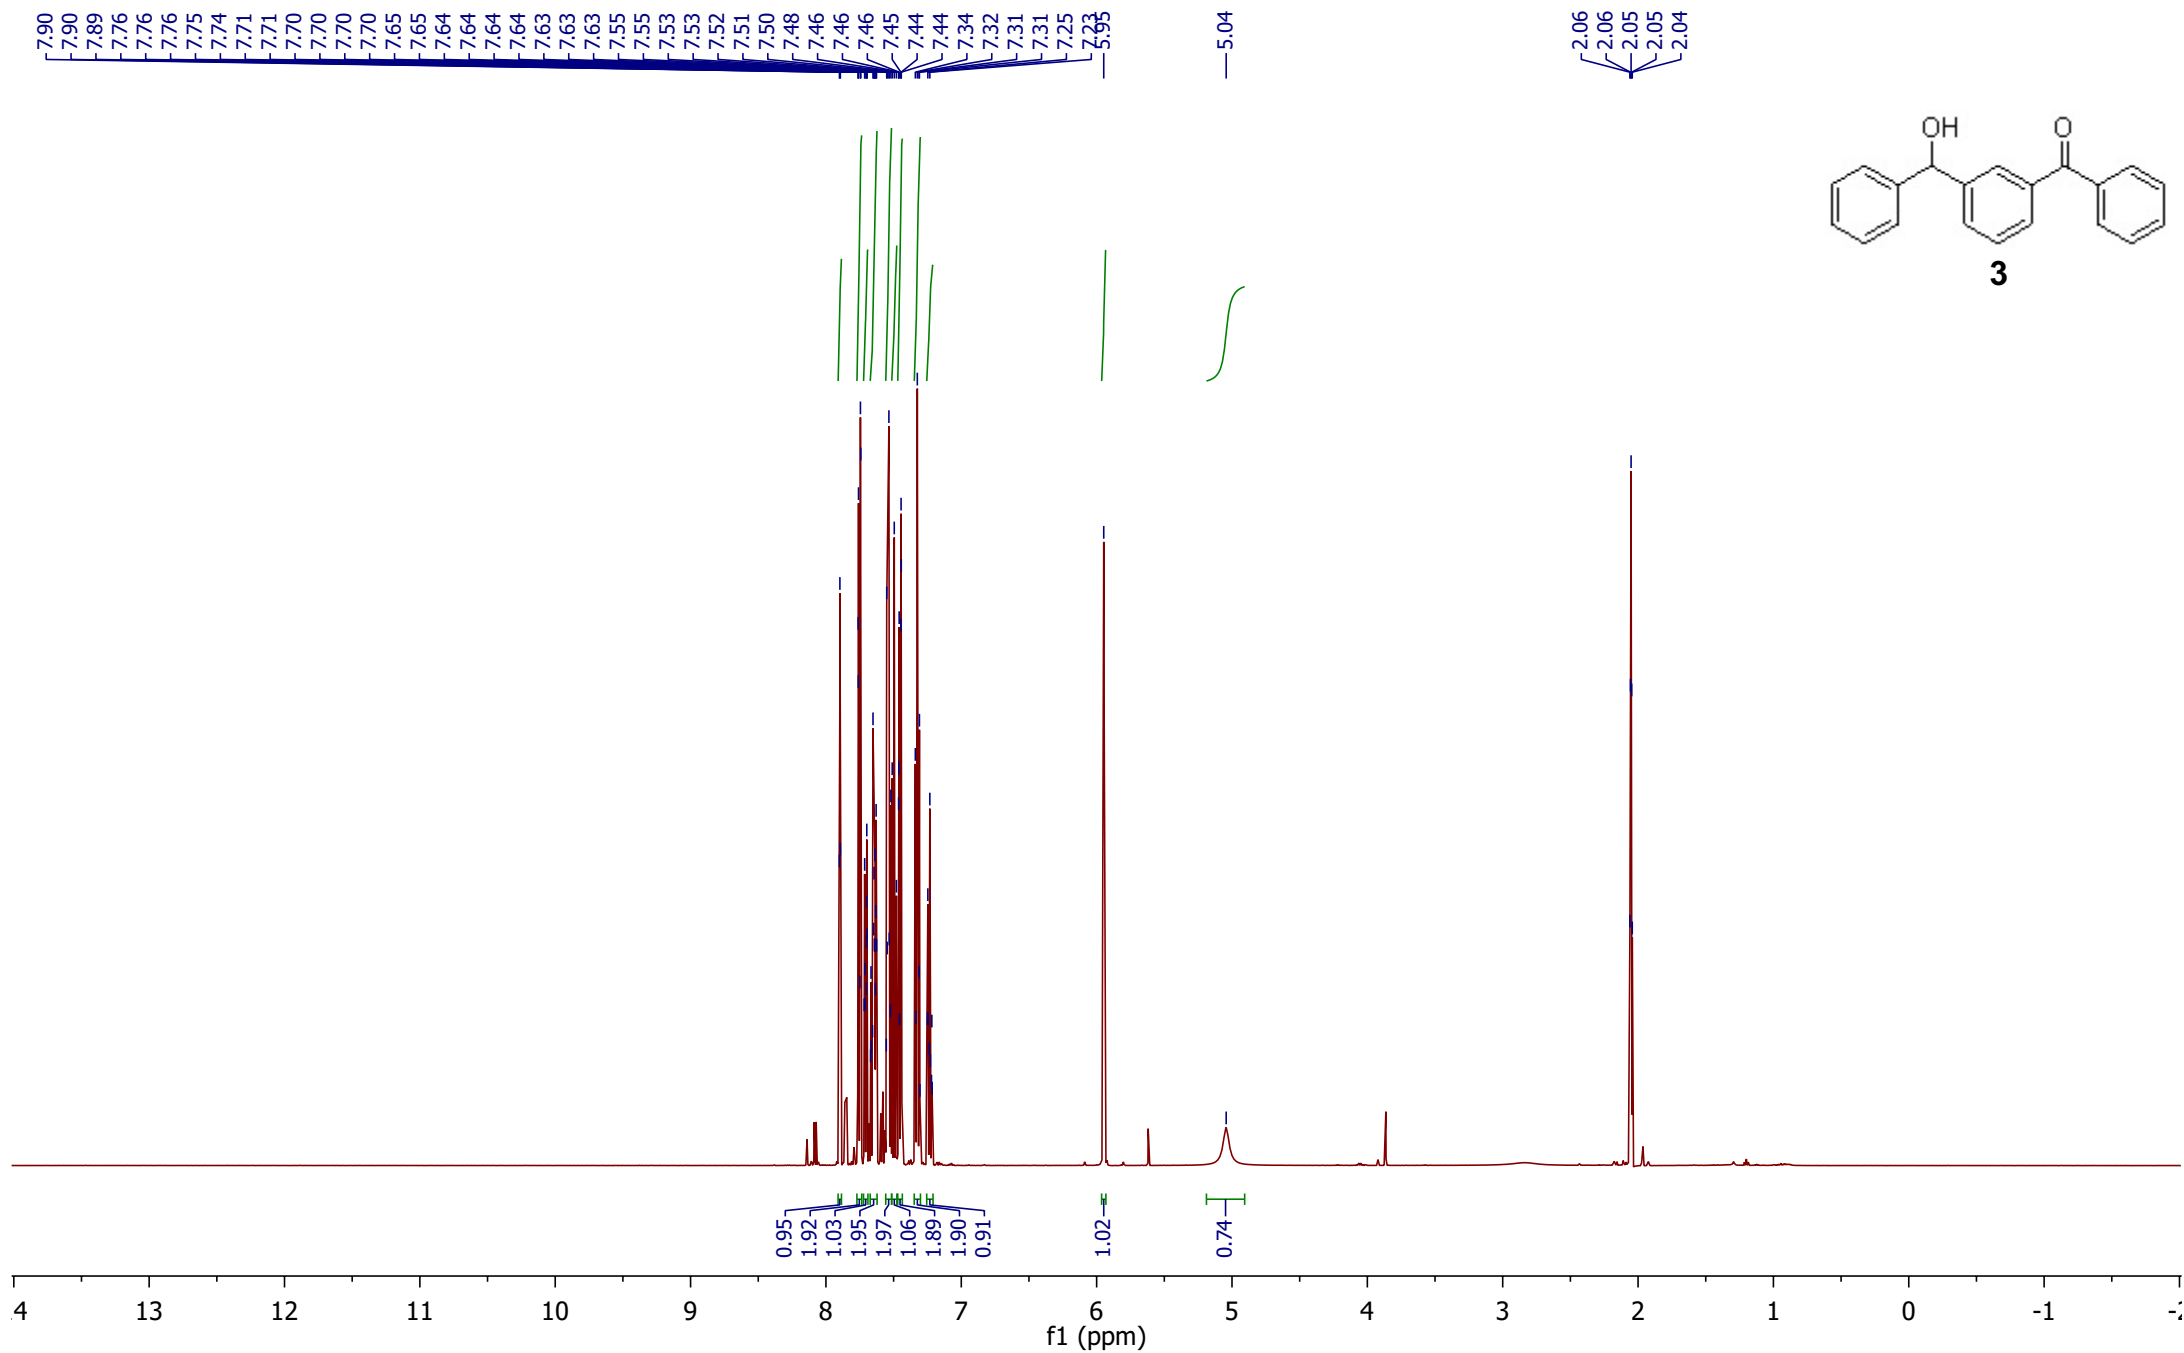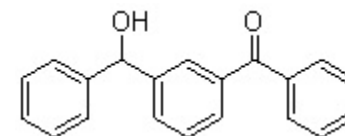

**3**

<sup>1</sup>H NMR (125 MHz, Acetone-d<sub>6</sub>) of Compound **3**

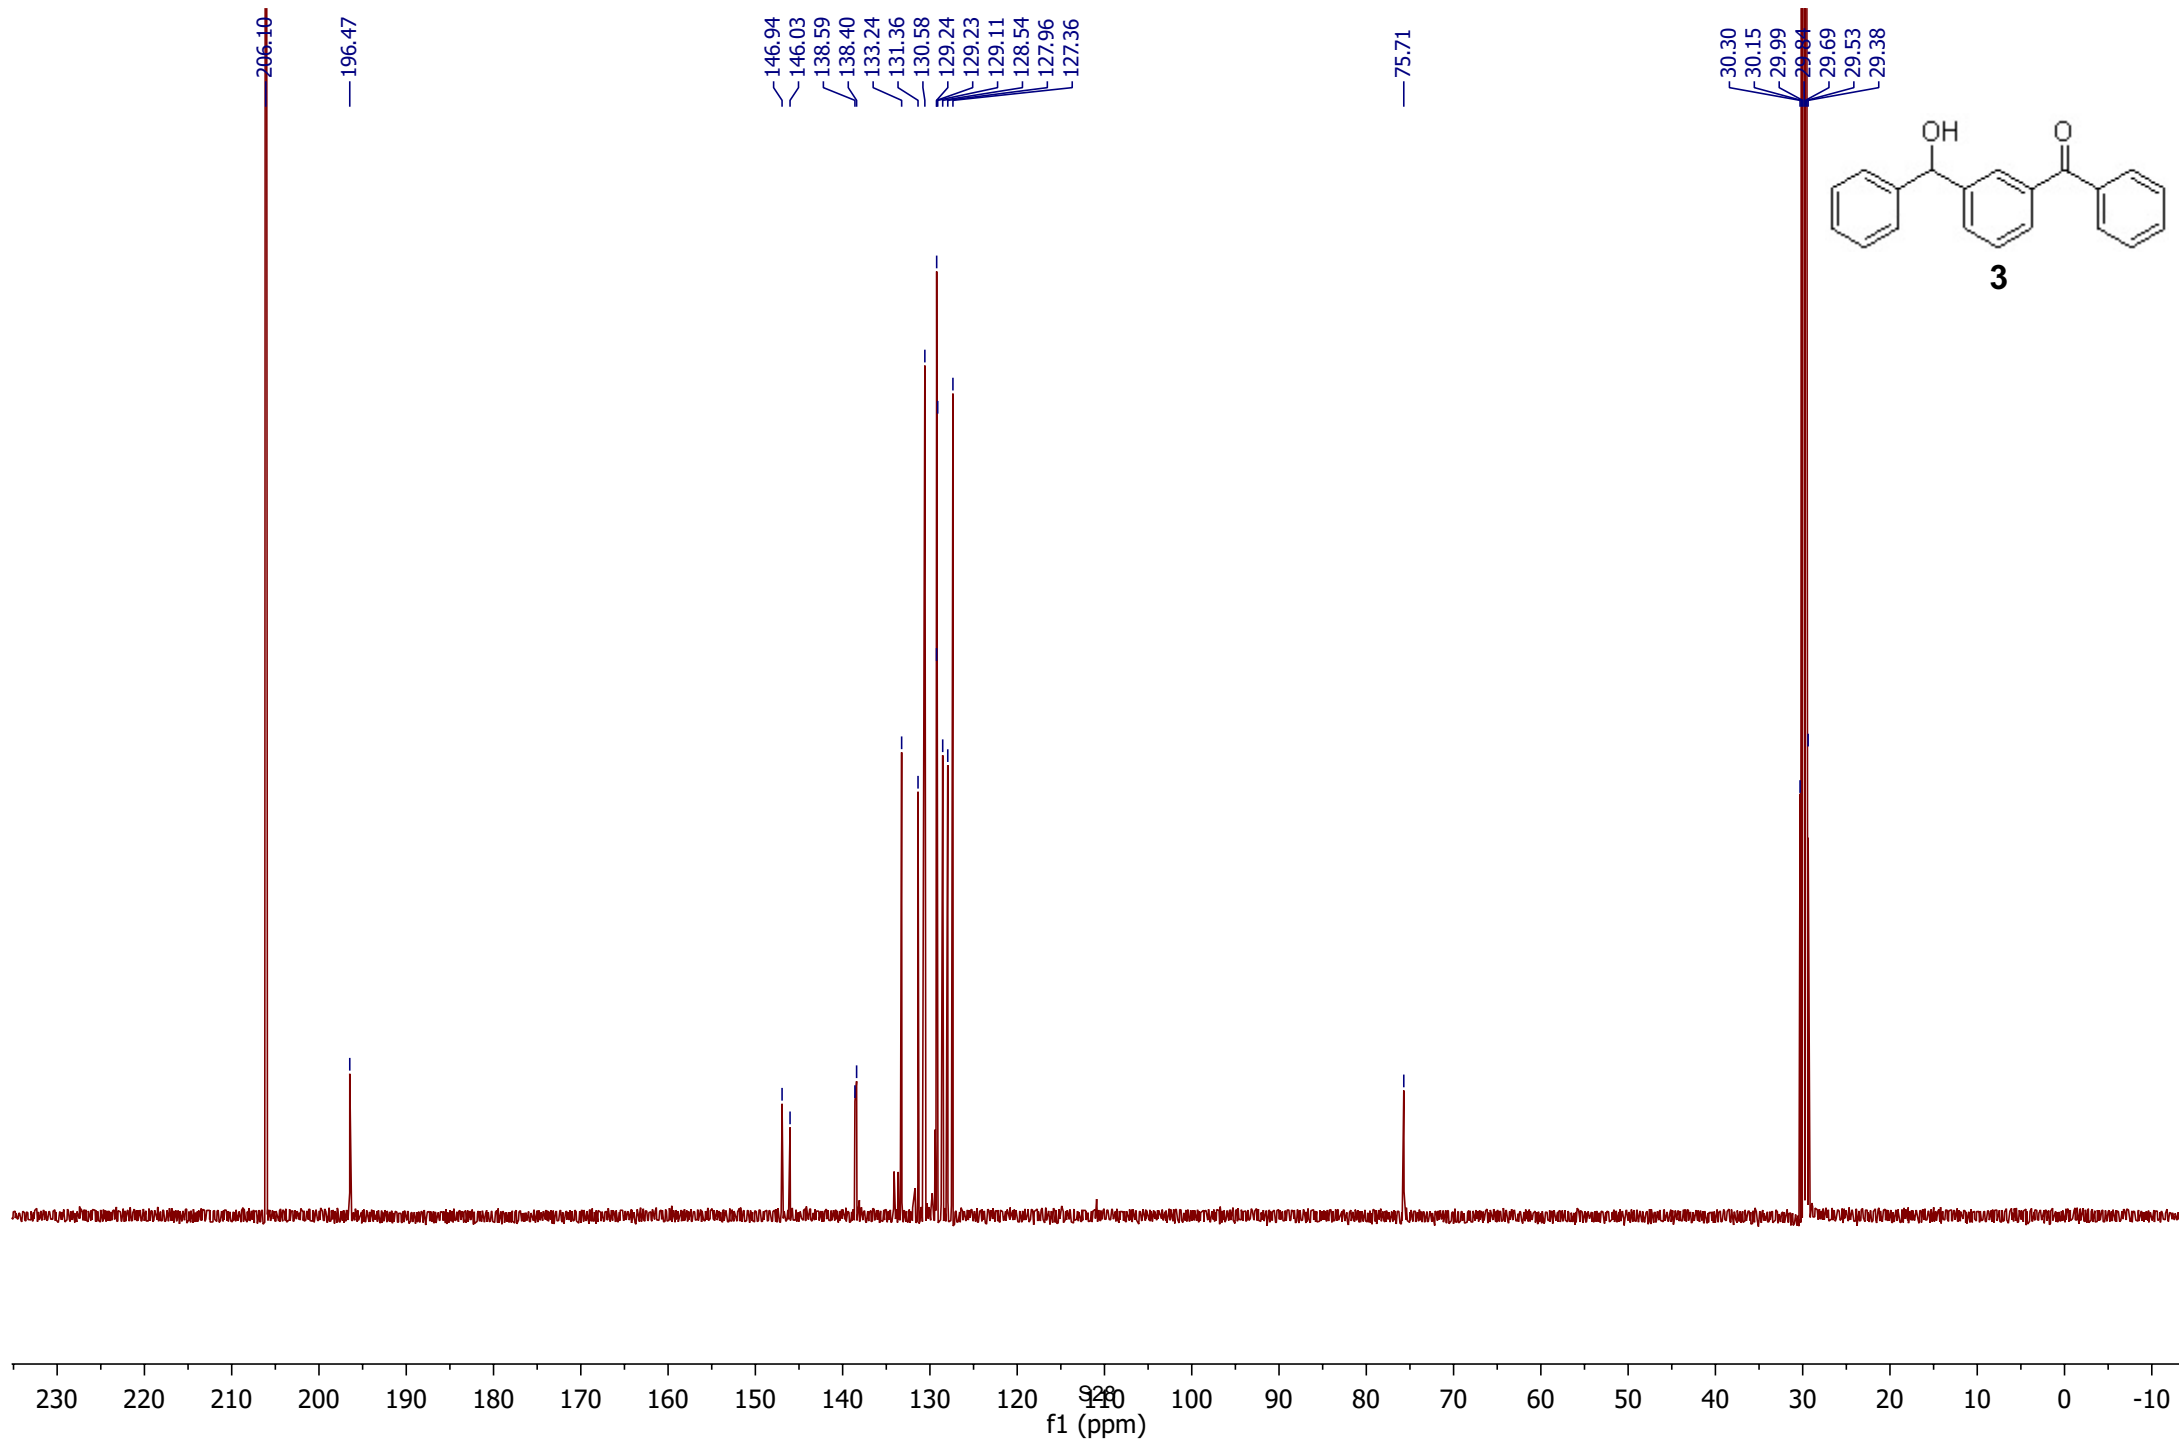

# HRMS(ESI) for Compound 3

C:\Xcalibur\...Erica\12-19-14\ENP\_IL\_16

12/19/2014 9:23:59 AM

ENP\_IL\_16 #238-257 RT: 2.62-2.78 AV: 20 NL: 9.69E7  
T: FTMS + p ESI Full ms [100.00-700.00]

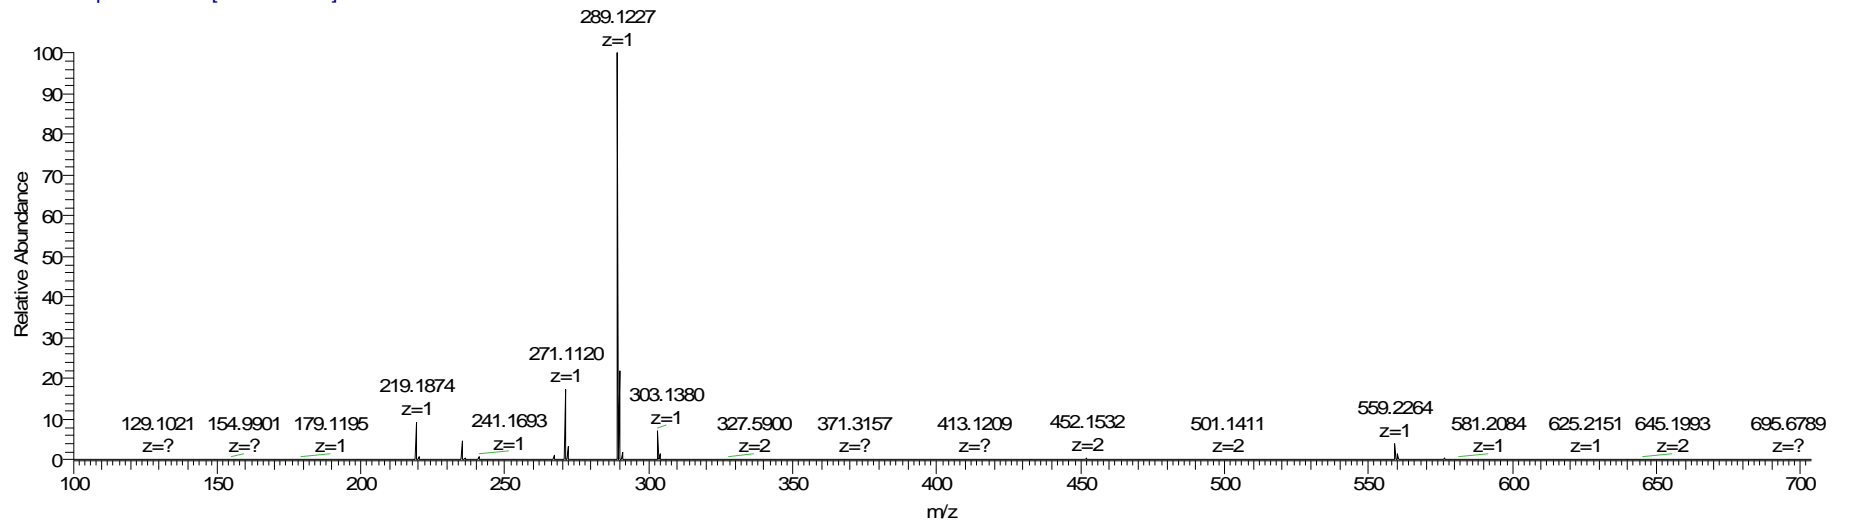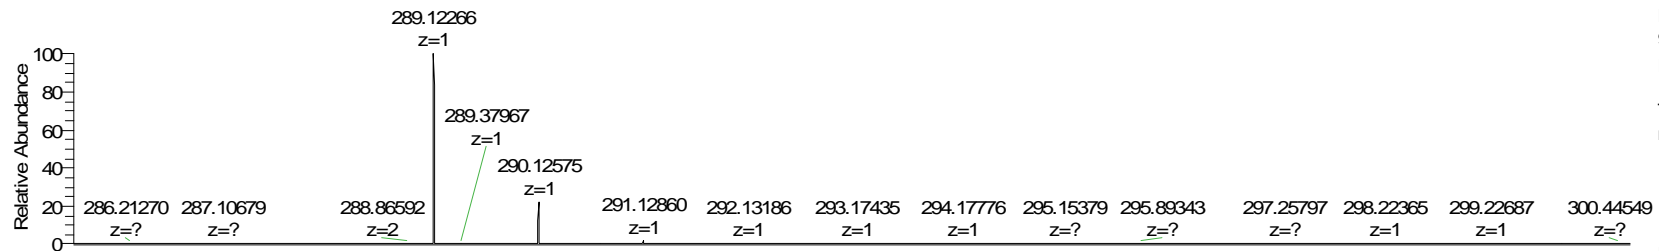

NL:  
9.69E7  
ENP\_IL\_16#238-257  
RT: 2.62-2.78 AV: 20  
T: FTMS + p ESI Full  
ms [100.00-700.00]

NL:  
8.01E5  
C20H16O2 +H  
C20H17O2  
pa Chrg 1

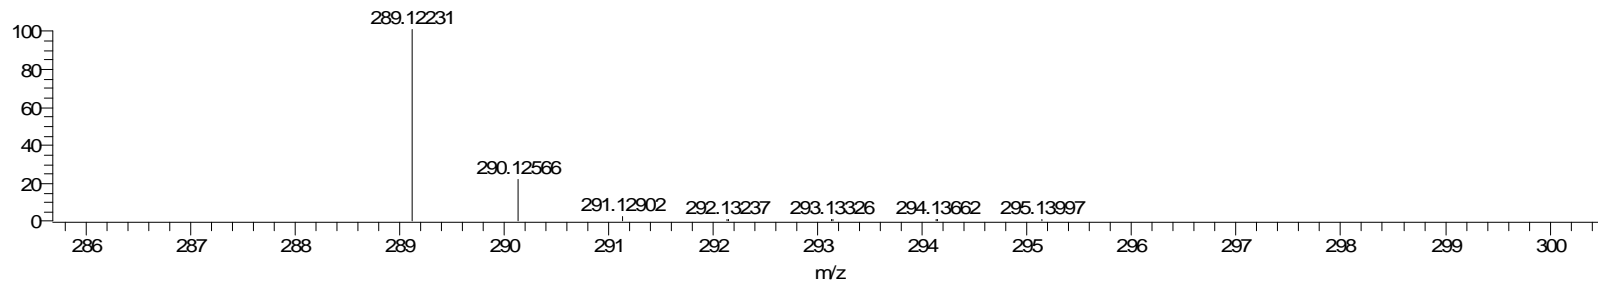

<sup>1</sup>H NMR (500 MHz, Acetone-d<sub>6</sub>) of Compound 4

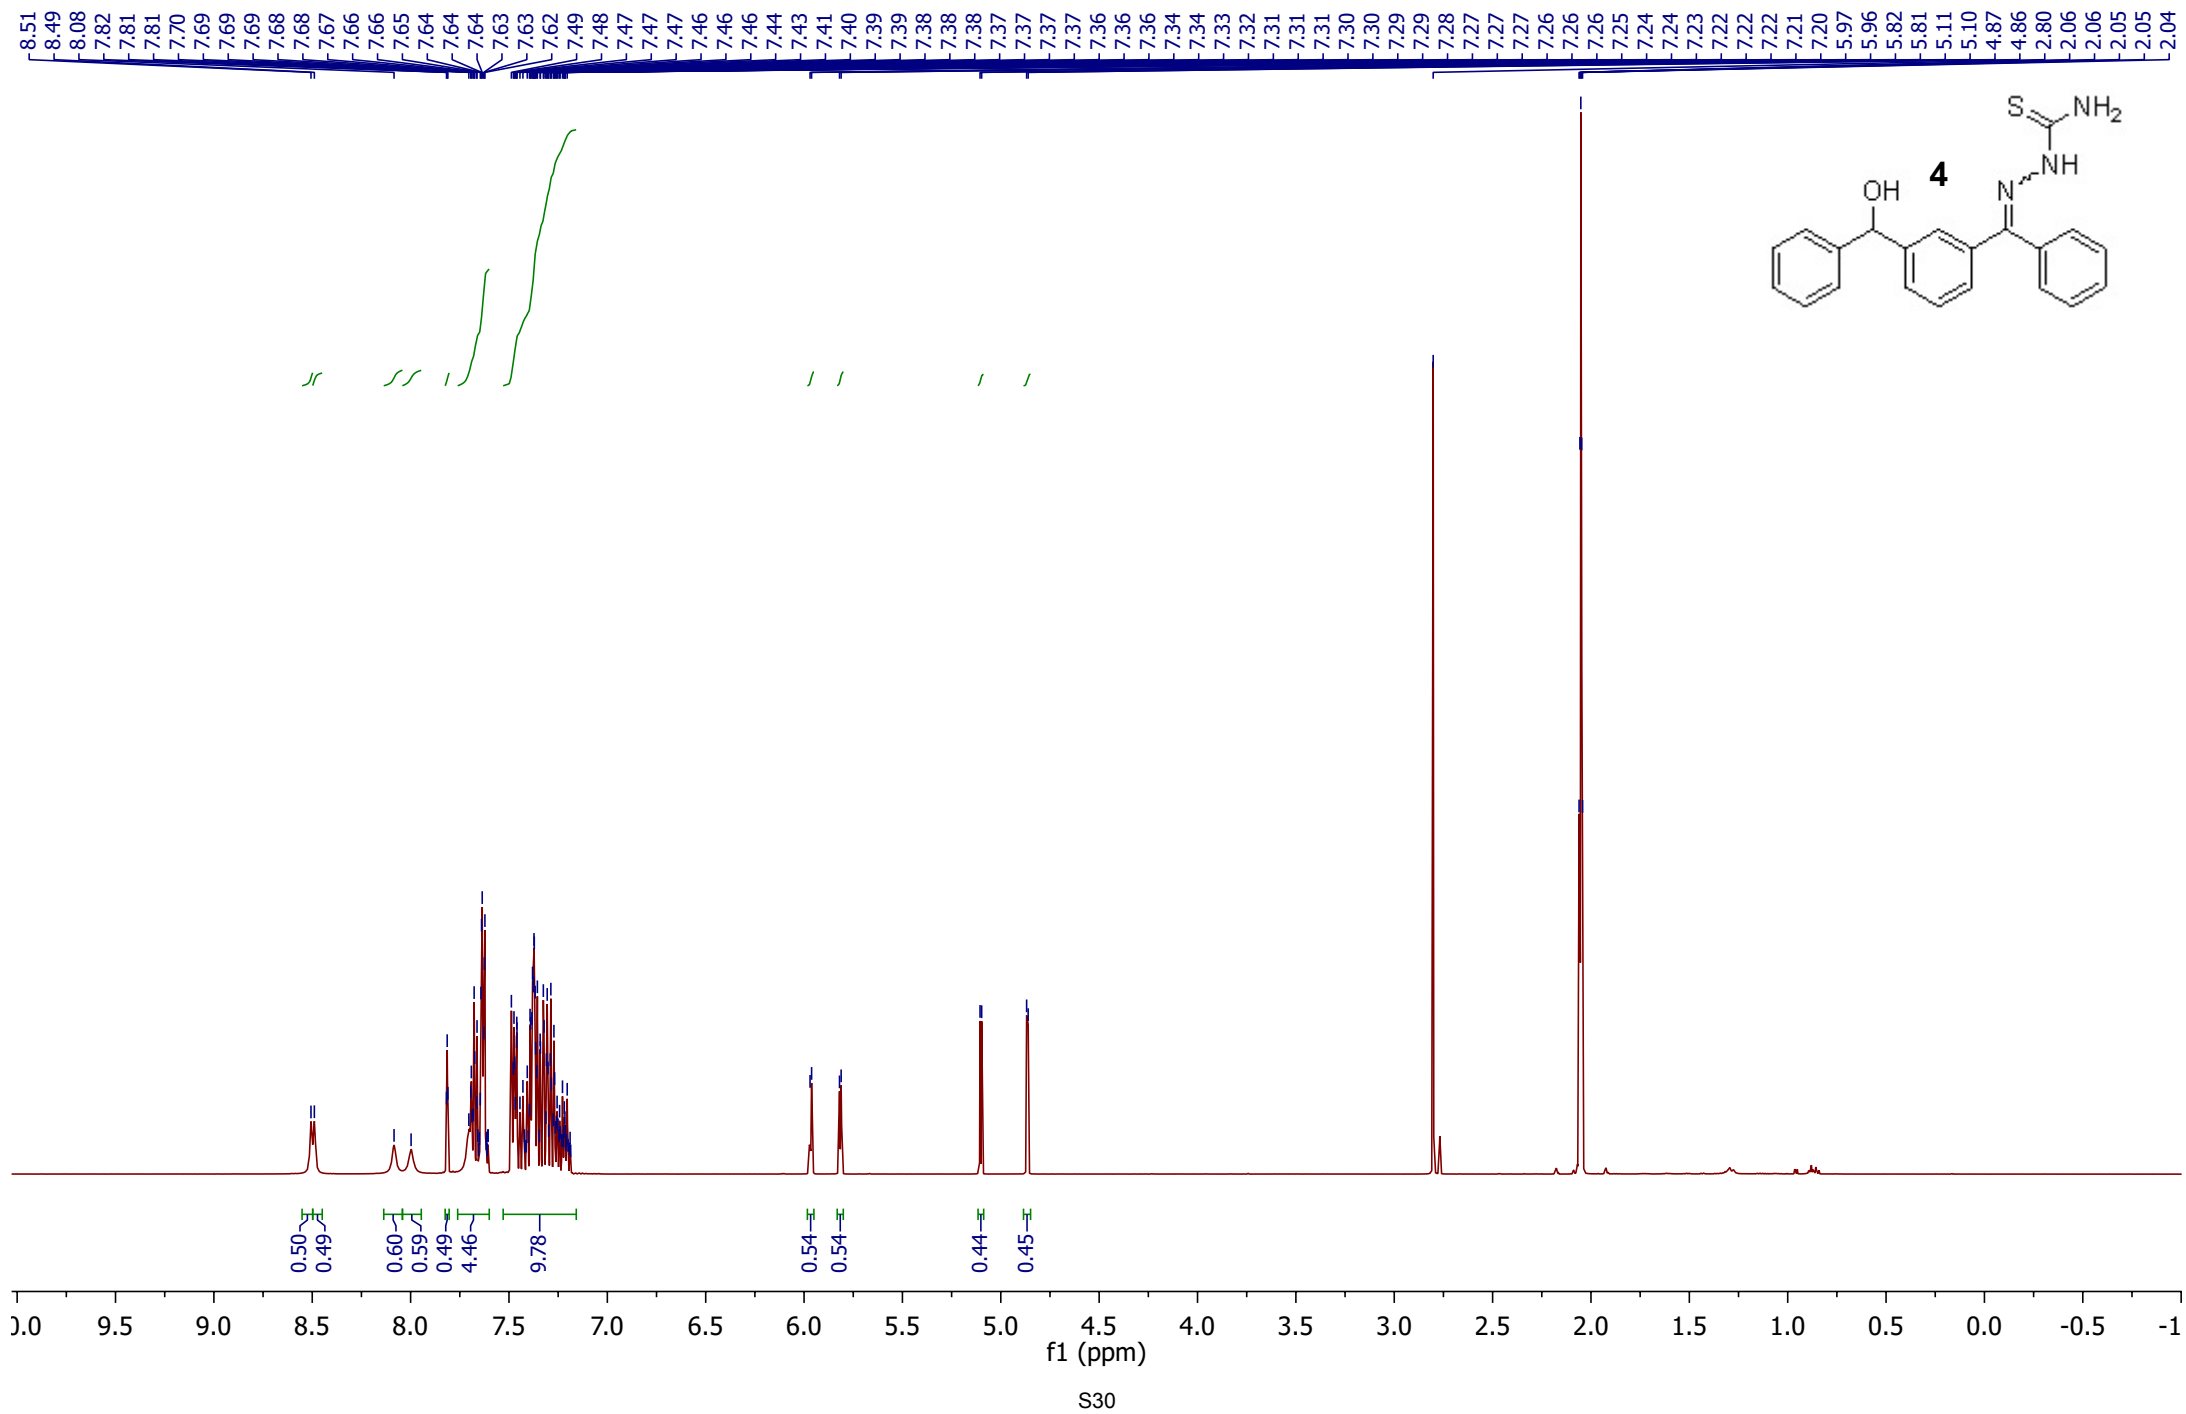

<sup>13</sup>C NMR (125 MHz, Acetone-d<sub>6</sub>) of Compound **4**

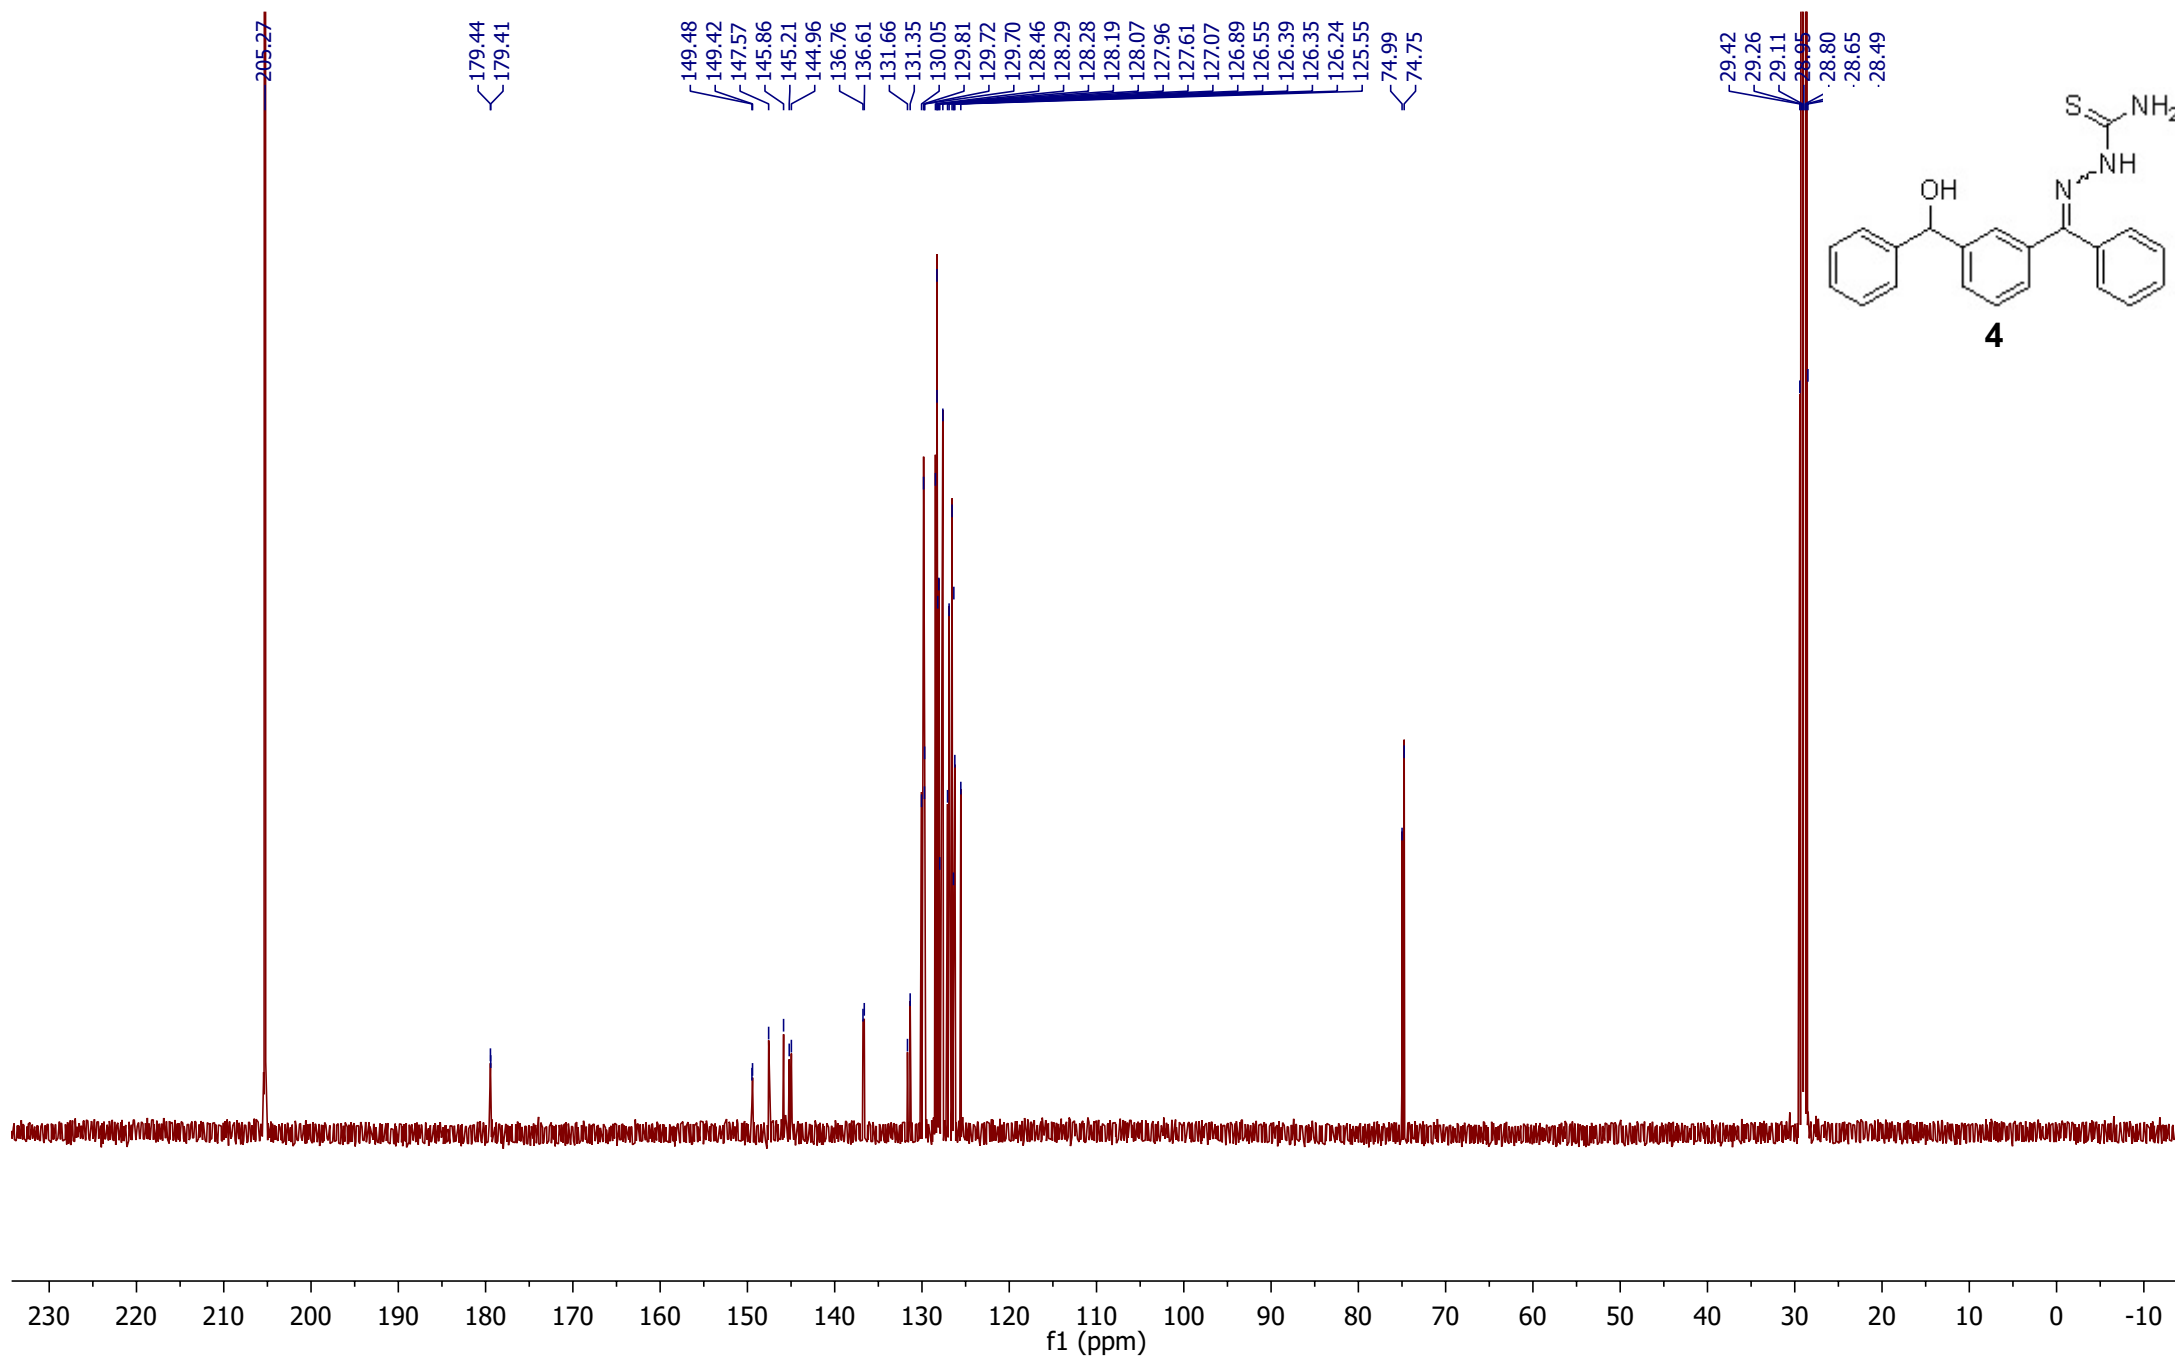

## HPLC trace for Compound 4

=====

Acq. Operator : ERICAP  
Acq. Instrument : Instrument 1 Location : -  
Injection Date : 4/23/2014 6:20:58 PM  
Acq. Method : C:\CHEM32\1\METHODS\GRAD 2 30-90 ACN.M  
Last changed : 4/23/2014 6:03:32 PM by ERICAP  
Analysis Method : C:\CHEM32\1\DATA\ERICAP\ENPII21000030.D\DA.M (GRAD 2 30-90 ACN.M)  
Last changed : 6/12/2014 10:09:58 PM by ERICAP  
(modified after loading)  
Sample Info : ENP-II-21

## Method:

0-25 Min. 30:70 to 90:10 ACN:Water  
25-30 min 90:10 ACN:Water

Two peaks observed in the HPLC traces are due to the presence of both E and Z geometrical isomers.

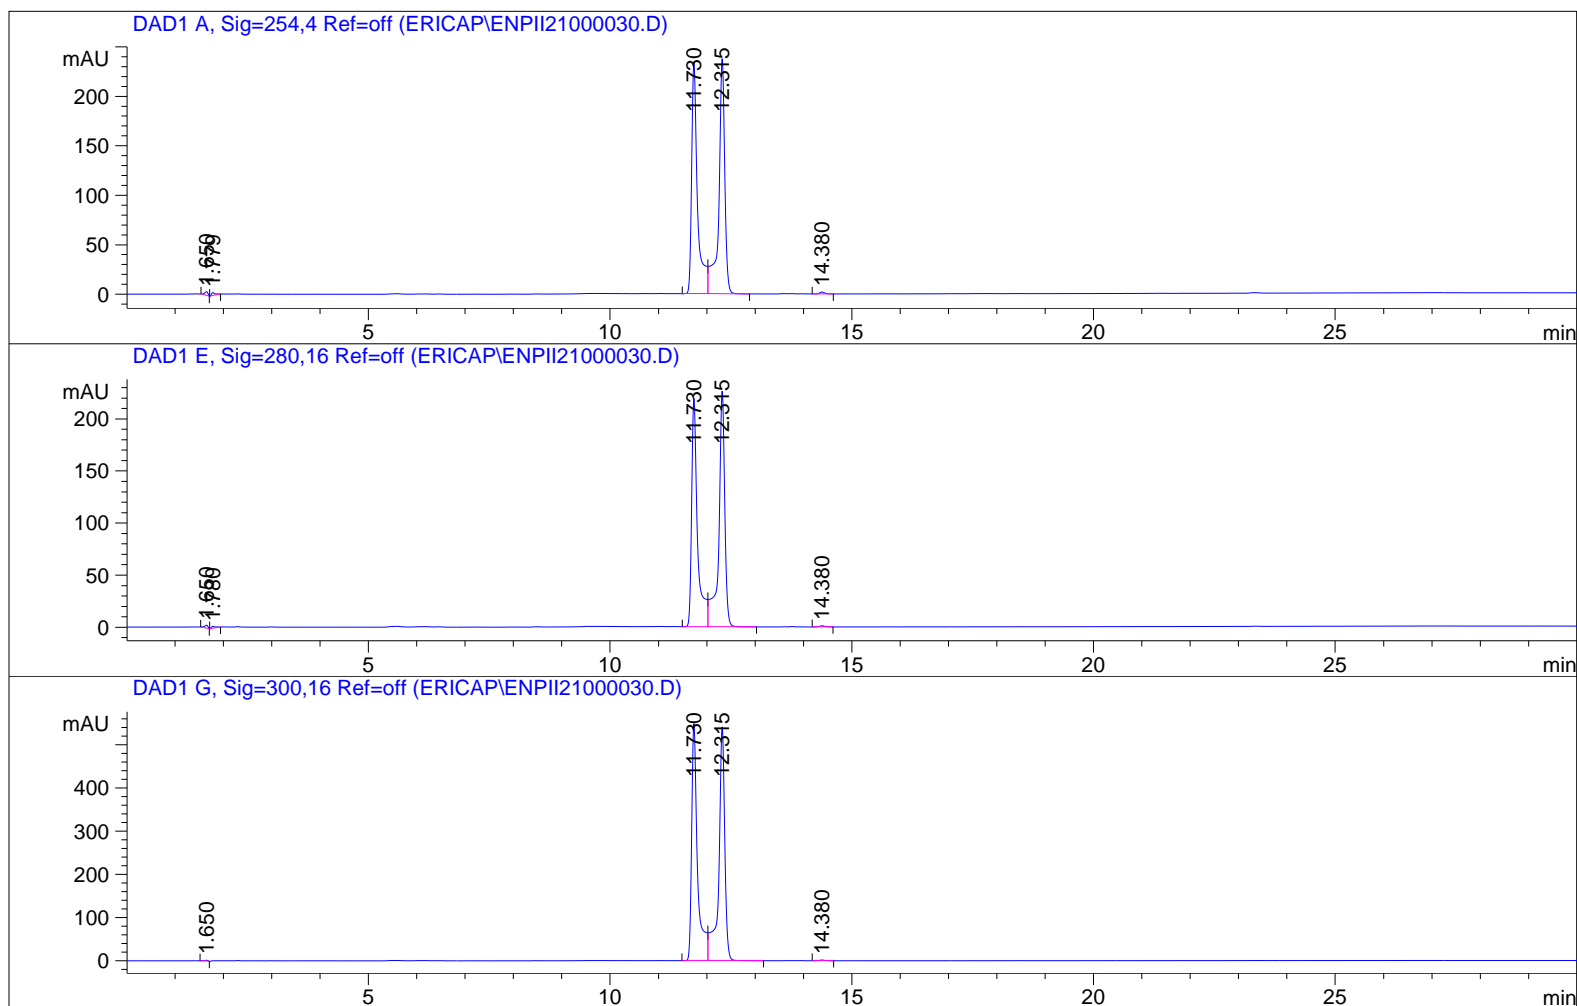



HPLC trace for Compound 4

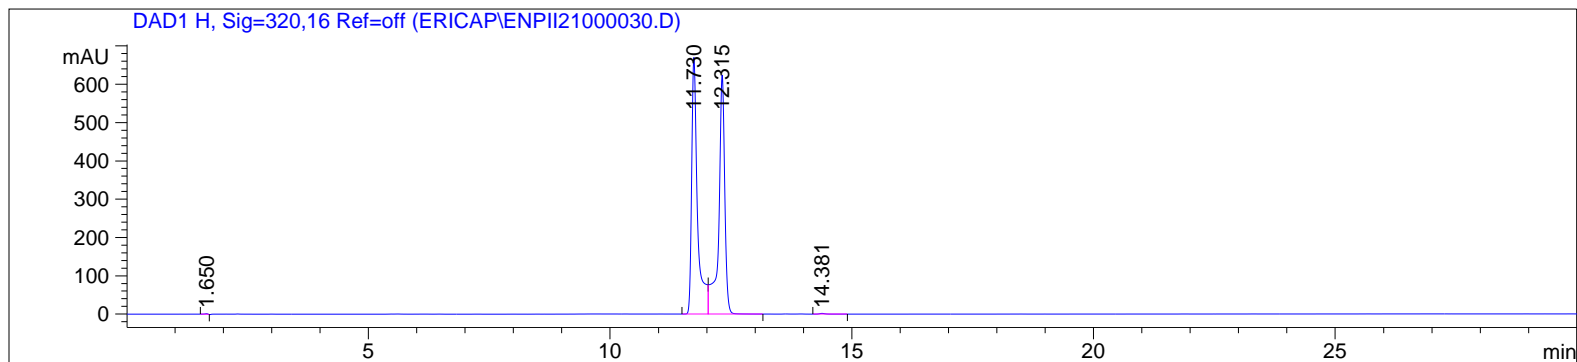

=====  
 Area Percent Report  
 =====

Sorted By : Signal  
 Multiplier : 1.0000  
 Dilution : 1.0000  
 Use Multiplier & Dilution Factor with ISTDs

Signal 1: DAD1 A, Sig=254,4 Ref=off

| Peak # | RetTime [min] | Type | Width [min] | Area [mAU*s] | Height [mAU] | Area %  |
|--------|---------------|------|-------------|--------------|--------------|---------|
| 1      | 1.650         | BB   | 0.0769      | 18.23187     | 3.87769      | 0.4449  |
| 2      | 1.779         | BB   | 0.0828      | 17.08805     | 3.07529      | 0.4170  |
| 3      | 11.730        | BV   | 0.1226      | 1977.19495   | 233.86279    | 48.2460 |
| 4      | 12.315        | VB   | 0.1256      | 2072.02637   | 238.03497    | 50.5600 |
| 5      | 14.380        | BB   | 0.1131      | 13.60941     | 1.86607      | 0.3321  |

Totals : 4098.15064 480.71681

Signal 2: DAD1 E, Sig=280,16 Ref=off

| Peak # | RetTime [min] | Type | Width [min] | Area [mAU*s] | Height [mAU] | Area %  |
|--------|---------------|------|-------------|--------------|--------------|---------|
| 1      | 1.650         | BB   | 0.0781      | 13.92746     | 2.89825      | 0.3603  |
| 2      | 1.780         | BB   | 0.0894      | 11.38207     | 1.85881      | 0.2945  |
| 3      | 11.730        | BV   | 0.1227      | 1857.43726   | 219.44960    | 48.0557 |
| 4      | 12.315        | VB   | 0.1256      | 1974.17249   | 226.70097    | 51.0759 |
| 5      | 14.380        | BB   | 0.1116      | 8.25262      | 1.12419      | 0.2135  |

Totals : 3865.17190 452.03182

Signal 3: DAD1 G, Sig=300,16 Ref=off

| Peak # | RetTime [min] | Type | Width [min] | Area [mAU*s] | Height [mAU] | Area %  |
|--------|---------------|------|-------------|--------------|--------------|---------|
| 1      | 1.650         | BB   | 0.0803      | 10.63423     | 2.12782      | 0.1132  |
| 2      | 11.730        | BV   | 0.1226      | 4635.96777   | 548.51636    | 49.3507 |
| 3      | 12.315        | VB   | 0.1259      | 4735.43945   | 541.91022    | 50.4096 |

HPLC trace for Compound 4

| Peak # | RetTime [min] | Type | Width [min] | Area [mAU*s] | Height [mAU] | Area % |
|--------|---------------|------|-------------|--------------|--------------|--------|
| 4      | 14.380        | BB   | 0.1111      | 11.88297     | 1.62996      | 0.1265 |

Totals : 9393.92443 1094.18435

Signal 4: DAD1 H, Sig=320,16 Ref=off

| Peak # | RetTime [min] | Type | Width [min] | Area [mAU*s] | Height [mAU] | Area %  |
|--------|---------------|------|-------------|--------------|--------------|---------|
| 1      | 1.650         | BB   | 0.0794      | 9.00574      | 1.83150      | 0.0808  |
| 2      | 11.730        | BV   | 0.1223      | 5650.26221   | 670.28705    | 50.6806 |
| 3      | 12.315        | VB   | 0.1262      | 5475.74316   | 625.02753    | 49.1153 |
| 4      | 14.381        | BB   | 0.1141      | 13.74645     | 1.86303      | 0.1233  |

Totals : 1.11488e4 1299.00910

=====  
\*\*\* End of Report \*\*\*

# HRMS(ESI) for Compound 4

C:\Xcalibur\...ENP\_IL\_21\_Orbi+ESI

1/13/2015 11:19:57 PM

ENP\_IL\_21\_Orbi+ESI #2 RT: 0.02 AV: 1 NL: 6.43E6  
T: FTMS + p ESI Full ms [100.00-1000.00]

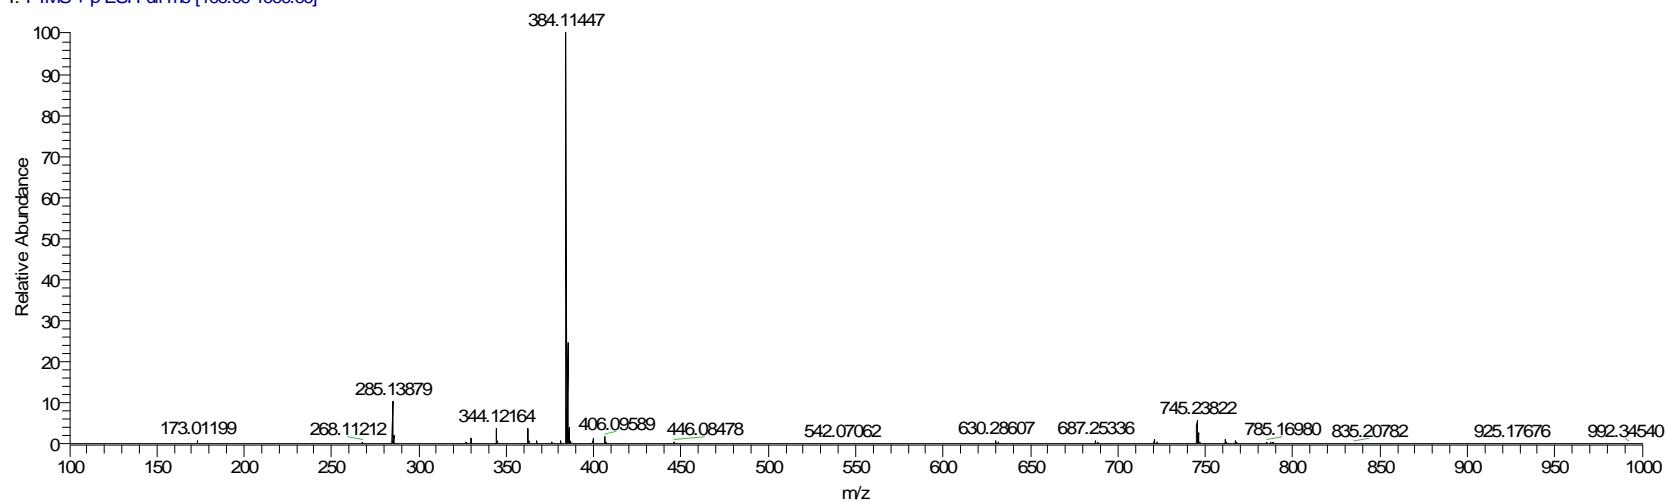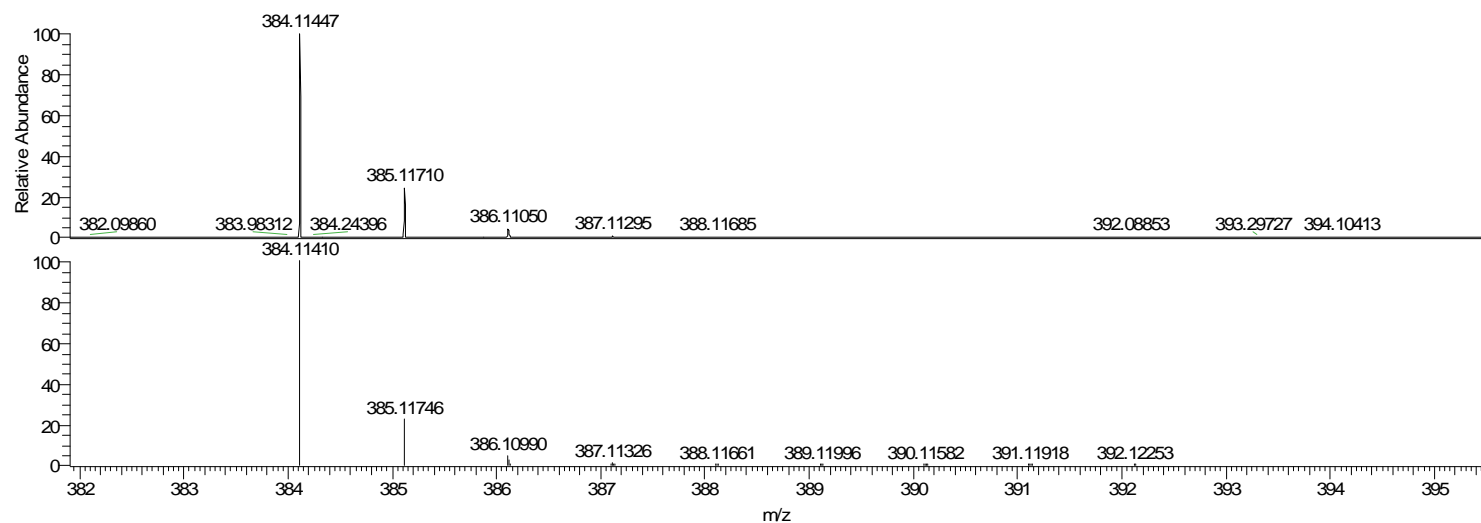

NL:  
6.43E6  
ENP\_IL\_21\_Orbi+  
ESI#2 RT: 0.02 AV:  
1 T: FTMS + p ESI  
Full ms  
[100.00-1000.00]

NL:  
7.46E5  
C<sub>21</sub>H<sub>9</sub>N<sub>3</sub>OS +Na:  
C<sub>21</sub>H<sub>9</sub>N<sub>3</sub>O<sub>1</sub>S<sub>1</sub>Na<sub>1</sub>  
pa Chrg 1

<sup>1</sup>H NMR (500 MHz, CDCl<sub>3</sub>) of Compound **5**

8.13  
8.13  
8.13  
8.13  
8.01  
8.00  
7.99  
7.99  
7.88  
7.88  
7.87  
7.87  
7.86  
7.86  
7.86  
7.85  
7.85  
7.66  
7.64  
7.63  
7.26  
7.21  
7.20  
7.20  
7.19  
7.19  
7.18  
7.18  
7.17  
7.17  
7.16

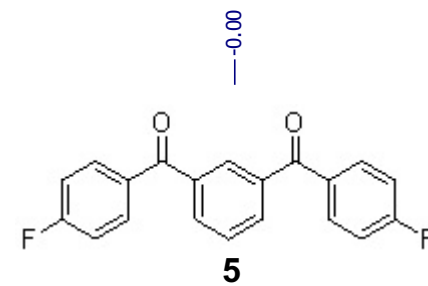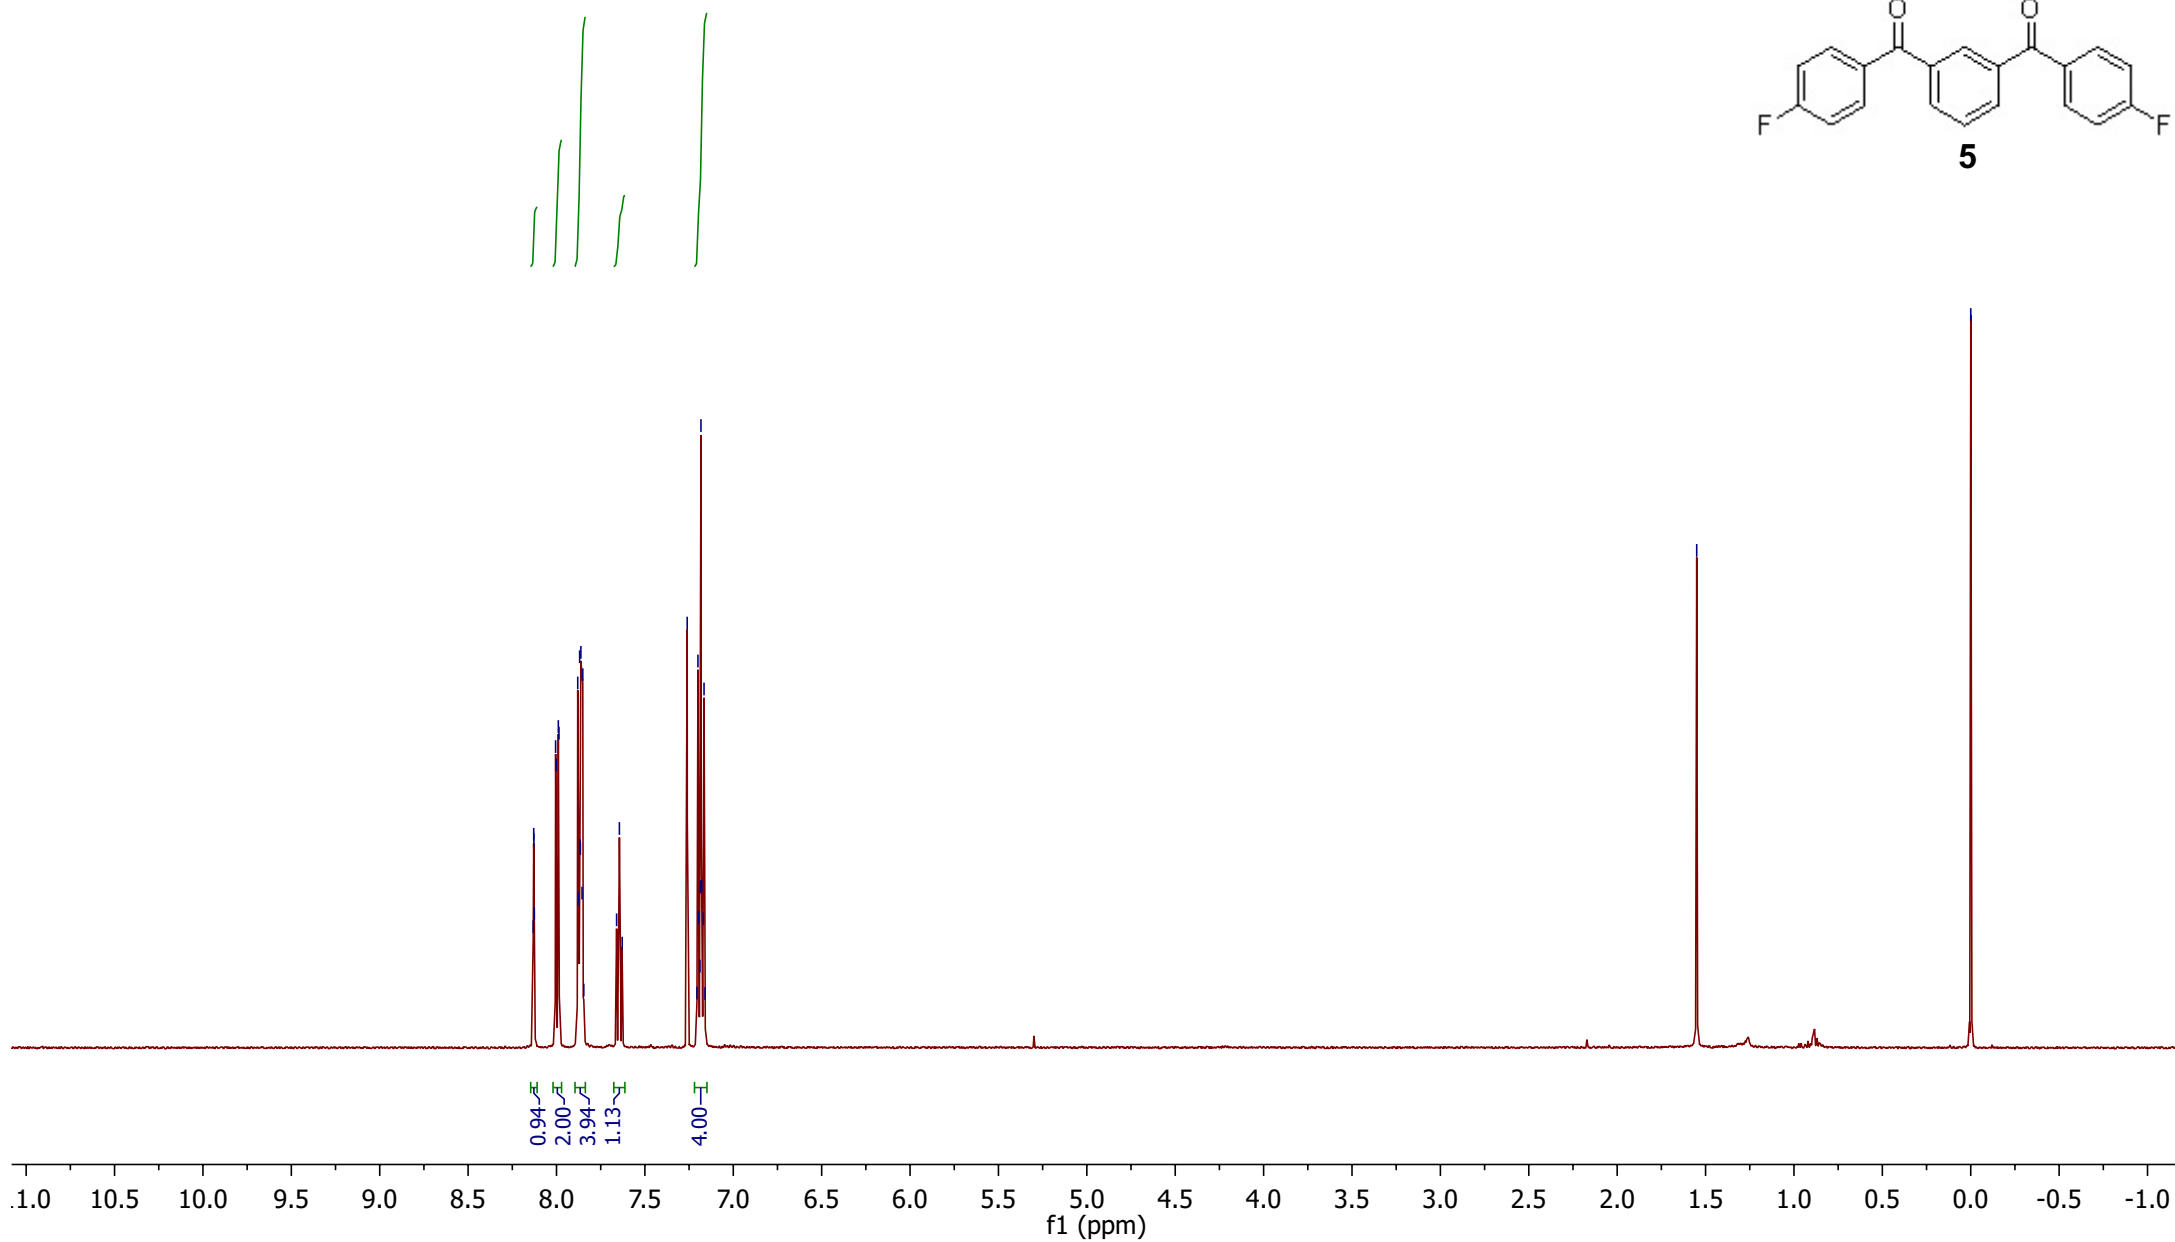

<sup>13</sup>C NMR (125 MHz, CDCl<sub>3</sub>) of Compound **5**

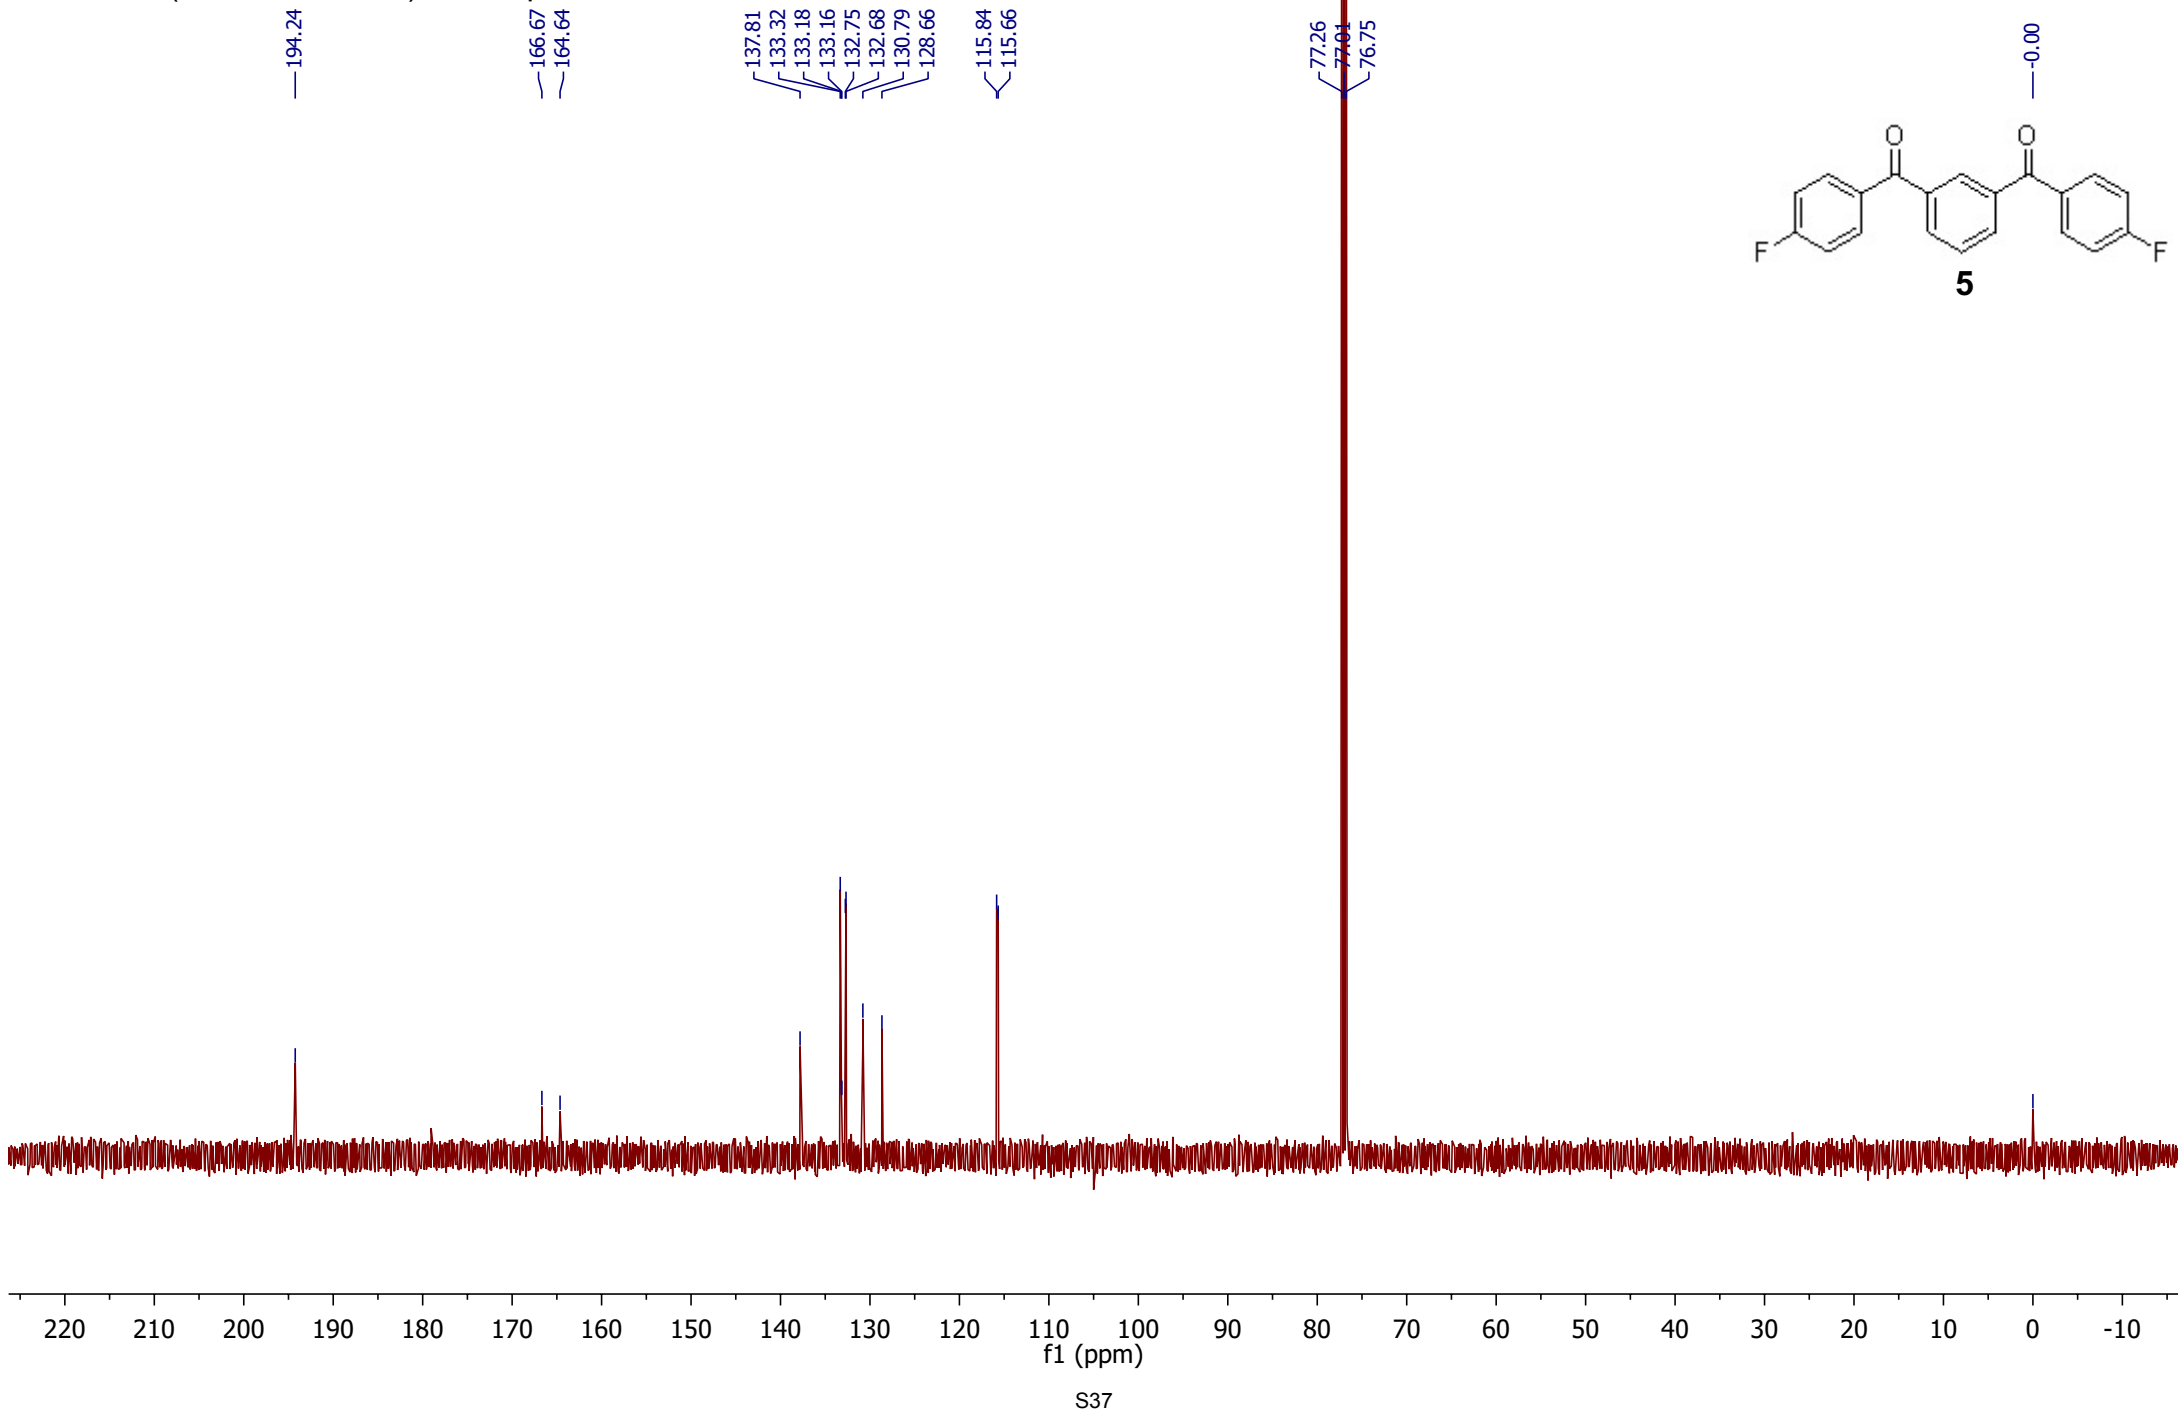

$^{19}\text{F}$  NMR (470 MHz,  $\text{CDCl}_3$ ) of Compound **5**

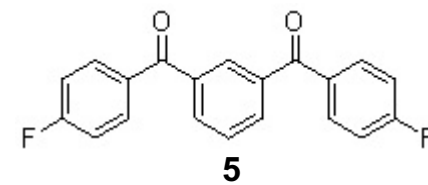

-104.89  
-104.90  
-104.91  
-104.91  
-104.92  
-104.92  
-104.93  
-104.93  
-104.95

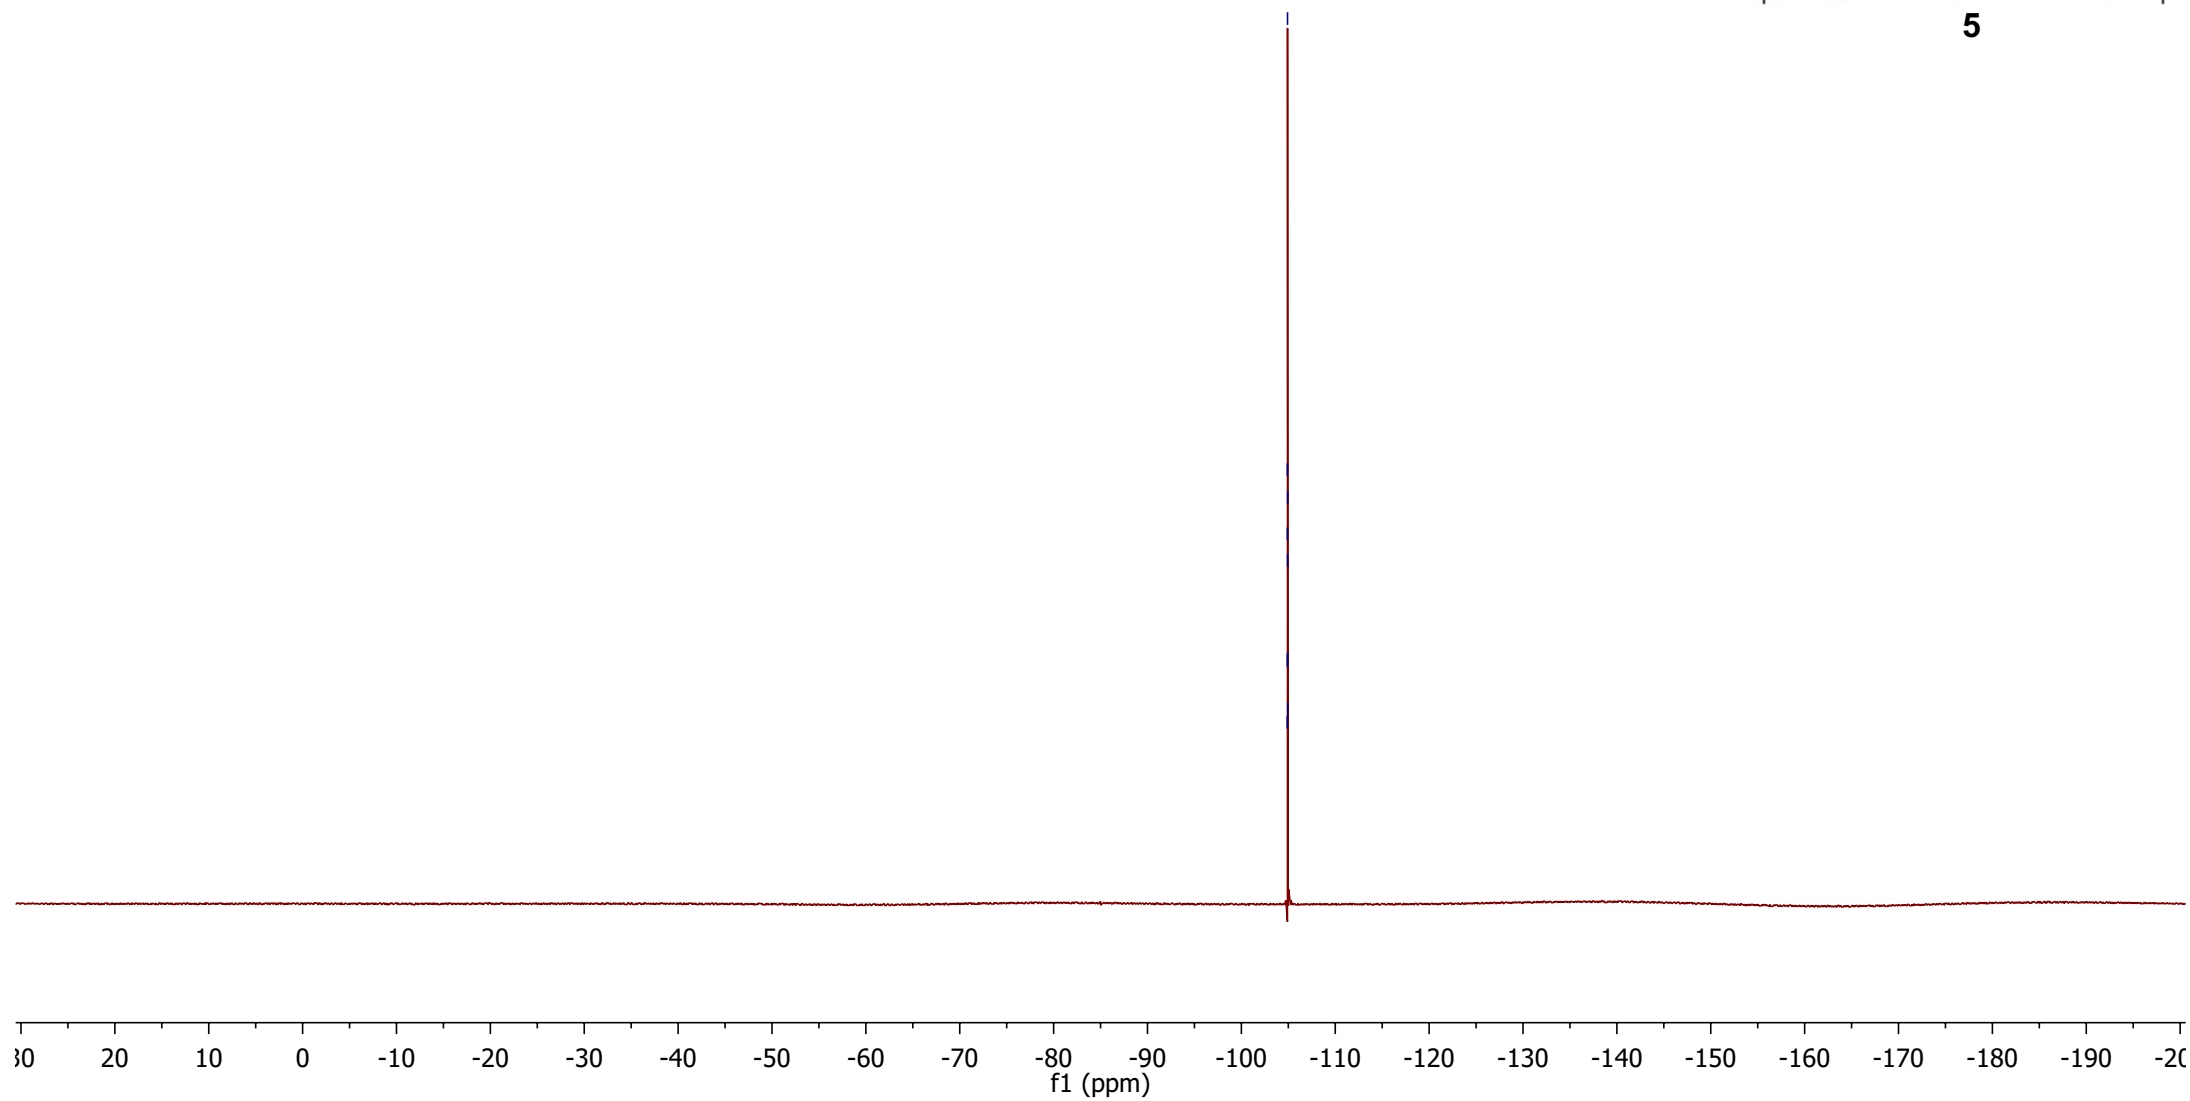

# HRMS (ESI) for Compound 5

C:\Xcalibur\...\SJL\_III\_155\_Orbi\_+ESI

12/30/2014 9:09:59 PM

SJL\_III\_155\_Orbi\_+ESI #10 RT: 0.13 AV: 1 NL: 4.96E6  
T: FTMS + c ESI Full ms [100.00-2000.00]

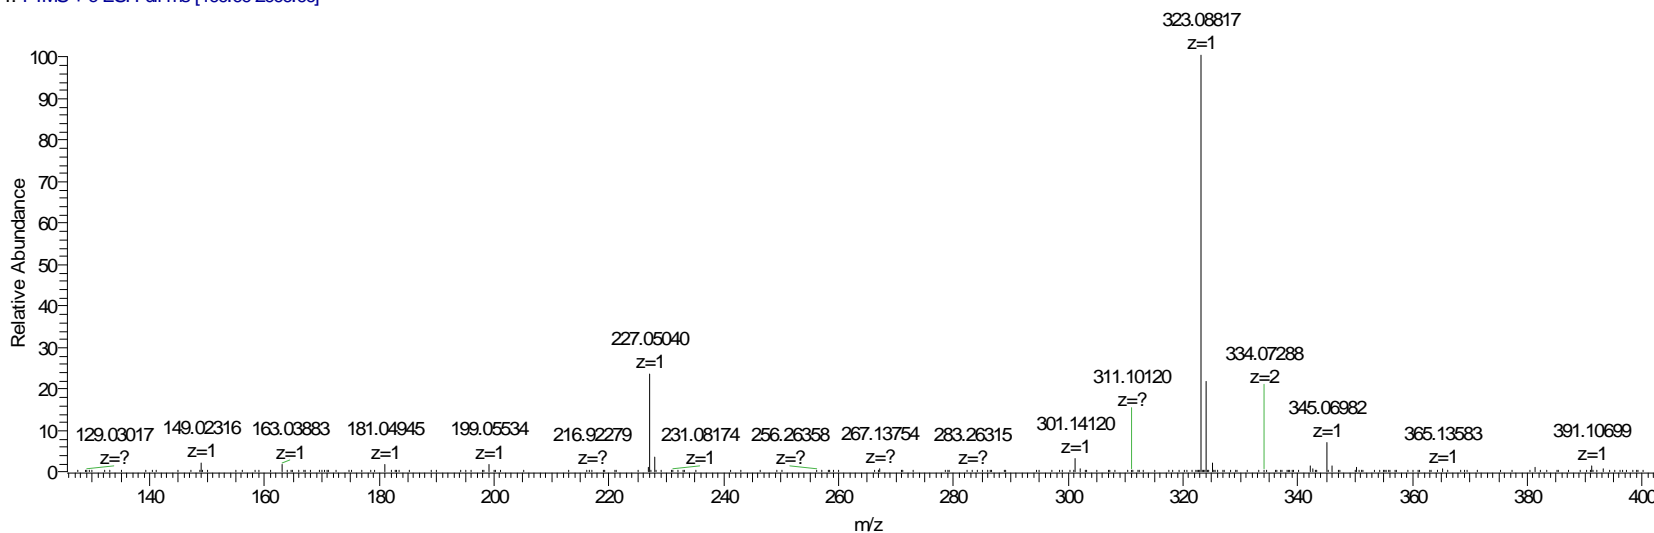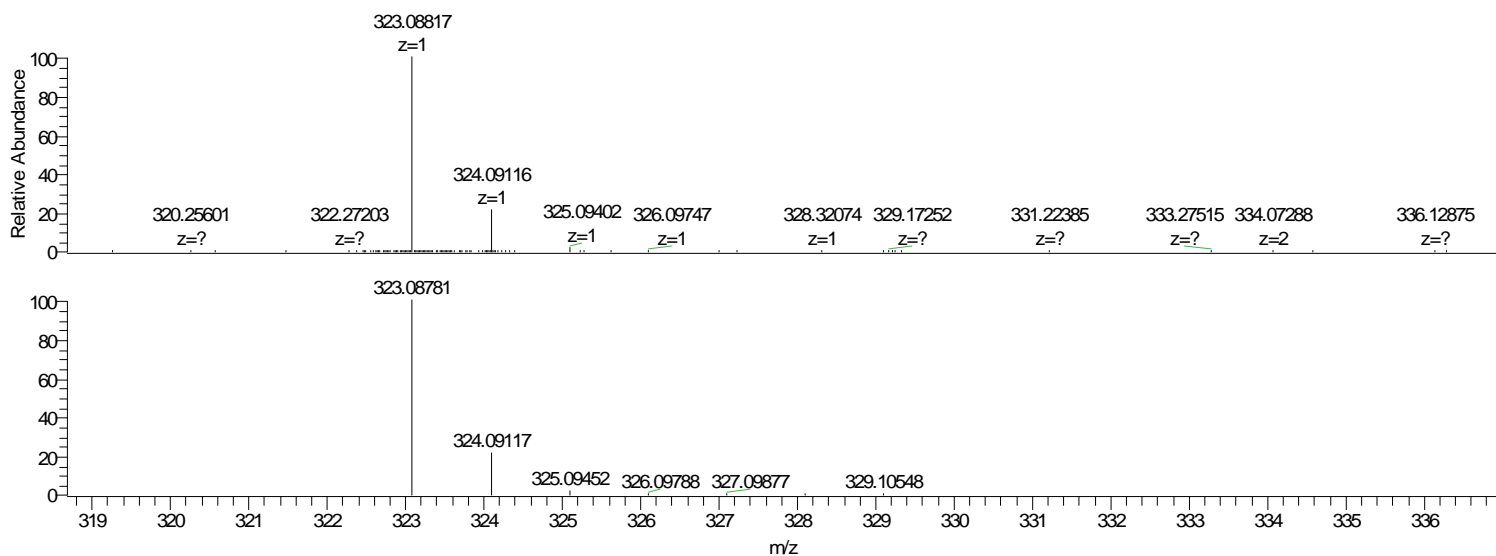

NL:  
4.96E6  
SJL\_III\_155\_Orbi\_+  
ES#10 RT: 0.13 AV:  
1 T: FTMS + c ESI  
Full ms  
[100.00-2000.00]

NL:  
8.01E5  
C<sub>20</sub>H<sub>16</sub>F<sub>2</sub>O<sub>2</sub>+H  
C<sub>20</sub>H<sub>16</sub>F<sub>2</sub>O<sub>2</sub>  
pa Chrg 1

<sup>1</sup>H NMR (500 MHz, DMSO-d<sub>6</sub>) of Compound **6**

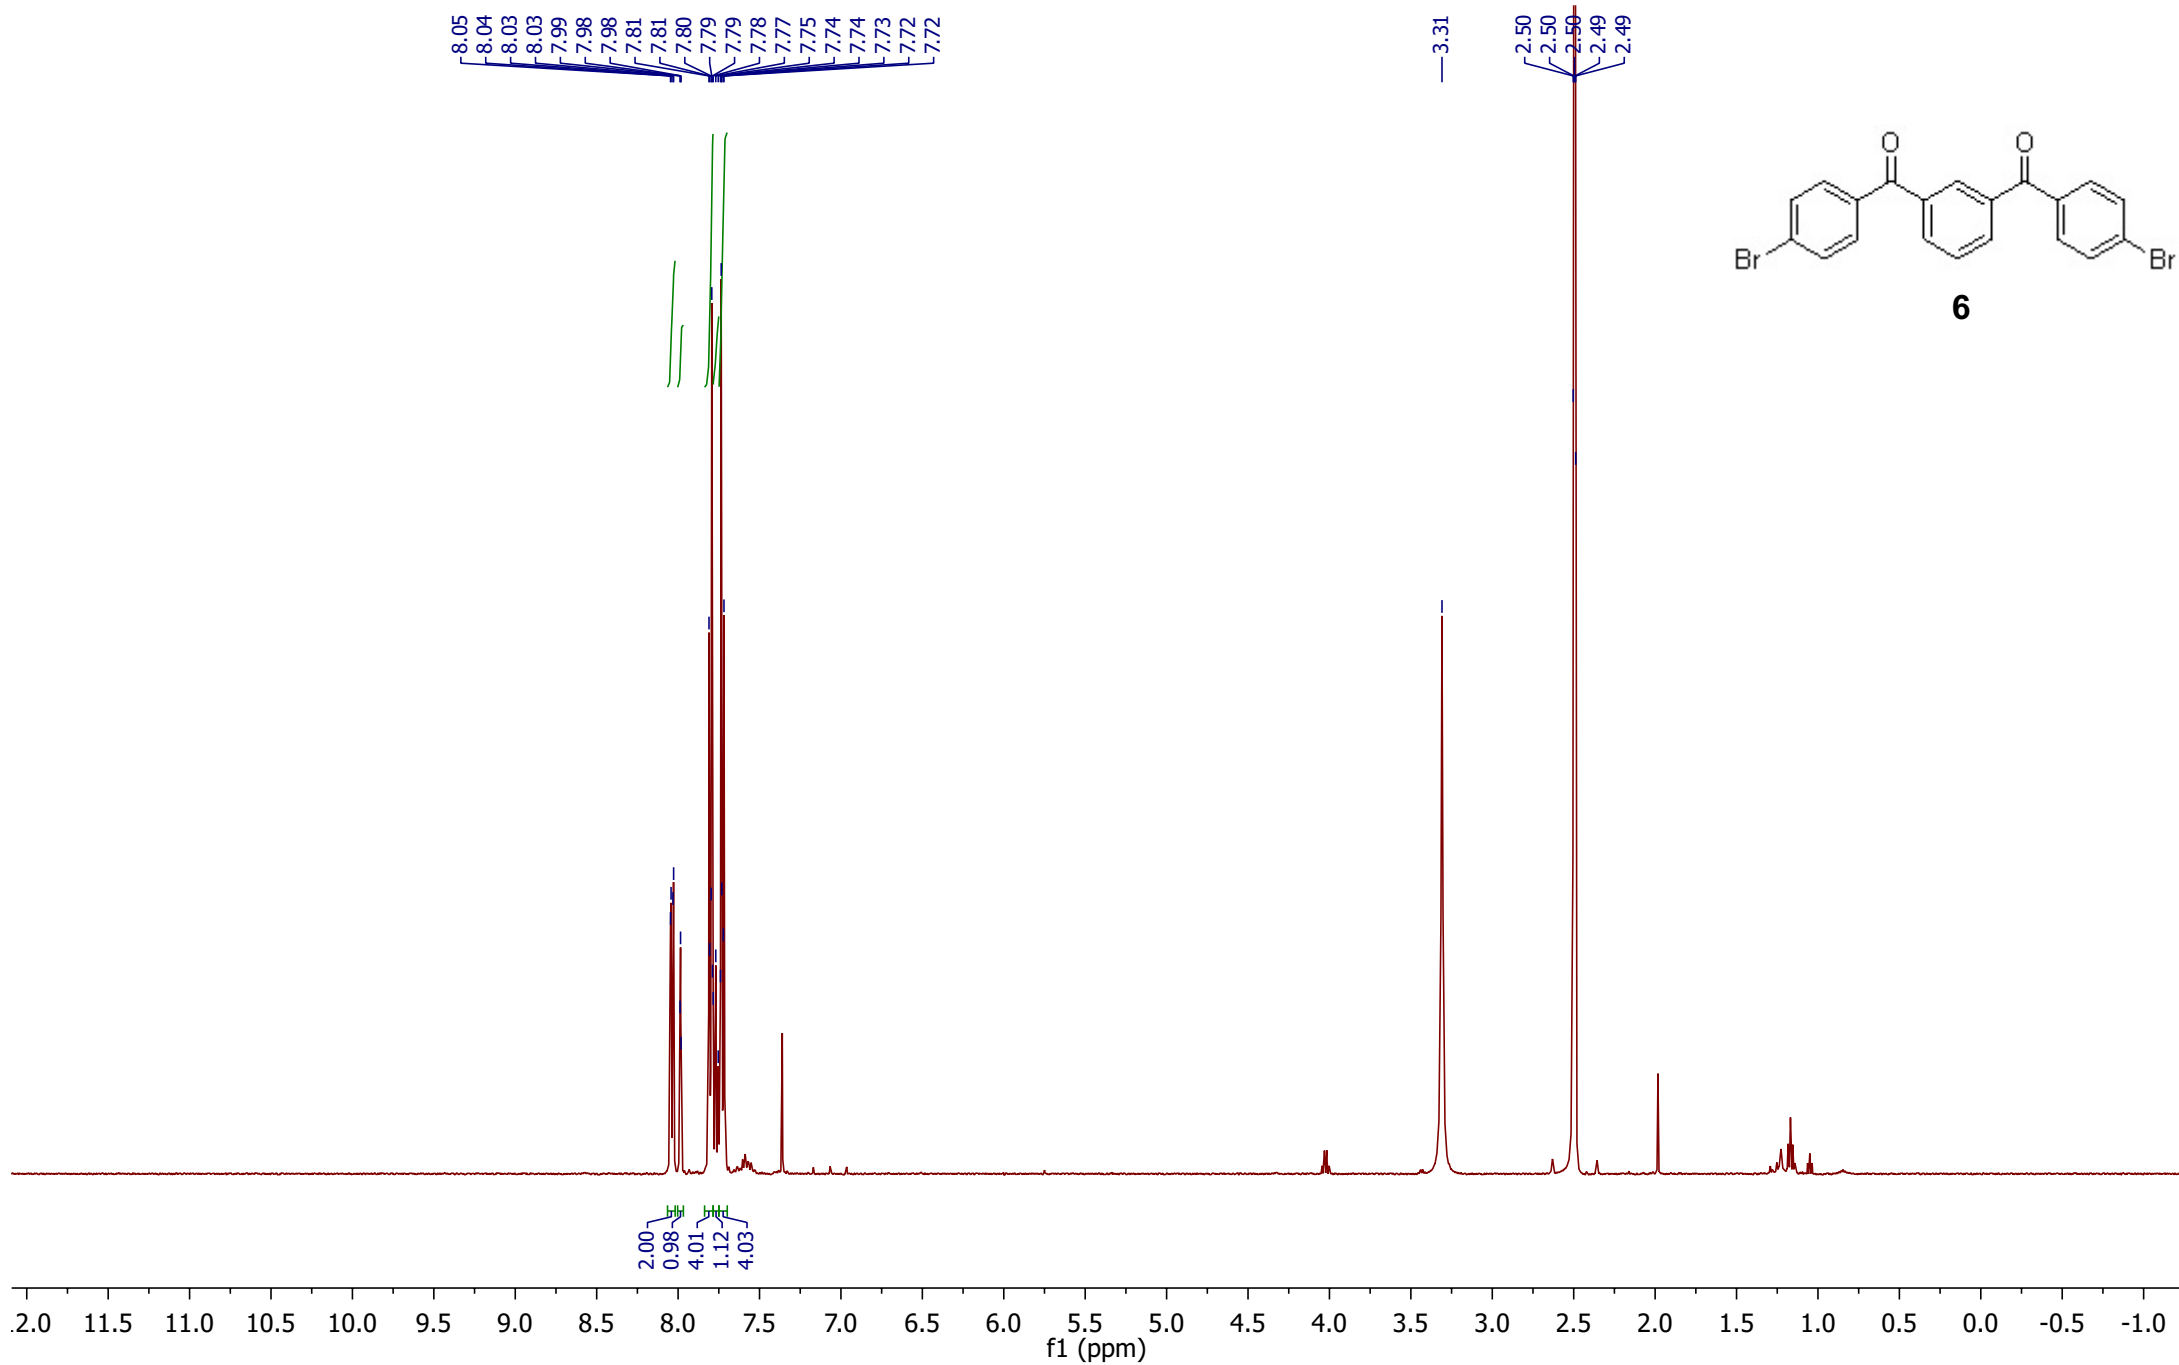



$^{13}\text{C}$  NMR (125 MHz,  $\text{DMSO-d}_6$ ) of Compound **6**

— 194.08

136.78  
135.52  
133.51  
131.75  
131.72  
130.44  
129.24  
127.10

40.02  
39.85  
39.69  
39.52  
39.35  
39.19  
39.02

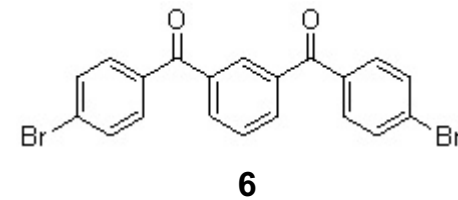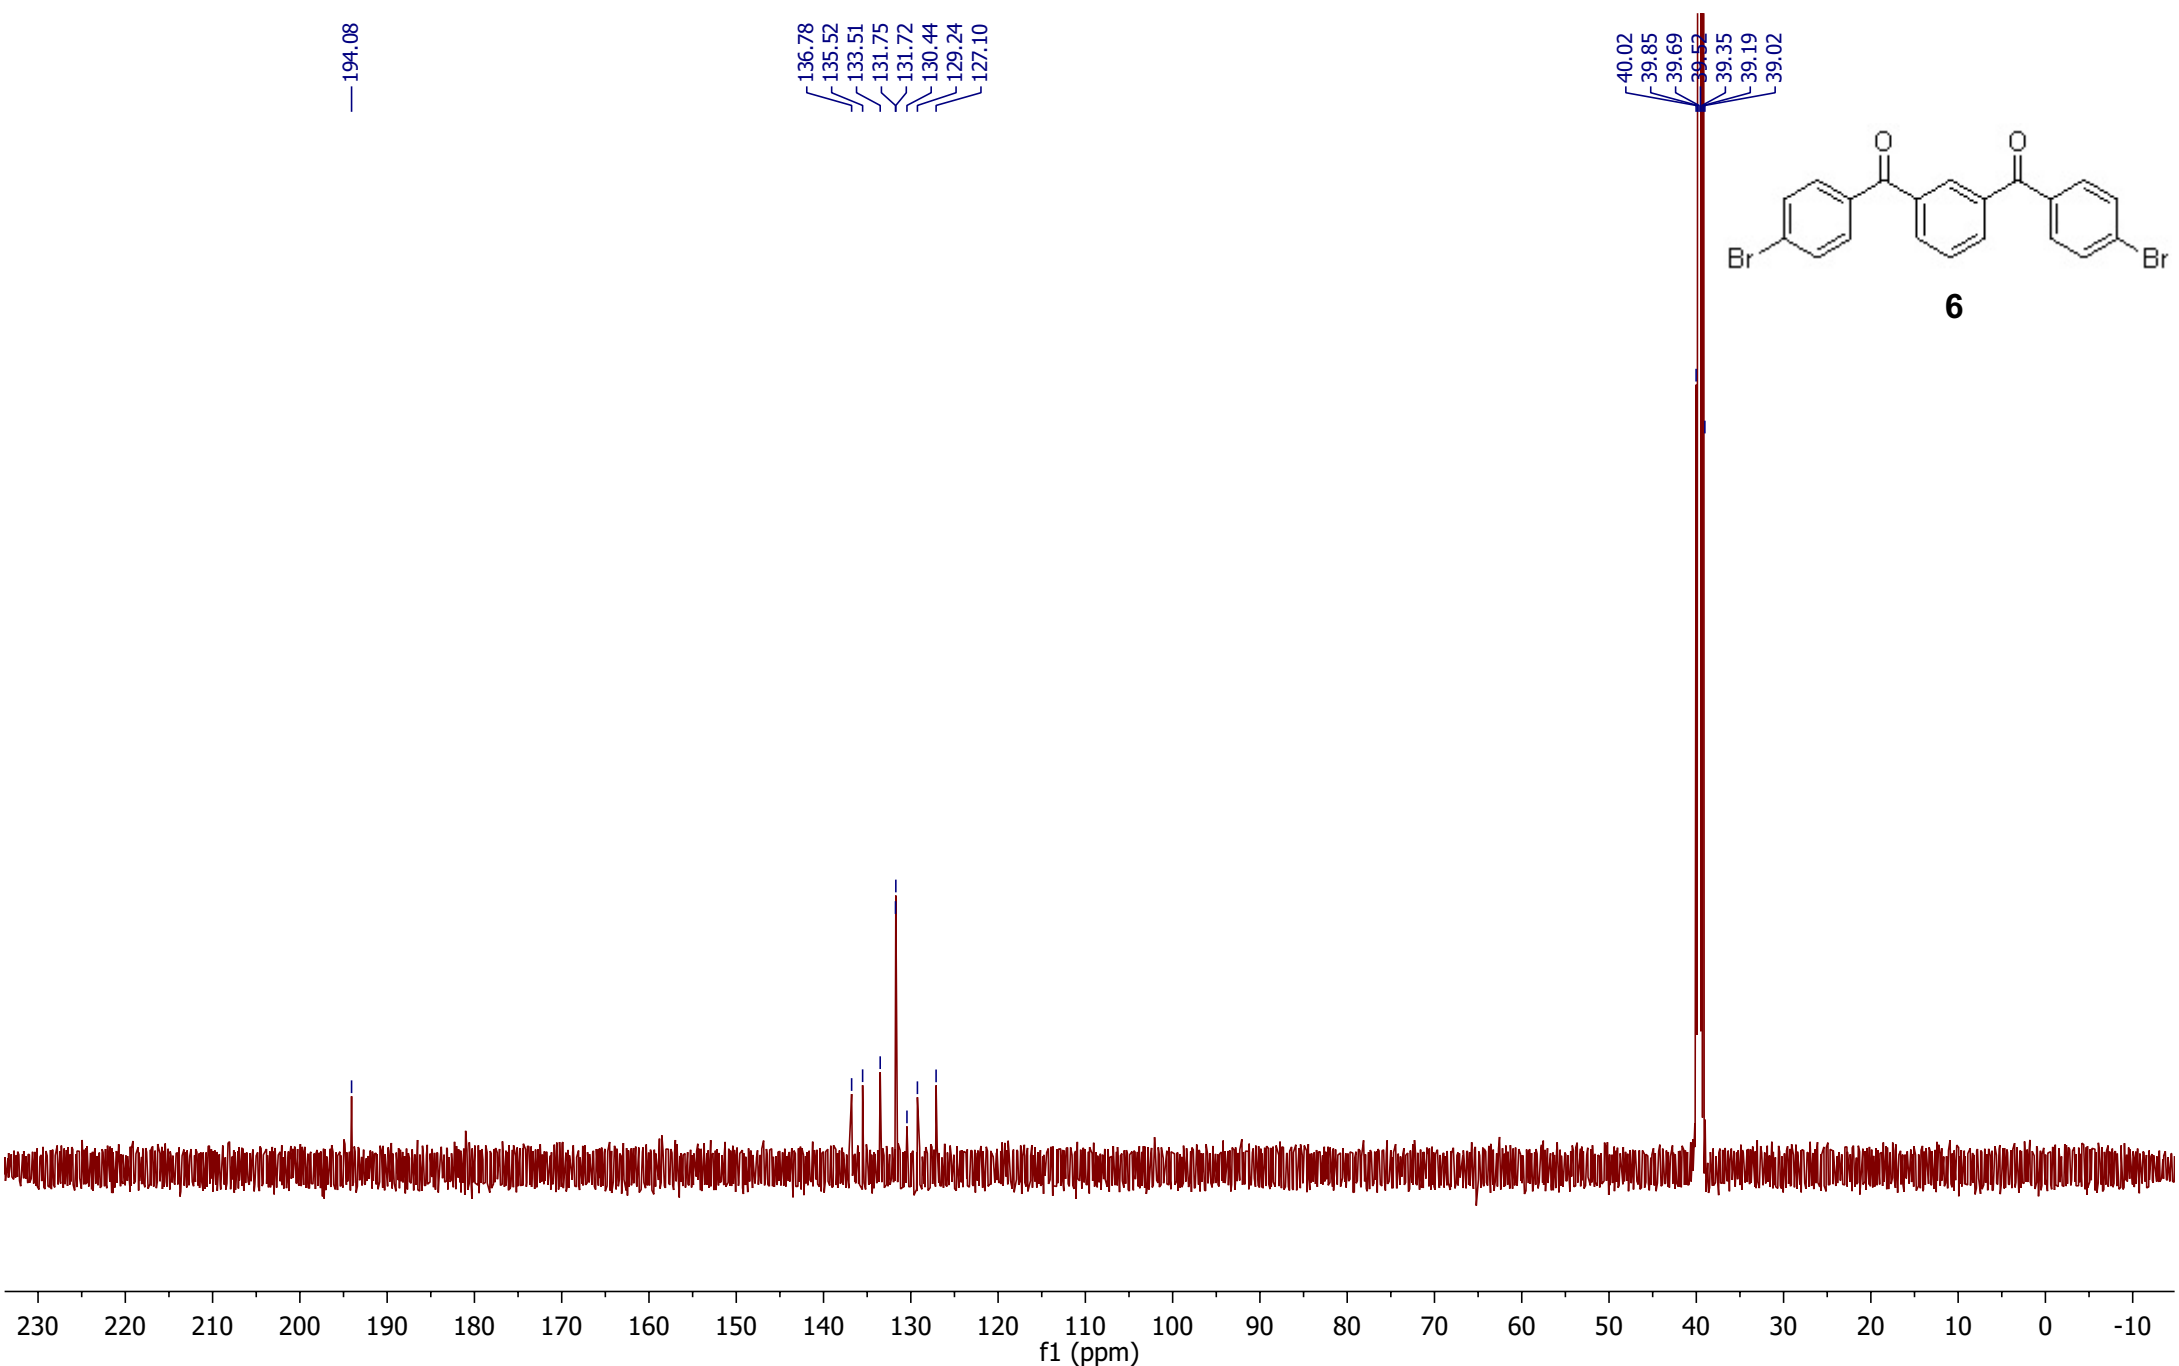

# HRMS (ESI) for Compound 6

C:\Xcalibur\...\ARL\_I\_009\_run6\_Orbi\_+ESI

12/30/2014 11:54:26 PM

ARL\_I\_009\_run6\_Orbi\_+ESI #10 RT: 0.12 AV: 1 NL: 1.30E6  
T: FTMS + c ESI Full ms [100.00-1000.00]

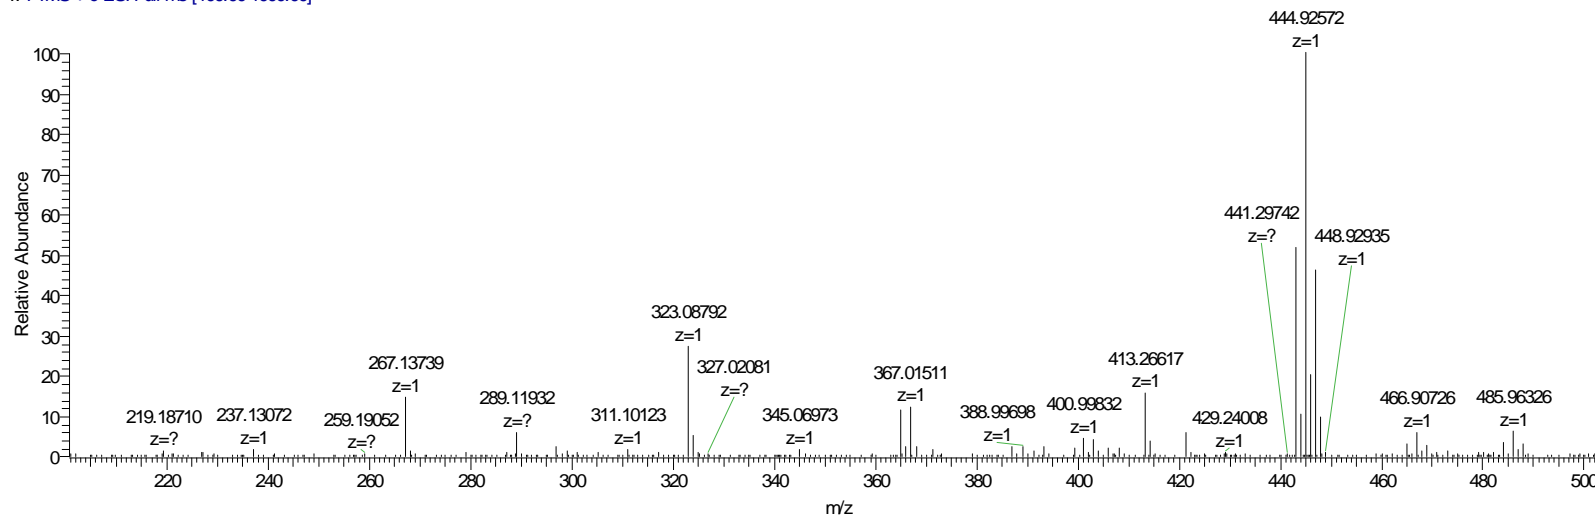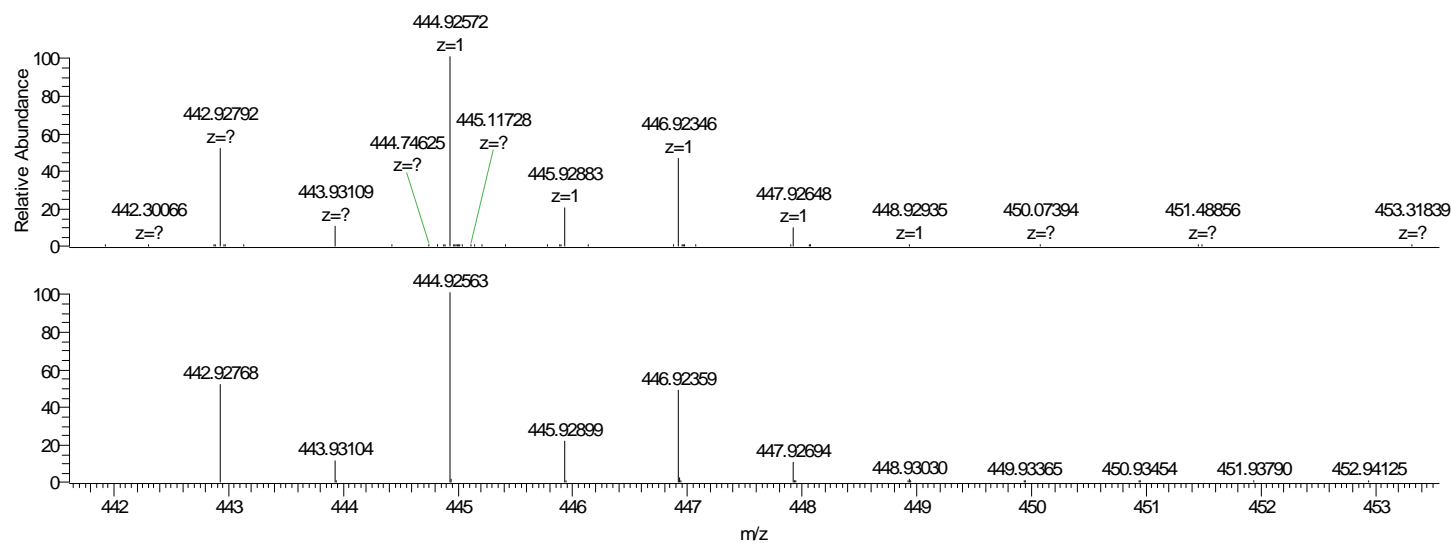

NL:  
1.30E6  
ARL\_I\_009\_run6\_Orbi\_+ESI#10 RT: 0.12 AV: 1 T: FTMS + c ESI Full ms [100.00-1000.00]

NL:  
4.01E5  
C20H2Br2O2 +H  
C20H2Br2O2  
pa Chrg 1

<sup>1</sup>H NMR (500 MHz, CDCl<sub>3</sub>) of Compound **7**

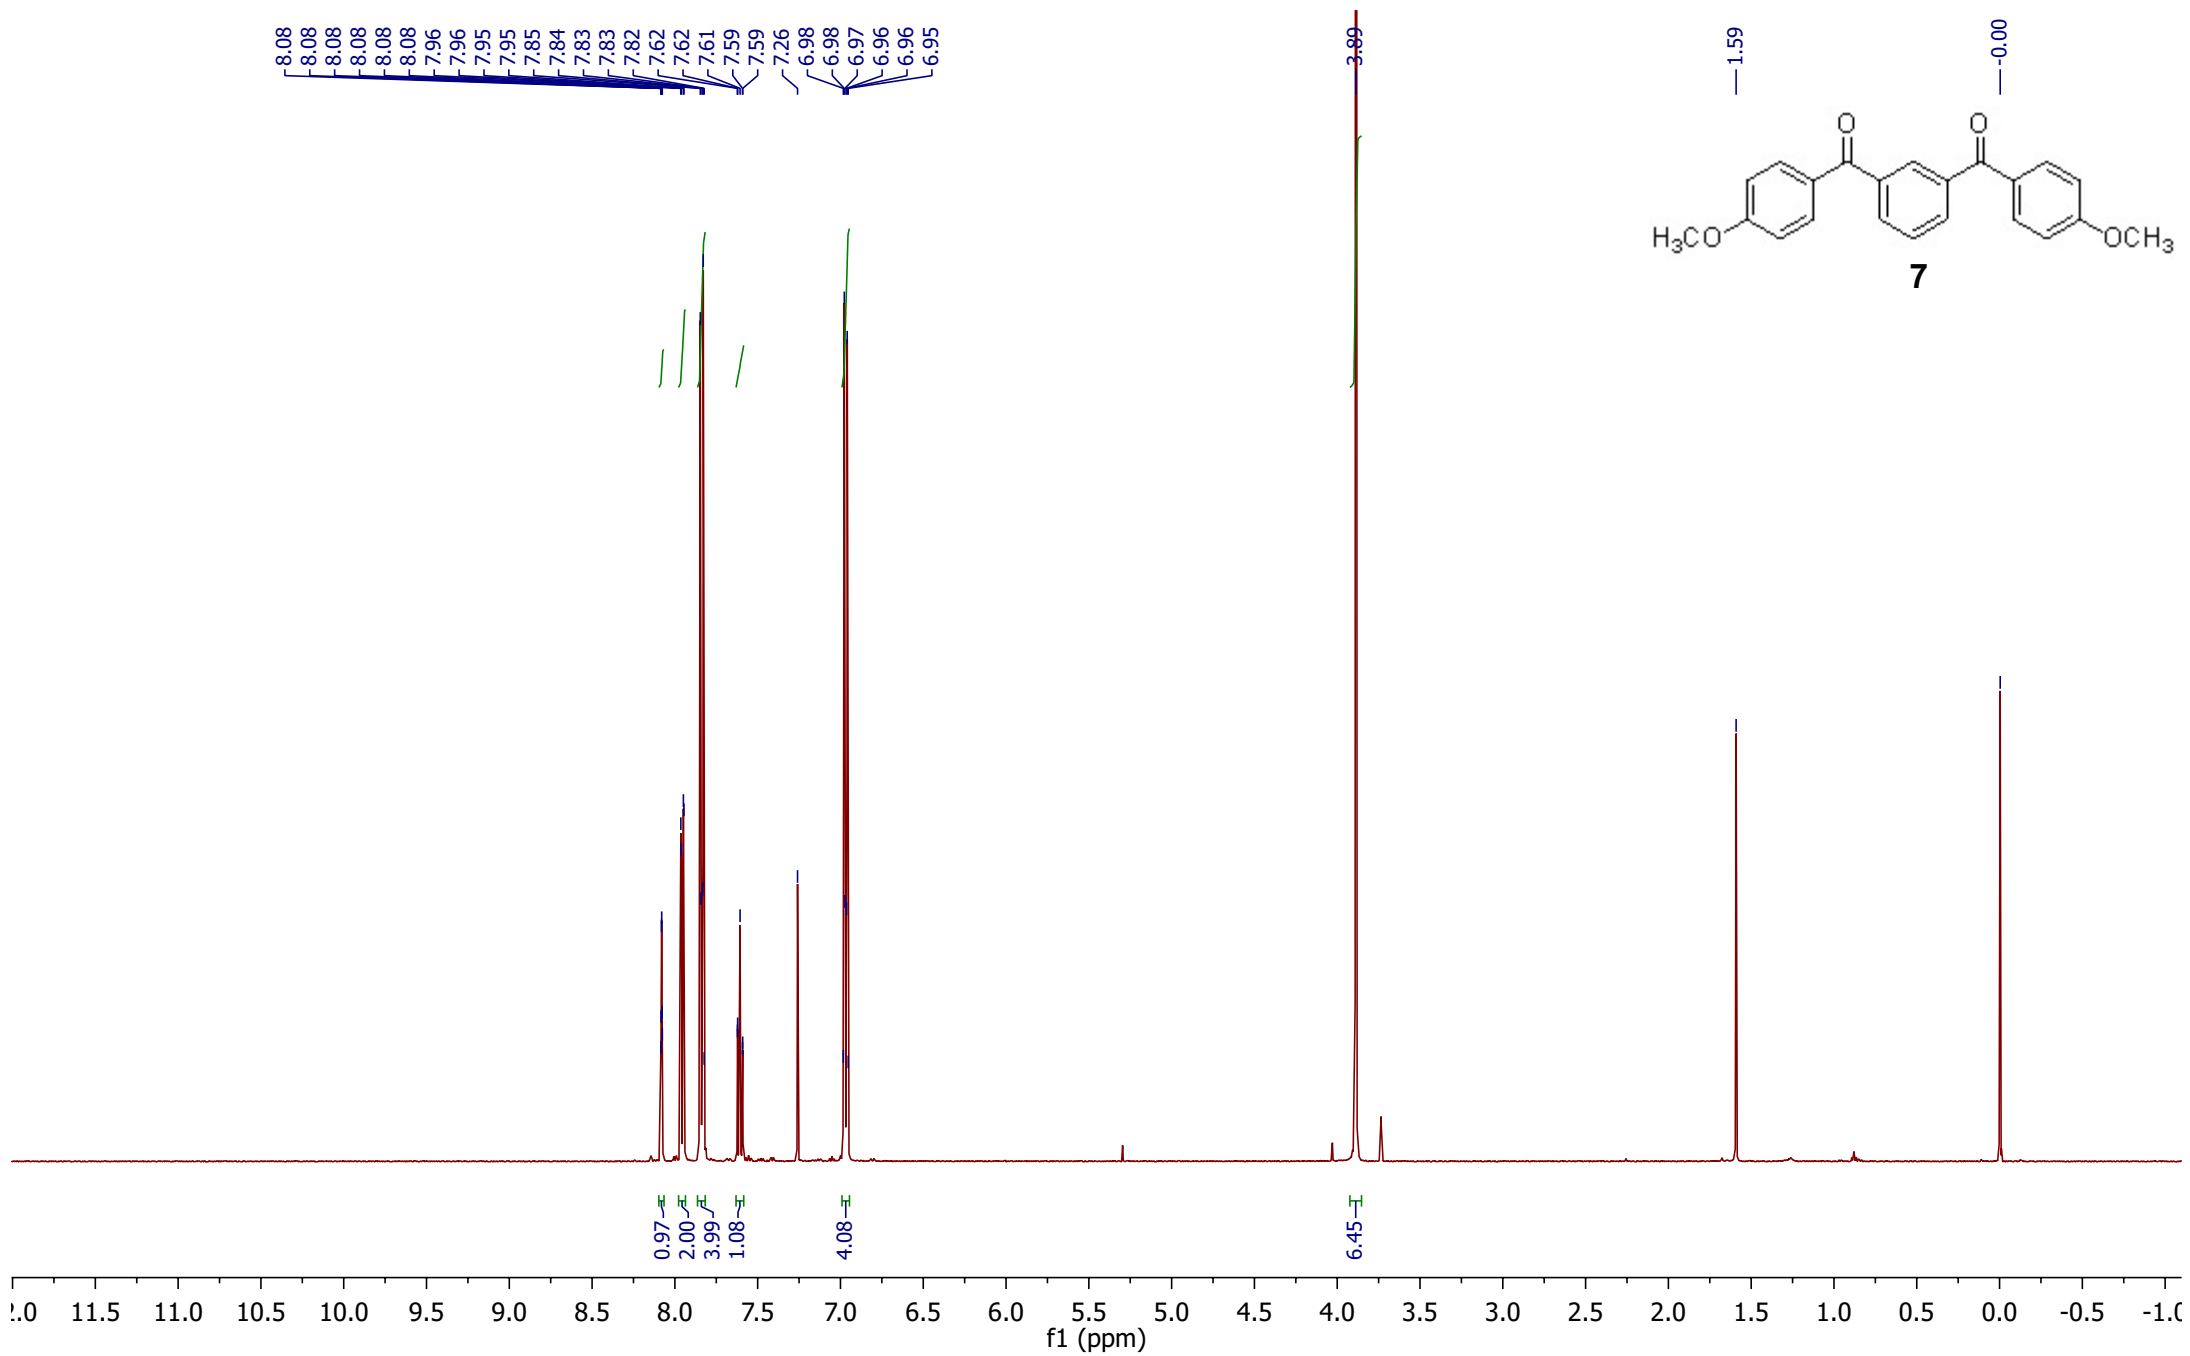

<sup>13</sup>C NMR (125 MHz, CDCl<sub>3</sub>) of Compound **7**

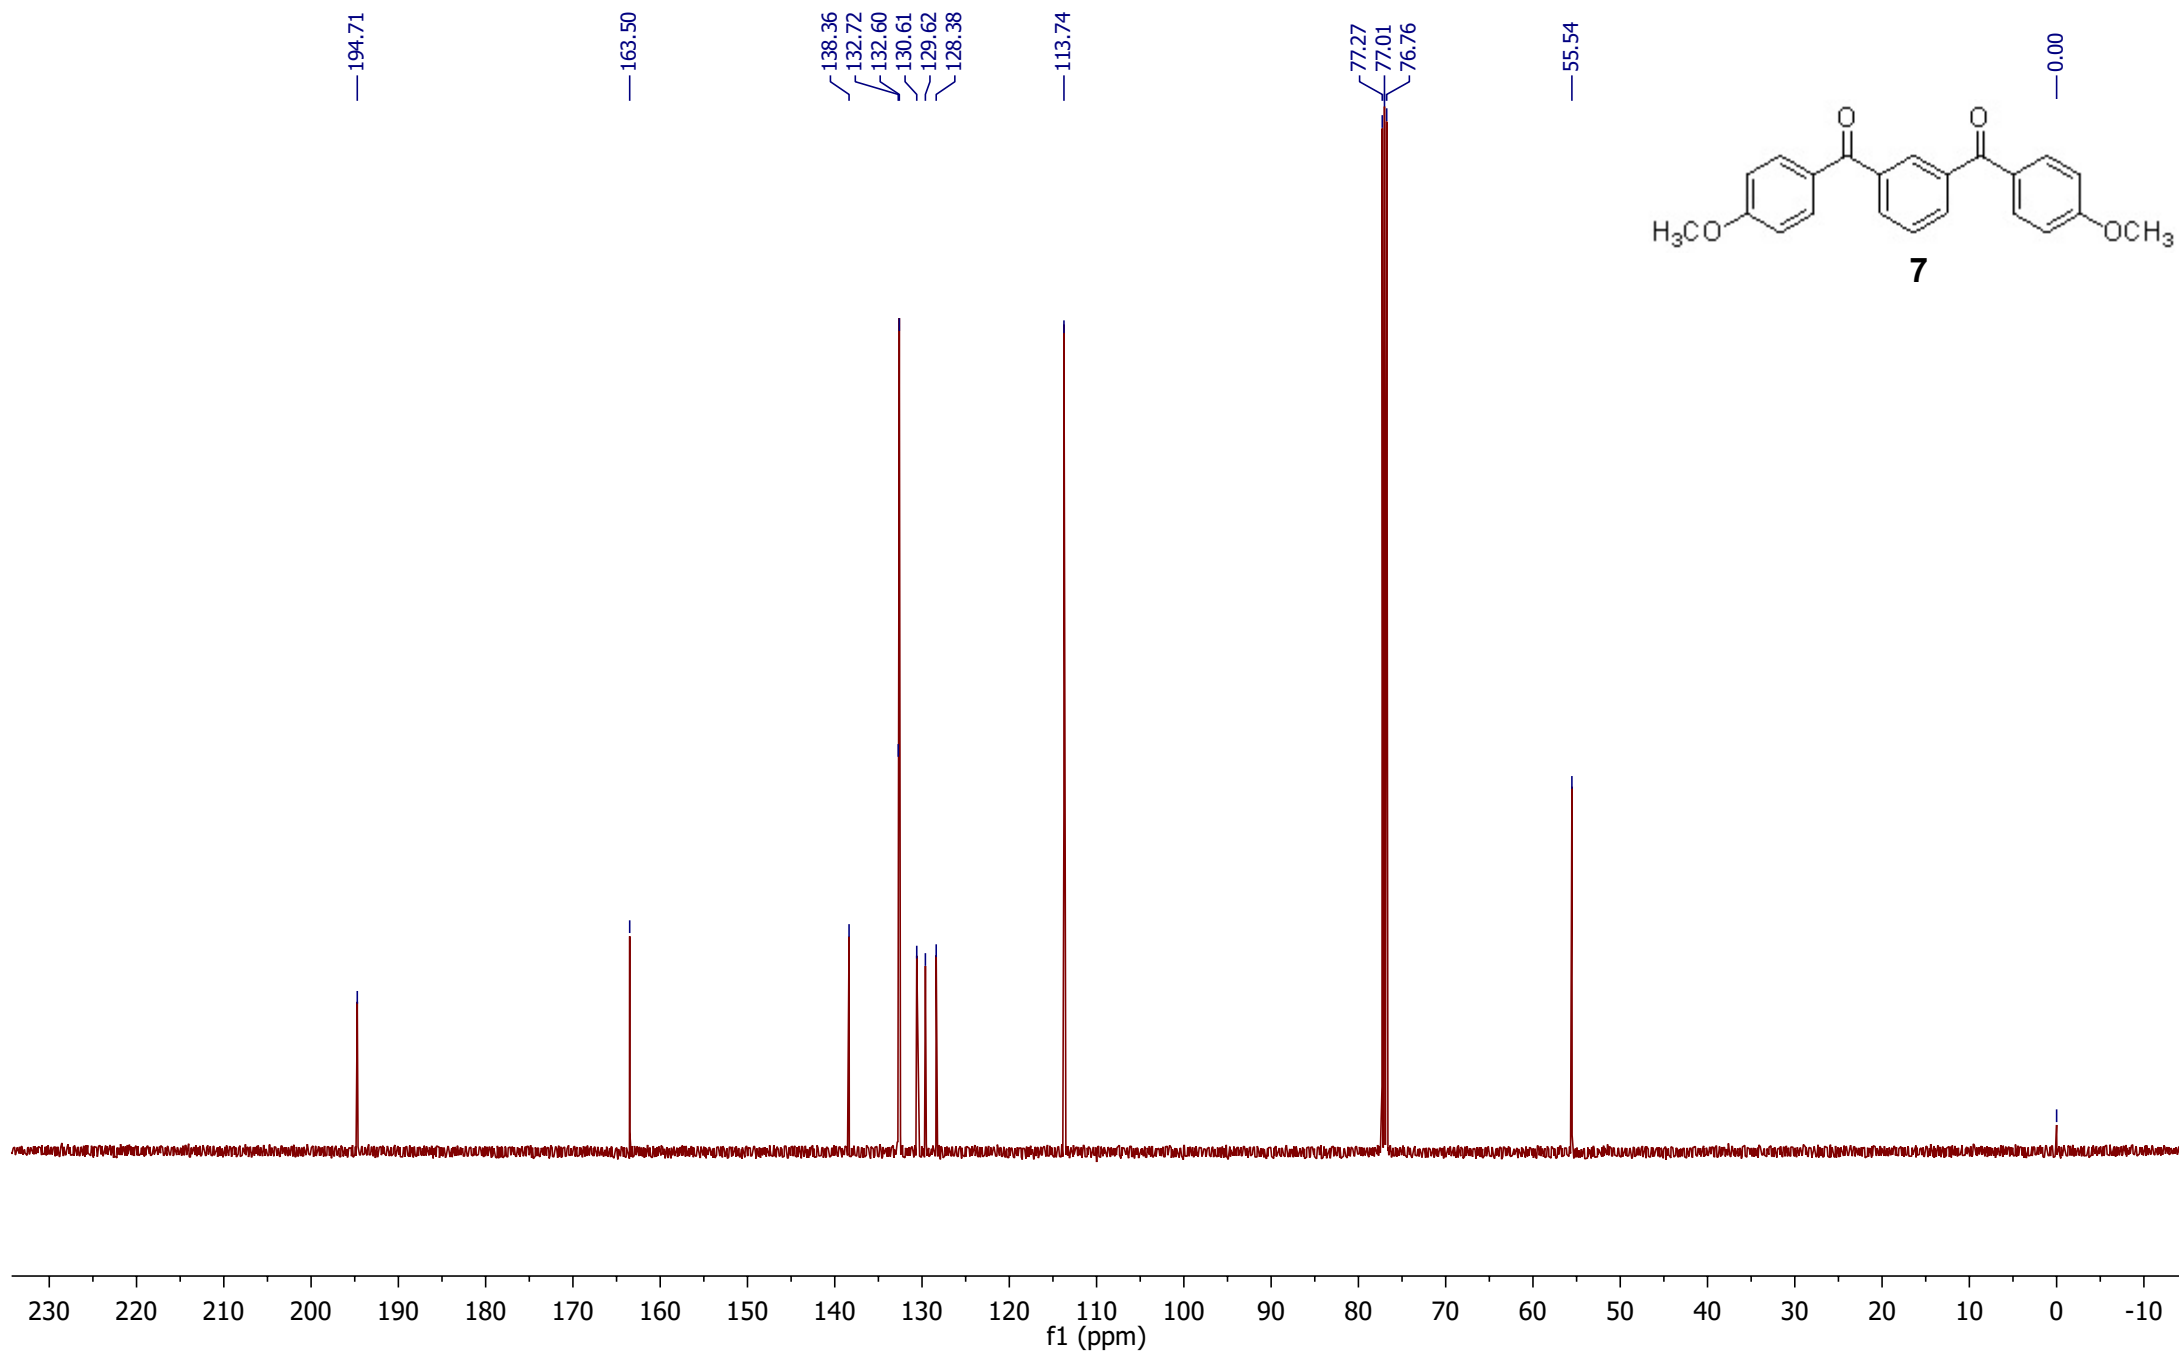

# HRMS (ESI) for Compound 7

C:\Xcalibur\...Erica\12-19-14\ENP\_V\_77

12/19/2014 10:06:00 AM

ENP\_V\_77 #259-280 RT: 2.71-2.91 AV: 22 NL: 8.96E7  
T: FTMS + p ESI Full ms [100.00-700.00]

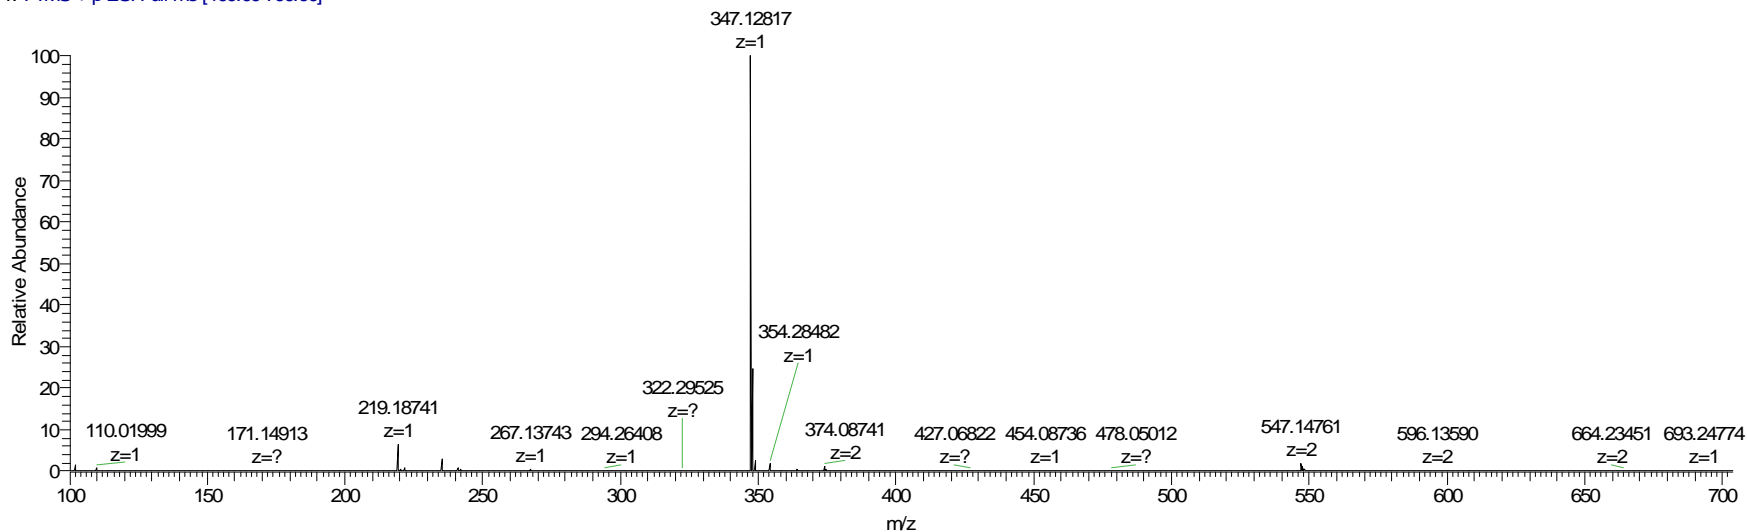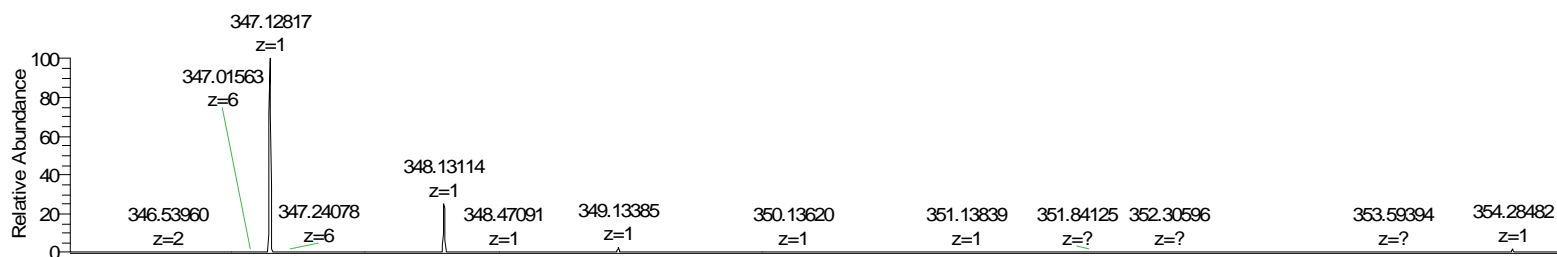

NL:  
8.96E7  
ENP\_V\_77#259-280  
RT: 2.71-2.91 AV:  
22 T: FTMS + p ESI  
Full ms  
[100.00-700.00]

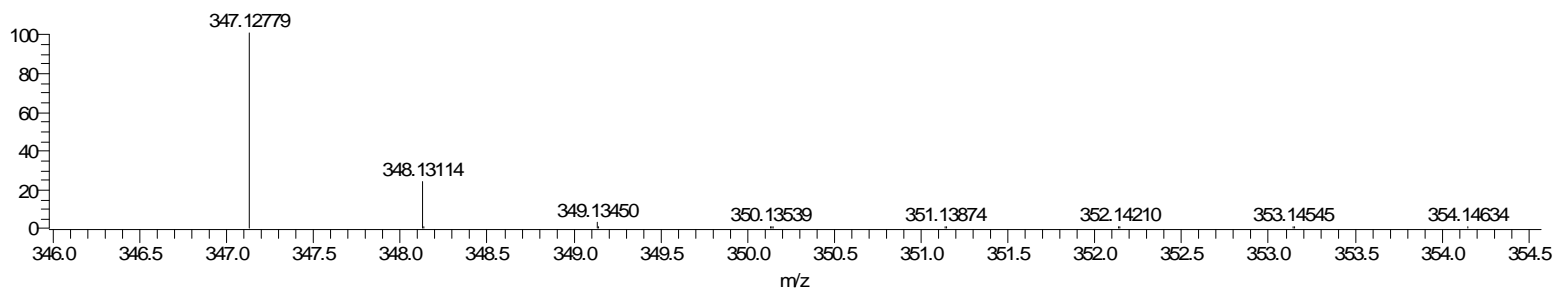

NL:  
7.80E5  
C22H8O4 +H  
C22H8O4  
pa Chrg 1

<sup>1</sup>H NMR (500 MHz, CDCl<sub>3</sub>) of Compound **8**

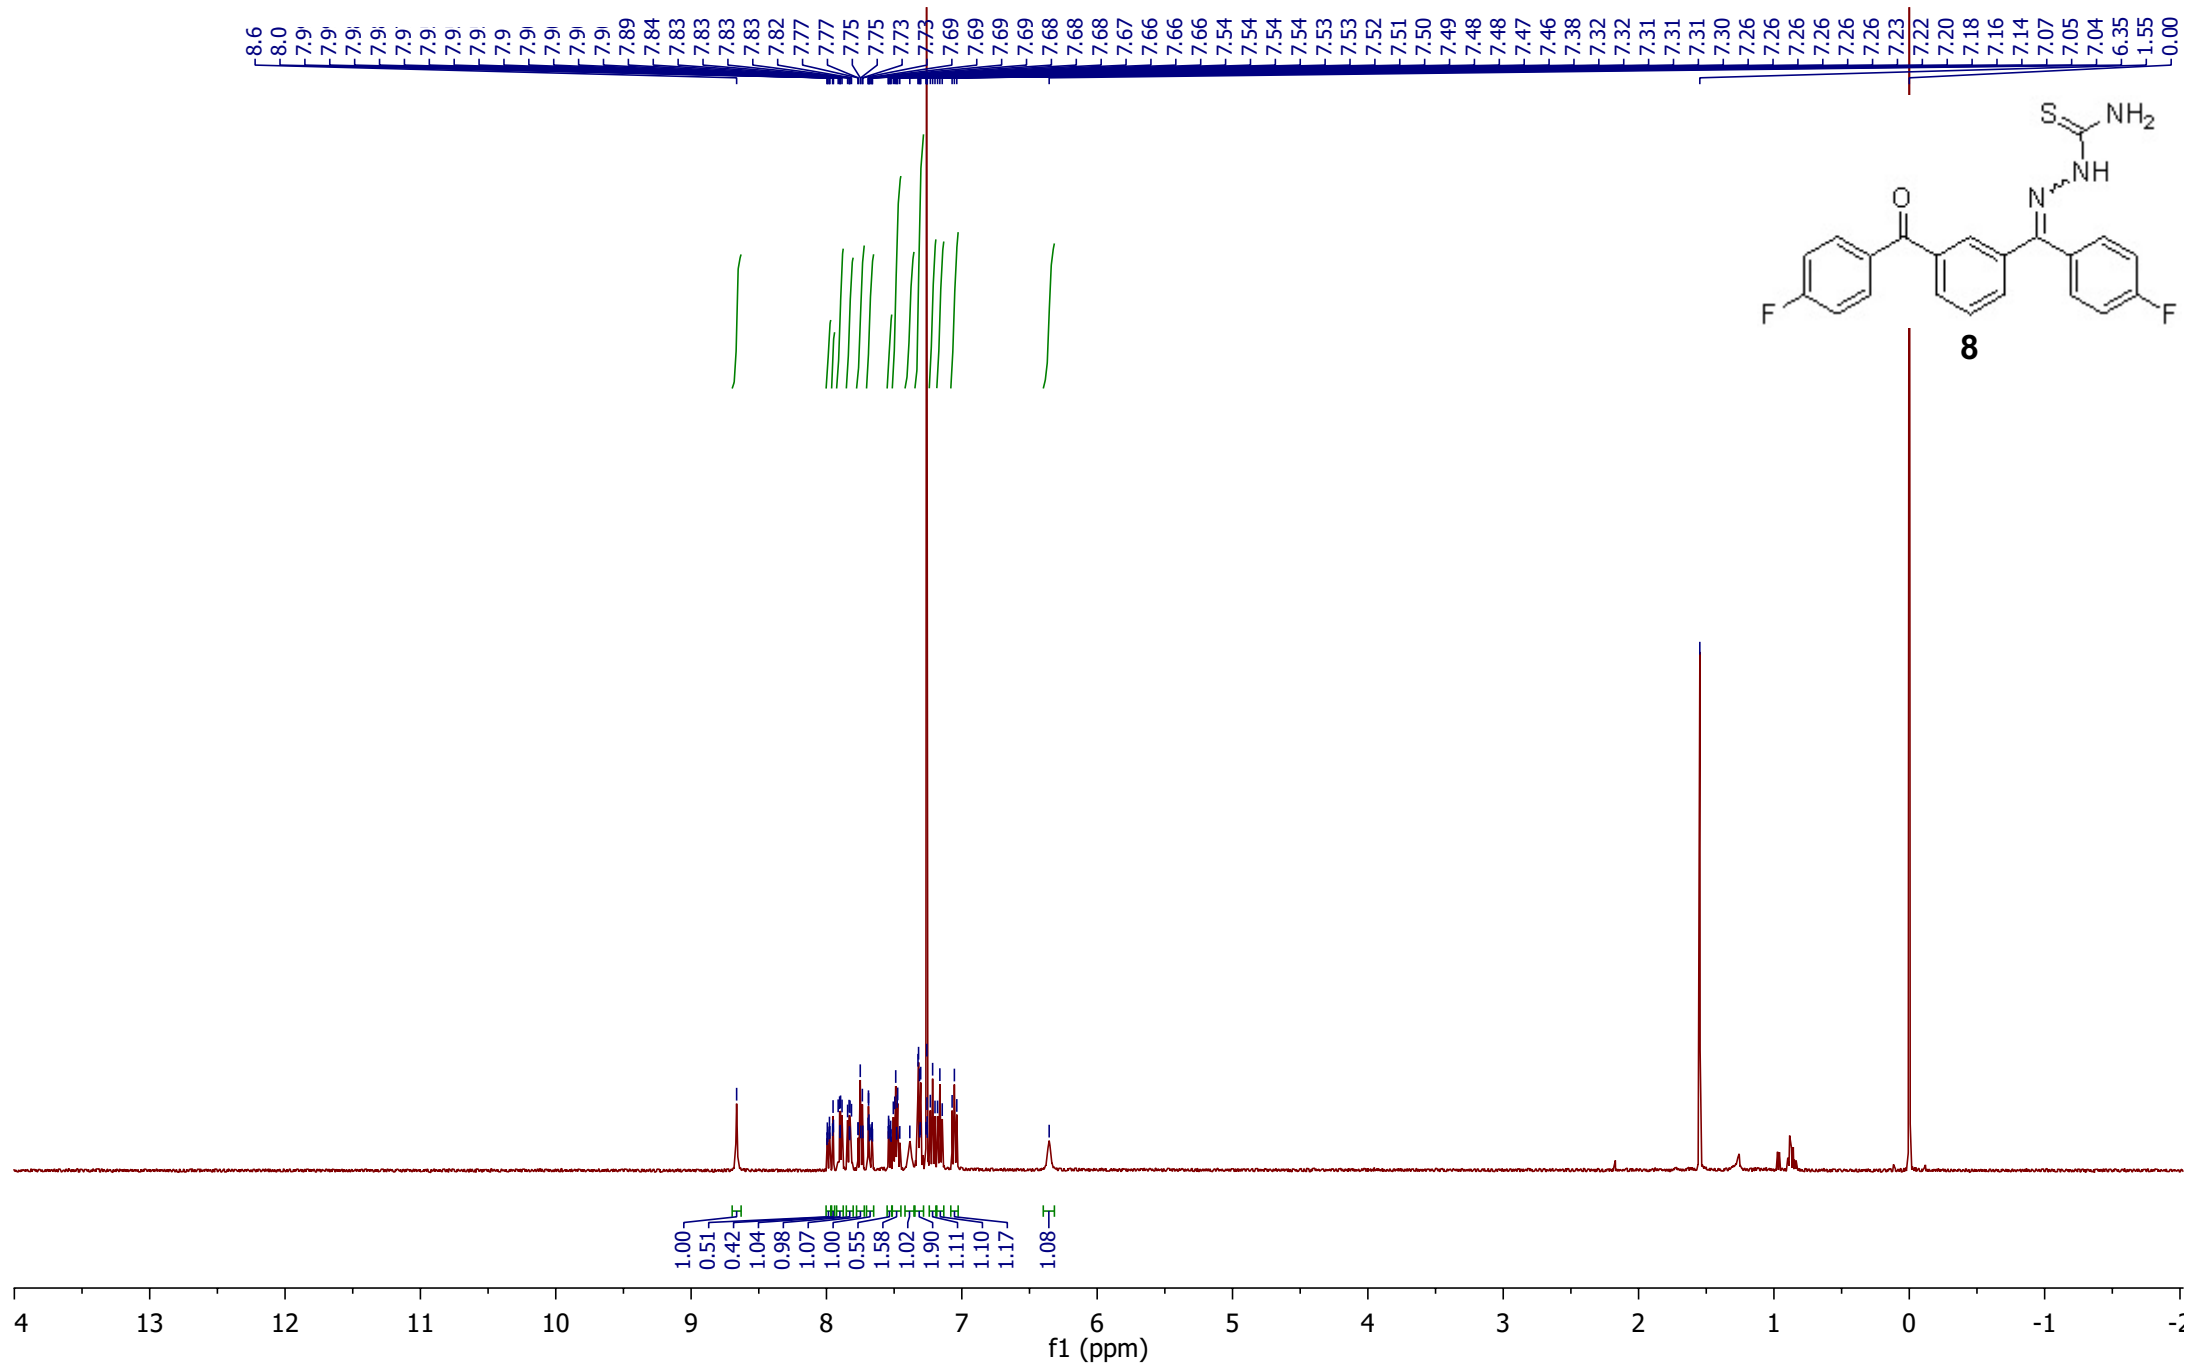

<sup>13</sup>C NMR (125 MHz, CDCl<sub>3</sub>) of Compound **8**

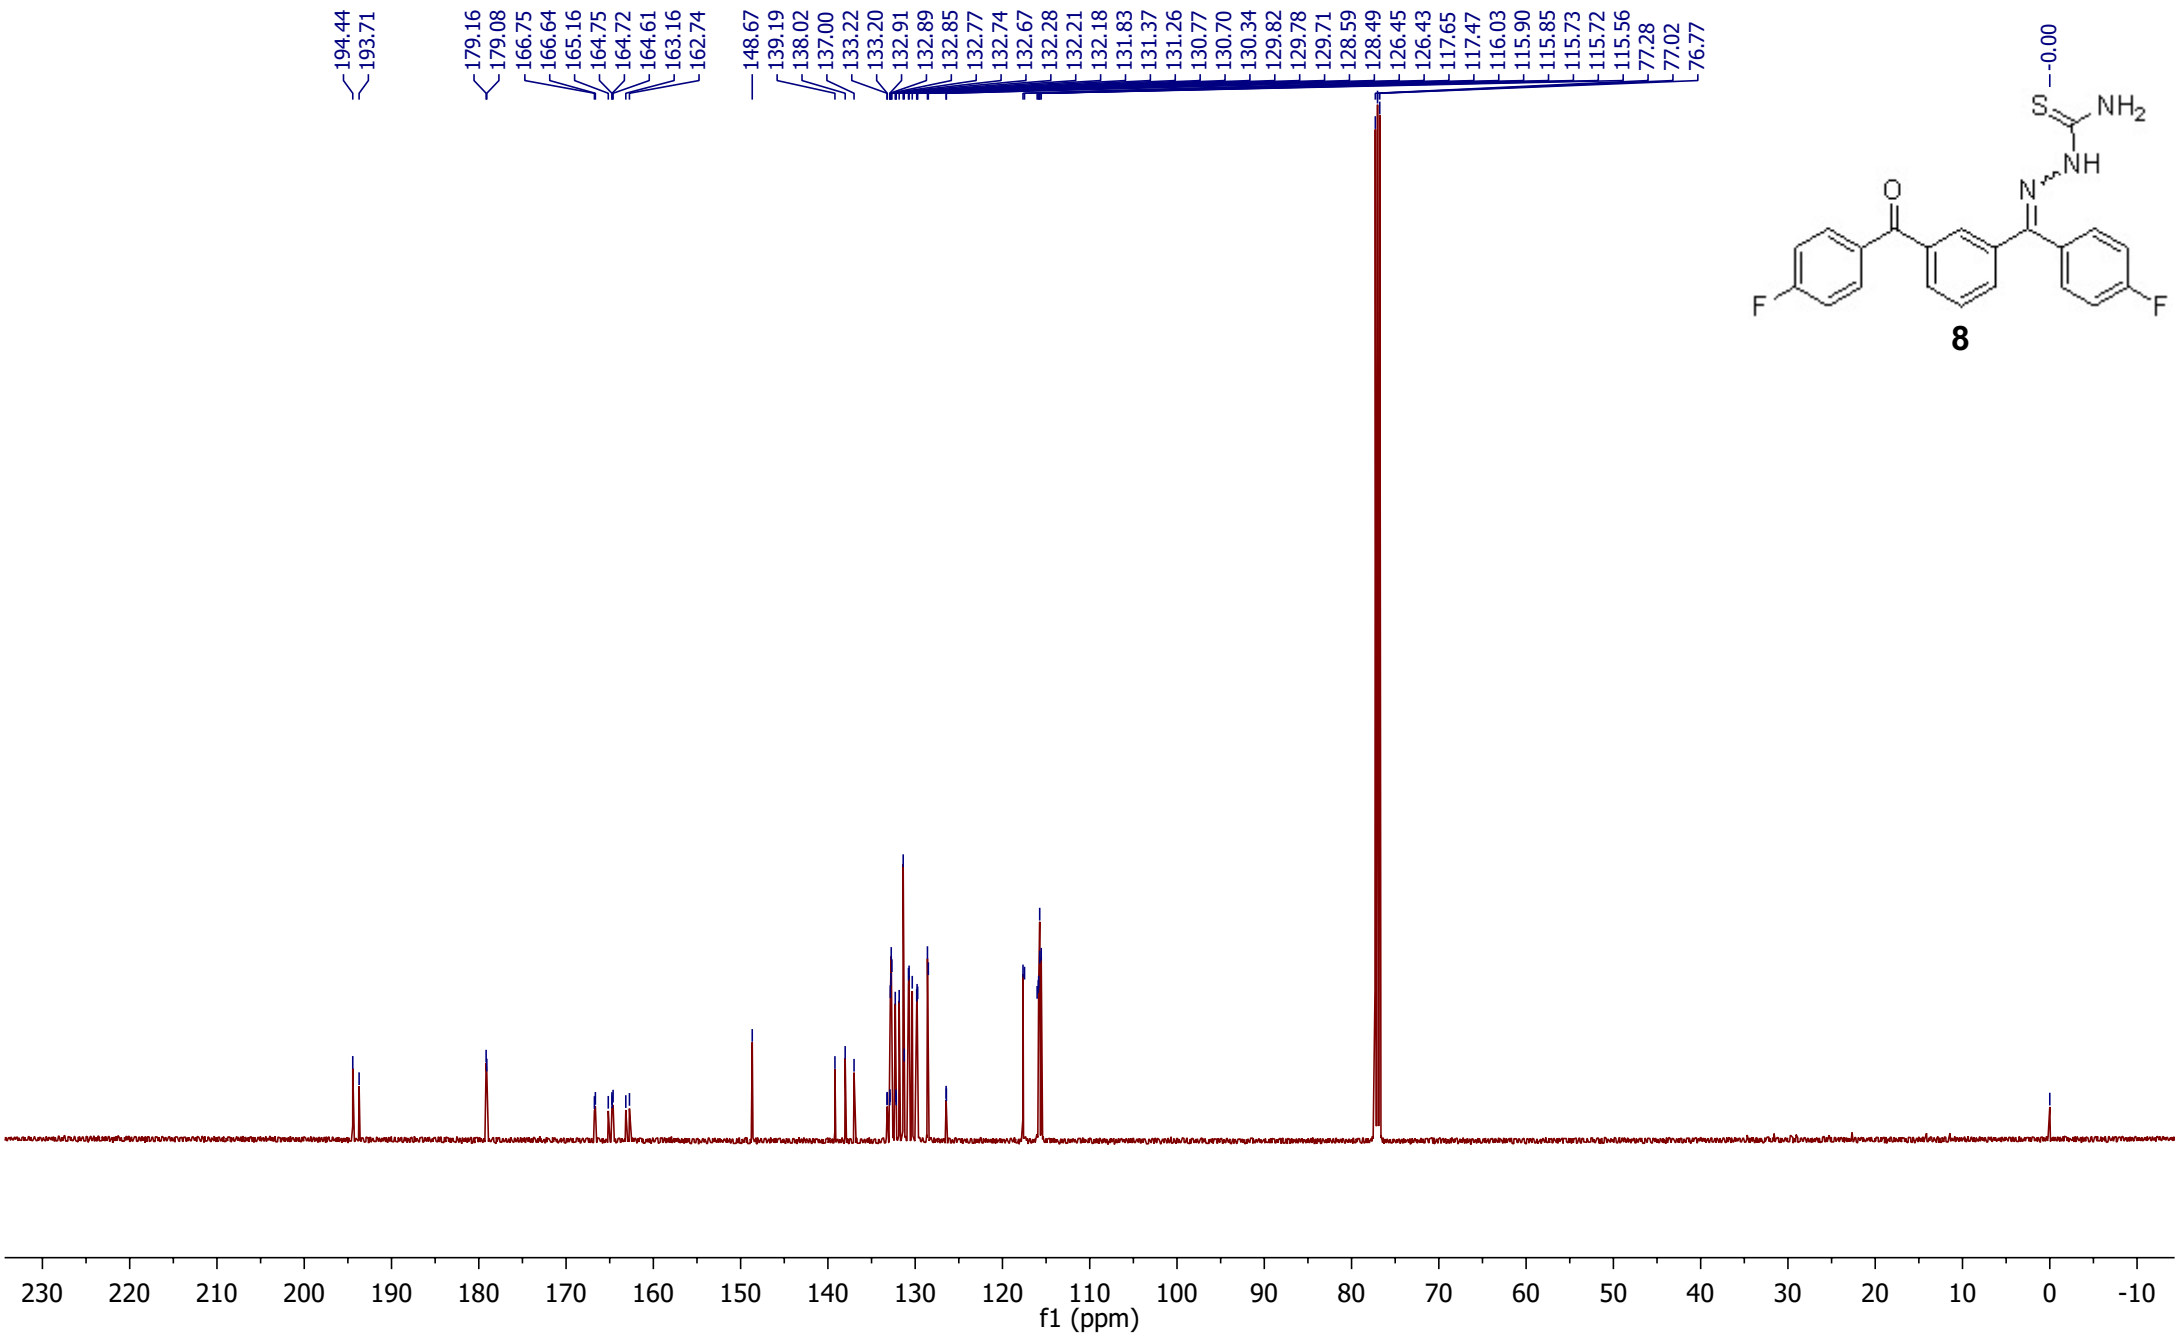

DEPT (CH only, 125 MHz, CDCl<sub>3</sub>) for compound **8**

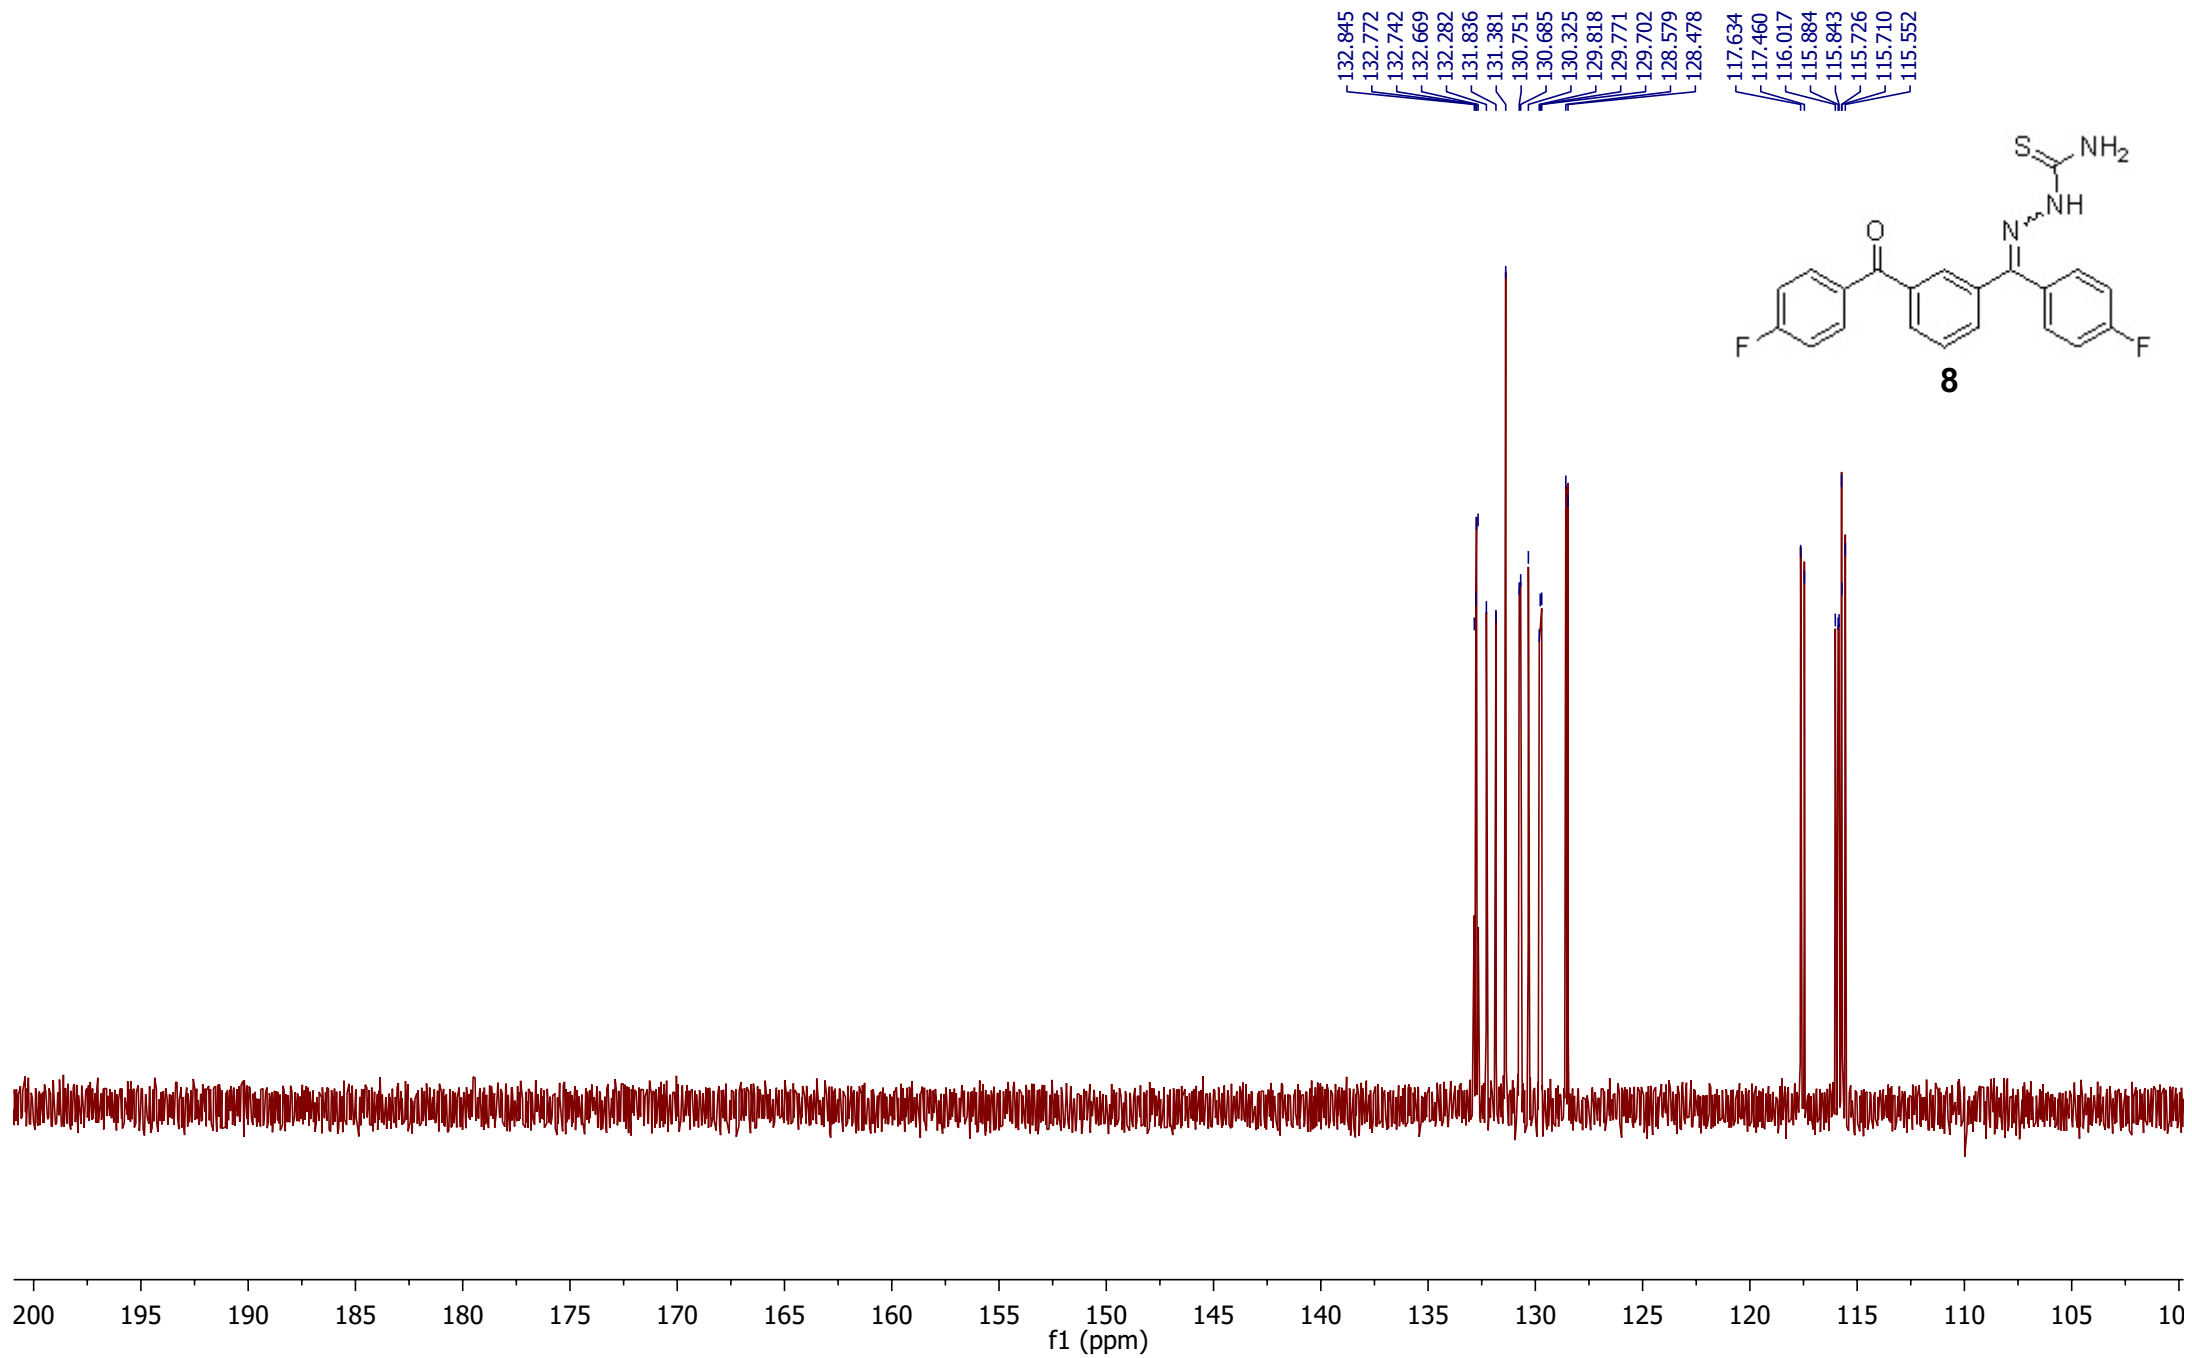



gHETCOR (125 MHz, CDCl<sub>3</sub>) for compound **8**

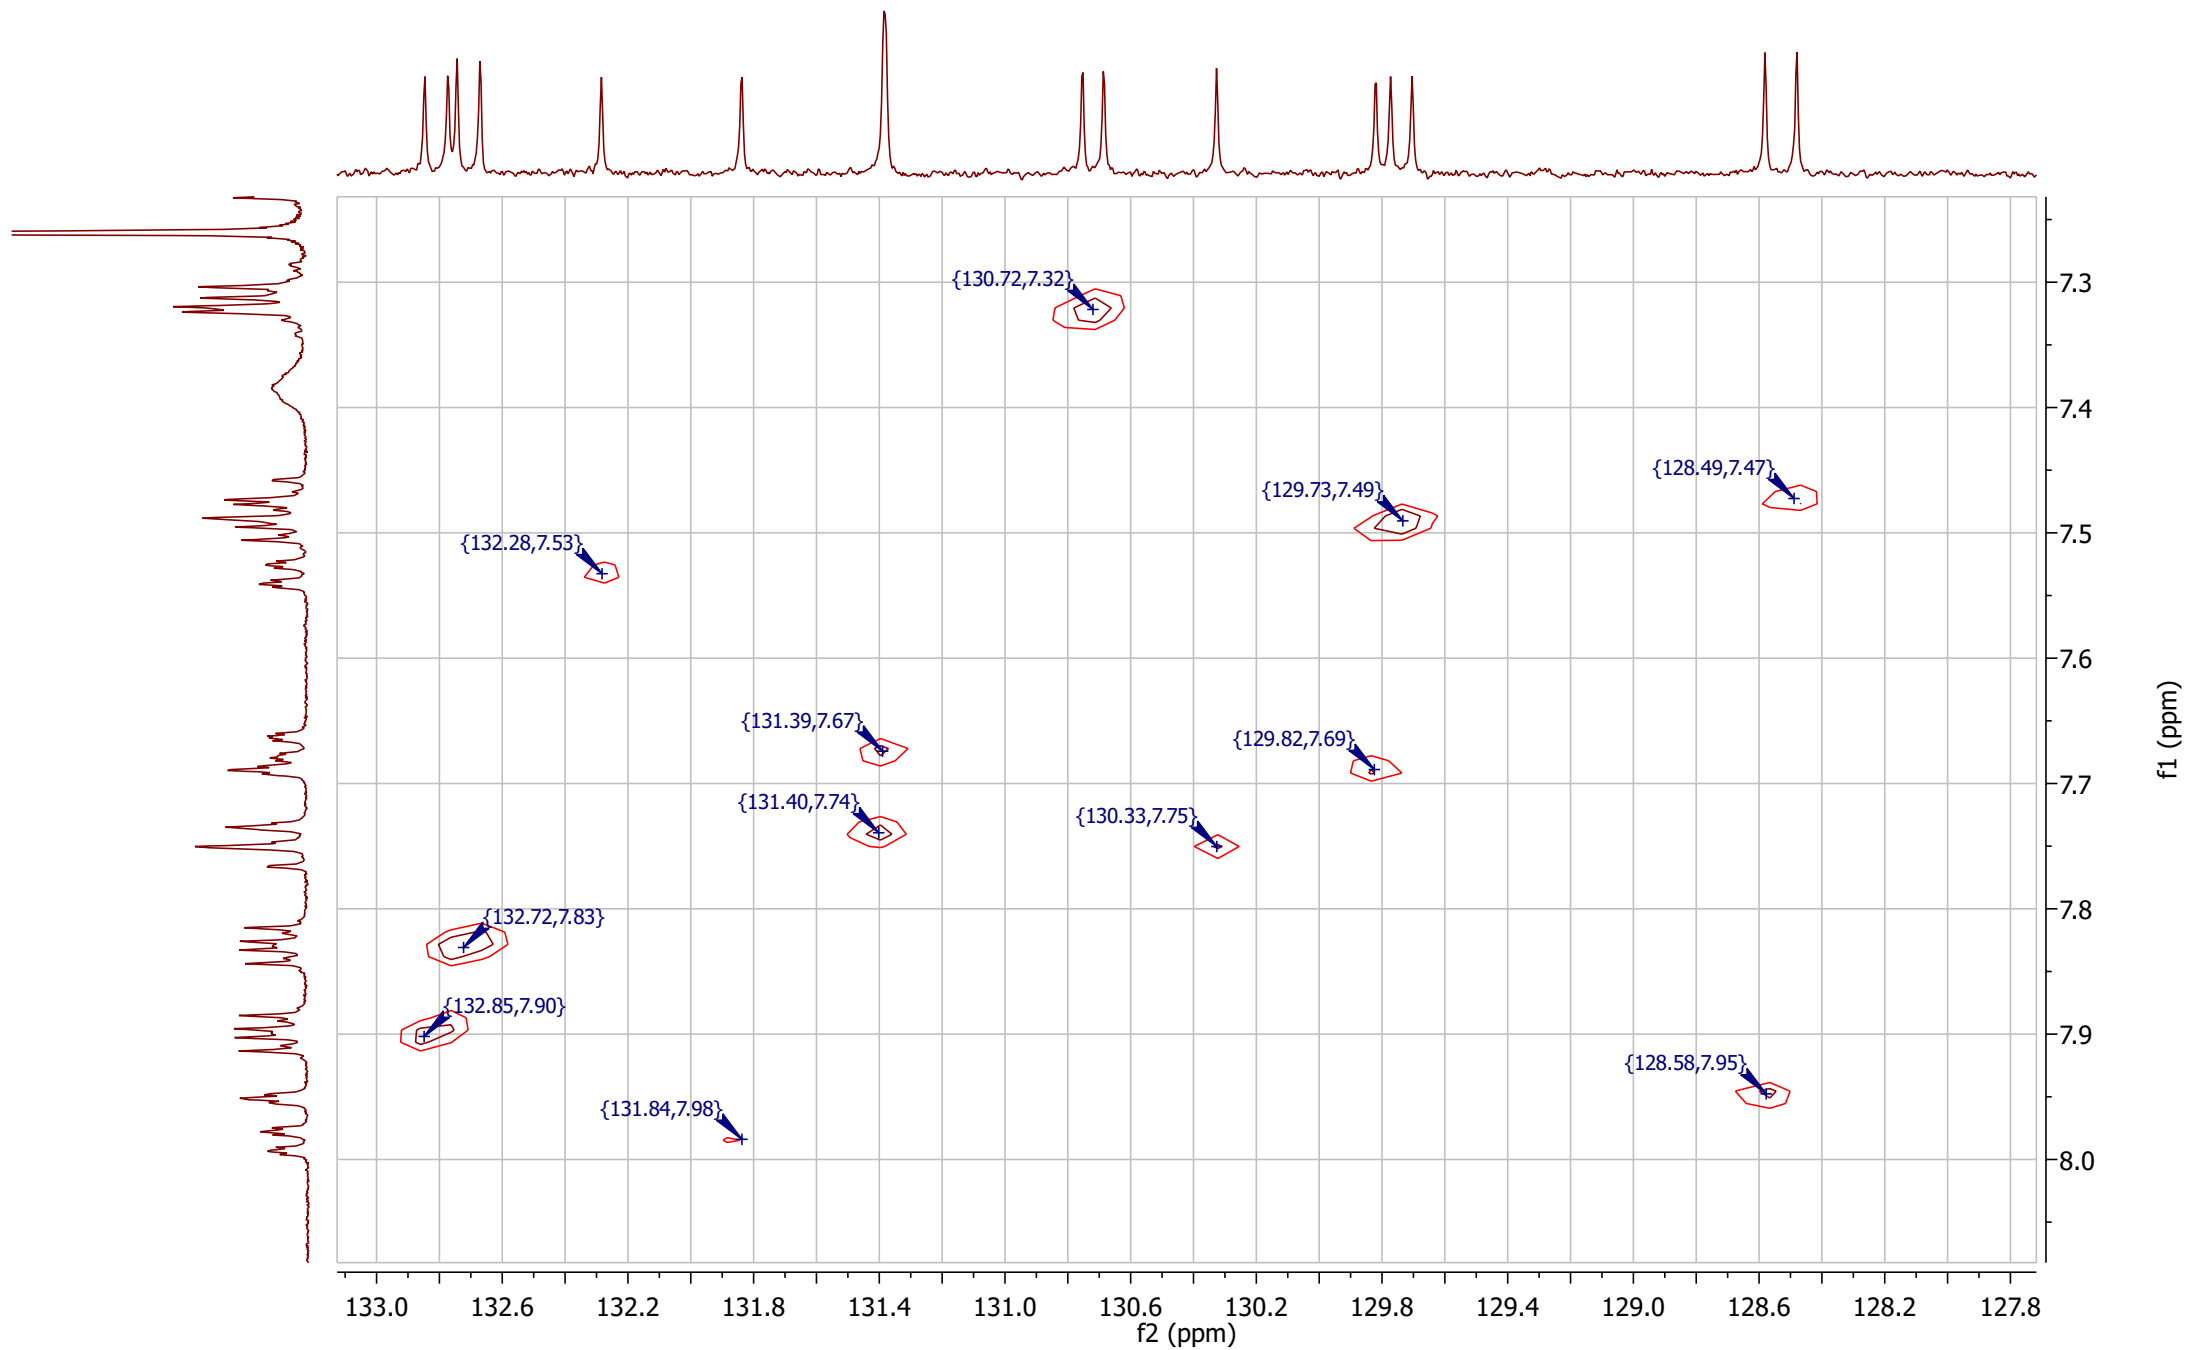

gHETCOR (125 MHz, CDCl<sub>3</sub>) for compound **8**

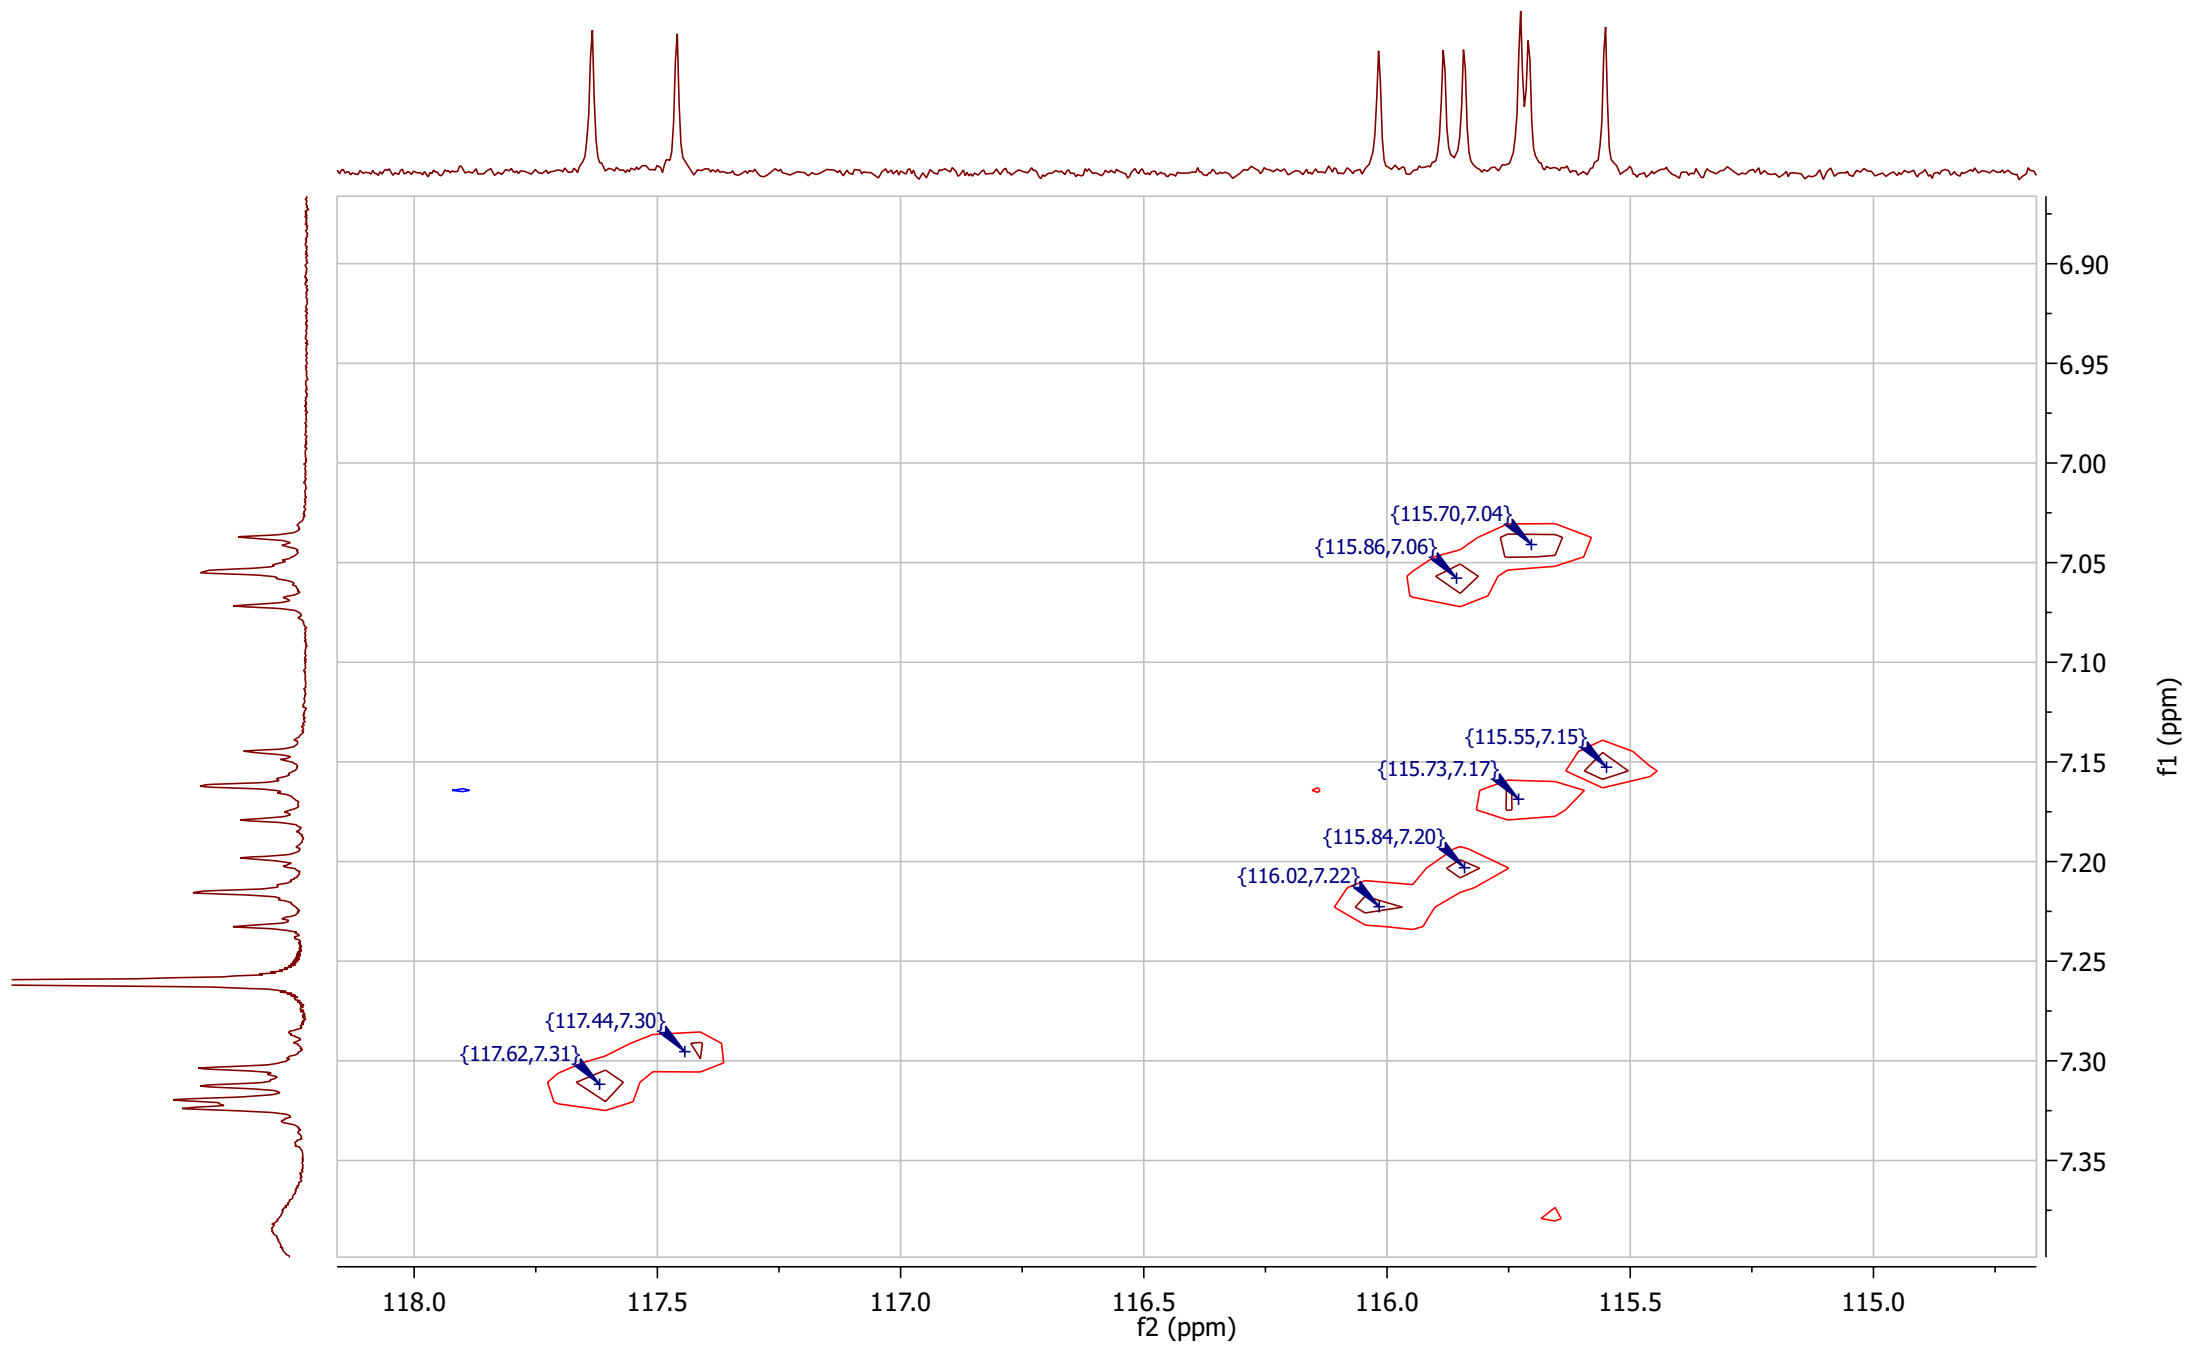



gHMBCAD (CDCl<sub>3</sub>) for compound **8**

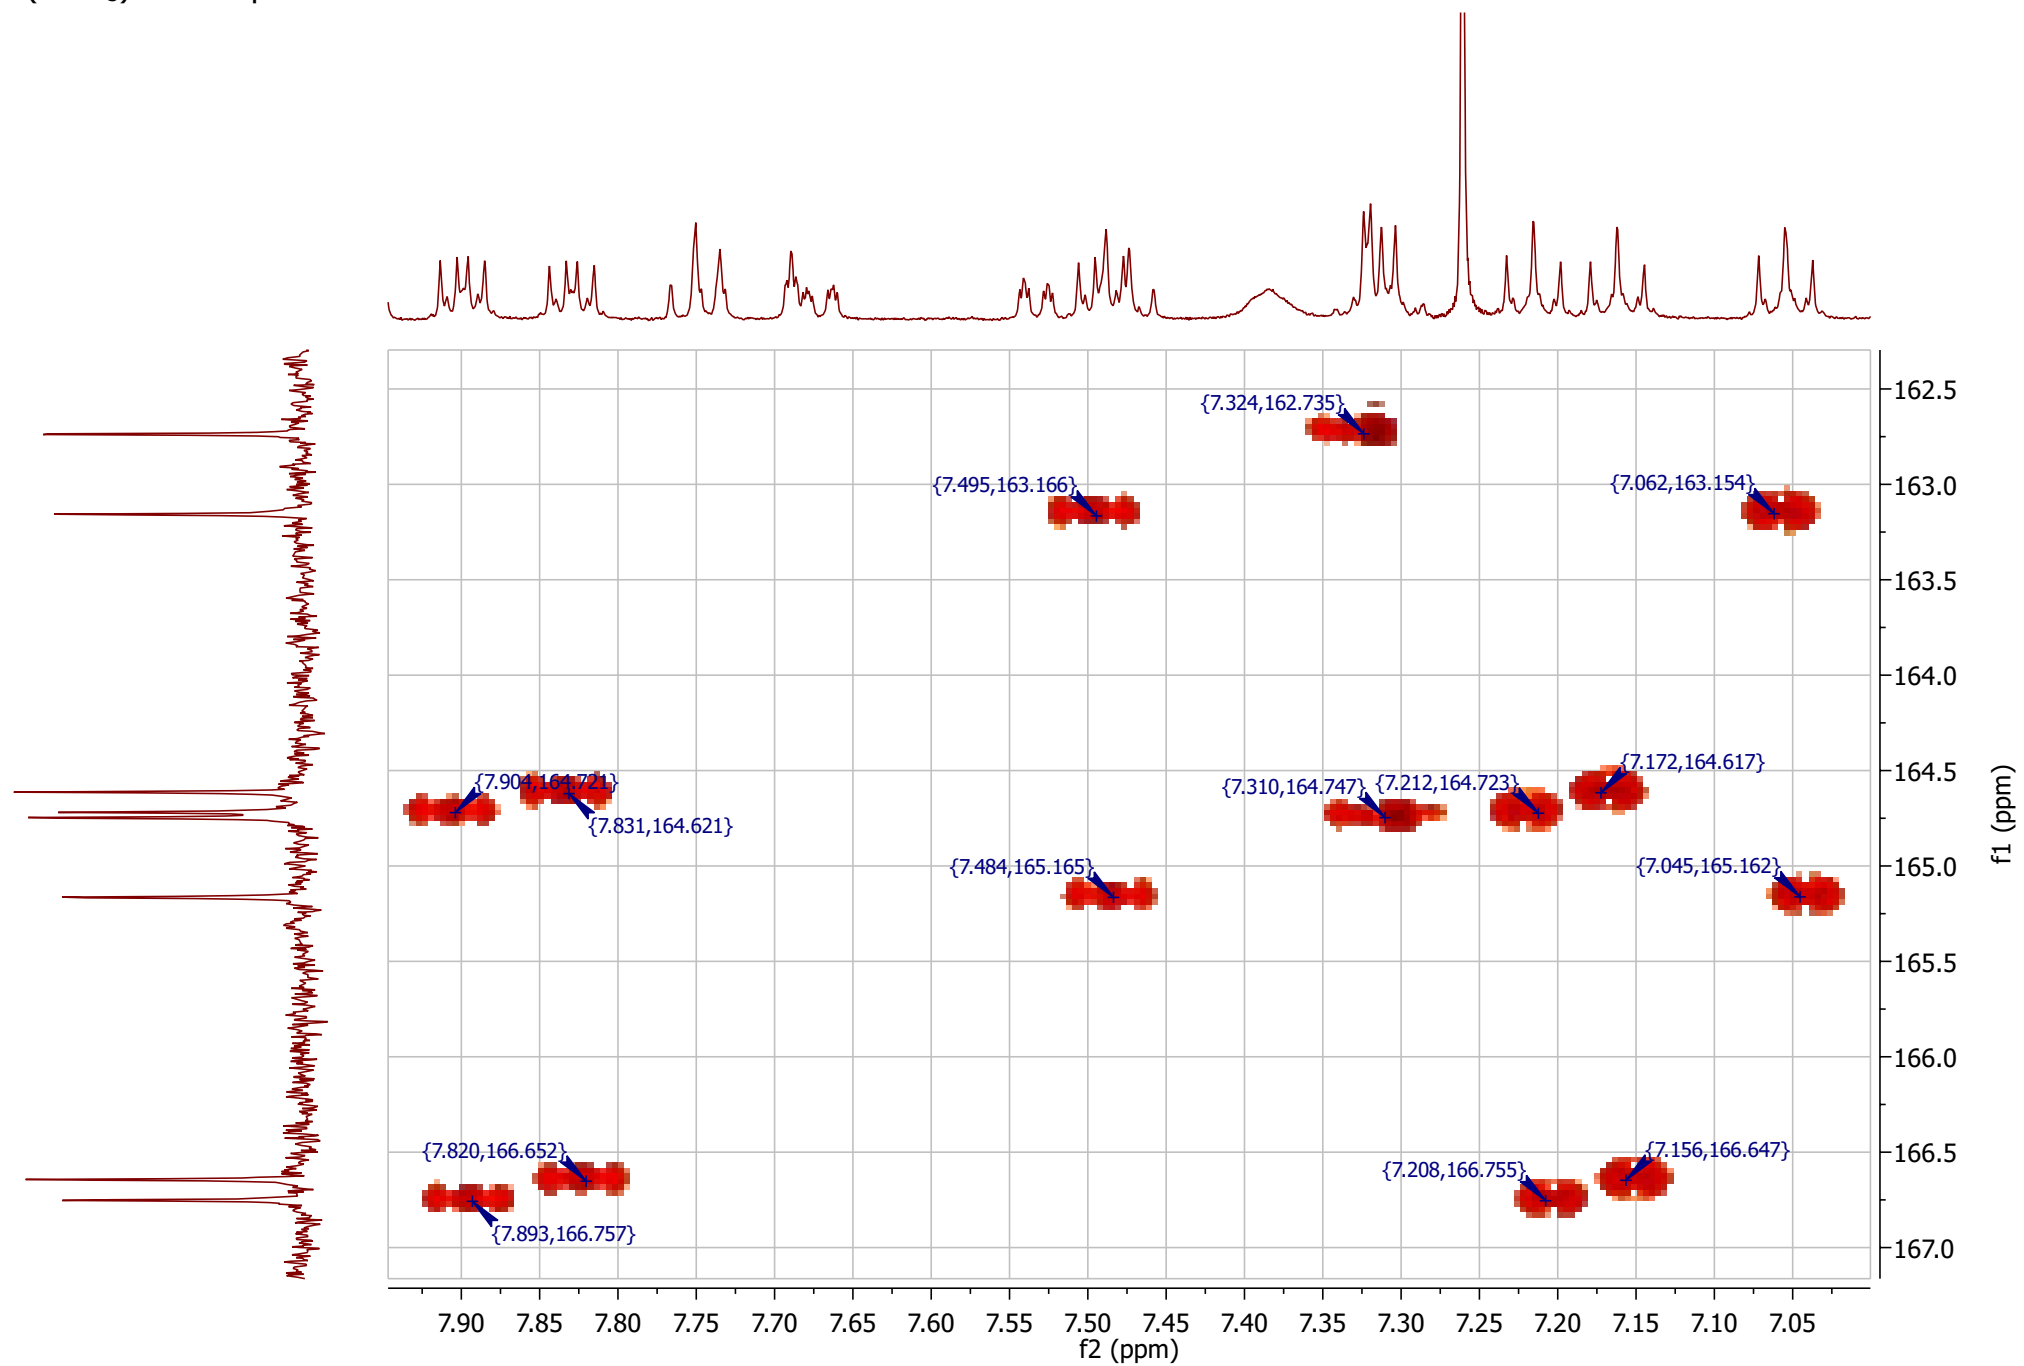

$^{19}\text{F}$  NMR (565 MHz,  $\text{CDCl}_3$ ) of Compound **8**

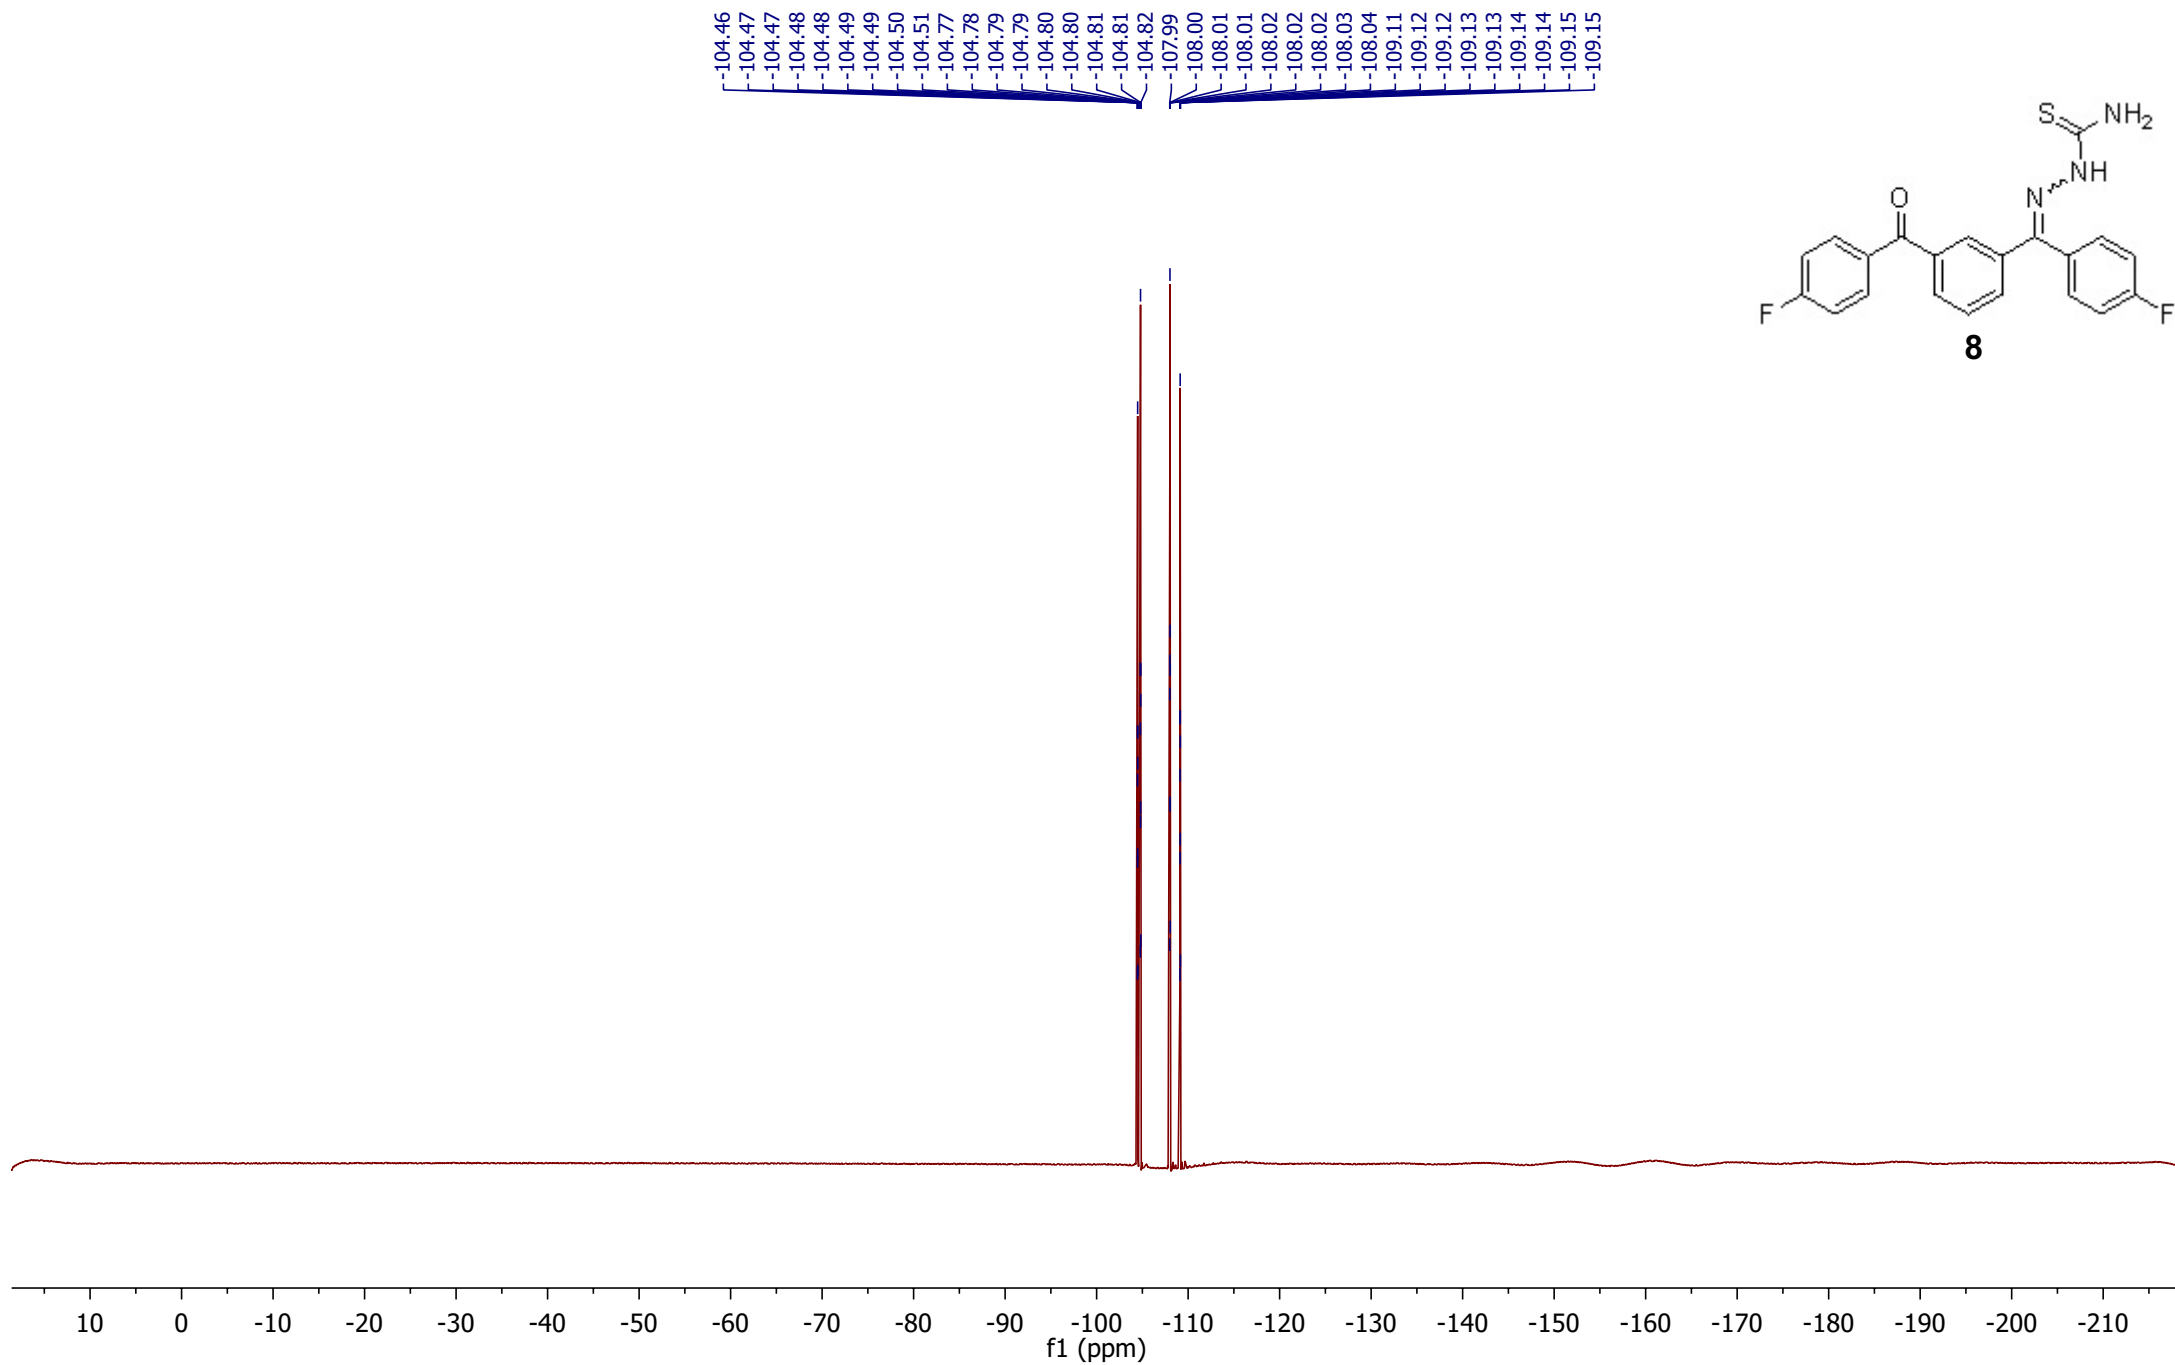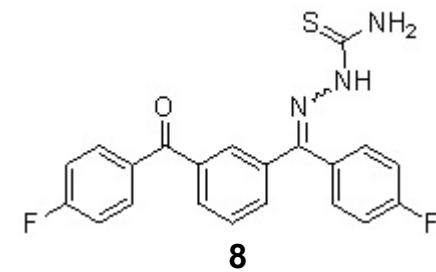

### HPLC trace for Compound 8

=====  
Acq. Operator : ERICAP  
Acq. Instrument : Instrument 1 Location : -  
Injection Date : 4/30/2014 7:01:47 PM  
Acq. Method : C:\CHEM32\1\METHODS\GRAD 2 50-90 ACN.M  
Last changed : 4/30/2014 6:49:33 PM by ERICAP  
Analysis Method : C:\CHEM32\1\DATA\ERICAP\KGP244000031.D\DA.M (GRAD 2 50-90 ACN.M)  
Last changed : 6/12/2014 9:58:06 PM by ERICAP  
Sample Info : KGP244

Method:

0-25 Min. 50:70 to 90:10 ACN:Water  
25-30 min 90:10 ACN:Water

Two peaks observed in the HPLC traces are due to the presence of both E and Z geometrical isomers.

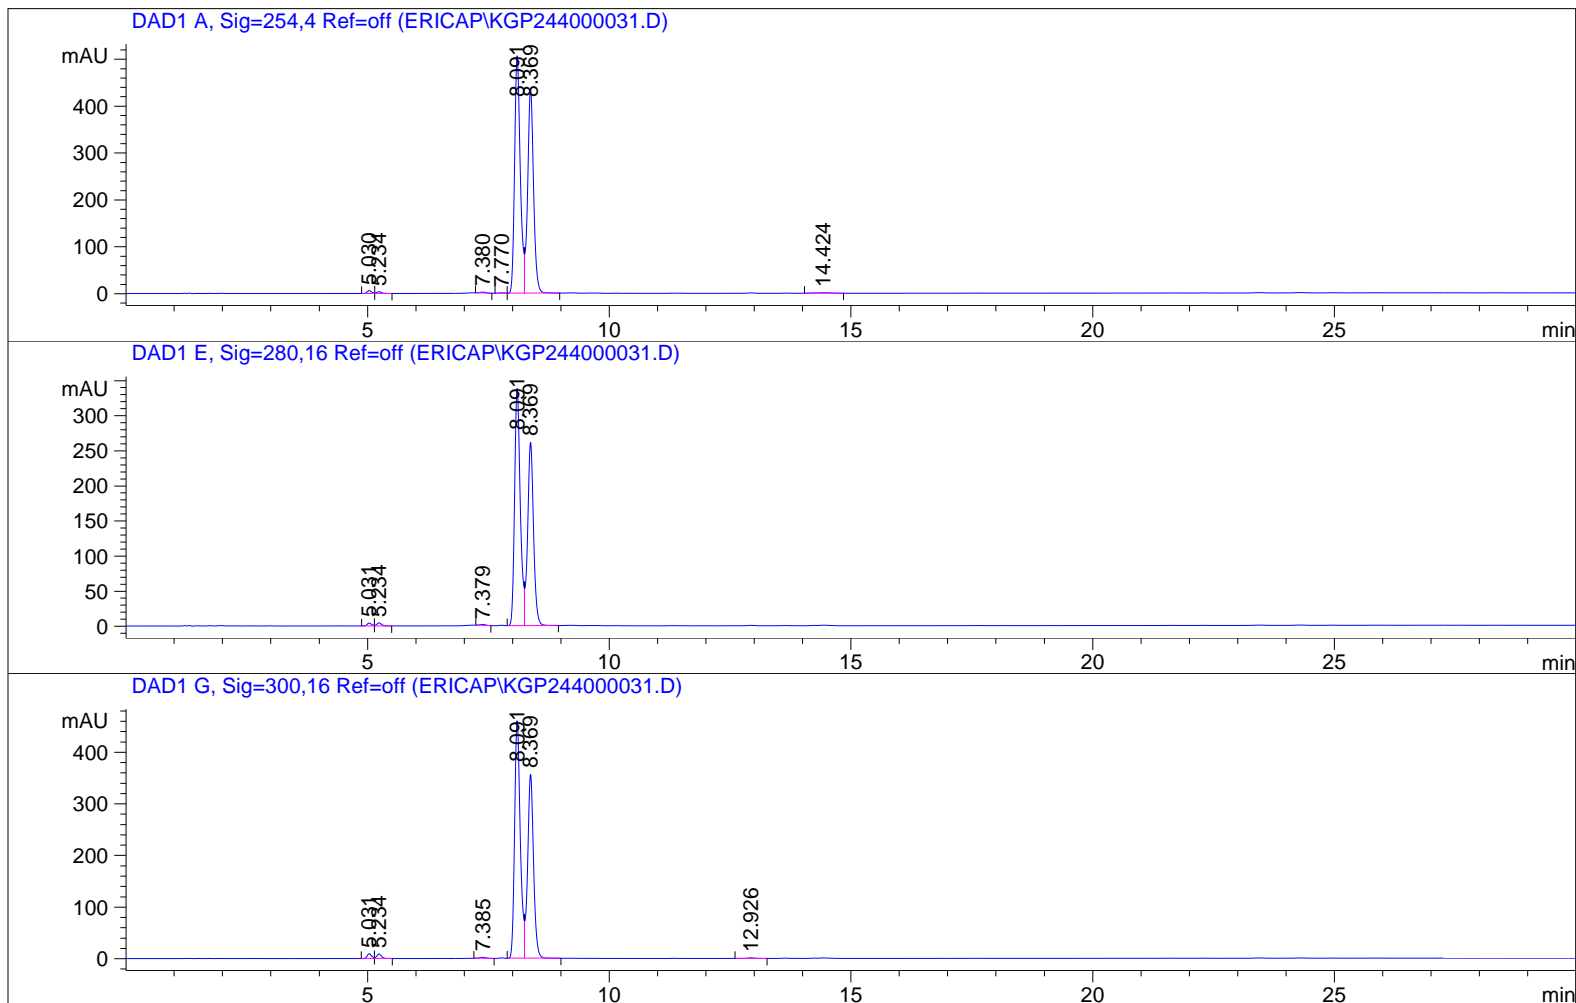

HPLC trace for Compound 8

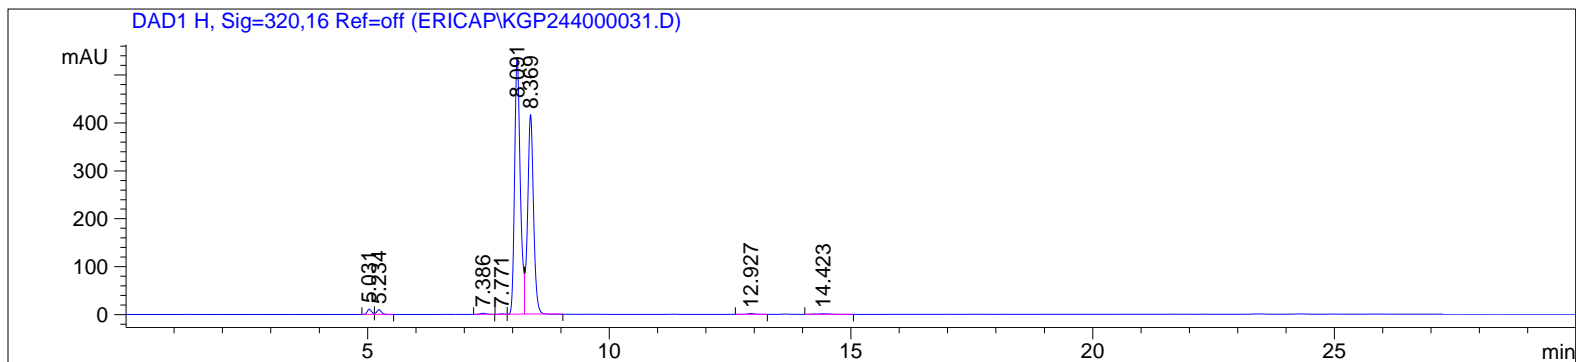

=====  
 Area Percent Report  
 =====

Sorted By : Signal  
 Multiplier : 1.0000  
 Dilution : 1.0000  
 Use Multiplier & Dilution Factor with ISTDs

Signal 1: DAD1 A, Sig=254,4 Ref=off

| Peak # | RetTime [min] | Type | Width [min] | Area [mAU*s] | Height [mAU] | Area %  |
|--------|---------------|------|-------------|--------------|--------------|---------|
| 1      | 5.030         | BV   | 0.0973      | 39.87519     | 6.17963      | 0.5025  |
| 2      | 5.234         | VB   | 0.1027      | 26.38915     | 3.81628      | 0.3326  |
| 3      | 7.380         | BB   | 0.1266      | 14.92891     | 1.88135      | 0.1881  |
| 4      | 7.770         | BV   | 0.1083      | 7.21967      | 1.04835      | 0.0910  |
| 5      | 8.091         | VV   | 0.1233      | 4137.96680   | 506.67725    | 52.1481 |
| 6      | 8.369         | VB   | 0.1284      | 3684.60937   | 436.77277    | 46.4348 |
| 7      | 14.424        | BB   | 0.2493      | 24.03401     | 1.26687      | 0.3029  |

Totals : 7935.02311 957.64250

Signal 2: DAD1 E, Sig=280,16 Ref=off

| Peak # | RetTime [min] | Type | Width [min] | Area [mAU*s] | Height [mAU] | Area %  |
|--------|---------------|------|-------------|--------------|--------------|---------|
| 1      | 5.031         | BV   | 0.0975      | 26.57289     | 4.10678      | 0.5277  |
| 2      | 5.234         | VB   | 0.1015      | 30.19439     | 4.42914      | 0.5996  |
| 3      | 7.379         | BB   | 0.1236      | 10.06317     | 1.28235      | 0.1998  |
| 4      | 8.091         | VV   | 0.1231      | 2759.27563   | 338.43115    | 54.7979 |
| 5      | 8.369         | VB   | 0.1286      | 2209.25806   | 261.37827    | 43.8748 |

Totals : 5035.36414 609.62768

Signal 3: DAD1 G, Sig=300,16 Ref=off

Sample Name: KGP244

## HPLC trace for Compound 8

| Peak # | RetTime [min] | Type | Width [min] | Area [mAU*s] | Height [mAU] | Area %  |
|--------|---------------|------|-------------|--------------|--------------|---------|
| 1      | 5.031         | BV   | 0.0969      | 60.33349     | 9.40099      | 0.8712  |
| 2      | 5.234         | VB   | 0.1010      | 61.07416     | 9.01911      | 0.8819  |
| 3      | 7.385         | BB   | 0.1292      | 15.99178     | 1.91966      | 0.2309  |
| 4      | 8.091         | VV   | 0.1232      | 3757.75464   | 460.61365    | 54.2599 |
| 5      | 8.369         | VB   | 0.1287      | 3018.68164   | 356.78674    | 43.5881 |
| 6      | 12.926        | BB   | 0.1531      | 11.63206     | 1.13920      | 0.1680  |

Totals : 6925.46778 838.87935

Signal 4: DAD1 H, Sig=320,16 Ref=off

| Peak # | RetTime [min] | Type | Width [min] | Area [mAU*s] | Height [mAU] | Area %  |
|--------|---------------|------|-------------|--------------|--------------|---------|
| 1      | 5.031         | BV   | 0.0968      | 70.38661     | 10.97993     | 0.8671  |
| 2      | 5.234         | VB   | 0.1010      | 68.74670     | 10.15010     | 0.8469  |
| 3      | 7.386         | BB   | 0.1342      | 19.21360     | 2.23756      | 0.2367  |
| 4      | 7.771         | BV   | 0.1095      | 7.10434      | 1.01688      | 0.0875  |
| 5      | 8.091         | VV   | 0.1232      | 4382.60156   | 536.96875    | 53.9870 |
| 6      | 8.369         | VB   | 0.1288      | 3529.76855   | 416.80865    | 43.4814 |
| 7      | 12.927        | BB   | 0.1527      | 17.24854     | 1.72506      | 0.2125  |
| 8      | 14.423        | BB   | 0.2519      | 22.81199     | 1.19943      | 0.2810  |

Totals : 8117.88189 981.08637

=====  
\*\*\* End of Report \*\*\*



# HRMS (ESI) for Compound 8

C:\Xcalibur\...song\01-28-13\GDK-III-70

1/28/2013 8:31:55 PM

GDK-III-70 #1276 RT: 15.53 AV: 1 NL: 1.18E8  
T: FTMS + p ESI Full ms [200.00-1000.00]

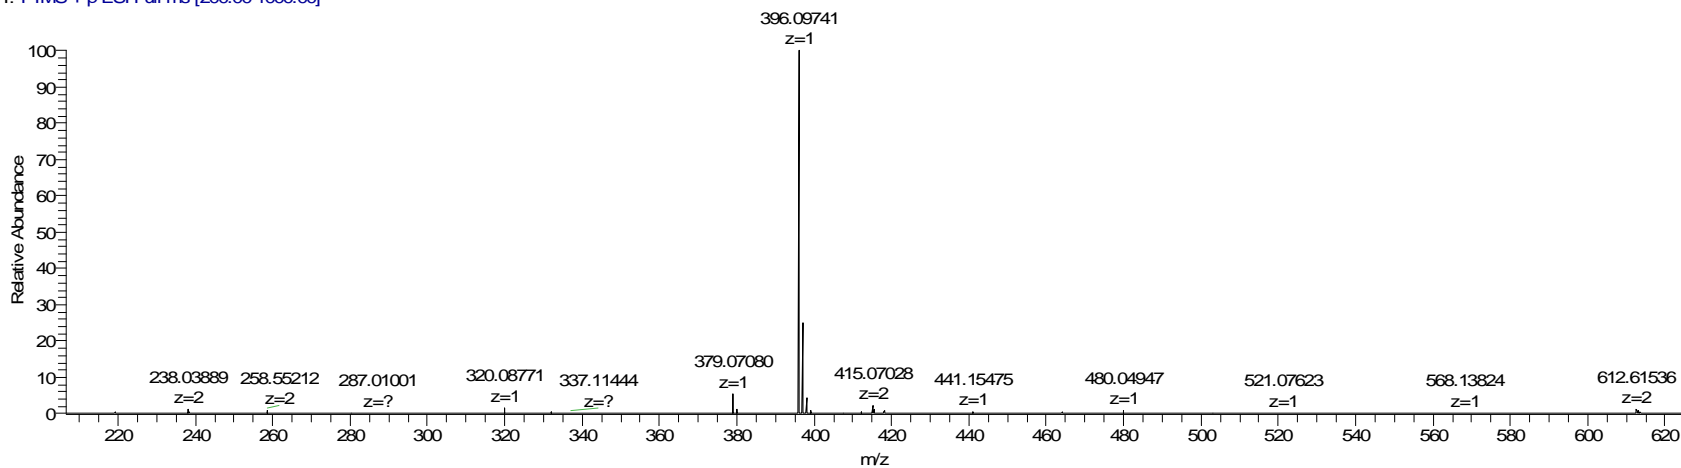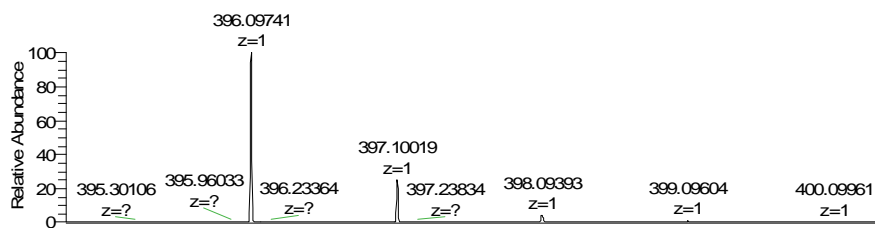

NL:  
1.18E8  
GDK-III-70#1276 RT:  
15.53 AV: 1 T:  
FTMS + p ESI Full  
ms [200.00-1000.00]

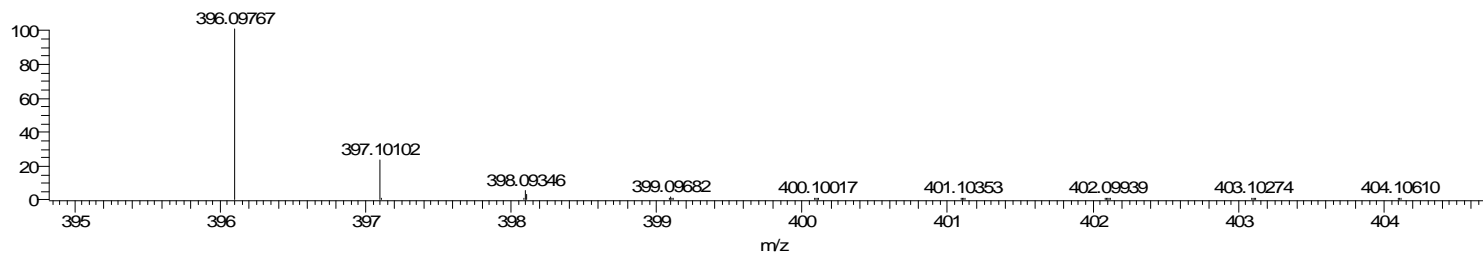

NL:  
7.46E5  
C<sub>21</sub>H<sub>6</sub>F<sub>2</sub>N<sub>3</sub>OS+H  
C<sub>21</sub>H<sub>6</sub>F<sub>2</sub>N<sub>3</sub>O<sub>1</sub>S<sub>1</sub>  
pa Chrg 1

<sup>1</sup>H NMR (500 MHz, DMSO-d<sub>6</sub>) of Compound **9**

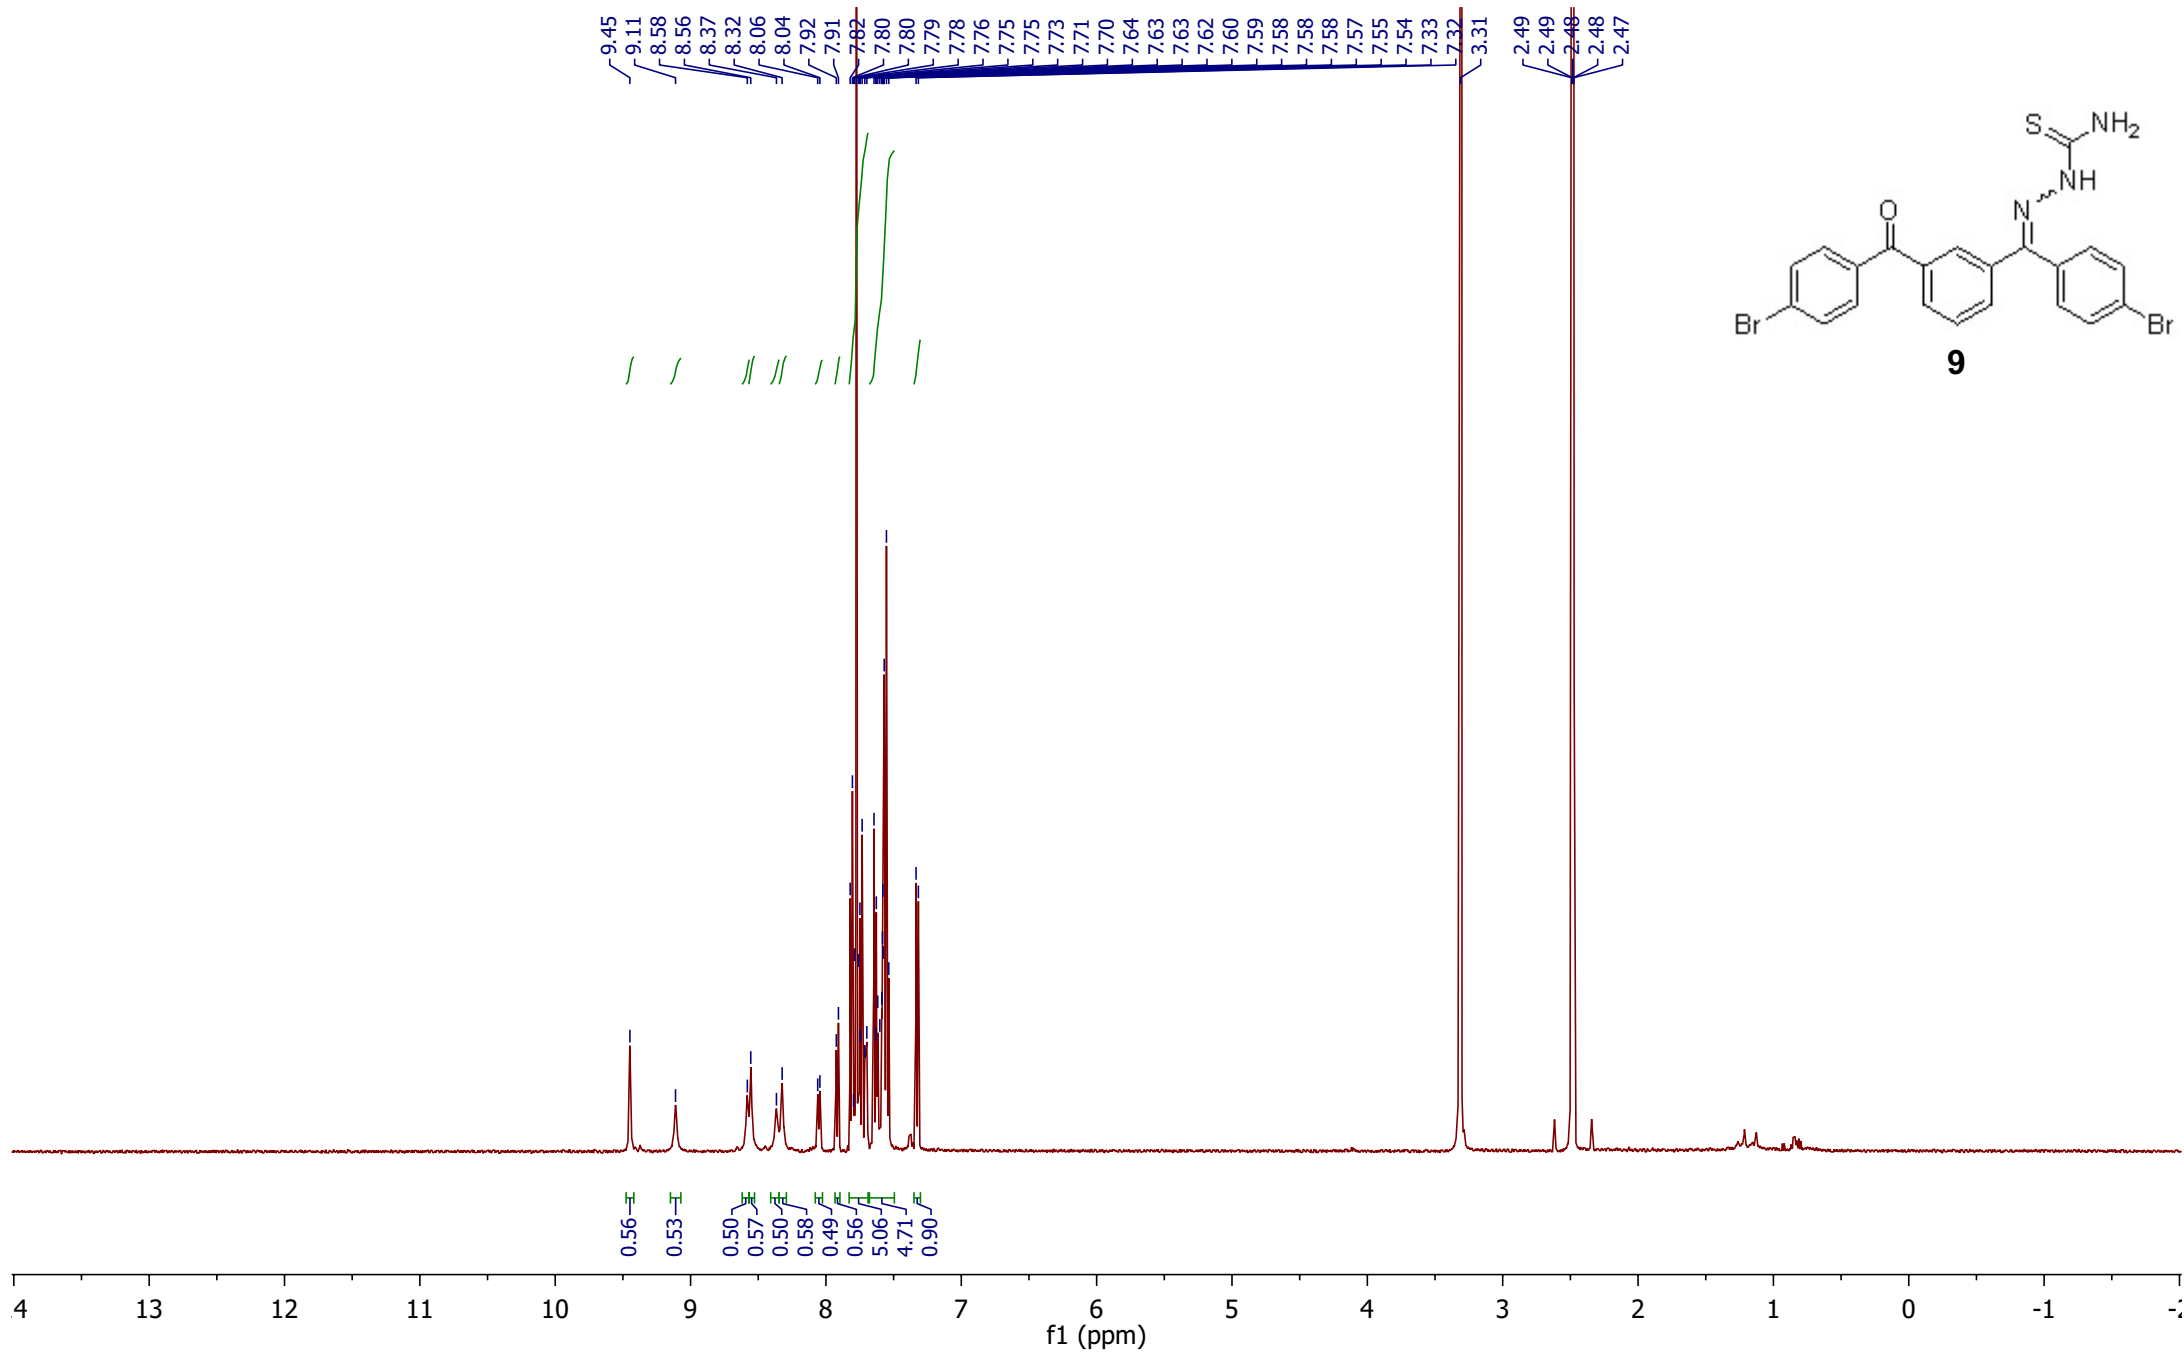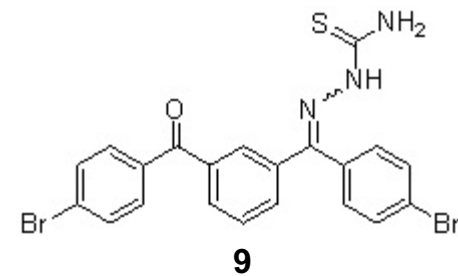

<sup>13</sup>C NMR (125 MHz, DMSO-d<sub>6</sub>) of Compound **9**

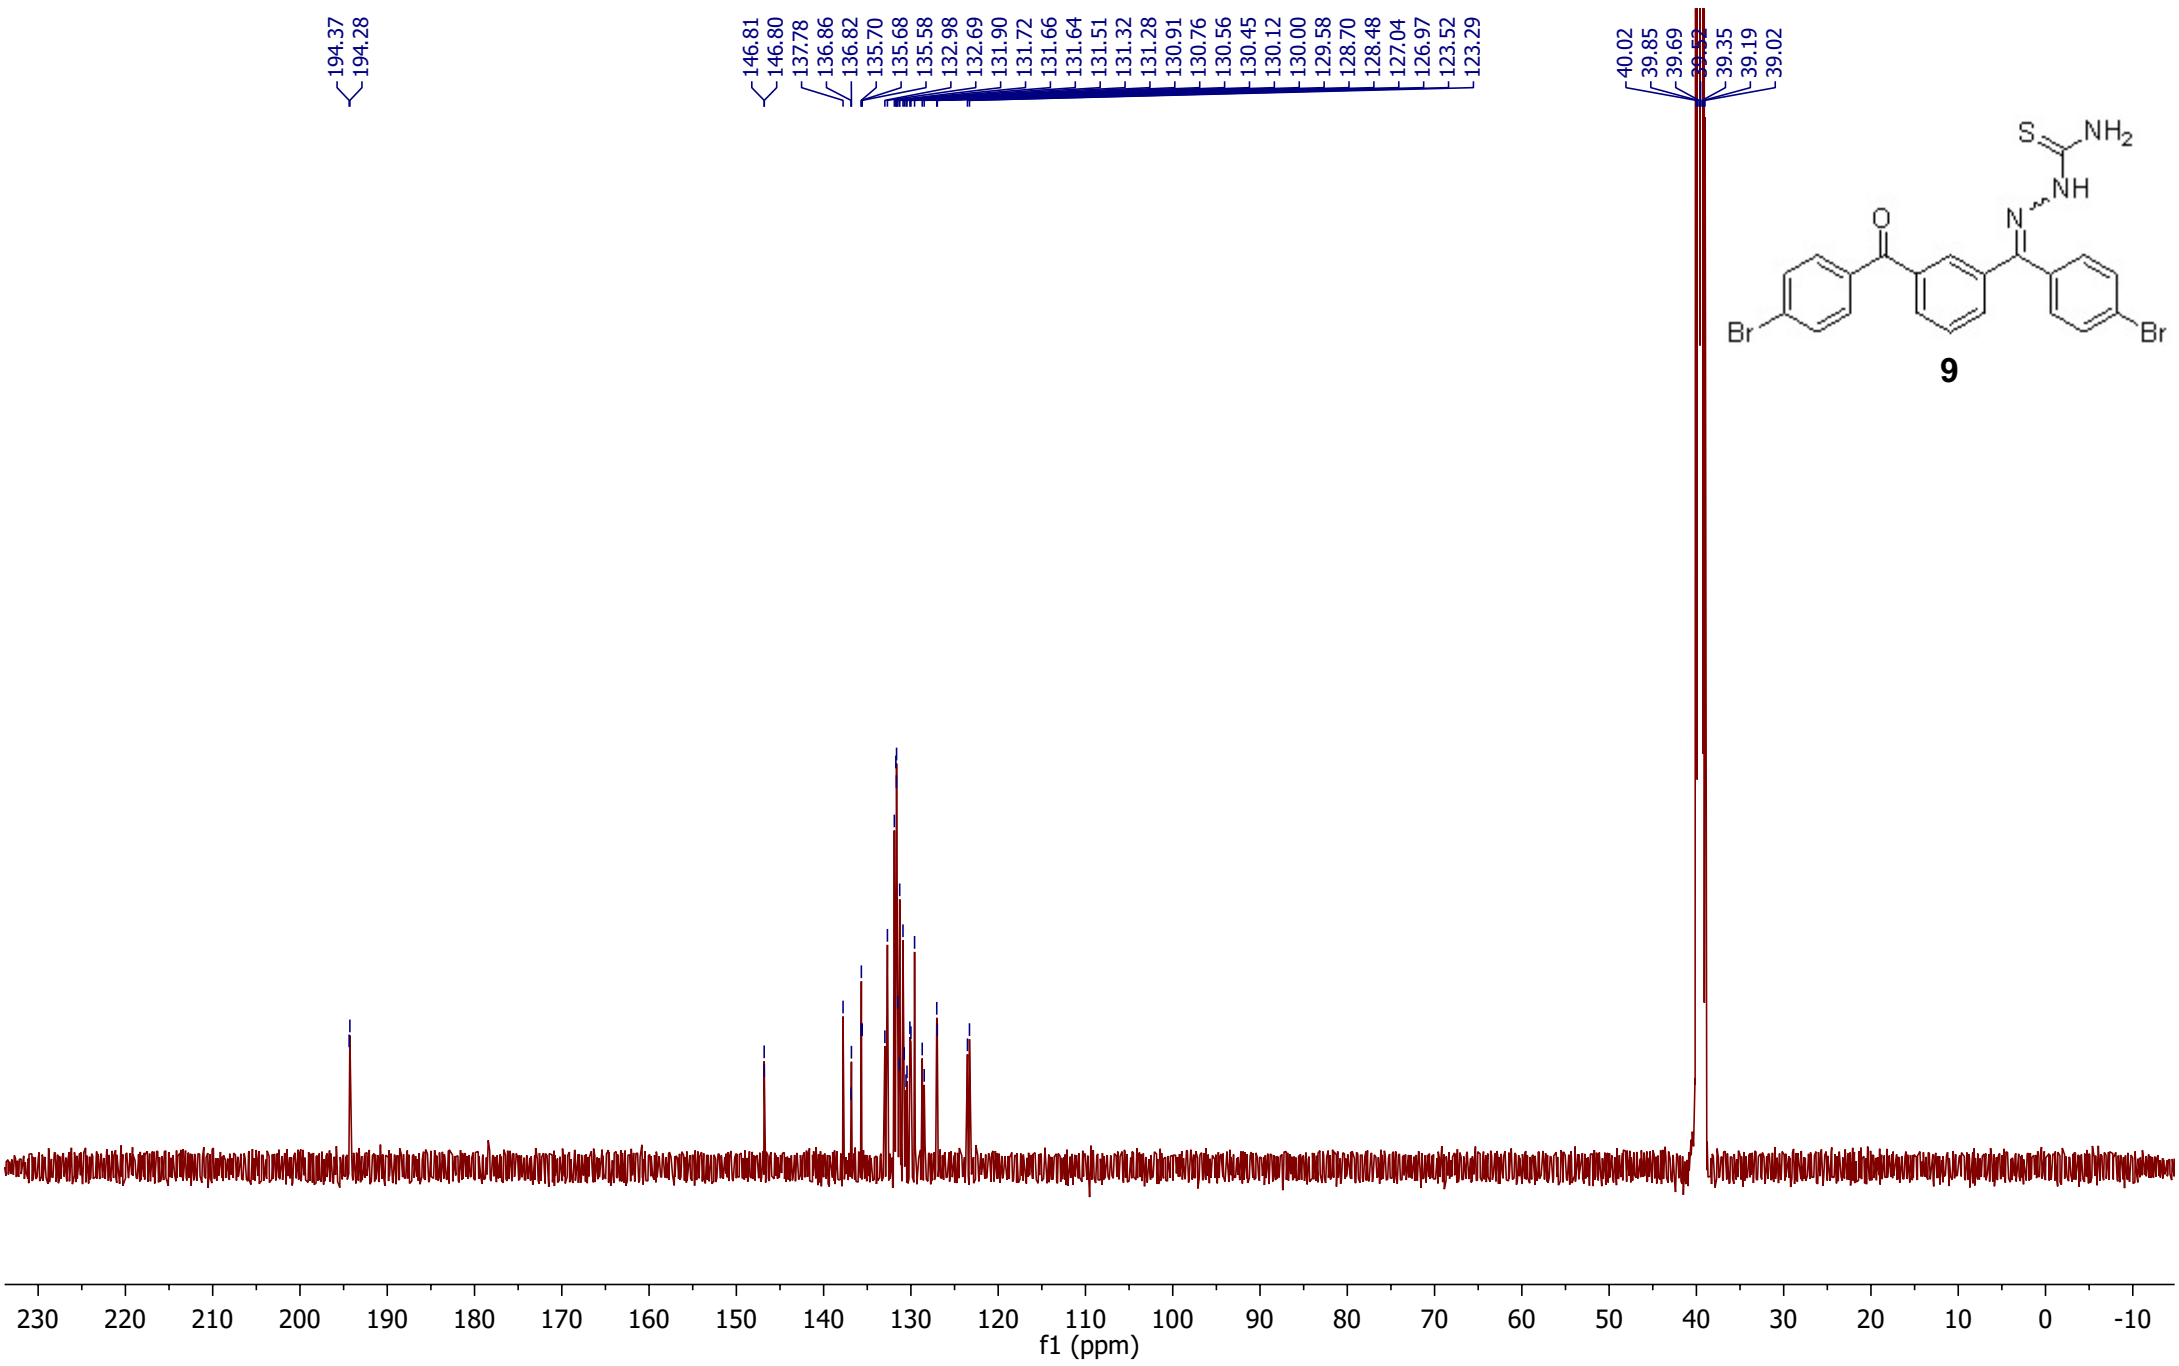

194.37  
194.28

146.81  
146.80  
137.78  
136.86  
136.82  
135.70  
135.68  
135.58  
132.98  
132.69  
131.90  
131.72  
131.66  
131.64  
131.51  
131.32  
131.28  
130.91  
130.76  
130.56  
130.45  
130.12  
130.00  
129.58  
128.70  
128.48  
127.04  
126.97  
123.52  
123.29

40.02  
39.85  
39.69  
39.52  
39.35  
39.19  
39.02

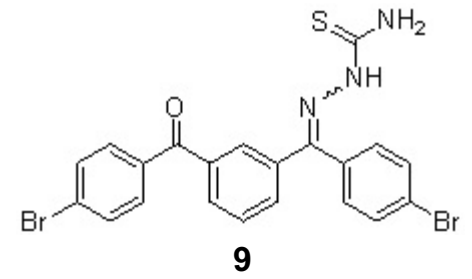

## HPLC trace for Compound 9

=====  
Acq. Operator : ERICAP  
Acq. Instrument : Instrument 1 Location : -  
Injection Date : 5/6/2014 6:35:52 PM  
Acq. Method : C:\CHEM32\1\METHODS\GRAD 2 50-90 ACN.M  
Last changed : 5/6/2014 5:33:52 PM by ERICAP  
Analysis Method : C:\CHEM32\1\DATA\ERICAP\ENPIV59000030.D\DA.M (GRAD 2 50-90 ACN.M)  
Last changed : 6/12/2014 9:28:34 PM by ERICAP  
(modified after loading)  
Sample Info : ENP-IV-59

## Method:

0-25 Min. 50:70 to 90:10 ACN:Water  
25-30 min 90:10 ACN:Water

Two peaks observed in the HPLC traces are due to the presence of both E and Z geometrical isomers.

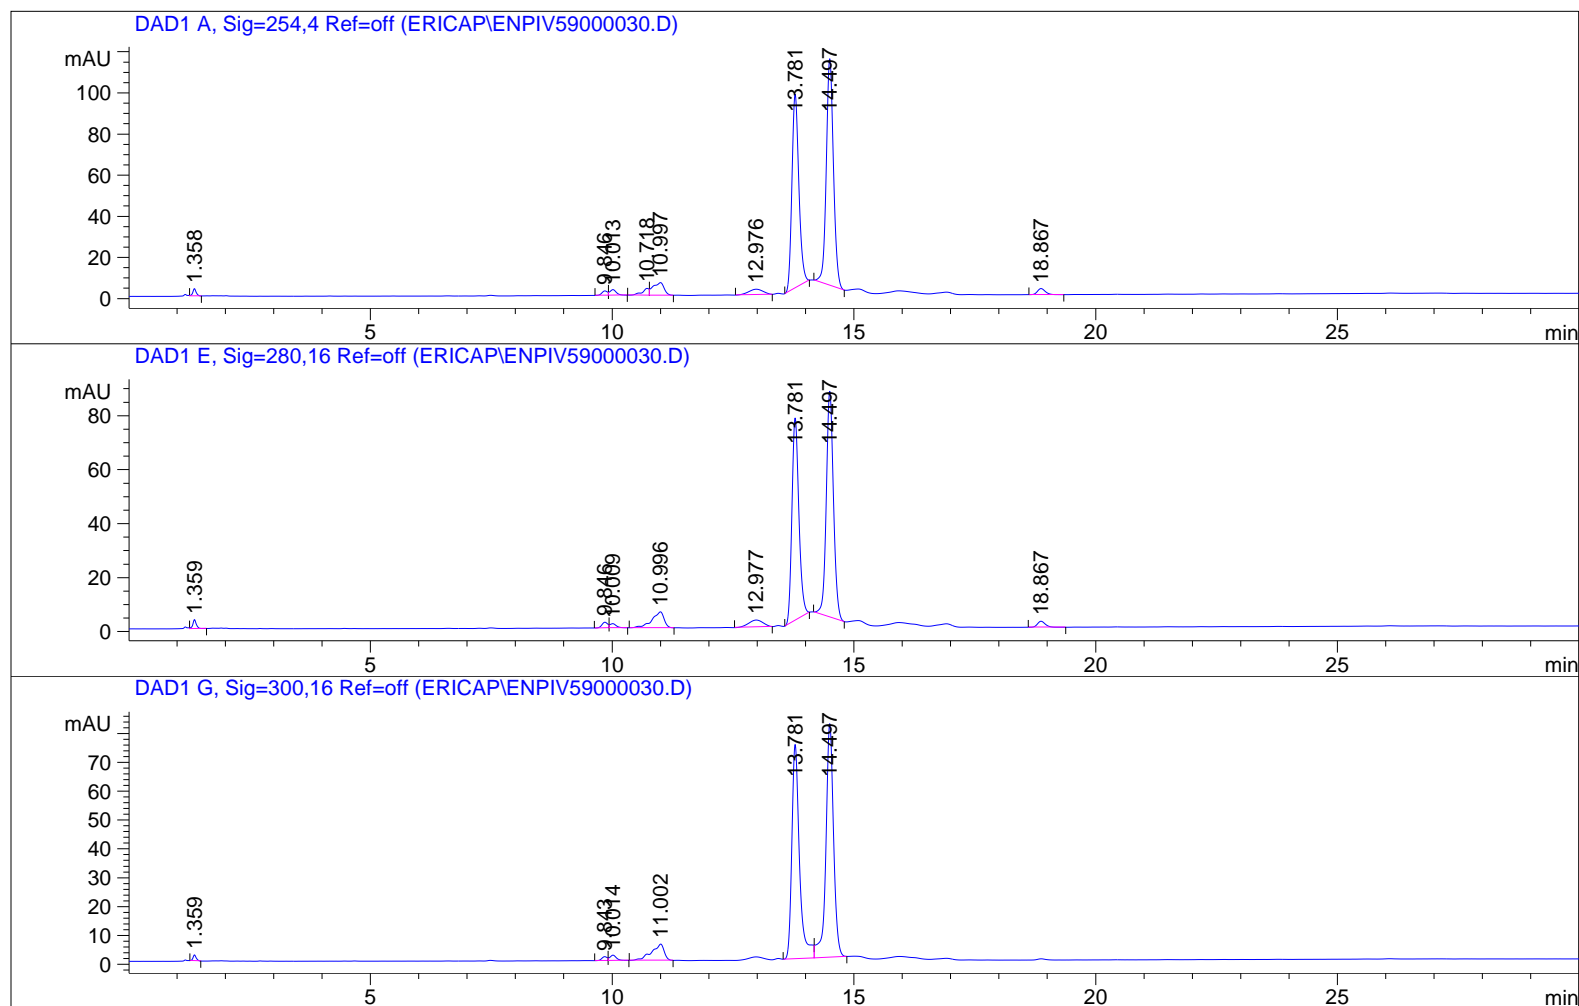

HPLC trace for Compound 9

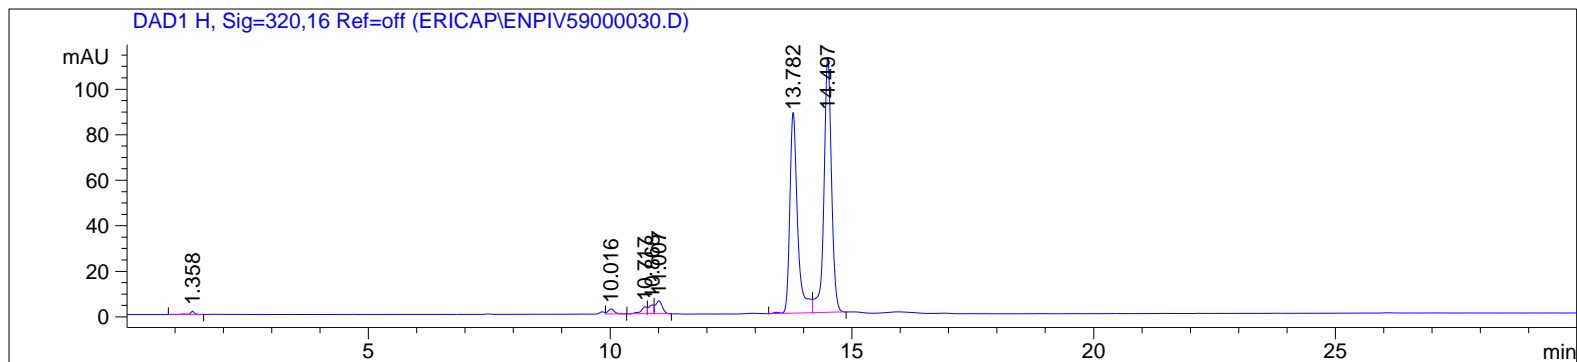

=====  
 Area Percent Report  
 =====

Sorted By : Signal  
 Multiplier : 1.0000  
 Dilution : 1.0000  
 Use Multiplier & Dilution Factor with ISTDs

Signal 1: DAD1 A, Sig=254,4 Ref=off

| Peak # | RetTime [min] | Type | Width [min] | Area [mAU*s] | Height [mAU] | Area %  |
|--------|---------------|------|-------------|--------------|--------------|---------|
| 1      | 1.358         | VB   | 0.0737      | 17.79614     | 3.59831      | 0.7590  |
| 2      | 9.846         | BV   | 0.1214      | 17.20547     | 2.14990      | 0.7338  |
| 3      | 10.013        | VB   | 0.1370      | 25.15250     | 2.74306      | 1.0728  |
| 4      | 10.718        | BV   | 0.1400      | 32.79762     | 3.29833      | 1.3988  |
| 5      | 10.997        | VB   | 0.2147      | 95.89358     | 6.12182      | 4.0899  |
| 6      | 12.976        | BB   | 0.3234      | 54.48132     | 2.63350      | 2.3236  |
| 7      | 13.781        | BB   | 0.1541      | 939.08997    | 94.33542     | 40.0525 |
| 8      | 14.497        | BB   | 0.1555      | 1129.07703   | 110.24906    | 48.1555 |
| 9      | 18.867        | BB   | 0.1709      | 33.15601     | 2.95592      | 1.4141  |

Totals : 2344.64962 228.08533

Signal 2: DAD1 E, Sig=280,16 Ref=off

| Peak # | RetTime [min] | Type | Width [min] | Area [mAU*s] | Height [mAU] | Area %  |
|--------|---------------|------|-------------|--------------|--------------|---------|
| 1      | 1.359         | VB   | 0.0720      | 16.53173     | 3.32318      | 0.9008  |
| 2      | 9.846         | BV   | 0.1298      | 17.96309     | 2.10092      | 0.9788  |
| 3      | 10.009        | VB   | 0.1283      | 13.53448     | 1.54282      | 0.7375  |
| 4      | 10.996        | BB   | 0.2358      | 103.06053    | 5.90035      | 5.6157  |
| 5      | 12.977        | BB   | 0.3234      | 54.22454     | 2.59896      | 2.9547  |
| 6      | 13.781        | BB   | 0.1538      | 745.04364    | 75.03146     | 40.5972 |
| 7      | 14.497        | BB   | 0.1558      | 860.08588    | 83.73415     | 46.8659 |
| 8      | 18.867        | BB   | 0.1723      | 24.76358     | 2.21701      | 1.3494  |

Totals : 1835.20747 176.44885

### HPLC trace for Compound 9

Signal 3: DAD1 G, Sig=300,16 Ref=off

| Peak # | RetTime [min] | Type | Width [min] | Area [mAU*s] | Height [mAU] | Area %  |
|--------|---------------|------|-------------|--------------|--------------|---------|
| 1      | 1.359         | BB   | 0.0673      | 9.28621      | 2.03340      | 0.5024  |
| 2      | 9.843         | BV   | 0.1200      | 10.68927     | 1.35568      | 0.5783  |
| 3      | 10.014        | VB   | 0.1362      | 16.94087     | 1.86086      | 0.9166  |
| 4      | 11.002        | BB   | 0.2427      | 102.95238    | 5.64647      | 5.5701  |
| 5      | 13.781        | BV   | 0.1664      | 817.20447    | 74.26231     | 44.2138 |
| 6      | 14.497        | VB   | 0.1644      | 891.22760    | 80.97018     | 48.2188 |

Totals : 1848.30080 166.12891

Signal 4: DAD1 H, Sig=320,16 Ref=off

| Peak # | RetTime [min] | Type | Width [min] | Area [mAU*s] | Height [mAU] | Area %  |
|--------|---------------|------|-------------|--------------|--------------|---------|
| 1      | 1.358         | BB   | 0.0889      | 8.99925      | 1.43979      | 0.3819  |
| 2      | 10.016        | VB   | 0.1354      | 19.91768     | 2.20501      | 0.8451  |
| 3      | 10.717        | BV   | 0.1311      | 28.69333     | 3.12627      | 1.2175  |
| 4      | 10.868        | VV   | 0.1065      | 28.48808     | 3.93471      | 1.2088  |
| 5      | 11.007        | VB   | 0.1456      | 55.55571     | 5.70562      | 2.3573  |
| 6      | 13.782        | BV   | 0.1695      | 994.26270    | 88.20777     | 42.1881 |
| 7      | 14.497        | VB   | 0.1631      | 1220.81995   | 112.07932    | 51.8013 |

Totals : 2356.73668 216.69849

=====  
\*\*\* End of Report \*\*\*

# HRMS(ESI) for Compound 9

C:\Xcalibur\...ENP\_IV\_59\_Orbi\_+ESI

1/13/2015 4:48:56 PM

ENP\_IV\_59\_Orbi\_+ESI #4 RT: 0.05 AV: 1 NL: 3.87E4  
T: FTMS + p ESI Full ms [75.00-1000.00]

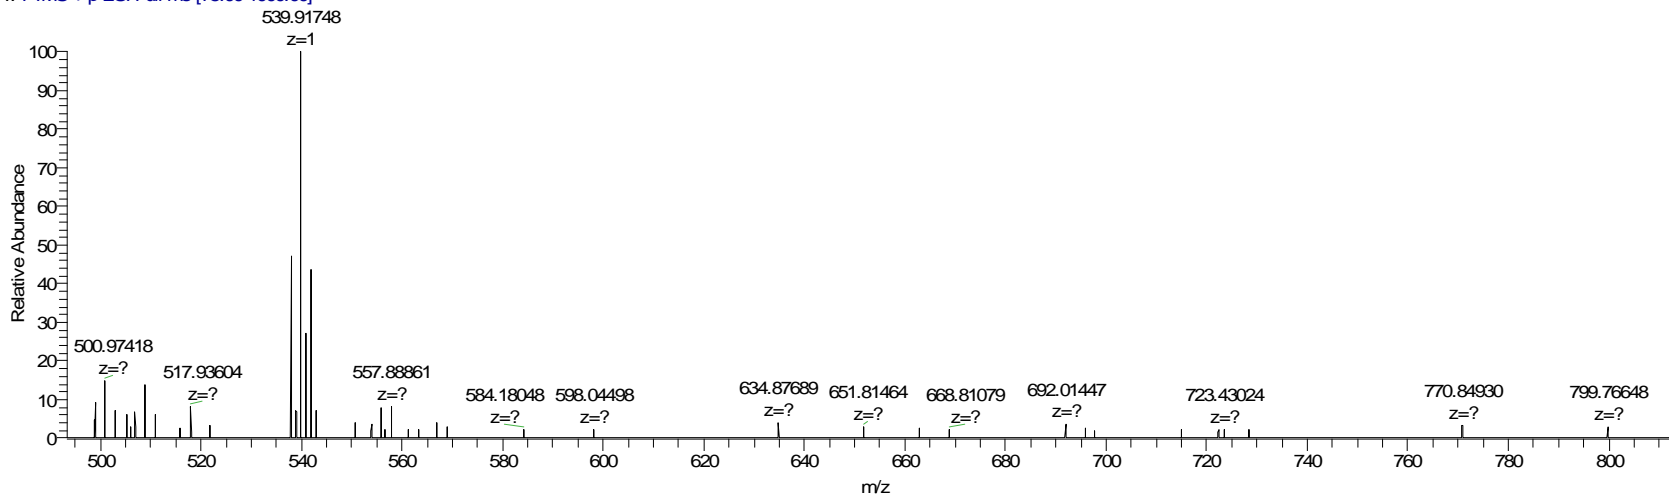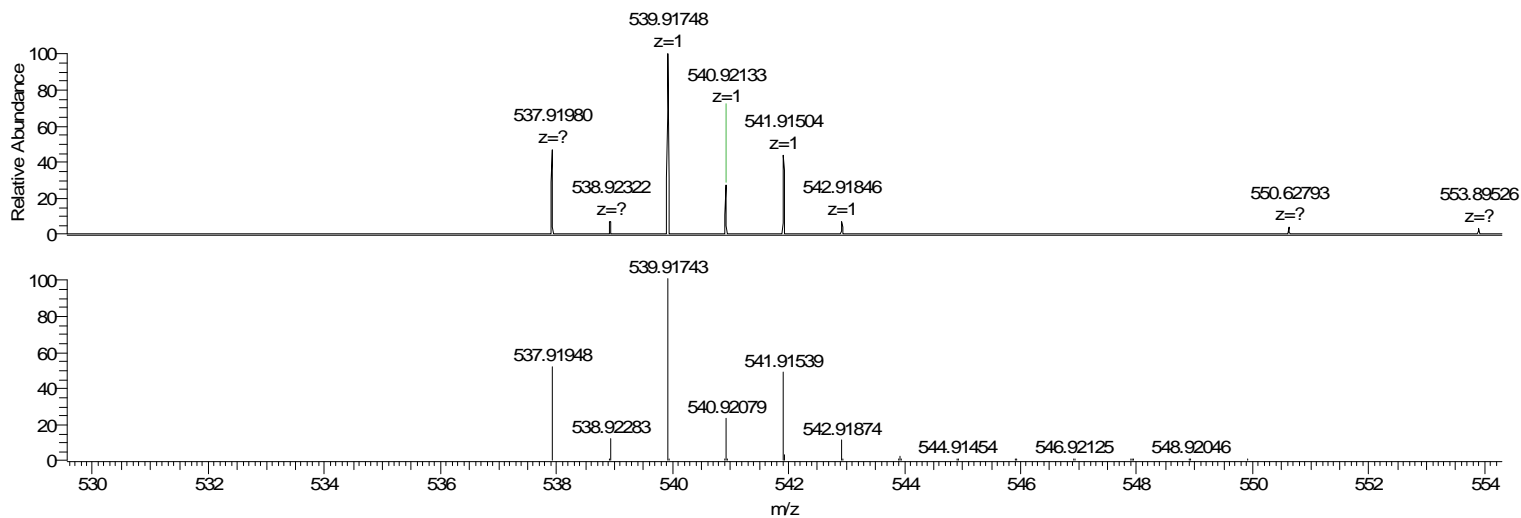

NL:  
3.87E4  
ENP\_IV\_59\_Orbi\_+  
ESI#4 RT: 0.05 AV: 1  
T: FTMS + p ESI Full  
ms [75.00-1000.00]

NL:  
3.73E5  
C<sub>21</sub>H<sub>6</sub>Br<sub>2</sub>N<sub>3</sub>OS +Na:  
C<sub>21</sub>H<sub>6</sub>Br<sub>2</sub>N<sub>3</sub>O<sub>1</sub>S<sub>1</sub>Na<sub>1</sub>  
pa Chrg 1

<sup>1</sup>H NMR (500 MHz, DMSO-d<sub>6</sub>) of Compound **10**

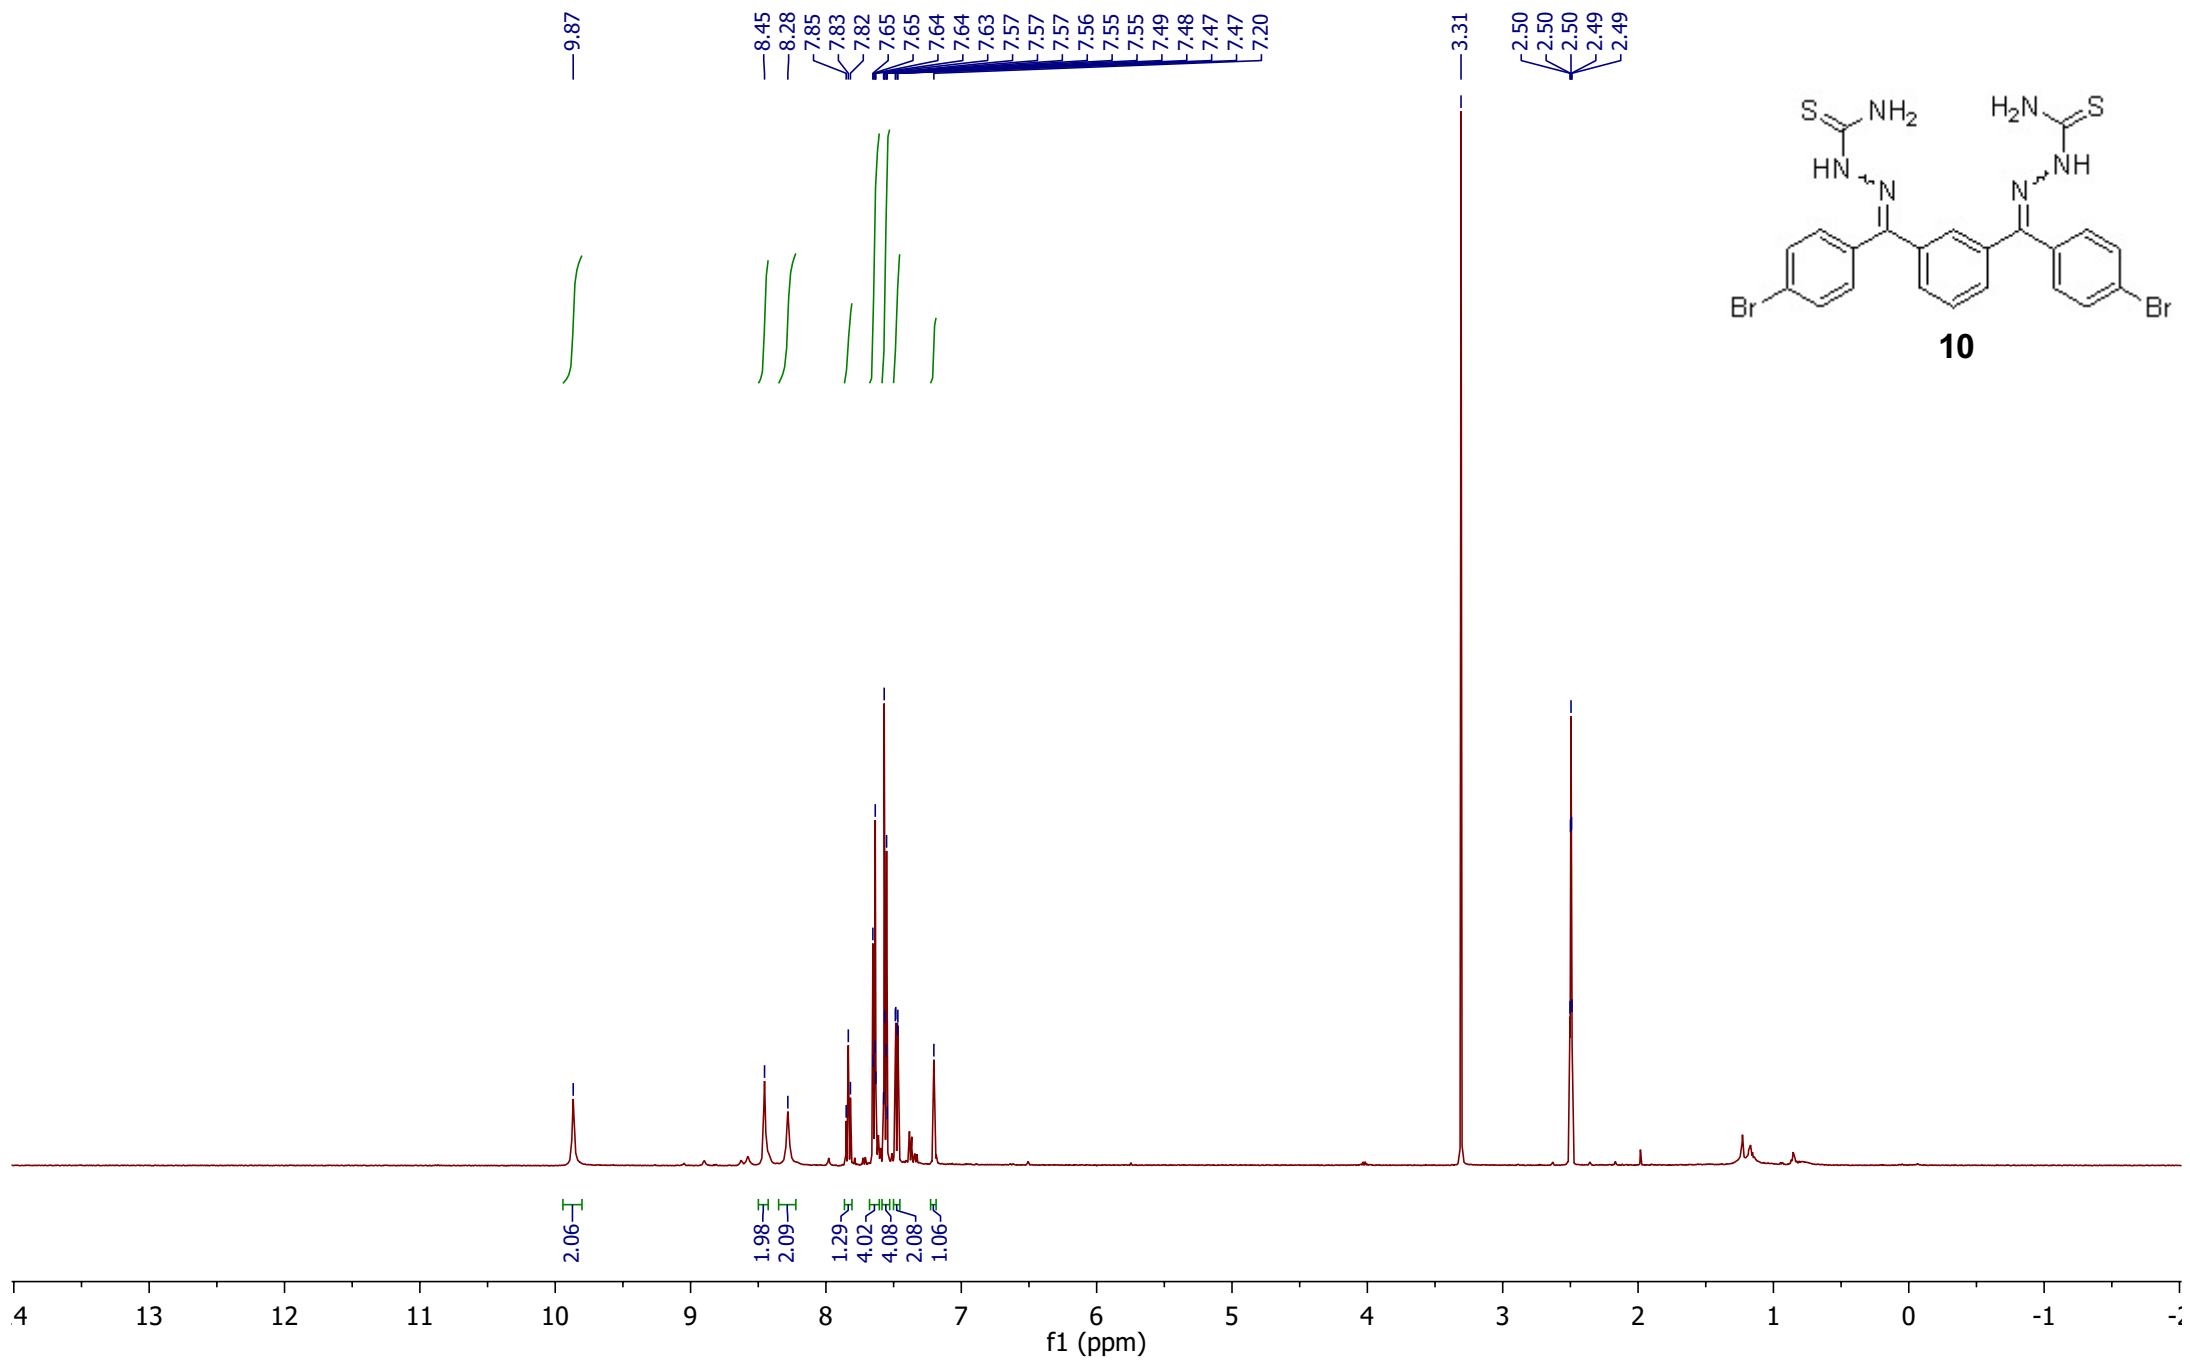



<sup>1</sup>H NMR (500 MHz, DMSO-d<sub>6</sub>) of Compound **10**

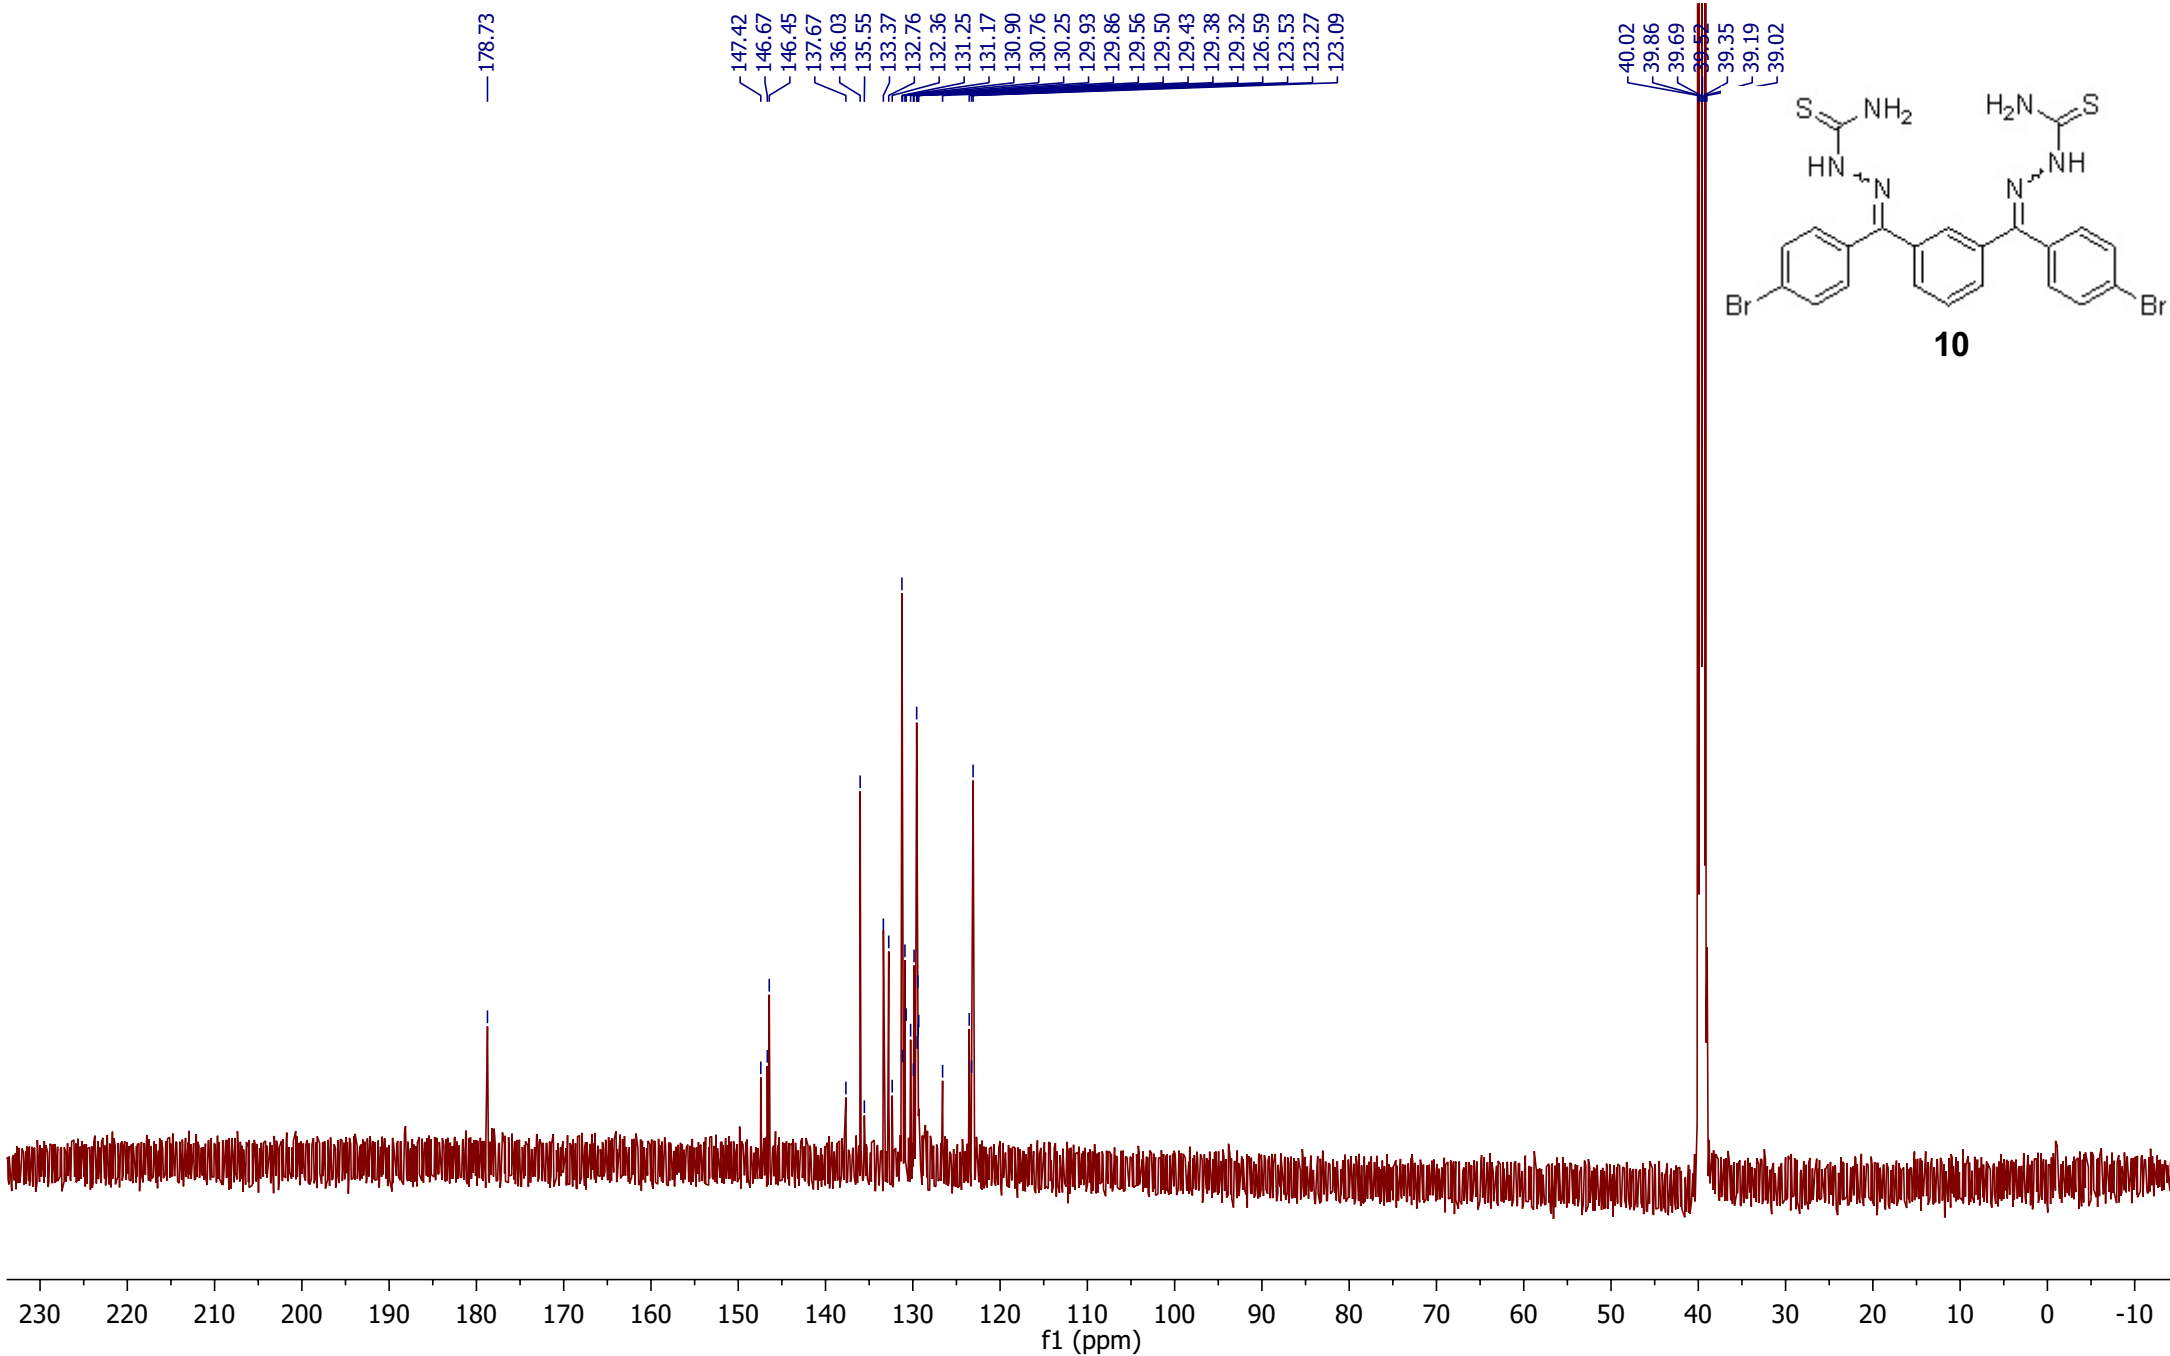

Sample Name: \_ARL\_I\_010R

### HPLC trace for Compound 10

=====

Acq. Operator : ERICAP  
Acq. Instrument : Instrument 1 Location : -  
Injection Date : 2/5/2015 2:49:23 AM  
Acq. Method : C:\CHEM32\1\METHODS\GRAD 2 50-90 ACN.M  
Last changed : 2/5/2015 2:49:15 AM by ERICAP  
Analysis Method : C:\CHEM32\1\DATA\ERICAP\\_ARL\_I\_010R0103.D\DA.M (GRAD 2 50-90 ACN.M)  
Last changed : 2/5/2015 3:32:22 AM by ERICAP  
(modified after loading)  
Sample Info : \_ARL\_I\_010R

Three peaks observed in the HPLC traces are due to the presence of three E/Z geometrical isomers.

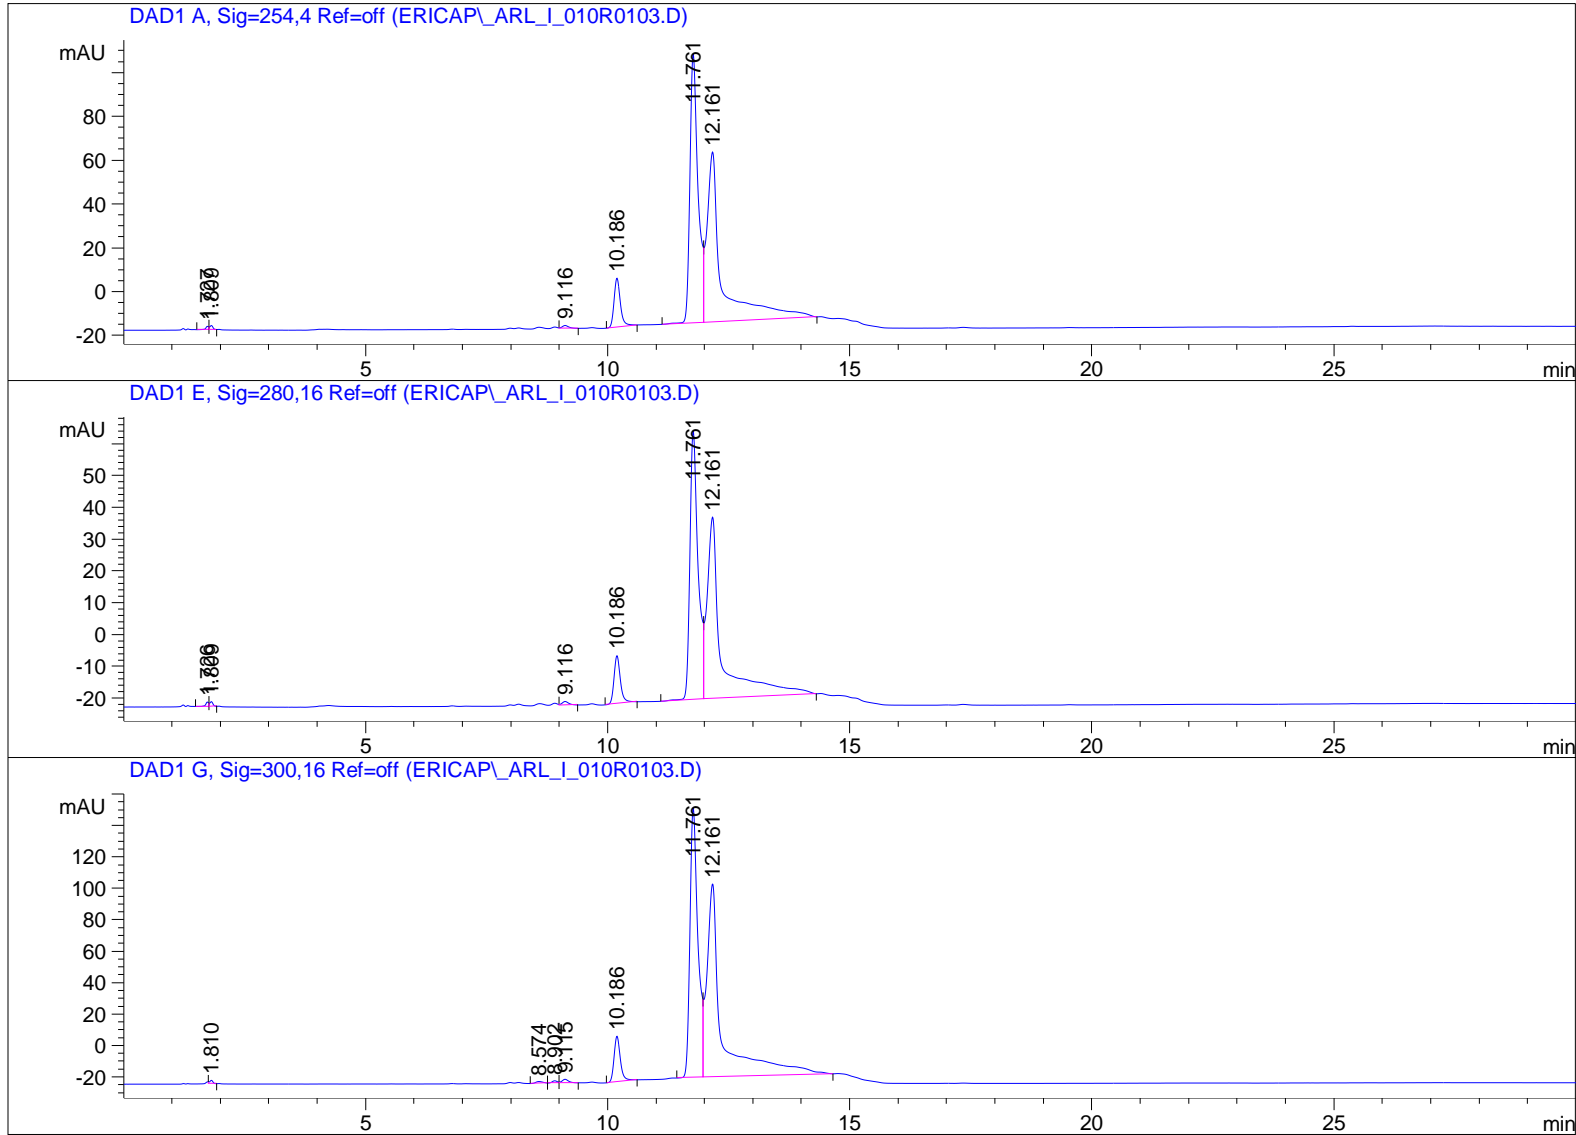

HPLC trace for Compound 10

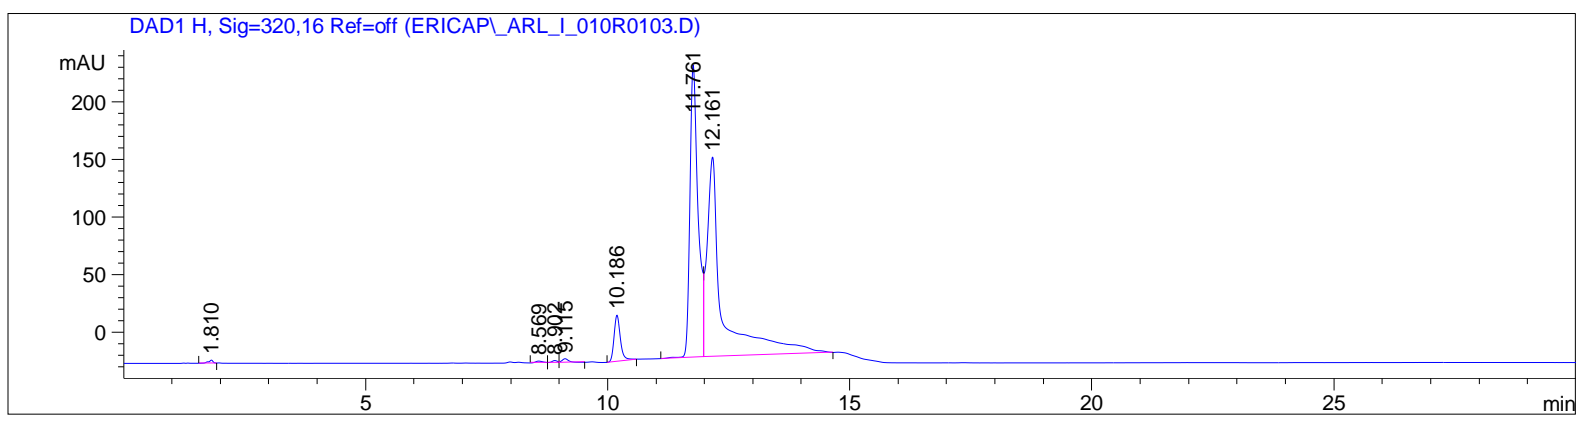

=====  
 Area Percent Report  
 =====

Sorted By : Signal  
 Multiplier : 1.0000  
 Dilution : 1.0000  
 Use Multiplier & Dilution Factor with ISTDs

Signal 1: DAD1 A, Sig=254,4 Ref=off

| Peak # | RetTime [min] | Type | Width [min] | Area [mAU*s] | Height [mAU] | Area %  |
|--------|---------------|------|-------------|--------------|--------------|---------|
| 1      | 1.727         | BV   | 0.0629      | 6.21257      | 1.48276      | 0.1843  |
| 2      | 1.809         | VB   | 0.0680      | 8.21576      | 1.84343      | 0.2438  |
| 3      | 9.116         | VB   | 0.1431      | 13.38051     | 1.38070      | 0.3970  |
| 4      | 10.186        | BB   | 0.1378      | 202.40236    | 22.31227     | 6.0051  |
| 5      | 11.761        | BV   | 0.1731      | 1442.30054   | 122.77618    | 42.7918 |
| 6      | 12.161        | VB   | 0.2975      | 1697.99292   | 77.54384     | 50.3780 |

Totals : 3370.50466 227.33917

Signal 2: DAD1 E, Sig=280,16 Ref=off

| Peak # | RetTime [min] | Type | Width [min] | Area [mAU*s] | Height [mAU] | Area %  |
|--------|---------------|------|-------------|--------------|--------------|---------|
| 1      | 1.726         | BV   | 0.0636      | 5.77921      | 1.35939      | 0.2432  |
| 2      | 1.809         | VB   | 0.0678      | 6.50234      | 1.46422      | 0.2736  |
| 3      | 9.116         | VB   | 0.1414      | 10.82703     | 1.13434      | 0.4556  |
| 4      | 10.186        | BB   | 0.1387      | 138.05728    | 15.08823     | 5.8100  |
| 5      | 11.761        | BV   | 0.1734      | 995.59772    | 84.54379     | 41.8990 |
| 6      | 12.161        | VB   | 0.2911      | 1219.42065   | 57.10430     | 51.3184 |

Totals : 2376.18423 160.69428

## HPLC trace for Compound 10

Signal 3: DAD1 G, Sig=300,16 Ref=off

| Peak # | RetTime [min] | Type | Width [min] | Area [mAU*s] | Height [mAU] | Area %  |
|--------|---------------|------|-------------|--------------|--------------|---------|
| 1      | 1.810         | VB   | 0.0700      | 10.04898     | 2.17284      | 0.2007  |
| 2      | 8.574         | BV   | 0.1697      | 12.81582     | 1.20885      | 0.2560  |
| 3      | 8.902         | VV   | 0.1208      | 11.98277     | 1.50651      | 0.2393  |
| 4      | 9.115         | VB   | 0.1402      | 22.26705     | 2.35807      | 0.4447  |
| 5      | 10.186        | BB   | 0.1376      | 262.58127    | 28.99889     | 5.2442  |
| 6      | 11.761        | BV   | 0.1725      | 2008.22327   | 171.65239    | 40.1079 |
| 7      | 12.161        | VB   | 0.2963      | 2679.13525   | 122.92649    | 53.5072 |

Totals : 5007.05441 330.82403

Signal 4: DAD1 H, Sig=320,16 Ref=off

| Peak # | RetTime [min] | Type | Width [min] | Area [mAU*s] | Height [mAU] | Area %  |
|--------|---------------|------|-------------|--------------|--------------|---------|
| 1      | 1.810         | BB   | 0.0895      | 16.34881     | 2.59416      | 0.2232  |
| 2      | 8.569         | BV   | 0.1562      | 15.61079     | 1.51521      | 0.2131  |
| 3      | 8.902         | VV   | 0.1207      | 14.34423     | 1.80600      | 0.1959  |
| 4      | 9.115         | VB   | 0.1421      | 31.51148     | 3.27852      | 0.4302  |
| 5      | 10.186        | BB   | 0.1370      | 360.24457    | 40.02496     | 4.9187  |
| 6      | 11.761        | BV   | 0.1734      | 2993.03223   | 254.07591    | 40.8661 |
| 7      | 12.161        | VB   | 0.3038      | 3892.90820   | 173.50217    | 53.1528 |

Totals : 7324.00031 476.79692

=====  
\*\*\* End of Report \*\*\*

# HRMS(ESI) for Compound 10

C:\Xcalibur...01-02-2015\ARL\_I\_010R

1/2/2015 10:39:16 PM

ARL\_I\_010R #311 RT: 3.88 AV: 1 NL: 4.40E5  
T: FTMS + p ESI Full ms [100.00-1000.00]

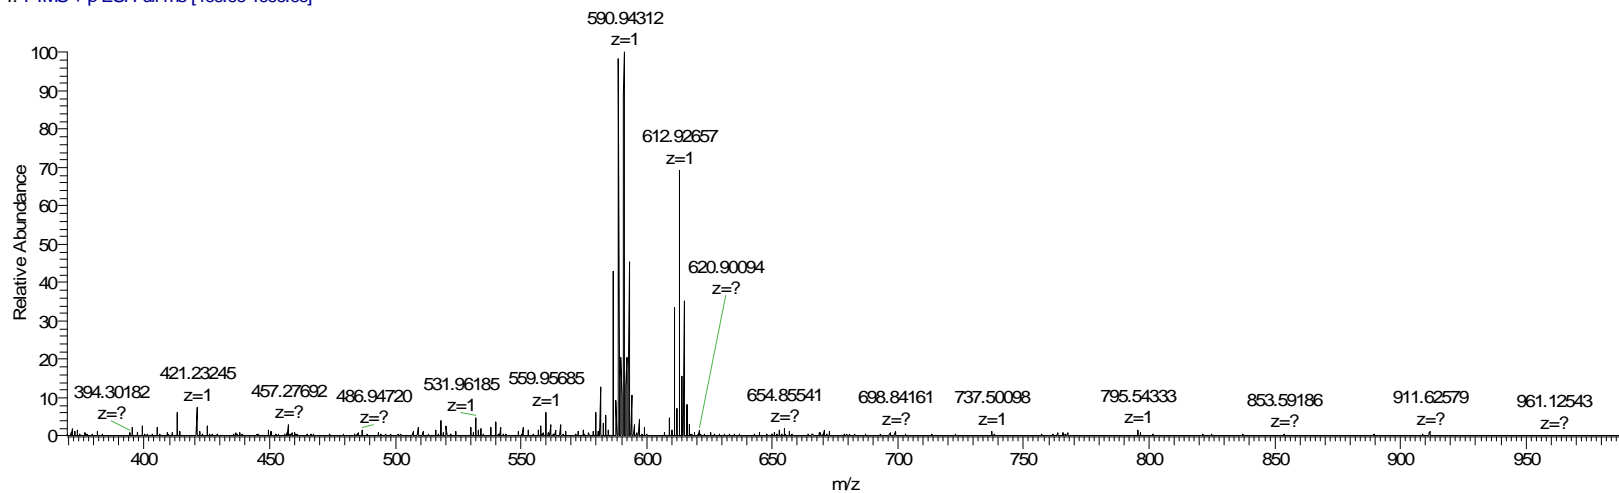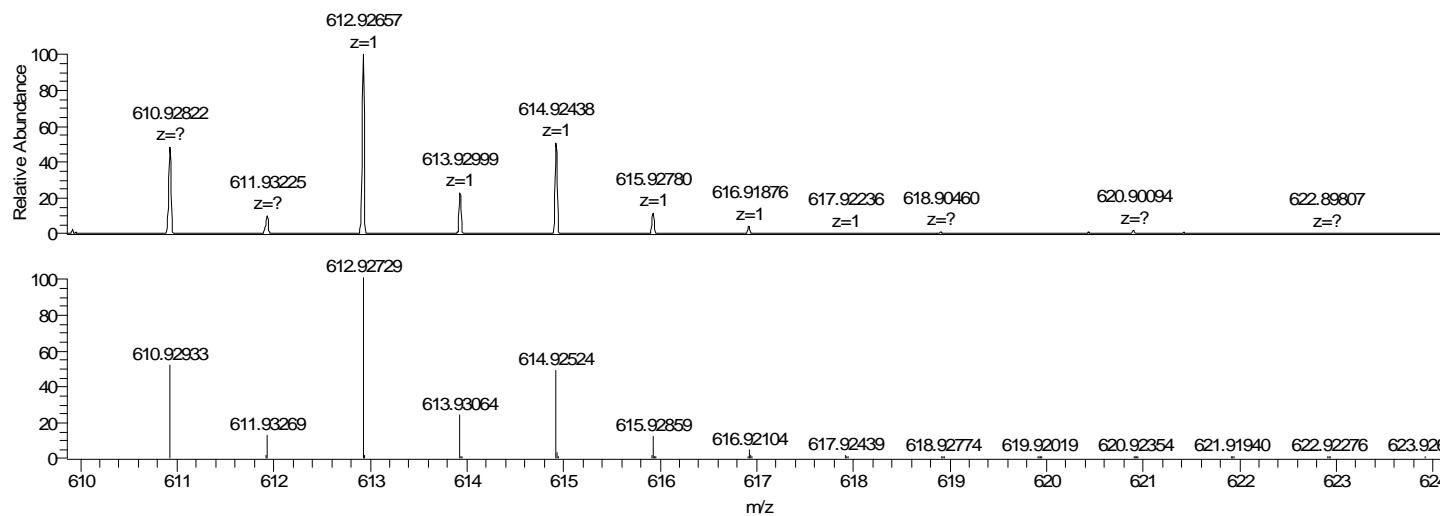

NL:  
3.06E5  
ARL\_I\_010R#311 RT:  
3.88 AV: 1 T: FTMS +  
p ESI Full ms  
[100.00-1000.00]

NL:  
3.47E5  
C<sub>22</sub>H<sub>18</sub>Br<sub>2</sub>N<sub>6</sub>S<sub>2</sub>+Na  
C<sub>22</sub>H<sub>18</sub>Br<sub>2</sub>N<sub>6</sub>S<sub>2</sub>Na<sub>1</sub>  
pa Chrg 1

<sup>1</sup>H NMR (500 MHz, CDCl<sub>3</sub>) of Compound **11**

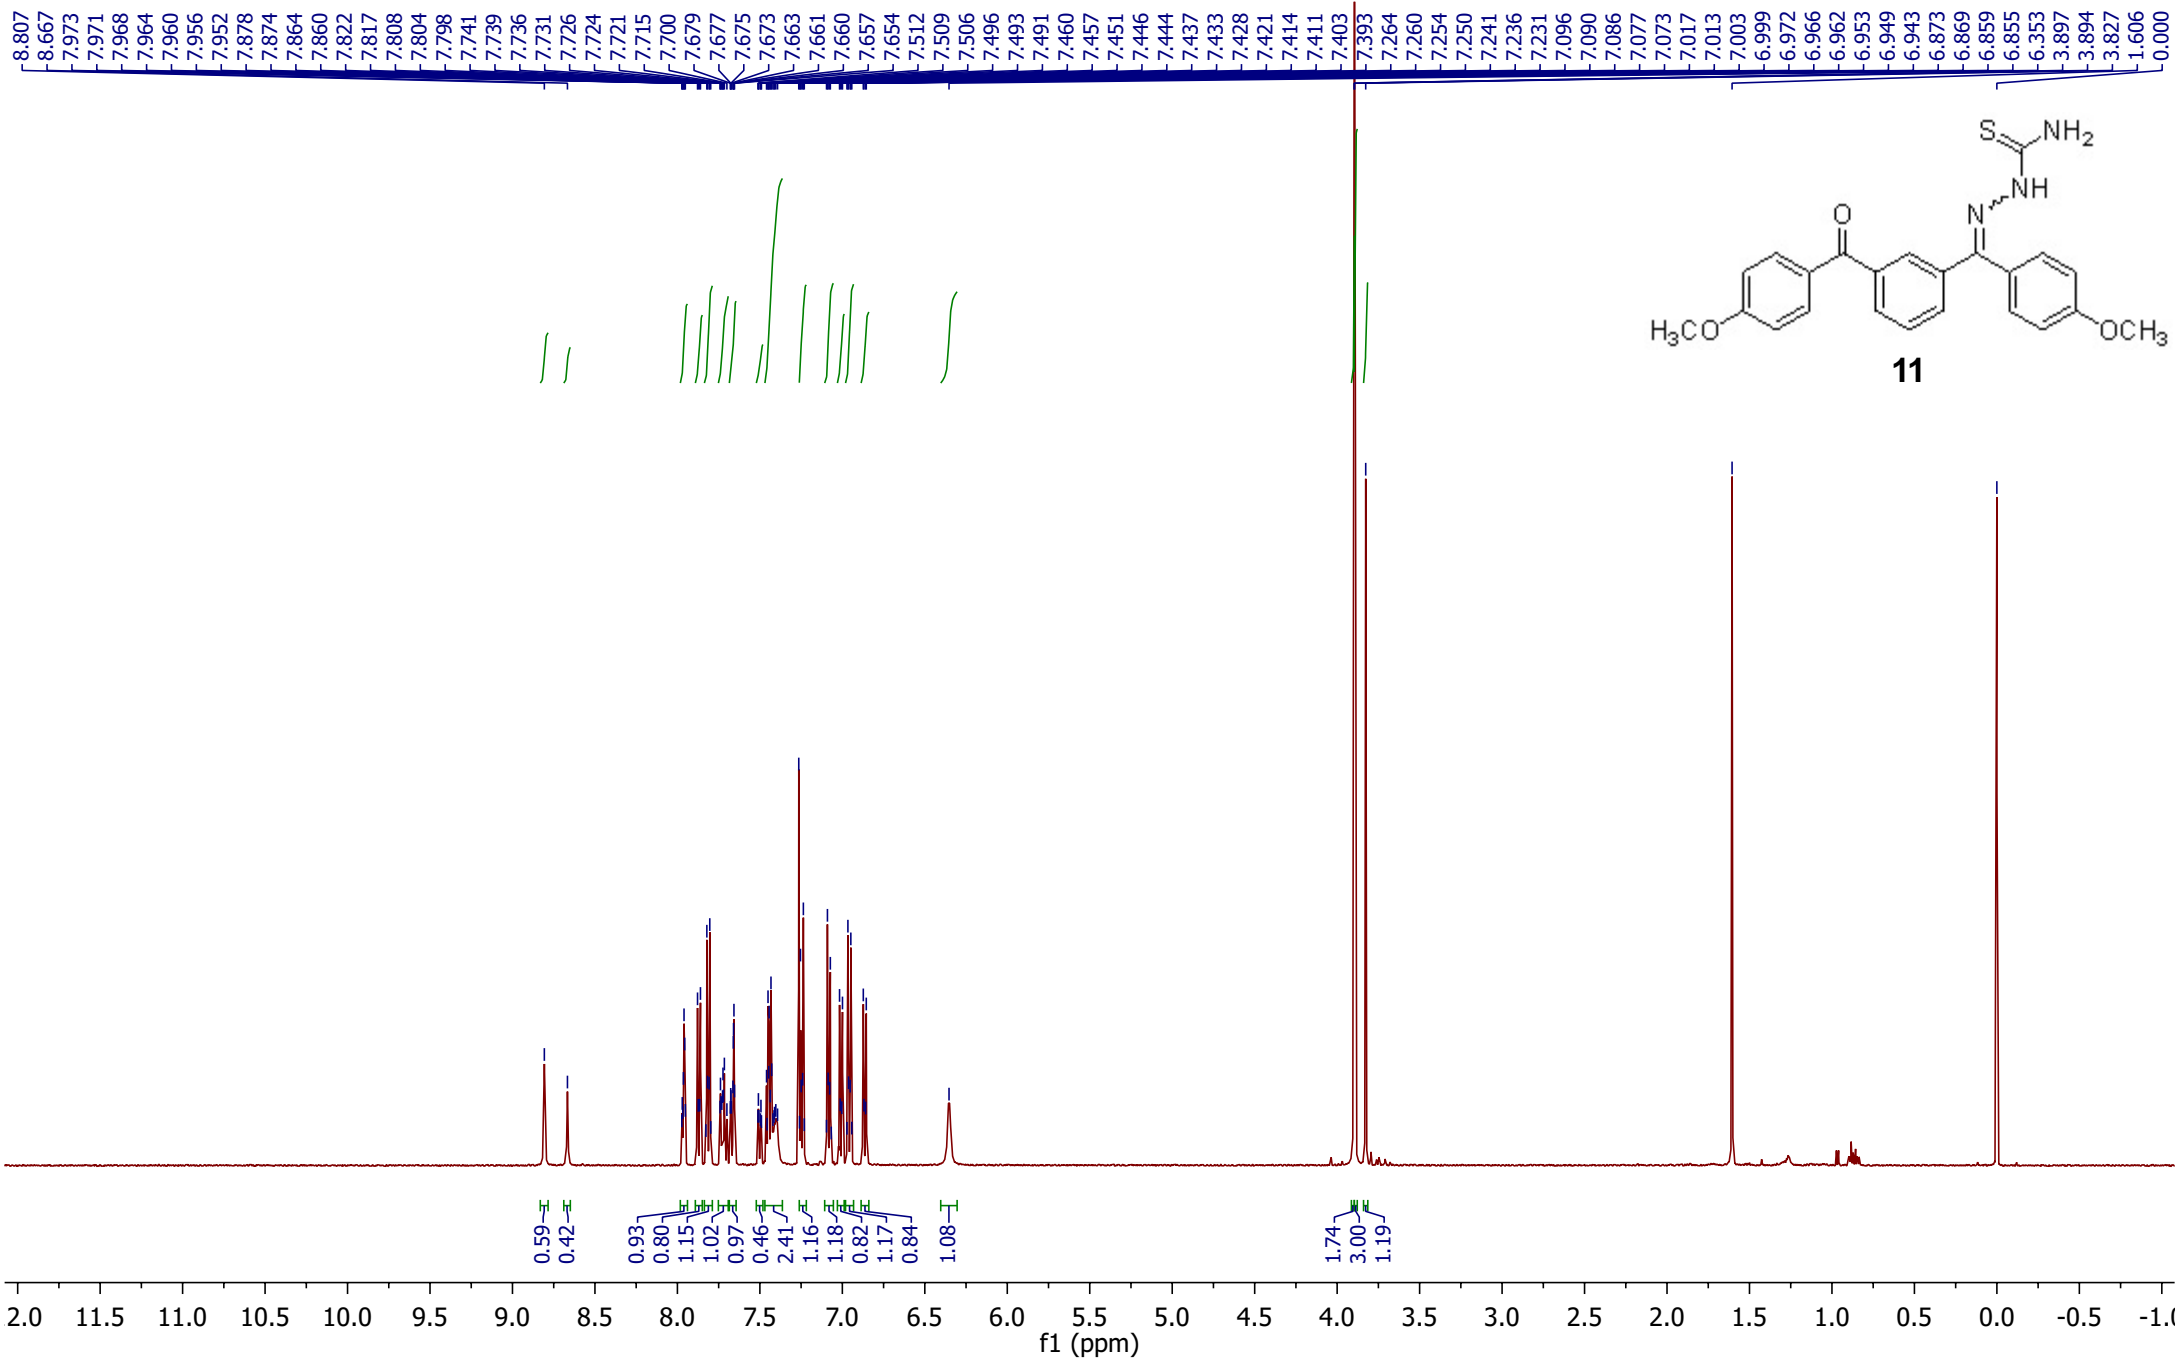

<sup>13</sup>C NMR (125 MHz, CDCl<sub>3</sub>) of Compound **11**

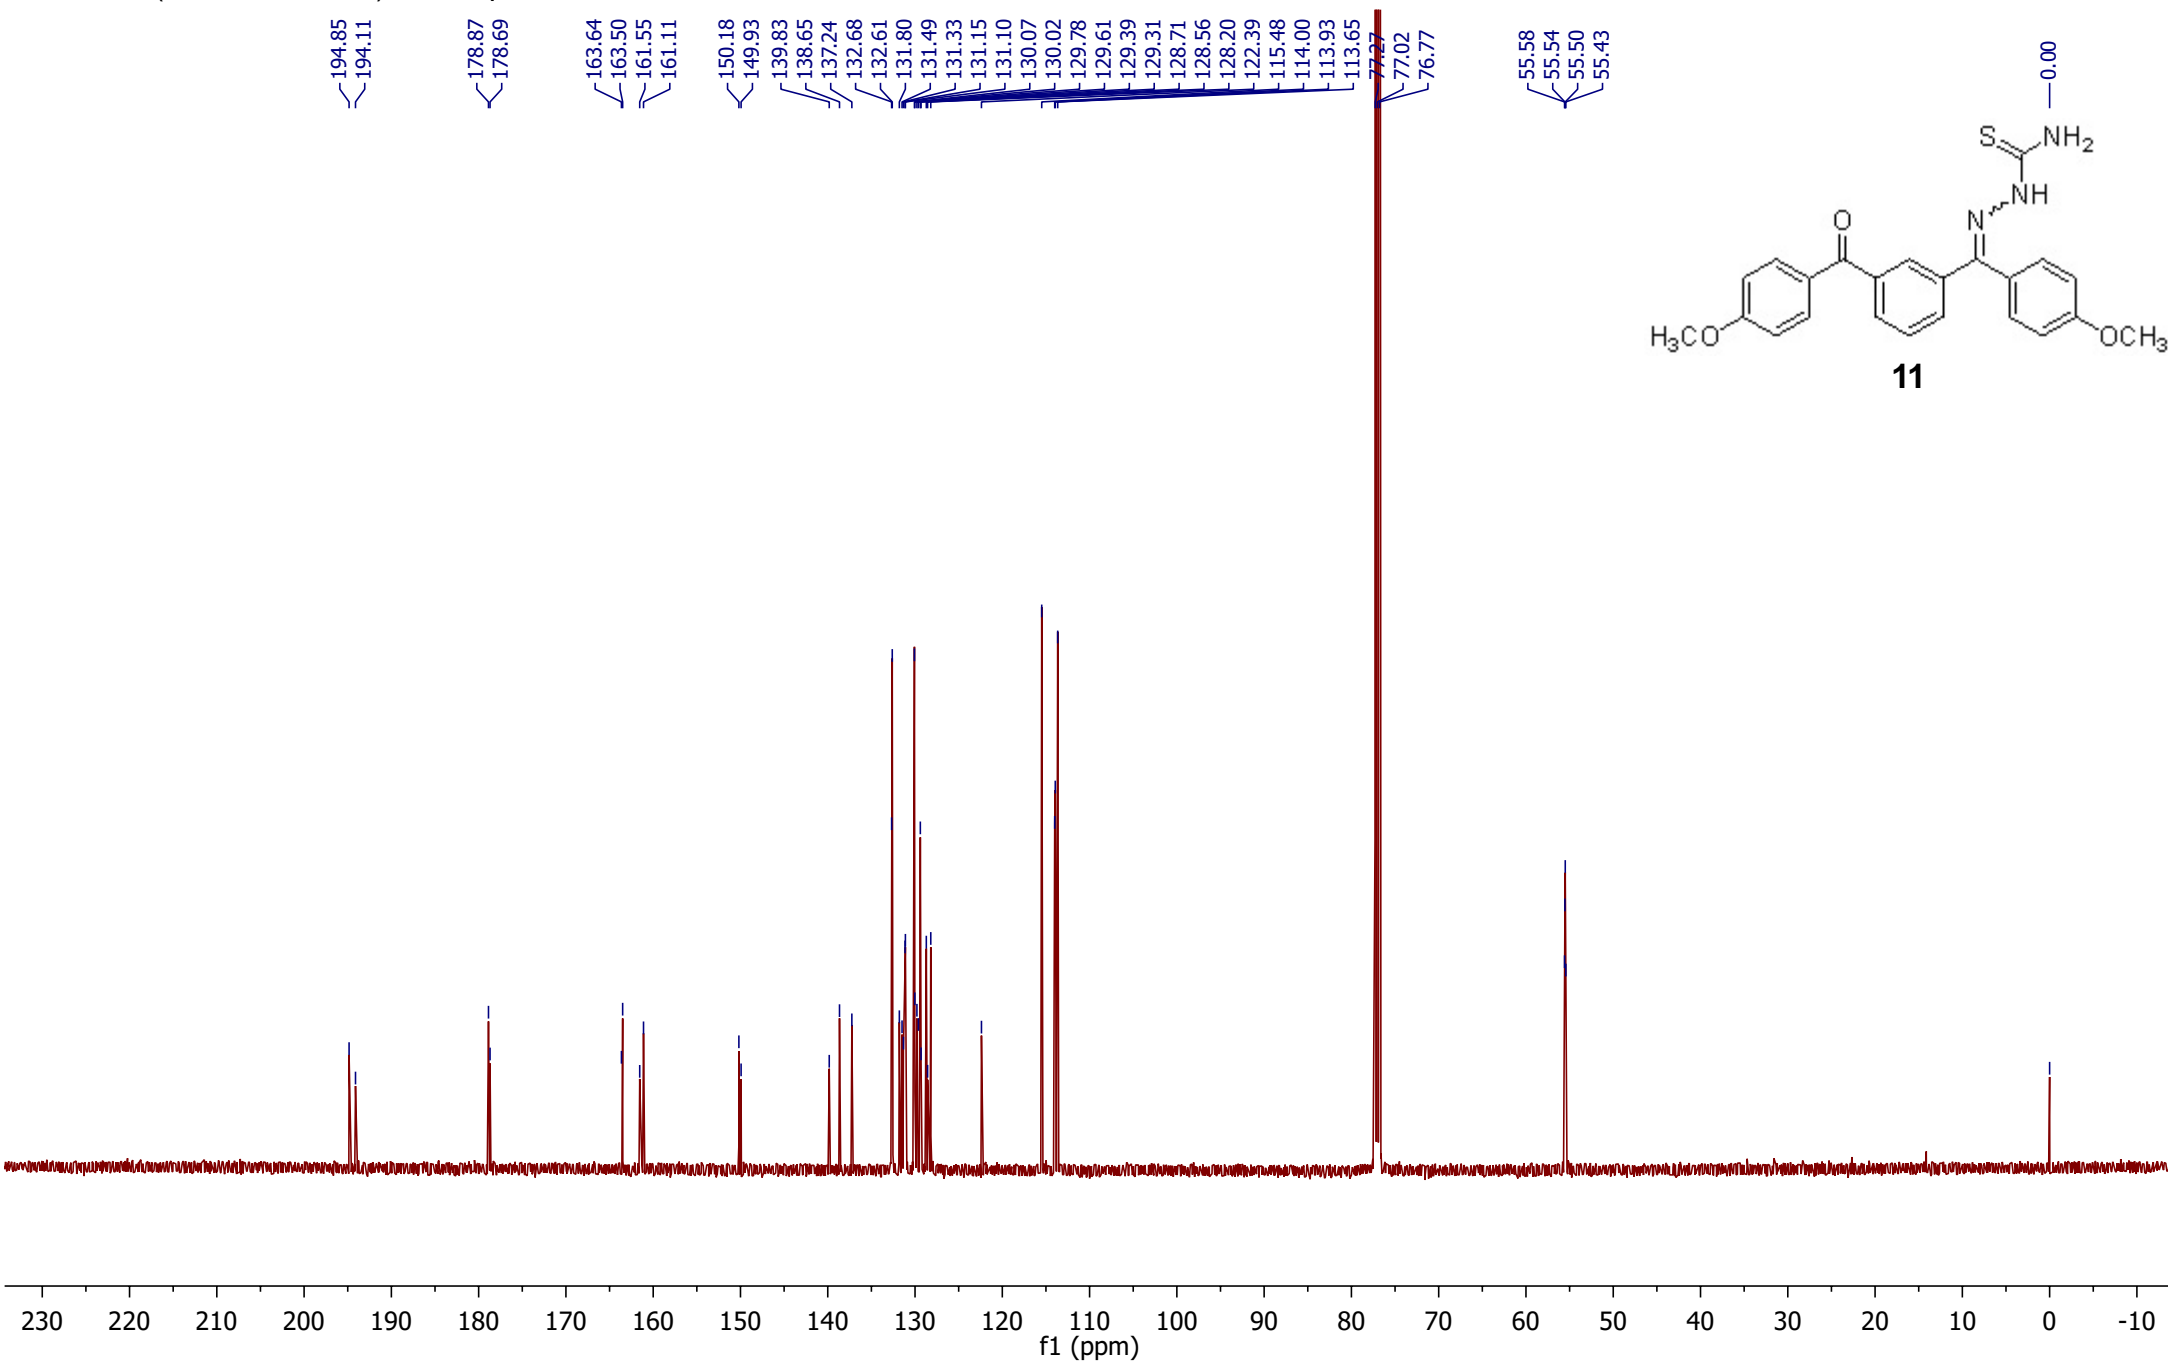

Sample Name: ENPV89

## HPLC trace for Compound 11

```
=====
Acq. Operator   : ERICAP
Acq. Instrument : Instrument 1                Location : -
Injection Date  : 8/12/2014 11:35:22 PM
Acq. Method     : C:\CHEM32\1\METHODS\GRAD 2 50-90 ACN.M
Last changed    : 8/12/2014 11:15:45 PM by ERICAP
Analysis Method : C:\CHEM32\1\DATA\ERICAP\ENPV89000001.D\DA.M (GRAD 2 50-90 ACN.M)
Last changed    : 12/22/2014 11:54:51 PM by ERICAP
                  (modified after loading)
Sample Info     : ENP-V-89
```

## Method:

0-25 min. gradient 50:50 to 10:90 Water:ACN

25-30 min 10:90 Water:ACN

Two peaks observed in the HPLC traces are due to the presence of both E and Z geometrical isomers.

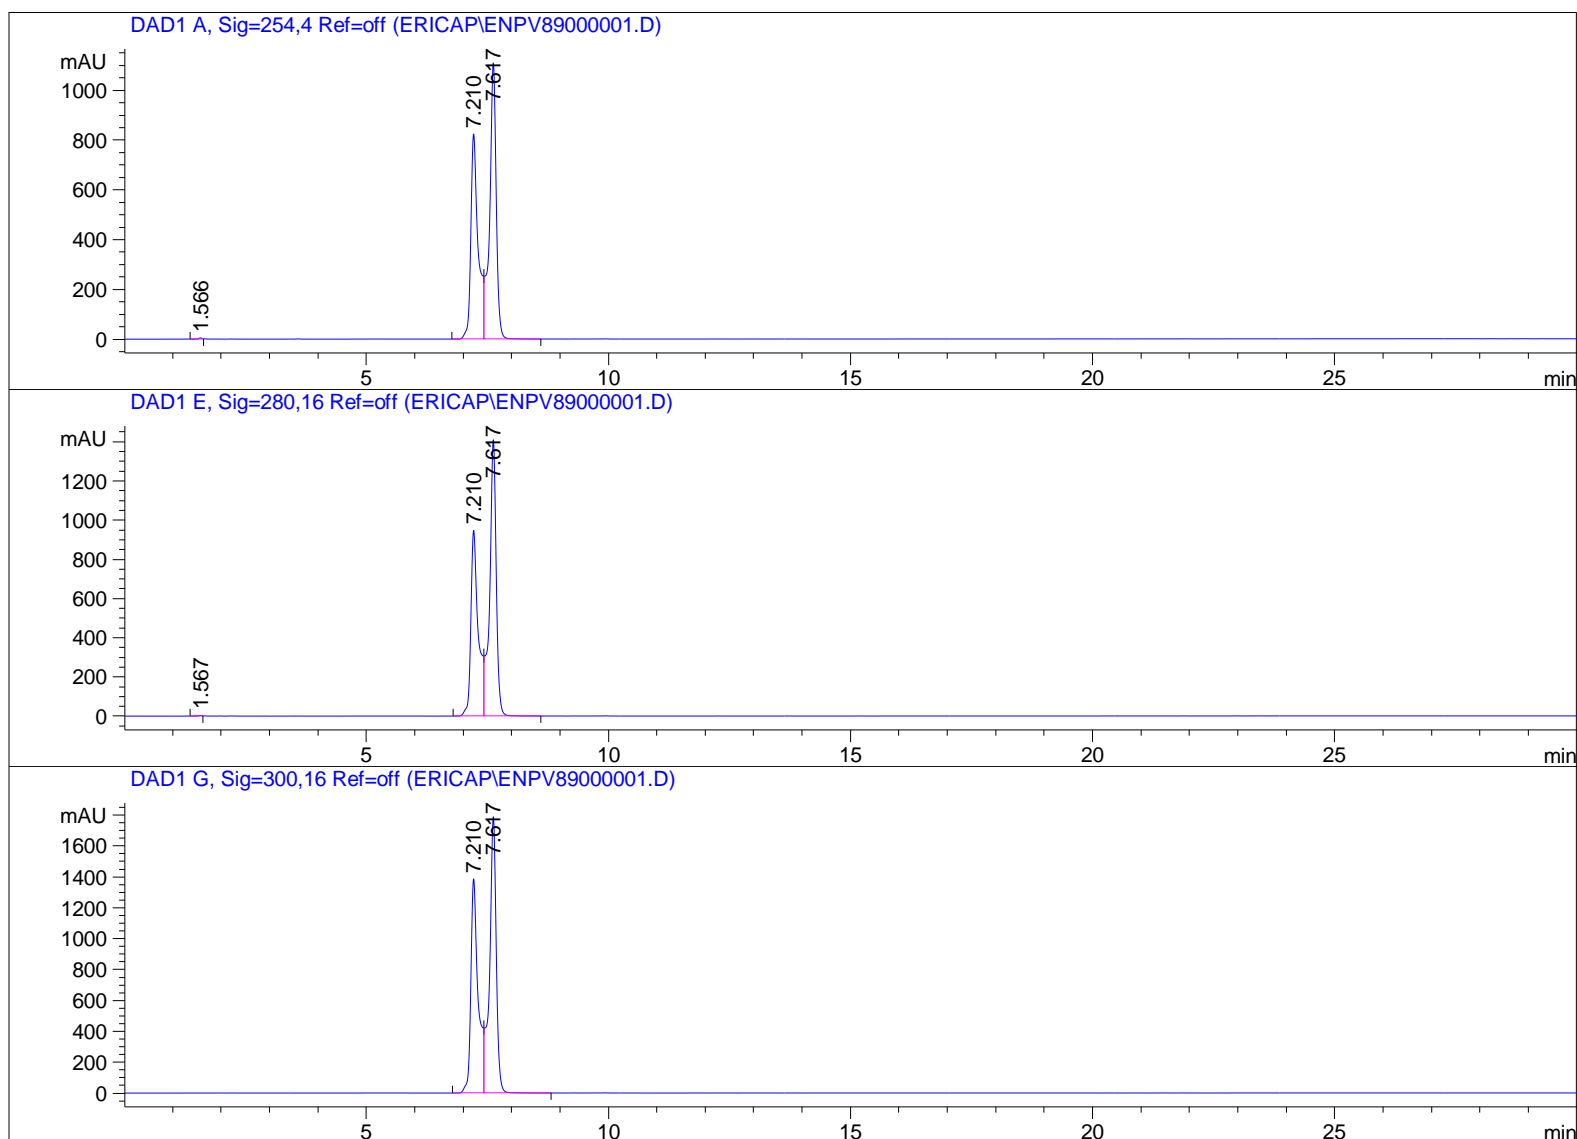



HPLC trace for Compound 11

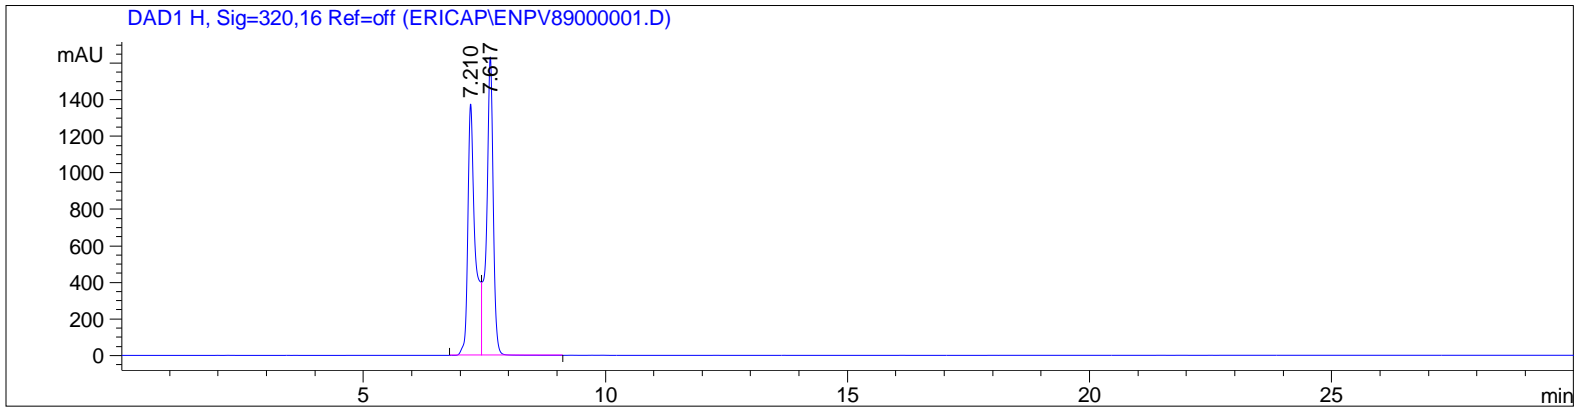

=====  
 Area Percent Report  
 =====

Sorted By : Signal  
 Multiplier : 1.0000  
 Dilution : 1.0000  
 Use Multiplier & Dilution Factor with ISTDs

Signal 1: DAD1 A, Sig=254,4 Ref=off

| Peak # | RetTime [min] | Type | Width [min] | Area [mAU*s] | Height [mAU] | Area %  |
|--------|---------------|------|-------------|--------------|--------------|---------|
| 1      | 1.566         | BV   | 0.0609      | 20.04630     | 4.98794      | 0.1041  |
| 2      | 7.210         | BV   | 0.1493      | 8726.91504   | 825.43494    | 45.3176 |
| 3      | 7.617         | VB   | 0.1383      | 1.05103e4    | 1111.56714   | 54.5783 |

Totals : 1.92572e4 1941.99002

Signal 2: DAD1 E, Sig=280,16 Ref=off

| Peak # | RetTime [min] | Type | Width [min] | Area [mAU*s] | Height [mAU] | Area %  |
|--------|---------------|------|-------------|--------------|--------------|---------|
| 1      | 1.567         | BV   | 0.0616      | 12.16926     | 2.98251      | 0.0520  |
| 2      | 7.210         | BV   | 0.1515      | 1.00376e4    | 948.42145    | 42.8540 |
| 3      | 7.617         | VB   | 0.1386      | 1.33730e4    | 1411.17322   | 57.0941 |

Totals : 2.34227e4 2362.57718

Sample Name: ENPV89

## HPLC trace for Compound 11

Signal 3: DAD1 G, Sig=300,16 Ref=off

| Peak # | RetTime [min] | Type | Width [min] | Area [mAU*s] | Height [mAU] | Area %  |
|--------|---------------|------|-------------|--------------|--------------|---------|
| 1      | 7.210         | BV   | 0.1515      | 1.46958e4    | 1388.21680   | 46.2547 |
| 2      | 7.617         | VB   | 0.1392      | 1.70757e4    | 1790.73413   | 53.7453 |

Totals : 3.17715e4 3178.95093

Signal 4: DAD1 H, Sig=320,16 Ref=off

| Peak # | RetTime [min] | Type | Width [min] | Area [mAU*s] | Height [mAU] | Area %  |
|--------|---------------|------|-------------|--------------|--------------|---------|
| 1      | 7.210         | BV   | 0.1534      | 1.45694e4    | 1377.45435   | 48.2465 |
| 2      | 7.617         | VB   | 0.1395      | 1.56285e4    | 1635.54553   | 51.7535 |

Totals : 3.01979e4 3012.99988

=====  
\*\*\* End of Report \*\*\*

# HRMS (ESI) for Compound 11

C:\Xcalibur\..ENP\_V\_89\_Orbi\_+ESI

8/18/2014 3:17:46 PM

ENP\_V\_89\_Orbi\_+ESI #3-18 RT: 0.03-0.20 AV: 16 NL: 1.93E6  
T: FTMS + p ESI Full ms [150.00-2000.00]

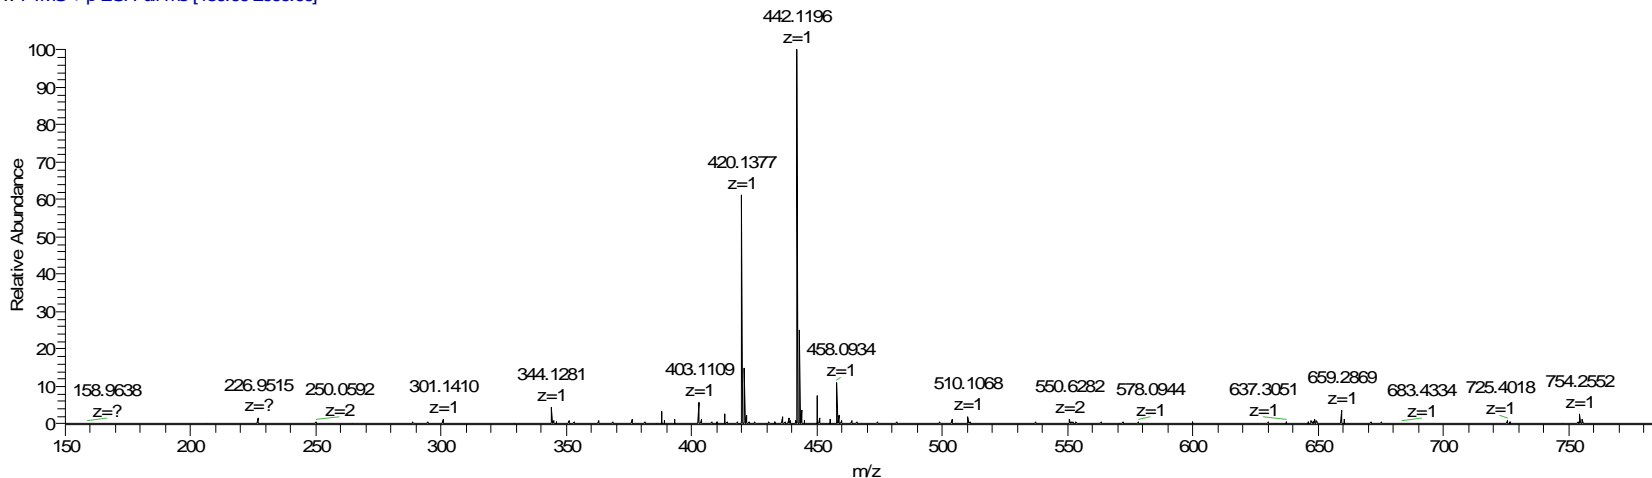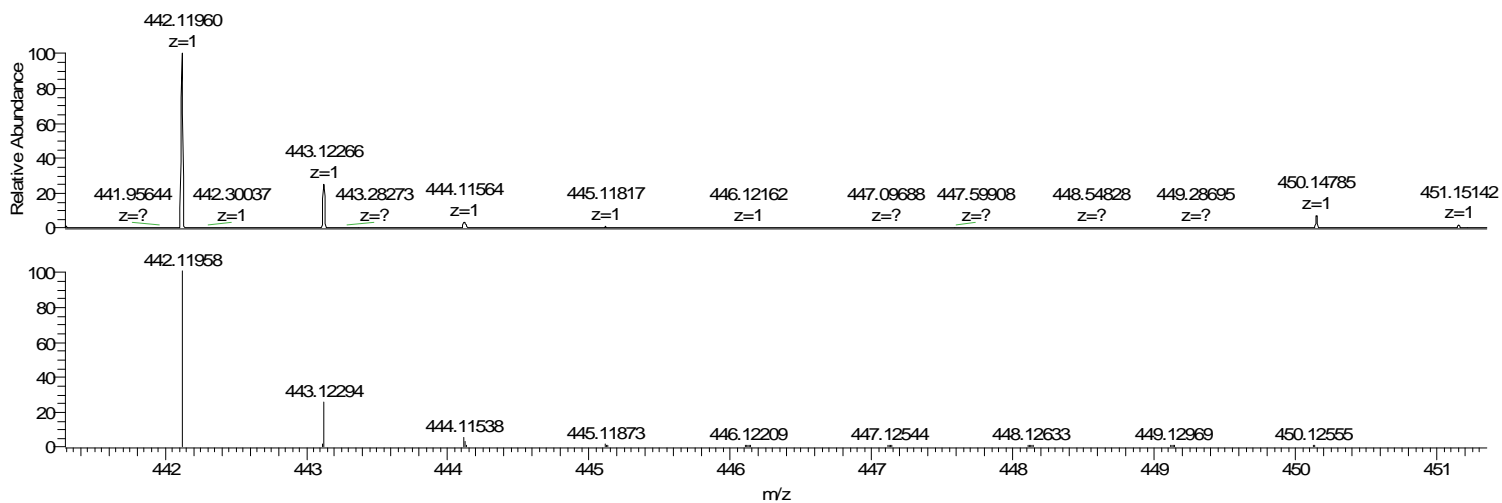

NL:  
1.93E6  
ENP\_V\_89\_Orbi\_+  
ES#3-18 RT:  
0.03-0.20 AV: 16 T:  
FTMS + p ESI Full ms  
[150.00-2000.00]

NL:  
7.26E5  
C<sub>23</sub>H<sub>21</sub>N<sub>3</sub>O<sub>3</sub>S +Na:  
C<sub>23</sub>H<sub>21</sub>N<sub>3</sub>O<sub>3</sub>S<sub>1</sub>Na<sub>1</sub>  
pa Chrg 1

<sup>1</sup>H NMR (500 MHz, Acetone-d<sub>6</sub>) of Compound **12**

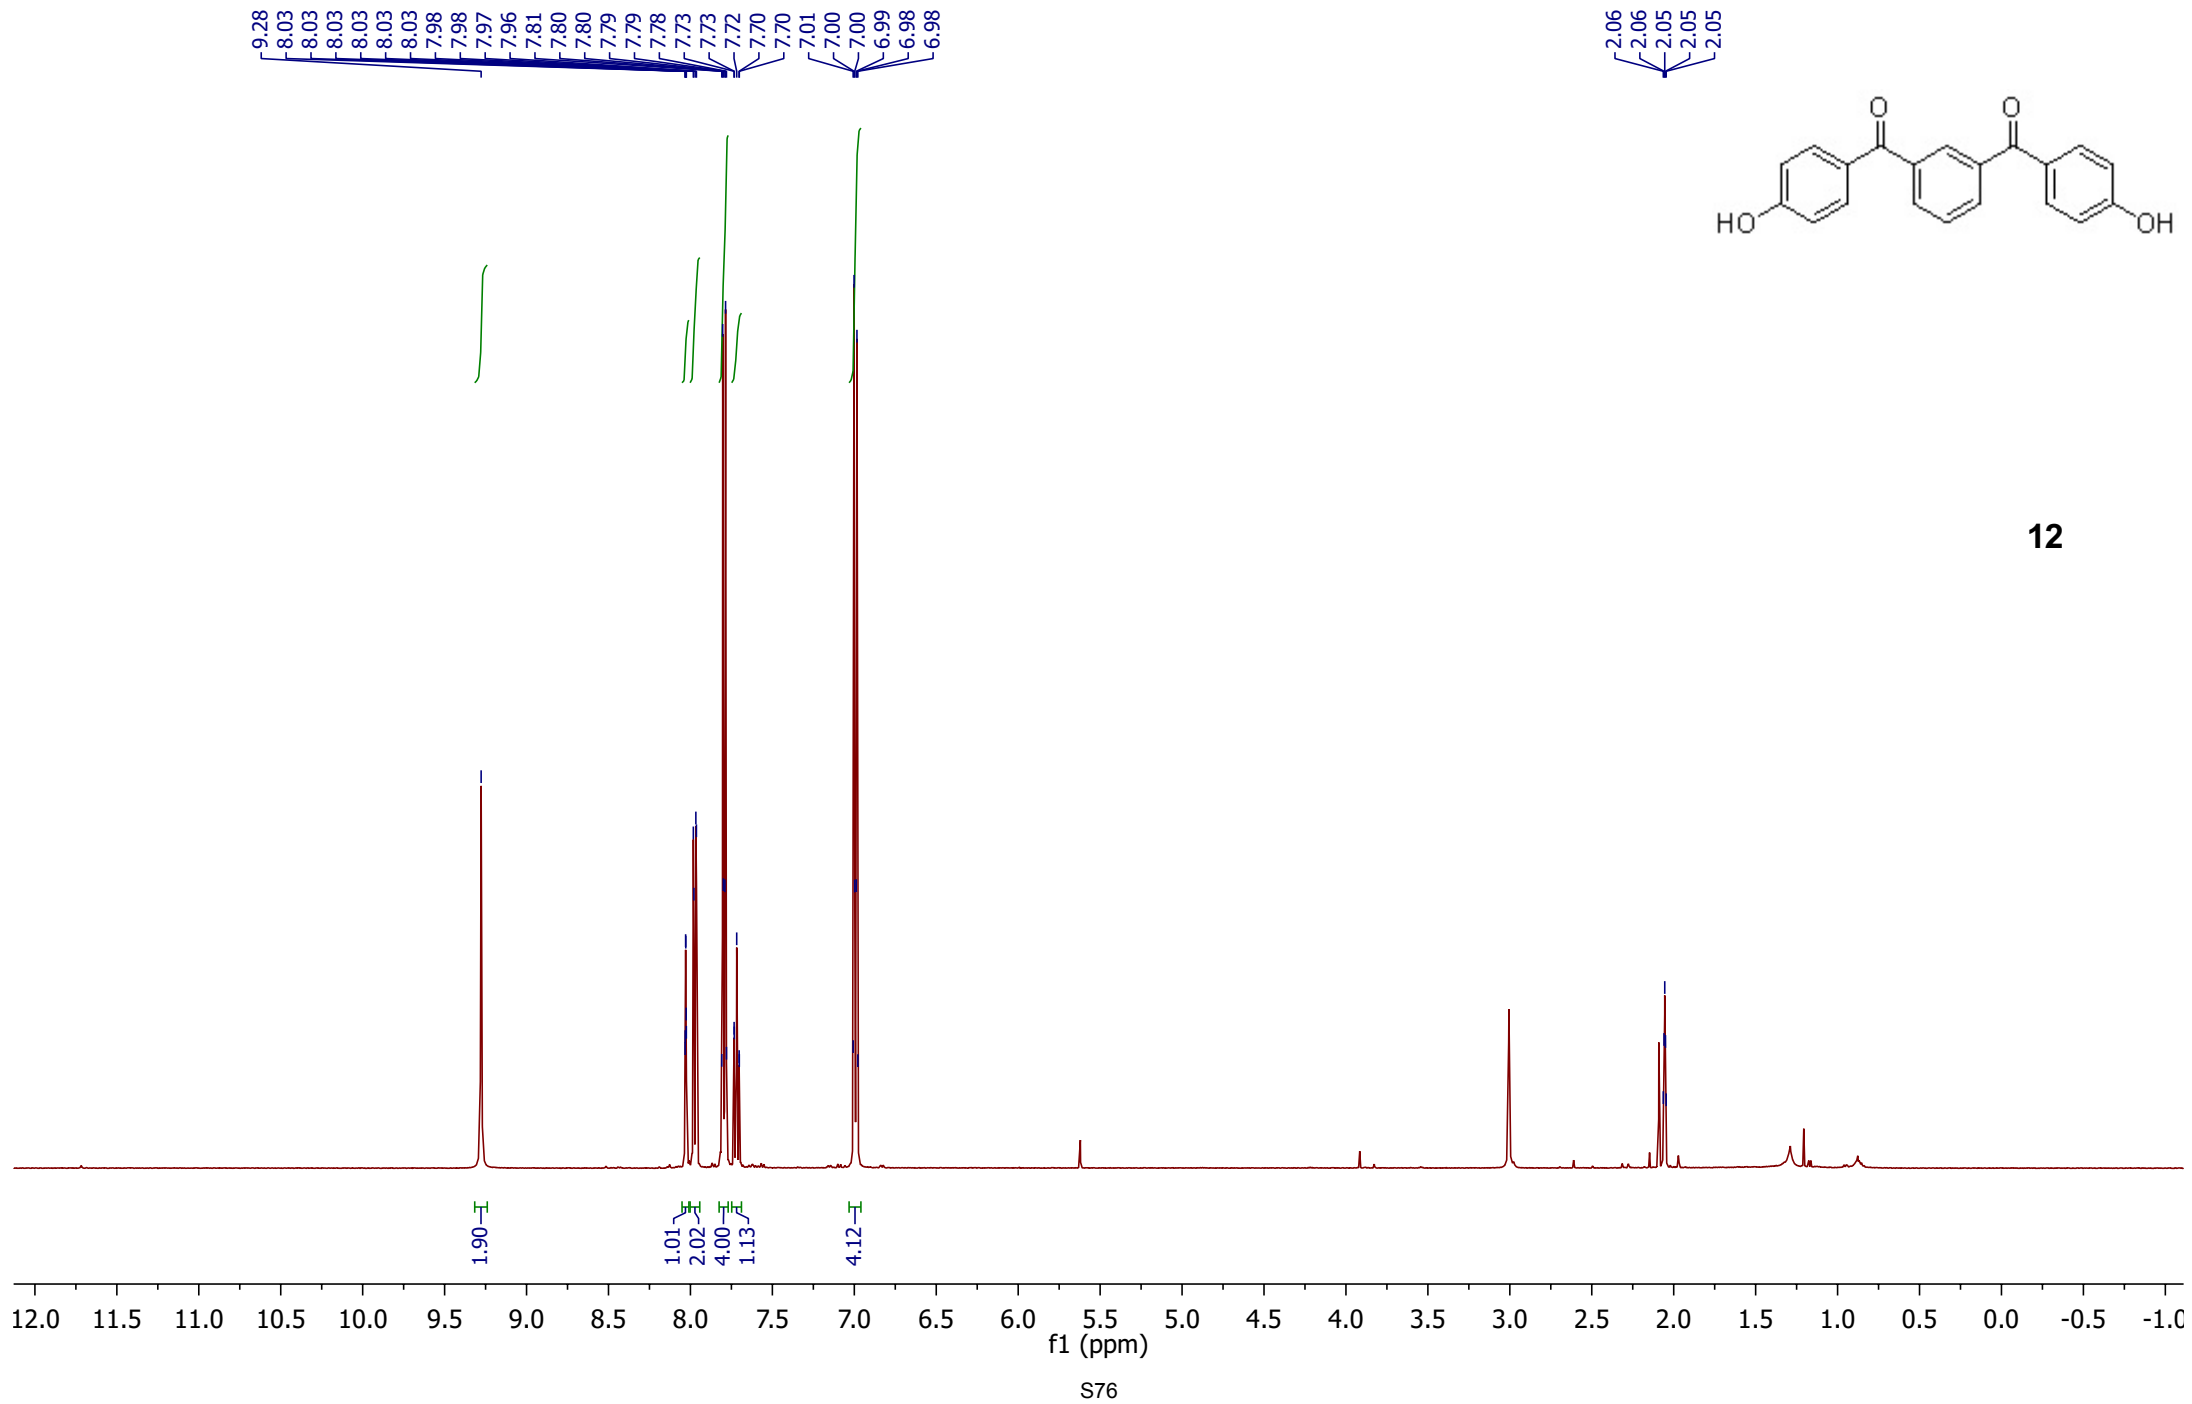

$^{13}\text{C}$  NMR (125 MHz, Acetone- $\text{d}_6$ ) of Compound **12**

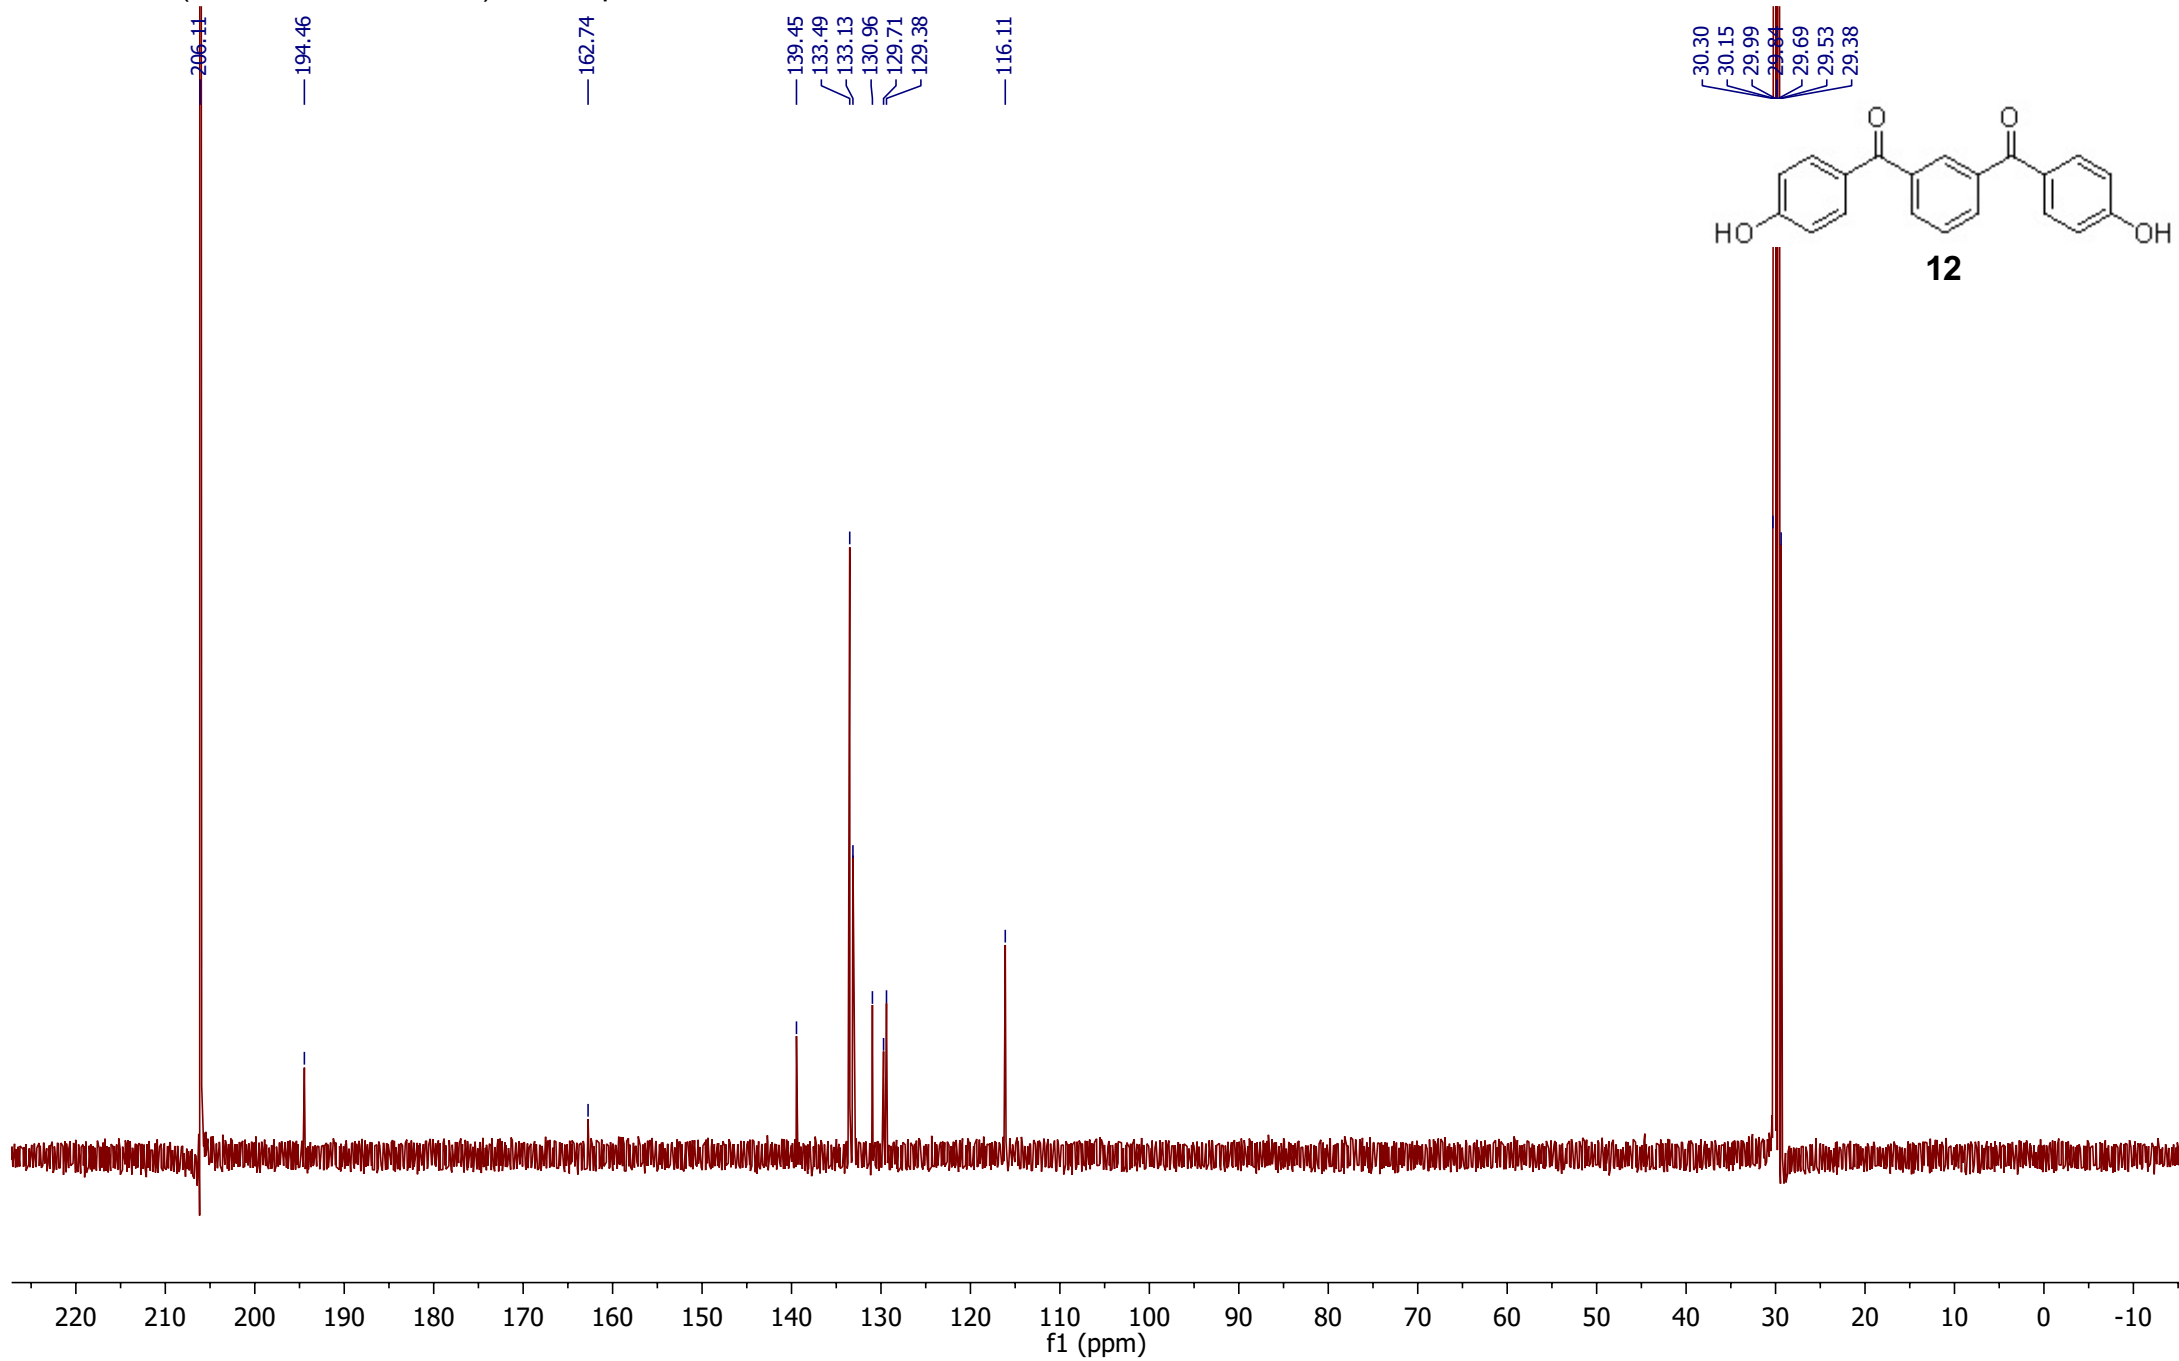

# HRMS (ESI) for Compound 12

C:\Xcalibur\..Erica\12-19-14\ENP\_V\_92

12/19/2014 9:55:22 AM

ENP\_V\_92 #138 RT: 1.74 AV: 1 NL: 4.59E7

T: FTMS + p ESI Full ms [100.00-700.00]

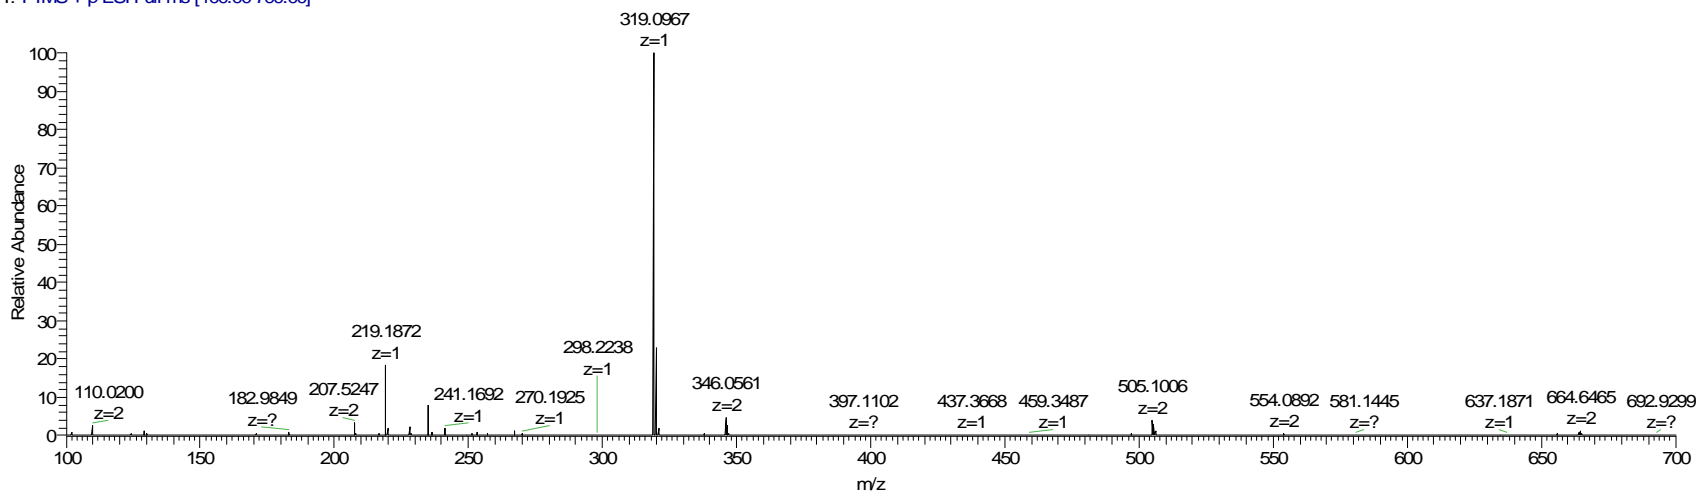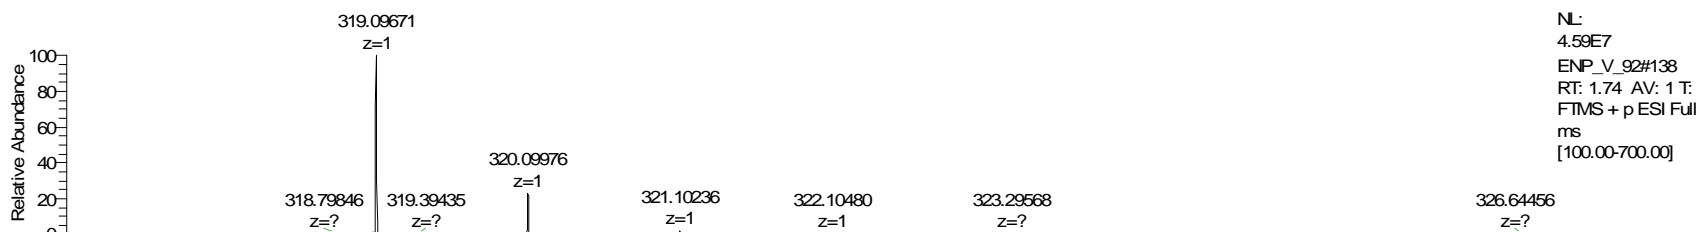

NL:  
4.59E7  
ENP\_V\_92#138  
RT: 1.74 AV: 1 T:  
FTMS + p ESI Full  
ms  
[100.00-700.00]

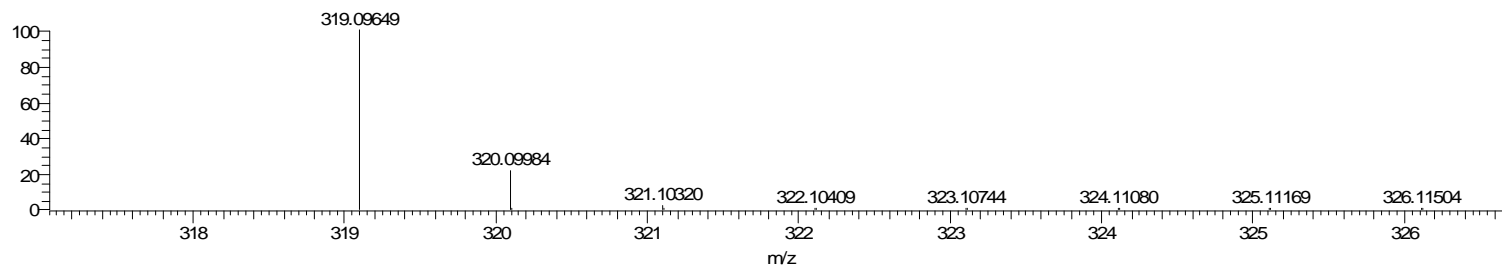

NL:  
7.97E5  
C<sub>20</sub>H<sub>4</sub>O<sub>4</sub>+H<sup>+</sup>  
C<sub>20</sub>H<sub>5</sub>O<sub>4</sub>  
pa.Chrg 1

<sup>1</sup>H NMR (600 MHz, DMSO-d<sub>6</sub>) of Compound **13**

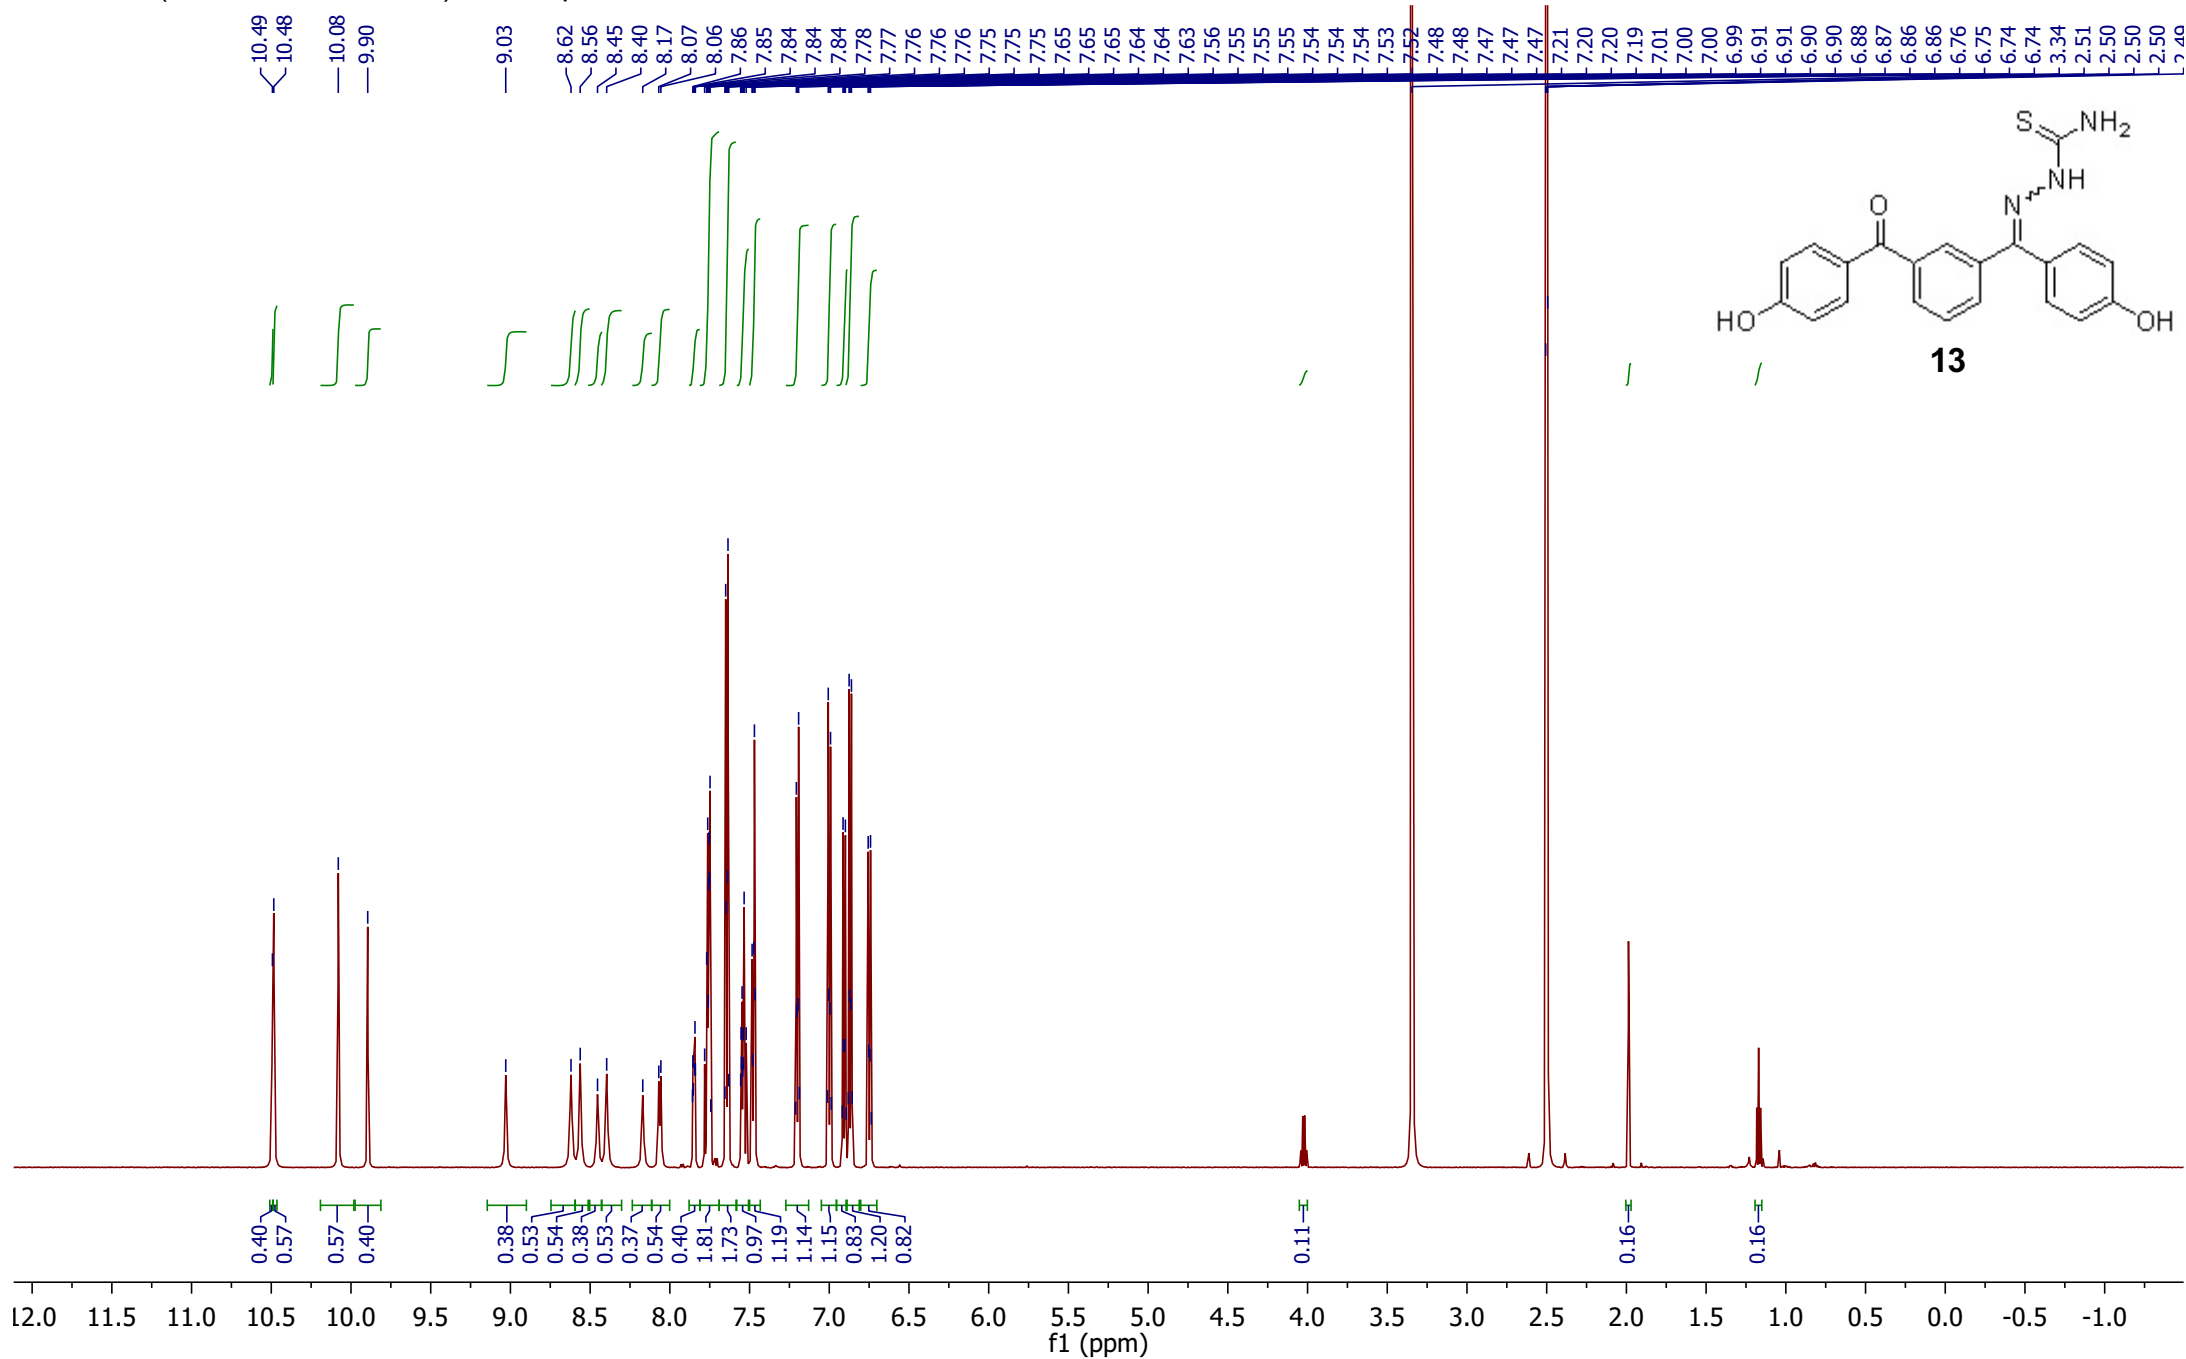

<sup>13</sup>C NMR (150 MHz, DMSO-d<sub>6</sub>) of Compound **13**

193.87  
193.65

177.88  
177.72

162.23  
162.19  
159.27  
158.78

148.80  
148.71  
139.04

138.27  
137.11

132.83  
132.66

131.96  
130.50

130.22  
130.10  
130.03

129.84  
129.50  
129.33

128.40  
128.27  
127.60

127.59  
127.31

120.89  
116.57  
115.39

115.31  
115.23

39.95  
39.80  
39.66  
39.52  
39.38  
39.24  
39.10

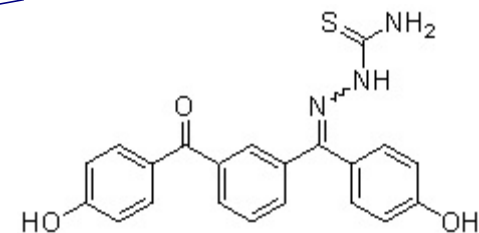

**13**

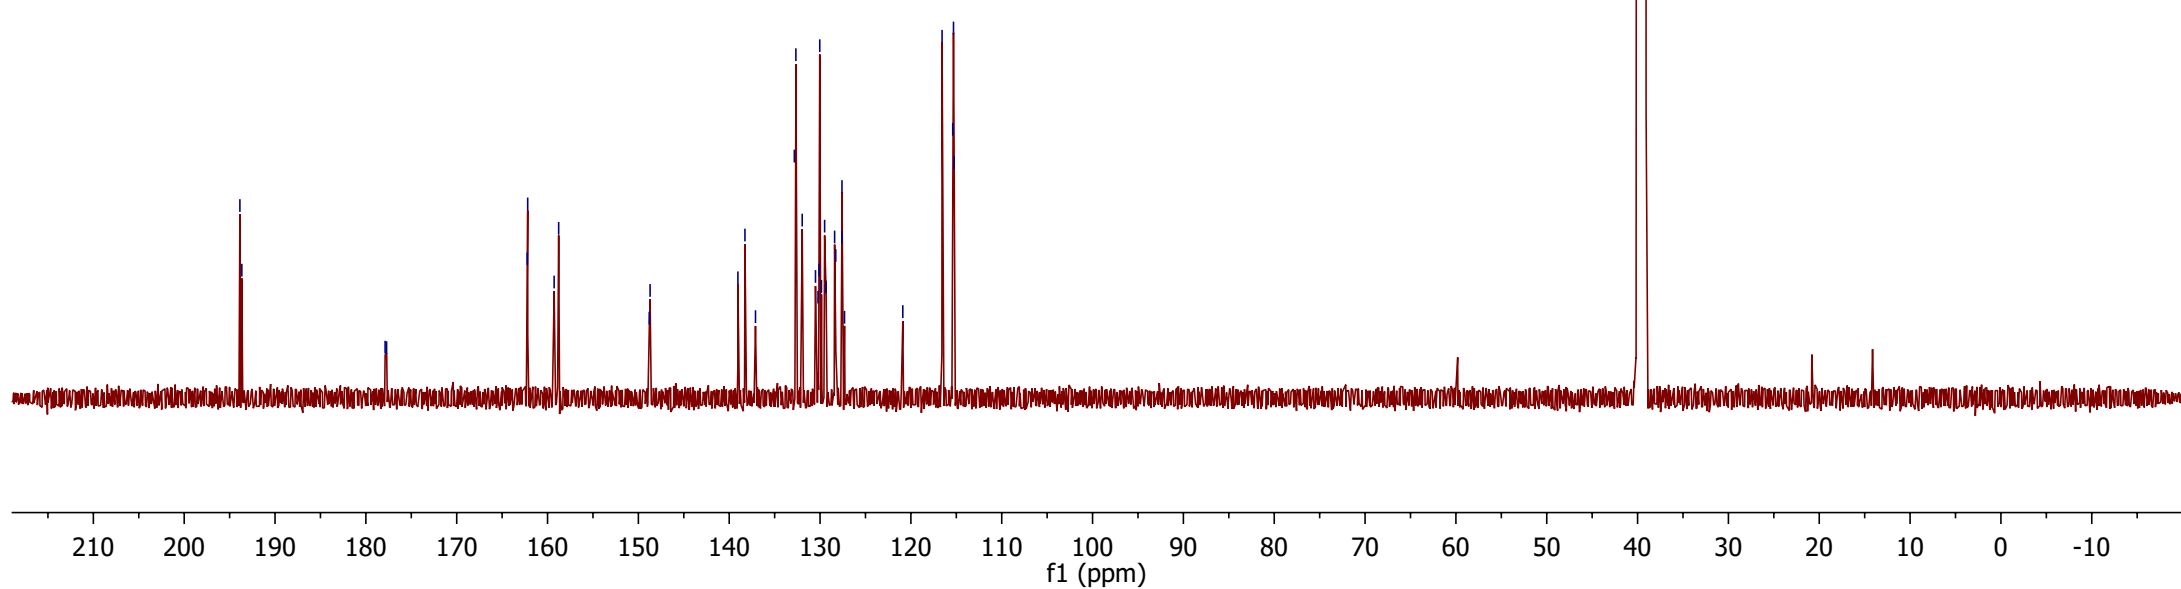



## HPLC trace for Compound 13

=====

Acq. Operator : ERICA P  
Acq. Instrument : Instrument 1 Location : -  
Injection Date : 12/4/2014 4:20:38 PM  
Acq. Method : C:\CHEM32\1\METHODS\GRAD 2 30-90 ACN.M  
Last changed : 12/4/2014 3:31:16 PM by ERICA P  
Analysis Method : C:\CHEM32\1\DATA\ERICA P\ENPV94NOLYO0002.D\DA.M (GRAD 2 30-90 ACN.M)  
Last changed : 12/23/2014 12:09:10 AM by ERICAP  
(modified after loading)  
Sample Info : ENPV94 nolyo

## Method:

0-25 min gradient ACN:Water 30:70 to 90:10

25-30 min ACN:Water 90:10

Two peaks observed in the HPLC traces are due to the presence of both E and Z geometrical isomers.

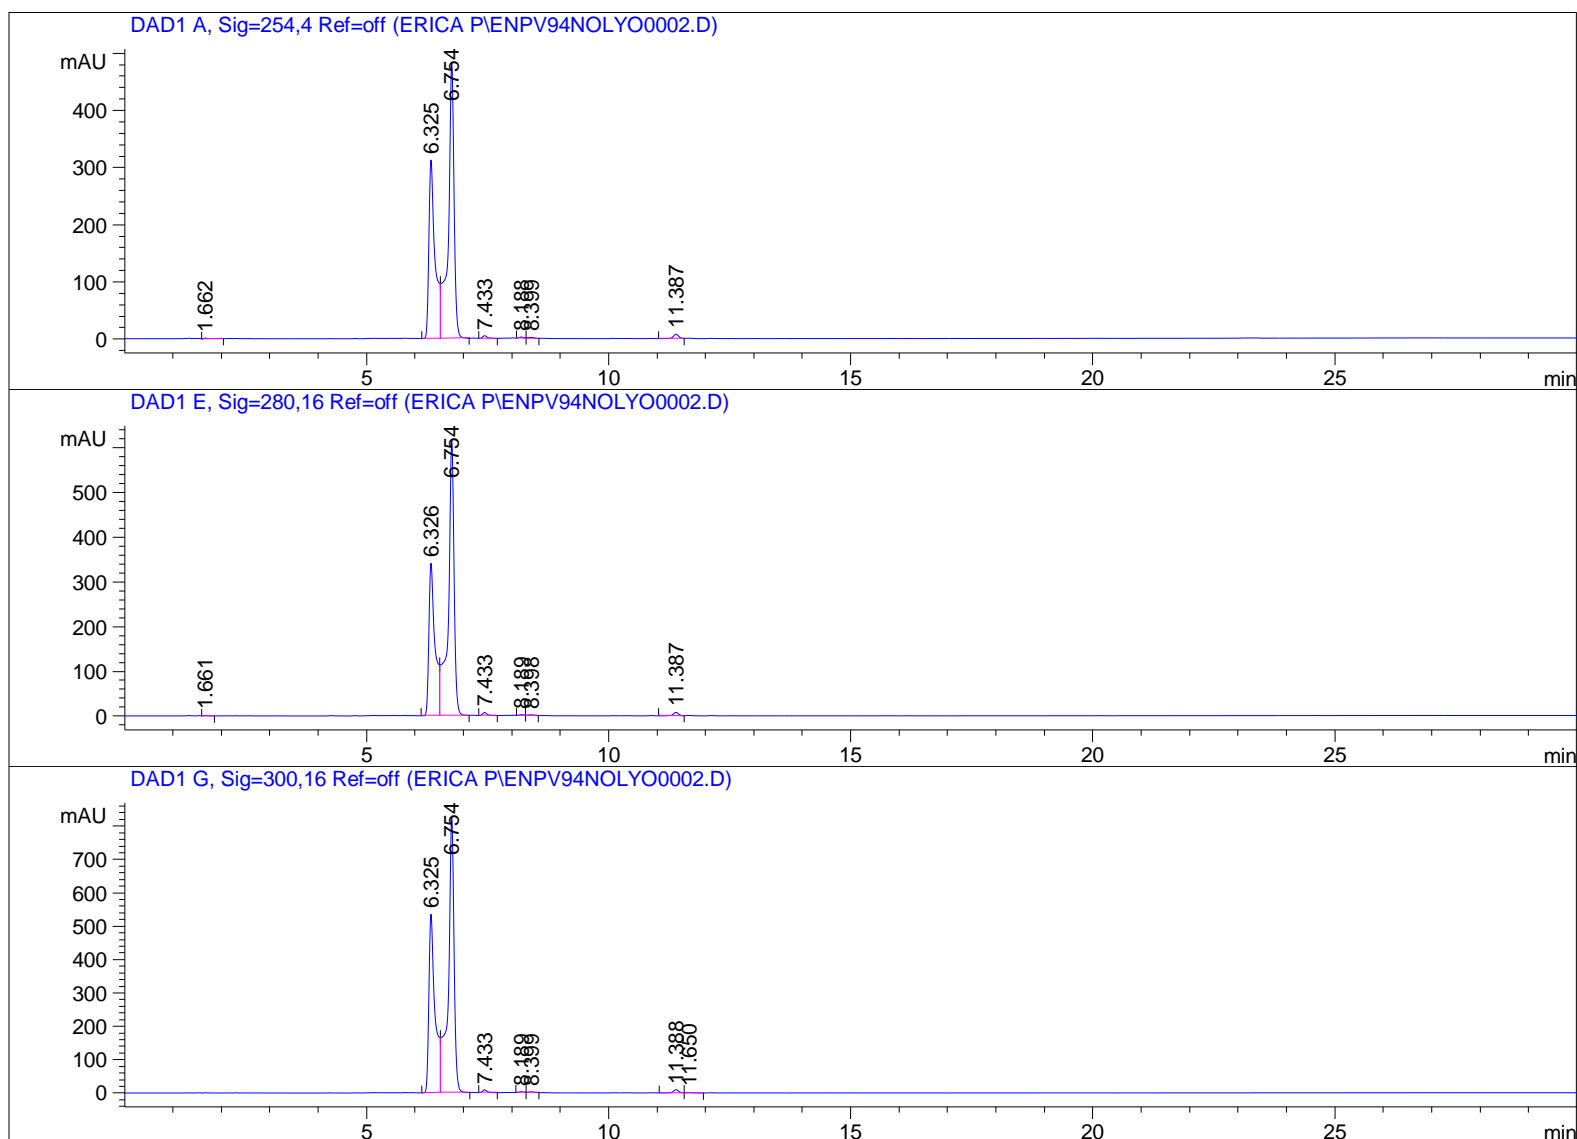

## HPLC trace for Compound 13

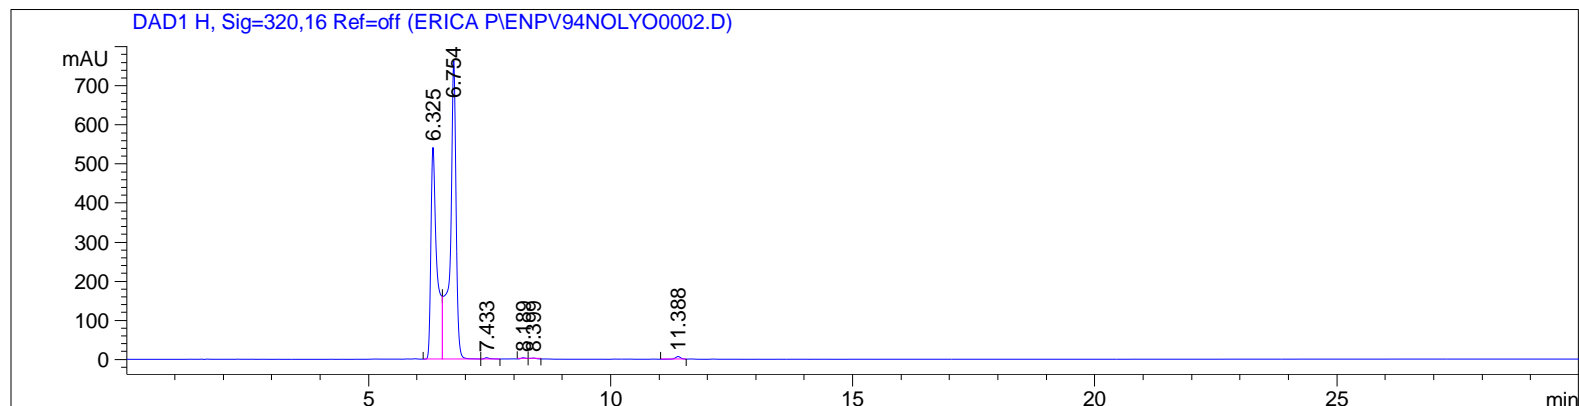

```
=====
                          Area Percent Report
=====
```

```
Sorted By           :      Signal
Multiplier          :      1.0000
Dilution            :      1.0000
Use Multiplier & Dilution Factor with ISTDs
```

Signal 1: DAD1 A, Sig=254,4 Ref=off

| Peak # | RetTime [min] | Type | Width [min] | Area [mAU*s] | Height [mAU] | Area %  |
|--------|---------------|------|-------------|--------------|--------------|---------|
| 1      | 1.662         | BB   | 0.1258      | 15.86365     | 1.71752      | 0.2278  |
| 2      | 6.325         | BV   | 0.1255      | 2772.37378   | 312.63953    | 39.8080 |
| 3      | 6.754         | VB   | 0.1202      | 4058.80469   | 482.32565    | 58.2796 |
| 4      | 7.433         | BB   | 0.0965      | 29.68061     | 4.64805      | 0.4262  |
| 5      | 8.188         | BV   | 0.0975      | 13.42526     | 2.07389      | 0.1928  |
| 6      | 8.399         | VB   | 0.1220      | 13.41390     | 1.63097      | 0.1926  |
| 7      | 11.387        | BV   | 0.1181      | 60.80157     | 7.69954      | 0.8730  |

```
Totals :                      6964.36345  812.73515
```

Signal 2: DAD1 E, Sig=280,16 Ref=off

| Peak # | RetTime [min] | Type | Width [min] | Area [mAU*s] | Height [mAU] | Area %  |
|--------|---------------|------|-------------|--------------|--------------|---------|
| 1      | 1.661         | BB   | 0.0896      | 6.79549      | 1.10736      | 0.0814  |
| 2      | 6.326         | BV   | 0.1251      | 3019.75562   | 341.58194    | 36.1853 |
| 3      | 6.754         | VV   | 0.1201      | 5190.49023   | 617.19513    | 62.1968 |
| 4      | 7.433         | BB   | 0.0948      | 42.22719     | 6.76395      | 0.5060  |
| 5      | 8.189         | BV   | 0.0945      | 11.95339     | 1.87082      | 0.1432  |
| 6      | 8.398         | VB   | 0.1213      | 13.18598     | 1.61438      | 0.1580  |
| 7      | 11.387        | BV   | 0.1192      | 60.85531     | 7.62100      | 0.7292  |

Sample Name: ENPV94nolyo

## HPLC trace for Compound 13

Totals : 8345.26322 977.75458

Signal 3: DAD1 G, Sig=300,16 Ref=off

| Peak # | RetTime [min] | Type | Width [min] | Area [mAU*s] | Height [mAU] | Area %  |
|--------|---------------|------|-------------|--------------|--------------|---------|
| 1      | 6.325         | BV   | 0.1255      | 4755.72754   | 535.93927    | 39.9371 |
| 2      | 6.754         | VB   | 0.1203      | 6972.91406   | 827.21509    | 58.5563 |
| 3      | 7.433         | BB   | 0.0962      | 53.62053     | 8.42650      | 0.4503  |
| 4      | 8.189         | BV   | 0.1007      | 19.17342     | 2.91529      | 0.1610  |
| 5      | 8.399         | VB   | 0.1228      | 19.43227     | 2.34274      | 0.1632  |
| 6      | 11.388        | BV   | 0.1186      | 77.60942     | 9.78288      | 0.6517  |
| 7      | 11.650        | VB   | 0.1436      | 9.57091      | 1.01840      | 0.0804  |

Totals : 1.19080e4 1387.64017

Signal 4: DAD1 H, Sig=320,16 Ref=off

| Peak # | RetTime [min] | Type | Width [min] | Area [mAU*s] | Height [mAU] | Area %  |
|--------|---------------|------|-------------|--------------|--------------|---------|
| 1      | 6.325         | BV   | 0.1258      | 4831.85156   | 542.90118    | 42.3136 |
| 2      | 6.754         | VV   | 0.1209      | 6468.16846   | 763.32953    | 56.6432 |
| 3      | 7.433         | VB   | 0.1059      | 24.17973     | 3.36286      | 0.2117  |
| 4      | 8.189         | BV   | 0.1030      | 20.42628     | 3.01716      | 0.1789  |
| 5      | 8.399         | VB   | 0.1246      | 19.15187     | 2.26725      | 0.1677  |
| 6      | 11.388        | BV   | 0.1186      | 55.37372     | 6.97799      | 0.4849  |

Totals : 1.14192e4 1321.85598

```

=====
*** End of Report ***

```

# HRMS(ESI) for Compound 13

C:\Xcalibur...\ENP\_V\_94\_Orbi\_+ESI

1/13/2015 5:05:20 PM

ENP\_V\_94\_Orbi\_+ESI #1-9 RT: 0.01-0.11 AV: 9 NL: 2.69E6  
T: FTMS + p ESI Full ms [75.00-1000.00]

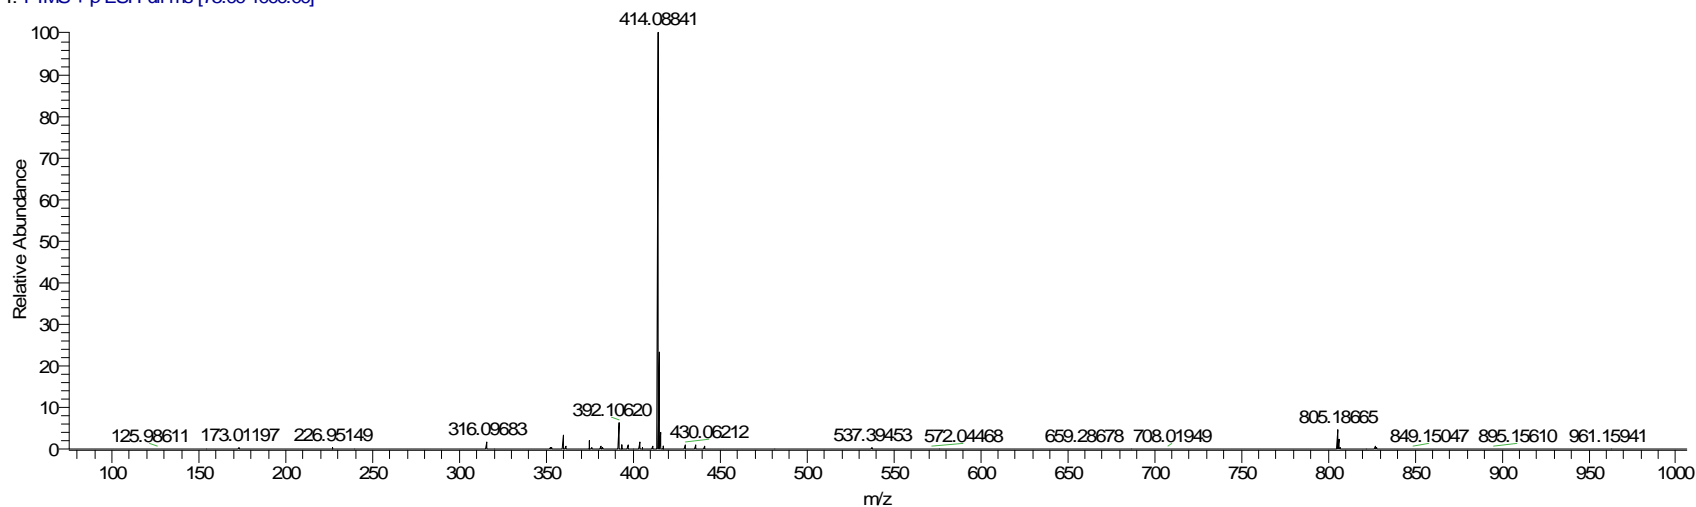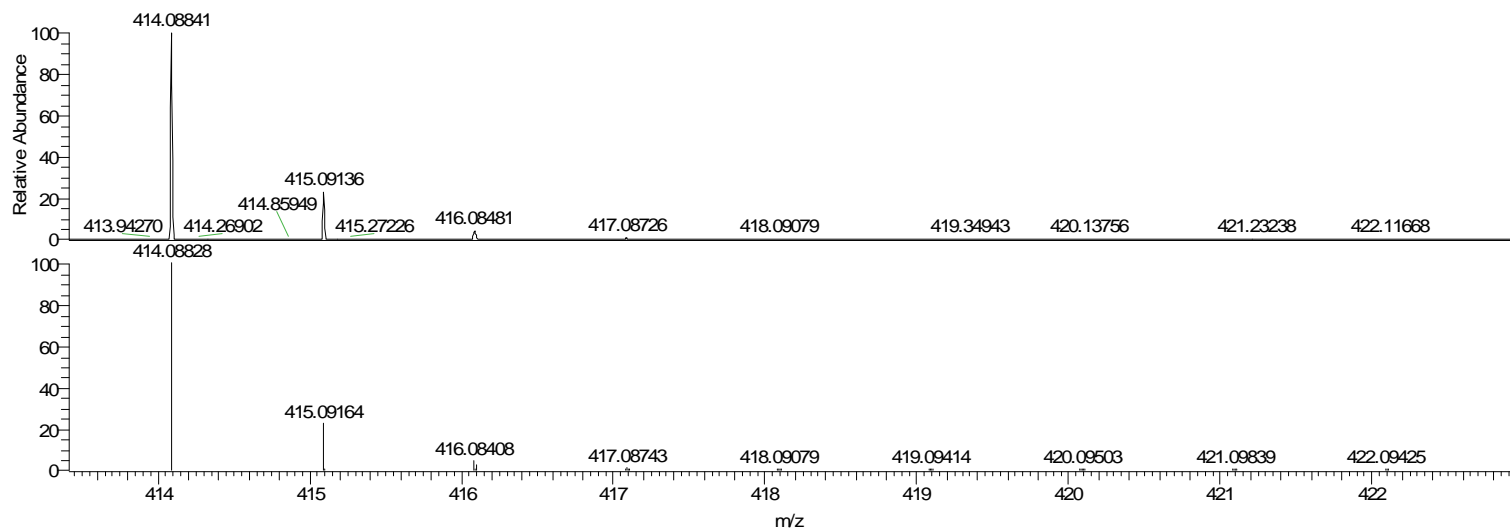

NL:  
2.69E6  
ENP\_V\_94\_Orbi\_+  
ESI#1-9 RT: 0.01-0.11  
AV: 9 T: FTMS + p  
ESI Full ms  
[75.00-1000.00]

NL:  
7.42E5  
C21H17N3O3S+Na+  
C21H17N3O3S1Na1  
pa Chrg 1

<sup>1</sup>H NMR (500 MHz, Acetone-d<sub>6</sub>) for intermediate between Compound **12** and Compound **14**

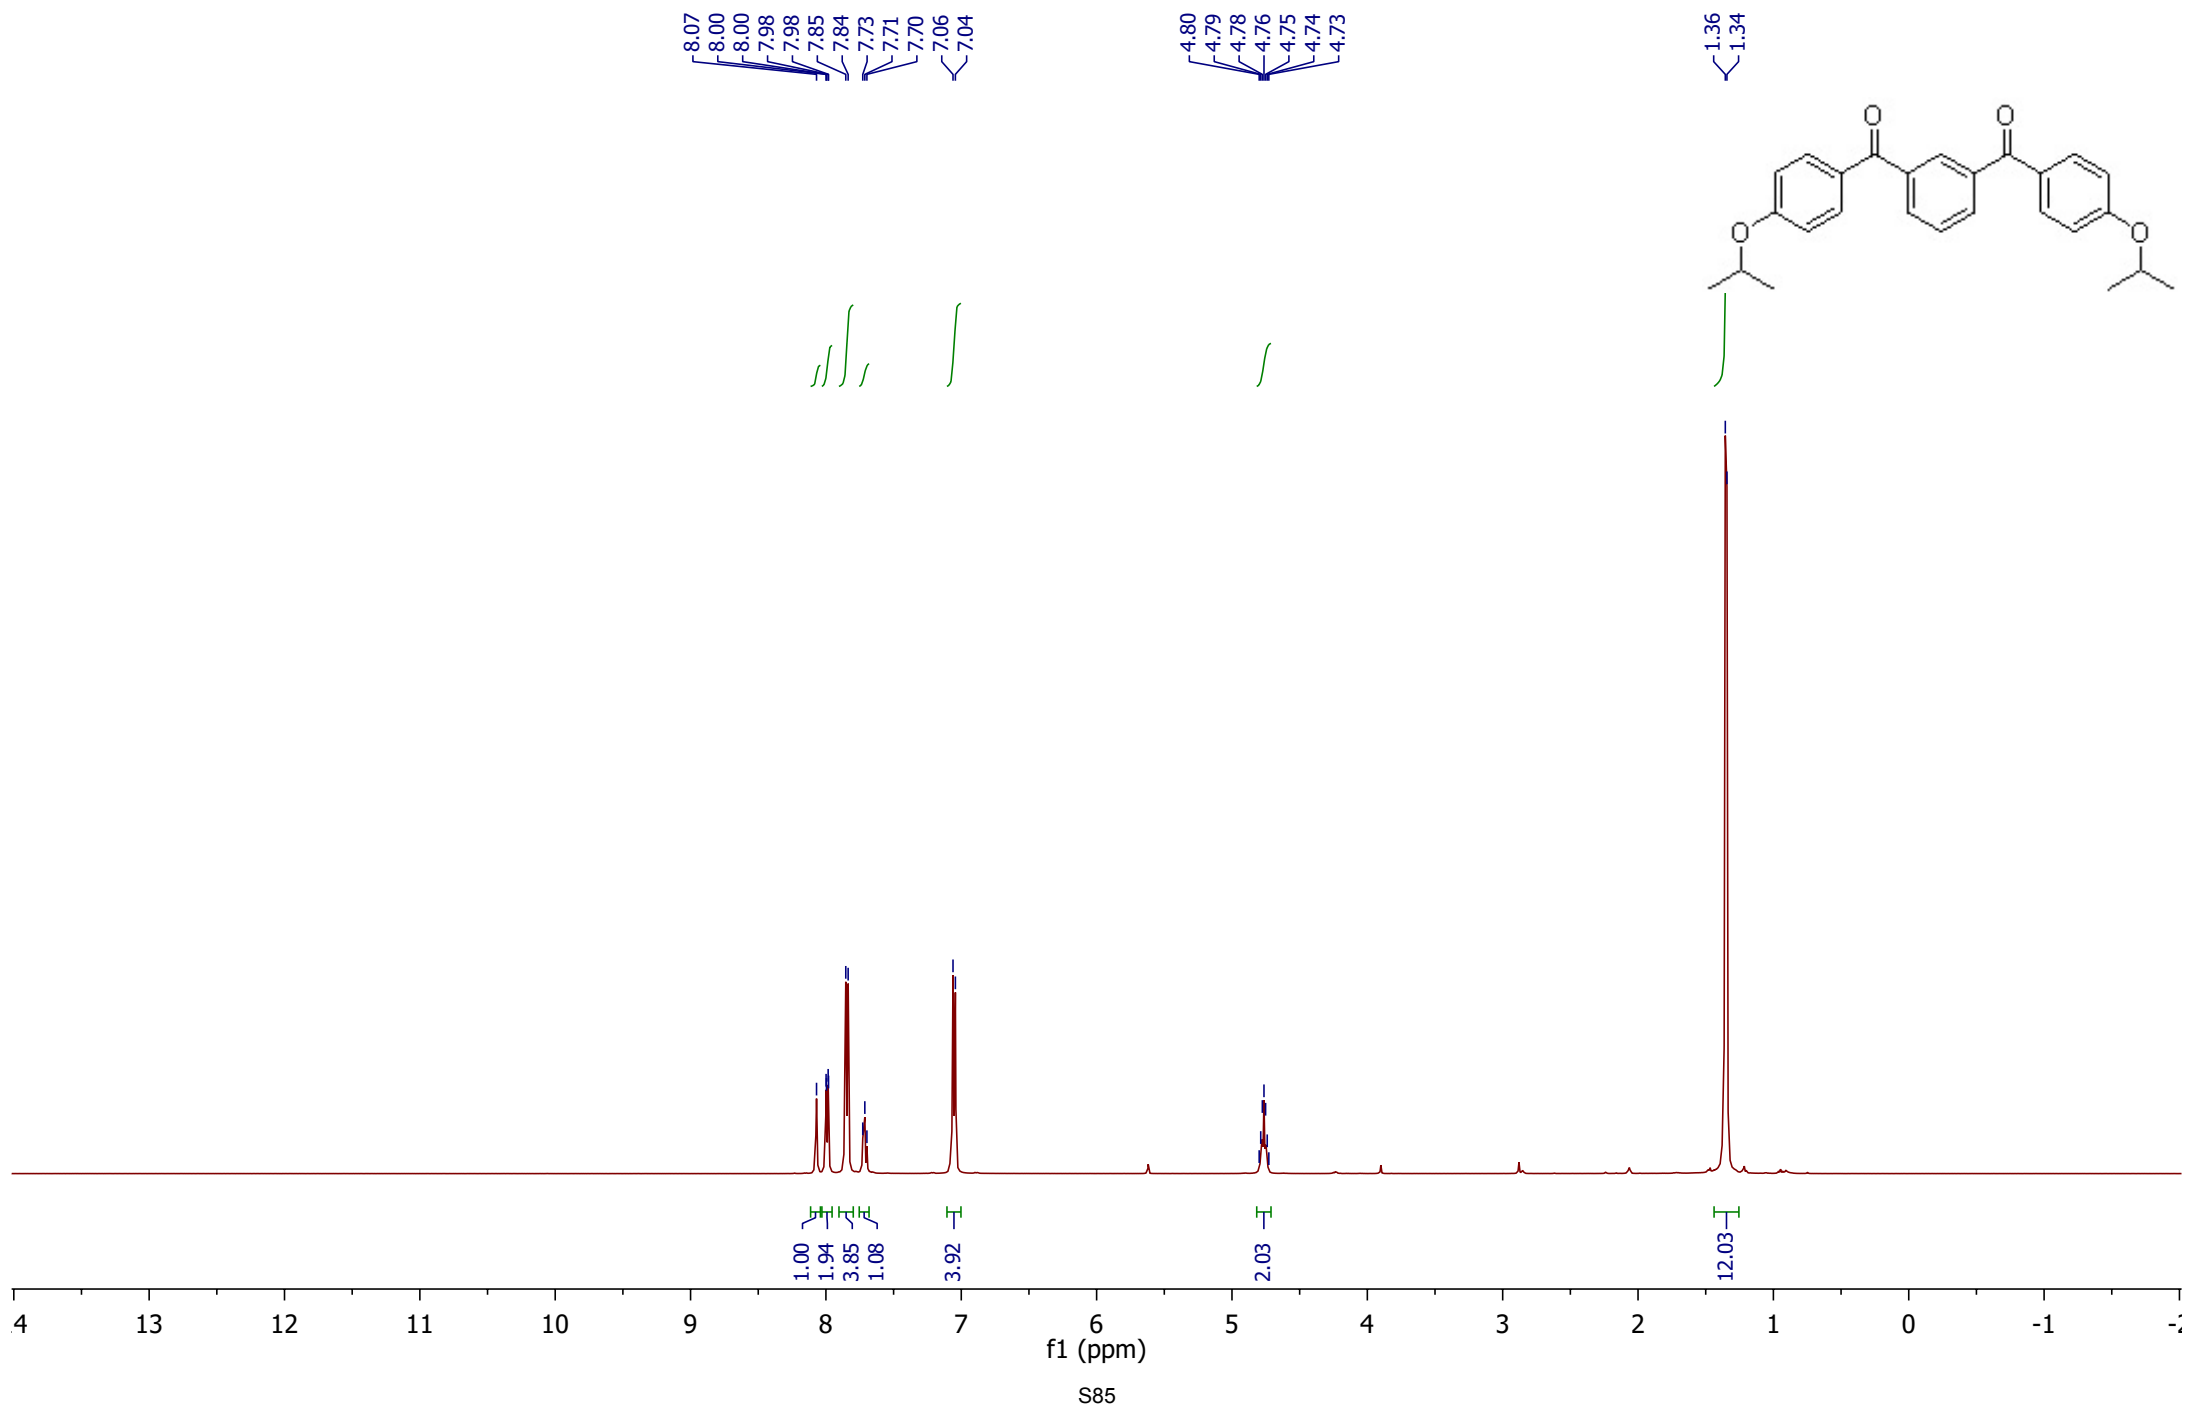

<sup>13</sup>C NMR (125 MHz, Acetone-d<sub>6</sub>) for intermediate between Compound **12** and Compound **14**

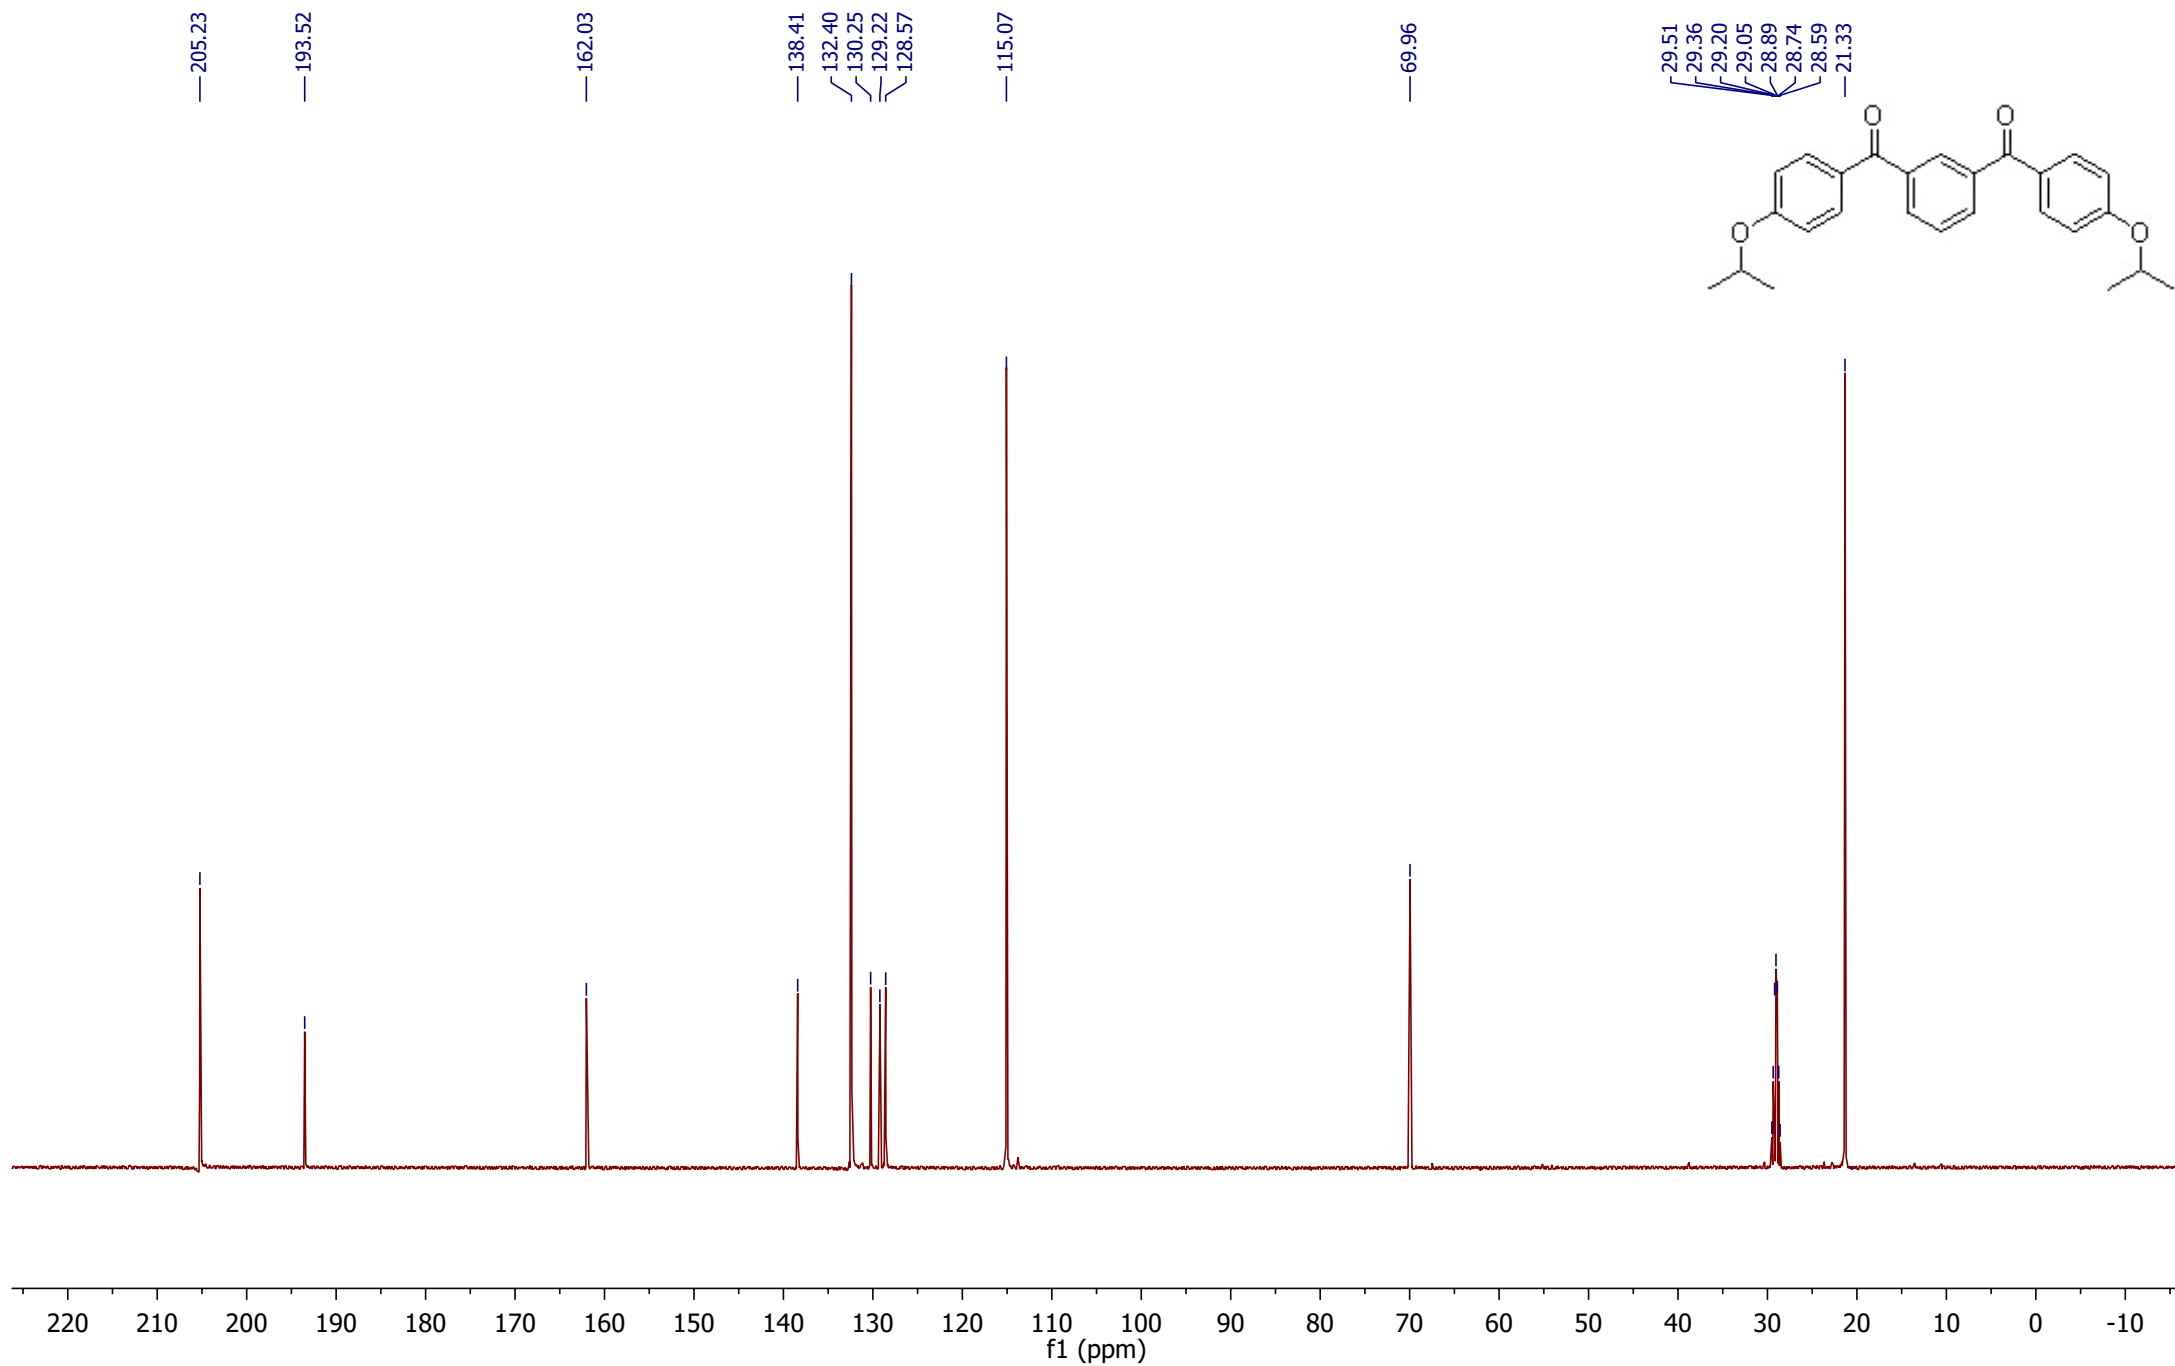

# HRMS (ESI) for intermediate between Compound 12 and 14

C:\Xcalibur\12-19-14\SJL\_III\_146

12/19/2014 10:48:28 AM

SJL\_III\_146 #327-339 RT: 3.28-3.41 AV: 13 NL: 4.65E7  
T: FTMS + p ESI Full ms [100.00-700.00]

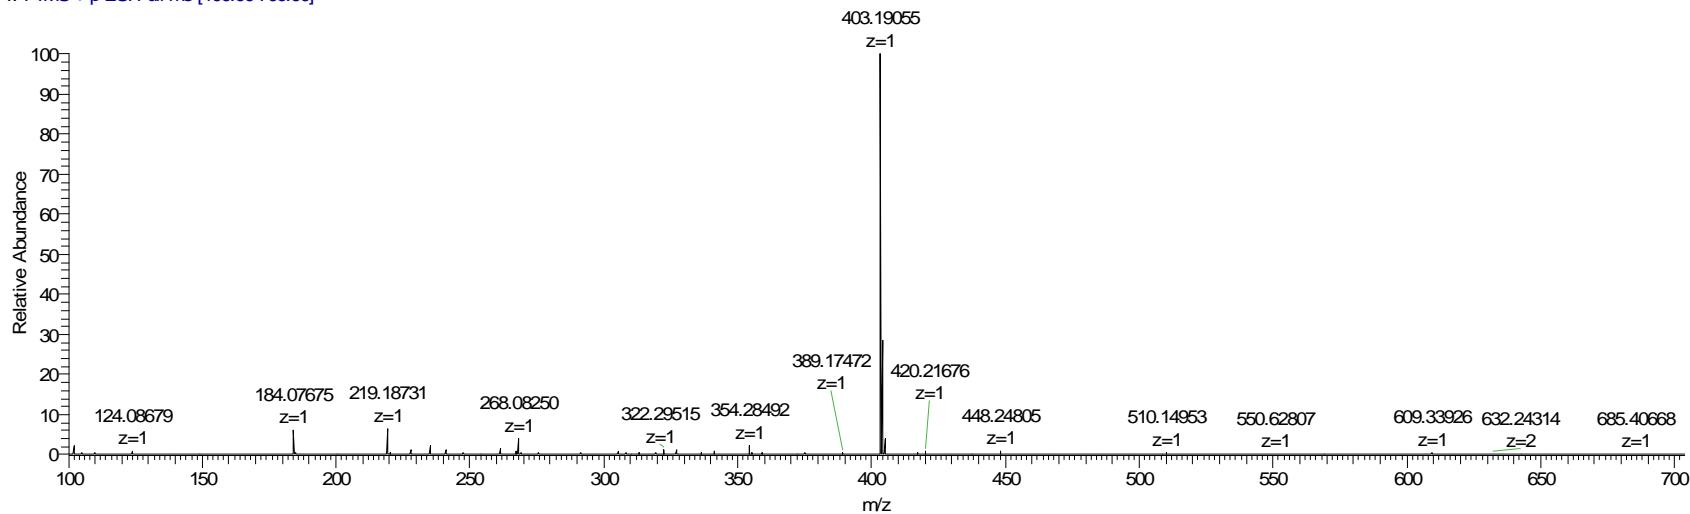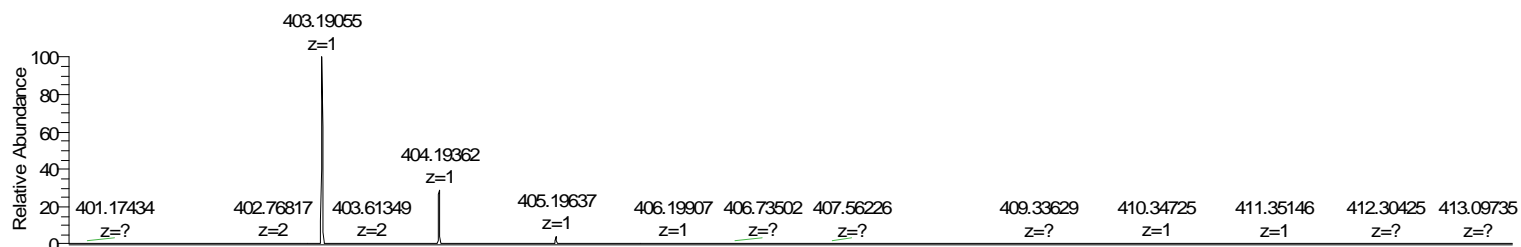

NL:  
4.65E7  
SJL\_III\_146#327-339  
RT: 3.28-3.41 AV: 13  
T: FTMS + p ESI Full  
ms [100.00-700.00]

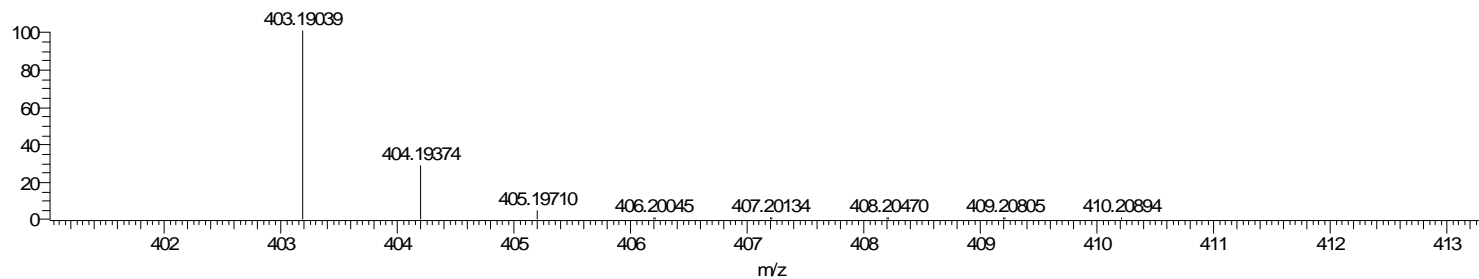

NL:  
7.46E5  
C26H26O4 + H  
C26H27O4  
pa Chrg 1

<sup>1</sup>H NMR (500 MHz, CDCl<sub>3</sub>) for Compound **14**

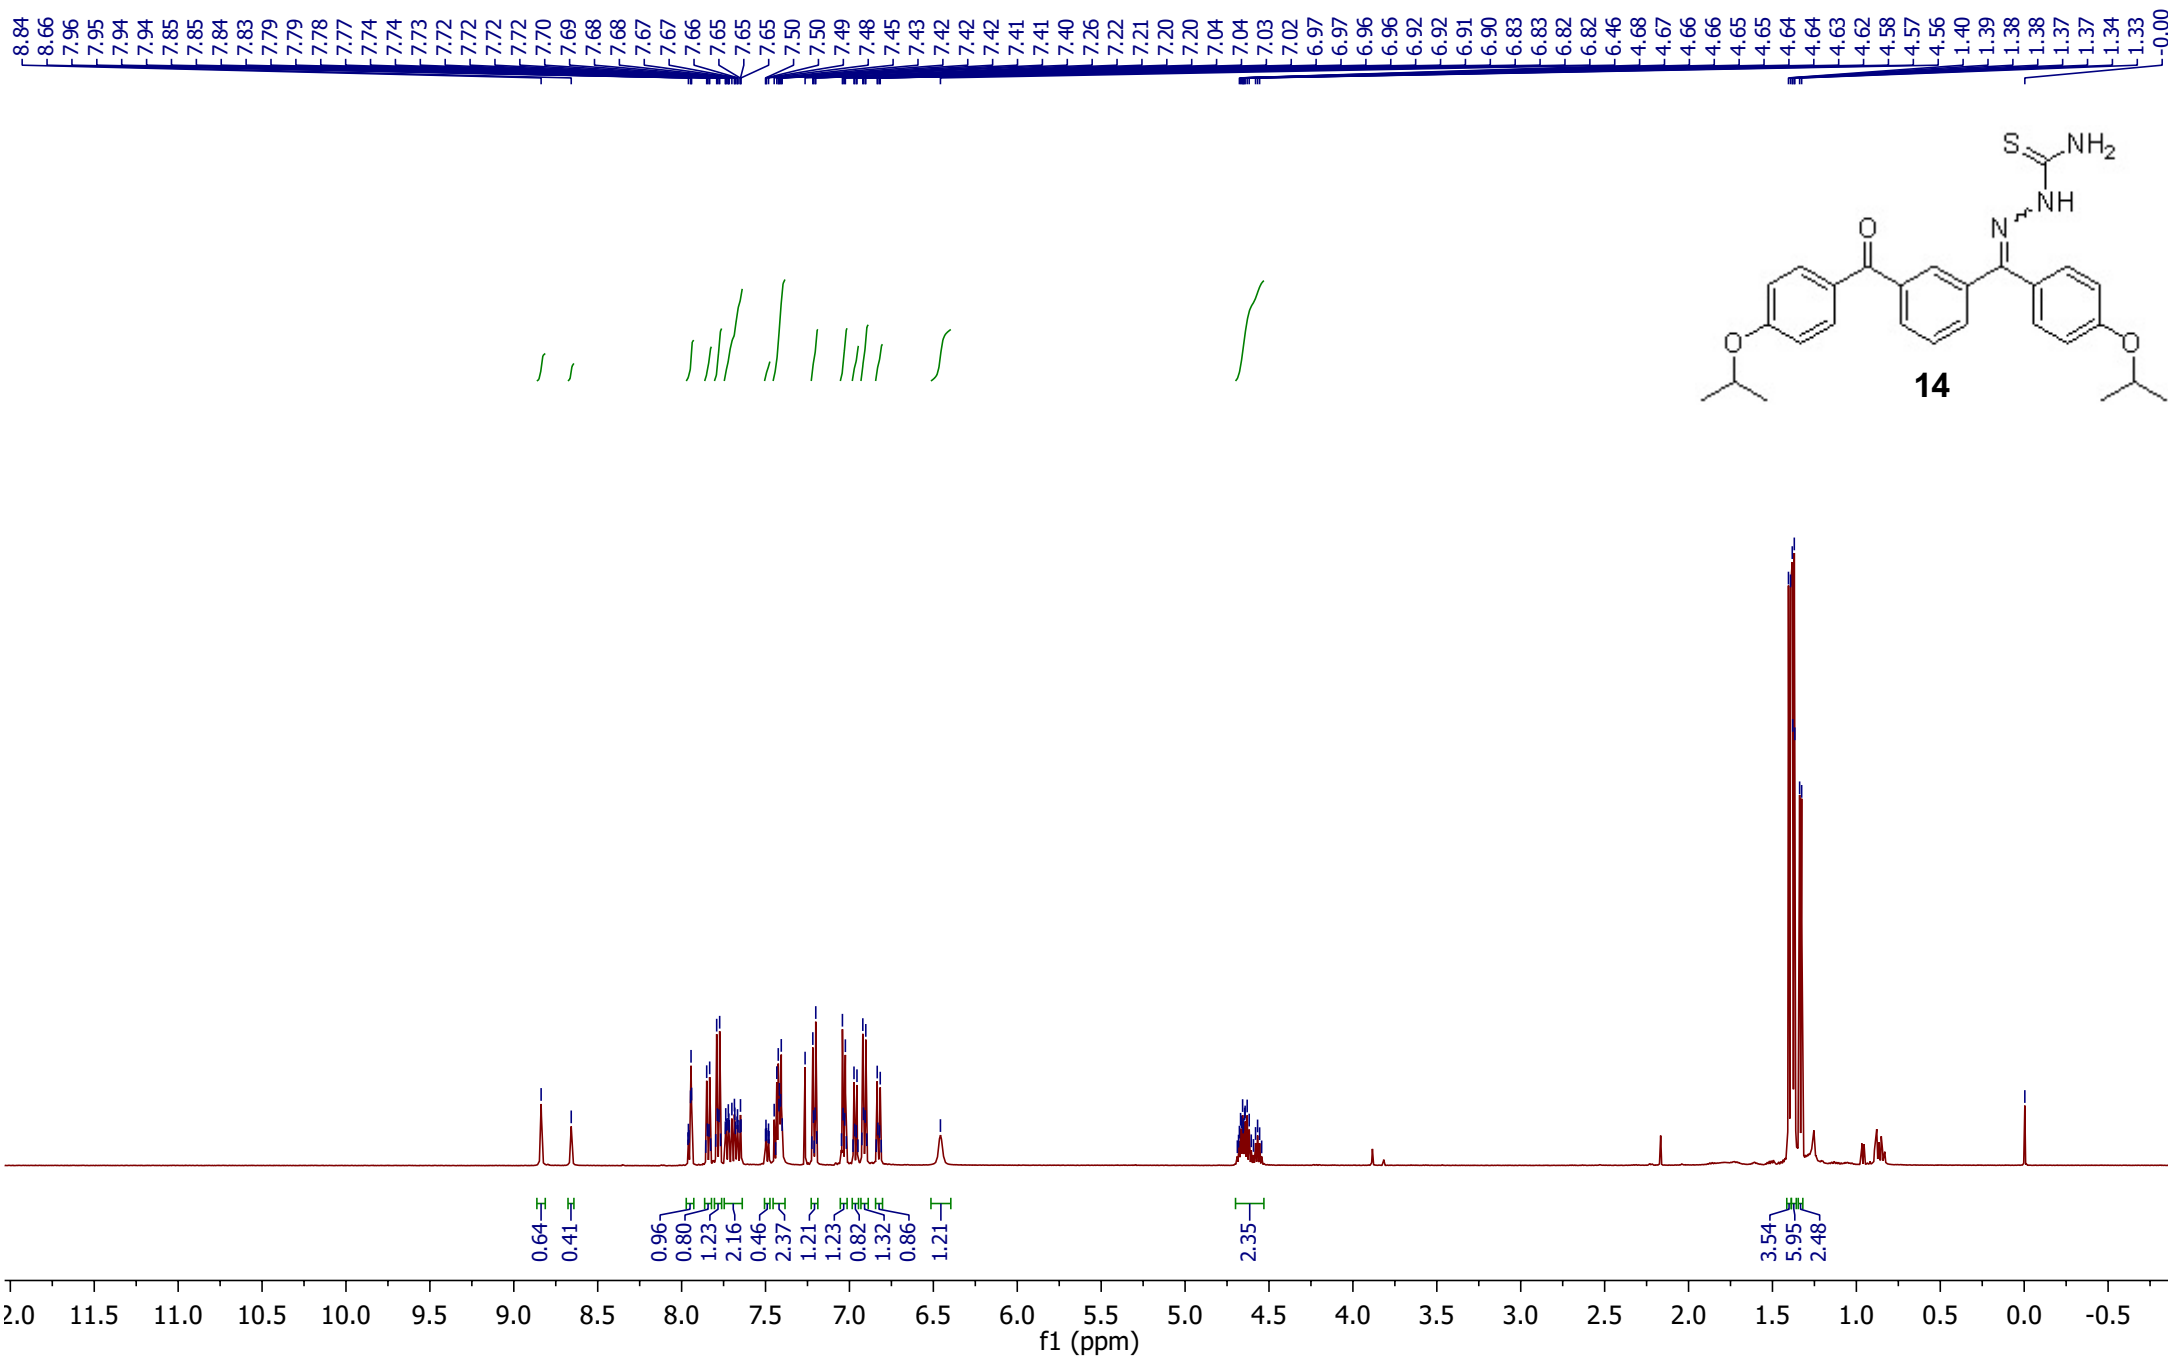



<sup>13</sup>C NMR (125 MHz, CDCl<sub>3</sub>) for Compound **14**

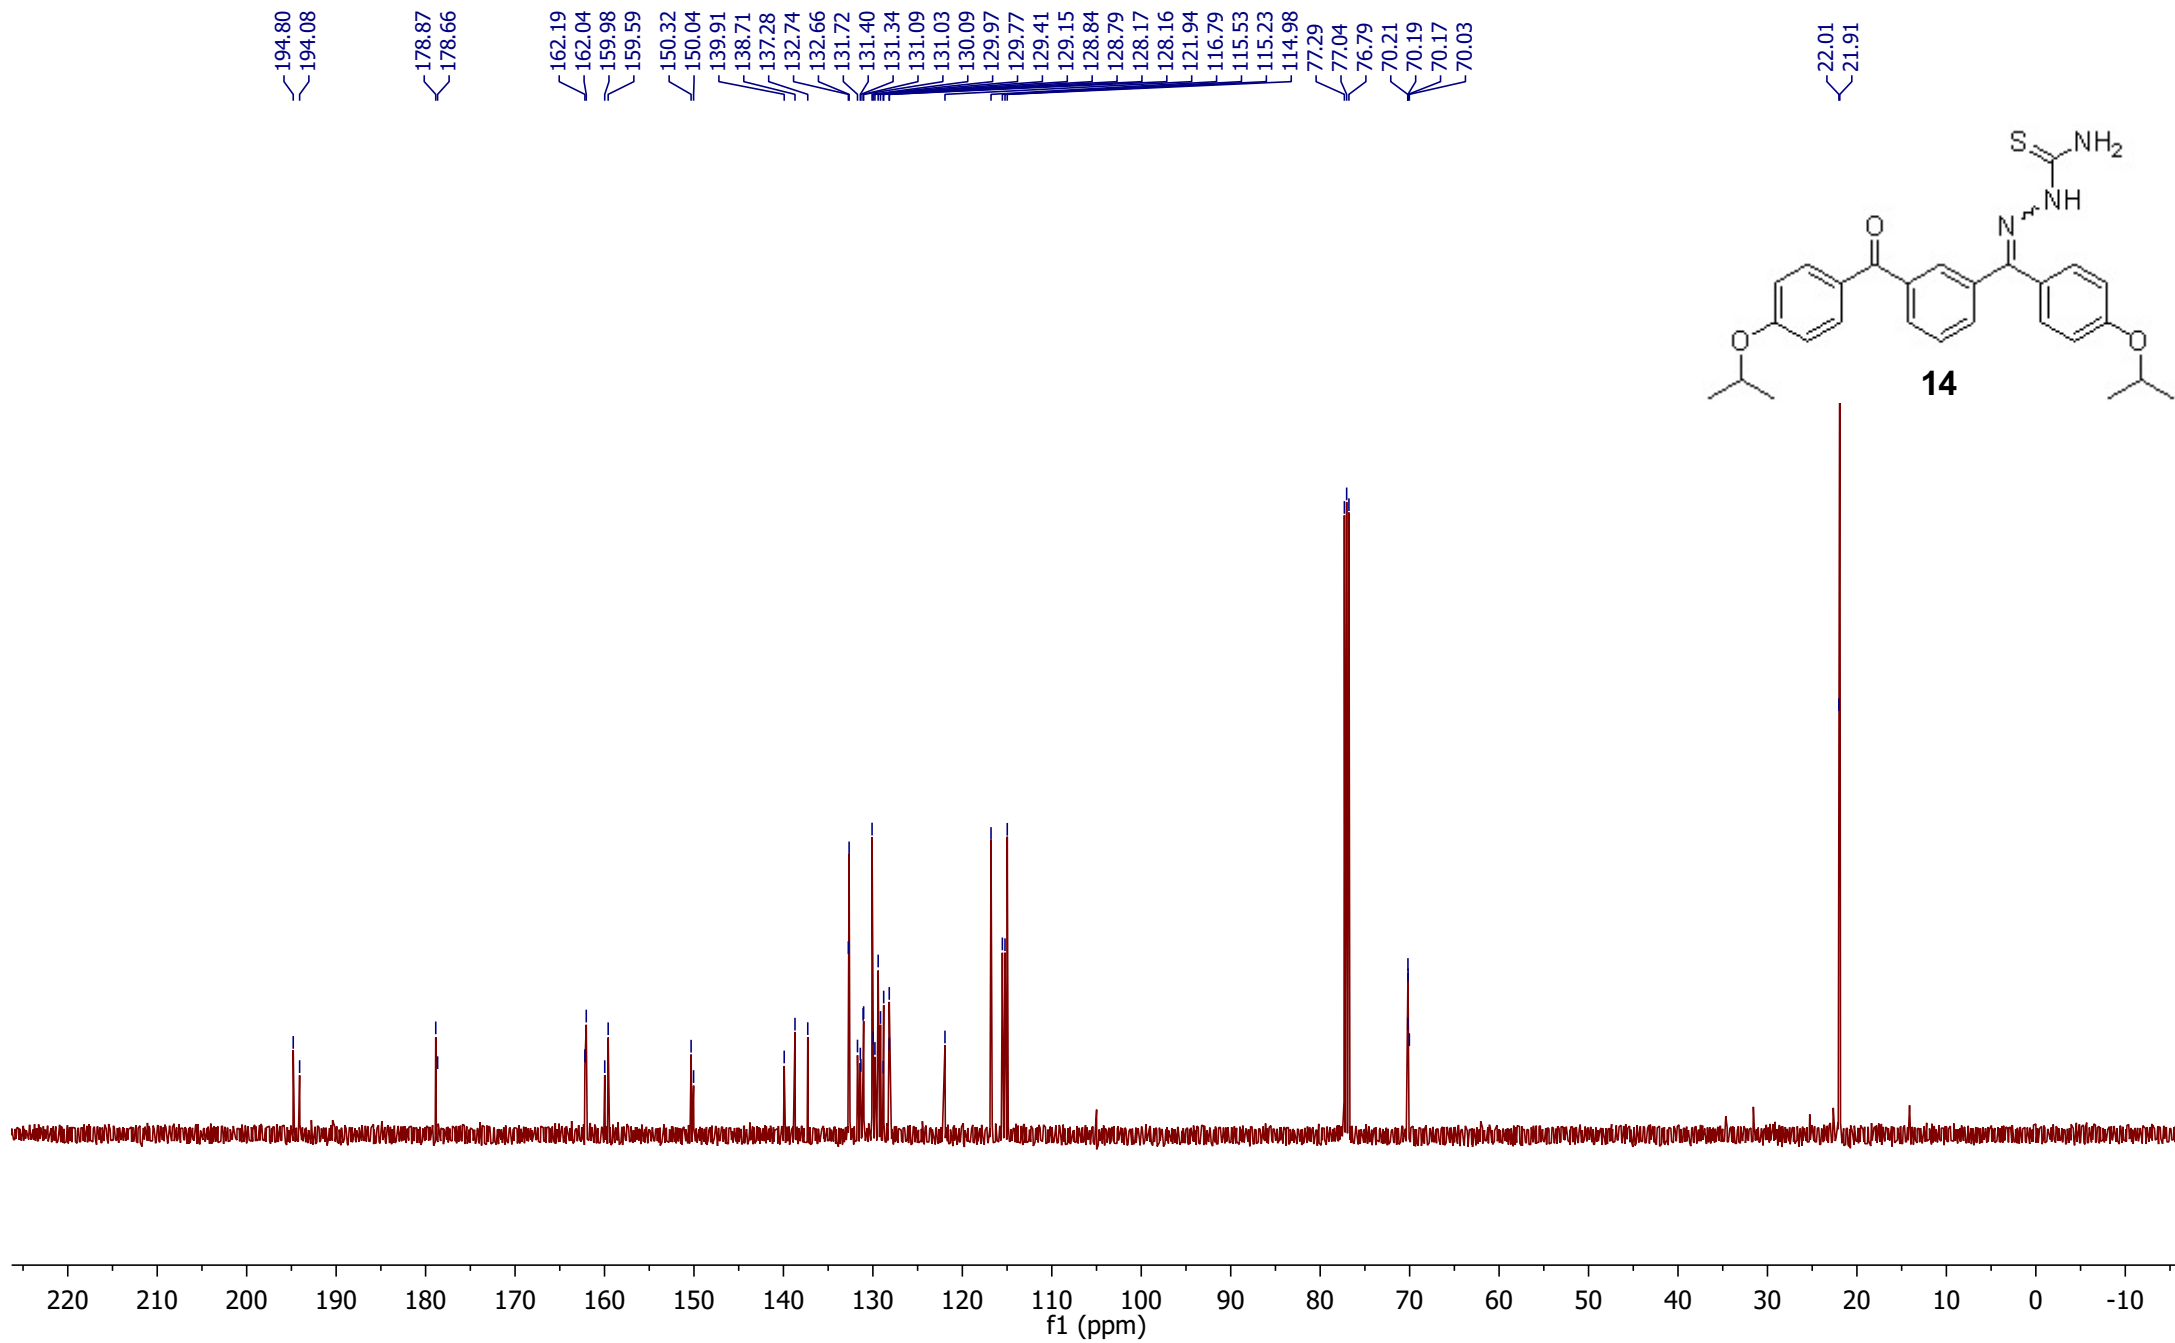

Sample Name: SJLIV029

## HPLC trace for Compound 14

=====

Acq. Operator : ERICAP  
Acq. Instrument : Instrument 1 Location : -  
Injection Date : 8/13/2014 9:29:28 PM  
Acq. Method : C:\CHEM32\1\METHODS\GRAD 2 50-90 ACN.M  
Last changed : 8/13/2014 9:24:17 PM by ERICAP  
Analysis Method : C:\CHEM32\1\DATA\ERICAP\SJLIV029000003.D\DA.M (GRAD 2 50-90 ACN.M)  
Last changed : 12/23/2014 12:02:20 AM by ERICAP  
(modified after loading)  
Sample Info : SJL-IV-029

## Method:

0-25 min. gradient 50:50 to 10:90 Water:ACN  
25-30 min 10:90 Water:ACN

Two peaks observed in the HPLC traces are due to the presence of both E and Z geometrical isomers.

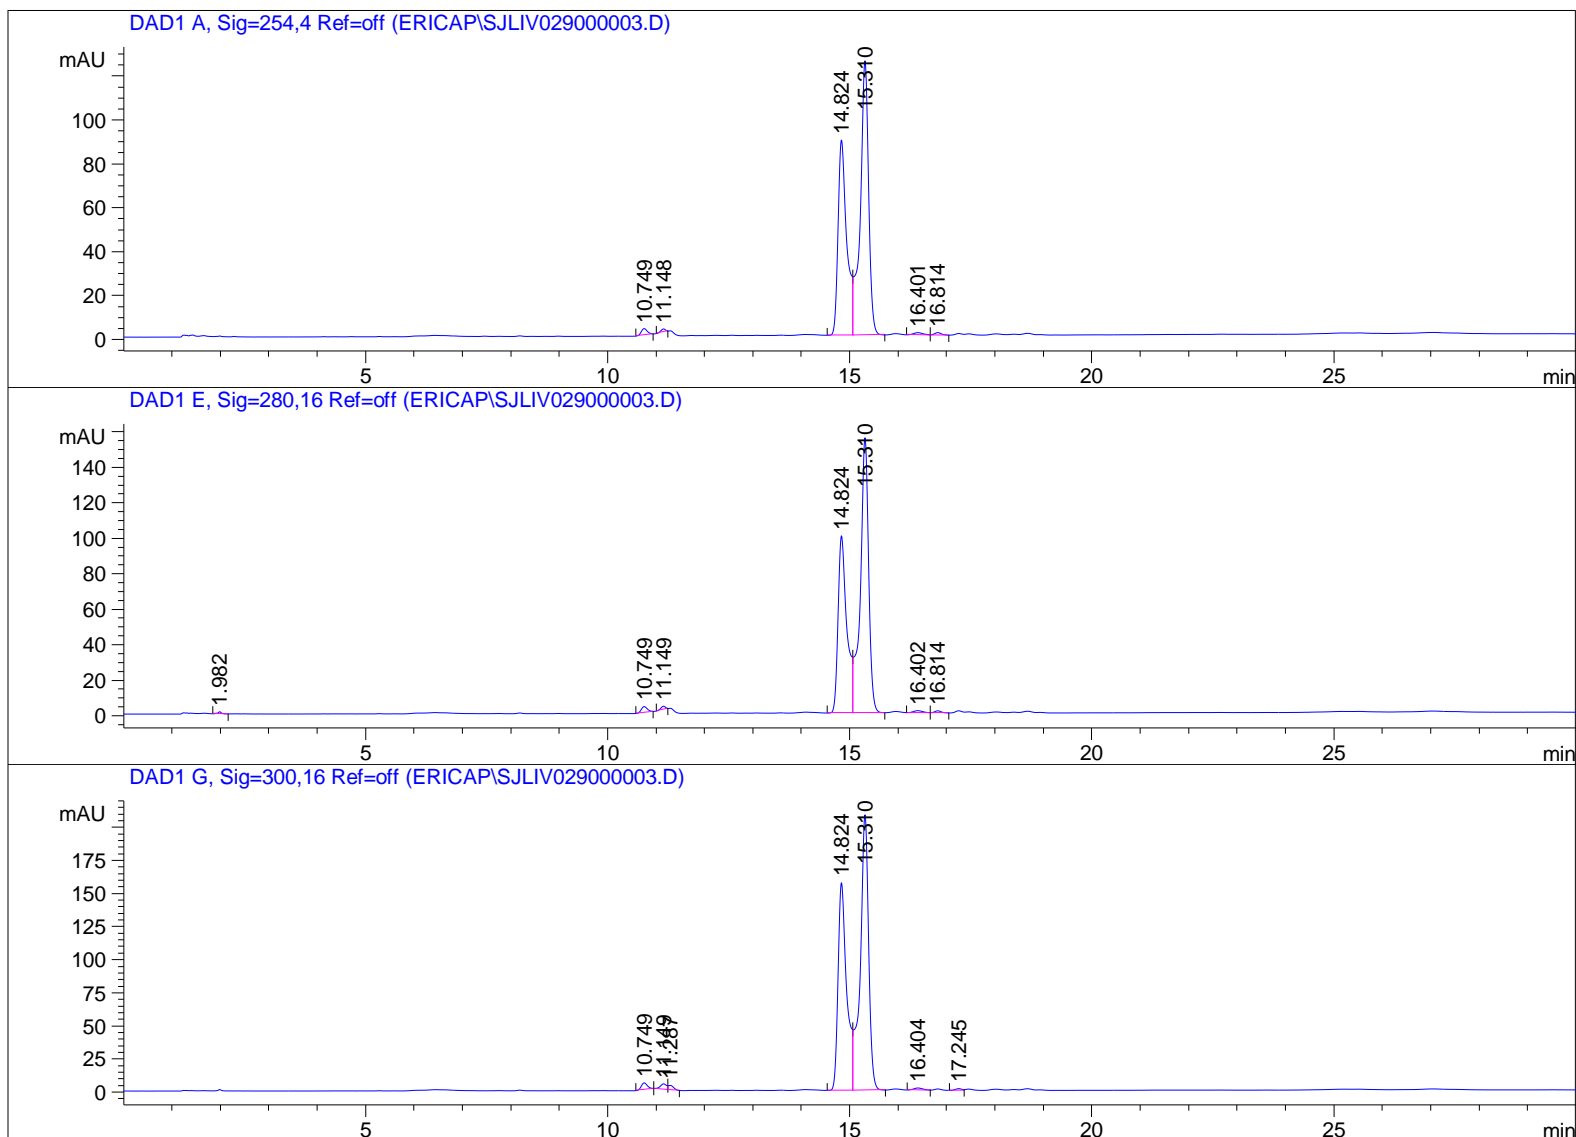

## HPLC trace for Compound 14

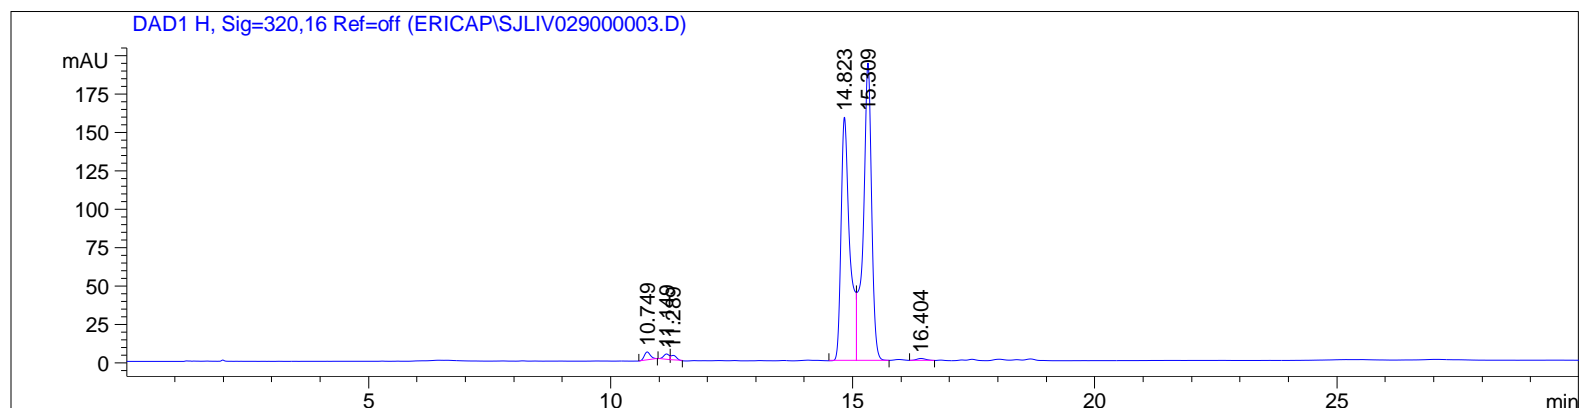

```

=====
                          Area Percent Report
=====

```

```

Sorted By           :      Signal
Multiplier          :      1.0000
Dilution            :      1.0000
Use Multiplier & Dilution Factor with ISTDs

```

Signal 1: DAD1 A, Sig=254,4 Ref=off

| Peak # | RetTime [min] | Type | Width [min] | Area [mAU*s] | Height [mAU] | Area %  |
|--------|---------------|------|-------------|--------------|--------------|---------|
| 1      | 10.749        | BB   | 0.1332      | 25.58280     | 2.94847      | 0.9577  |
| 2      | 11.148        | BB   | 0.1067      | 9.40060      | 1.42943      | 0.3519  |
| 3      | 14.824        | BV   | 0.1824      | 1116.94592   | 89.00146     | 41.8115 |
| 4      | 15.310        | VB   | 0.1756      | 1495.36731   | 124.98199    | 55.9772 |
| 5      | 16.401        | BV   | 0.2082      | 13.79019     | 1.01703      | 0.5162  |
| 6      | 16.814        | VB   | 0.1456      | 10.29943     | 1.09639      | 0.3855  |

Totals :                                   2671.38626   220.47478

Signal 2: DAD1 E, Sig=280,16 Ref=off

| Peak # | RetTime [min] | Type | Width [min] | Area [mAU*s] | Height [mAU] | Area %  |
|--------|---------------|------|-------------|--------------|--------------|---------|
| 1      | 1.982         | BB   | 0.0699      | 5.45845      | 1.14002      | 0.1717  |
| 2      | 10.749        | BB   | 0.1326      | 28.72618     | 3.33248      | 0.9037  |
| 3      | 11.149        | BB   | 0.1070      | 12.14089     | 1.84059      | 0.3819  |
| 4      | 14.824        | BV   | 0.1829      | 1256.60889   | 99.80403     | 39.5320 |
| 5      | 15.310        | VB   | 0.1752      | 1849.91211   | 155.08711    | 58.1969 |
| 6      | 16.402        | BV   | 0.2042      | 15.15580     | 1.14671      | 0.4768  |
| 7      | 16.814        | VB   | 0.1440      | 10.70900     | 1.15686      | 0.3369  |

Totals :                                   3178.71131   263.50780

## HPLC trace for Compound 14

Signal 3: DAD1 G, Sig=300,16 Ref=off

| Peak # | RetTime [min] | Type | Width [min] | Area [mAU*s] | Height [mAU] | Area %  |
|--------|---------------|------|-------------|--------------|--------------|---------|
| 1      | 10.749        | BB   | 0.1339      | 44.75120     | 5.12385      | 0.9734  |
| 2      | 11.149        | BV   | 0.1350      | 36.41380     | 4.04440      | 0.7921  |
| 3      | 11.287        | VB   | 0.1148      | 24.61936     | 3.23311      | 0.5355  |
| 4      | 14.824        | BV   | 0.1822      | 1964.89246   | 156.75853    | 42.7406 |
| 5      | 15.310        | VB   | 0.1759      | 2493.82300   | 207.99771    | 54.2460 |
| 6      | 16.404        | BV   | 0.2044      | 20.89652     | 1.57921      | 0.4545  |
| 7      | 17.245        | BV   | 0.1437      | 11.85075     | 1.26023      | 0.2578  |

Totals : 4597.24708 379.99703

Signal 4: DAD1 H, Sig=320,16 Ref=off

| Peak # | RetTime [min] | Type | Width [min] | Area [mAU*s] | Height [mAU] | Area %  |
|--------|---------------|------|-------------|--------------|--------------|---------|
| 1      | 10.749        | BB   | 0.1354      | 46.18006     | 5.21004      | 1.0421  |
| 2      | 11.149        | BV   | 0.1310      | 30.41051     | 3.51175      | 0.6862  |
| 3      | 11.289        | VB   | 0.1165      | 23.15547     | 2.98347      | 0.5225  |
| 4      | 14.823        | BV   | 0.1819      | 1984.11694   | 158.67049    | 44.7719 |
| 5      | 15.309        | VB   | 0.1763      | 2331.42114   | 193.81932    | 52.6088 |
| 6      | 16.404        | BB   | 0.2011      | 16.33257     | 1.26118      | 0.3685  |

Totals : 4431.61670 365.45624

=====  
\*\*\* End of Report \*\*\*

# HRMS (ESI) for Compound 14

C:\Xcalibur\...song\01-28-13\SJL-2V-029

1/28/2013 8:00:13 PM

SJL-2V-029 #1630 RT: 18.87 AV: 1 NL: 2.28E8  
T: FTMS + p ESI Full ms [200.00-1000.00]

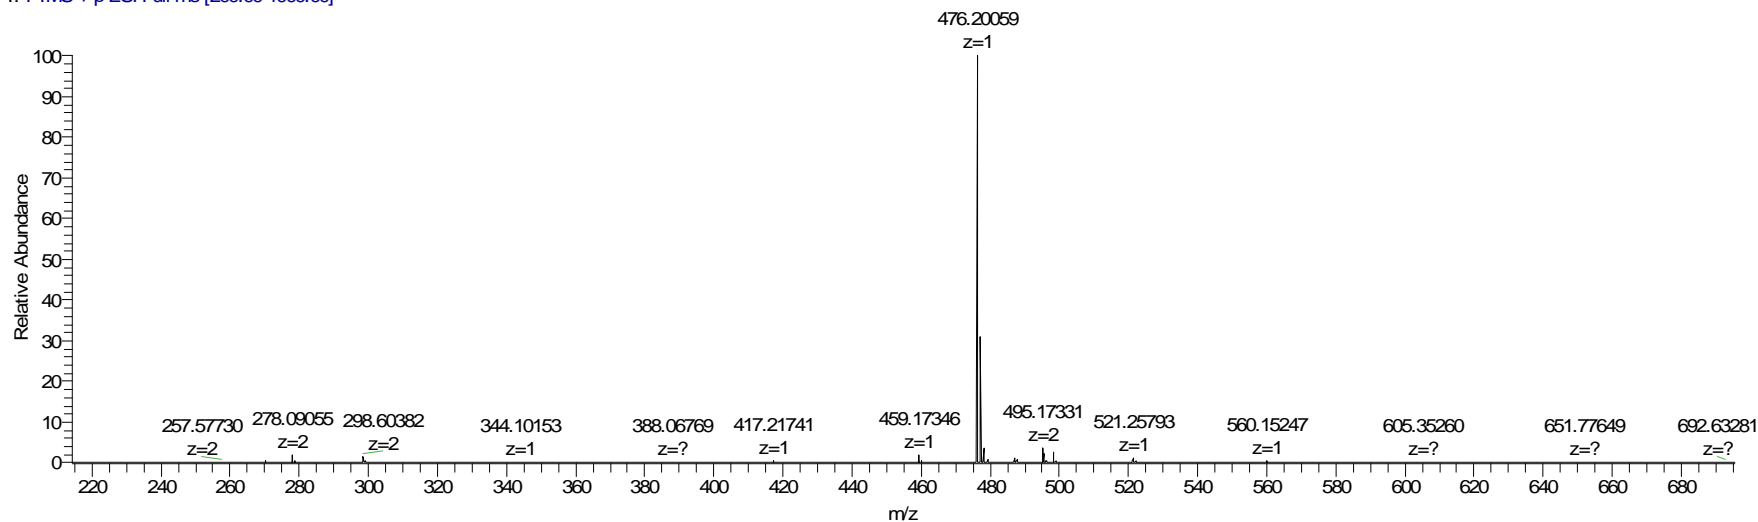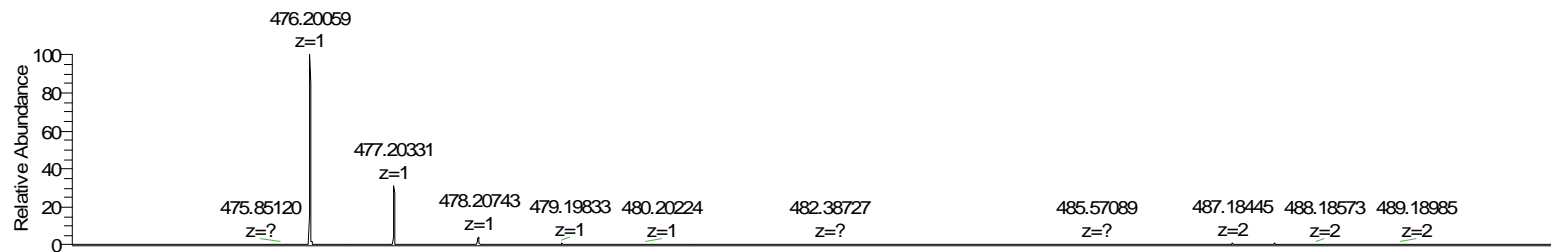

NL:  
2.28E8  
SJL-2V-029#1630  
RT: 18.87 AV: 1 T:  
FTMS + p ESI Full  
ms [200.00-1000.00]

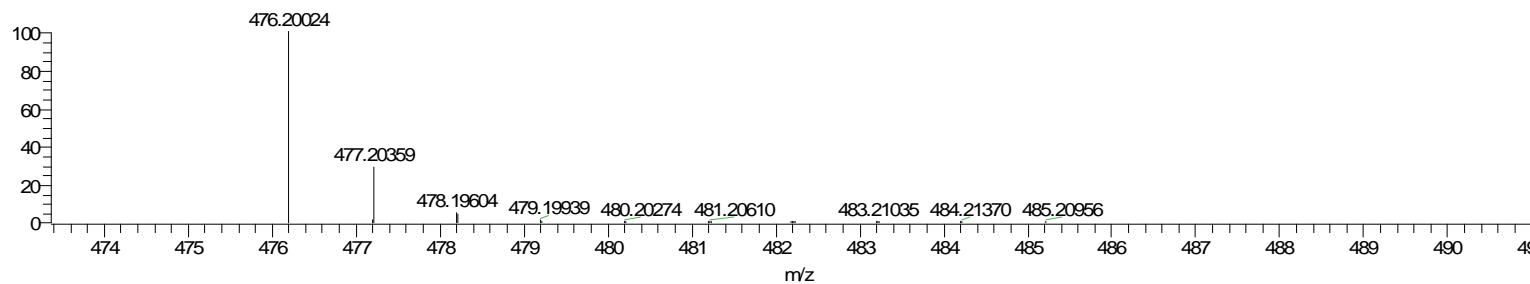

NL:  
6.95E5  
C27H29N3O3S+H  
C27H30N3O3S1  
pa Chrg 1

<sup>1</sup>H NMR (600 MHz, DMSO-d<sub>6</sub>) of intermediate for Compound **15**

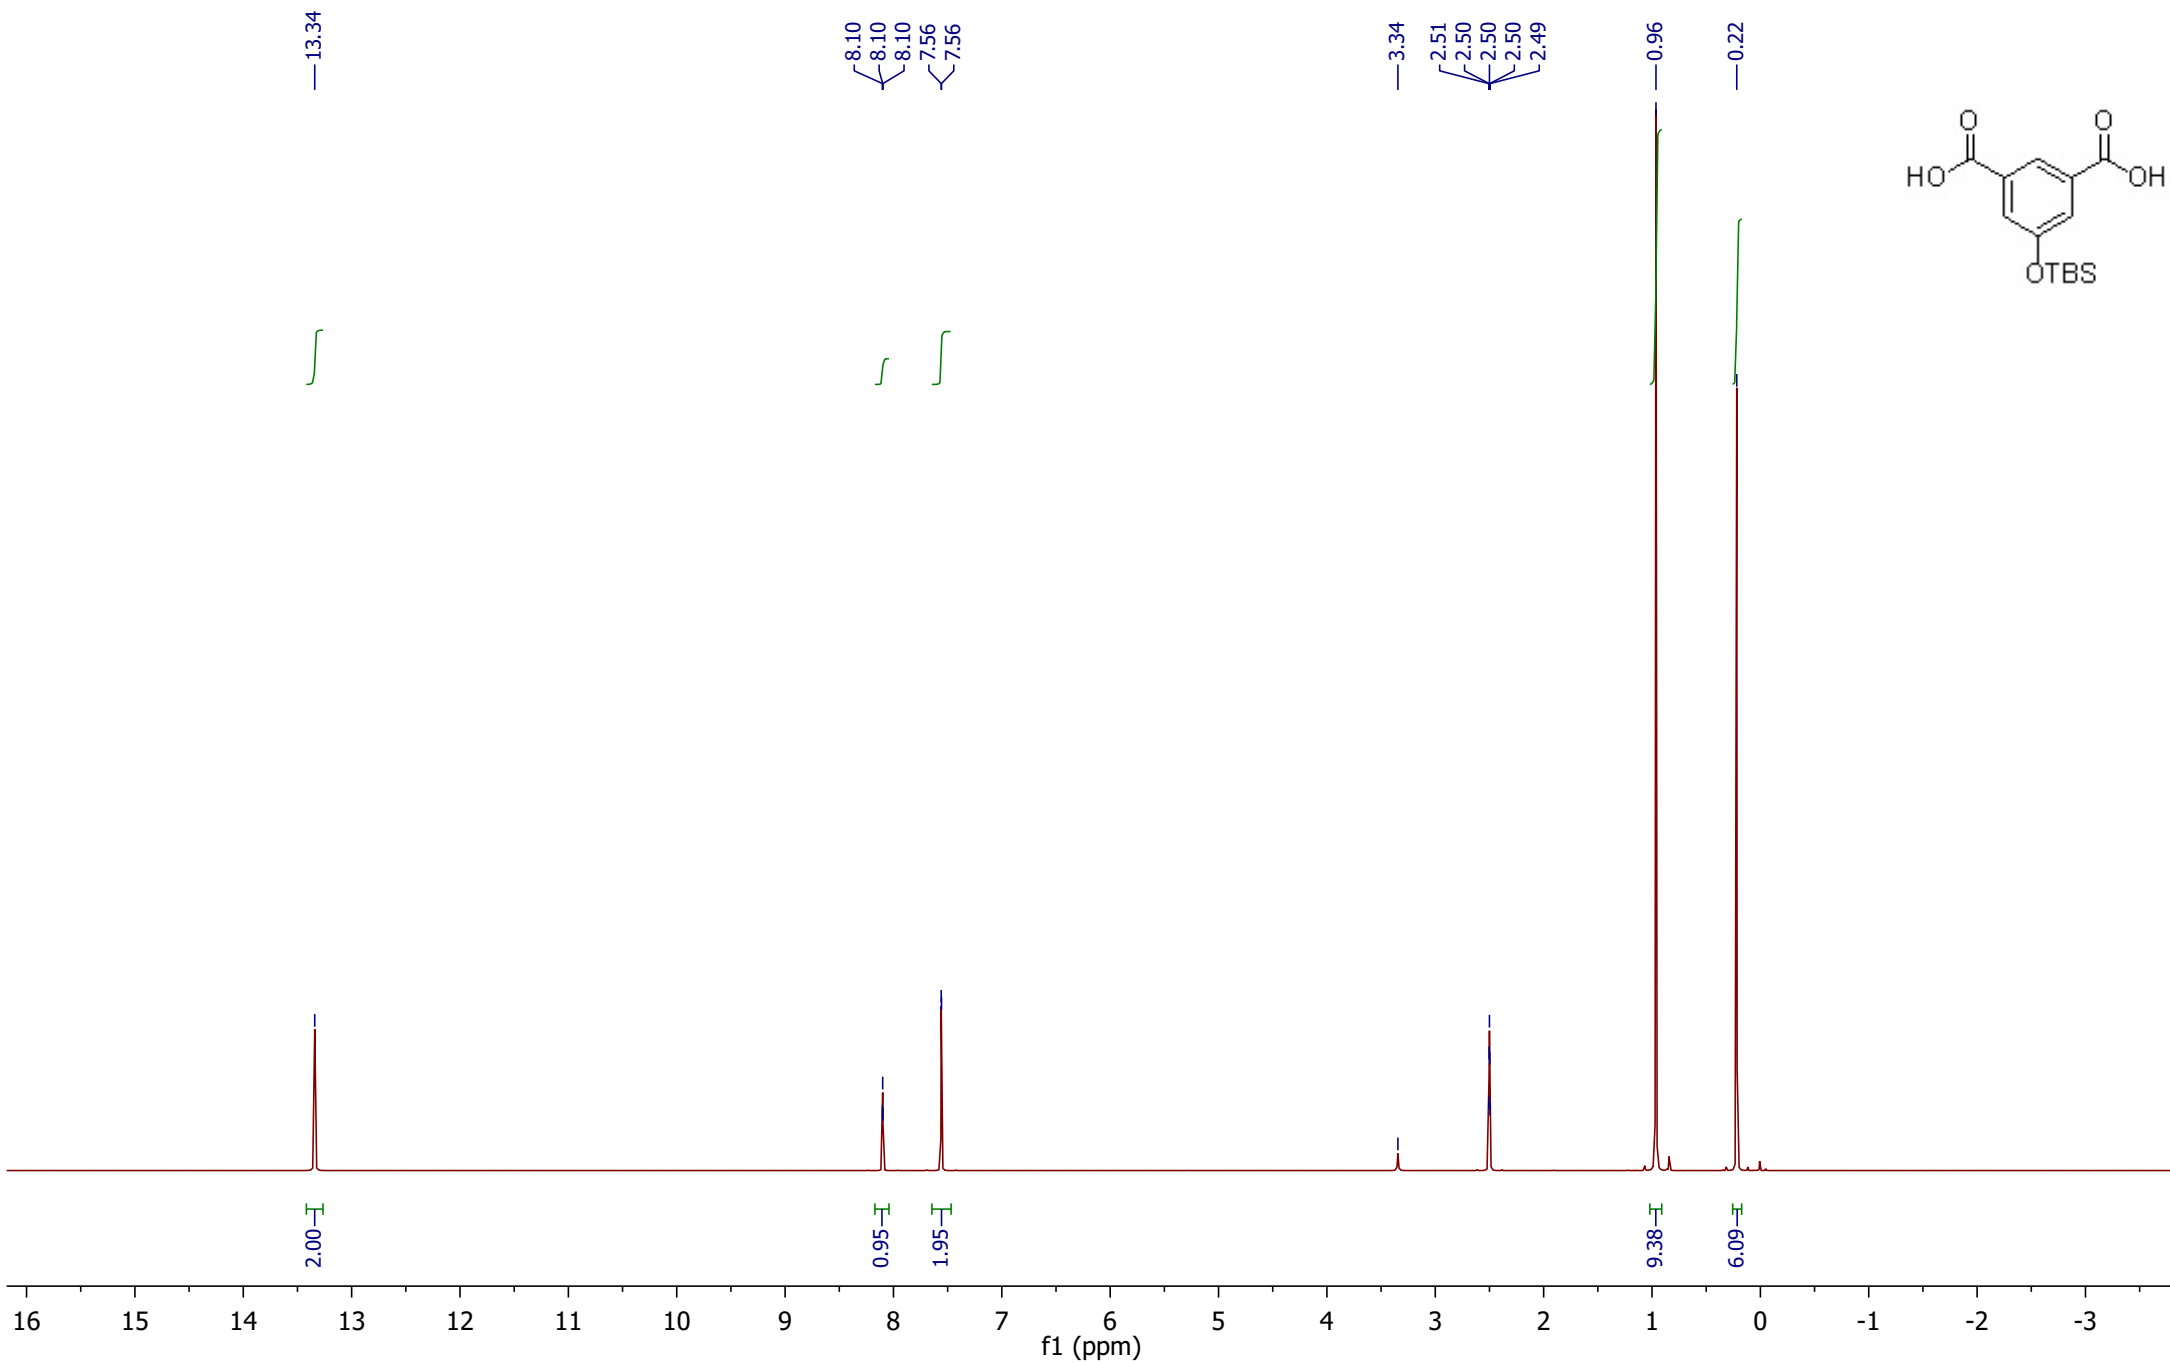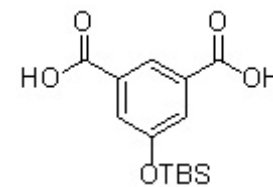

<sup>13</sup>C NMR (150 MHz, DMSO-d<sub>6</sub>) of intermediate for Compound **15**

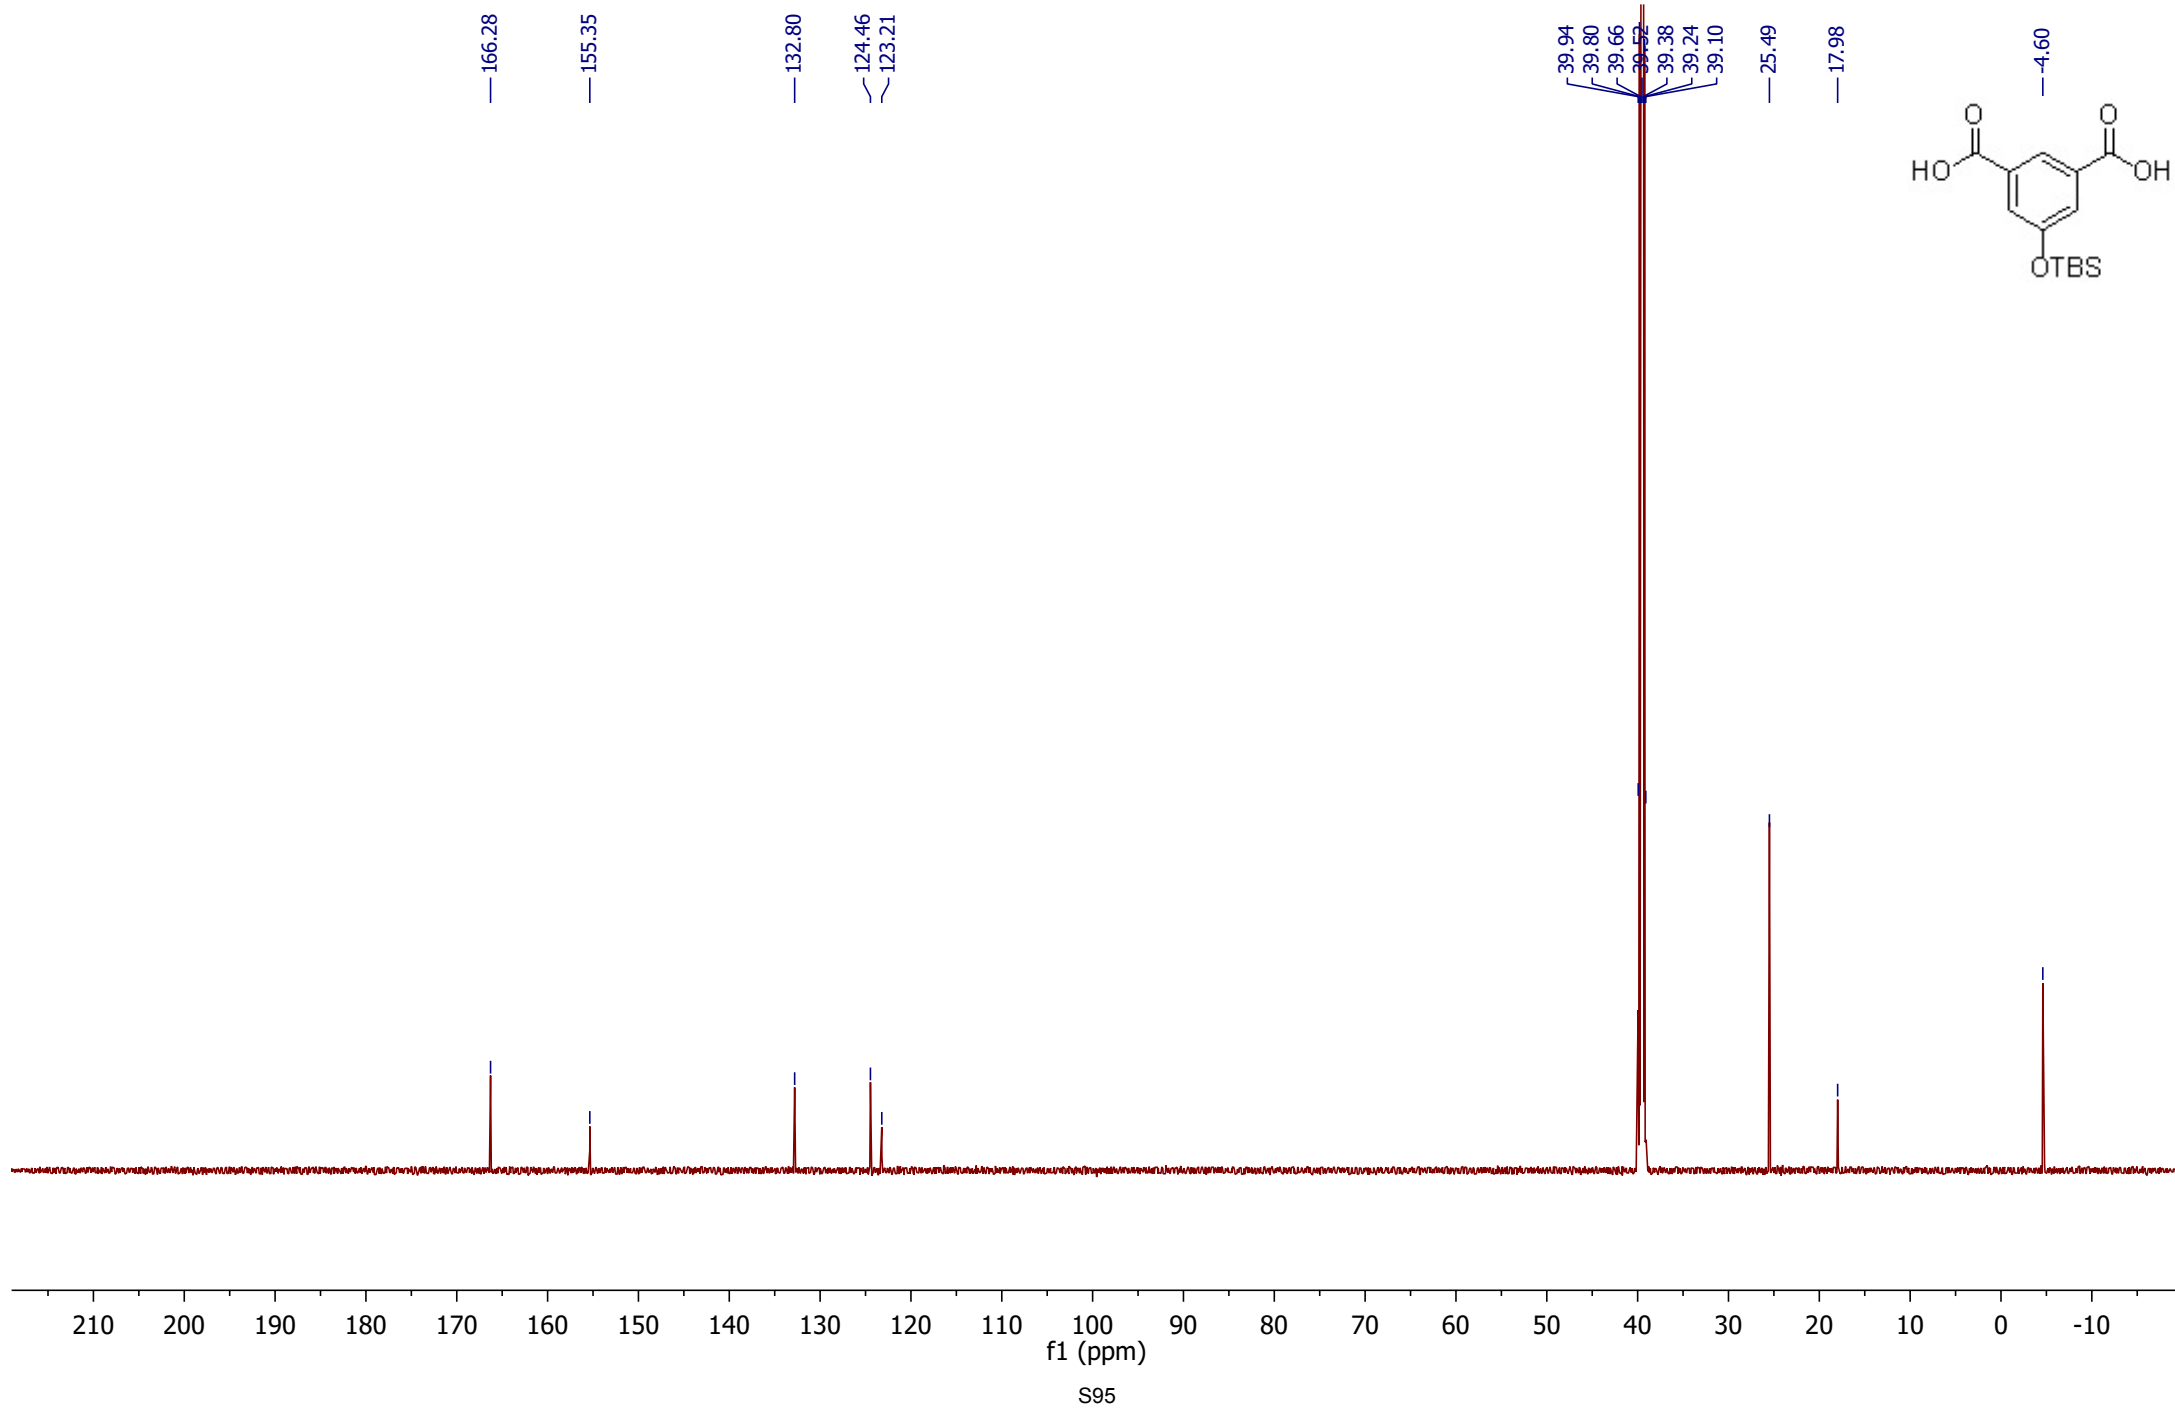

# HRMS (ESI) for intermediate before Compound 15

C:\Xcalibur...ENP\_IV\_98\_run2\_Orbi\_+ESI

12/30/2014 4:26:22 PM

ENP\_IV\_98\_run2\_Orbi\_+ESI #10 RT: 0.11 AV: 1 NL: 3.00E6  
T: FTMS + c ESI Full ms [150.00-600.00]

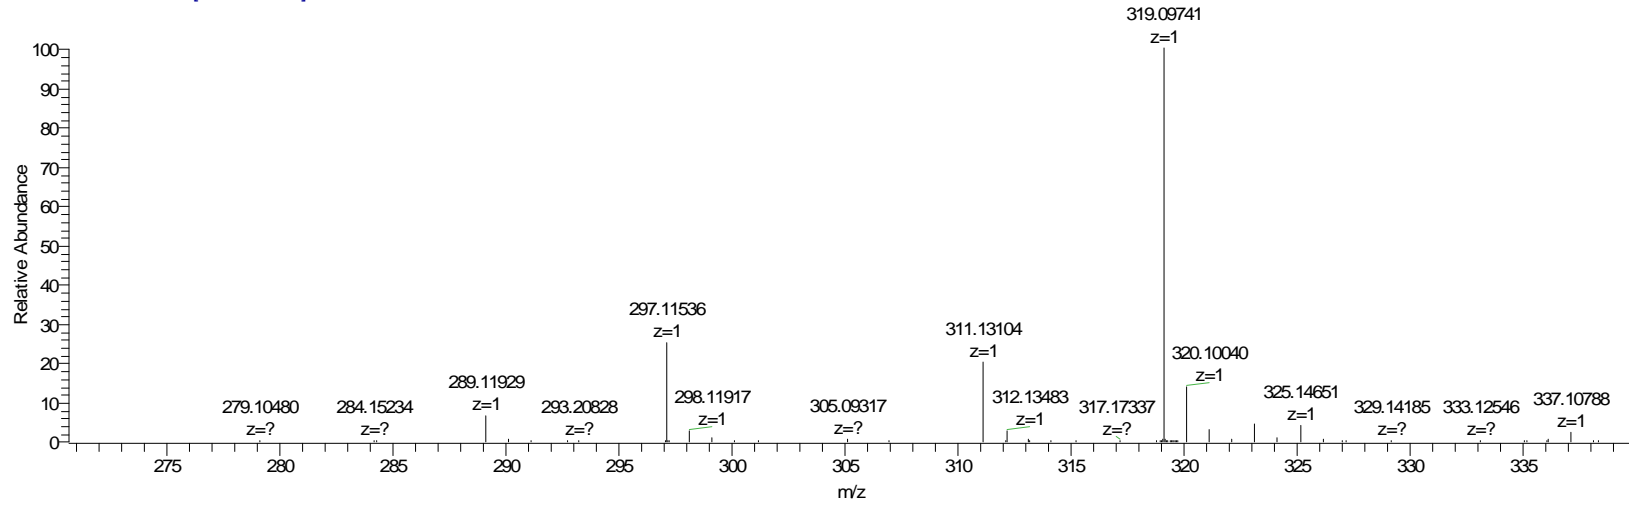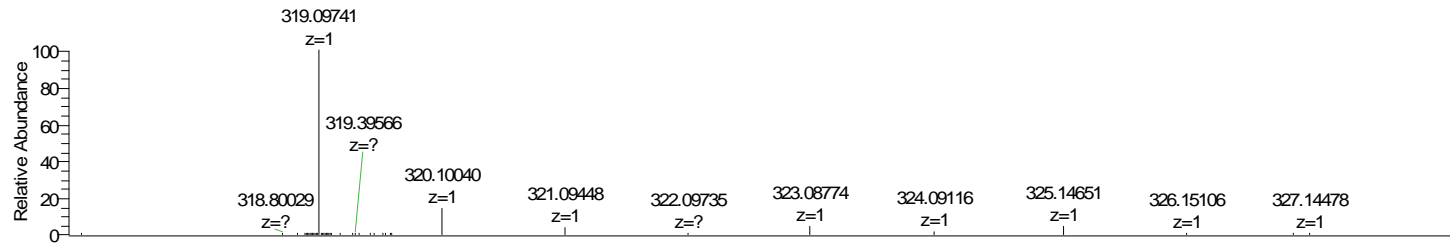

NL:  
3.00E6  
ENP\_IV\_98\_run2\_Orbi\_+ESI#10 RT: 0.11  
AV: 1 T: FTMS + c  
ESI Full ms  
[150.00-600.00]

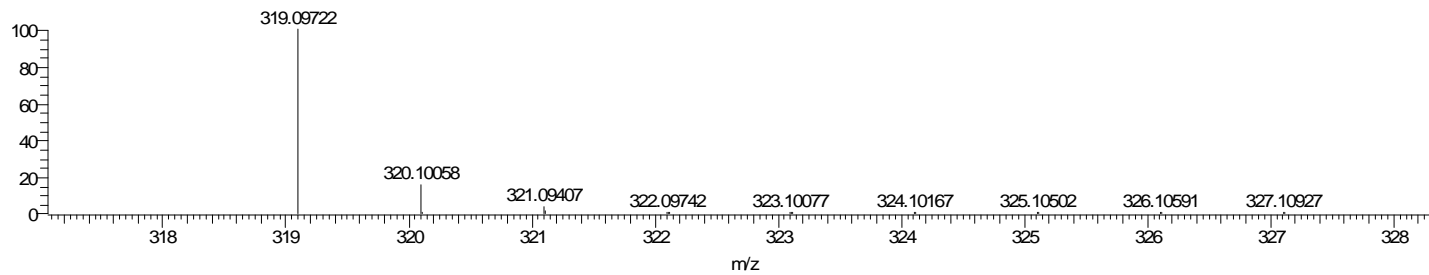

NL:  
7.82E5  
C<sub>14</sub>H<sub>20</sub>O<sub>5</sub>Si +Na:  
C<sub>14</sub>H<sub>20</sub>O<sub>5</sub>Si<sub>1</sub>Na<sub>1</sub>  
pa Chrg 1



<sup>1</sup>H NMR (500 MHz, CDCl<sub>3</sub>) of Compound **15**

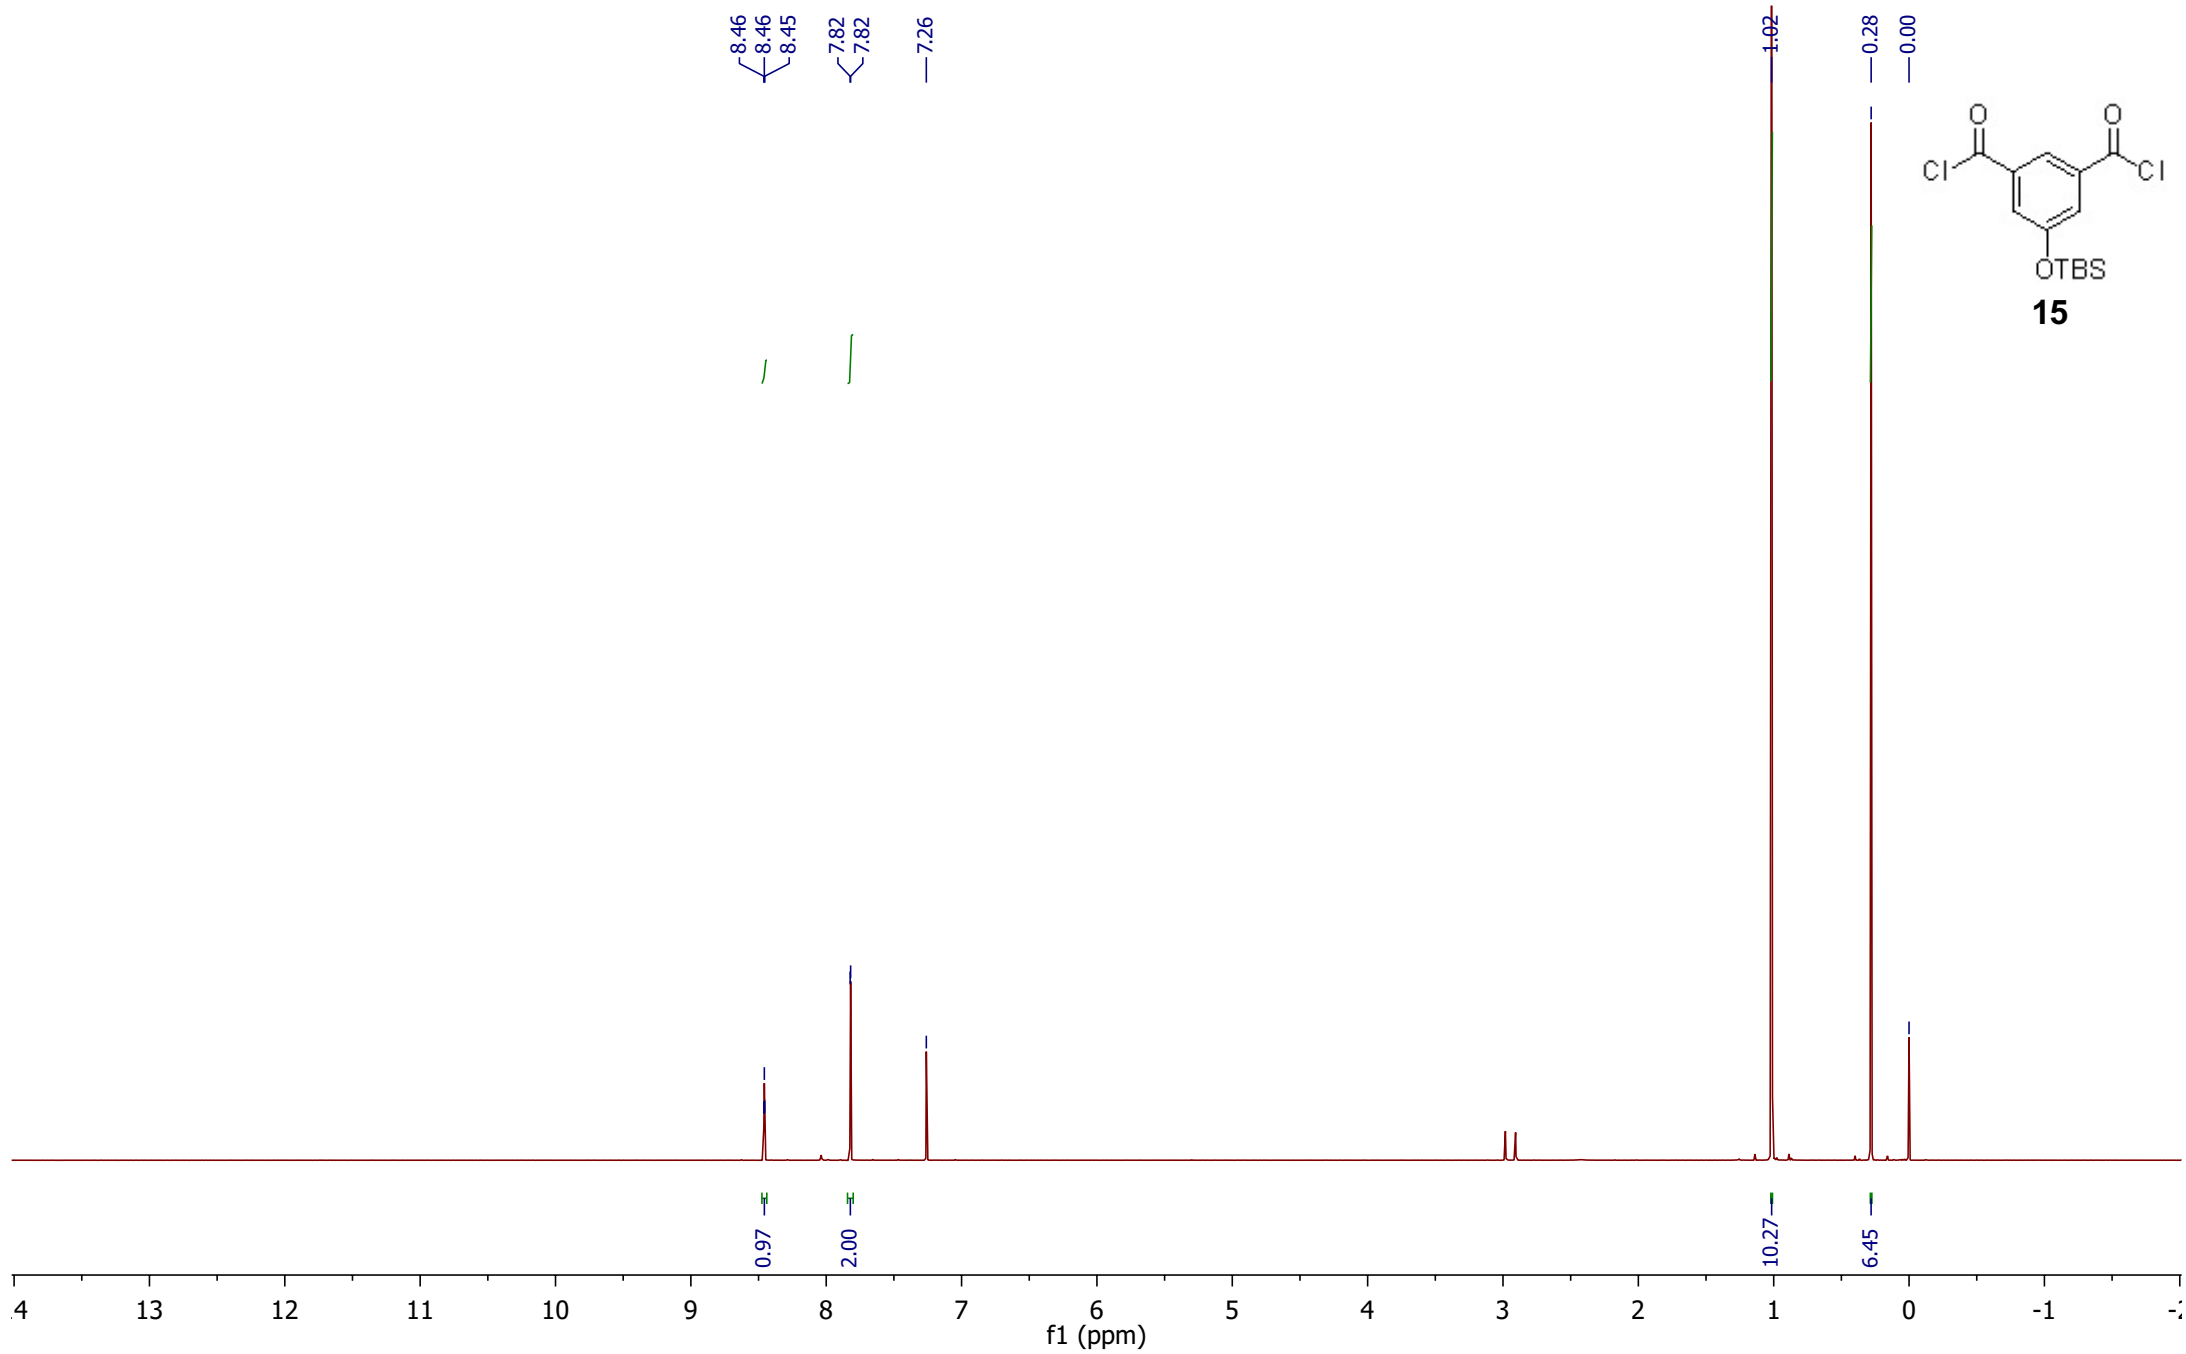

$^{13}\text{C}$  NMR (125 MHz,  $\text{CDCl}_3$ ) of Compound **15**

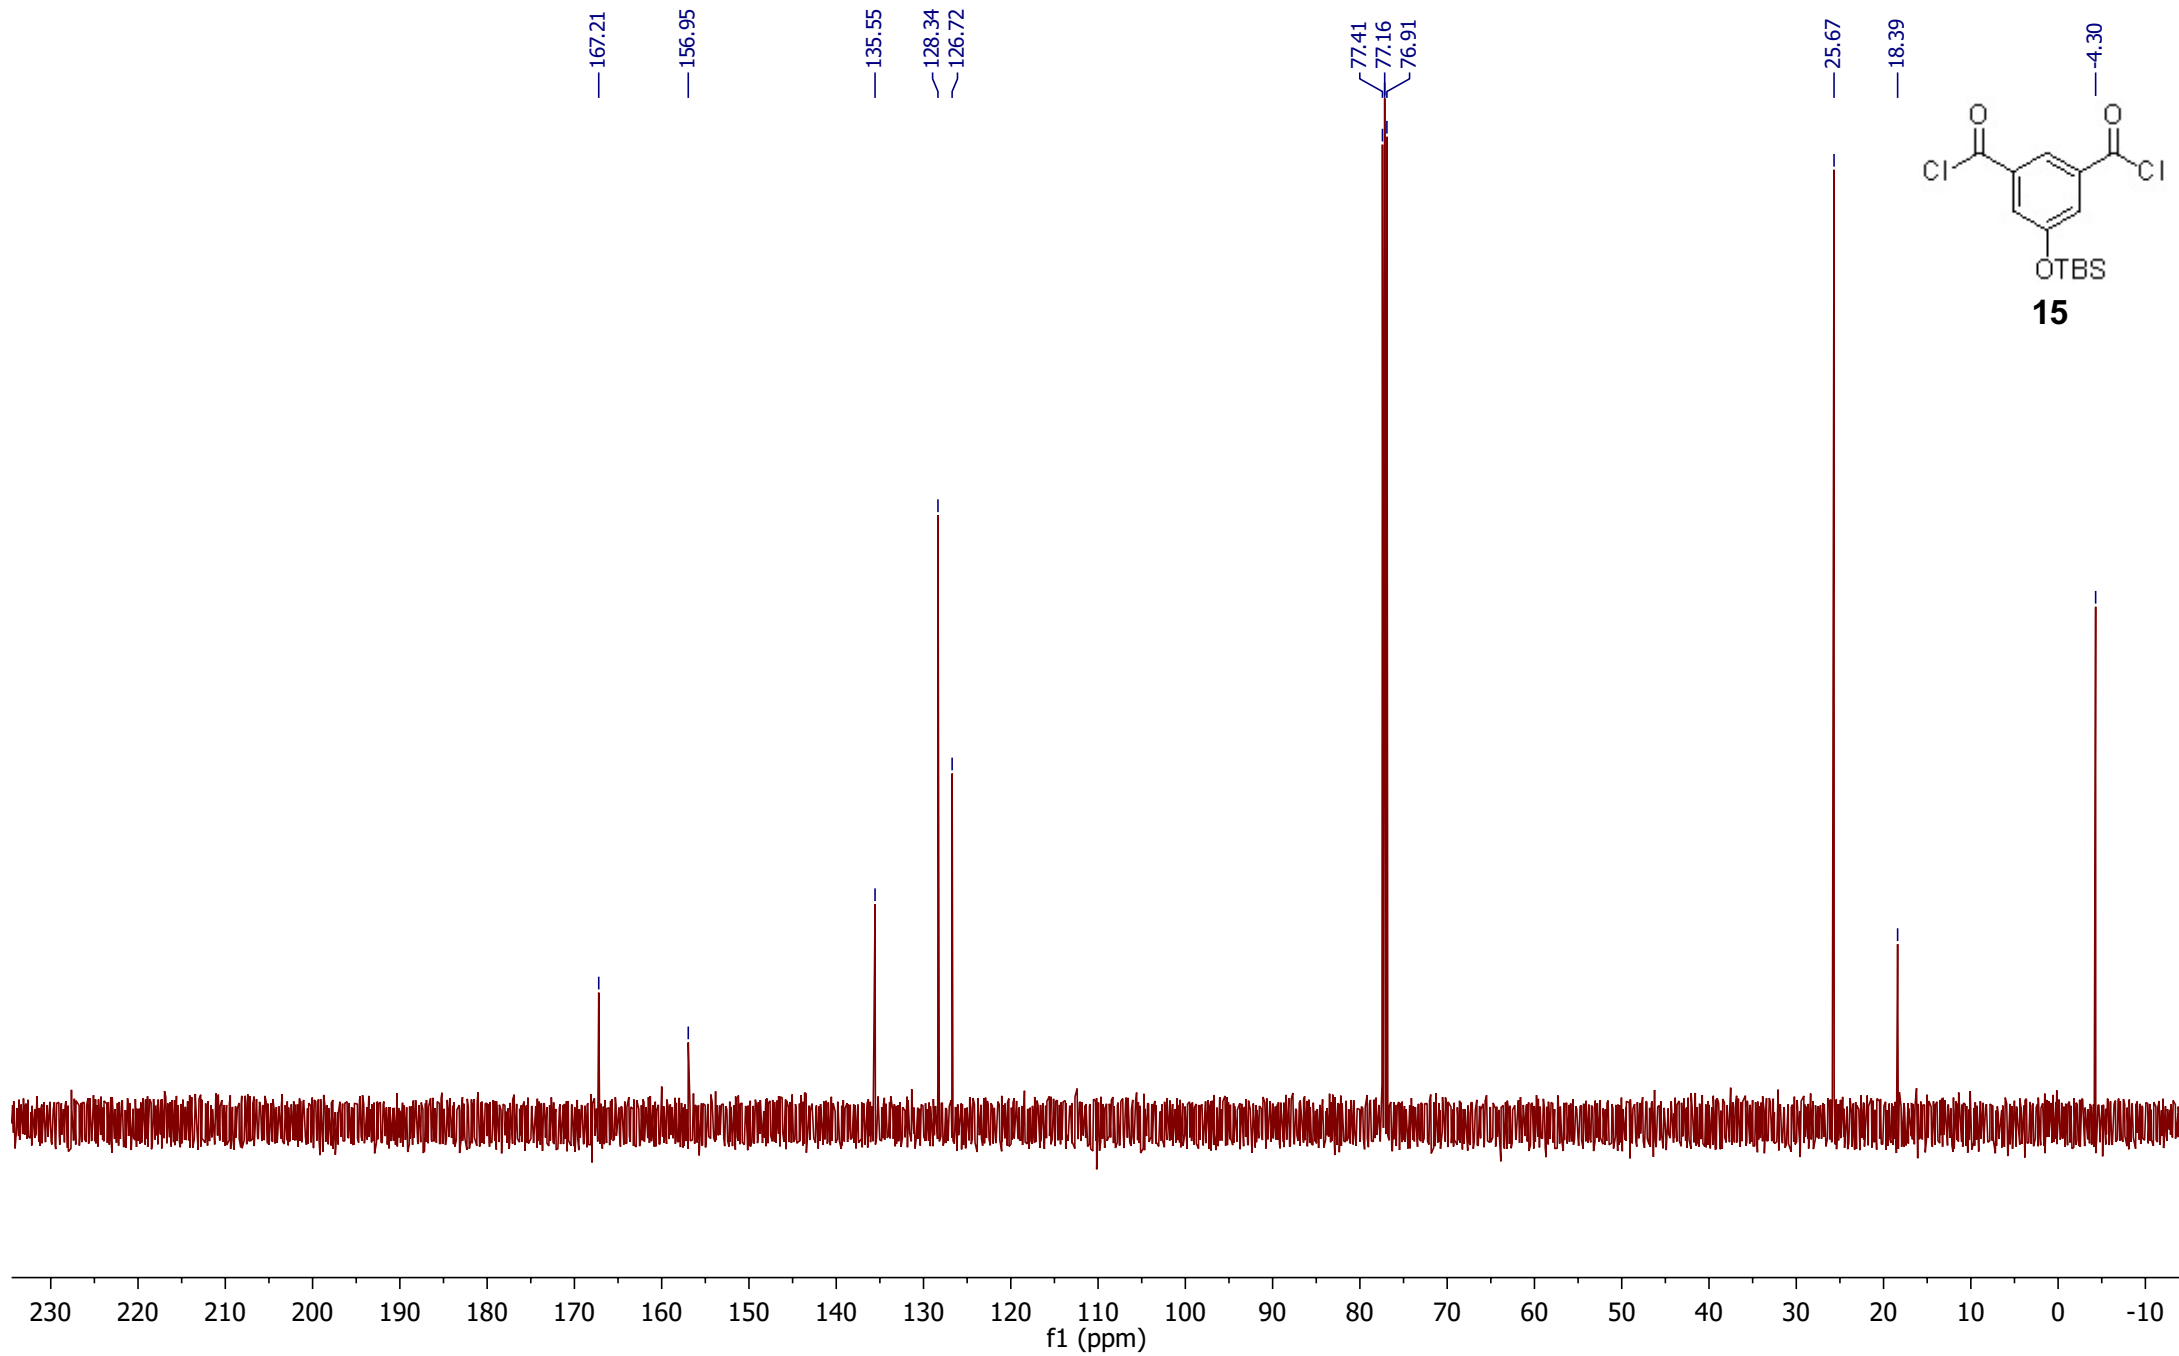

<sup>1</sup>H NMR (500 MHz, CDCl<sub>3</sub>) of Compound **16**

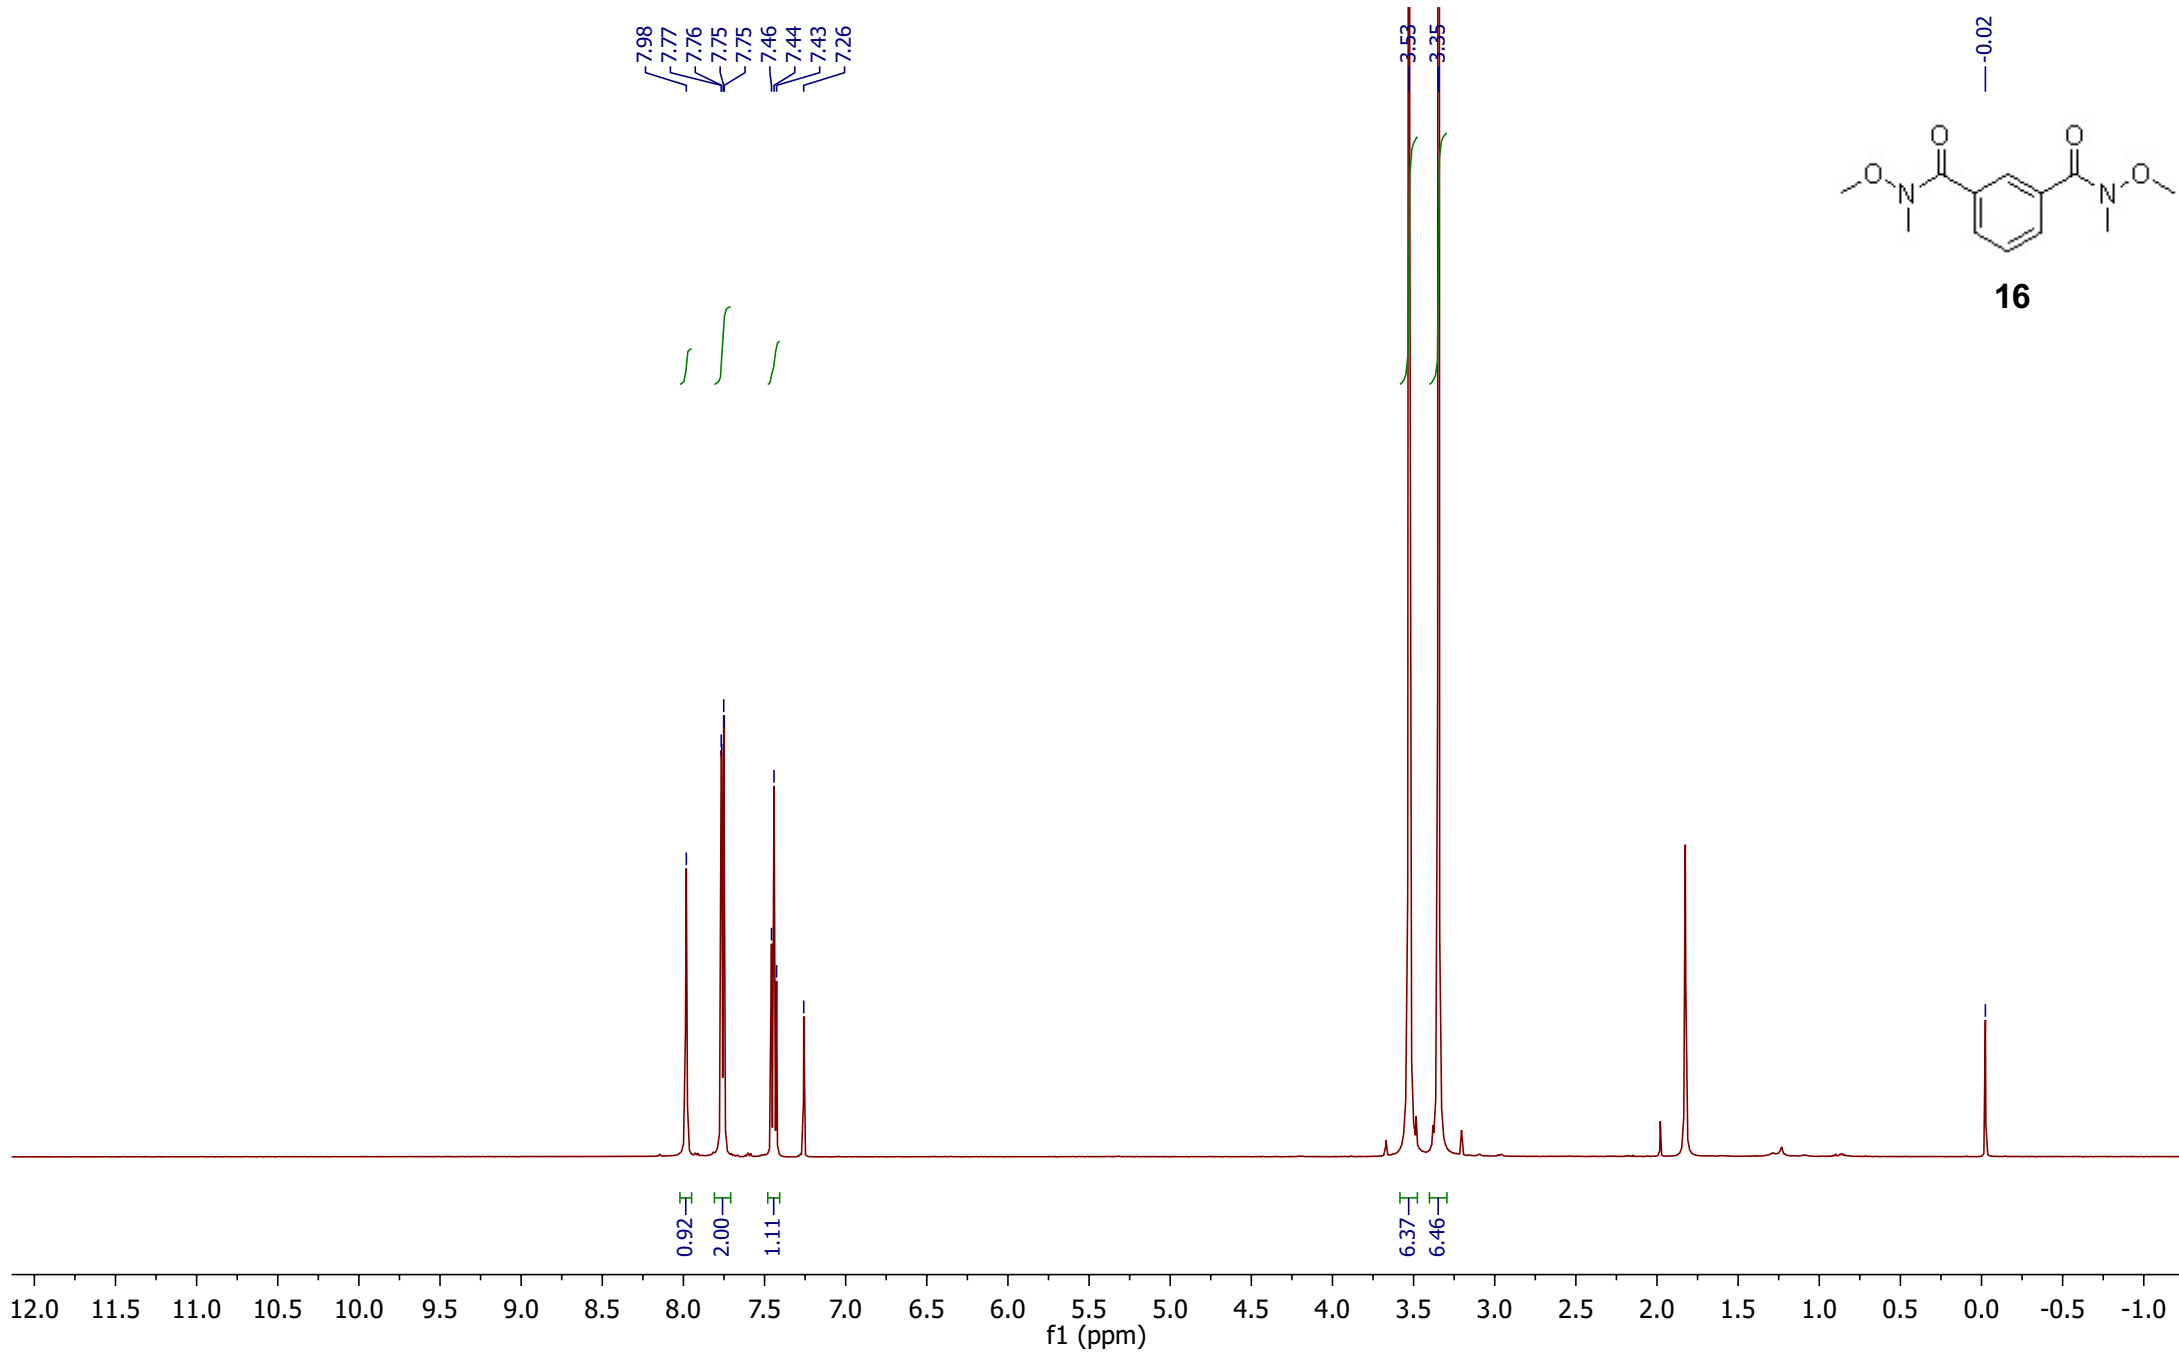

$^{13}\text{C}$  NMR (125 MHz,  $\text{CDCl}_3$ ) of Compound **16**

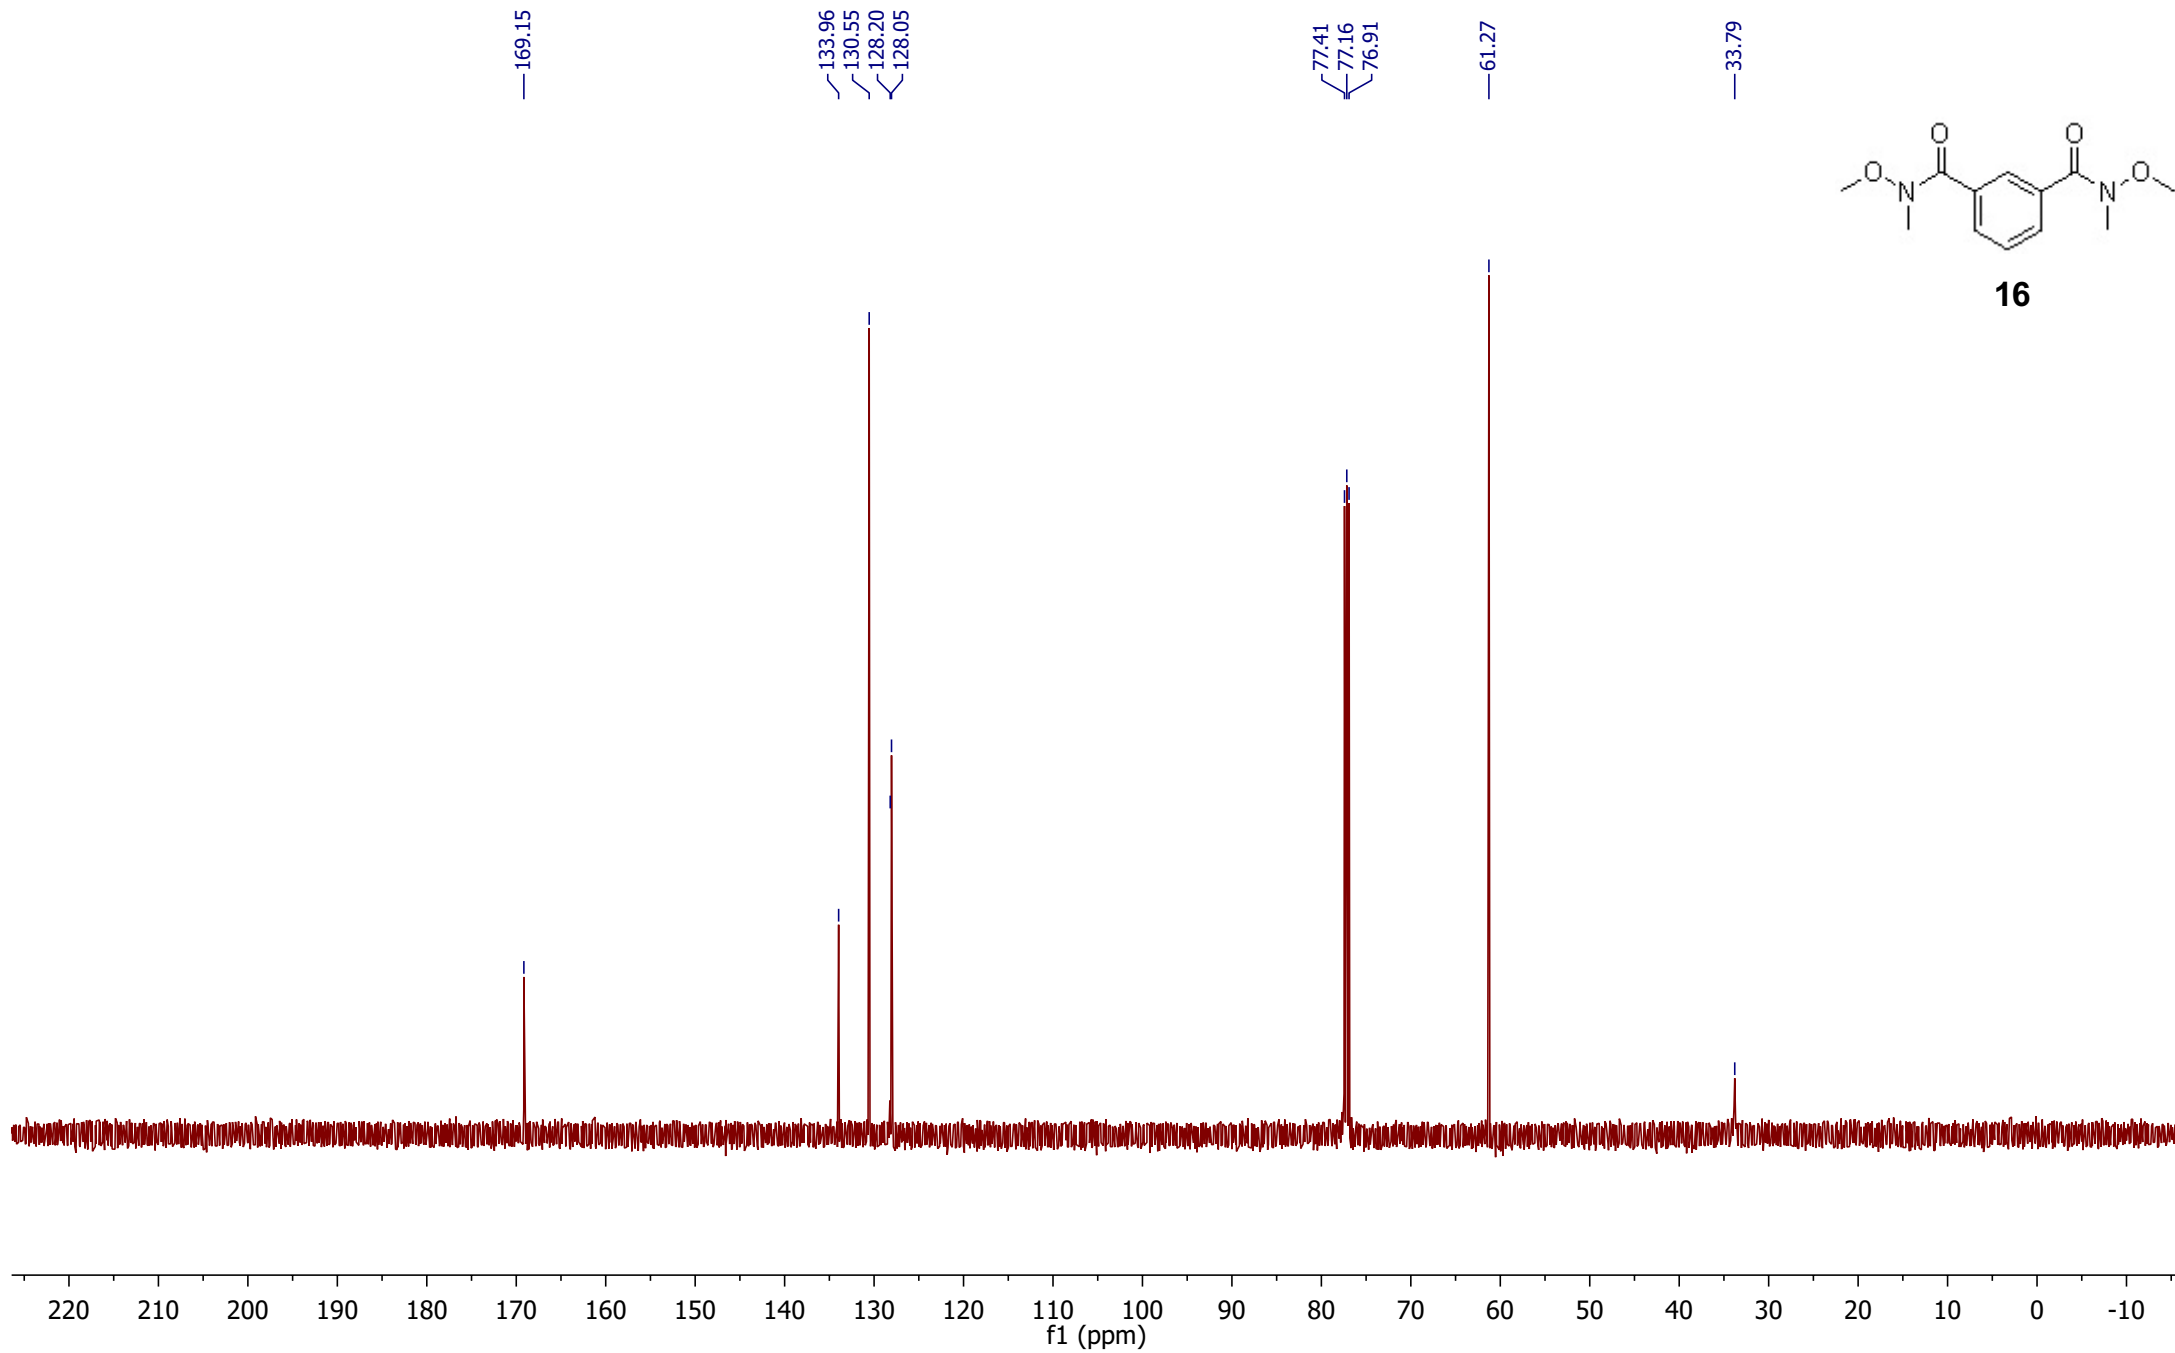

# HRMS (ESI) for Compound 16

C:\Xcalibur\..Erica\12-19-14\ENP\_I\_67

12/19/2014 11:41:31 AM

ENP\_I\_67 #48-64 RT: 0.96-1.12 AV: 17 NL: 1.60E8  
T: FTMS + p ESI Full ms [100.00-700.00]

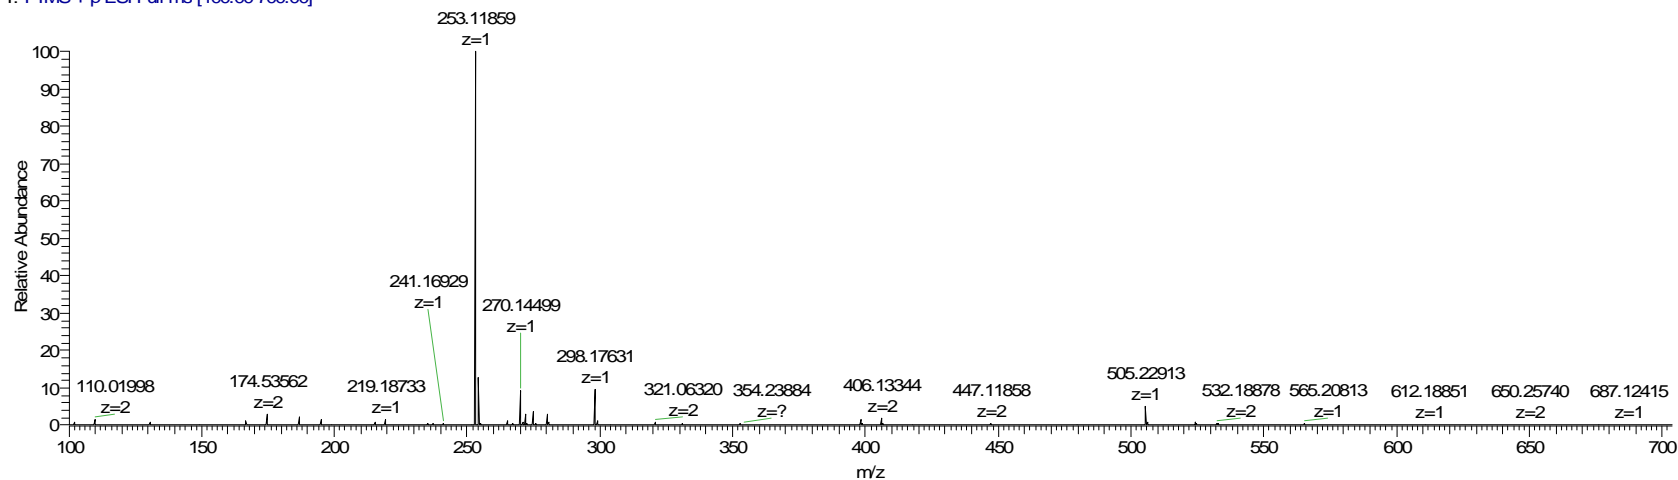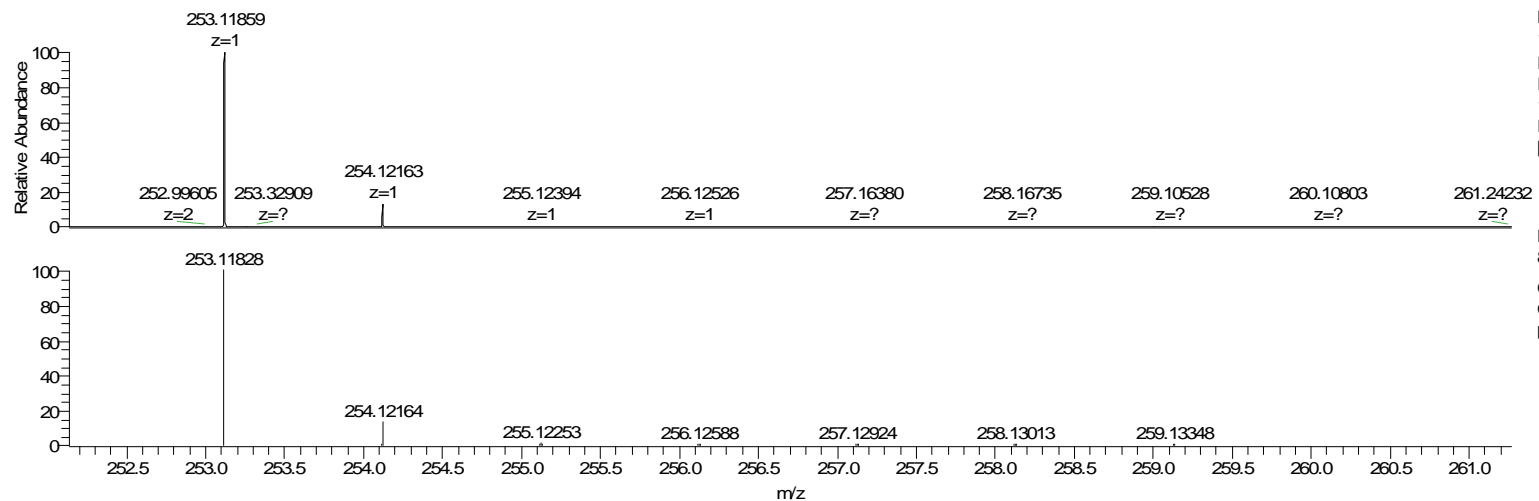

NL:  
1.60E8  
ENP\_I\_67#48-64  
RT: 0.96-1.12 AV:  
17 T: FTMS + p ESI  
Full ms  
[100.00-700.00]

NL:  
8.62E5  
C2H6N2O4+H  
C2H7N2O4  
pa Chrg 1

<sup>1</sup>H NMR (500 MHz, DMSO-d<sub>6</sub>) for Compound **17**

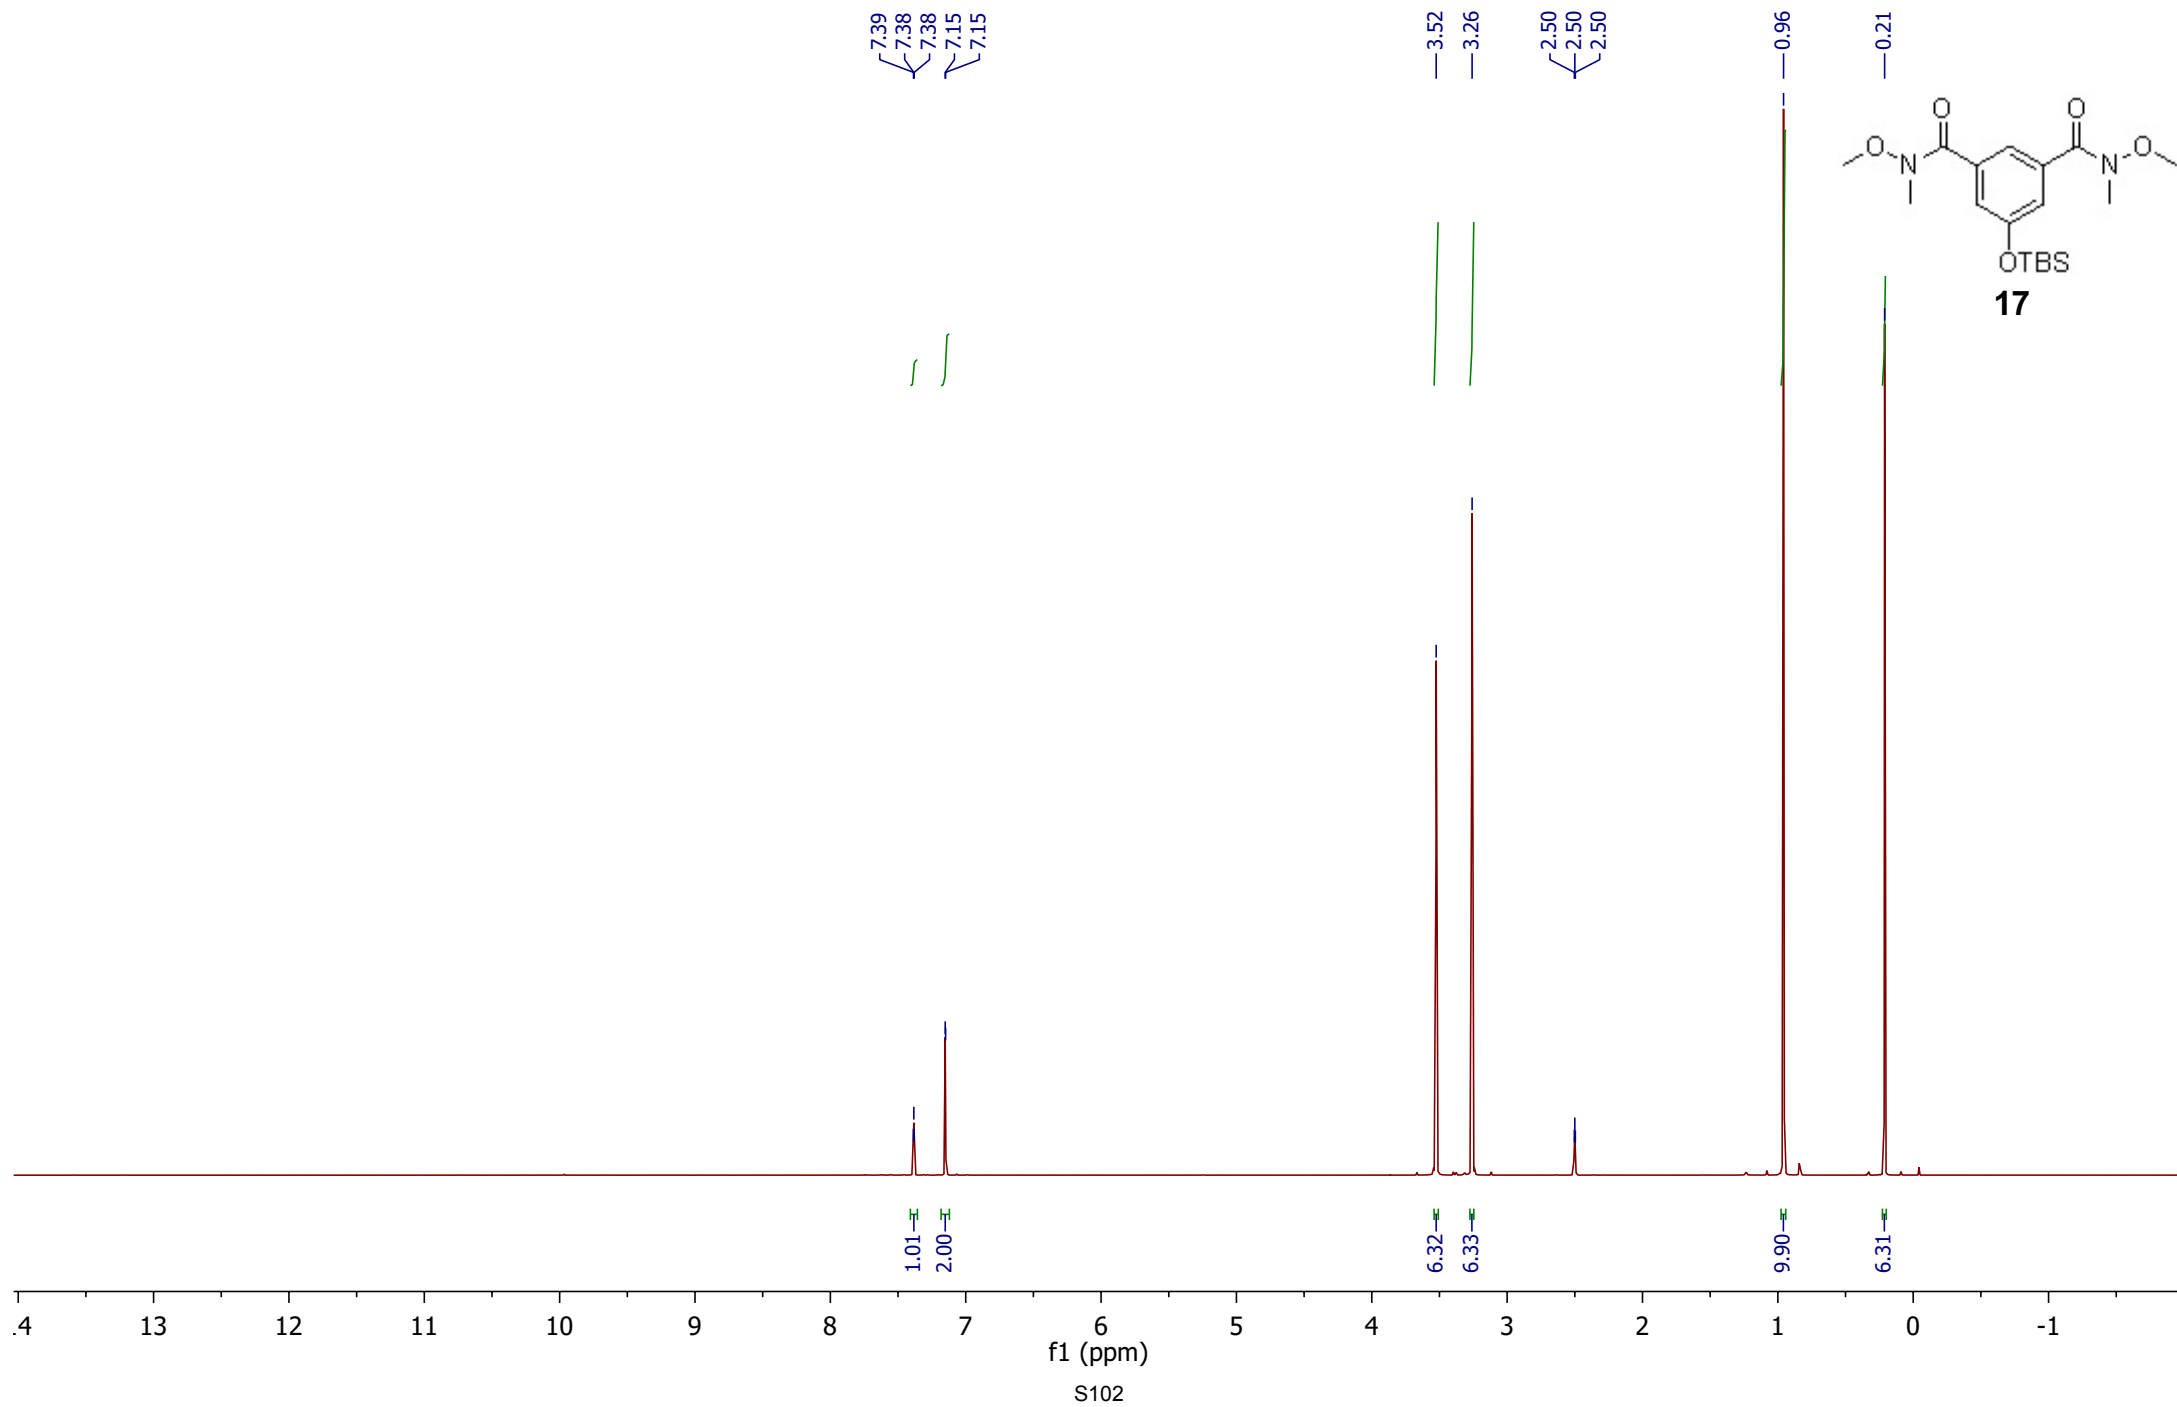

<sup>13</sup>C NMR (125 MHz, DMSO-d<sub>6</sub>) for Compound **17**

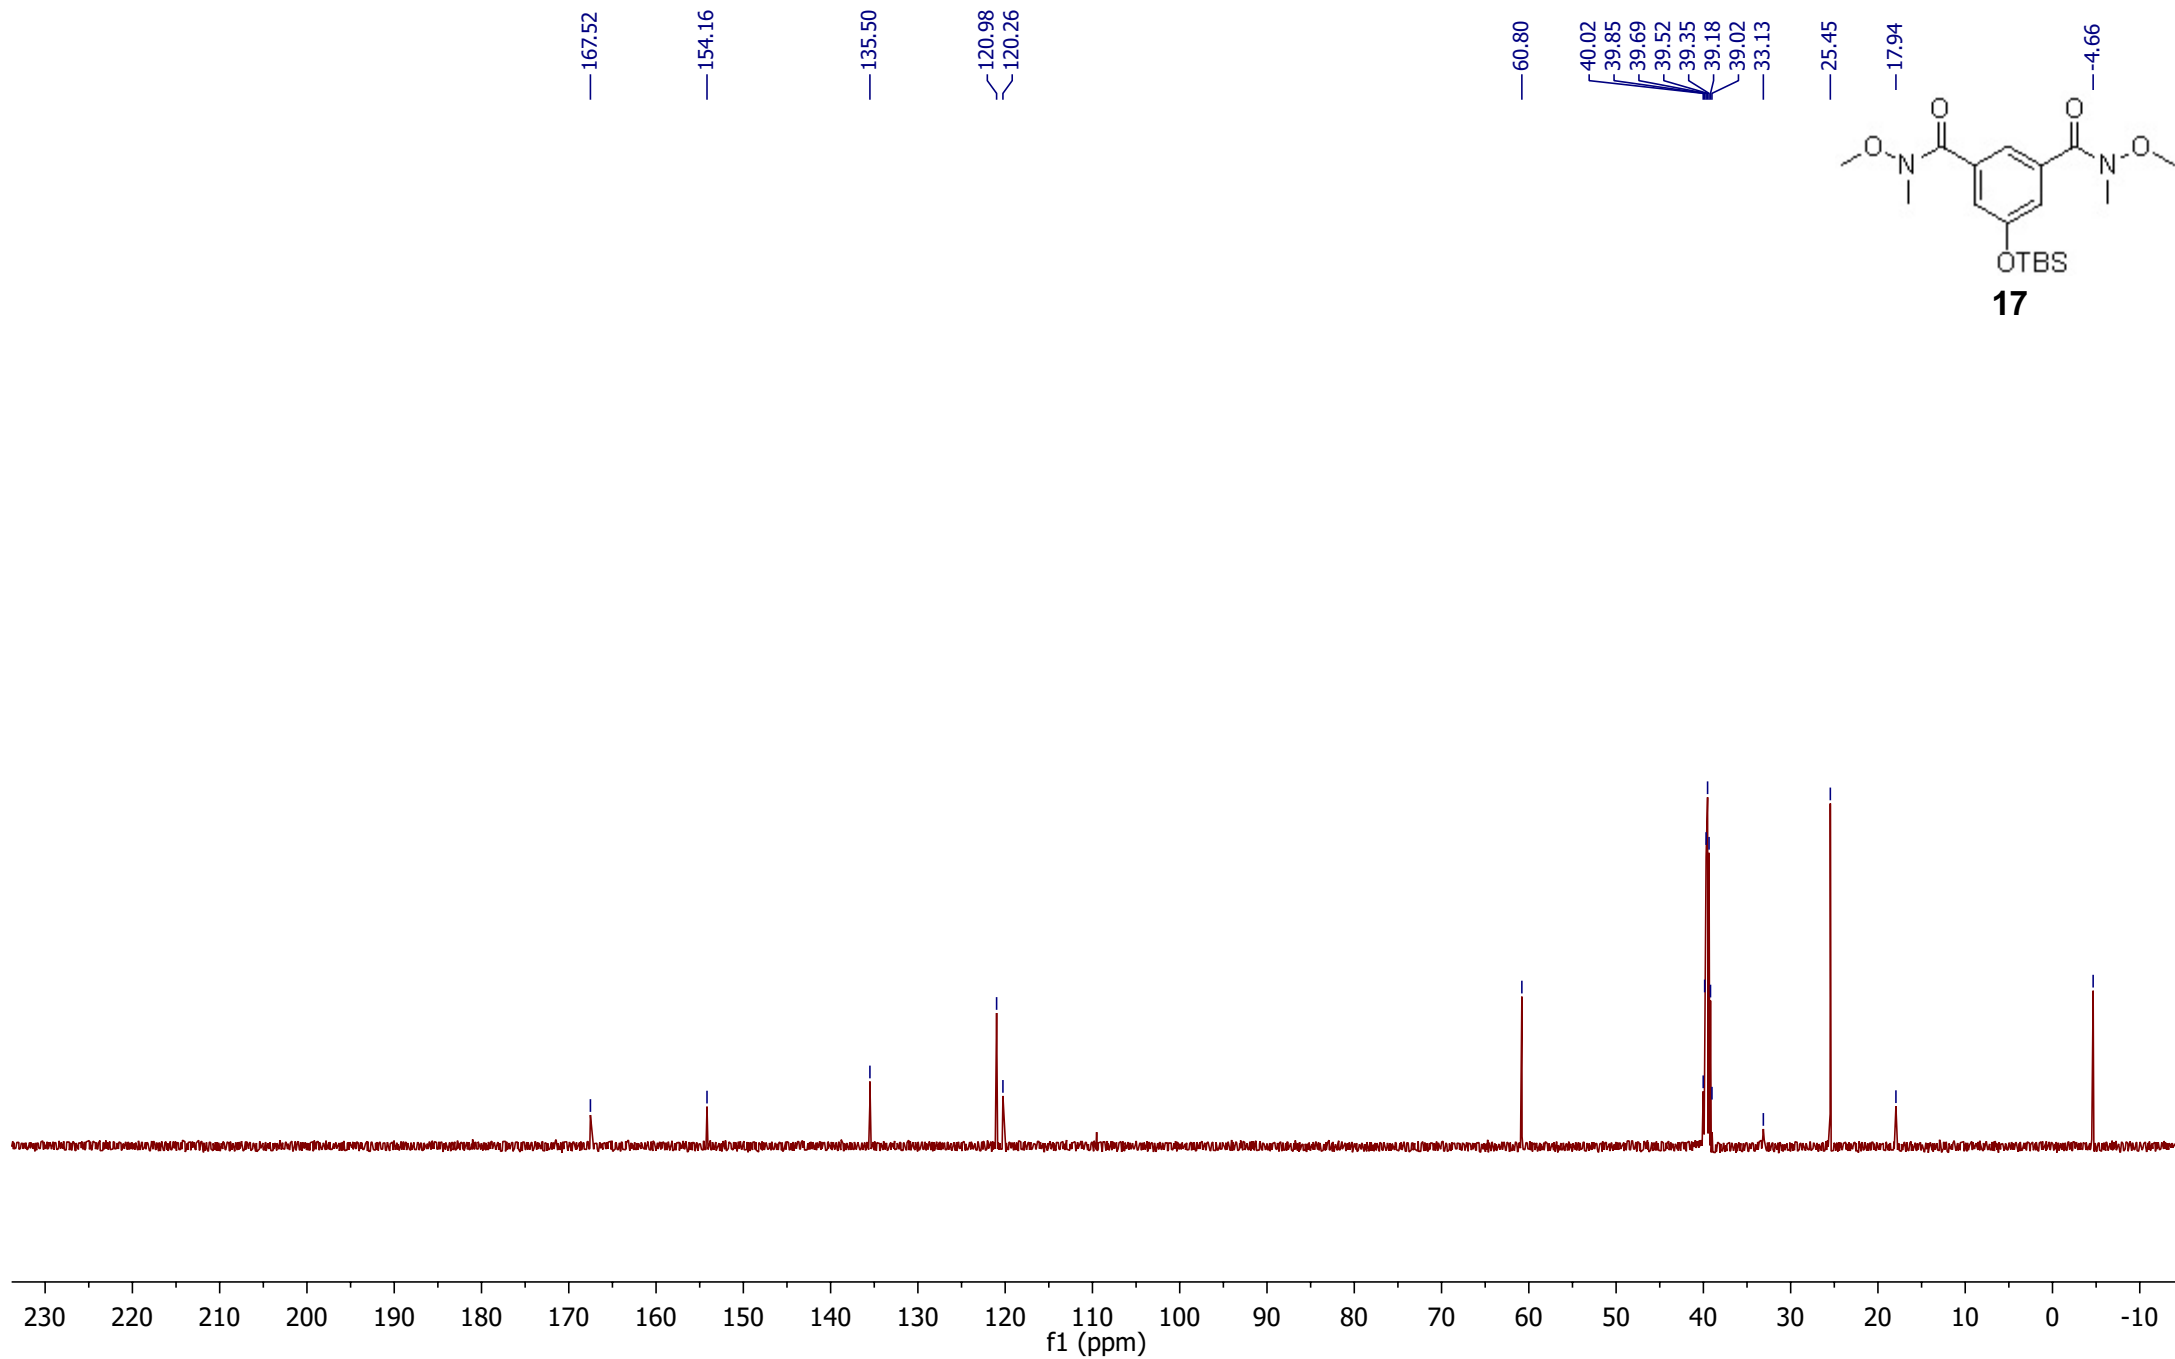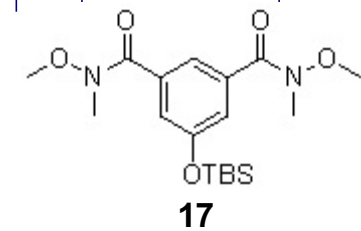

# HRMS (ESI) for Compound 17

C:\Xcalibur...\Erica\12-19-14\ENP\_V\_30

12/19/2014 12:13:25 PM

ENP\_V\_30 #186 RT: 2.13 AV: 1 NL: 3.94E8

T: FTMS + p ESI Full ms [100.00-700.00]

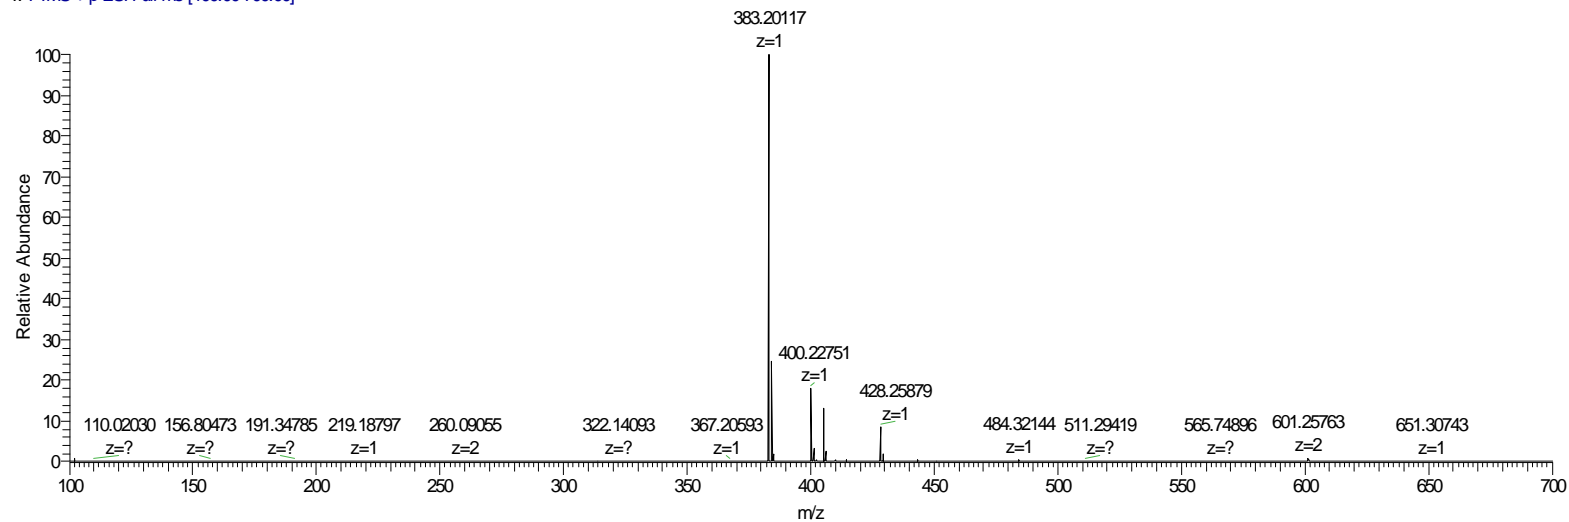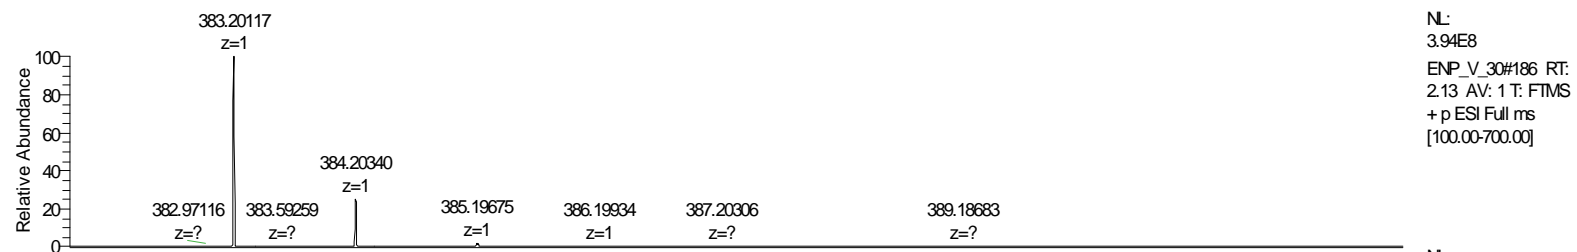

NL:  
3.94E8  
ENP\_V\_30#186 RT:  
2.13 AV: 1 T: FTMS  
+ p ESI Full ms  
[100.00-700.00]

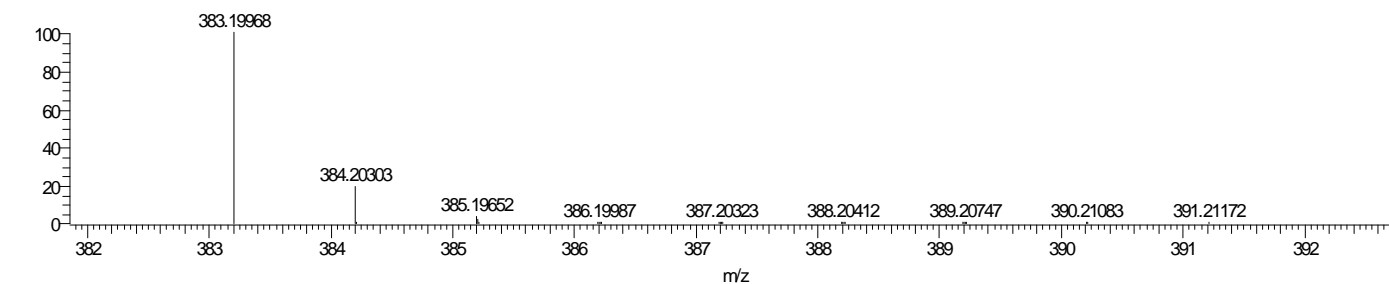

NL:  
7.43E5  
C<sub>8</sub>H<sub>30</sub>N<sub>2</sub>O<sub>5</sub>Si +H  
C<sub>8</sub>H<sub>31</sub>N<sub>2</sub>O<sub>5</sub>Si<sub>1</sub>  
pa Chrg 1



<sup>1</sup>H NMR (500 MHz, CDCl<sub>3</sub>) of Compound **18**

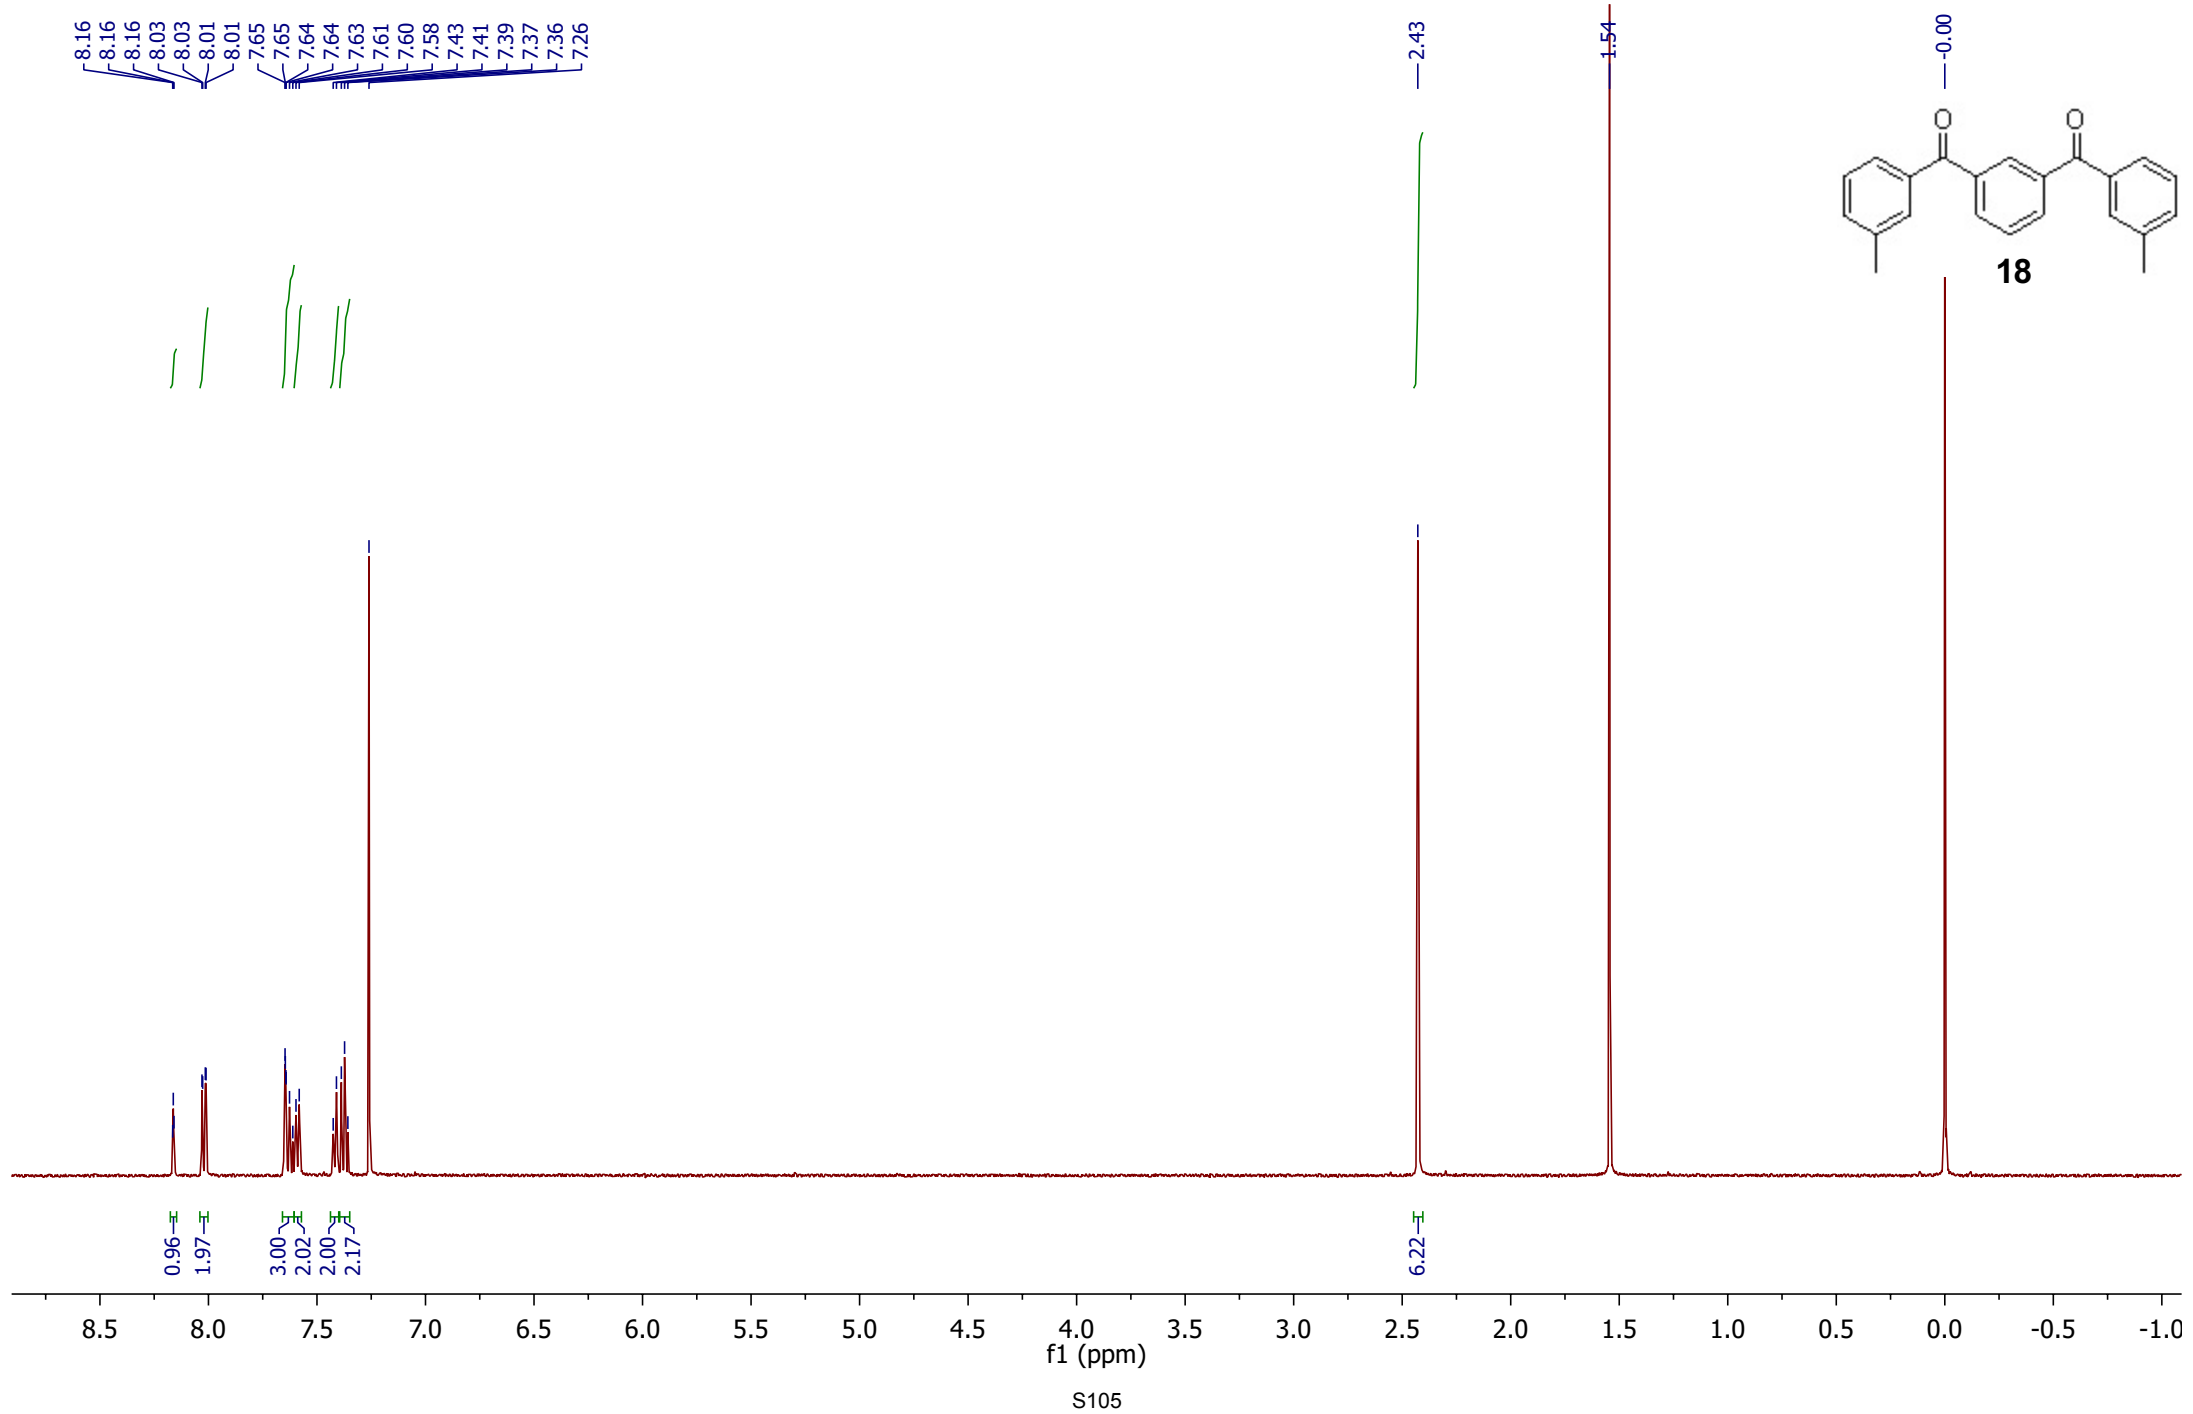

$^{13}\text{C}$  NMR (125 MHz,  $\text{CDCl}_3$ ) of Compound **18**

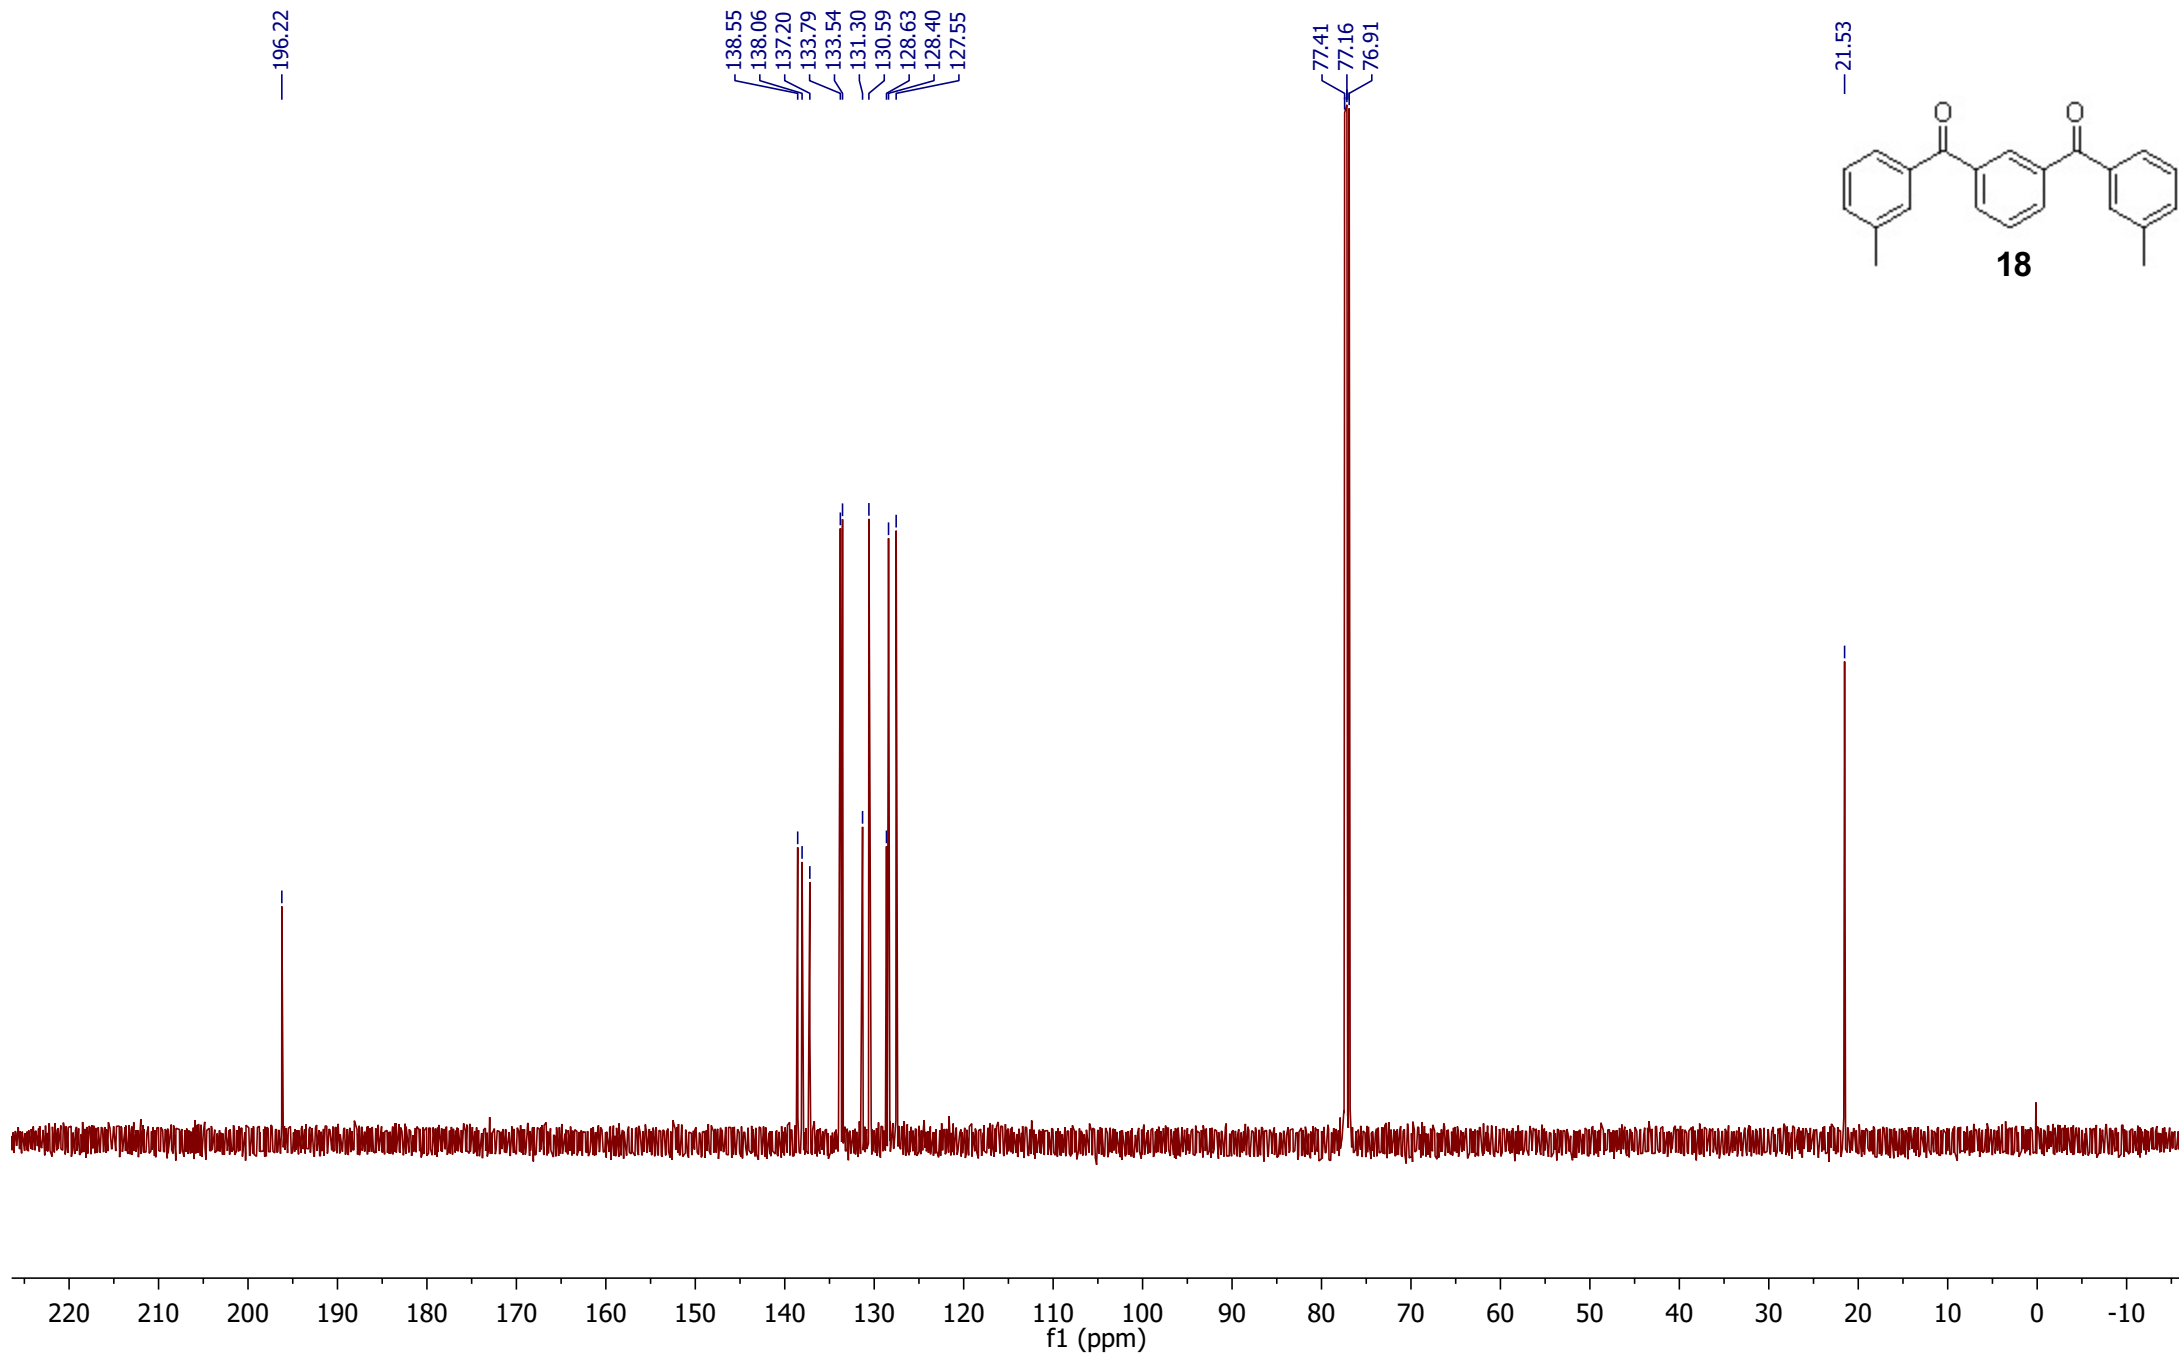

# HRMS (ESI) for Compound 18

C:\Xcalibur\..Erica\12-19-14\ENP\_I\_75

12/19/2014 11:30:55 AM

ENP\_I\_75 #270-287 RT: 2.81-2.95 AV: 18 NL: 4.75E7  
T: FTMS + p ESI Full ms [100.00-700.00]

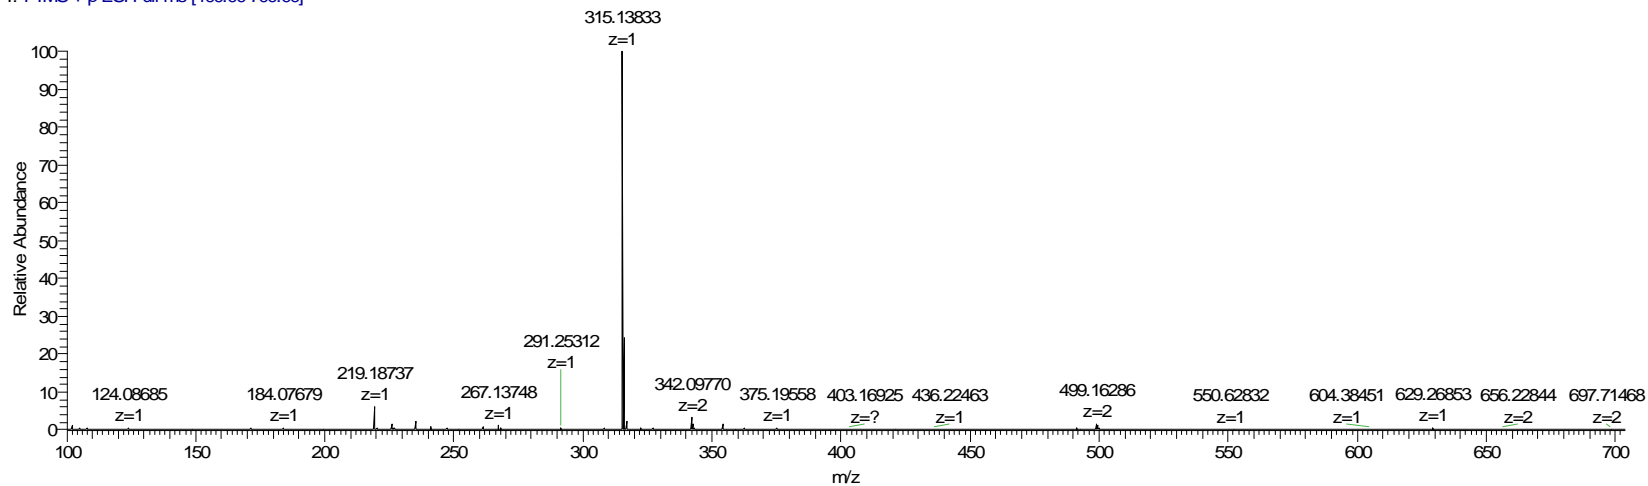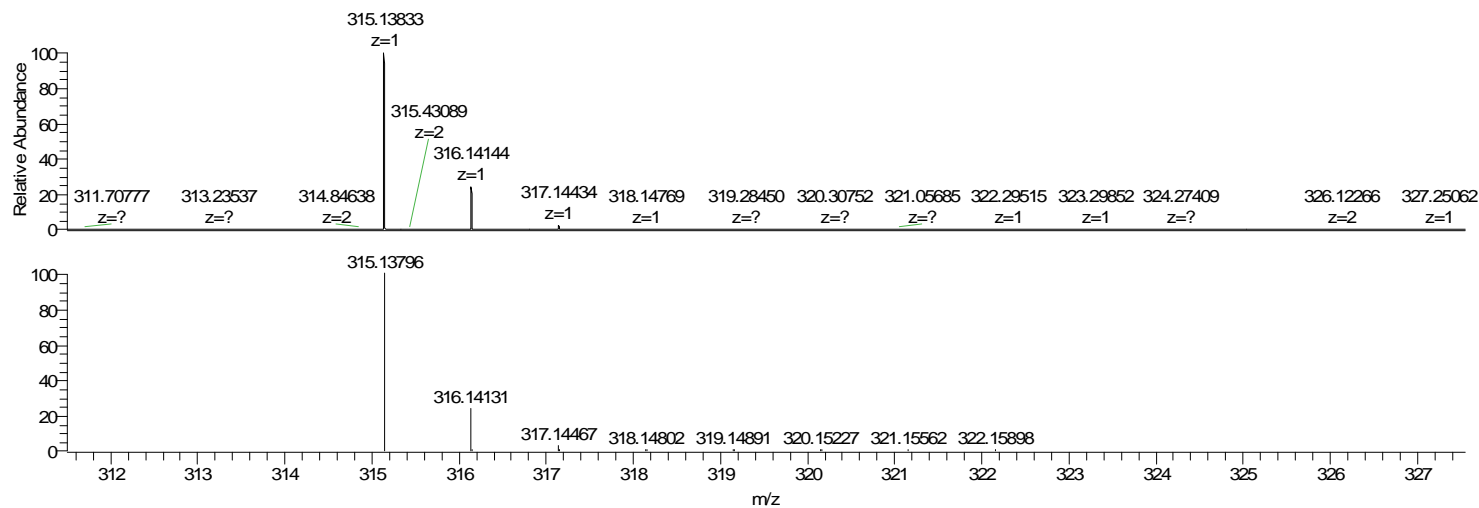

NL:  
4.75E7  
ENP\_I\_75#270-287  
RT: 2.81-2.95 AV:  
18 T: FTMS + p ESI  
Full ms  
[100.00-700.00]

NL:  
7.84E5  
C22H8O2+H  
C22H8O2  
pa Chrg 1

1H NMR (500 MHz, CDCl3) of Compound **19**

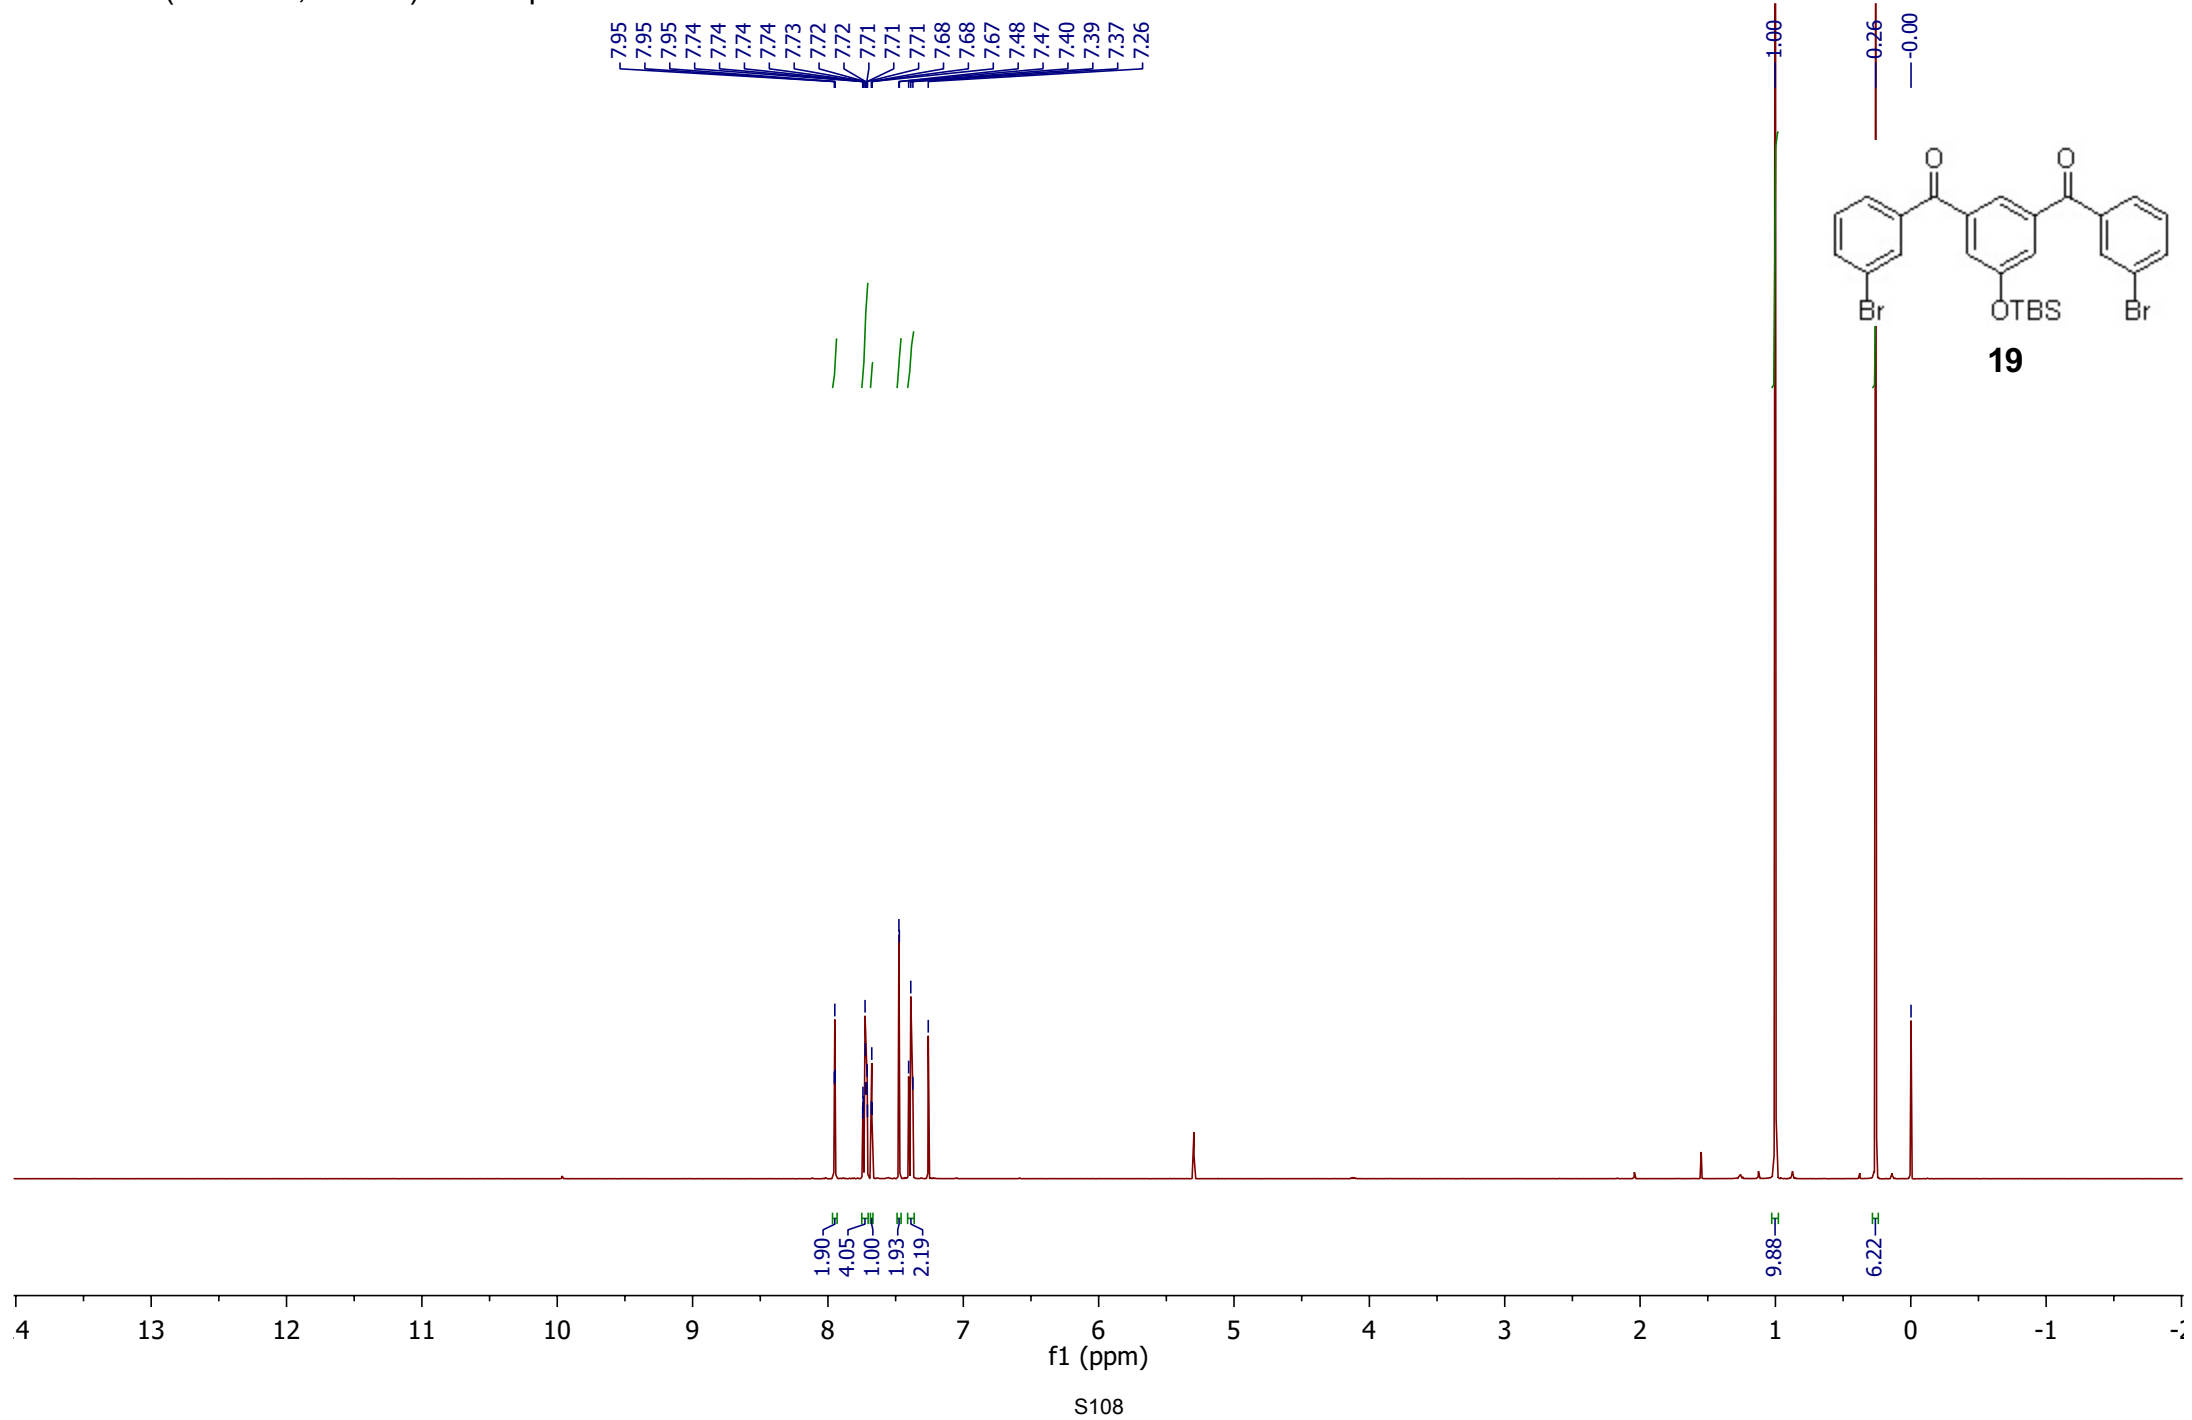

<sup>13</sup>C NMR (125 MHz, CDCl<sub>3</sub>) of Compound **19**

— 193.76

— 156.14

138.75  
138.57  
135.77  
132.76  
130.04  
128.50  
125.17  
124.18  
122.79

77.26  
77.01  
76.76

— 25.60

— 18.24

— 0.00

— -4.35

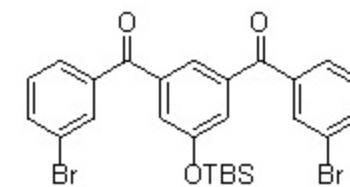

**19**

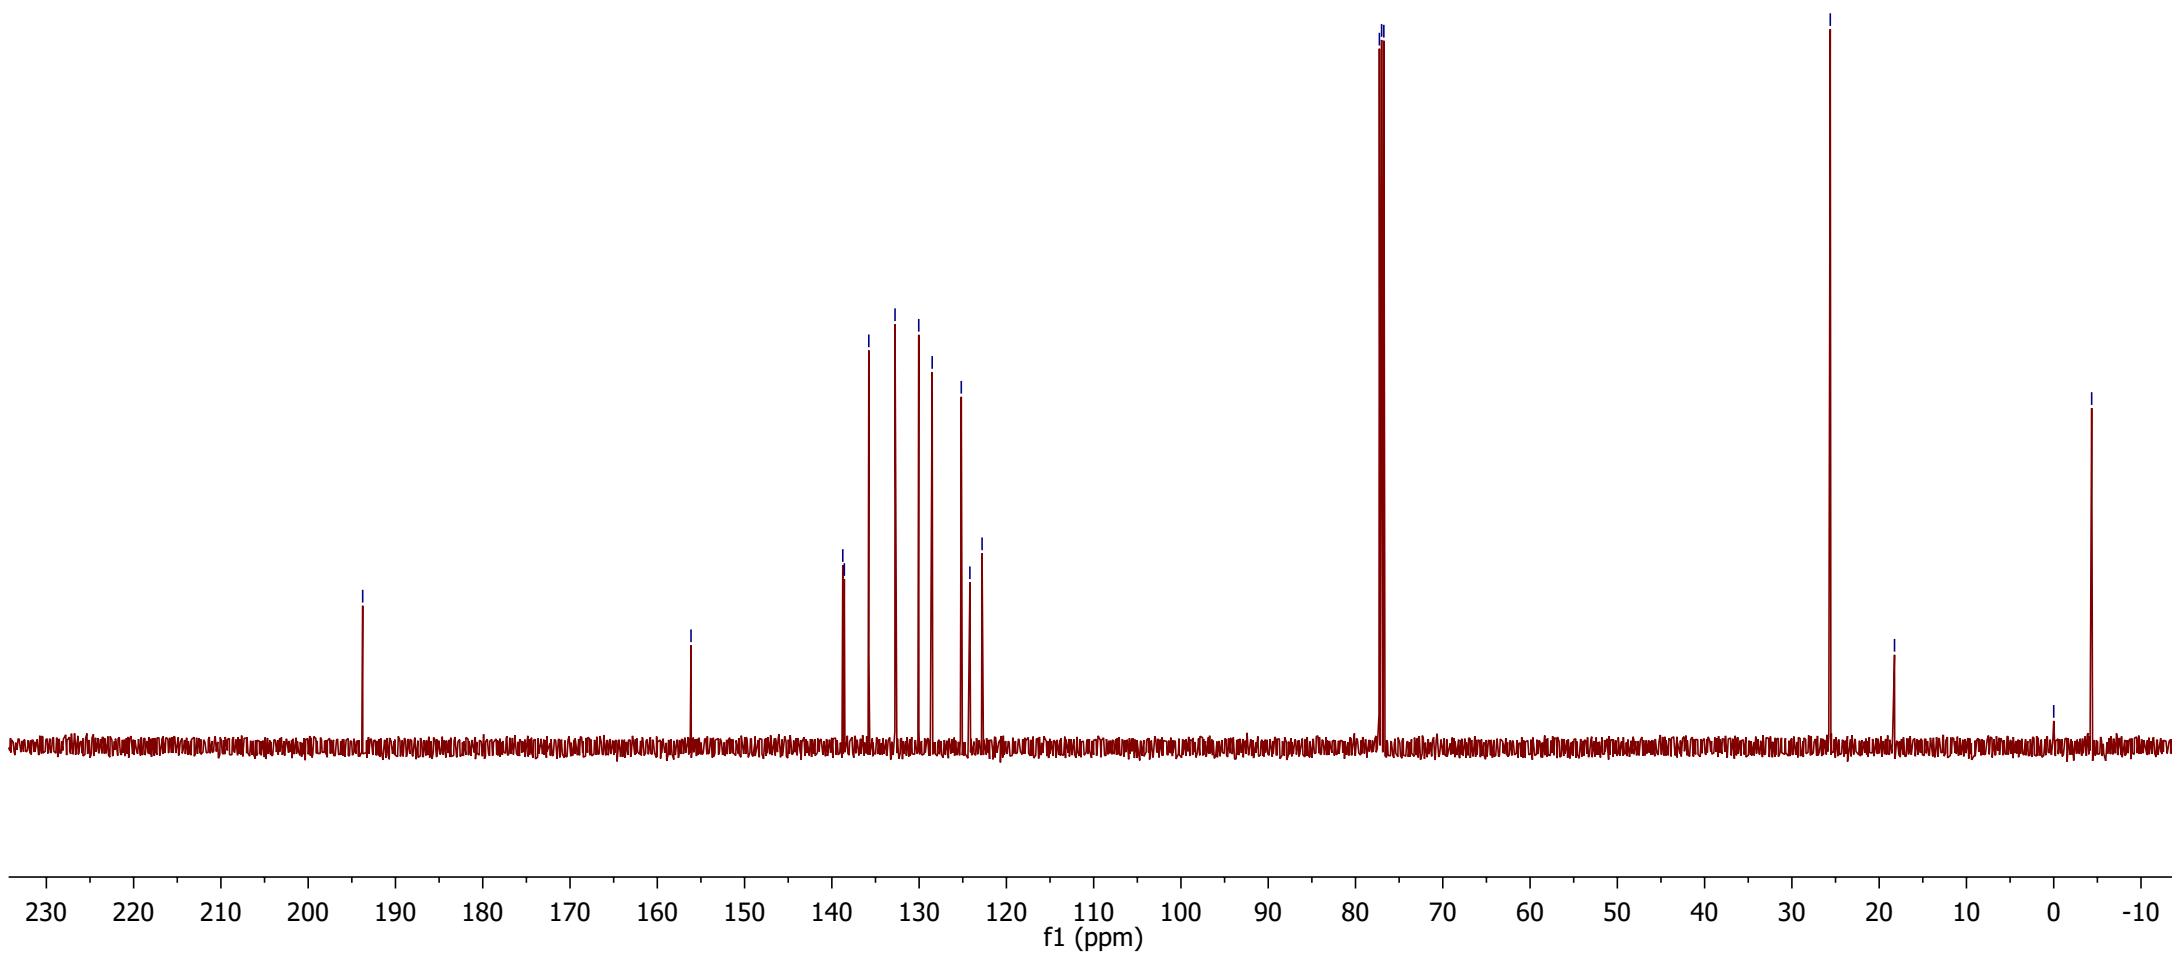

# HRMS (ESI) for Compound 19

C:\Xcalibur\...ENP\_V\_31\_Orbi\_+ESI

12/30/2014 7:53:49 PM

ENP\_V\_31\_Orbi\_+ESI #10 RT: 0.10 AV: 1 NL: 3.87E6  
T: FTMS + c ESI Full ms [150.00-1000.00]

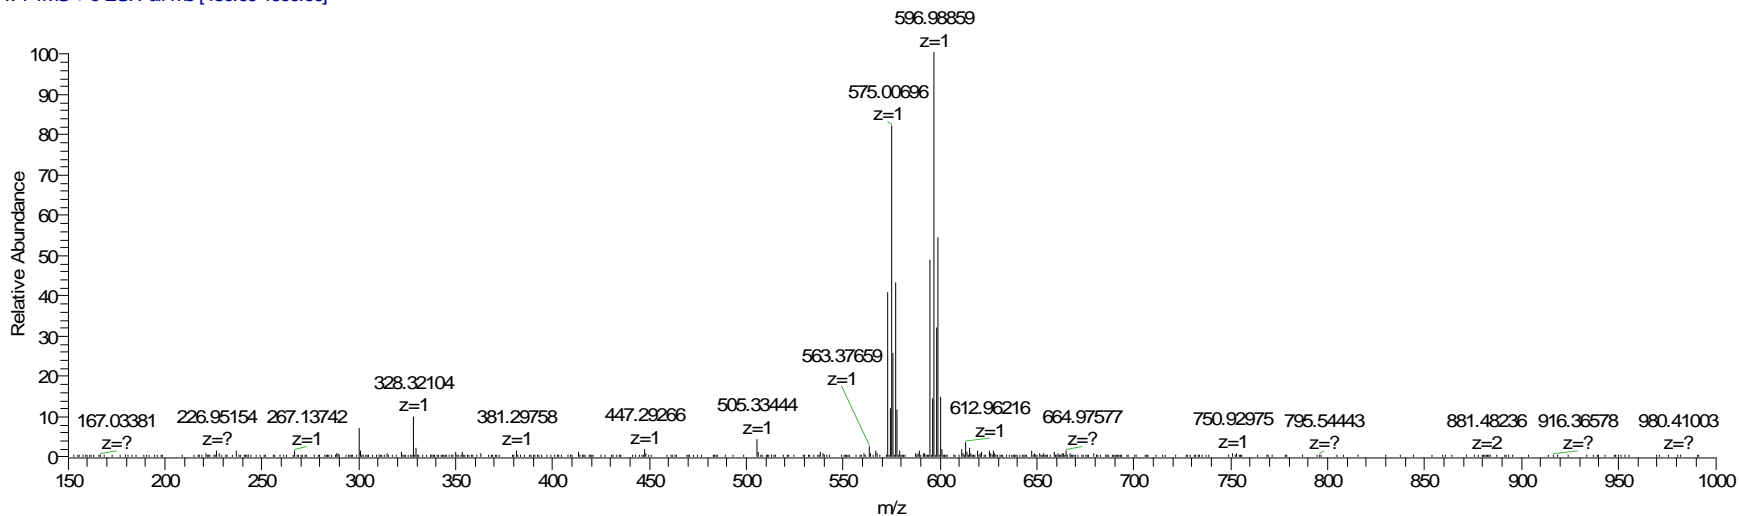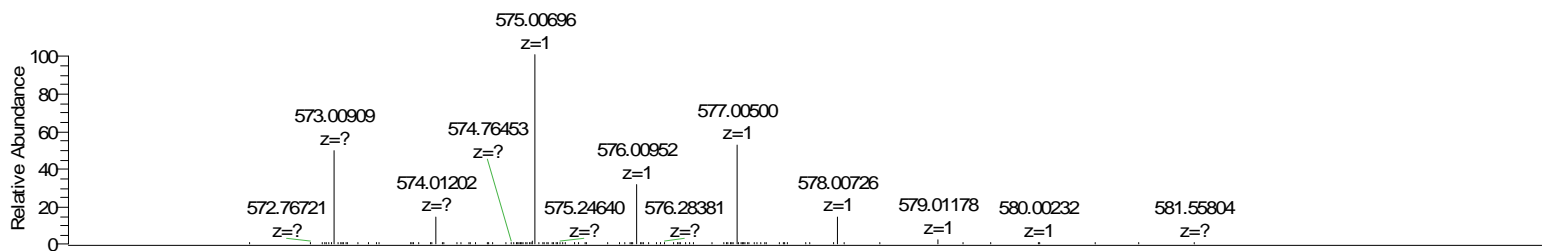

NL:  
3.18E6  
ENP\_V\_31\_Orbi\_+  
ESI#10 RT: 0.10  
AV: 1 T: FTMS + c  
ESI Full ms  
[150.00-1000.00]

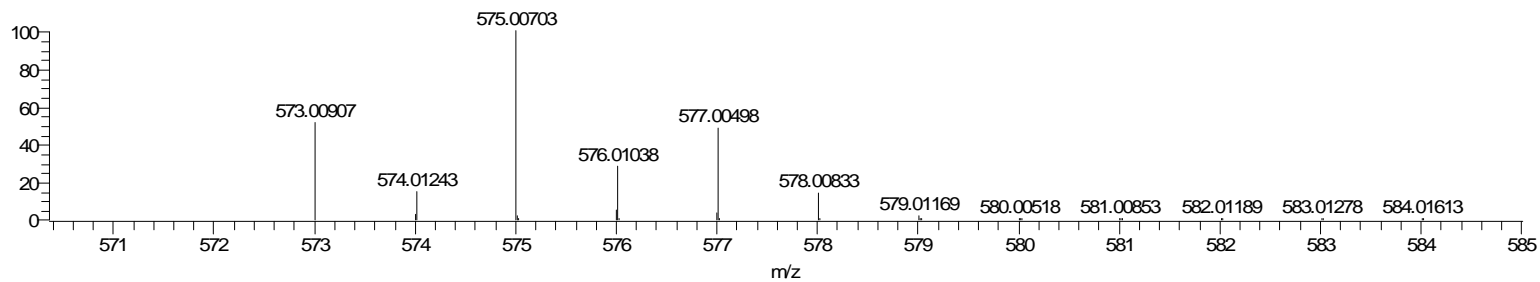

NL:  
3.45E5  
C<sub>26</sub>H<sub>26</sub>Br<sub>2</sub>O<sub>3</sub>Si +H  
C<sub>26</sub>H<sub>27</sub>Br<sub>2</sub>O<sub>3</sub>Si  
pa Chrg 1

<sup>1</sup>H NMR (500 MHz, DMSO-d<sub>6</sub>) of Compound **20**

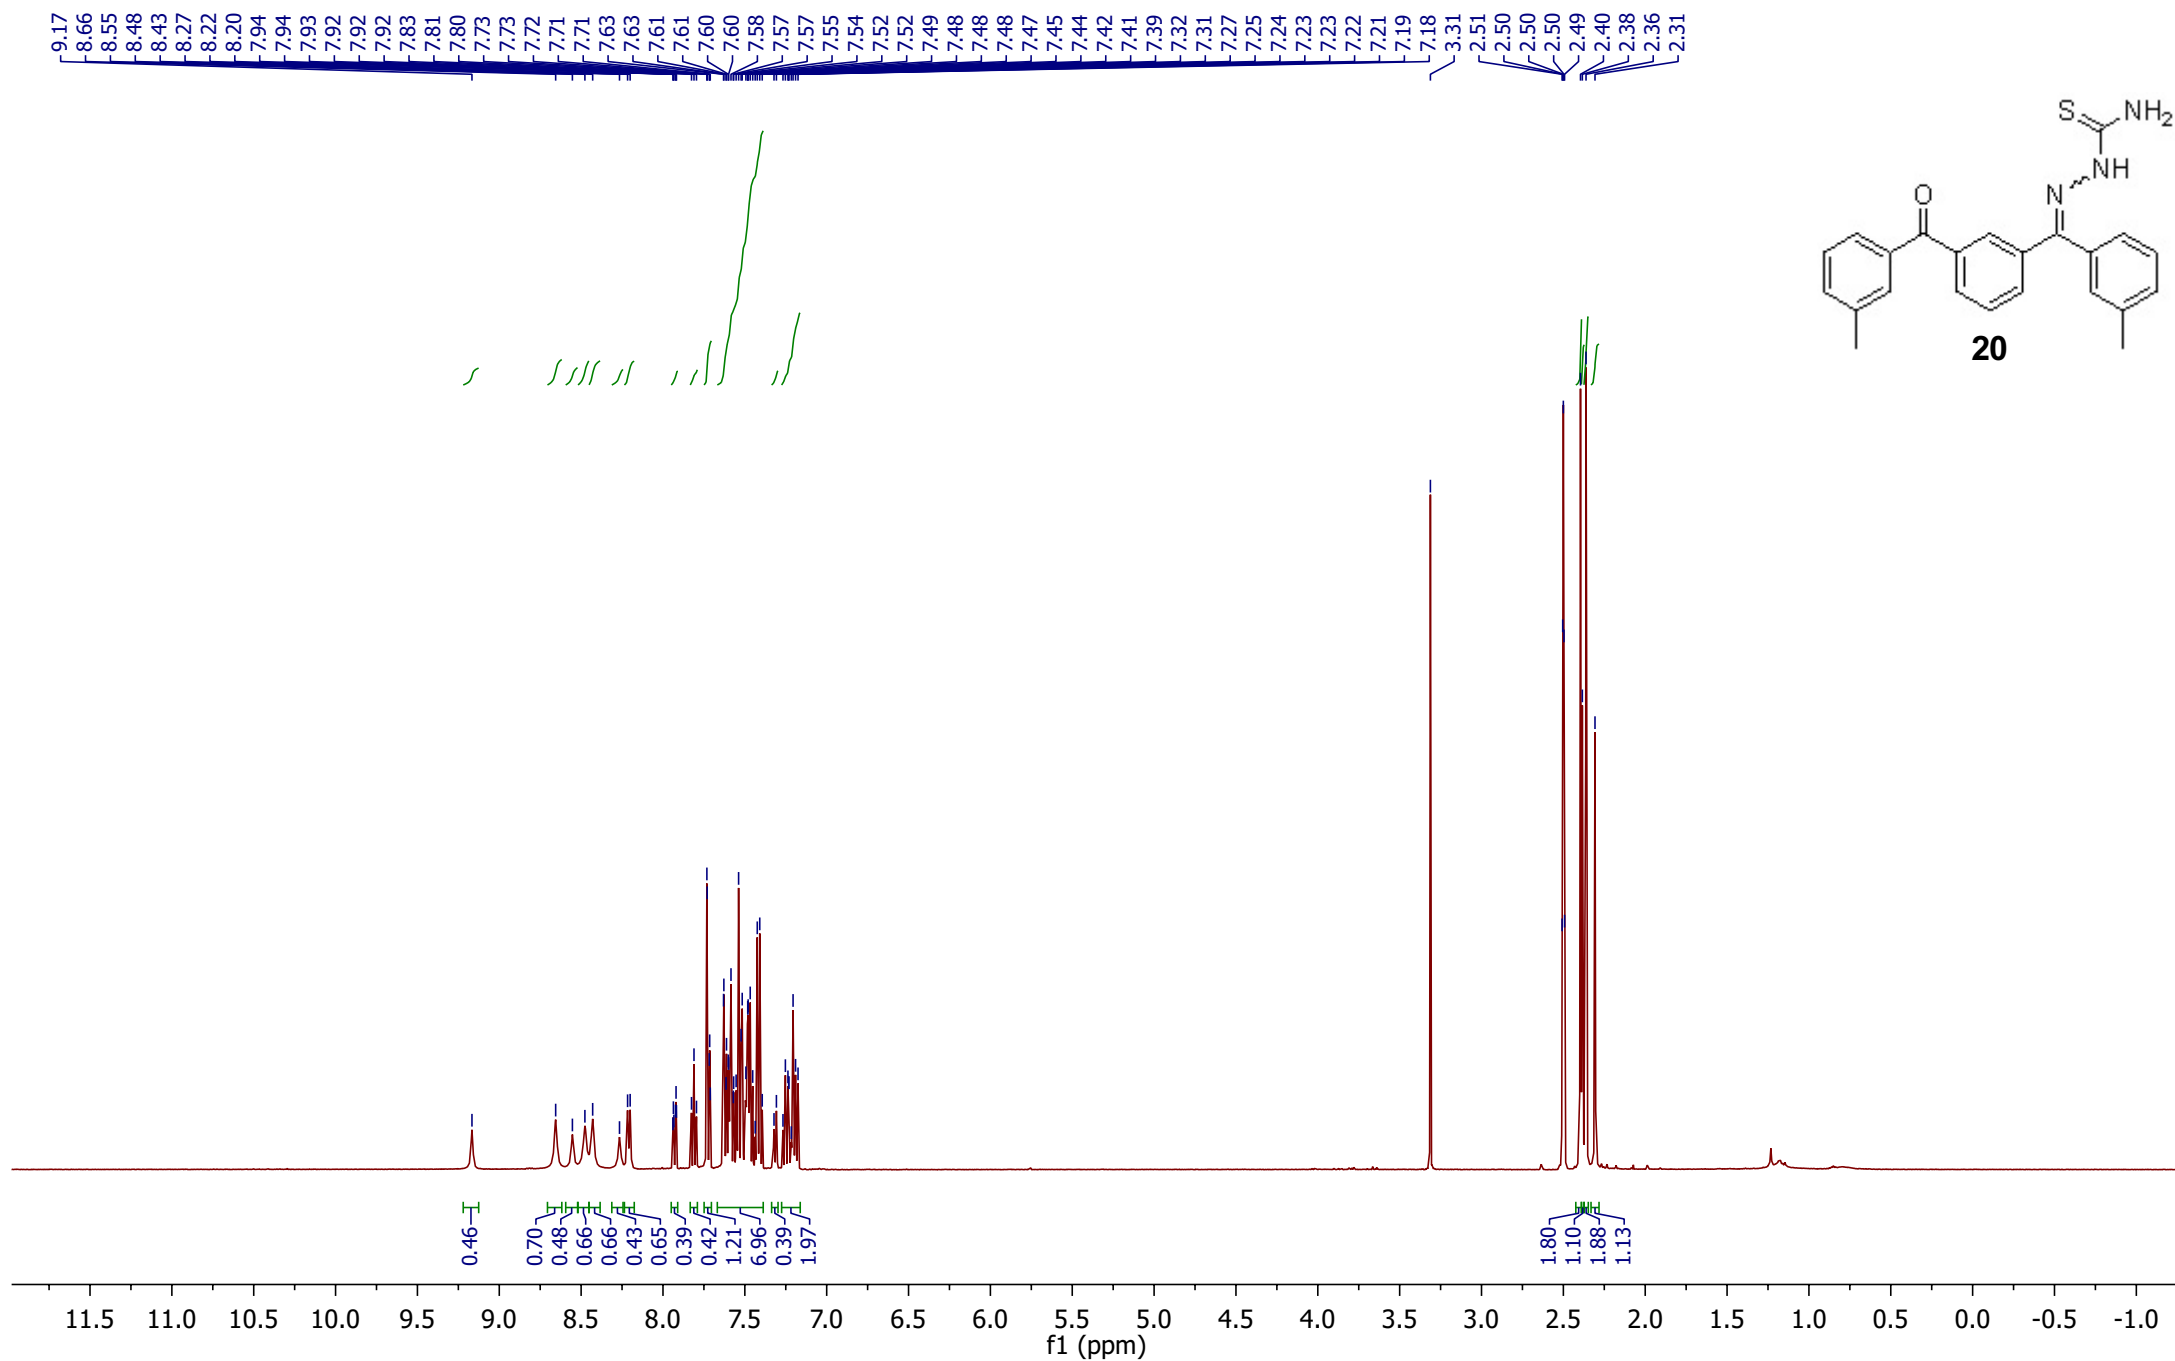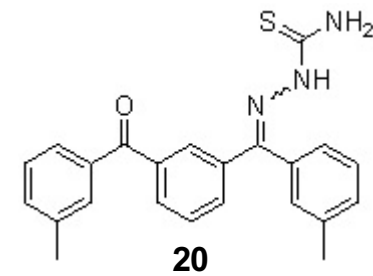

<sup>13</sup>C NMR (125 MHz, DMSO-d<sub>6</sub>) of Compound **20**

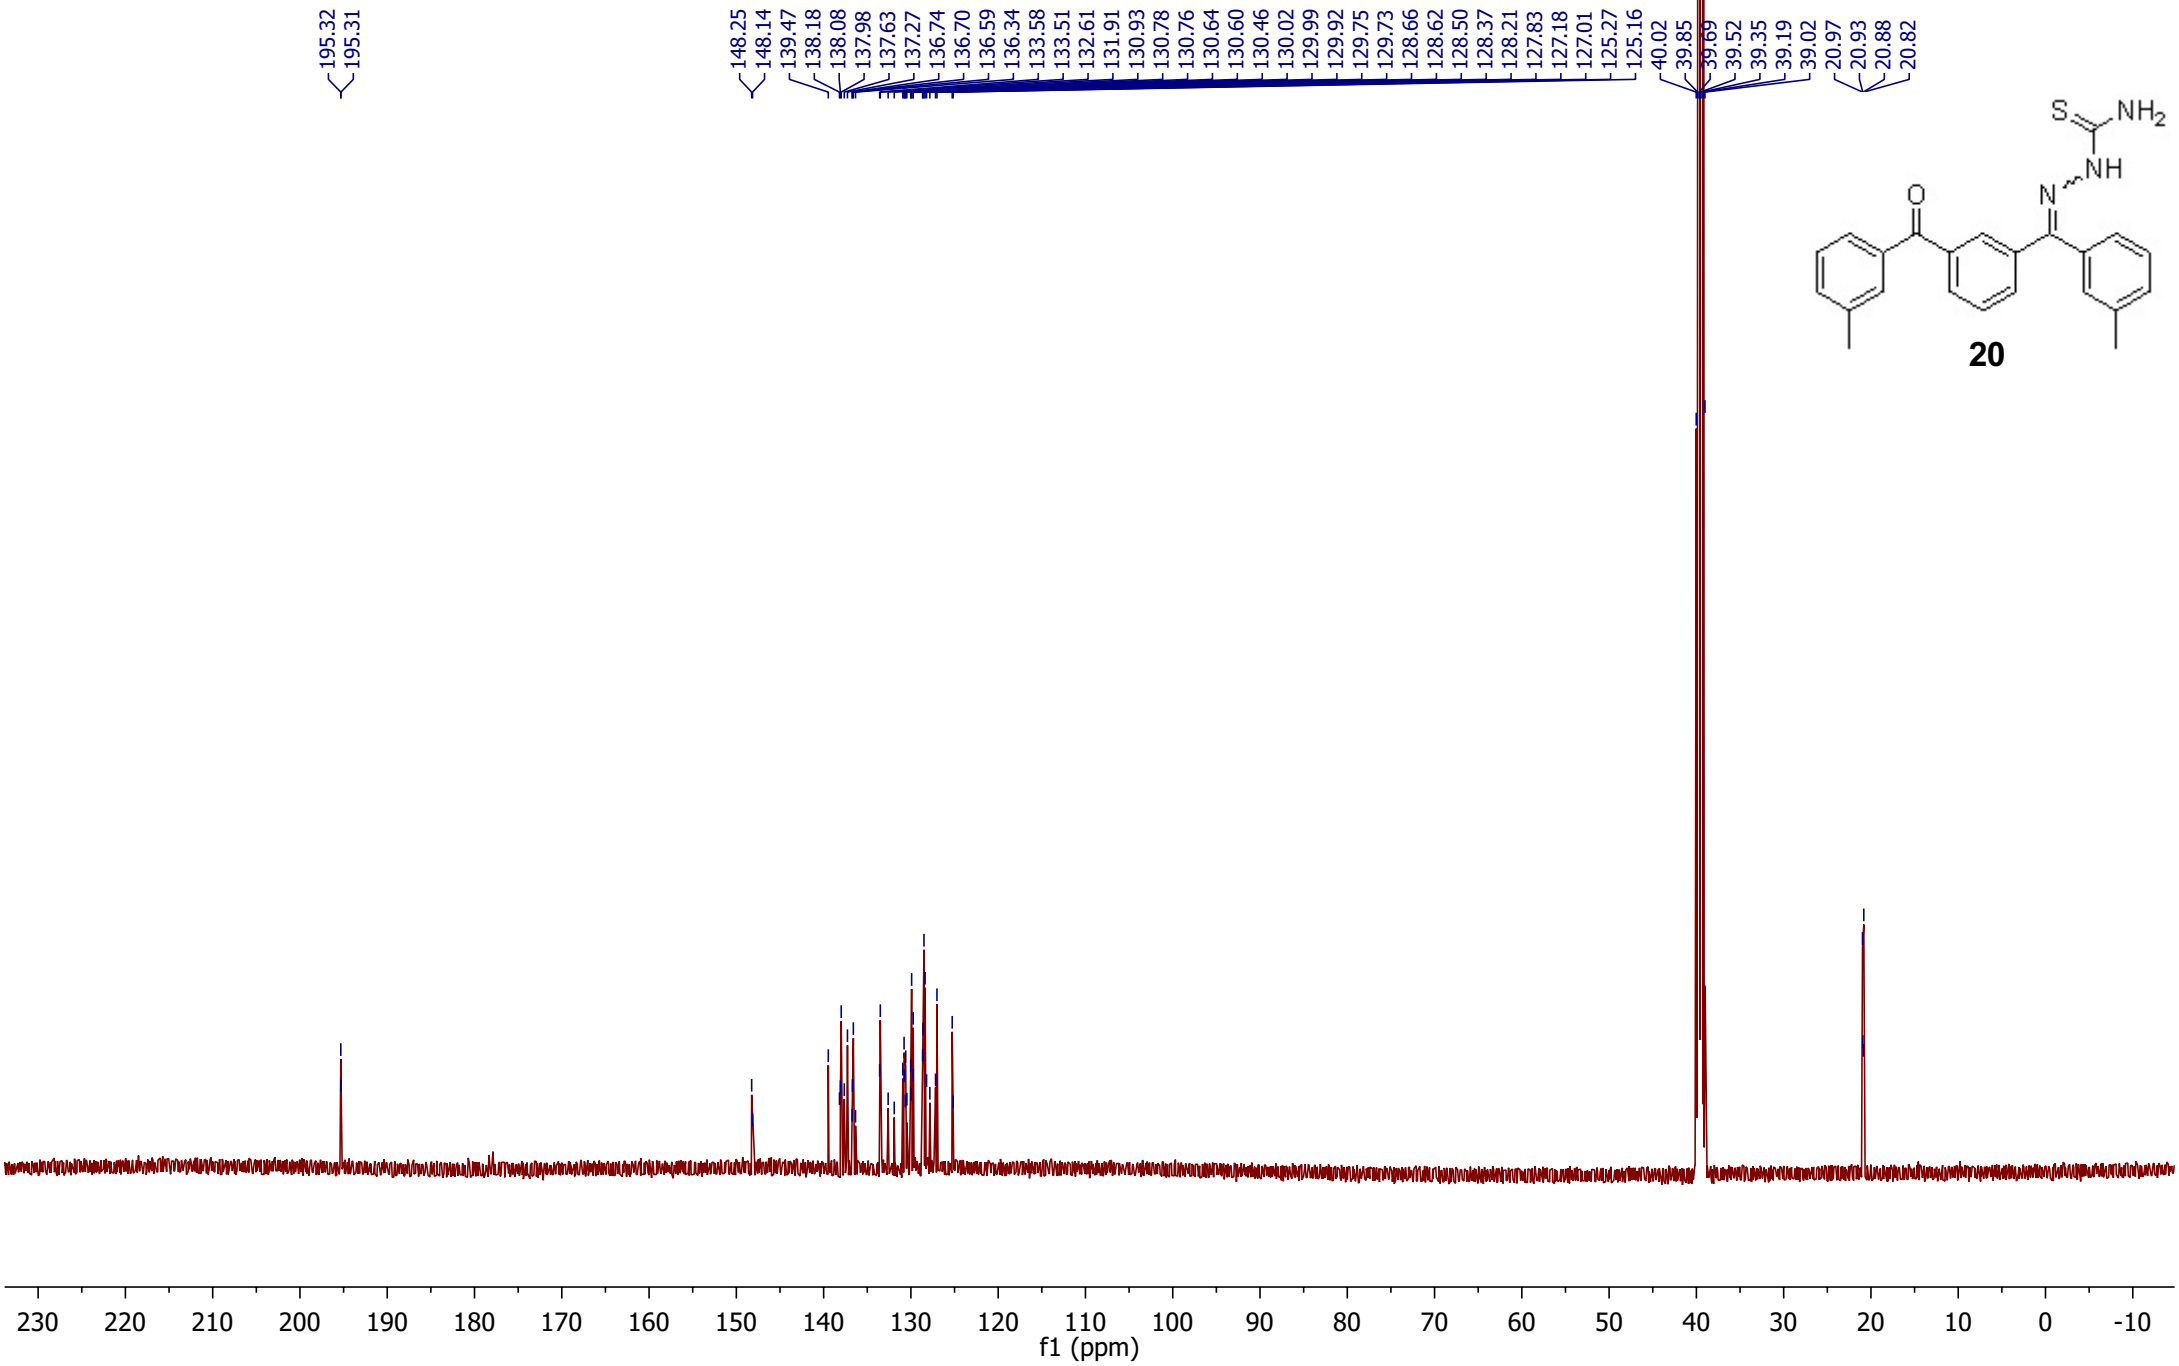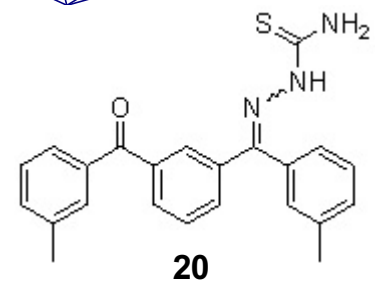



### HPLC trace for Compound 20

=====  
Acq. Operator : ERICAP  
Acq. Instrument : Instrument 1 Location : -  
Injection Date : 4/30/2014 10:43:13 PM  
Acq. Method : C:\CHEM32\1\METHODS\GRAD 2 50-90 ACN.M  
Last changed : 4/30/2014 10:29:31 PM by ERICAP  
Analysis Method : C:\CHEM32\1\DATA\ERICAP\ENPIV09000031.D\DA.M (GRAD 2 50-90 ACN.M)  
Last changed : 6/12/2014 9:09:01 PM by ERICAP  
(modified after loading)  
Sample Info : ENP-IV-09

Method:

0-25 Min. 50:70 to 90:10 ACN:Water  
25-30 min 90:10 ACN:Water

Exist as a mixture of E/Z geometrical isomers in solution as shown  
in H NMR spectra. One peak observed in HPLC trace.

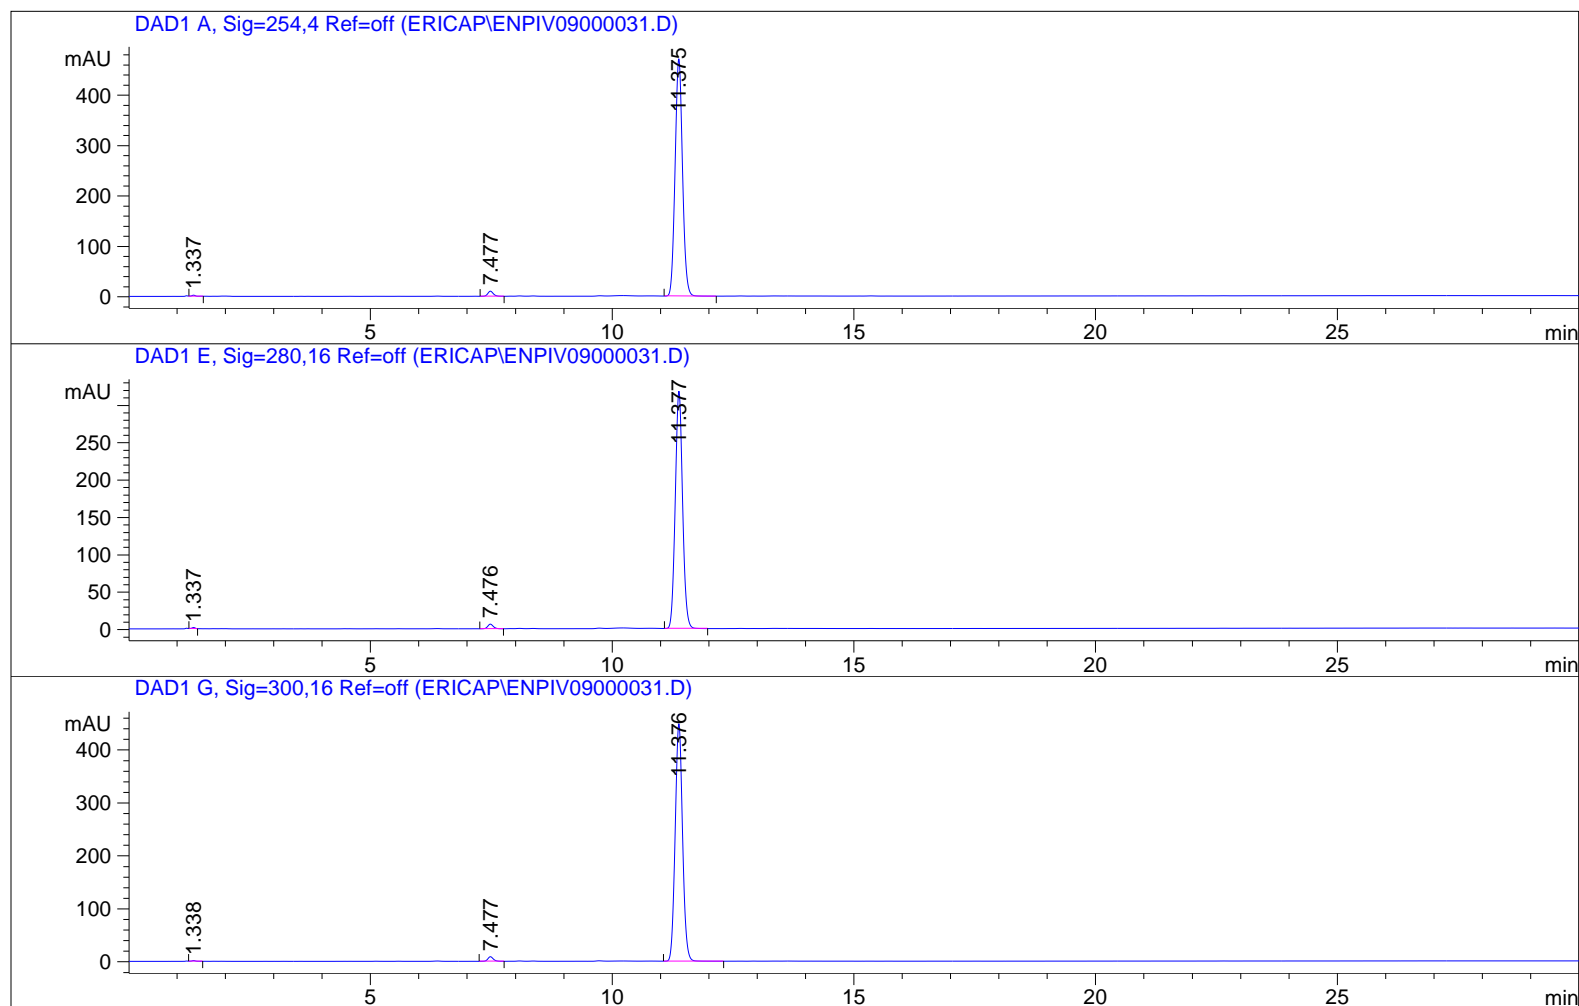

HPLC trace for Compound 20

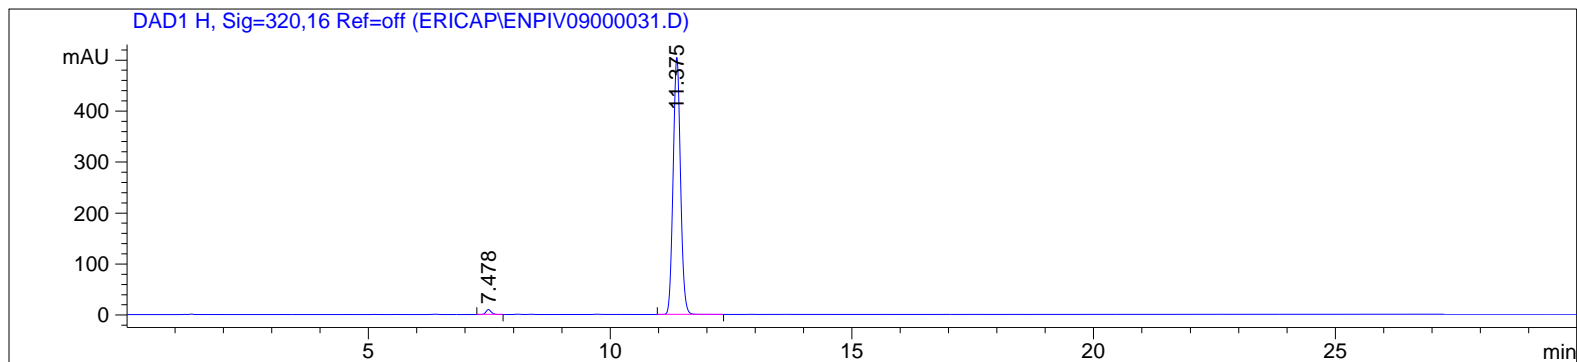

=====  
 Area Percent Report  
 =====

Sorted By : Signal  
 Multiplier : 1.0000  
 Dilution : 1.0000  
 Use Multiplier & Dilution Factor with ISTDs

Signal 1: DAD1 A, Sig=254,4 Ref=off

| Peak # | RetTime [min] | Type | Width [min] | Area [mAU*s] | Height [mAU] | Area %  |
|--------|---------------|------|-------------|--------------|--------------|---------|
| 1      | 1.337         | VB   | 0.0842      | 12.07581     | 2.19581      | 0.2375  |
| 2      | 7.477         | BB   | 0.1215      | 79.19593     | 10.09940     | 1.5578  |
| 3      | 11.375        | BB   | 0.1637      | 4992.60352   | 470.76309    | 98.2047 |

Totals : 5083.87525 483.05830

Signal 2: DAD1 E, Sig=280,16 Ref=off

| Peak # | RetTime [min] | Type | Width [min] | Area [mAU*s] | Height [mAU] | Area %  |
|--------|---------------|------|-------------|--------------|--------------|---------|
| 1      | 1.337         | BB   | 0.0718      | 6.55098      | 1.47447      | 0.1934  |
| 2      | 7.476         | BB   | 0.1222      | 48.78468     | 6.17627      | 1.4403  |
| 3      | 11.377        | BB   | 0.1624      | 3331.74487   | 317.57977    | 98.3663 |

Totals : 3387.08054 325.23052

Signal 3: DAD1 G, Sig=300,16 Ref=off

| Peak # | RetTime [min] | Type | Width [min] | Area [mAU*s] | Height [mAU] | Area %  |
|--------|---------------|------|-------------|--------------|--------------|---------|
| 1      | 1.338         | VB   | 0.0853      | 7.19908      | 1.28711      | 0.1497  |
| 2      | 7.477         | BB   | 0.1205      | 67.01131     | 8.63634      | 1.3932  |
| 3      | 11.376        | BB   | 0.1632      | 4735.58984   | 448.44730    | 98.4571 |

Totals : 4809.80023 458.37075

HPLC trace for Compound 20

Signal 4: DAD1 H, Sig=320,16 Ref=off

| Peak # | RetTime [min] | Type | Width [min] | Area [mAU*s] | Height [mAU] | Area %  |
|--------|---------------|------|-------------|--------------|--------------|---------|
| 1      | 7.478         | BB   | 0.1178      | 74.80412     | 9.71347      | 1.3800  |
| 2      | 11.375        | BB   | 0.1637      | 5345.67920   | 504.13174    | 98.6200 |

Totals :                                   5420.48331   513.84521

=====  
\*\*\* End of Report \*\*\*

# HRMS (ESI) for Compound 20

ENP\_IV\_09\_Orbi\_+ESI (meoh, lock 355.1...

5/7/2014 11:01:35 PM

ENP\_IV\_09\_Orbi\_+ESI (meoh, lock 355.125400) #2-7 RT: 0.02-0.06 AV: 6 NL: 1.79E8  
T: FTMS + p ESI Full ms [150.00-2000.00]

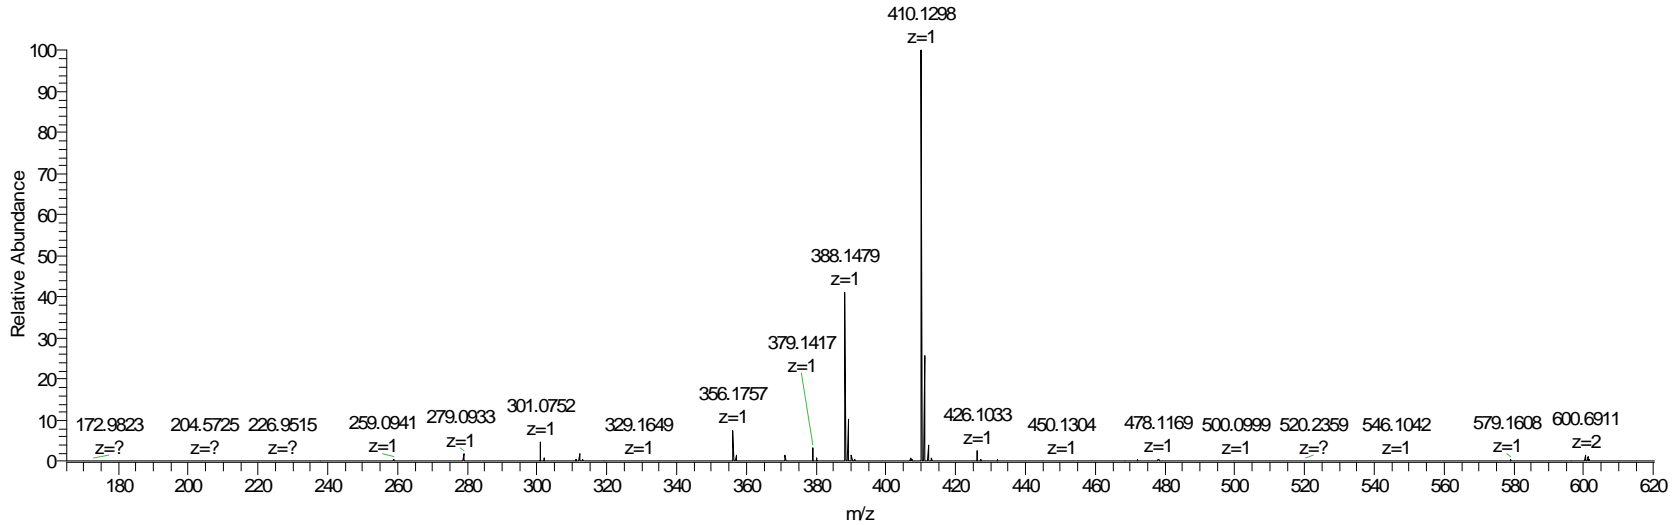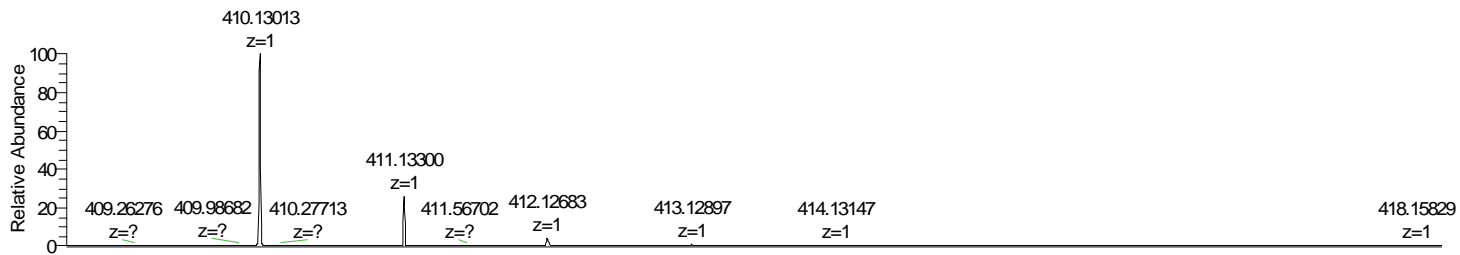

NL:  
2.20E8  
ENP\_IV\_09\_Orbi\_+ESI  
(meoh, lock 355.125400)#2  
RT: 0.02 AV: 1 T: FTMS +  
p ESI Full ms  
[150.00-2000.00]

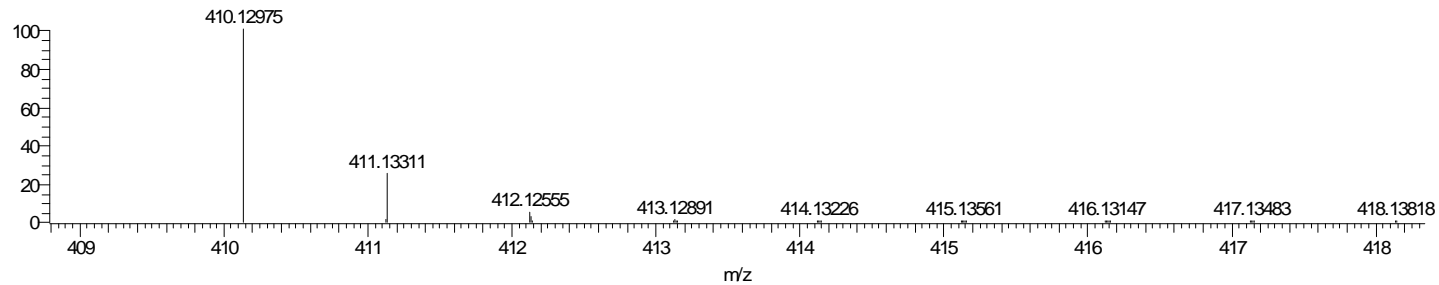

NL:  
7.30E5  
C23H21N3OS+Na+  
C23H21N3O1S1Na1  
pa Chrg 1

<sup>1</sup>H NMR (500 MHz, DMSO-d<sub>6</sub>) of Compound **21**

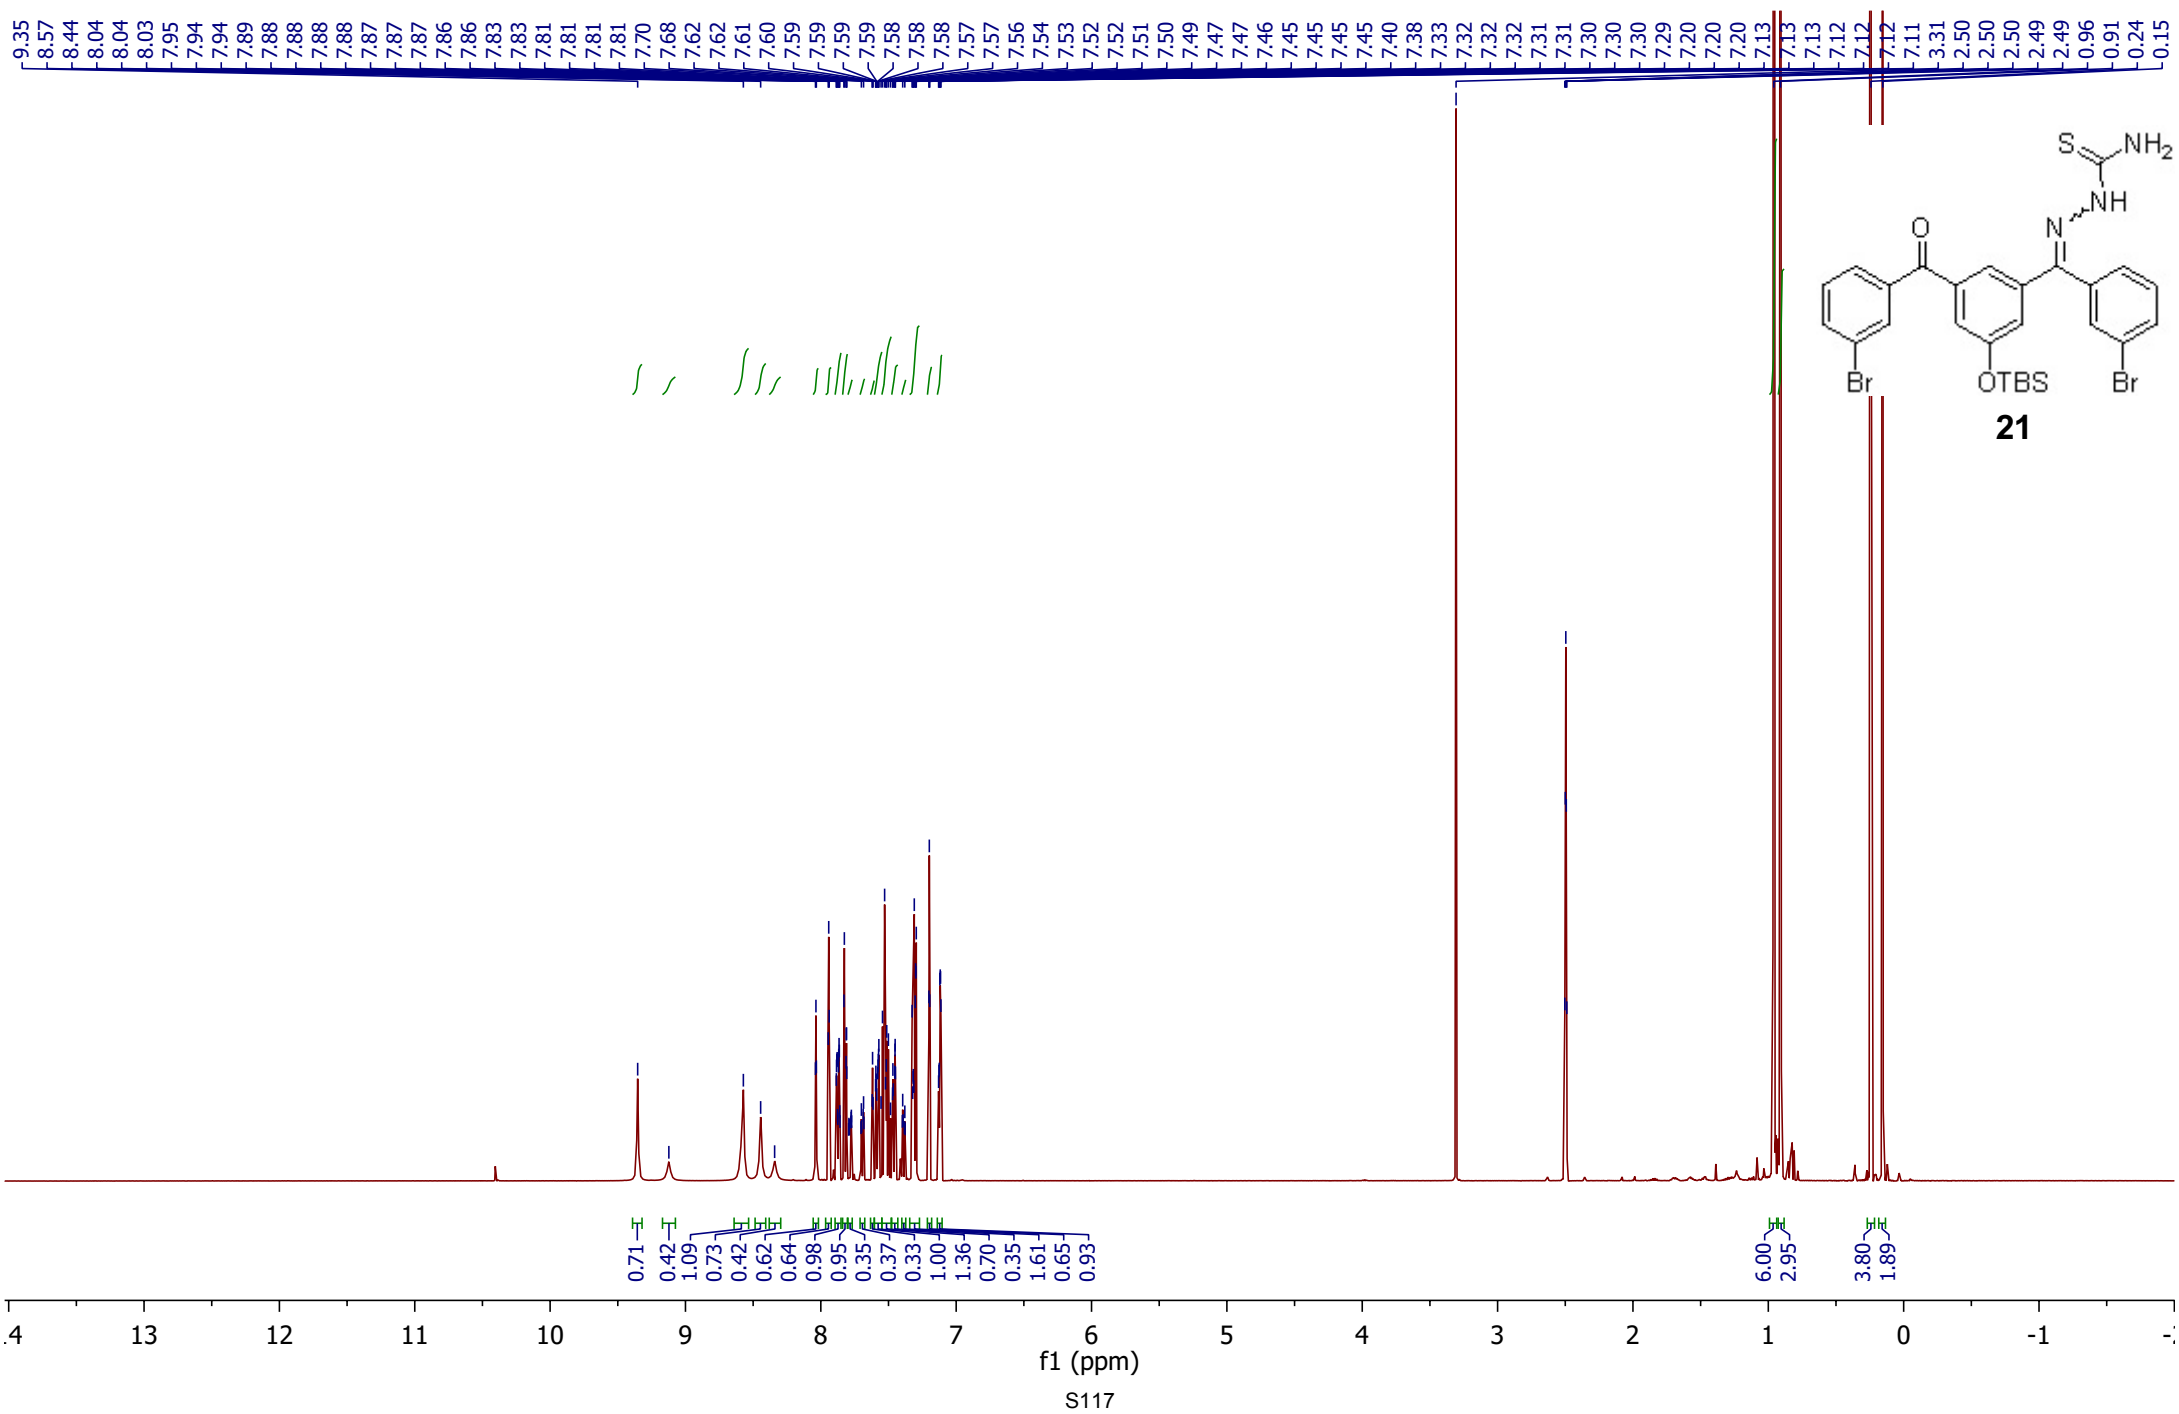

<sup>13</sup>C NMR (125 MHz, DMSO-d<sub>6</sub>) of Compound **21**

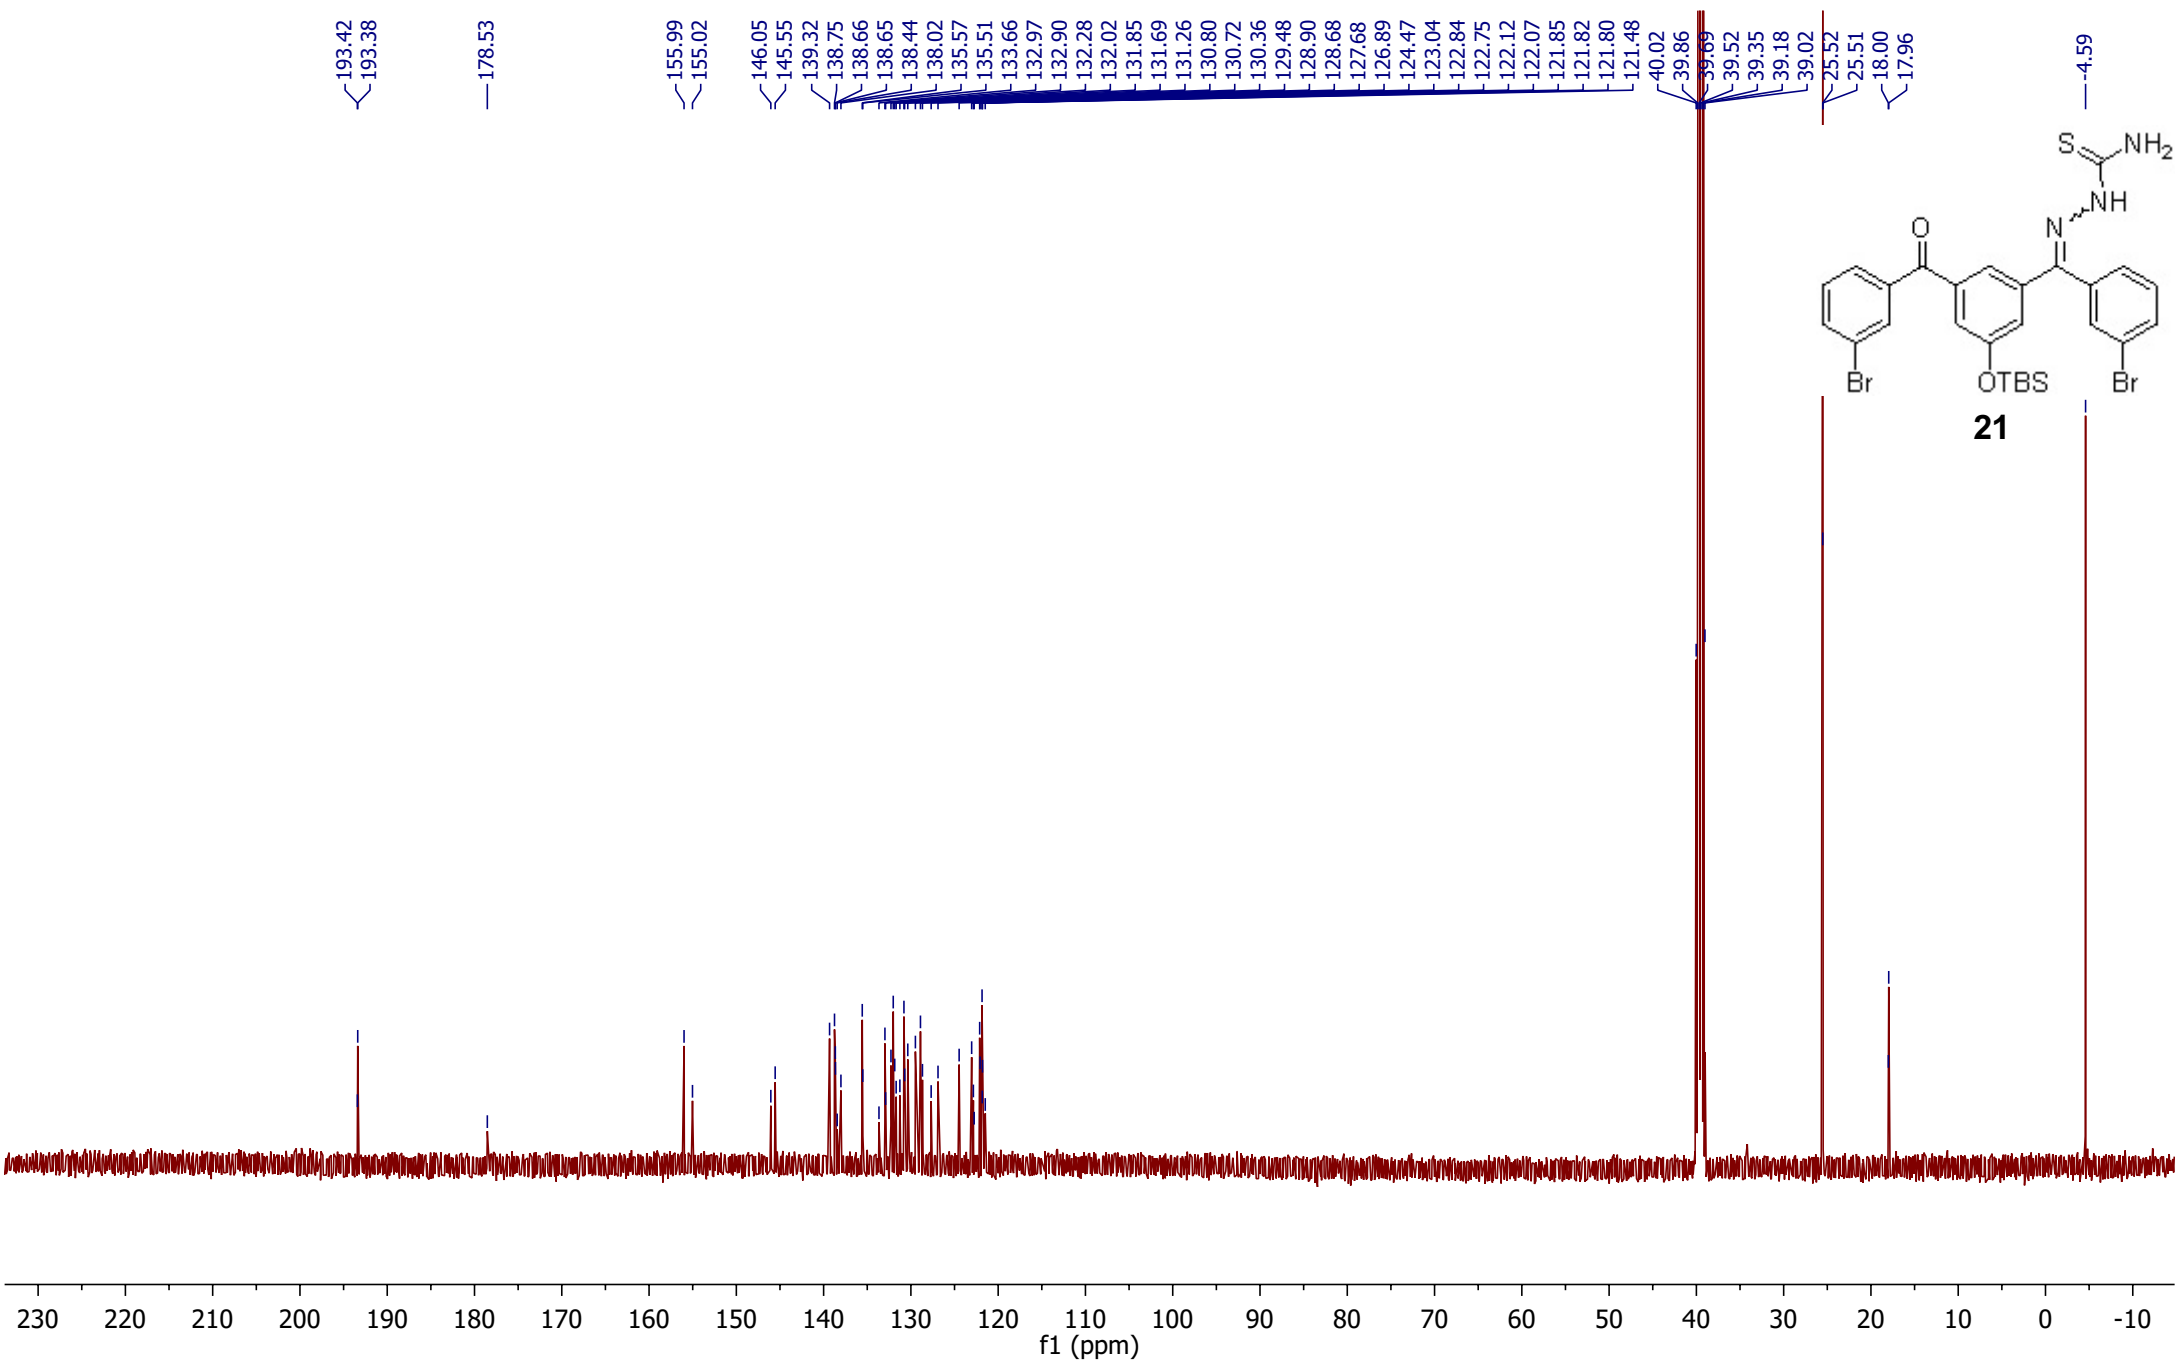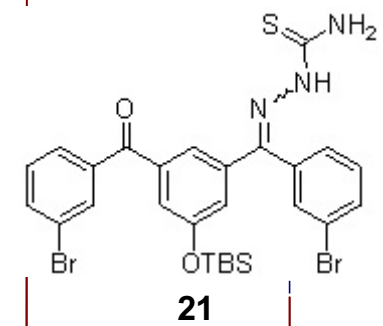

# HRMS (ESI) for Compound 21

C:\Xcalibur\..Erica\12-19-14\ENP\_V\_33

12/19/2014 11:52:10 AM

ENP\_V\_33 #363-377 RT: 3.67-3.83 AV: 15 NL: 1.30E7  
T: FTMS + p ESI Full ms [100.00-700.00]

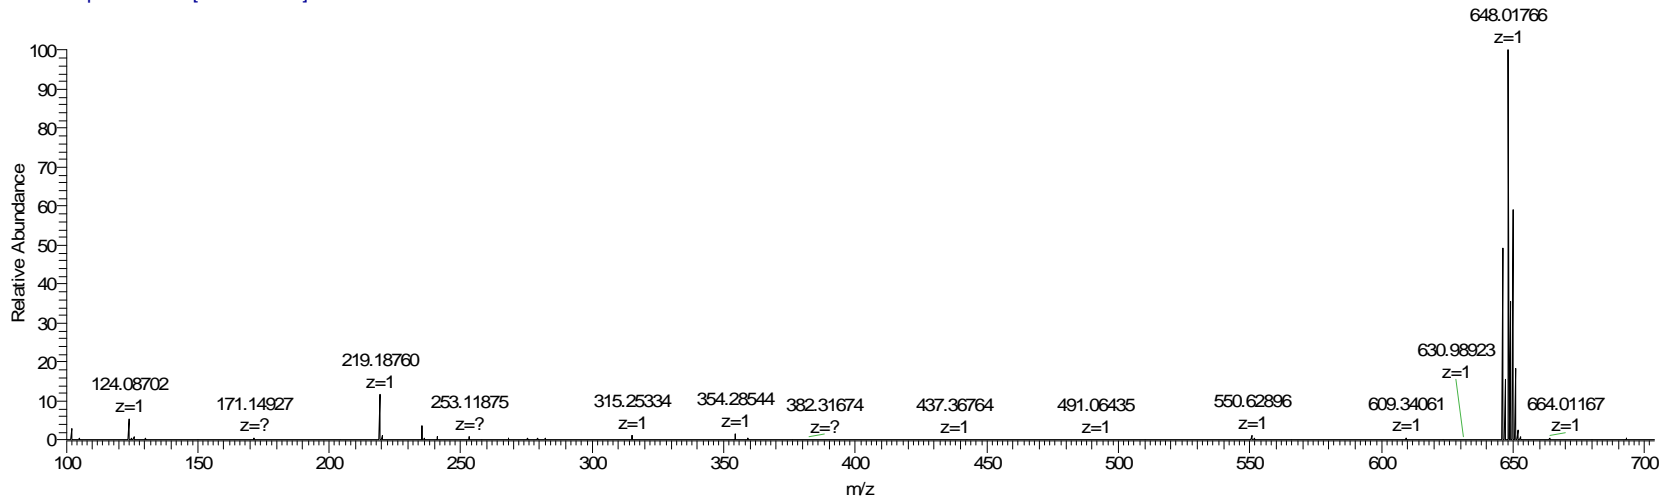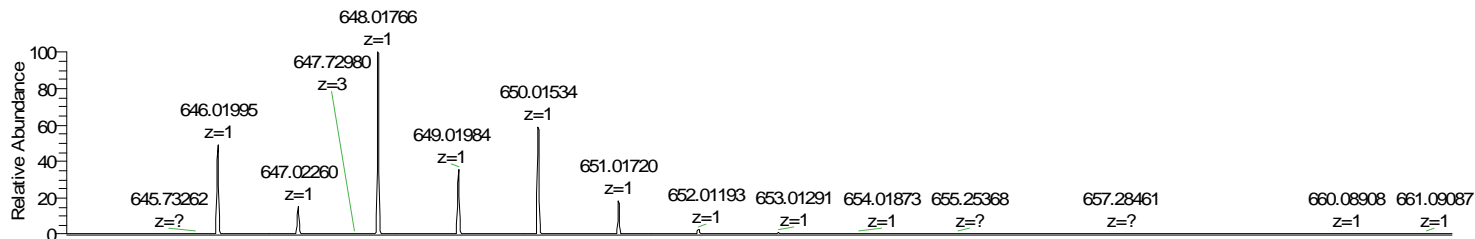

NL:  
1.30E7  
ENP\_V\_33#363-377 RT:  
3.67-3.83 AV: 15 T:  
FTMS + p ESI Full ms  
[100.00-700.00]

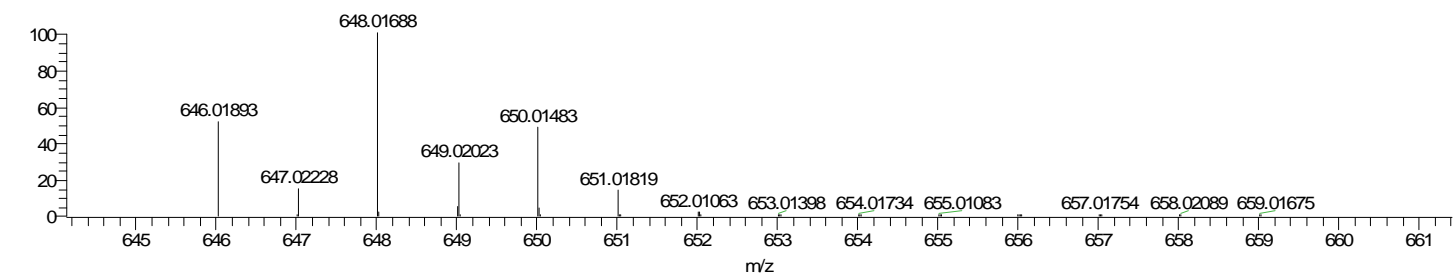

NL:  
3.21E5  
C<sub>27</sub>H<sub>29</sub>Br<sub>2</sub>N<sub>3</sub>O<sub>2</sub>SSi +H  
C<sub>27</sub>H<sub>30</sub>Br<sub>2</sub>N<sub>3</sub>O<sub>2</sub>S<sub>1</sub>Si<sub>1</sub>  
pa Chrg 1

<sup>1</sup>H NMR (500 MHz, DMSO-d<sub>6</sub>) of Compound **22**

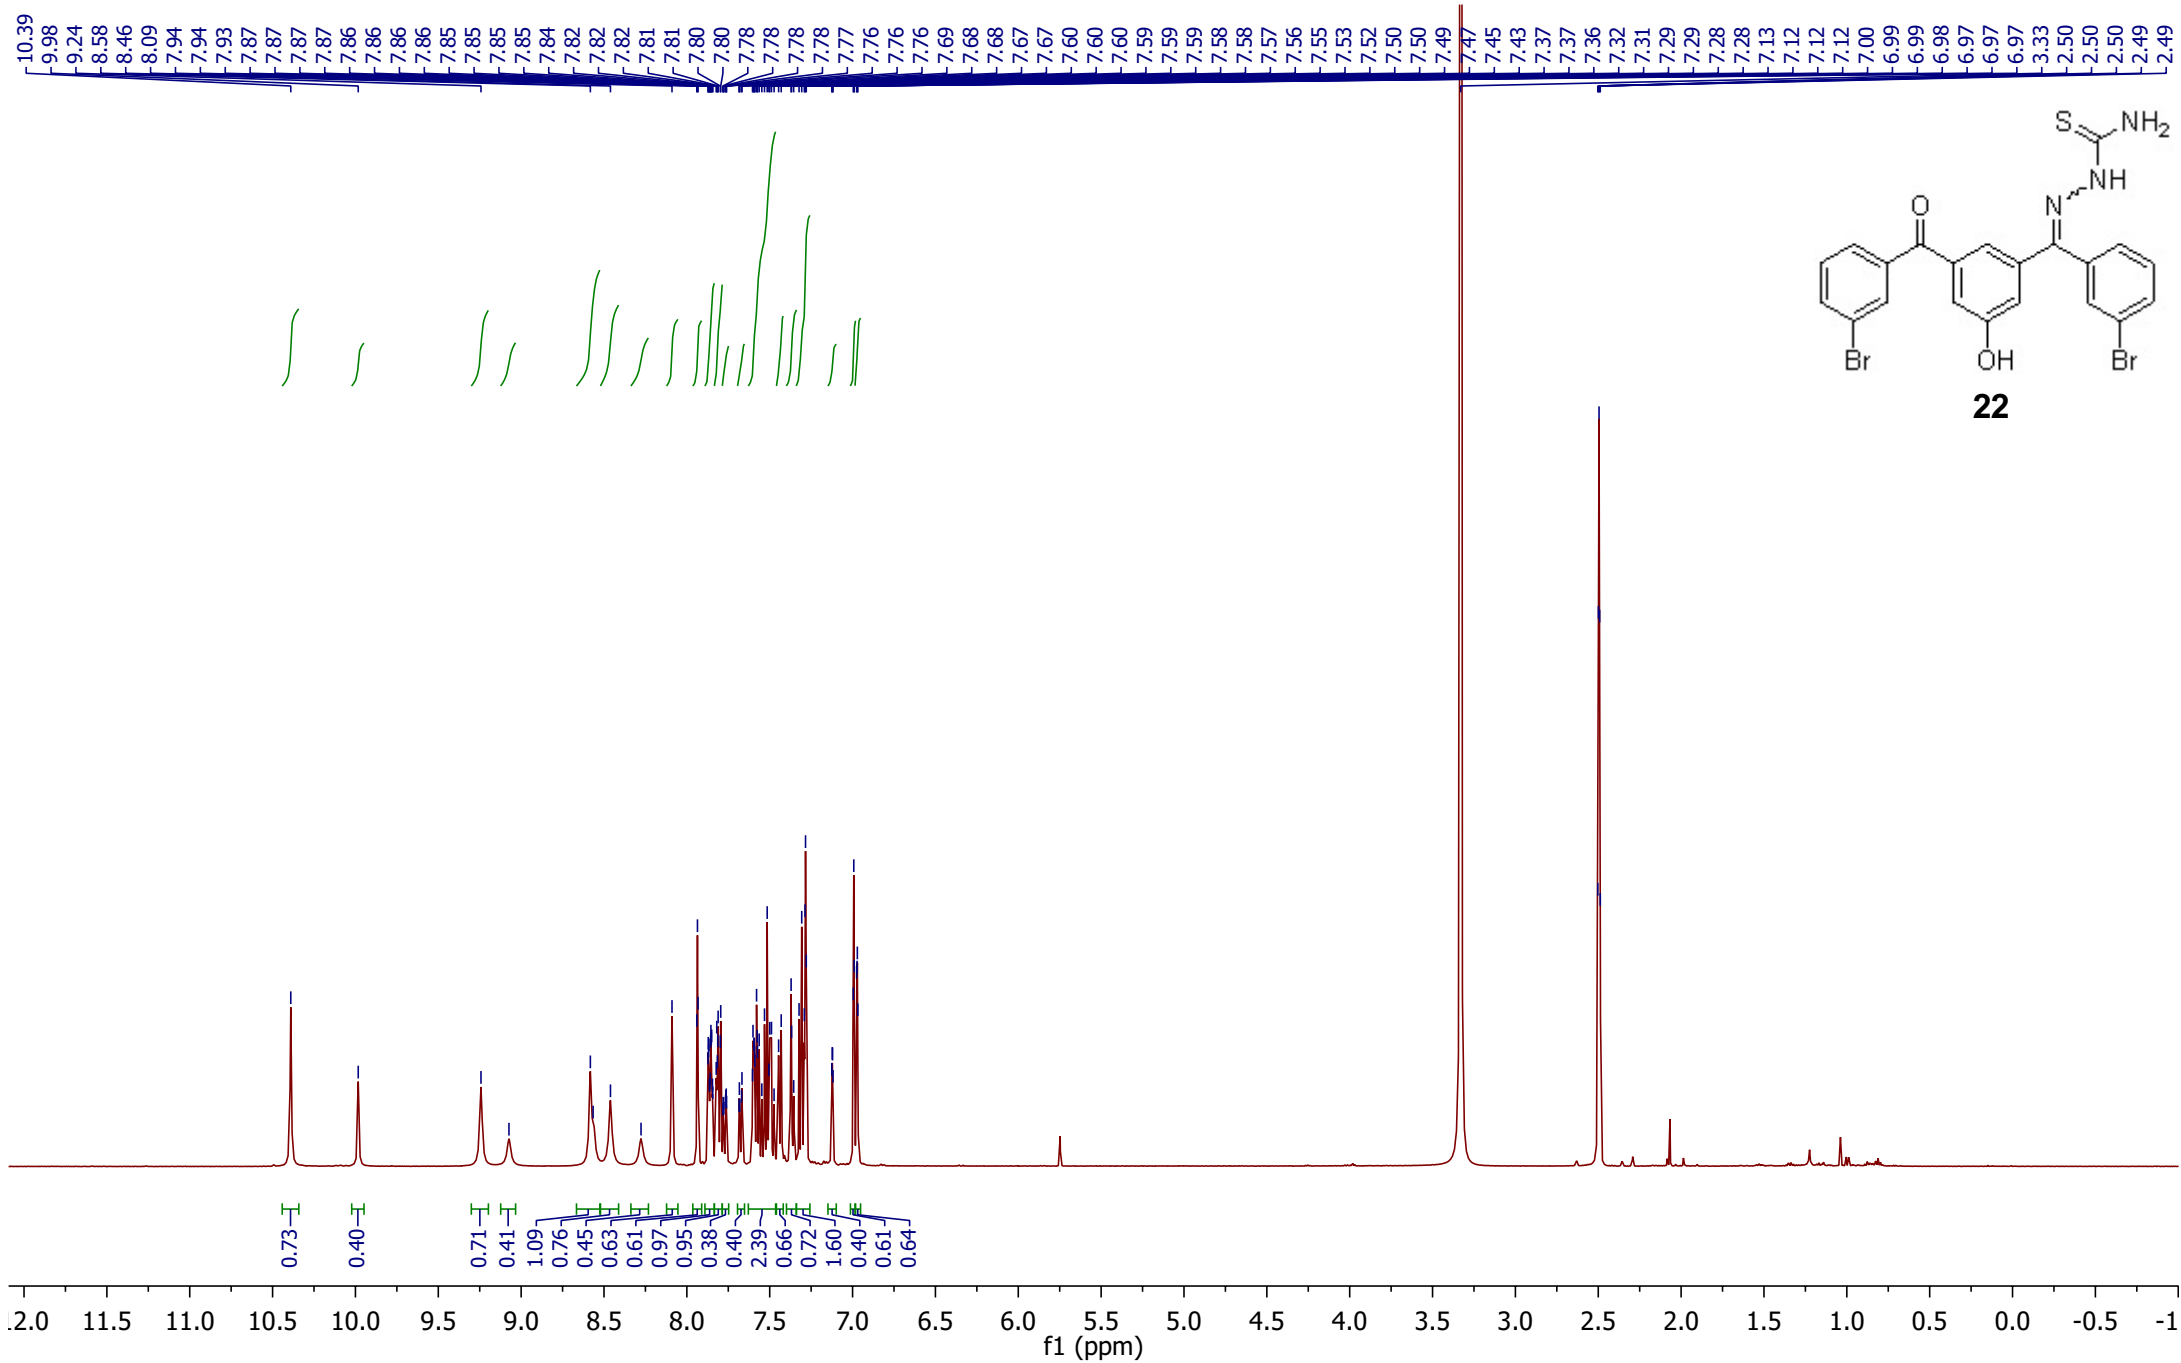



<sup>1</sup>H NMR (500 MHz, DMSO-d<sub>6</sub>) of Compound **22**

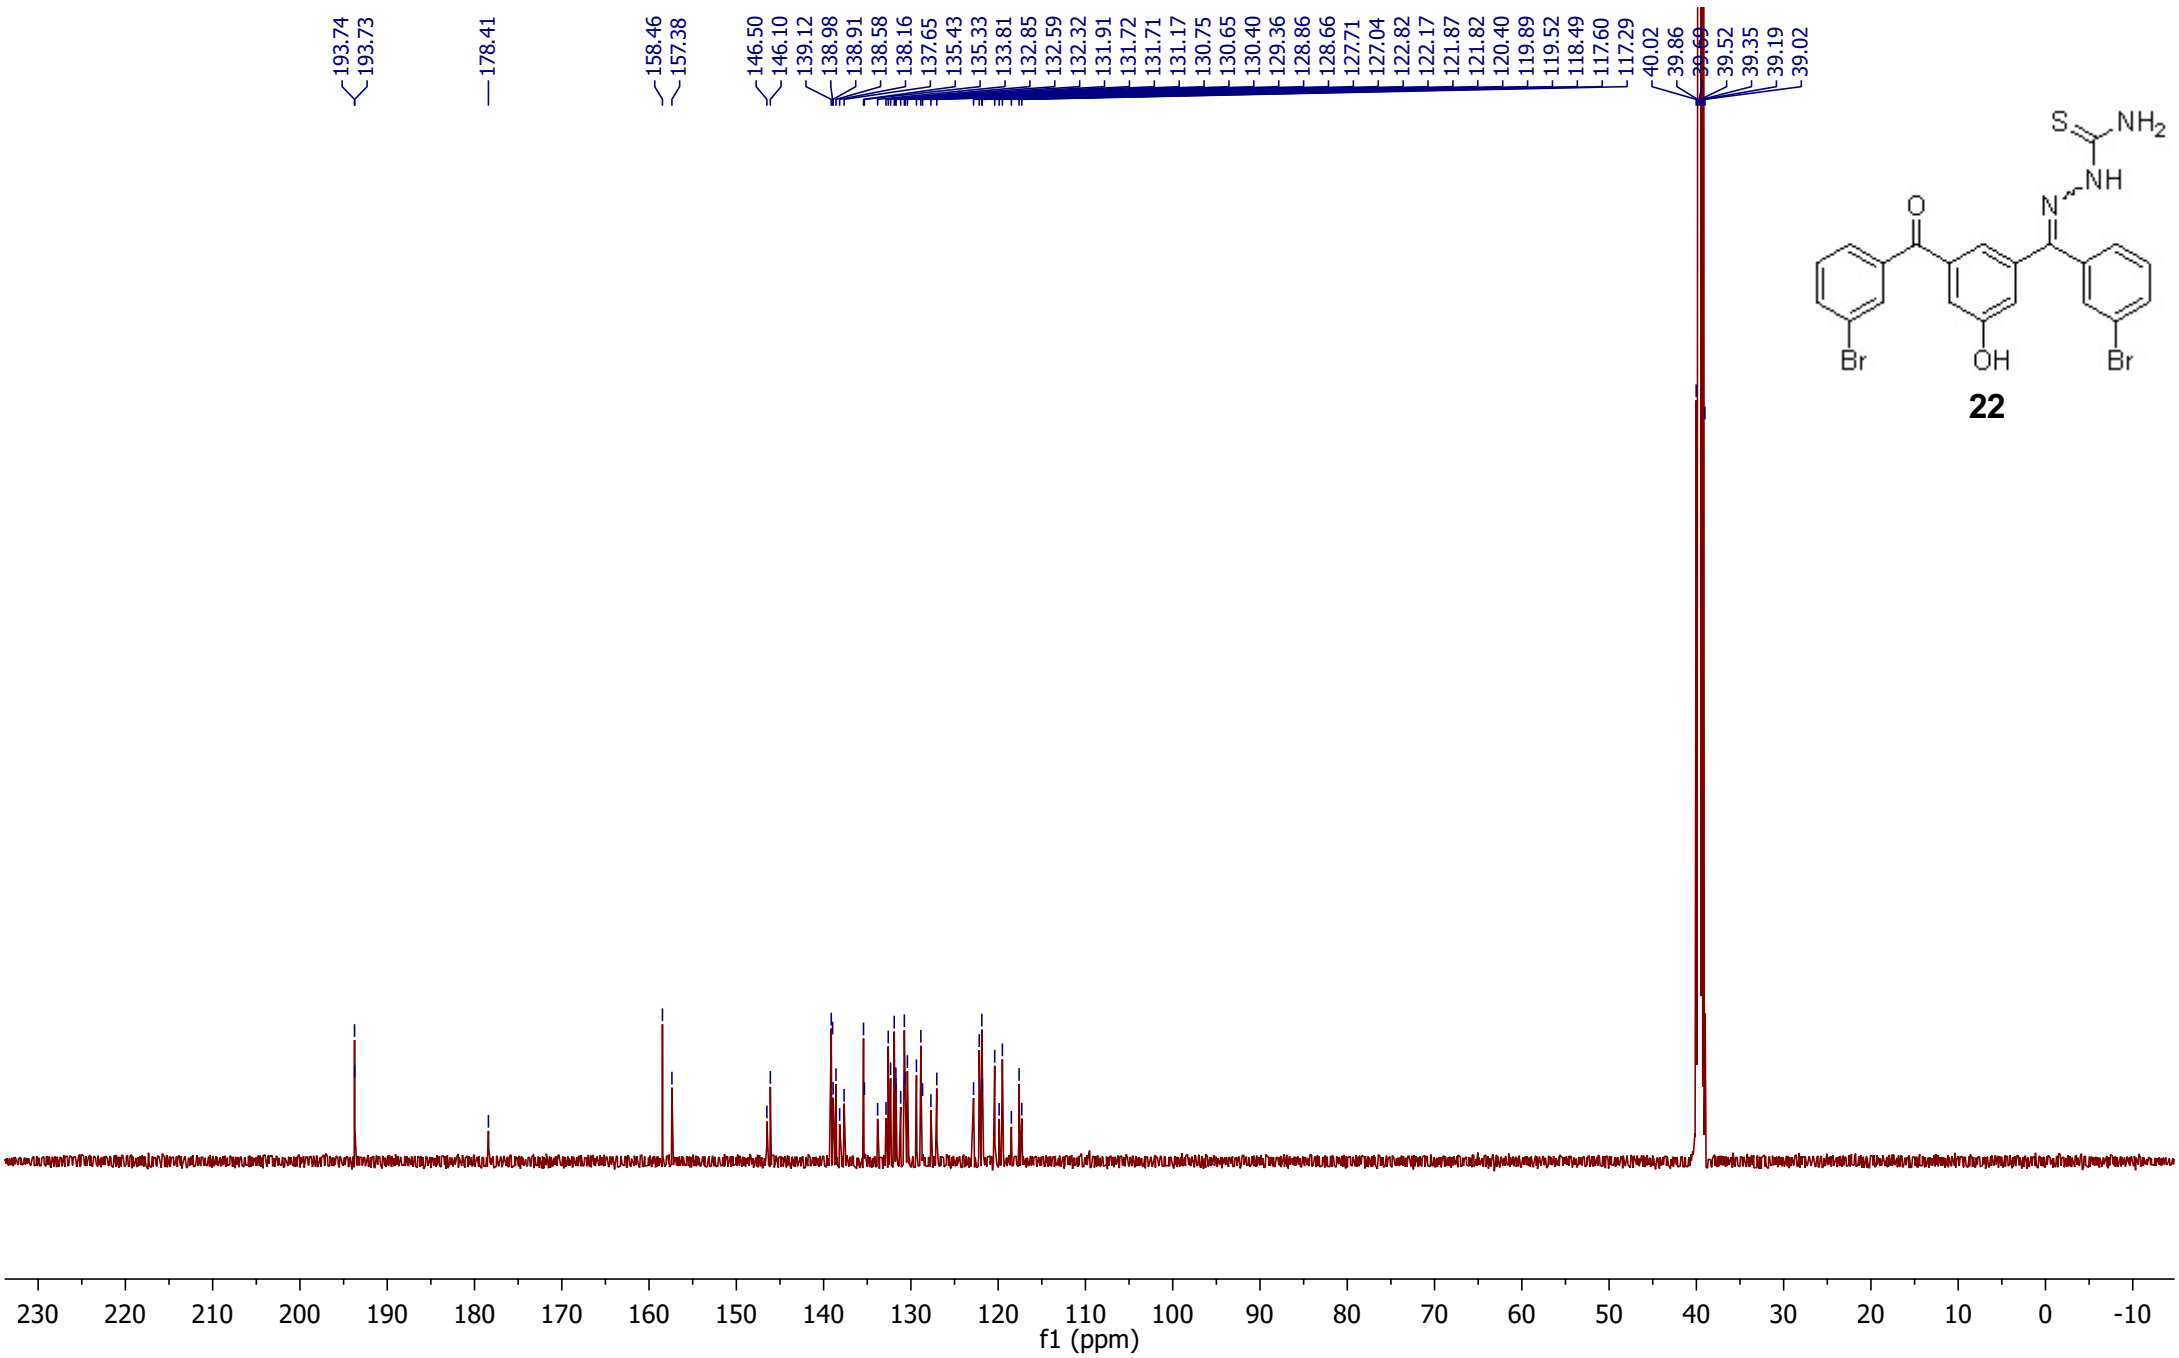

193.74  
193.73

178.41

158.46  
157.38

146.50

146.10

139.12

138.98

138.91

138.58

138.16

137.65

135.43

135.33

133.81

132.85

132.59

132.32

131.91

131.72

131.71

131.17

130.75

130.65

130.40

129.36

128.86

128.66

127.71

127.04

122.82

122.17

121.87

121.82

120.40

119.89

119.52

118.49

117.60

117.29

40.02

39.86

39.69

39.52

39.35

39.19

39.02

### HPLC trace for Compound 22

=====  
Acq. Operator : ERICAP  
Acq. Instrument : Instrument 1 Location : -  
Injection Date : 4/23/2014 9:46:31 PM  
Acq. Method : C:\CHEM32\1\METHODS\GRAD 2 30-90 ACN.M  
Last changed : 4/23/2014 9:43:22 PM by ERICAP  
Analysis Method : C:\CHEM32\1\DATA\ERICAP\ENPV34000032.D\DA.M (GRAD 2 30-90 ACN.M)  
Last changed : 6/12/2014 11:25:01 PM by ERICAP  
(modified after loading)  
Sample Info : ENP-V-34

Method:

0-25 Min. 30:70 to 90:10 ACN:Water  
25-30 min 90:10 ACN:Water

Two peaks observed in the HPLC traces are due to the presence of both E and Z geometrical isomers.

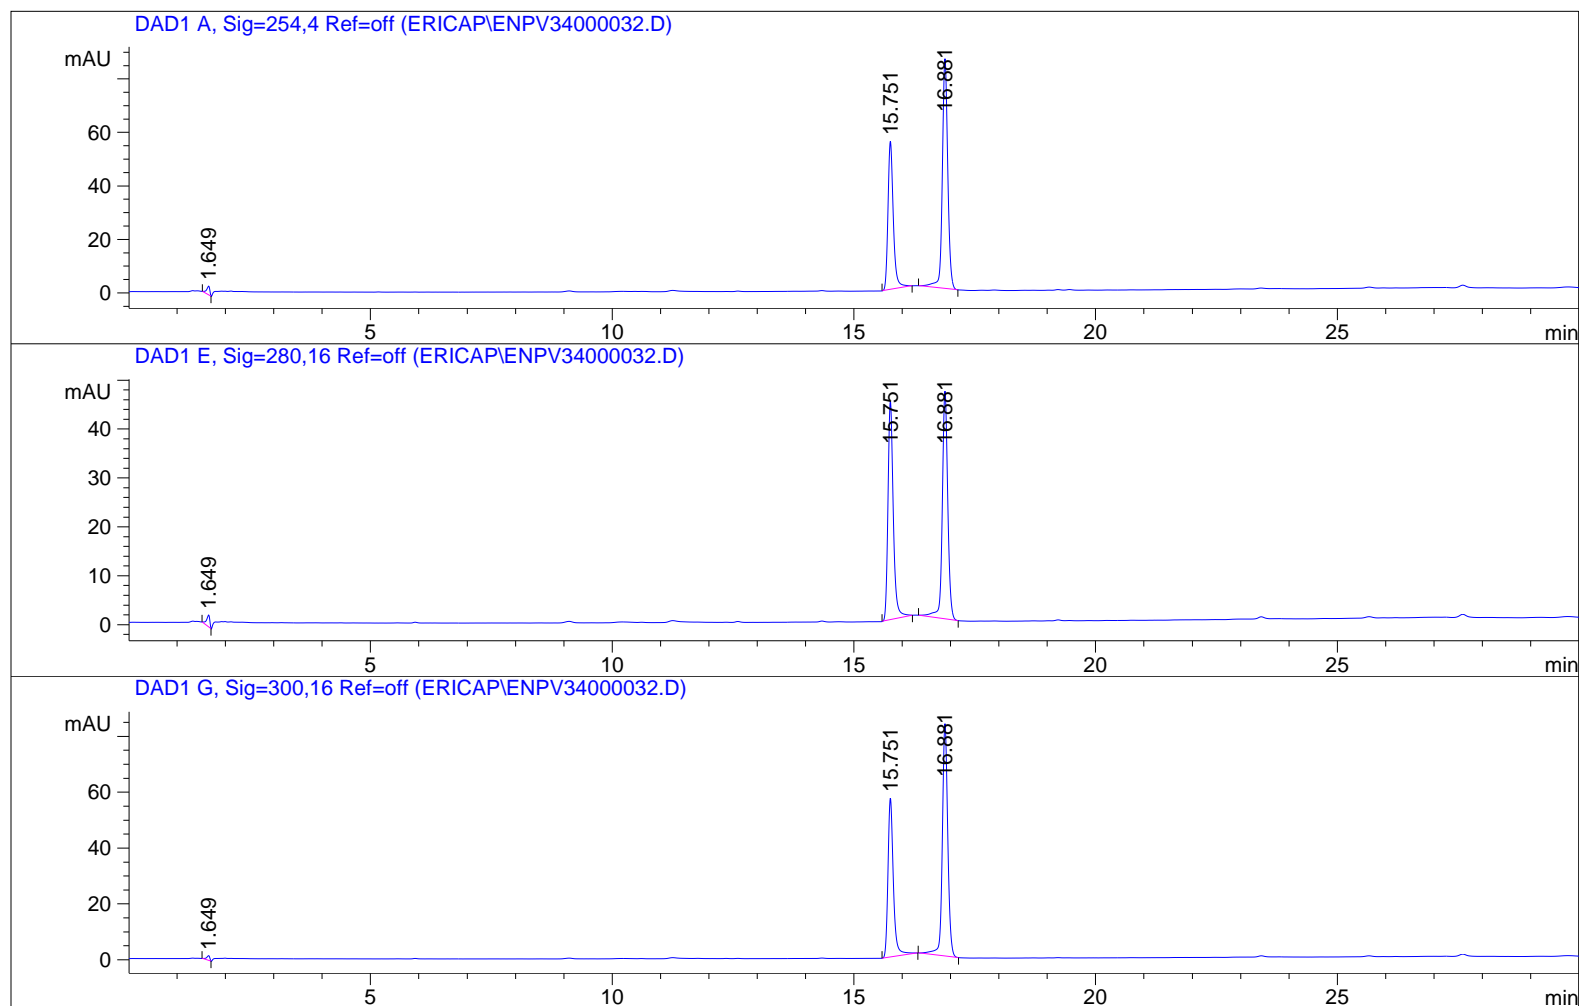

HPLC trace for Compound 22

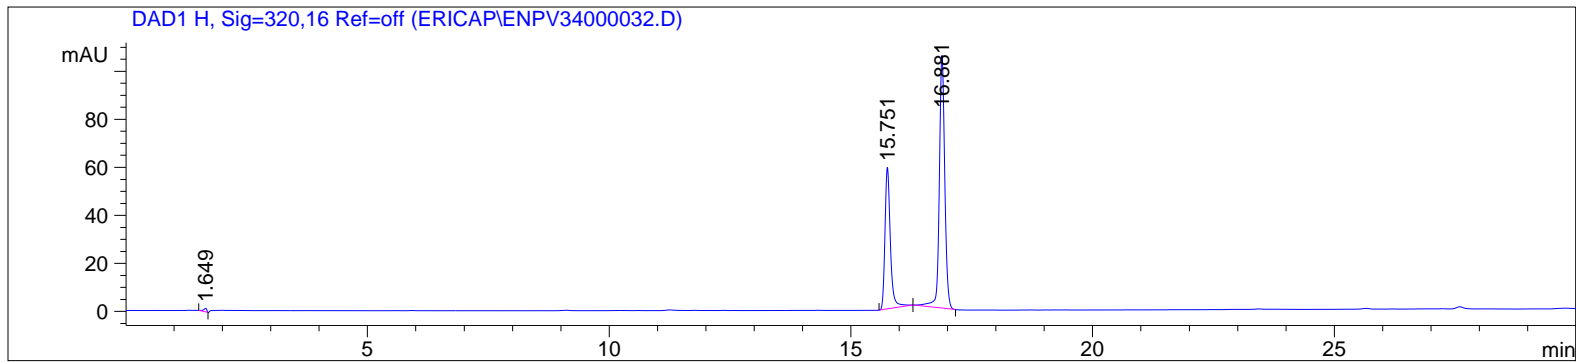

=====  
 Area Percent Report  
 =====

Sorted By : Signal  
 Multiplier : 1.0000  
 Dilution : 1.0000  
 Use Multiplier & Dilution Factor with ISTDs

Signal 1: DAD1 A, Sig=254,4 Ref=off

| Peak # | RetTime [min] | Type | Width [min] | Area [mAU*s] | Height [mAU] | Area %  |
|--------|---------------|------|-------------|--------------|--------------|---------|
| 1      | 1.649         | BB   | 0.0681      | 14.61391     | 3.27222      | 1.3158  |
| 2      | 15.751        | BB   | 0.1150      | 422.91922    | 55.41271     | 38.0777 |
| 3      | 16.881        | BB   | 0.1193      | 673.14227    | 85.99469     | 60.6066 |

Totals : 1110.67541 144.67962

Signal 2: DAD1 E, Sig=280,16 Ref=off

| Peak # | RetTime [min] | Type | Width [min] | Area [mAU*s] | Height [mAU] | Area %  |
|--------|---------------|------|-------------|--------------|--------------|---------|
| 1      | 1.649         | BB   | 0.0712      | 11.05270     | 2.42217      | 1.5396  |
| 2      | 15.751        | BB   | 0.1148      | 340.31268    | 44.72145     | 47.4036 |
| 3      | 16.881        | BB   | 0.1198      | 366.53976    | 46.58216     | 51.0569 |

Totals : 717.90515 93.72577

Signal 3: DAD1 G, Sig=300,16 Ref=off

| Peak # | RetTime [min] | Type | Width [min] | Area [mAU*s] | Height [mAU] | Area %  |
|--------|---------------|------|-------------|--------------|--------------|---------|
| 1      | 1.649         | BB   | 0.0716      | 7.99208      | 1.74052      | 0.7262  |
| 2      | 15.751        | BB   | 0.1163      | 440.12030    | 56.88736     | 39.9926 |
| 3      | 16.881        | BB   | 0.1194      | 652.39142    | 83.24355     | 59.2812 |

Totals : 1100.50380 141.87144

### HPLC trace for Compound 22

Signal 4: DAD1 H, Sig=320,16 Ref=off

| Peak # | RetTime [min] | Type | Width [min] | Area [mAU*s] | Height [mAU] | Area %  |
|--------|---------------|------|-------------|--------------|--------------|---------|
| 1      | 1.649         | BB   | 0.0707      | 7.10945      | 1.51755      | 0.5515  |
| 2      | 15.751        | BB   | 0.1161      | 455.21680    | 58.96165     | 35.3130 |
| 3      | 16.881        | BB   | 0.1196      | 826.76489    | 105.30540    | 64.1355 |

Totals :                                   1289.09114  165.78460

=====  
\*\*\* End of Report \*\*\*

# HRMS(ESI) for Compound 22

C:\Xcalibur\...ENP\_V\_34\_run4\_Orbi+ESI

1/13/2015 10:57:00 PM

ENP\_V\_34\_run4\_Orbi+ESI #1-2 RT: 0.01-0.02 AV: 2 NL: 8.66E5  
T: FTMS + p ESI Full ms [100.00-1000.00]

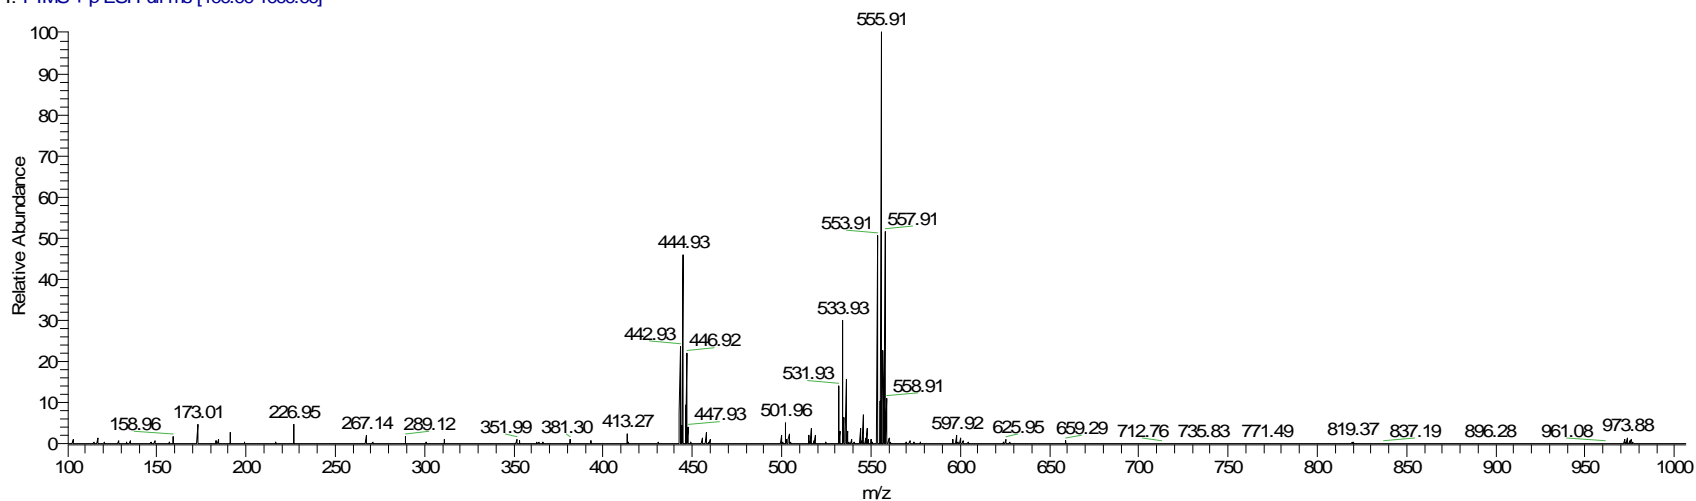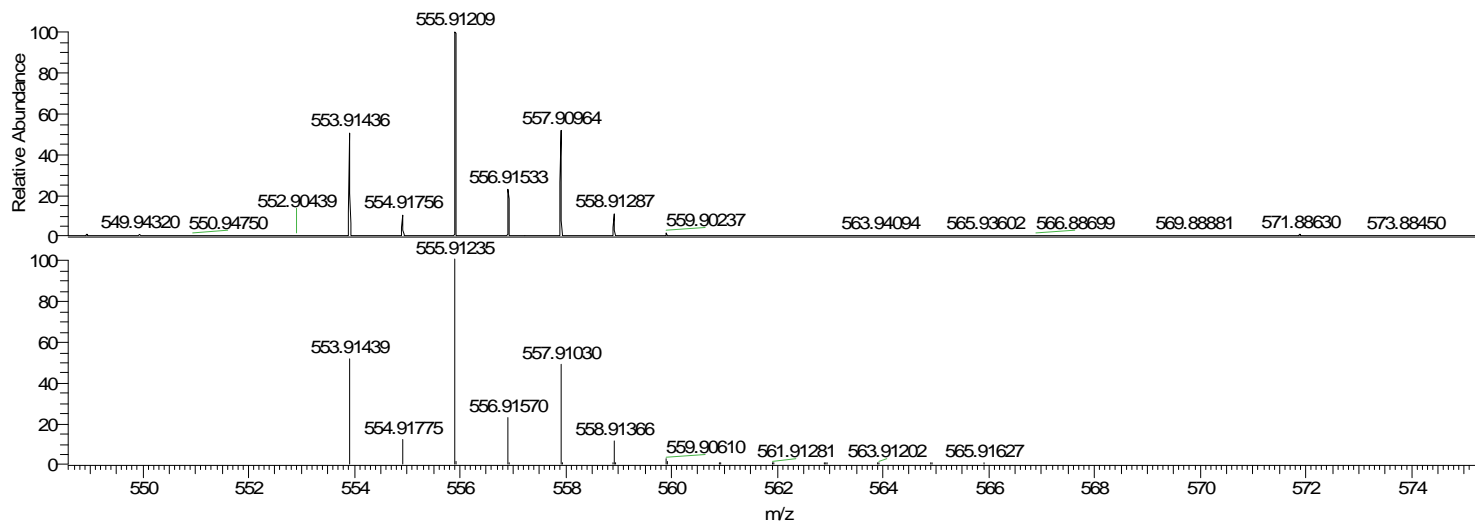

NL:  
8.66E5  
ENP\_V\_34\_run4\_Orbi+  
ESI#1-2 RT: 0.01-0.02  
AV: 2 T: FTMS + p ESI  
Full ms [100.00-1000.00]

NL:  
3.72E5  
C21H15Br2N3O2S+Na+  
C21H15Br2N3O2S1Na1  
pa Chrg 1

<sup>1</sup>H NMR (500 MHz, CDCl<sub>3</sub>) of Compound **23**

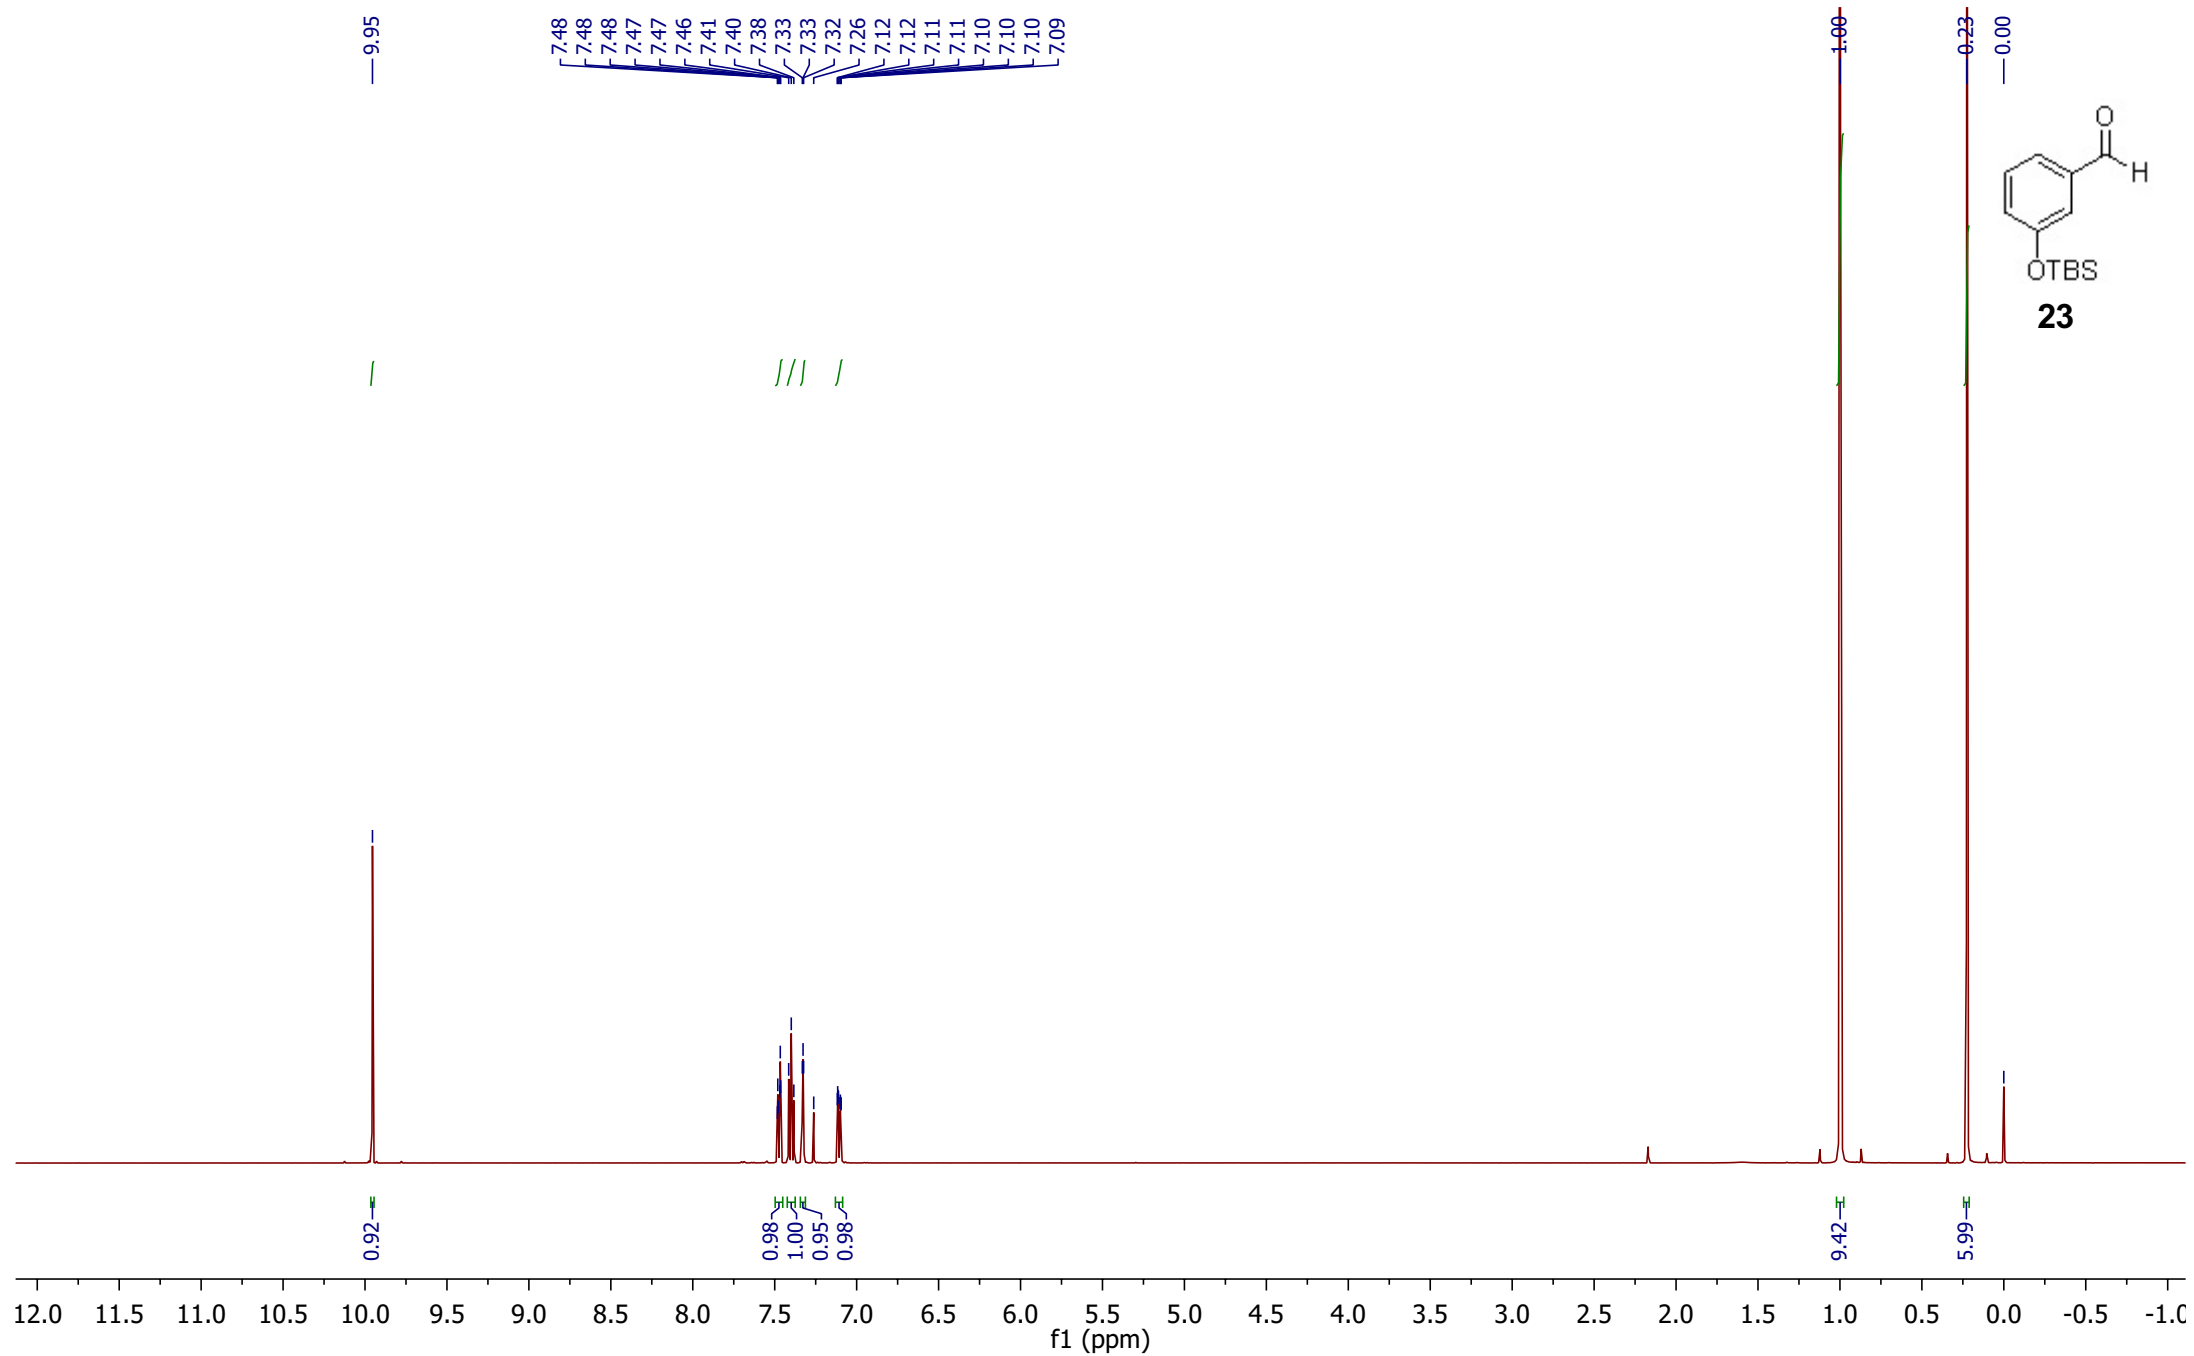

$^{13}\text{C}$  NMR (125 MHz,  $\text{CDCl}_3$ ) of Compound **23**

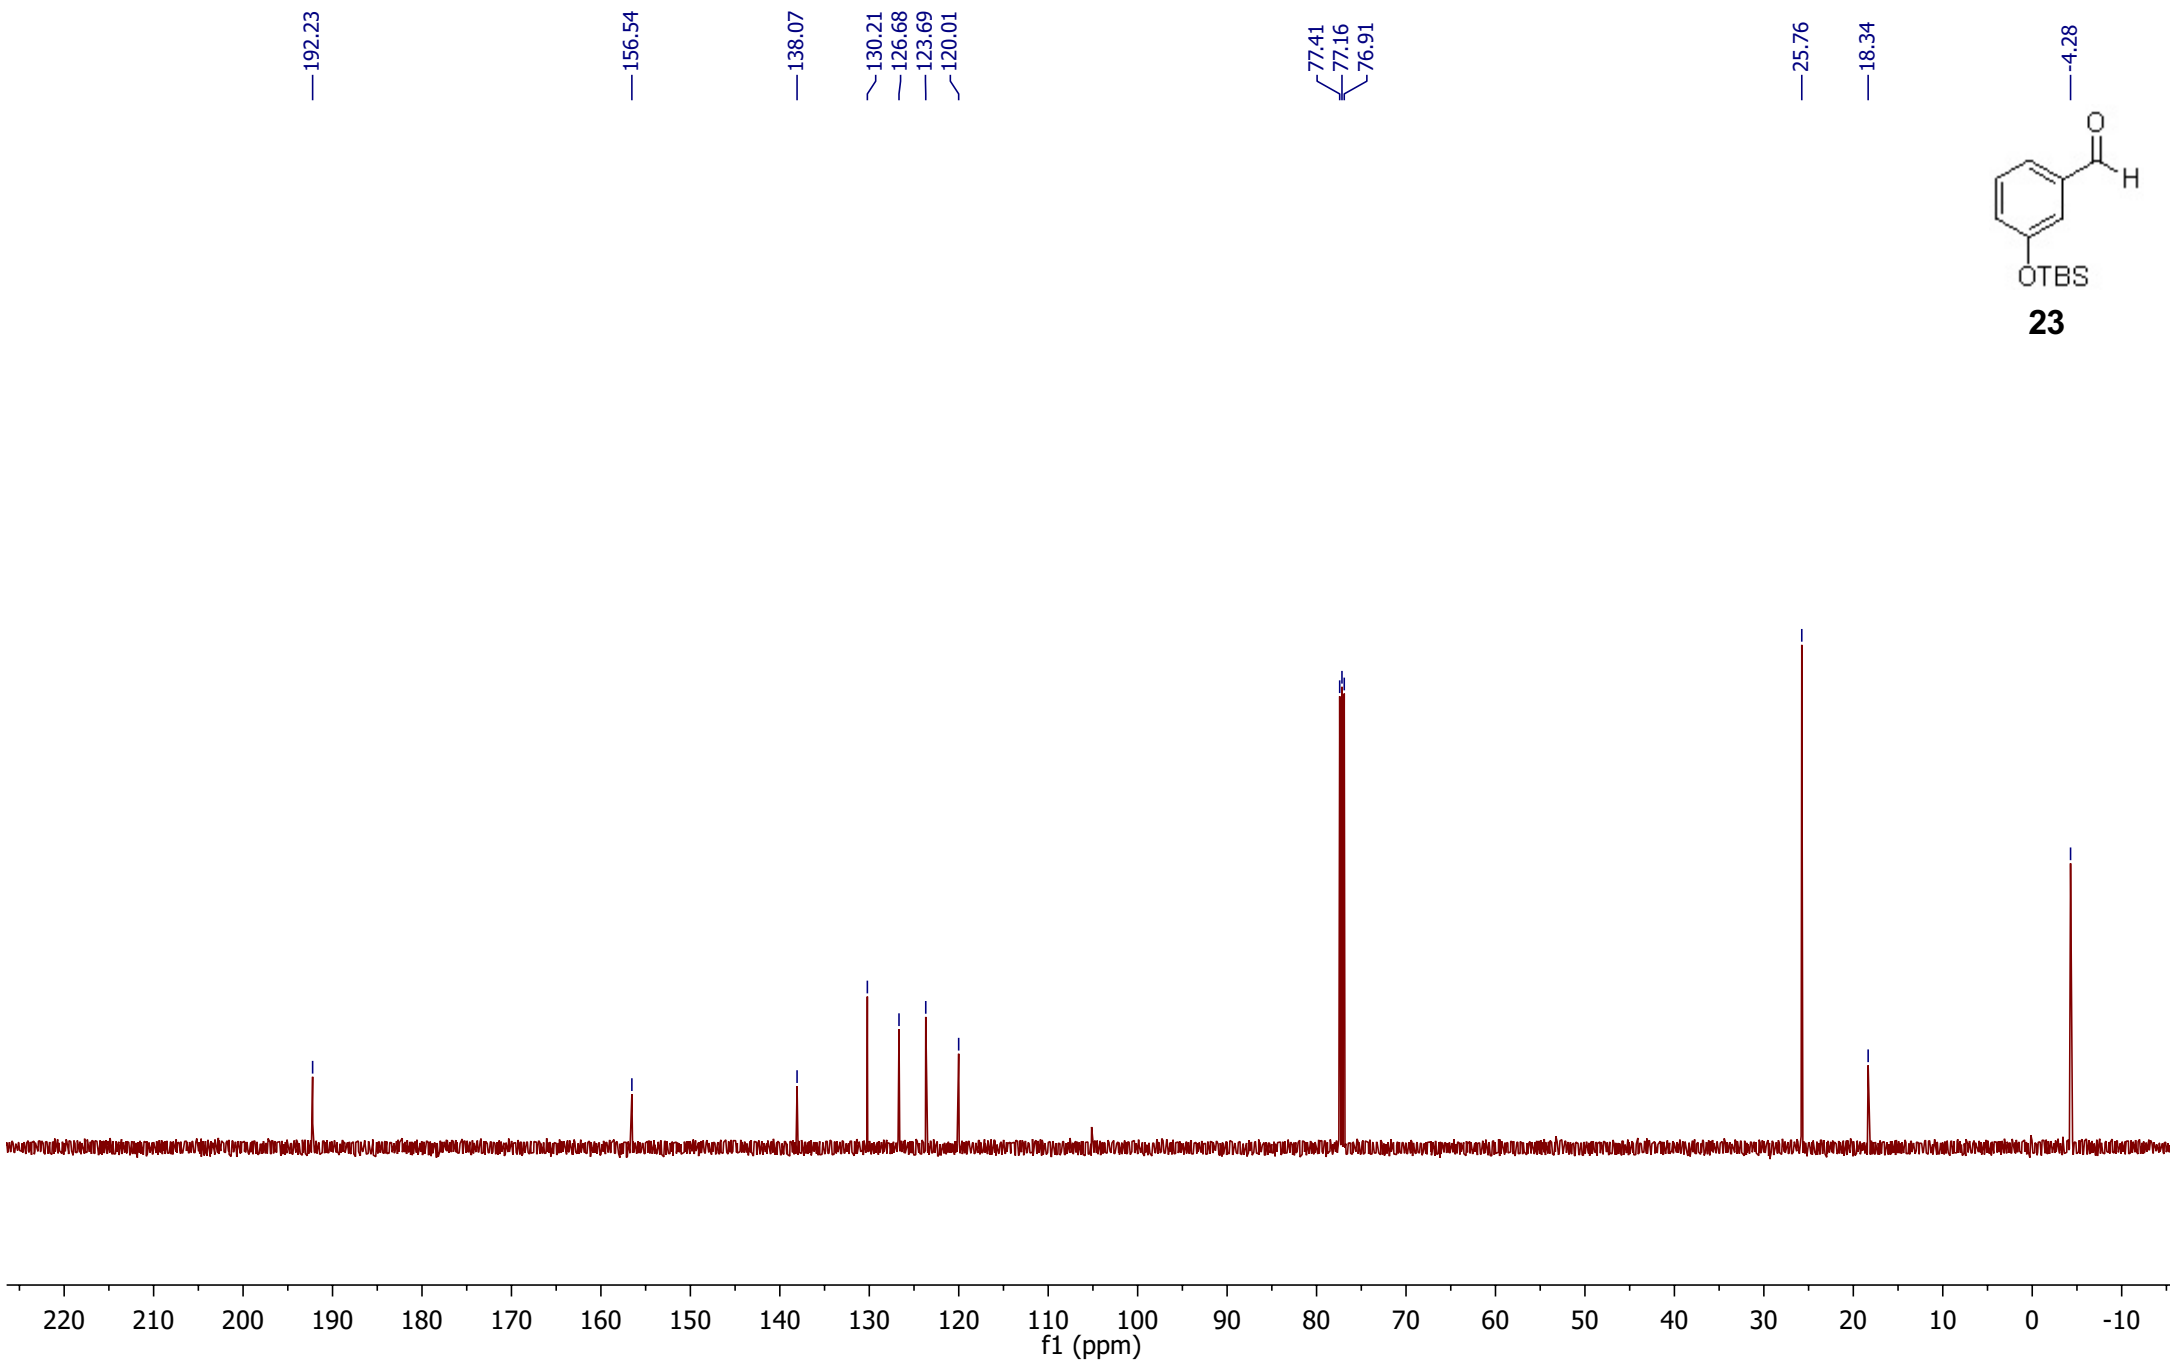

# HRMS (ESI) for Compound 23

C:\Xcalibur\...ENP\_IV\_46\_run2\_Orbi\_+ESI

12/30/2014 7:22:33 PM

ENP\_IV\_46\_run2\_Orbi\_+ESI #10 RT: 0.12 AV: 1 NL: 1.57E6  
T: FTMS + c ESI Full ms [150.00-500.00]

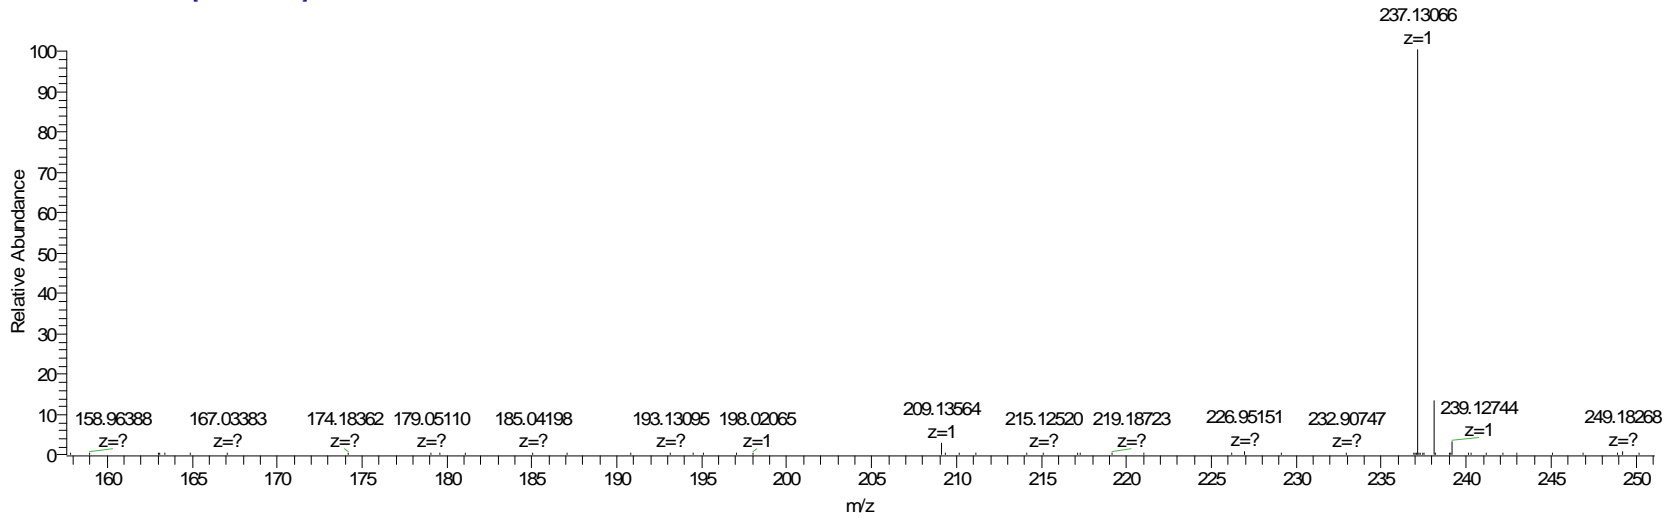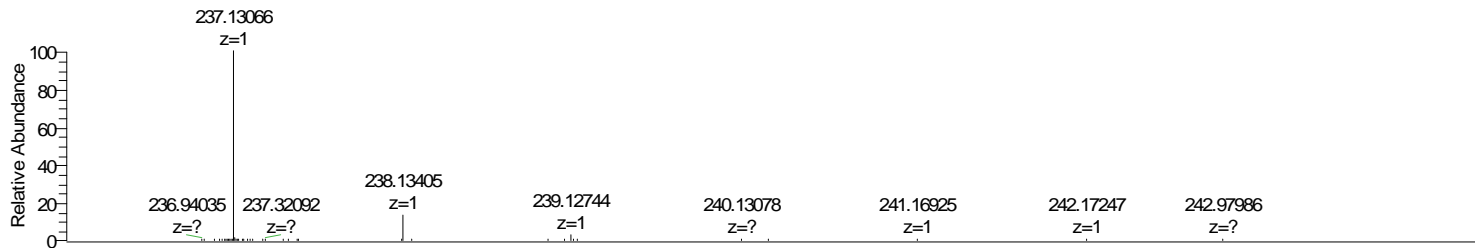

NL:  
1.57E6  
ENP\_IV\_46\_run2\_Orbi\_+ESI#10 RT: 0.12  
AV: 1 T: FTMS + c  
ESI Full ms  
[150.00-500.00]

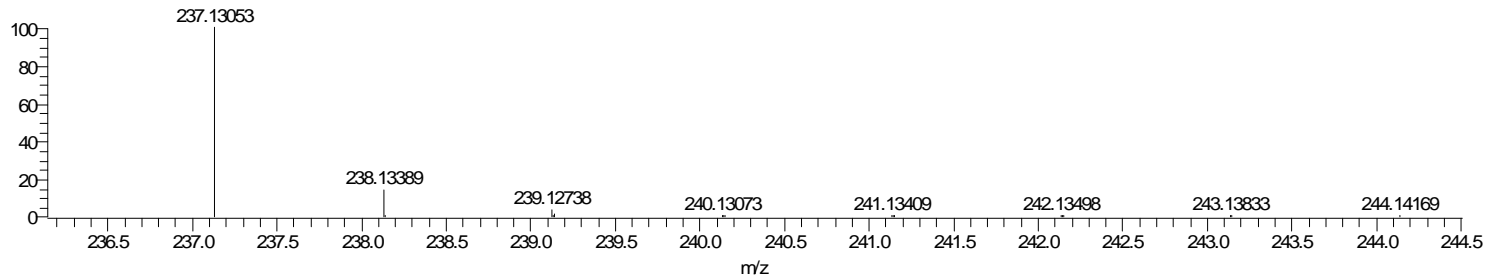

NL:  
7.96E5  
C18H20O2Si+H  
C18H21O2Si1  
pa Chrg 1



<sup>1</sup>H NMR (500 MHz, CDCl<sub>3</sub>) of Compound **24**

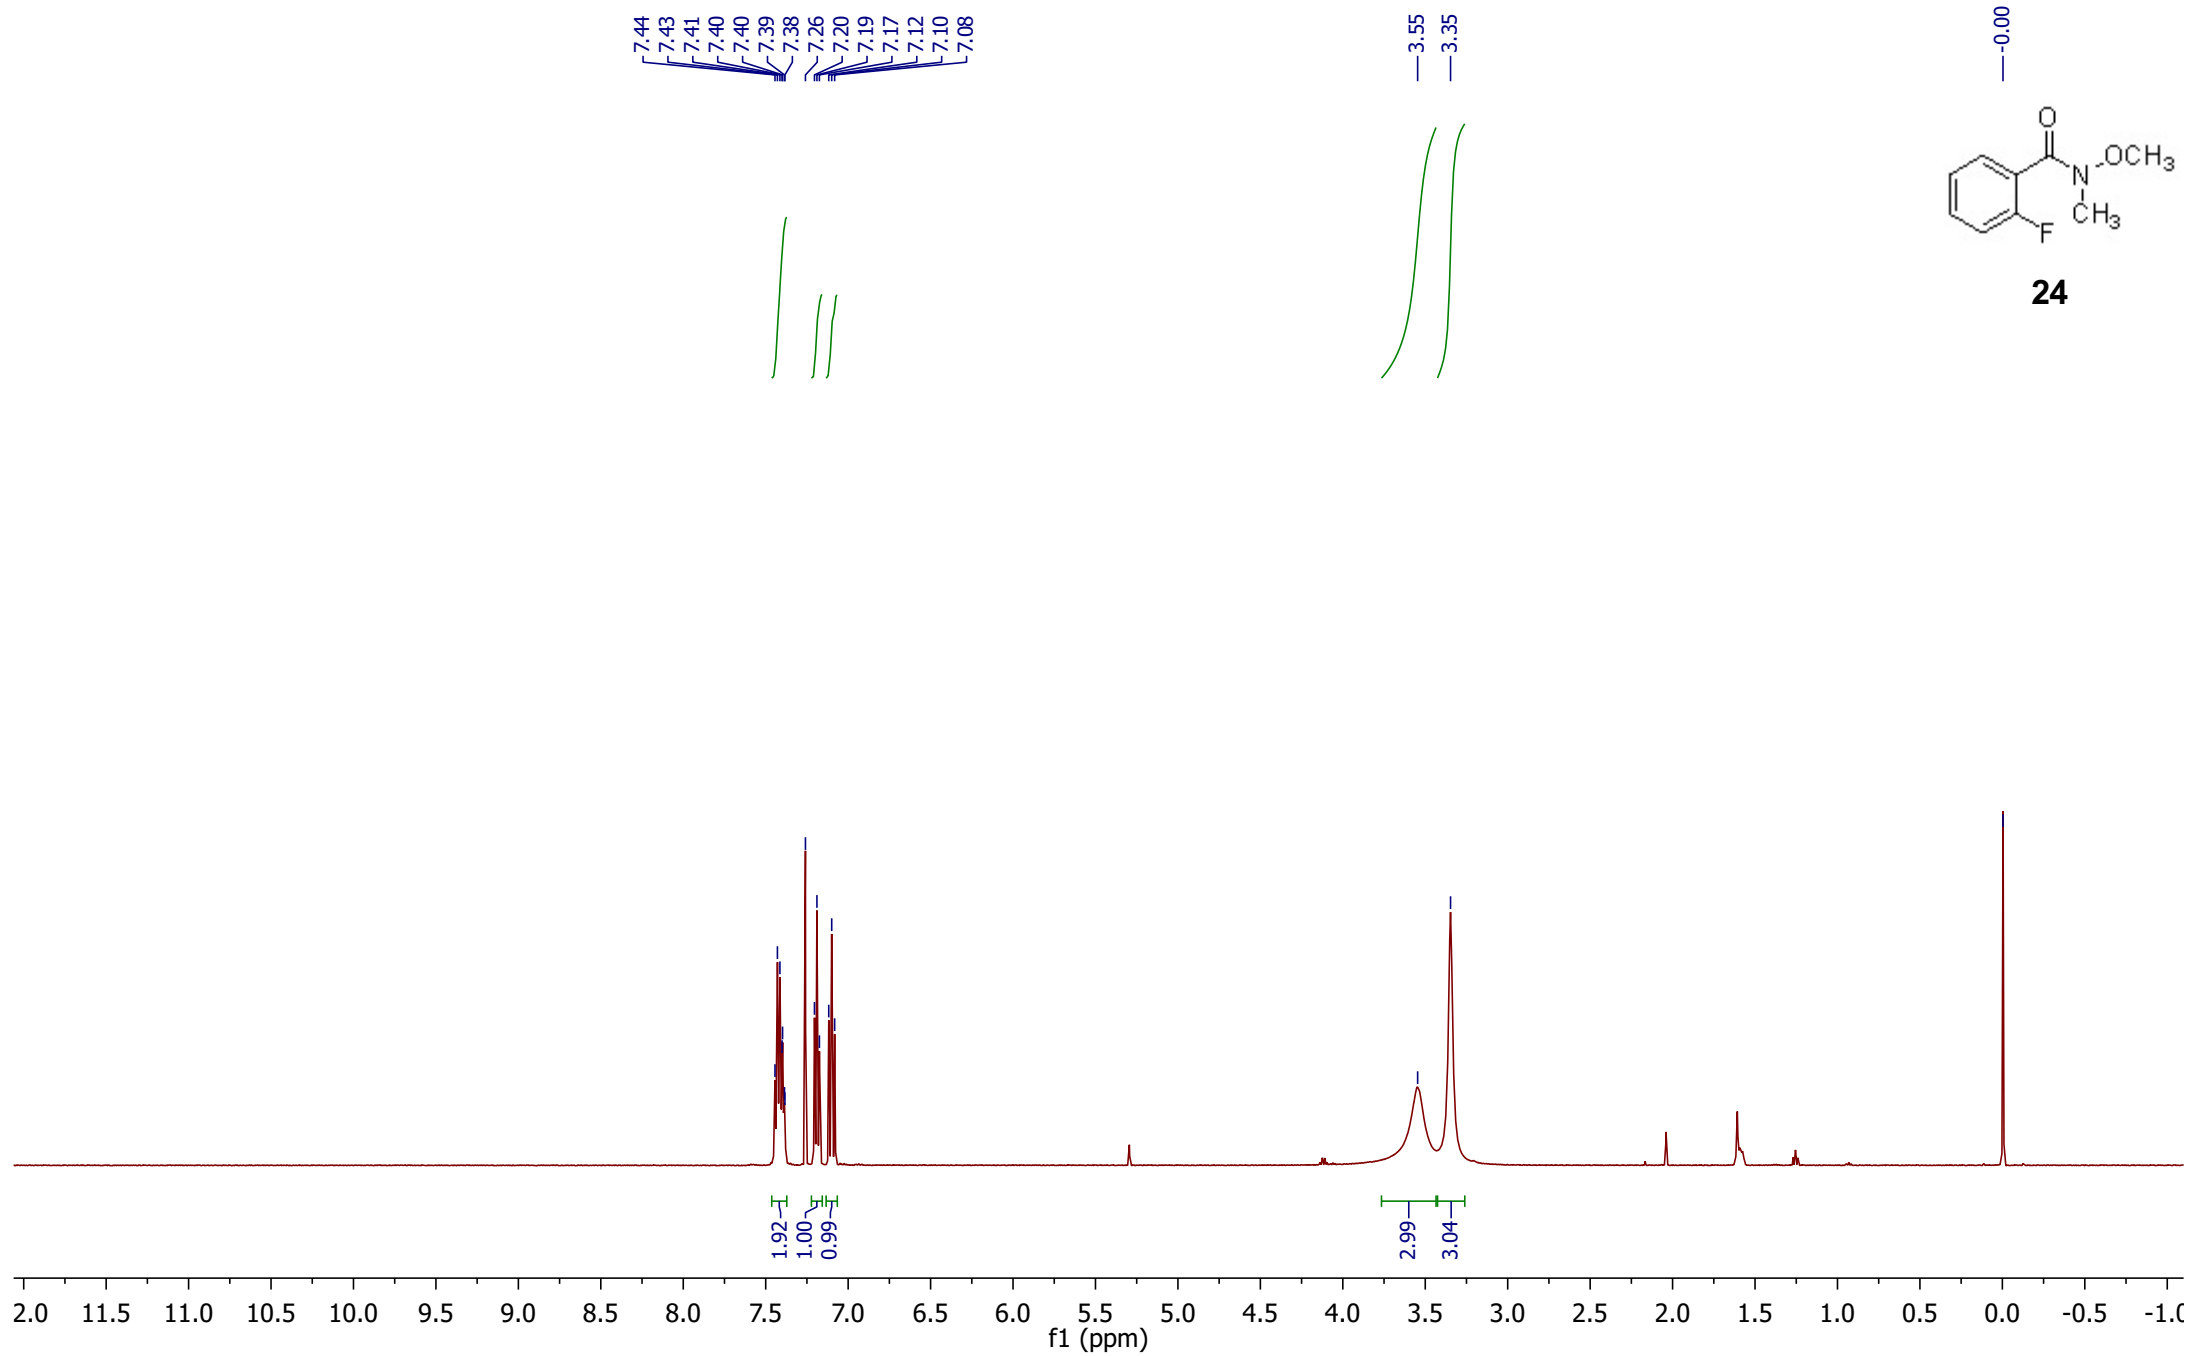

<sup>1</sup>C NMR (125 MHz, CDCl<sub>3</sub>) of Compound **24**

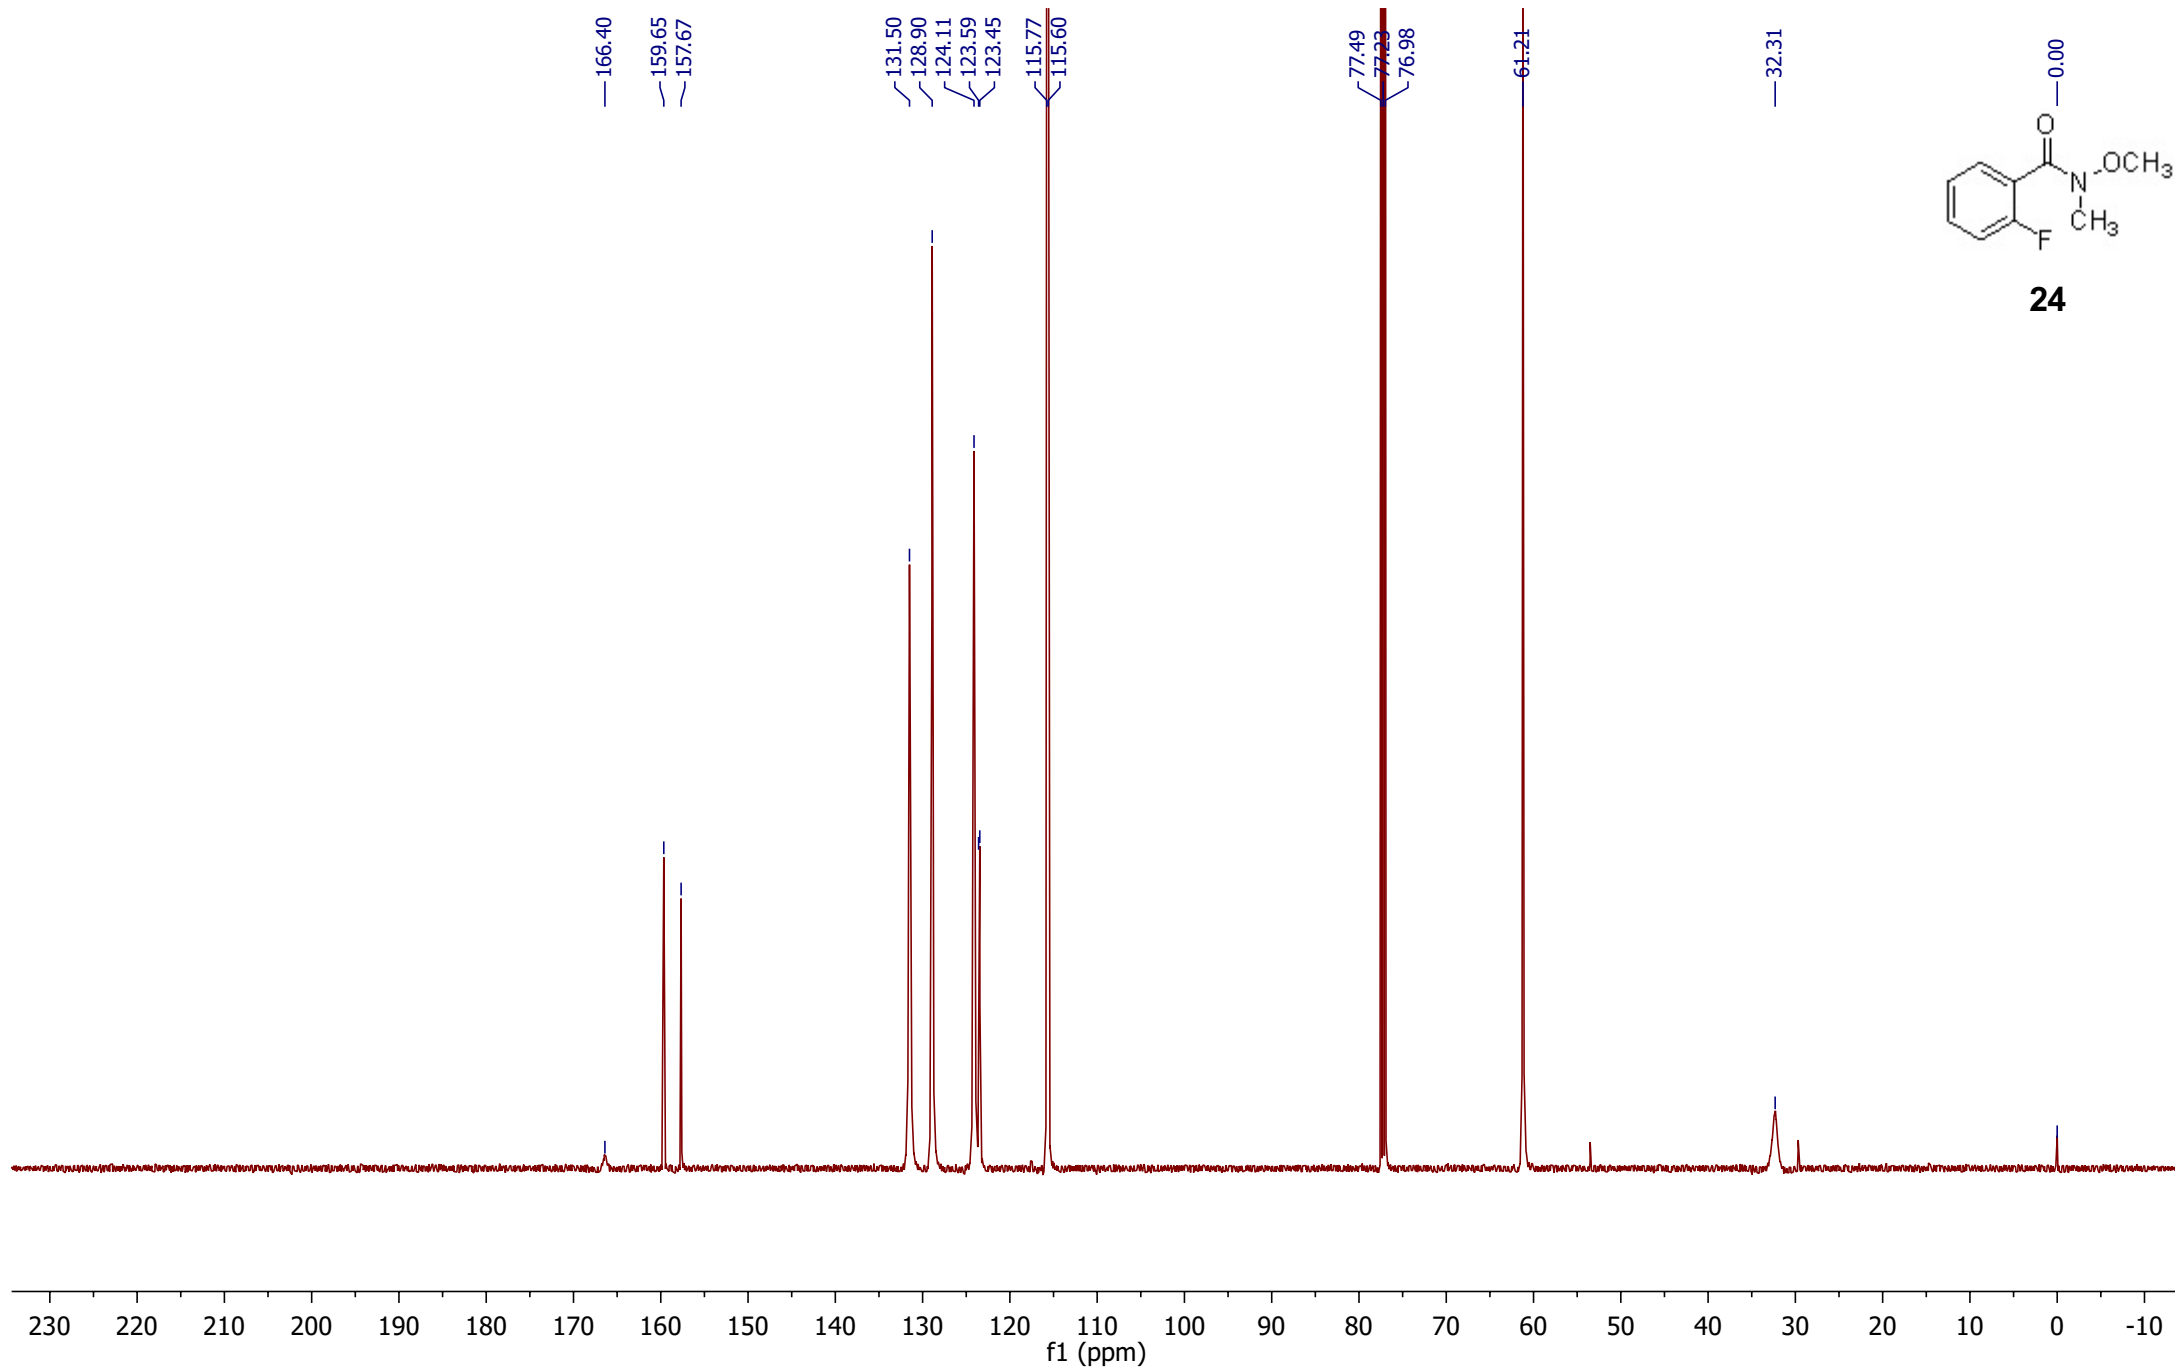

$^{19}\text{F}$  NMR (470 MHz,  $\text{CDCl}_3$ ) of Compound **24**

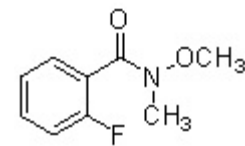

**24**

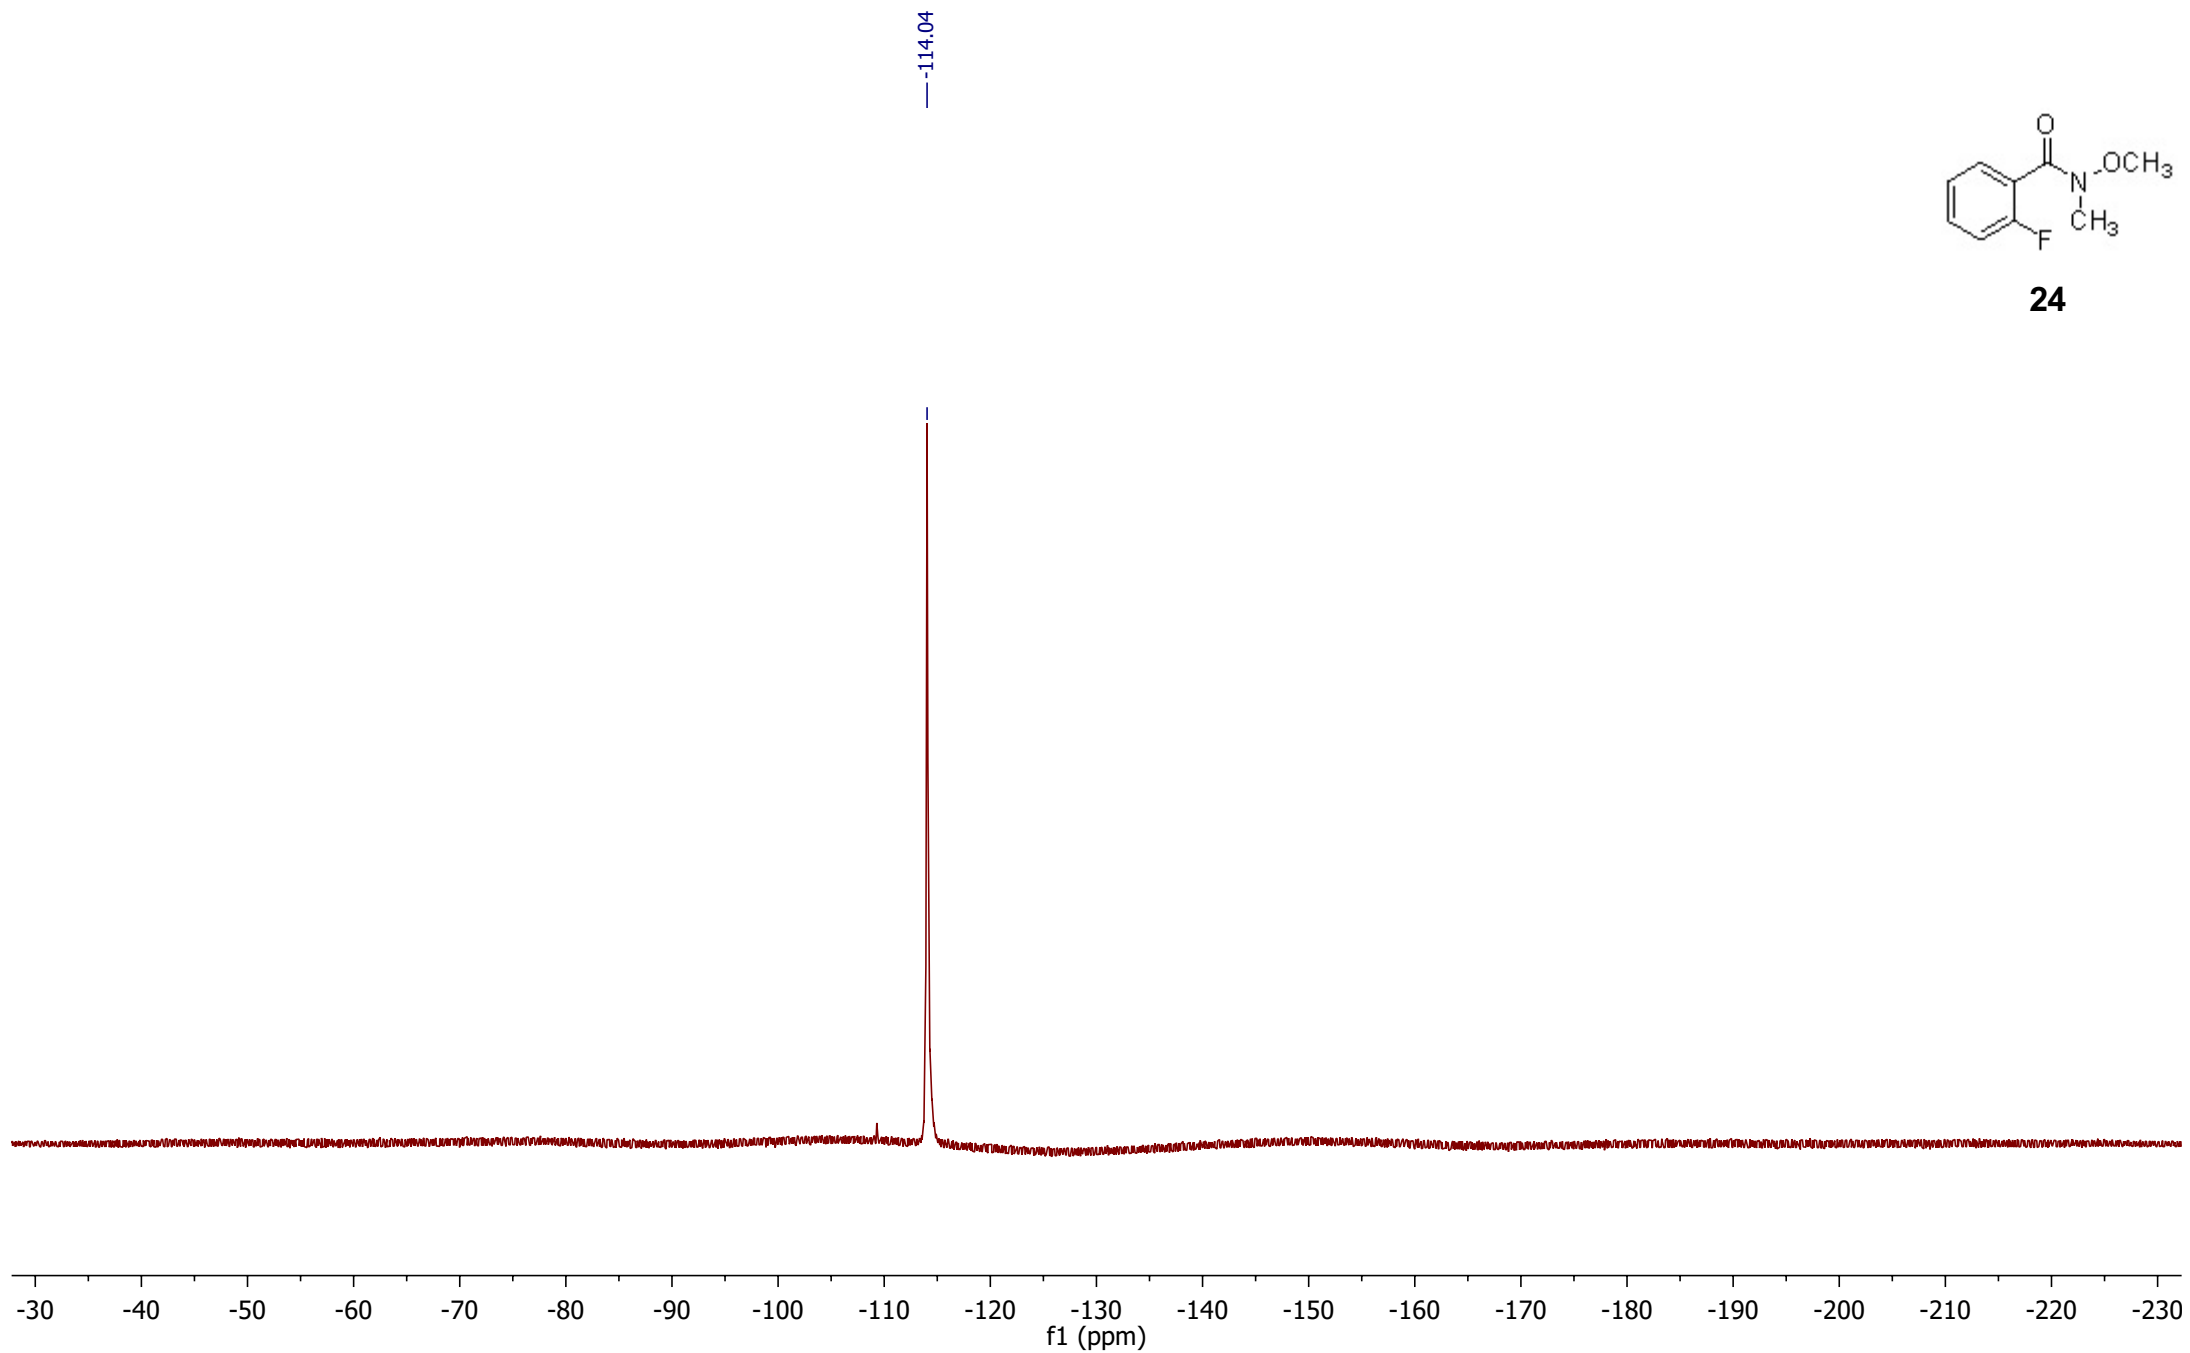

# HRMS (ESI) for Compound 24

C:\Xcalibur...Erica\12-19-14\ENP\_IV\_76

12/19/2014 10:37:50 AM

ENP\_IV\_76 #77-89 RT: 1.22-1.33 AV: 13 NL: 8.17E8  
T: FTMS + p ESI Full ms [100.00-700.00]

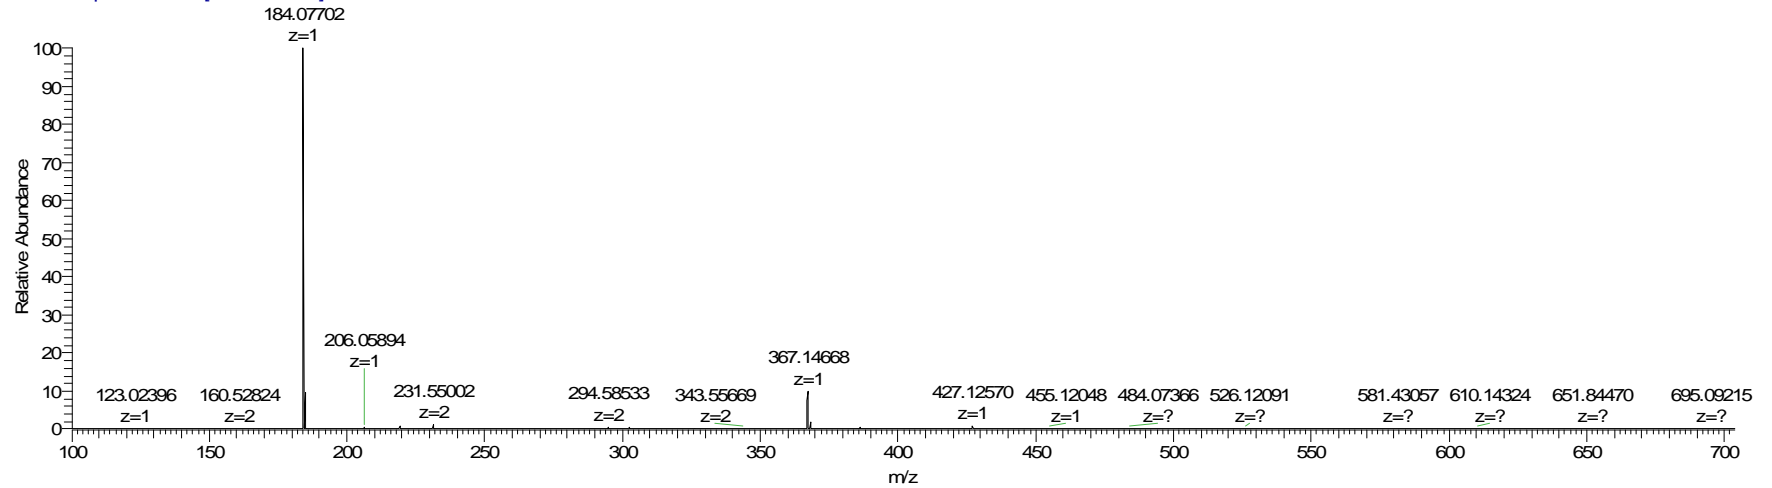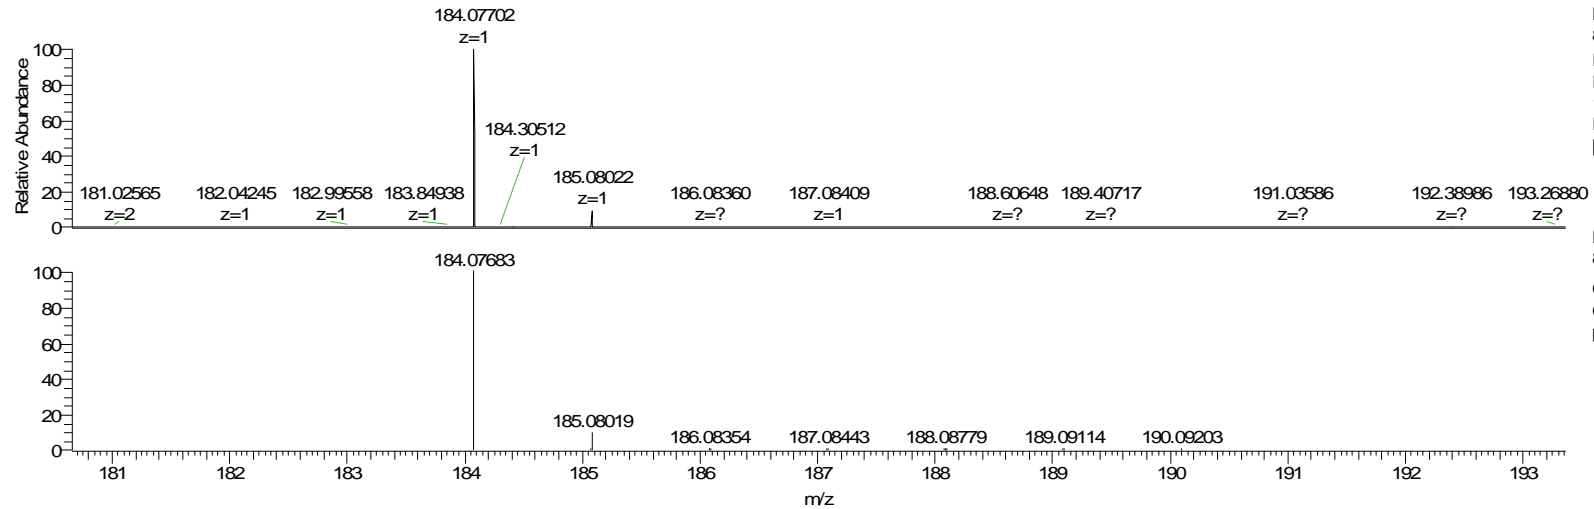

NL:  
8.17E8  
ENP\_IV\_76#77-89  
RT: 1.22-1.33 AV:  
13 T: FTMS + p ESI  
Full ms  
[100.00-700.00]

NL:  
8.99E5  
C<sub>9</sub>H<sub>10</sub>FNO<sub>2</sub>+H  
C<sub>9</sub>H<sub>11</sub>F<sub>1</sub>N<sub>1</sub>O<sub>2</sub>  
pa Chrg 1

<sup>1</sup>H NMR (500 MHz, CDCl<sub>3</sub>) of Compound **25**

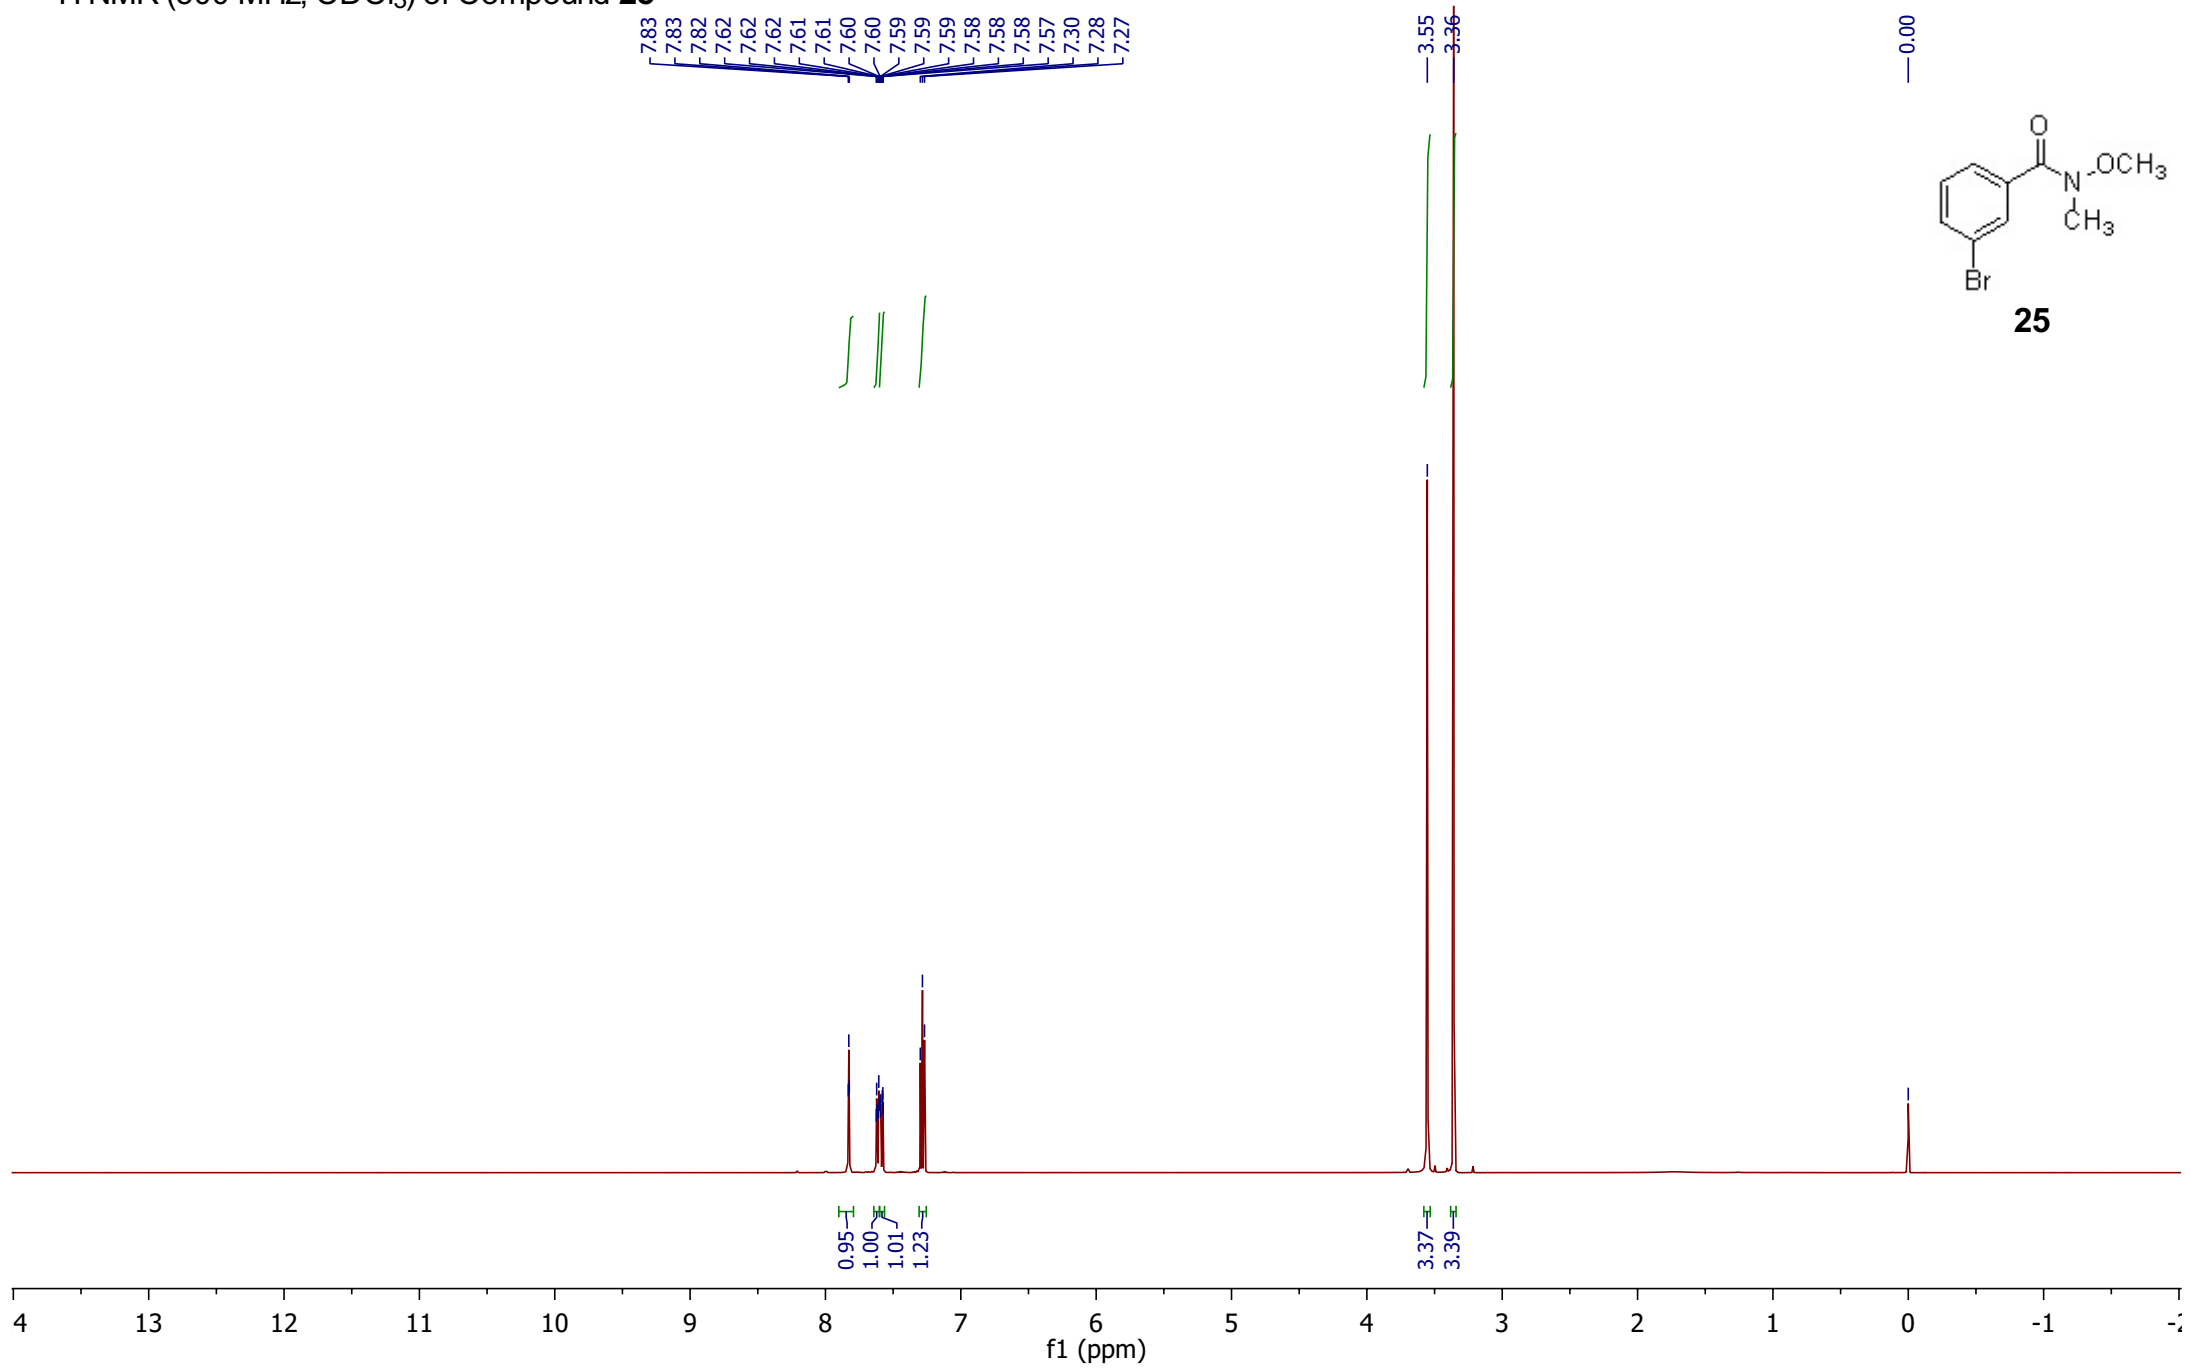

$^{13}\text{C}$  NMR (125 MHz,  $\text{CDCl}_3$ ) of Compound **25**

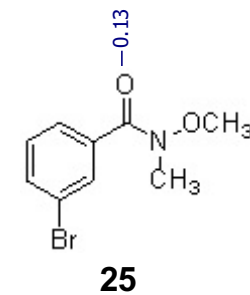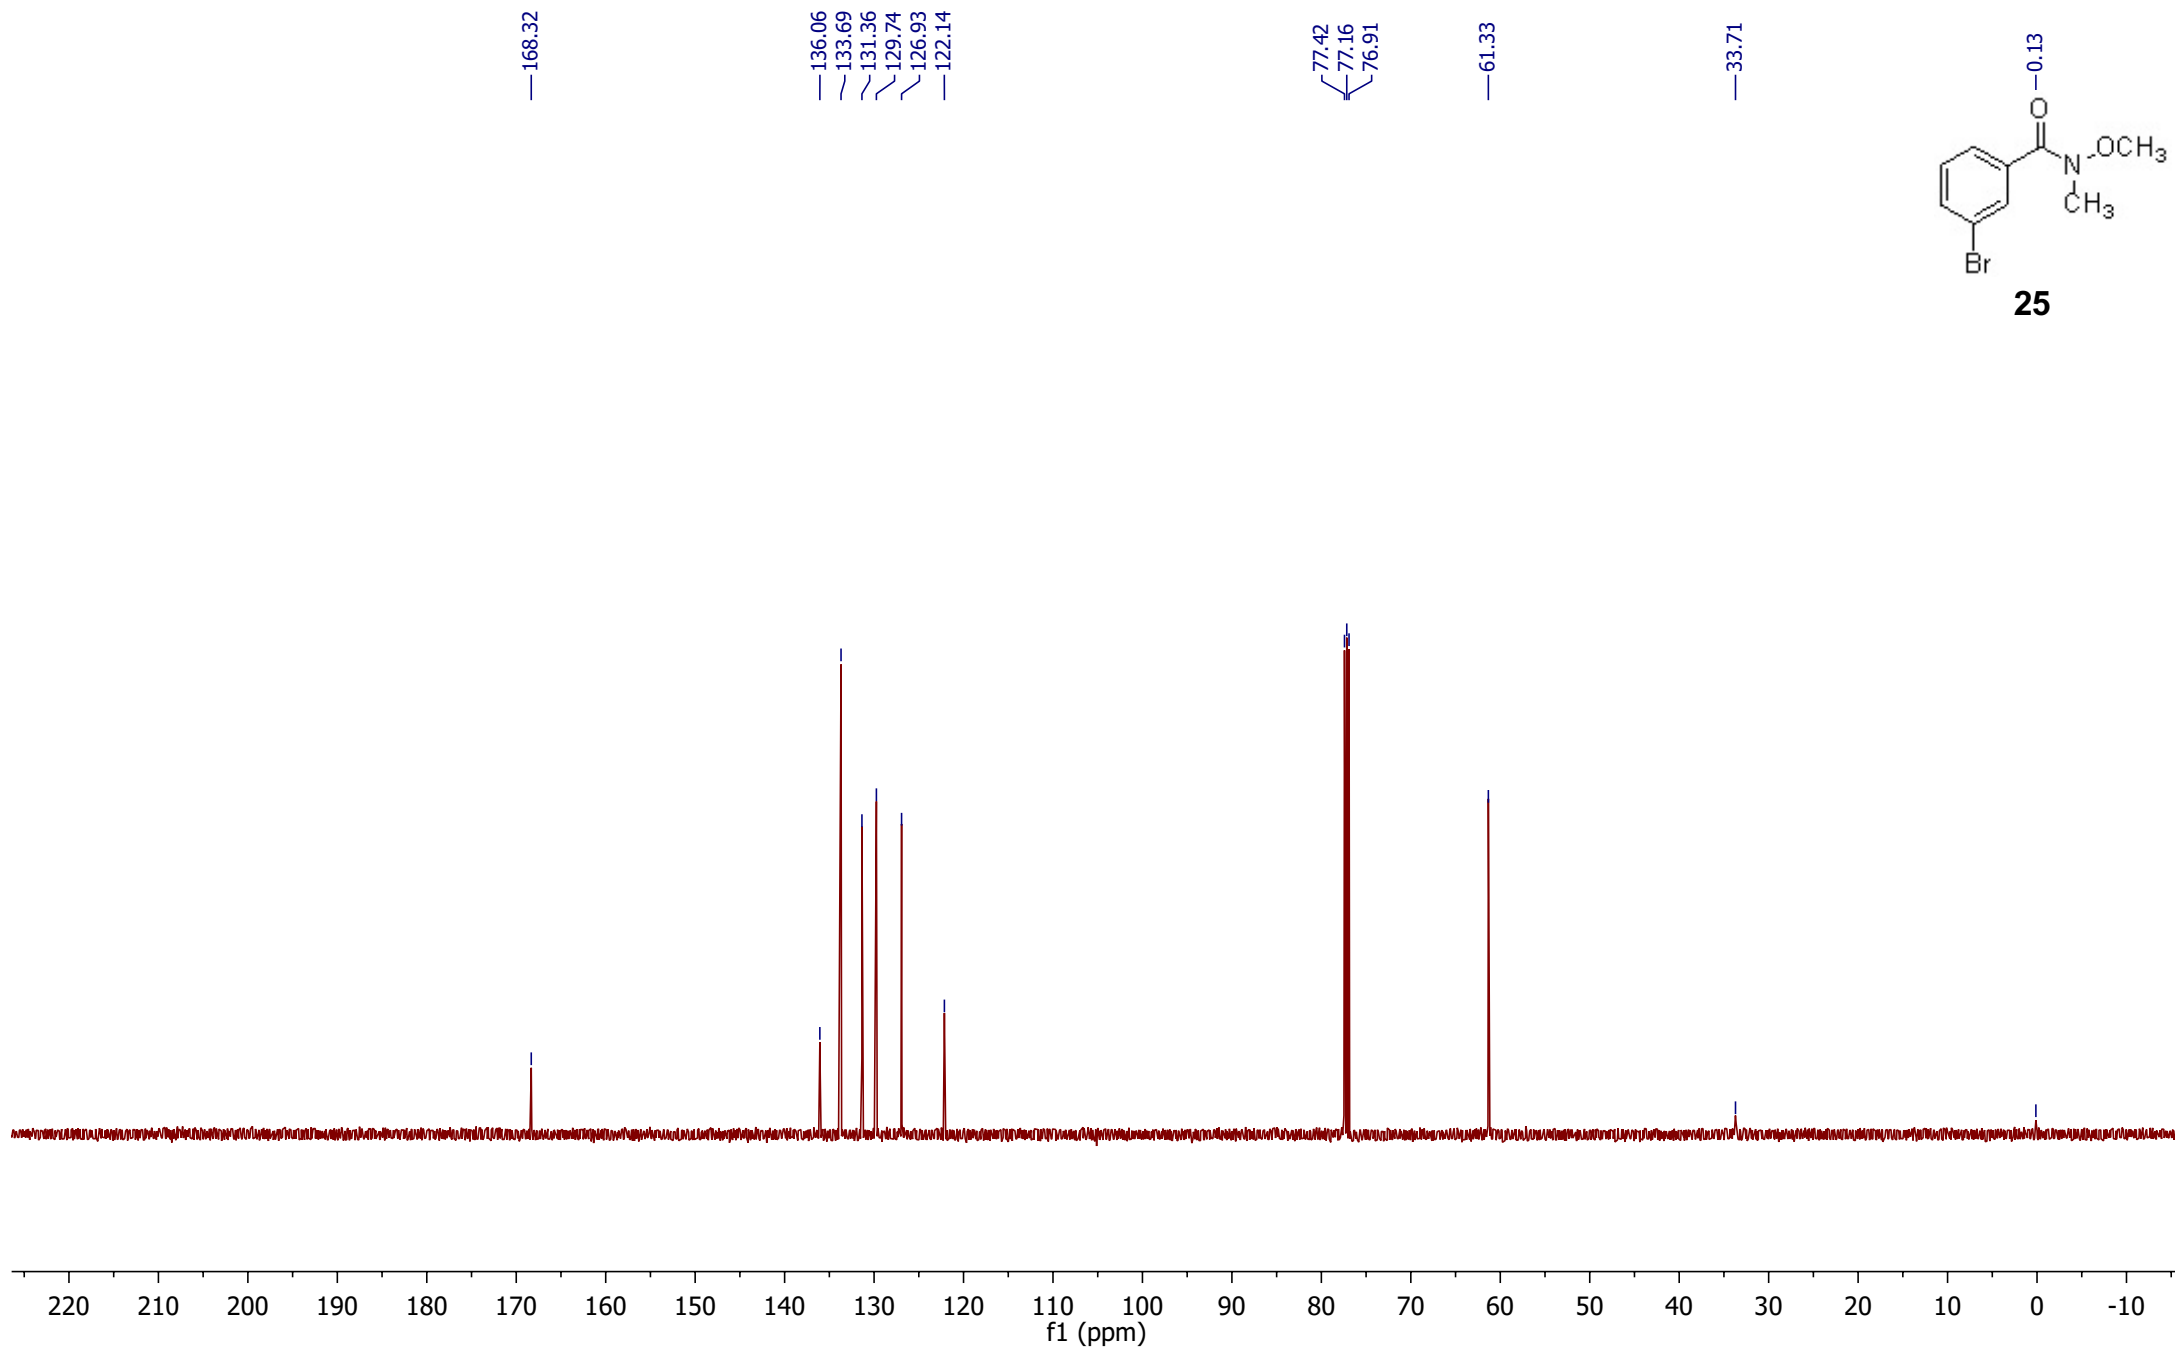

# HRMS (ESI) for Compound 25

C:\Xcalibur...\Erica\12-19-14\ENP\_V\_36

12/19/2014 12:45:21 PM

ENP\_V\_36 #100-109 RT: 1.38-1.47 AV: 10 NL: 4.06E8  
T: FTMS + p ESI Full ms [100.00-700.00]

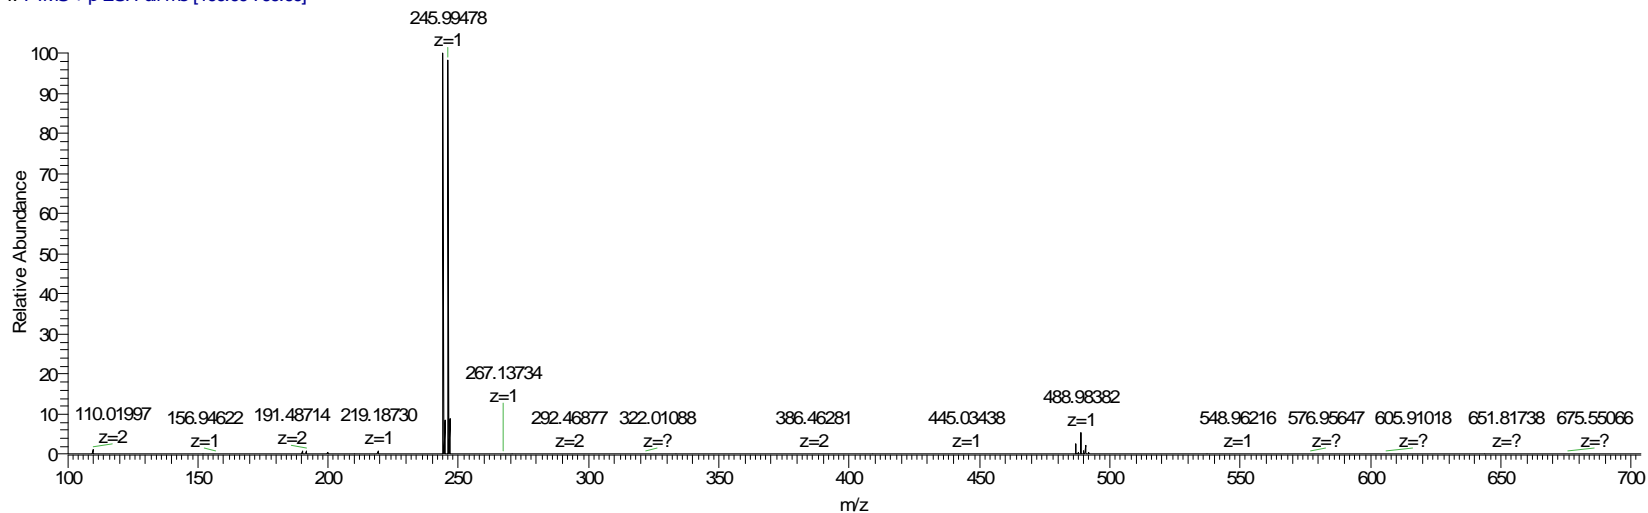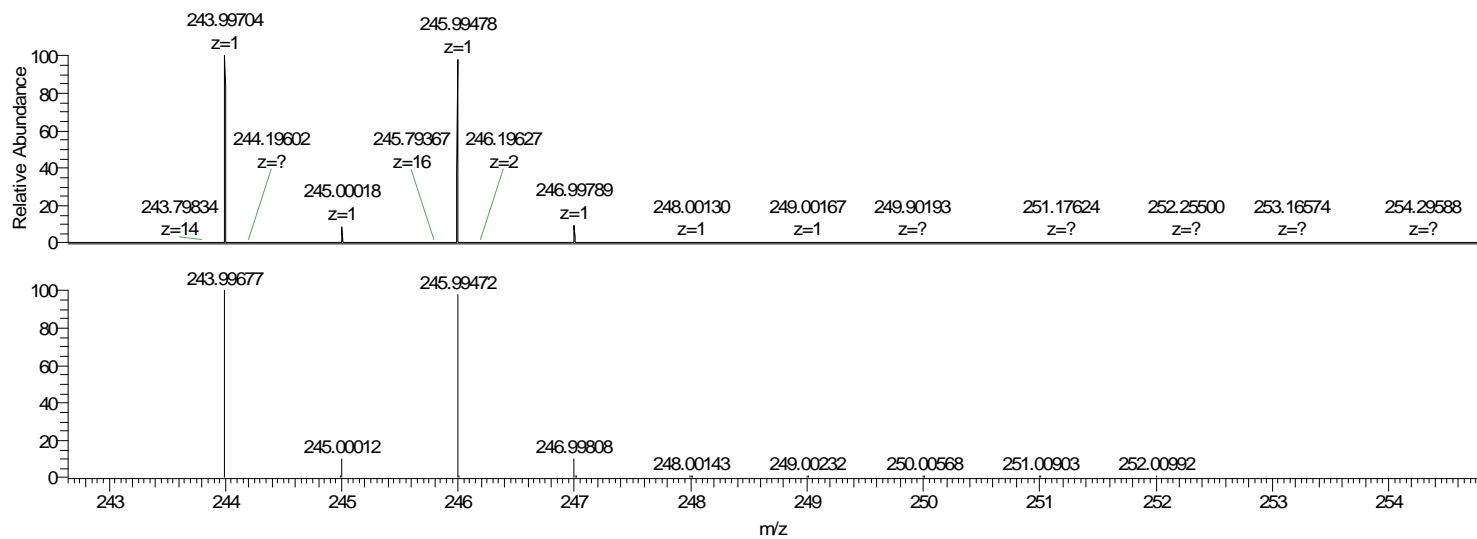

NL:  
4.06E8  
ENP\_V\_36#100-109  
RT: 1.38-1.47 AV:  
10 T: FTMS + p ESI  
Full ms  
[100.00-700.00]

NL:  
4.56E5  
C9H10BrNO2 + H  
C9H11Br1N1O2  
pa Chrg 1

<sup>1</sup>H NMR (600 MHz, CDCl<sub>3</sub>) of Compound **26**

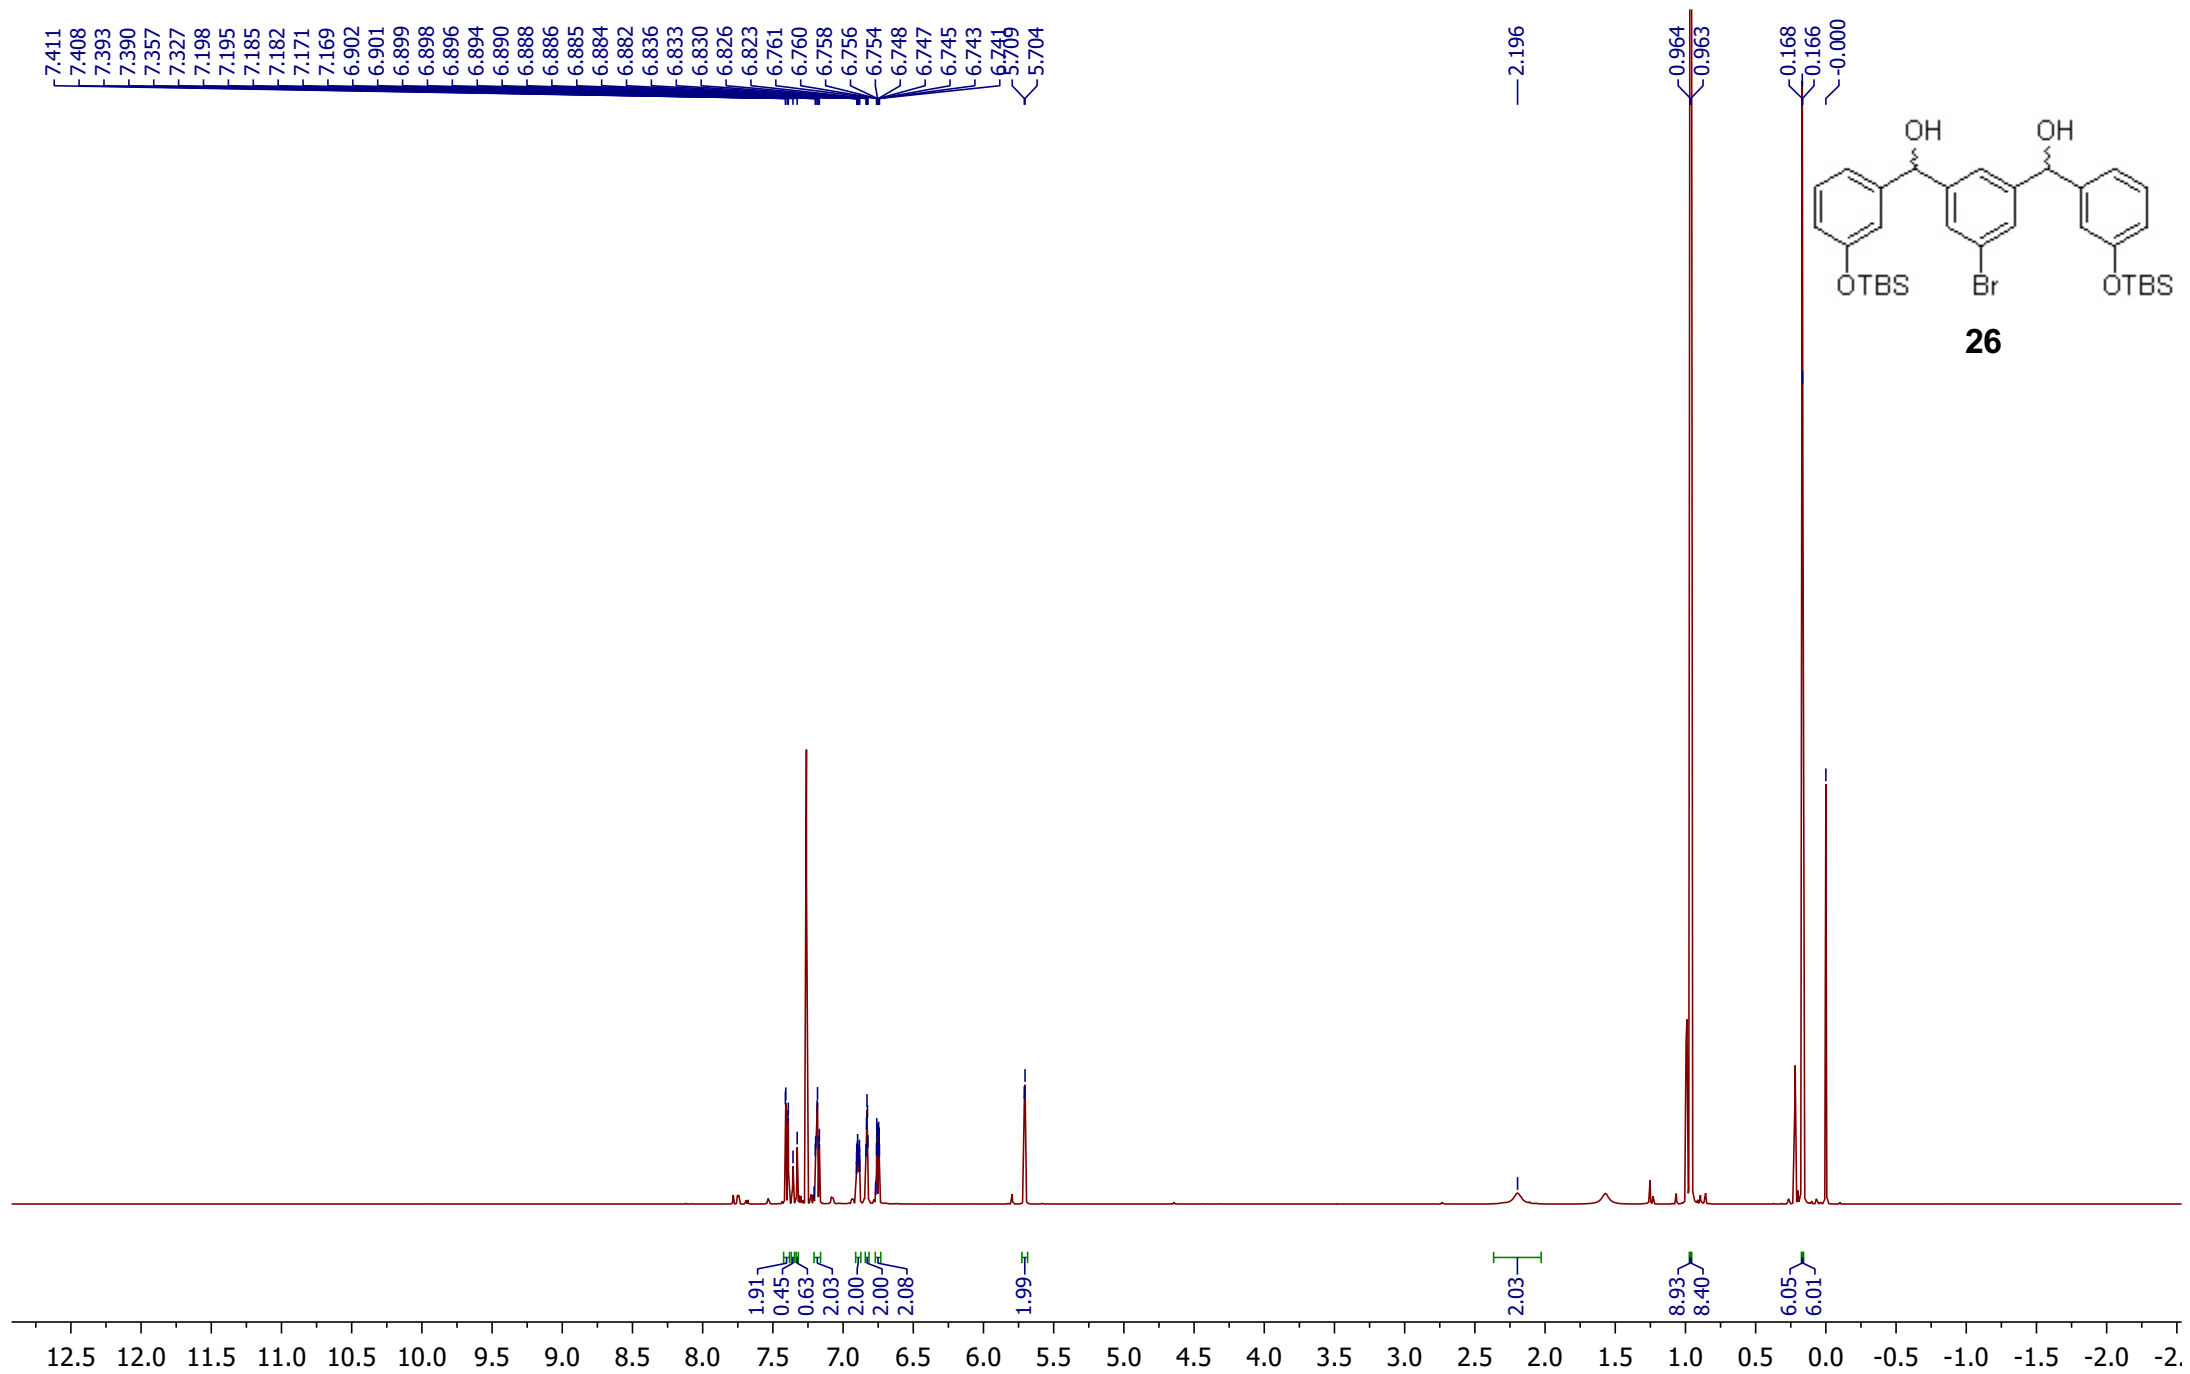



<sup>13</sup>C NMR (150 MHz, CDCl<sub>3</sub>) of Compound **26**

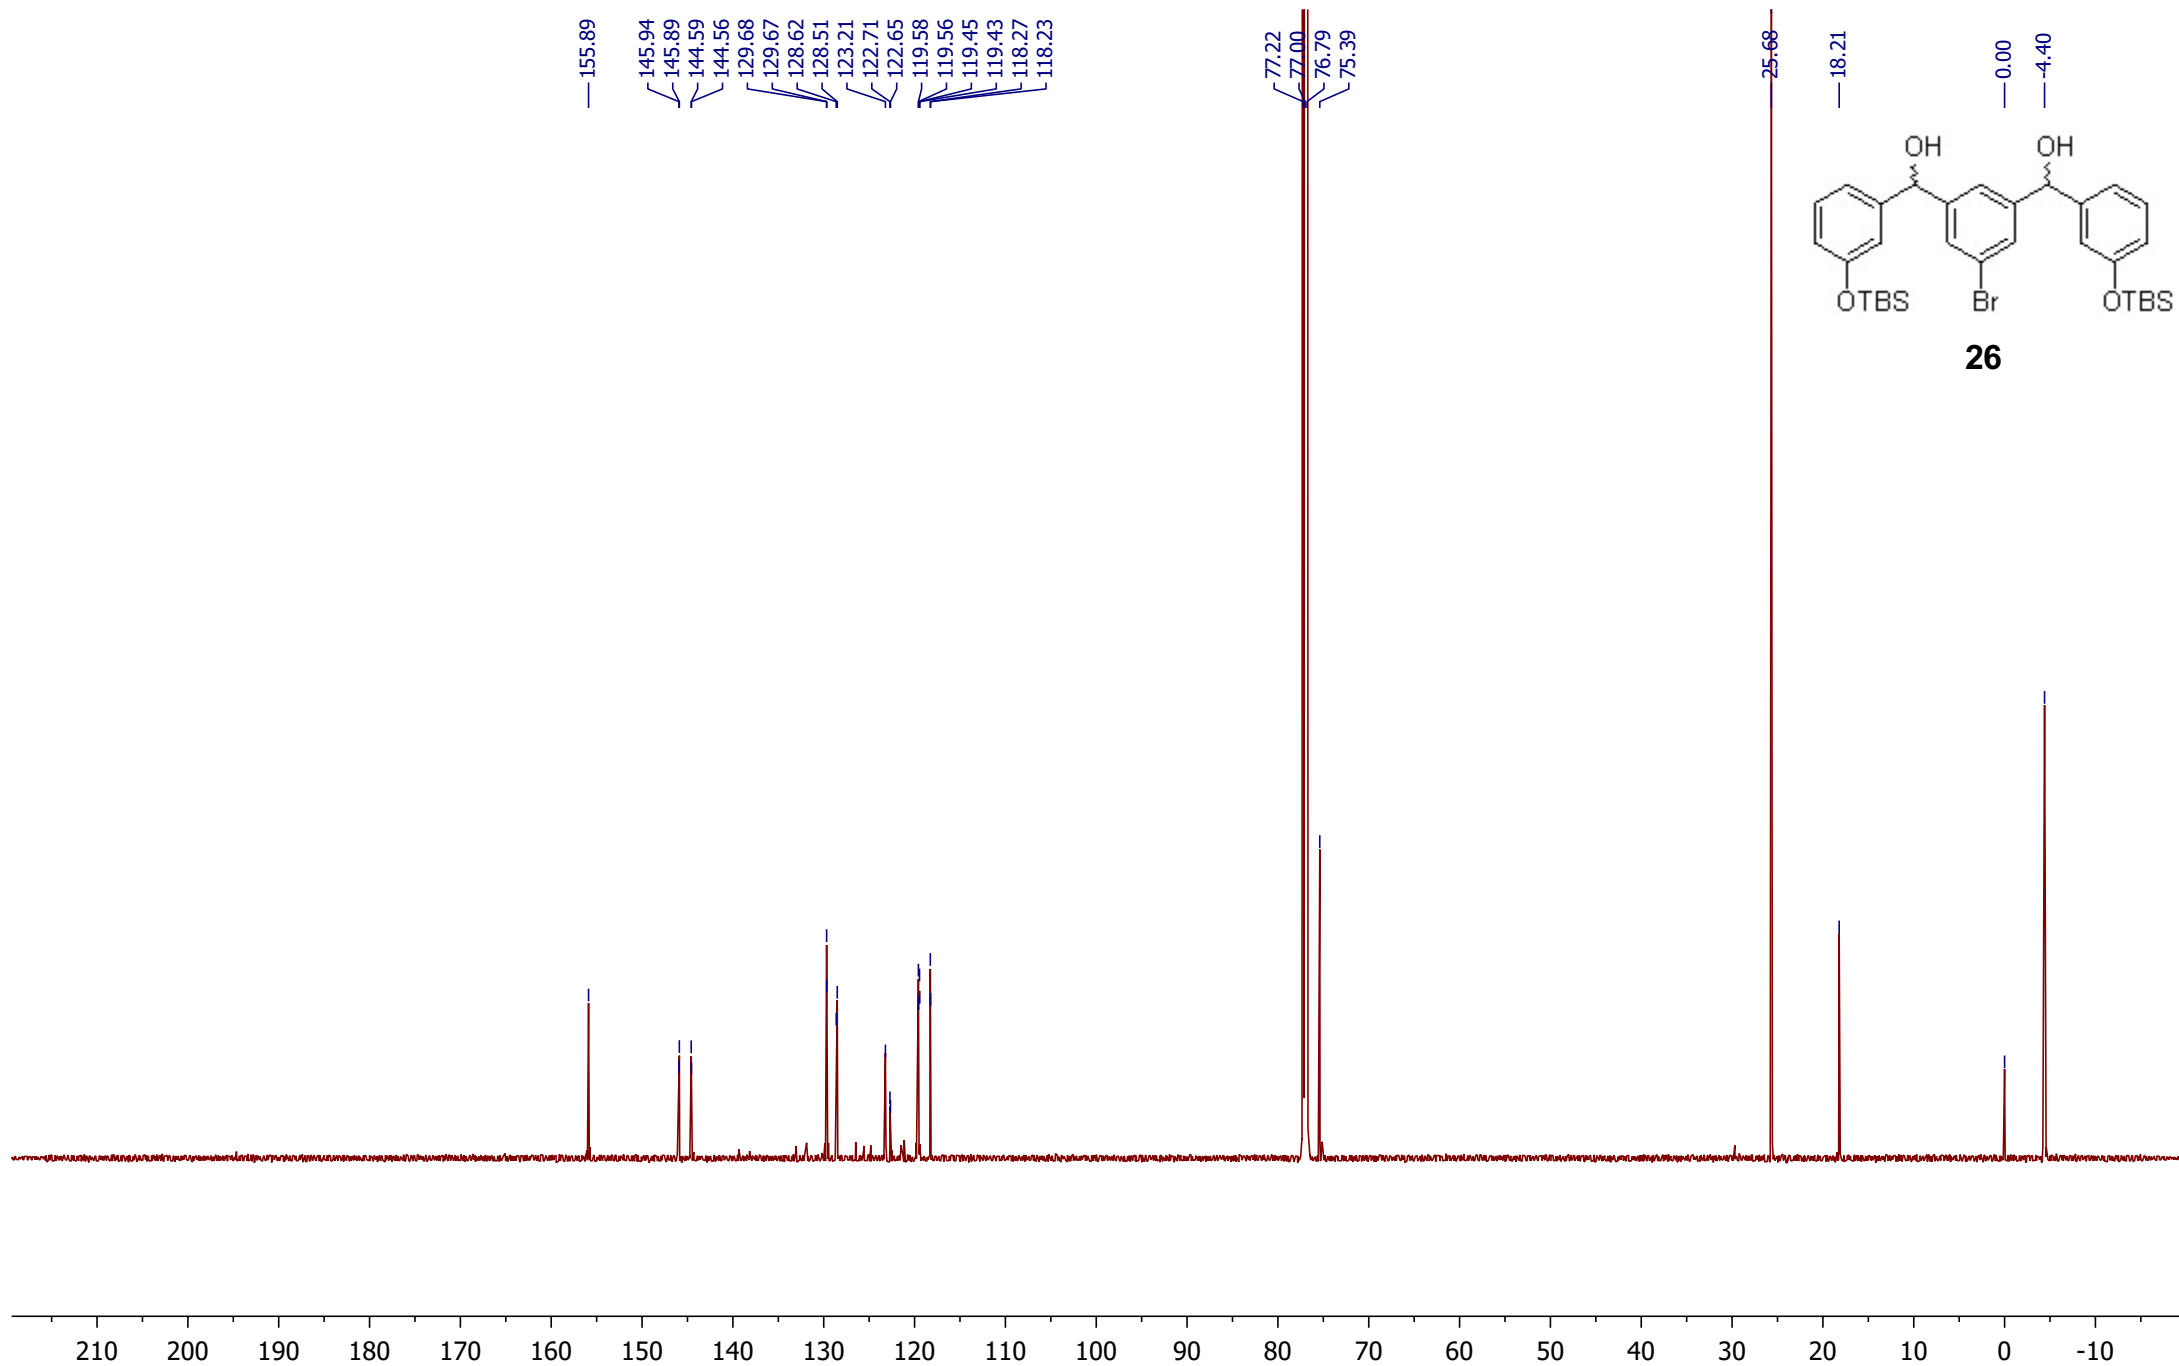

# HRMS (ESI) for Compound 26

ENP\_IV\_83b\_run2\_zoom\_Orbi\_+ESI

12/30/2014 9:48:09 PM

ENP\_IV\_83b\_run2\_zoom\_Orbi\_+ESI #10 RT: 0.10 AV: 1 NL: 2.56E7  
T: FTMS + c ESI Full ms [100.00-1000.00]

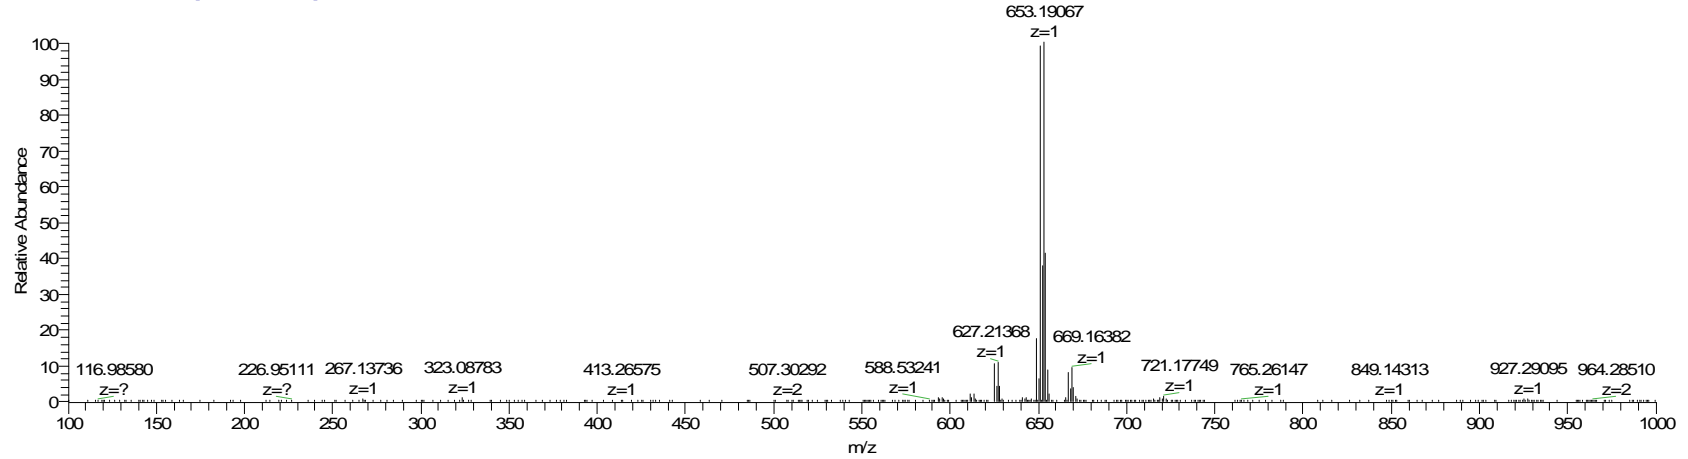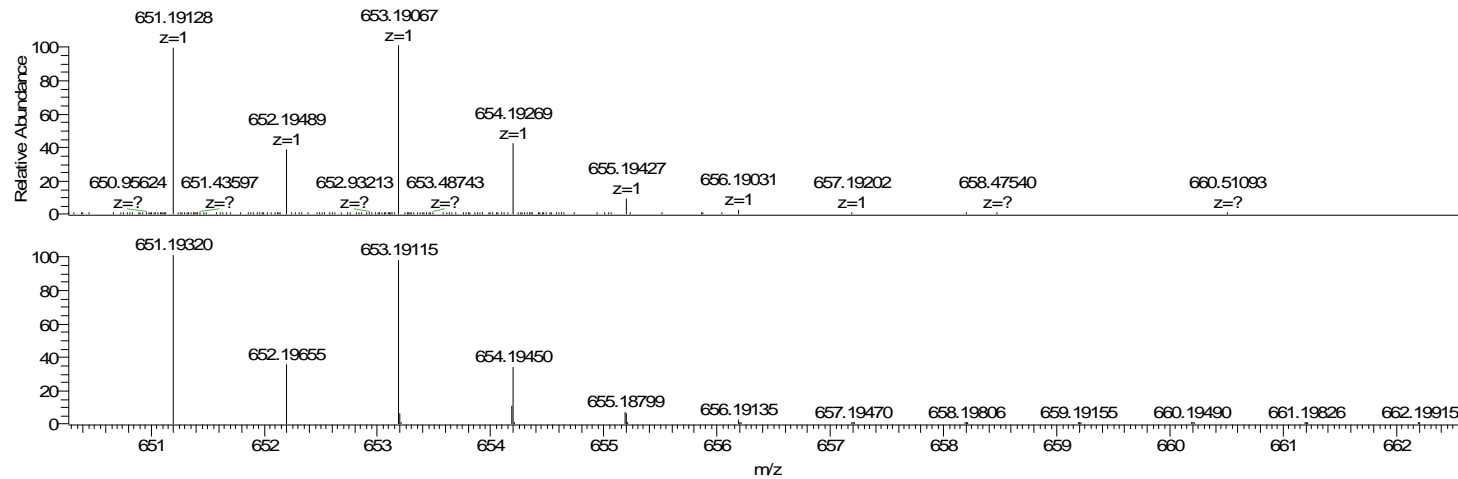

NL:  
2.56E7  
ENP\_IV\_83b\_run2\_zoom  
\_Orbi\_+ESI#10 RT:  
0.10 AV: 1 T: FTMS + c  
ESI Full ms  
[100.00-1000.00]

NL:  
3.01E5  
C<sub>32</sub>H<sub>45</sub>BrO<sub>4</sub>Si<sub>2</sub>+Na:  
C<sub>32</sub>H<sub>45</sub>Br<sub>1</sub>O<sub>4</sub>Si<sub>2</sub>Na<sub>1</sub>  
pa Chrg 1

<sup>1</sup>H NMR (500 MHz, CDCl<sub>3</sub>) for Compound **27**

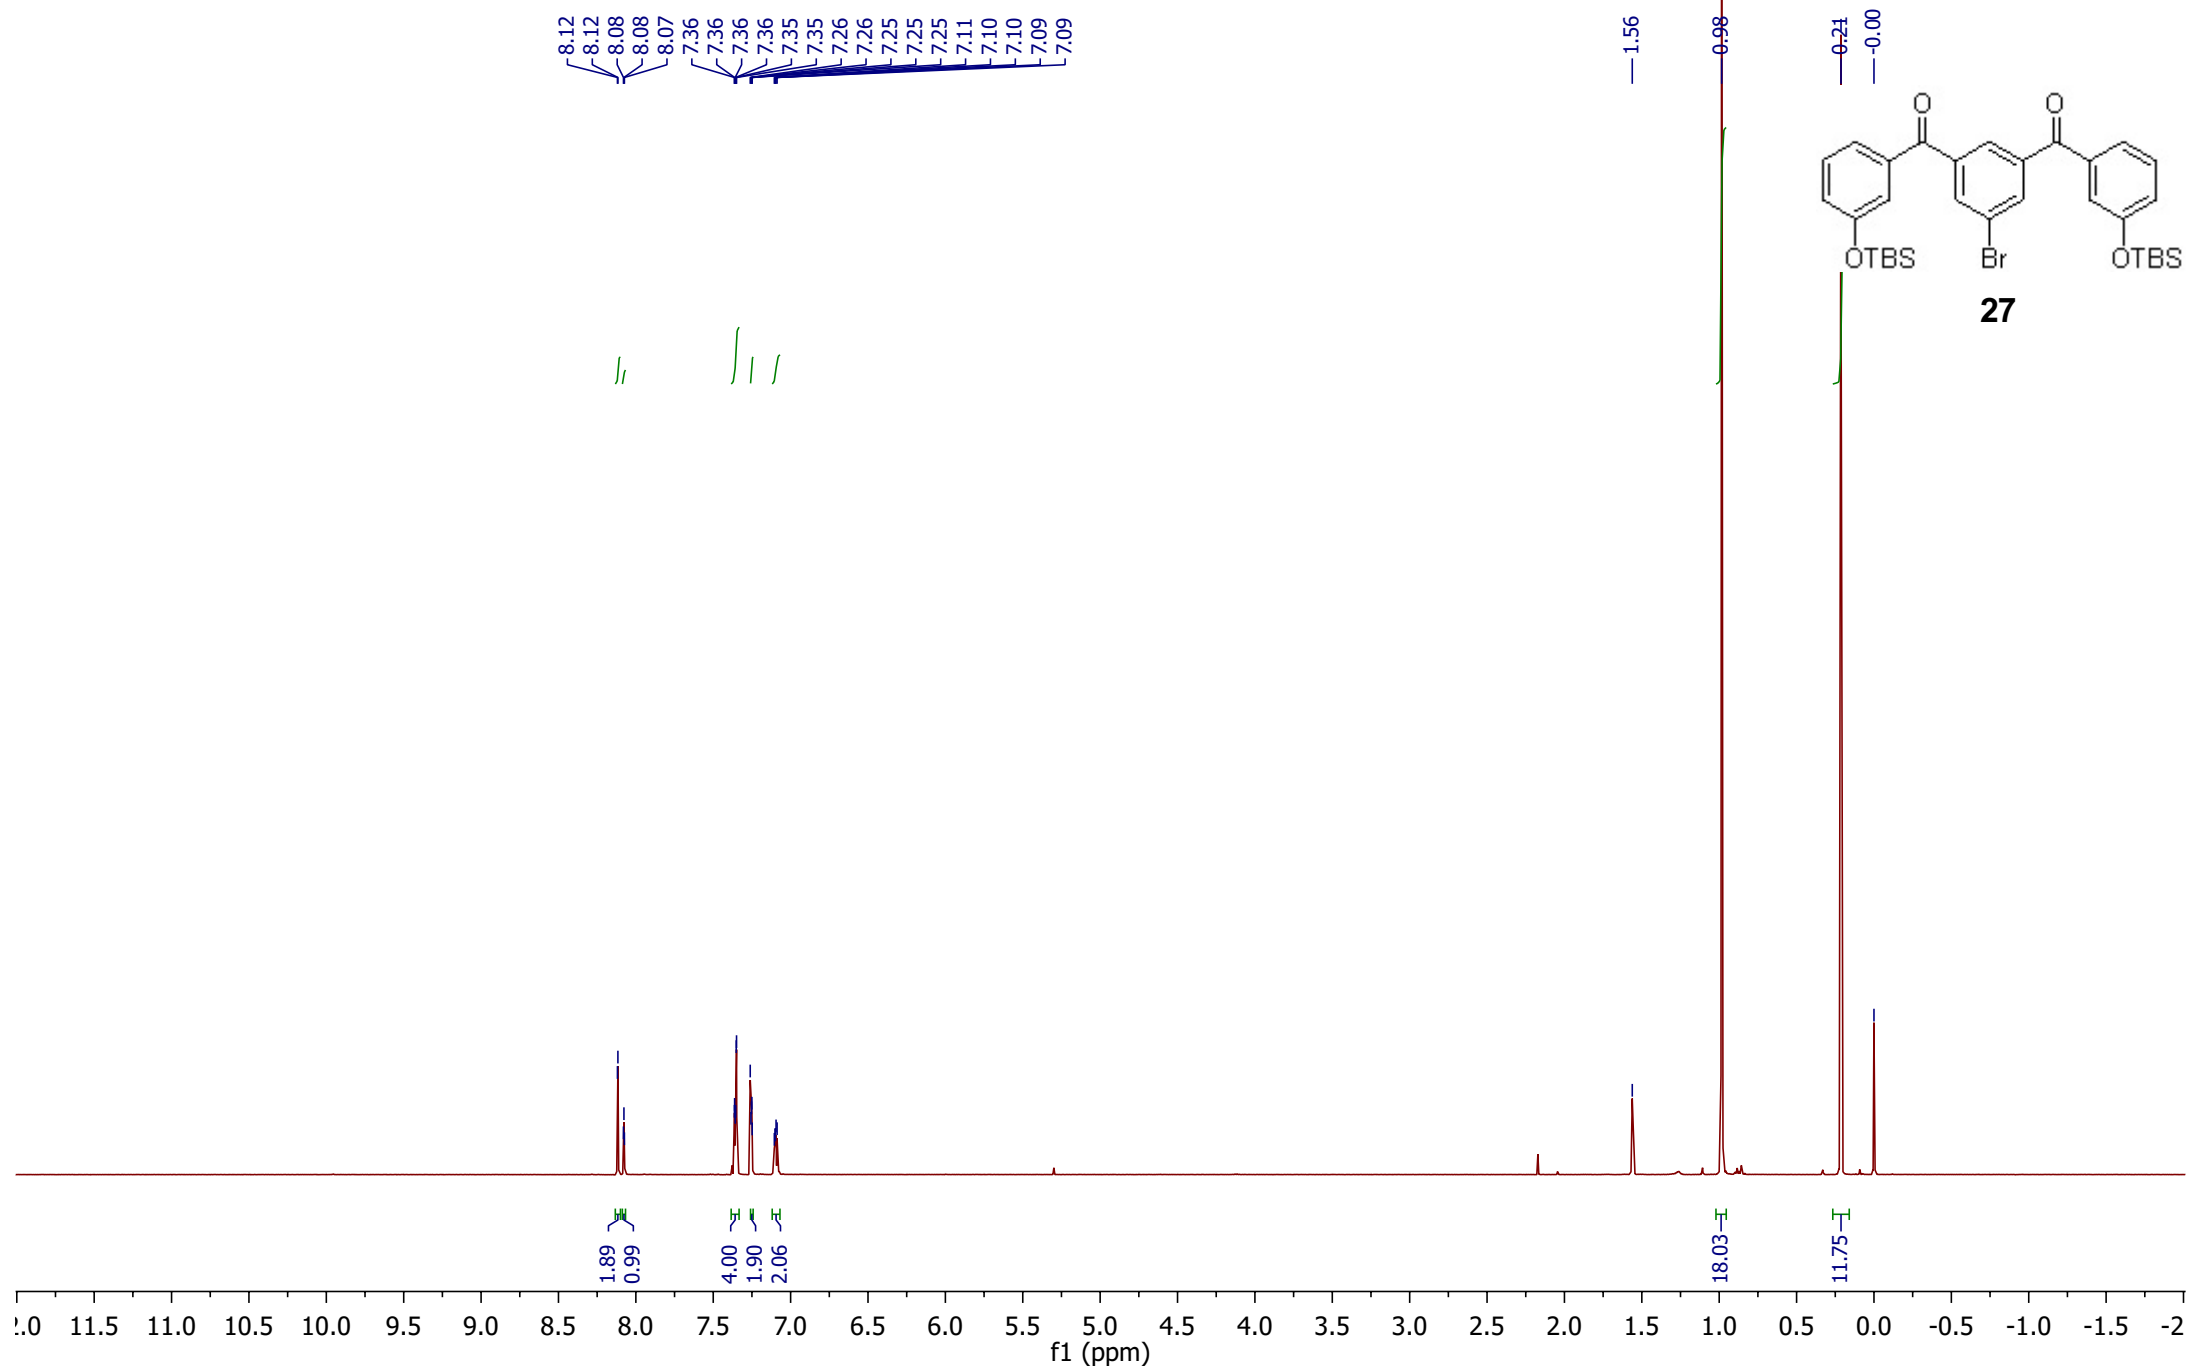

$^{13}\text{C}$  NMR (125 MHz,  $\text{CDCl}_3$ ) for Compound **27**

193.91

155.94

139.51  
137.70  
135.96  
129.68  
129.51  
125.21  
123.25  
122.65  
121.14

77.26  
77.01  
76.75

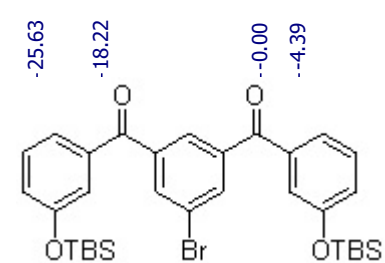

**27**

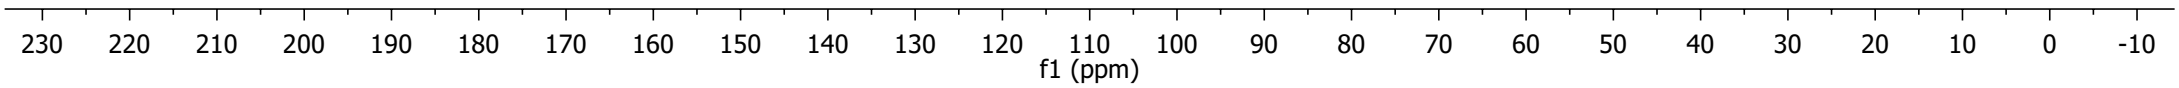

# HRMS (ESI) for Compound 27

C:\Xcalibur\...ENP\_IV\_88\_run2\_Orbi\_+ESI

12/30/2014 6:52:36 PM

ENP\_IV\_88\_run2\_Orbi\_+ESI #10 RT: 0.11 AV: 1 NL: 1.34E7  
T: FTMS + c ESI Full ms [150.00-1000.00]

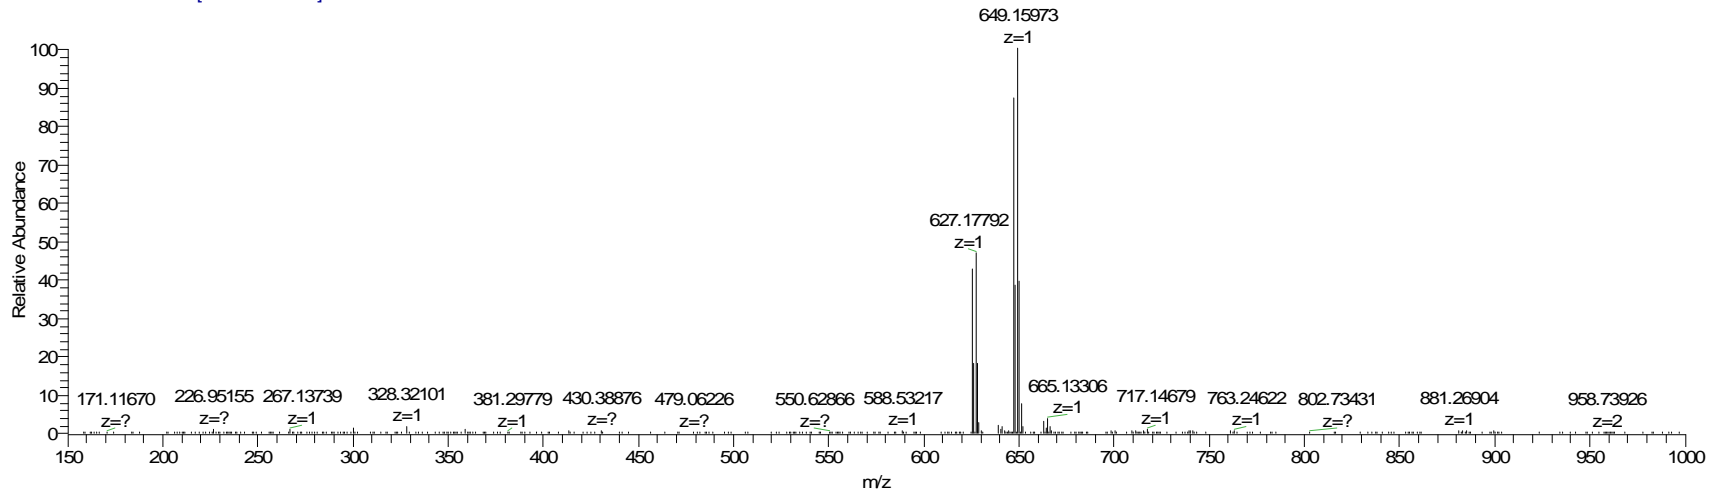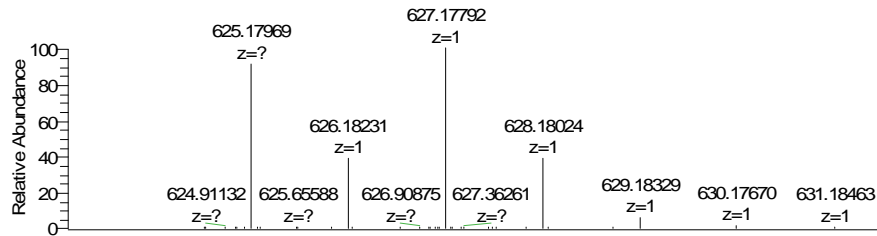

NL:  
6.26E6  
ENP\_IV\_88\_run2\_Orbi\_+ESI#10 RT: 0.11  
AV: 1 T: FTMS + c  
ESI Full ms  
[150.00-1000.00]

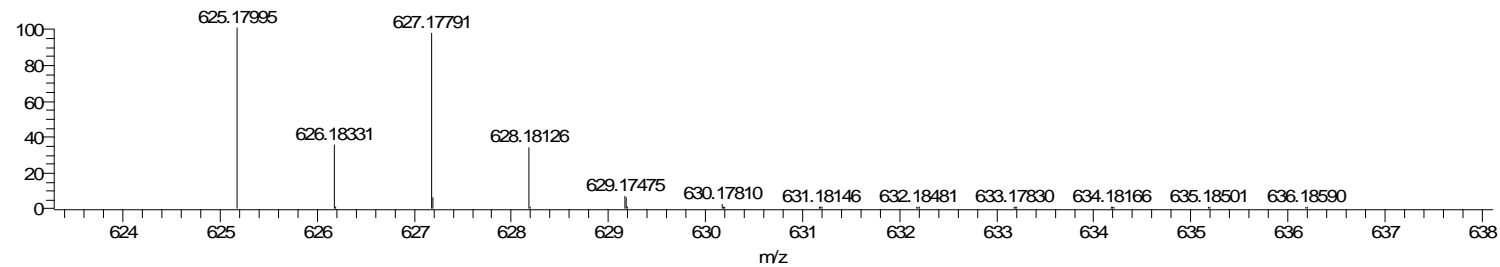

NL:  
3.01E5  
C<sub>32</sub>H<sub>41</sub>BrO<sub>4</sub>Si<sub>2</sub>+H  
C<sub>32</sub>H<sub>42</sub>Br<sub>1</sub>O<sub>4</sub>Si<sub>2</sub>  
pa Chrg 1

<sup>1</sup>H NMR (500 MHz, CDCl<sub>3</sub>) of Compound **28**

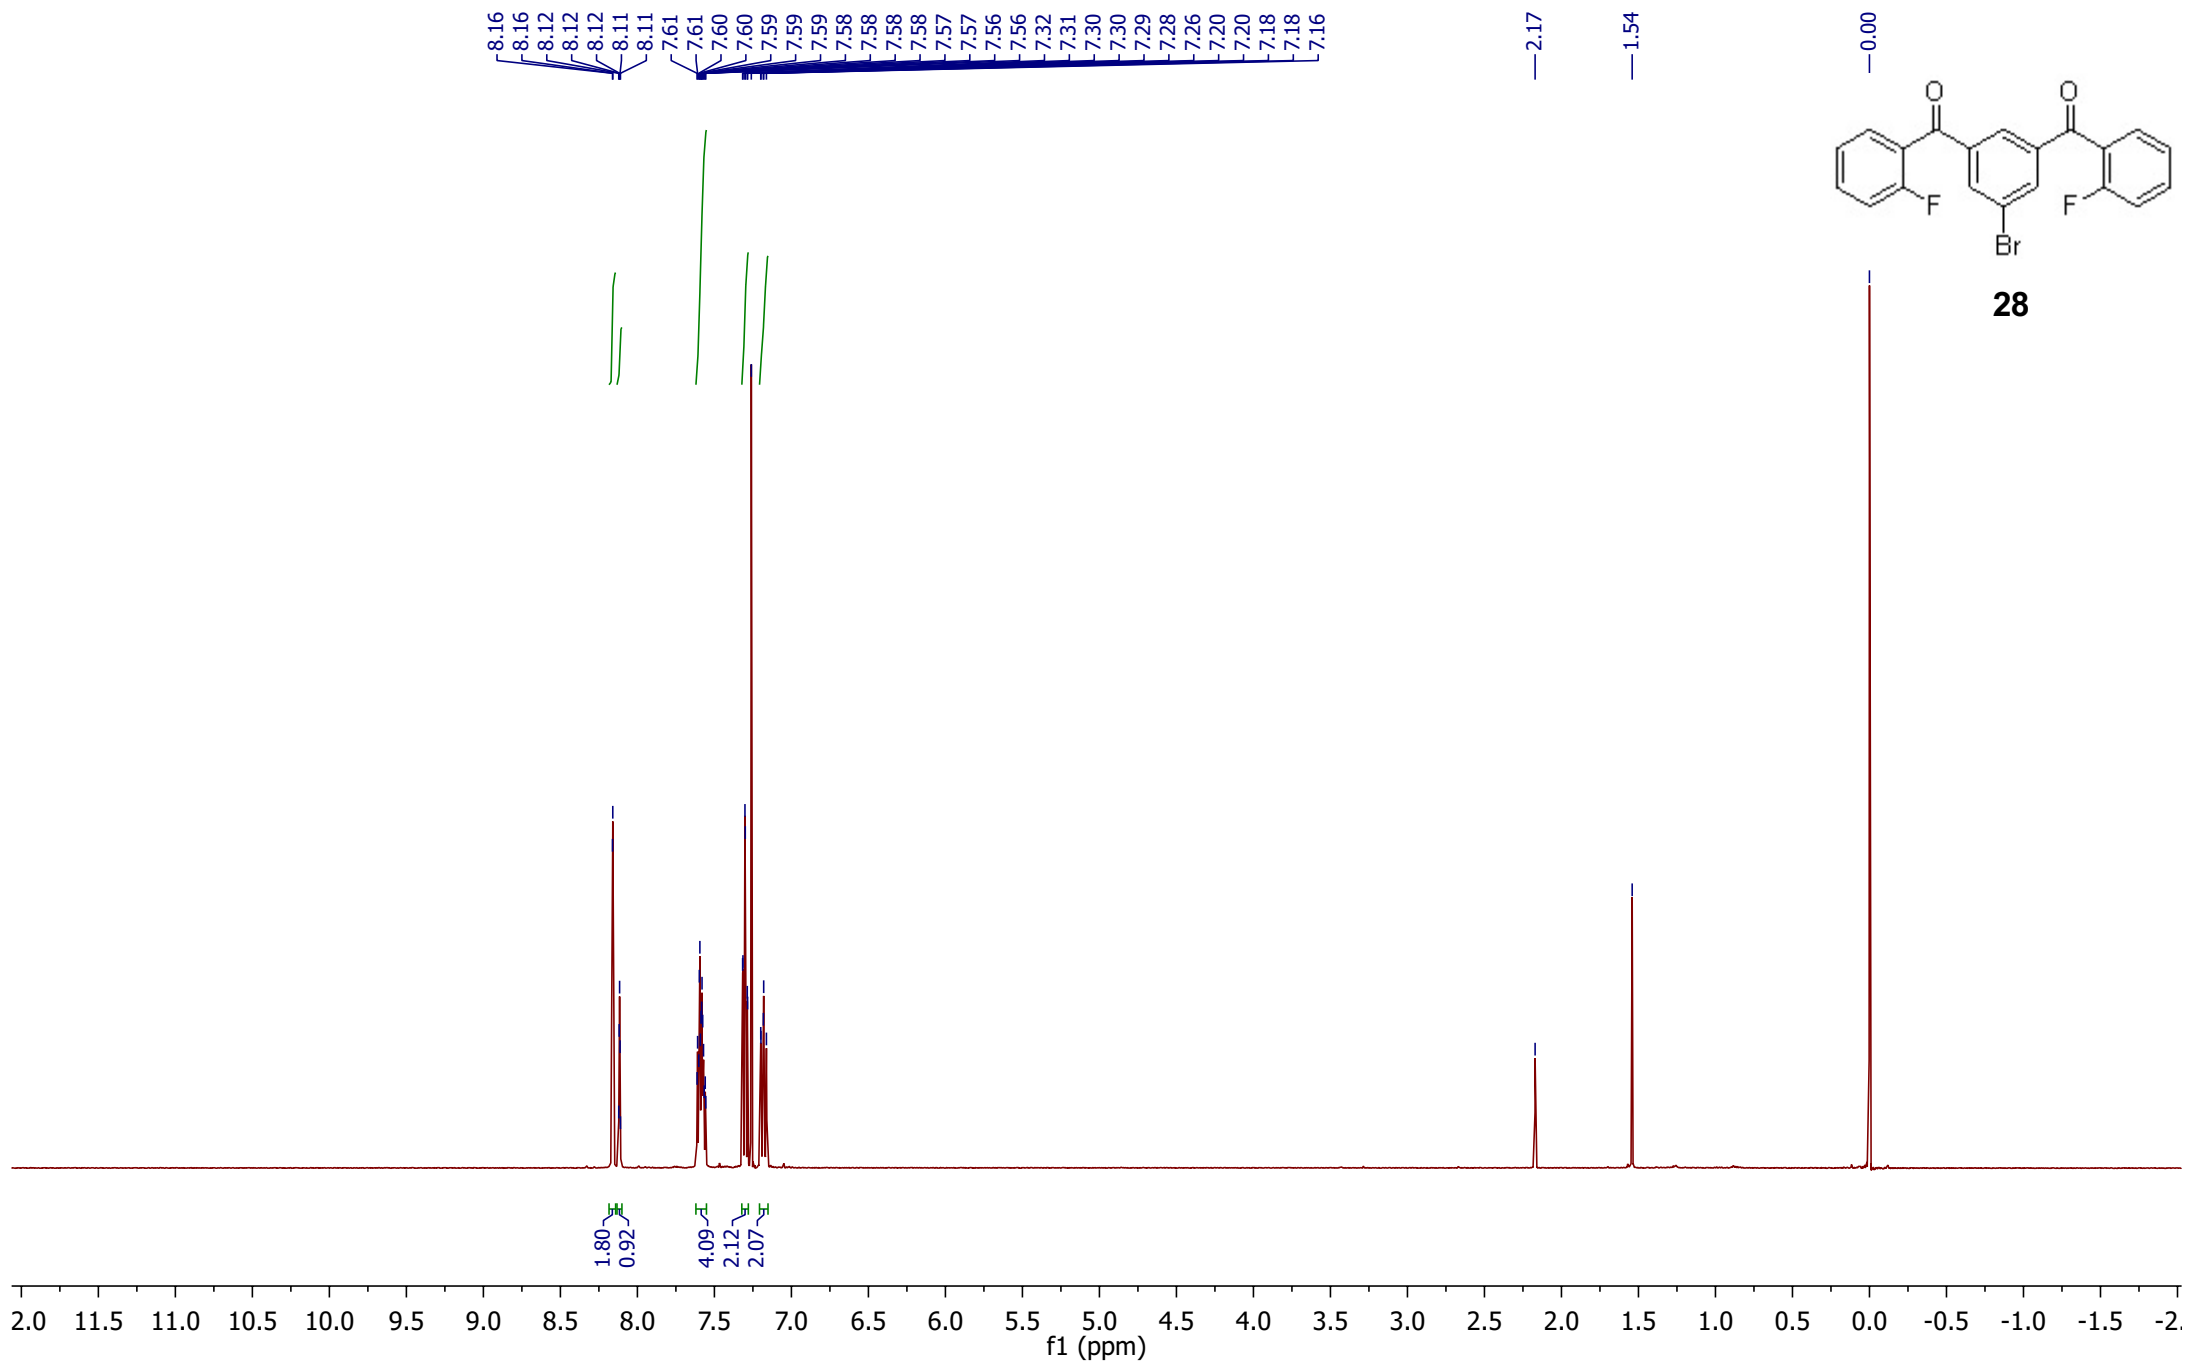

<sup>13</sup>C NMR (125 MHz, CDCl<sub>3</sub>) of Compound **28**

191.23

161.41  
159.39

139.67  
136.61  
134.32  
134.26  
131.13  
131.11  
129.31  
125.84  
125.73  
124.80  
124.77  
123.18  
116.78  
116.62

77.42  
77.16  
76.91

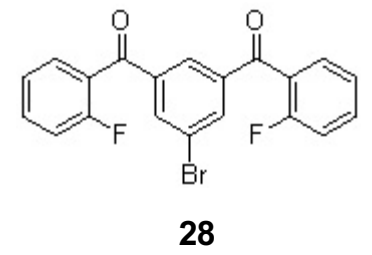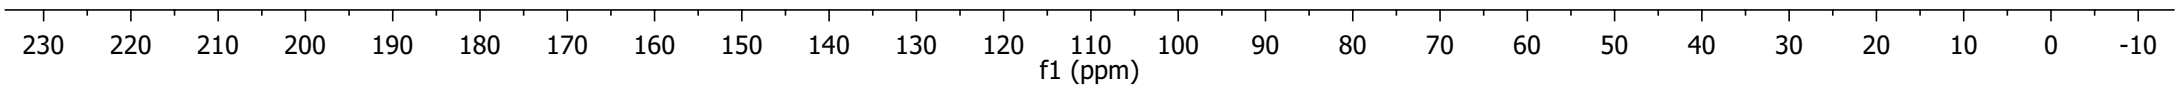

$^{19}\text{F}$  NMR (470 MHz,  $\text{CDCl}_3$ ) of Compound **28**

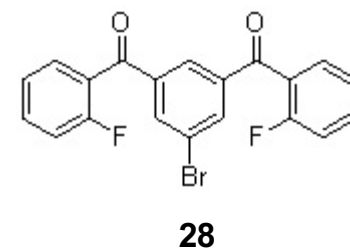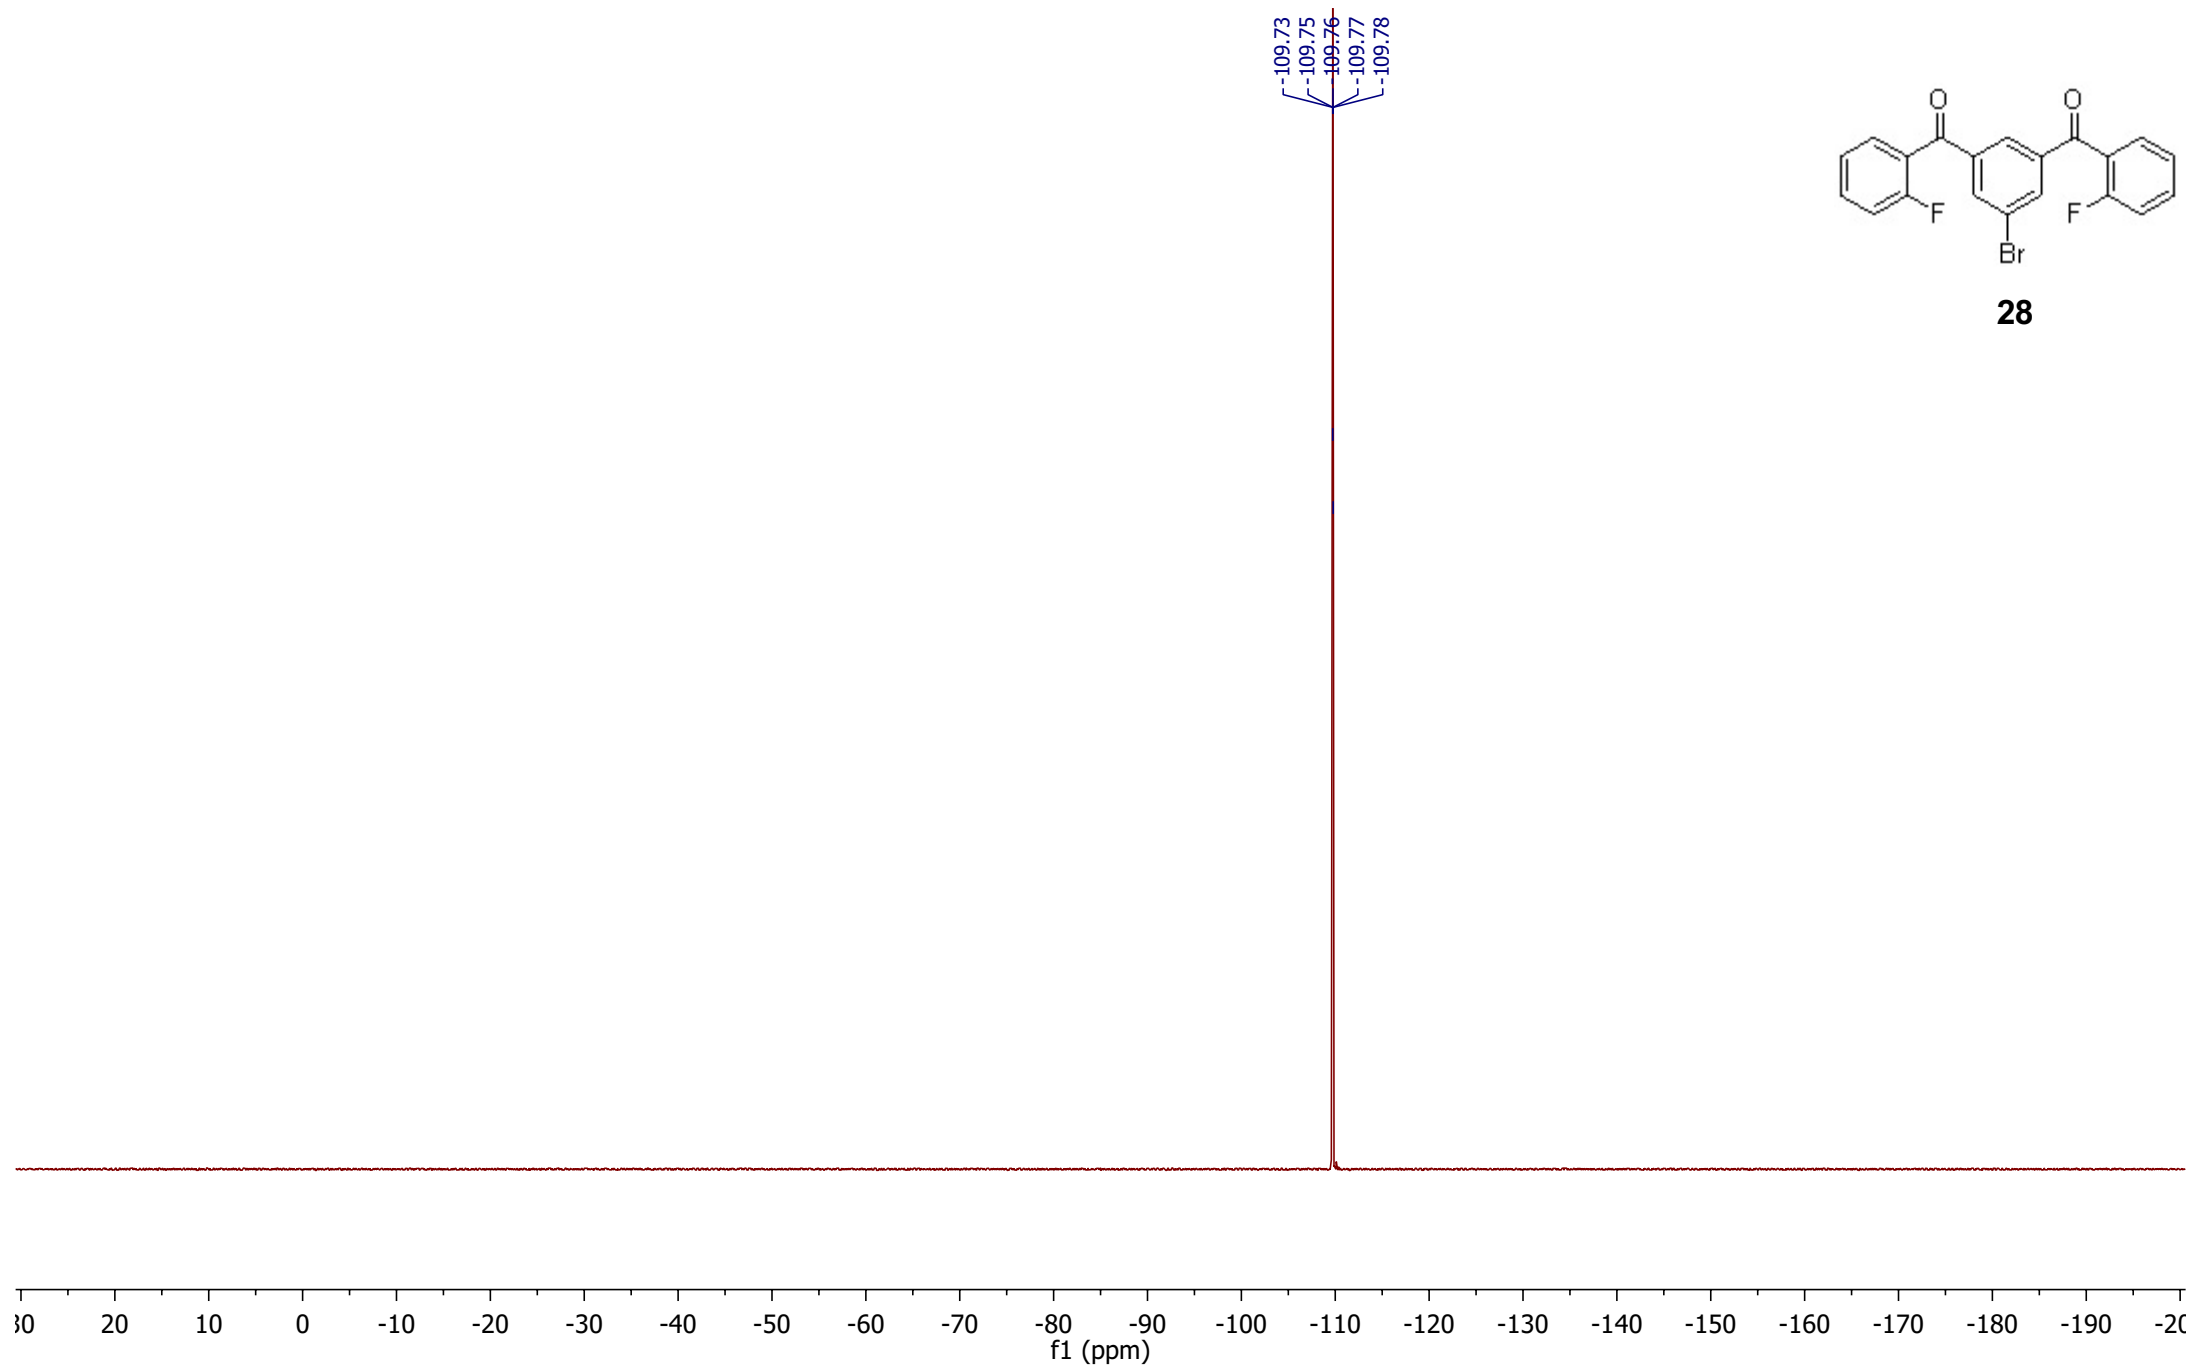



# HRMS (ESI) for Compound 28

ENP\_I\_137\_Orbi\_+ESI\_locked on 335.1254

12/30/2014 3:25:47 PM

ENP\_I\_137\_Orbi\_+ESI\_locked on 335.1254 #10 RT: 0.12 AV: 1 NL: 1.63E6  
T: FTMS + c ESI Full ms [150.00-600.00]

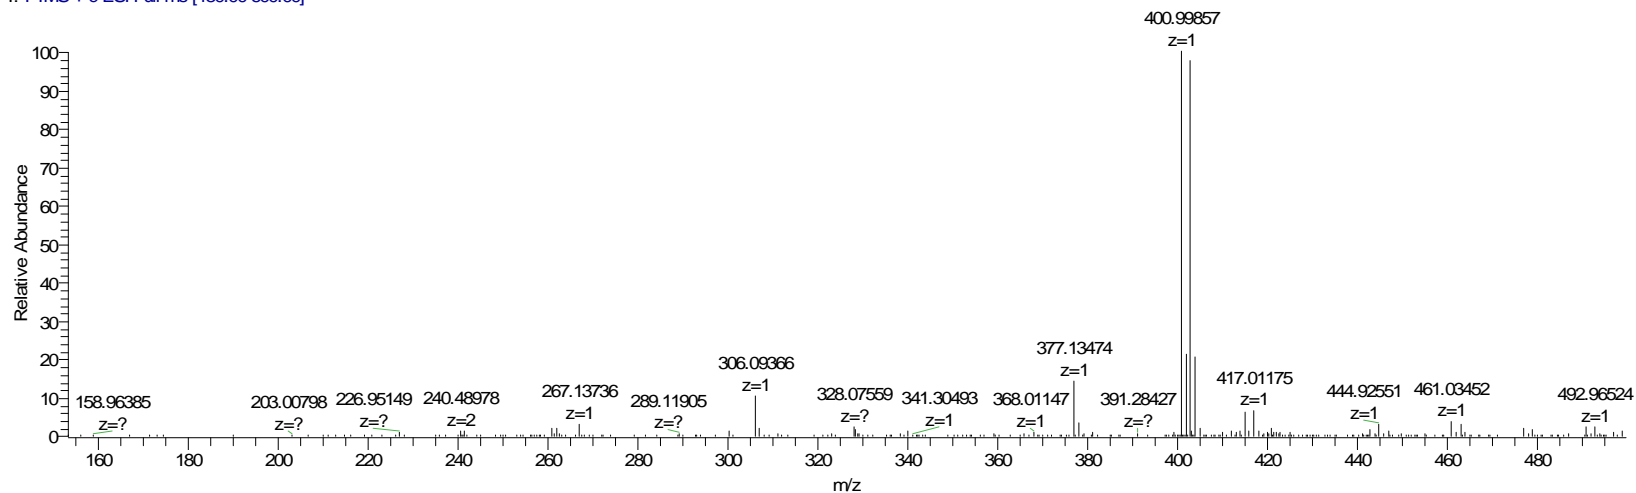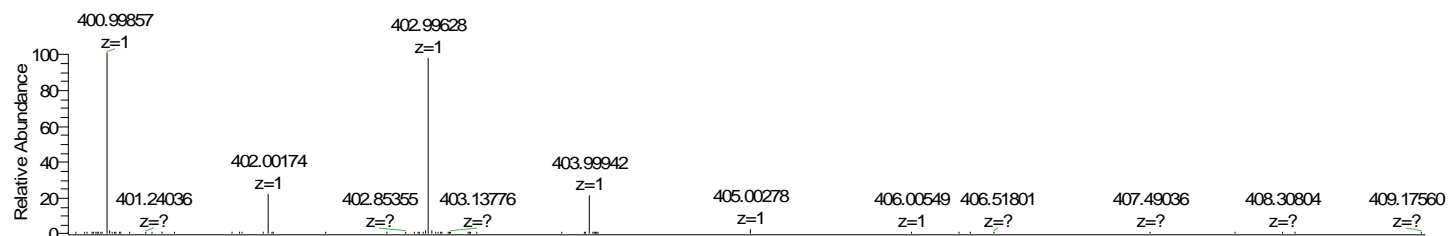

NL:  
1.63E6  
ENP\_I\_137\_Orbi\_+  
ESI\_locked on  
335.1254#10 RT: 0.12  
AV: 1 T: FTMS + c ESI  
Full ms [150.00-600.00]

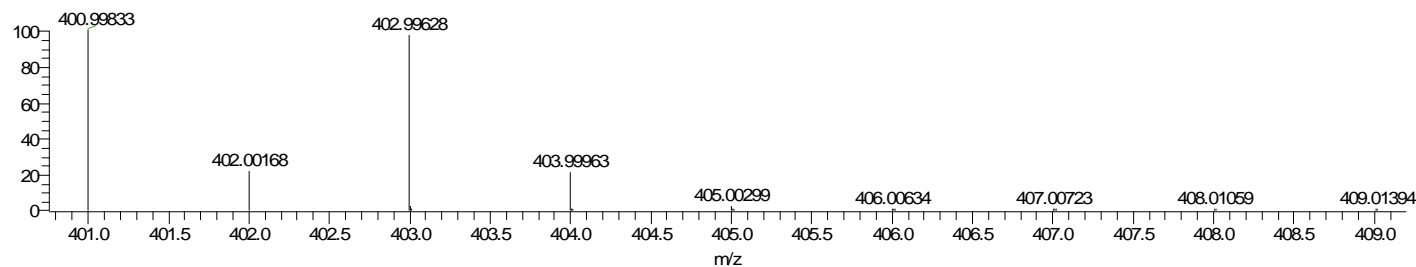

NL:  
4.06E5  
C<sub>20</sub>H<sub>11</sub>BrF<sub>2</sub>O<sub>2</sub>+H  
C<sub>20</sub>H<sub>12</sub>Br<sub>1</sub>F<sub>2</sub>O<sub>2</sub>  
pa Chrg 1

<sup>1</sup>H NMR (500 MHz, DMSO-d<sub>6</sub>) of Compound **29**

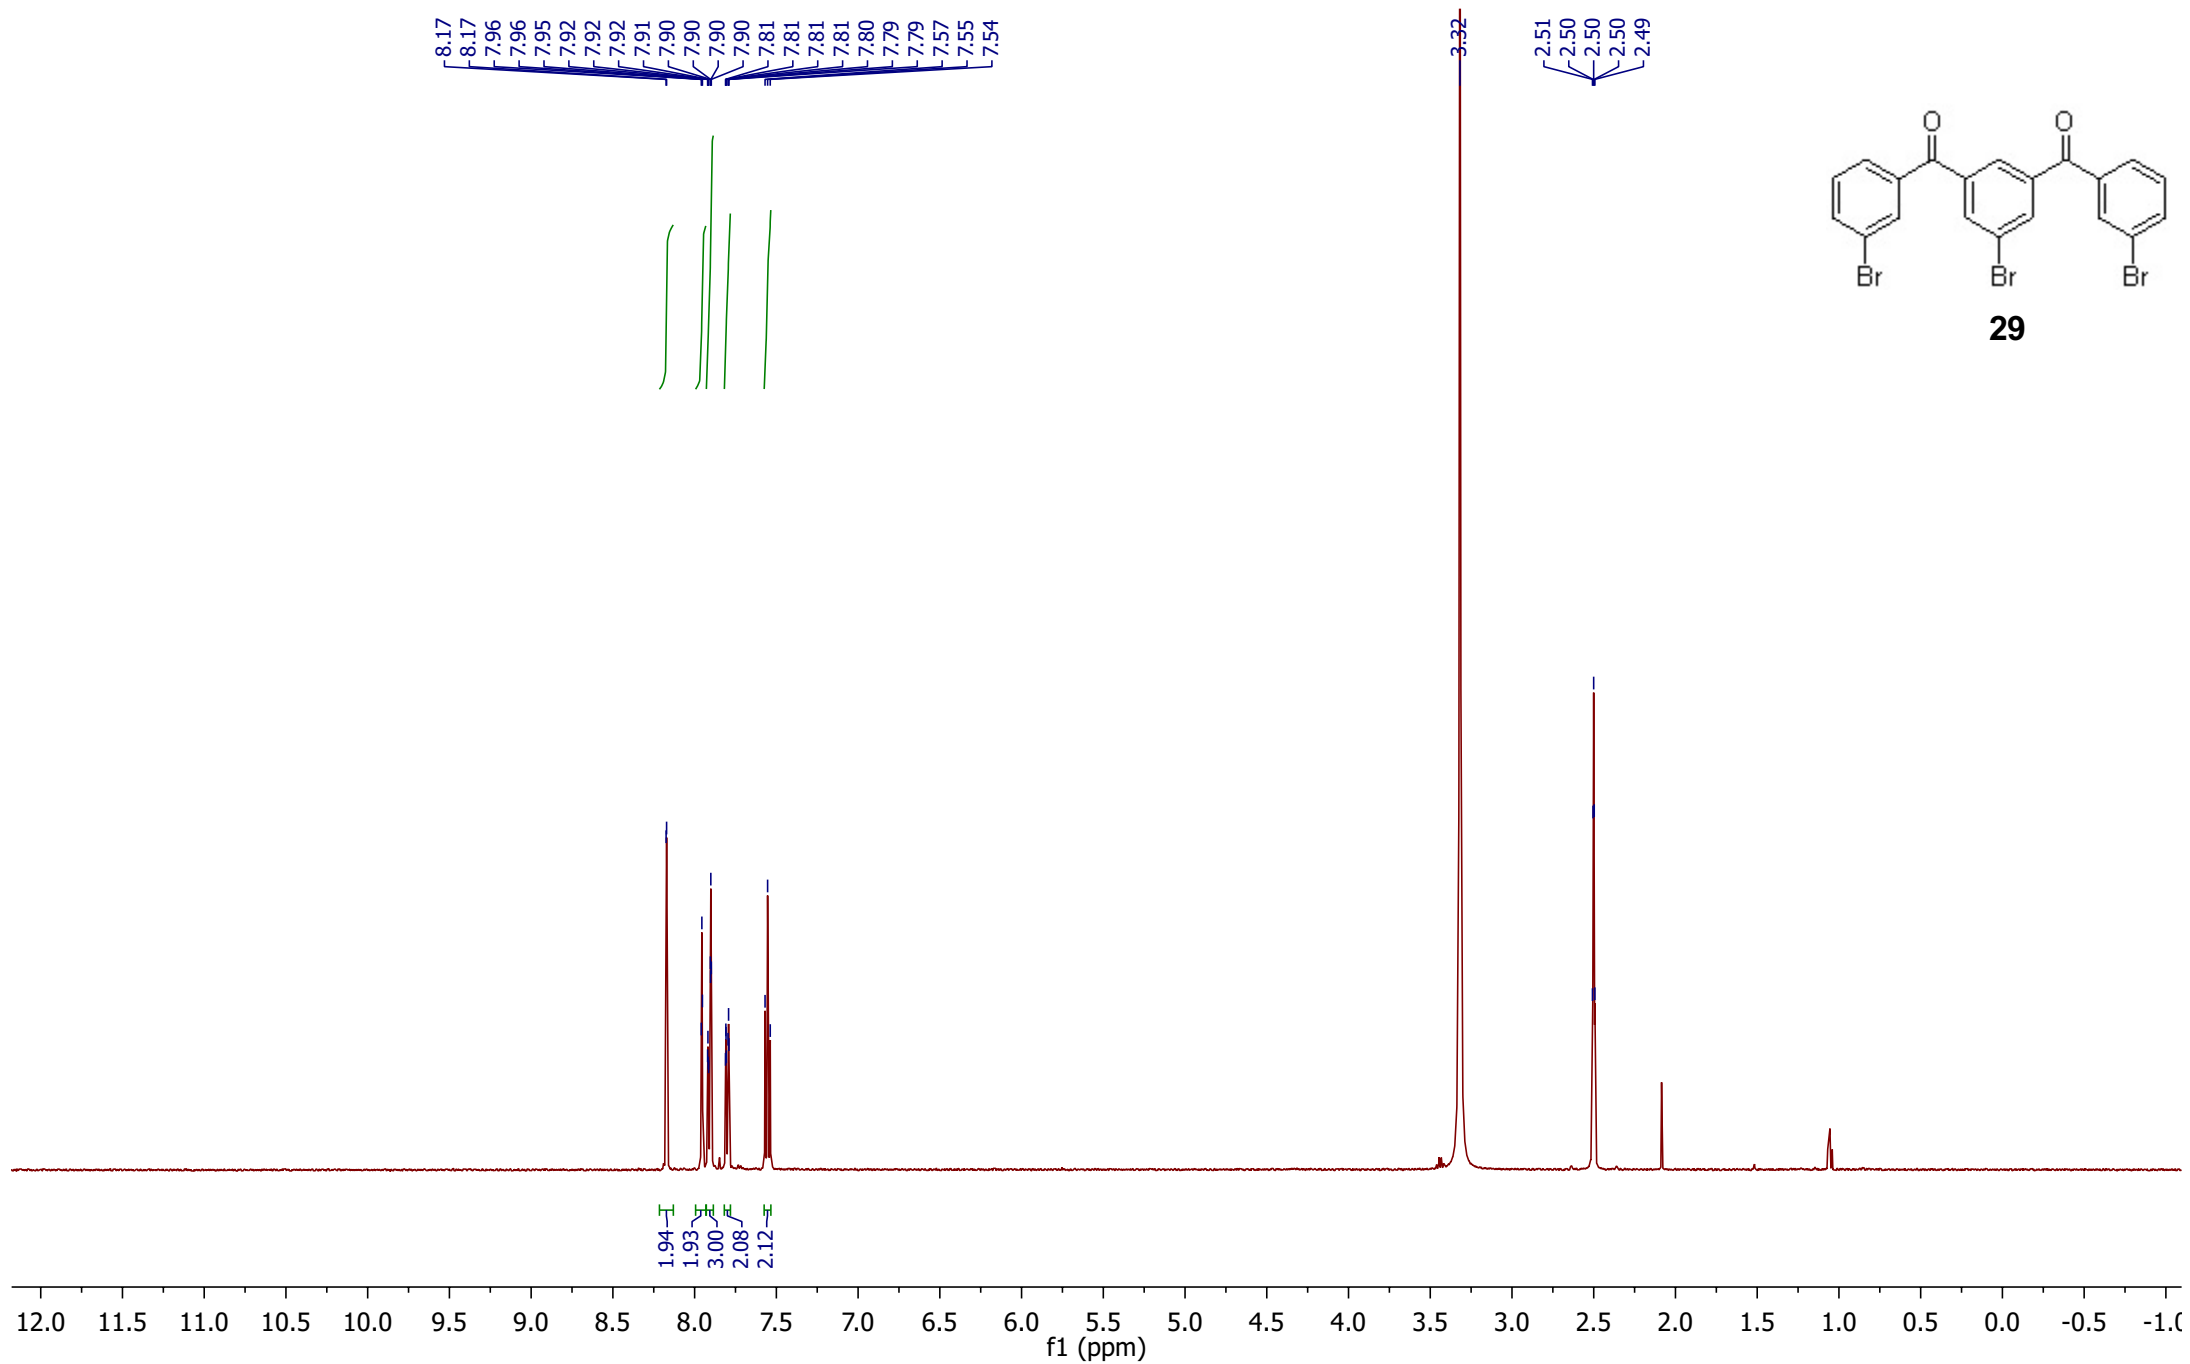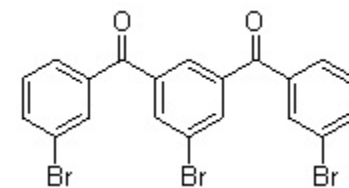

**29**

<sup>13</sup>C NMR (125 MHz, DMSO-d<sub>6</sub>) of Compound **29**

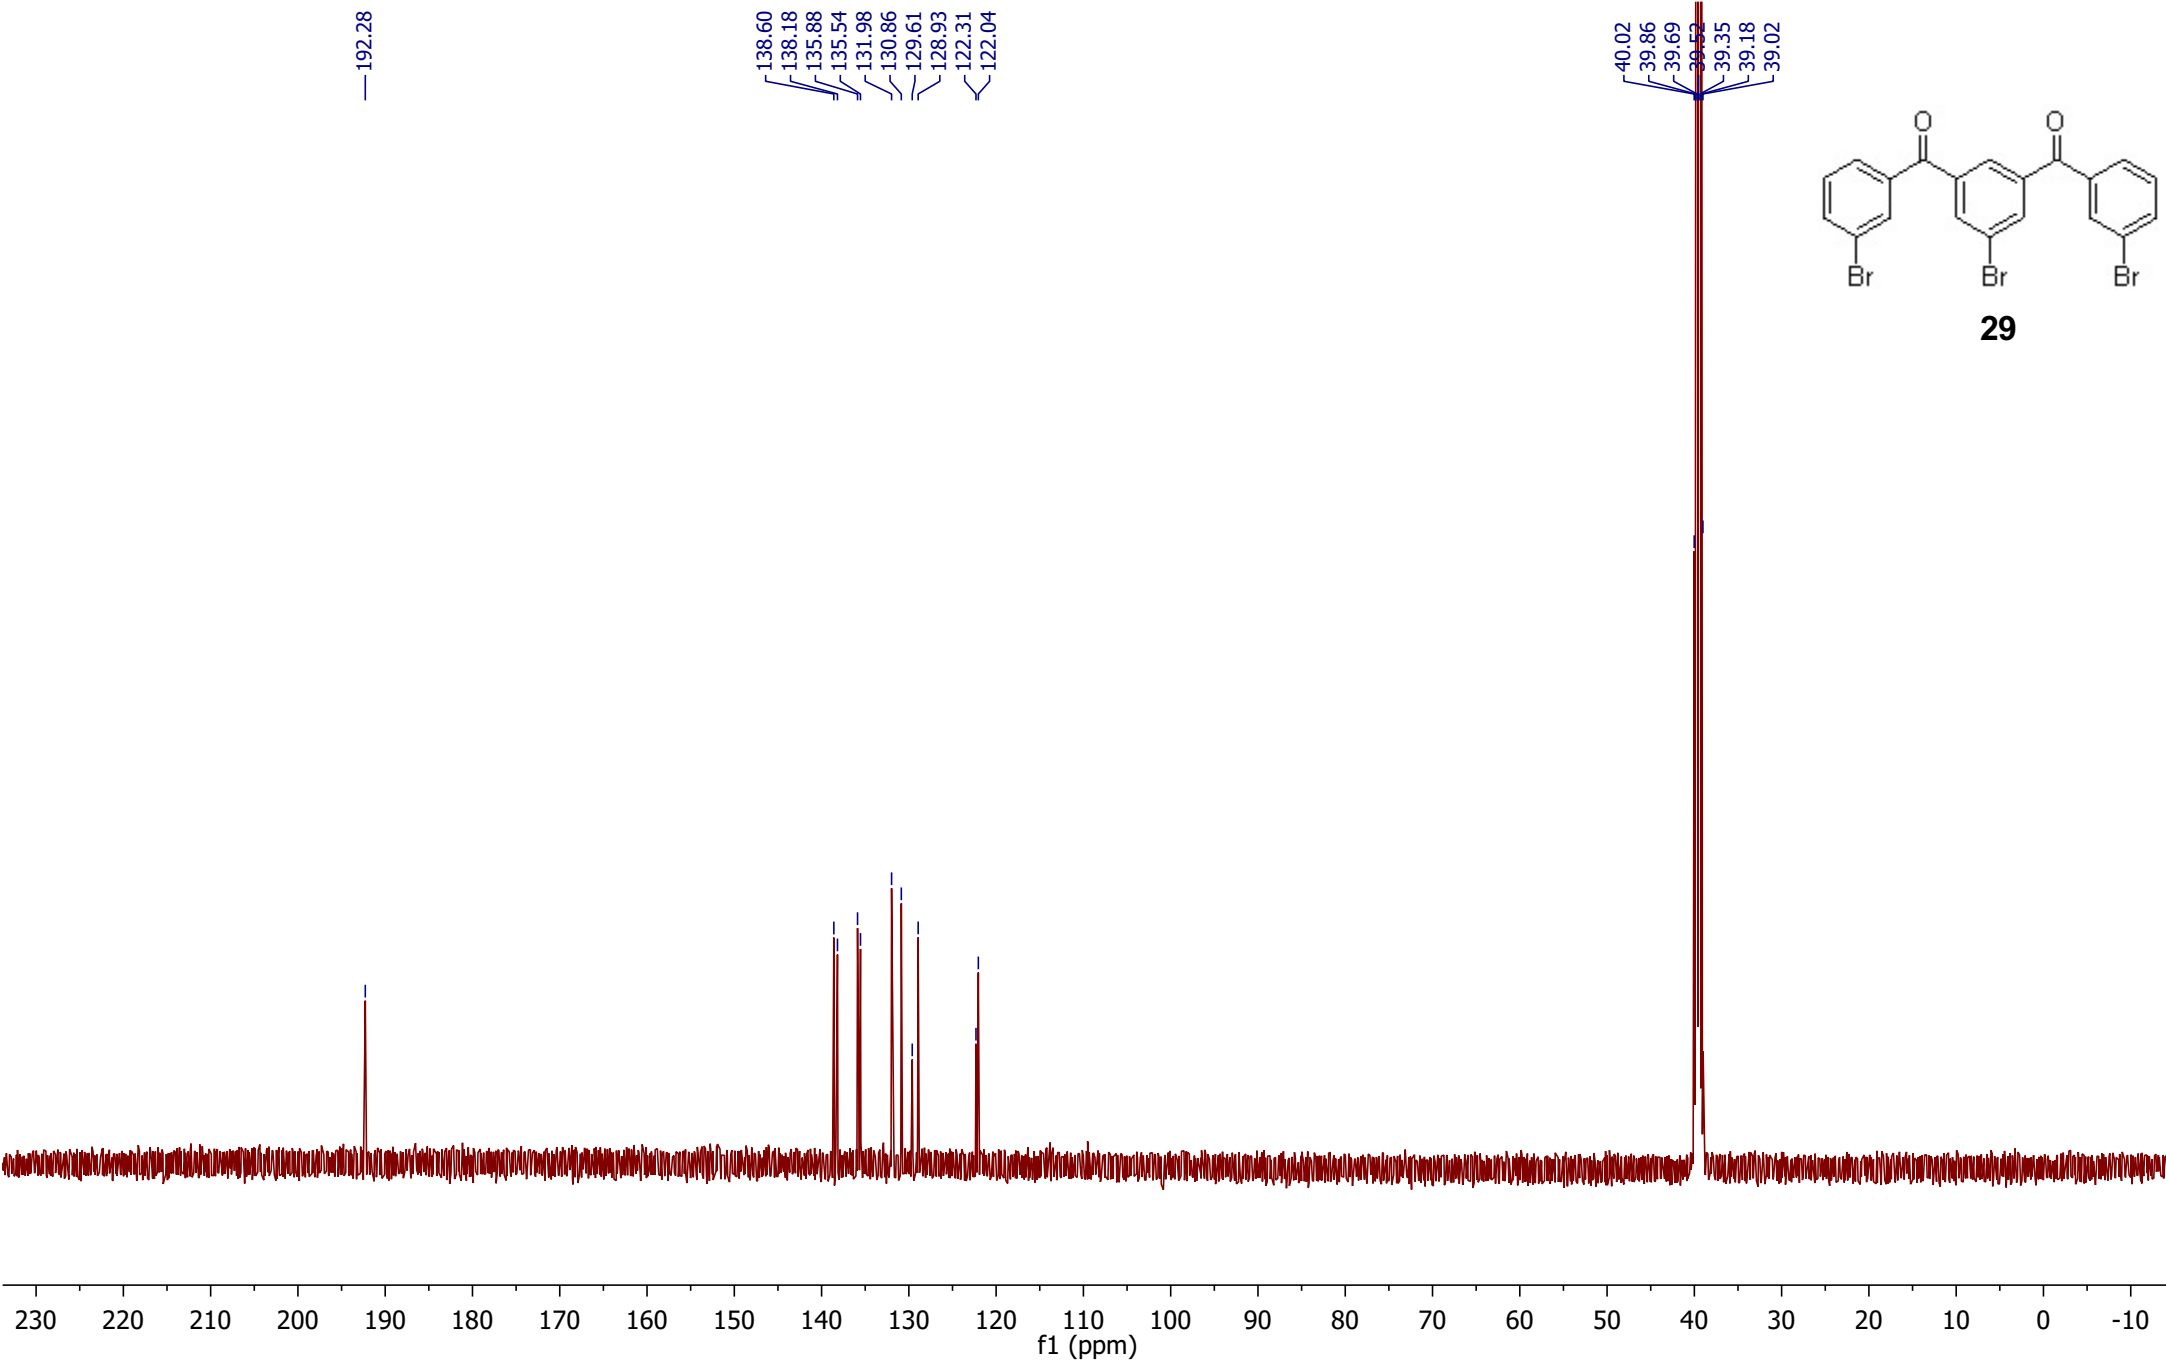

# HRMS (ESI) for Compound 29

C:\Xcalibur\...ENP\_V\_37\_run3\_Orbi\_+ESI

12/30/2014 8:37:32 PM

ENP\_V\_37\_run3\_Orbi\_+ESI #10 RT: 0.14 AV: 1 NL: 2.65E5  
T: FTMS + c ESI Full ms [250.00-700.00]

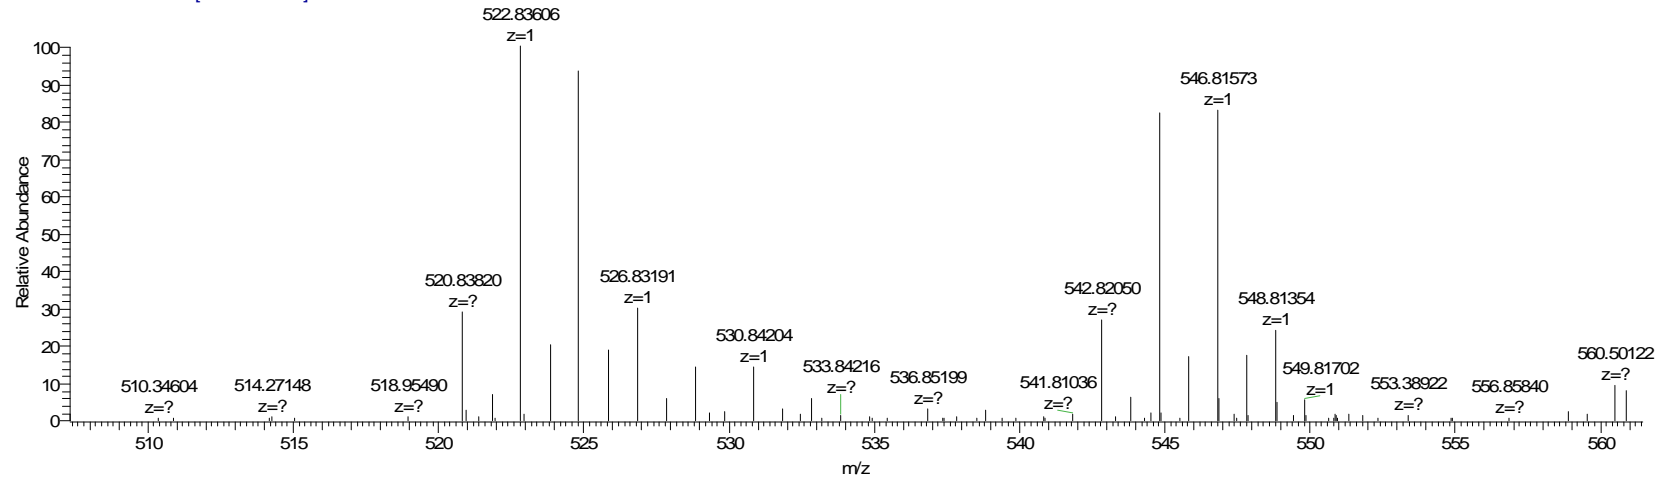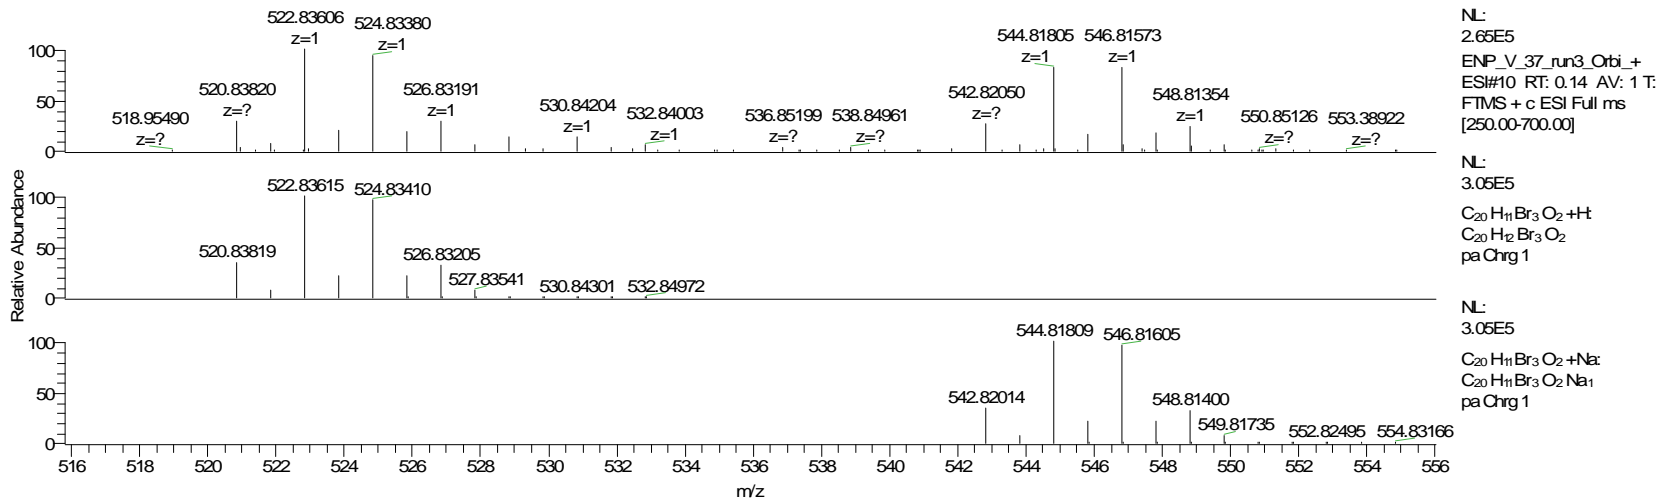

<sup>1</sup>H NMR (500 MHz, CDCl<sub>3</sub>) of Compound **30**

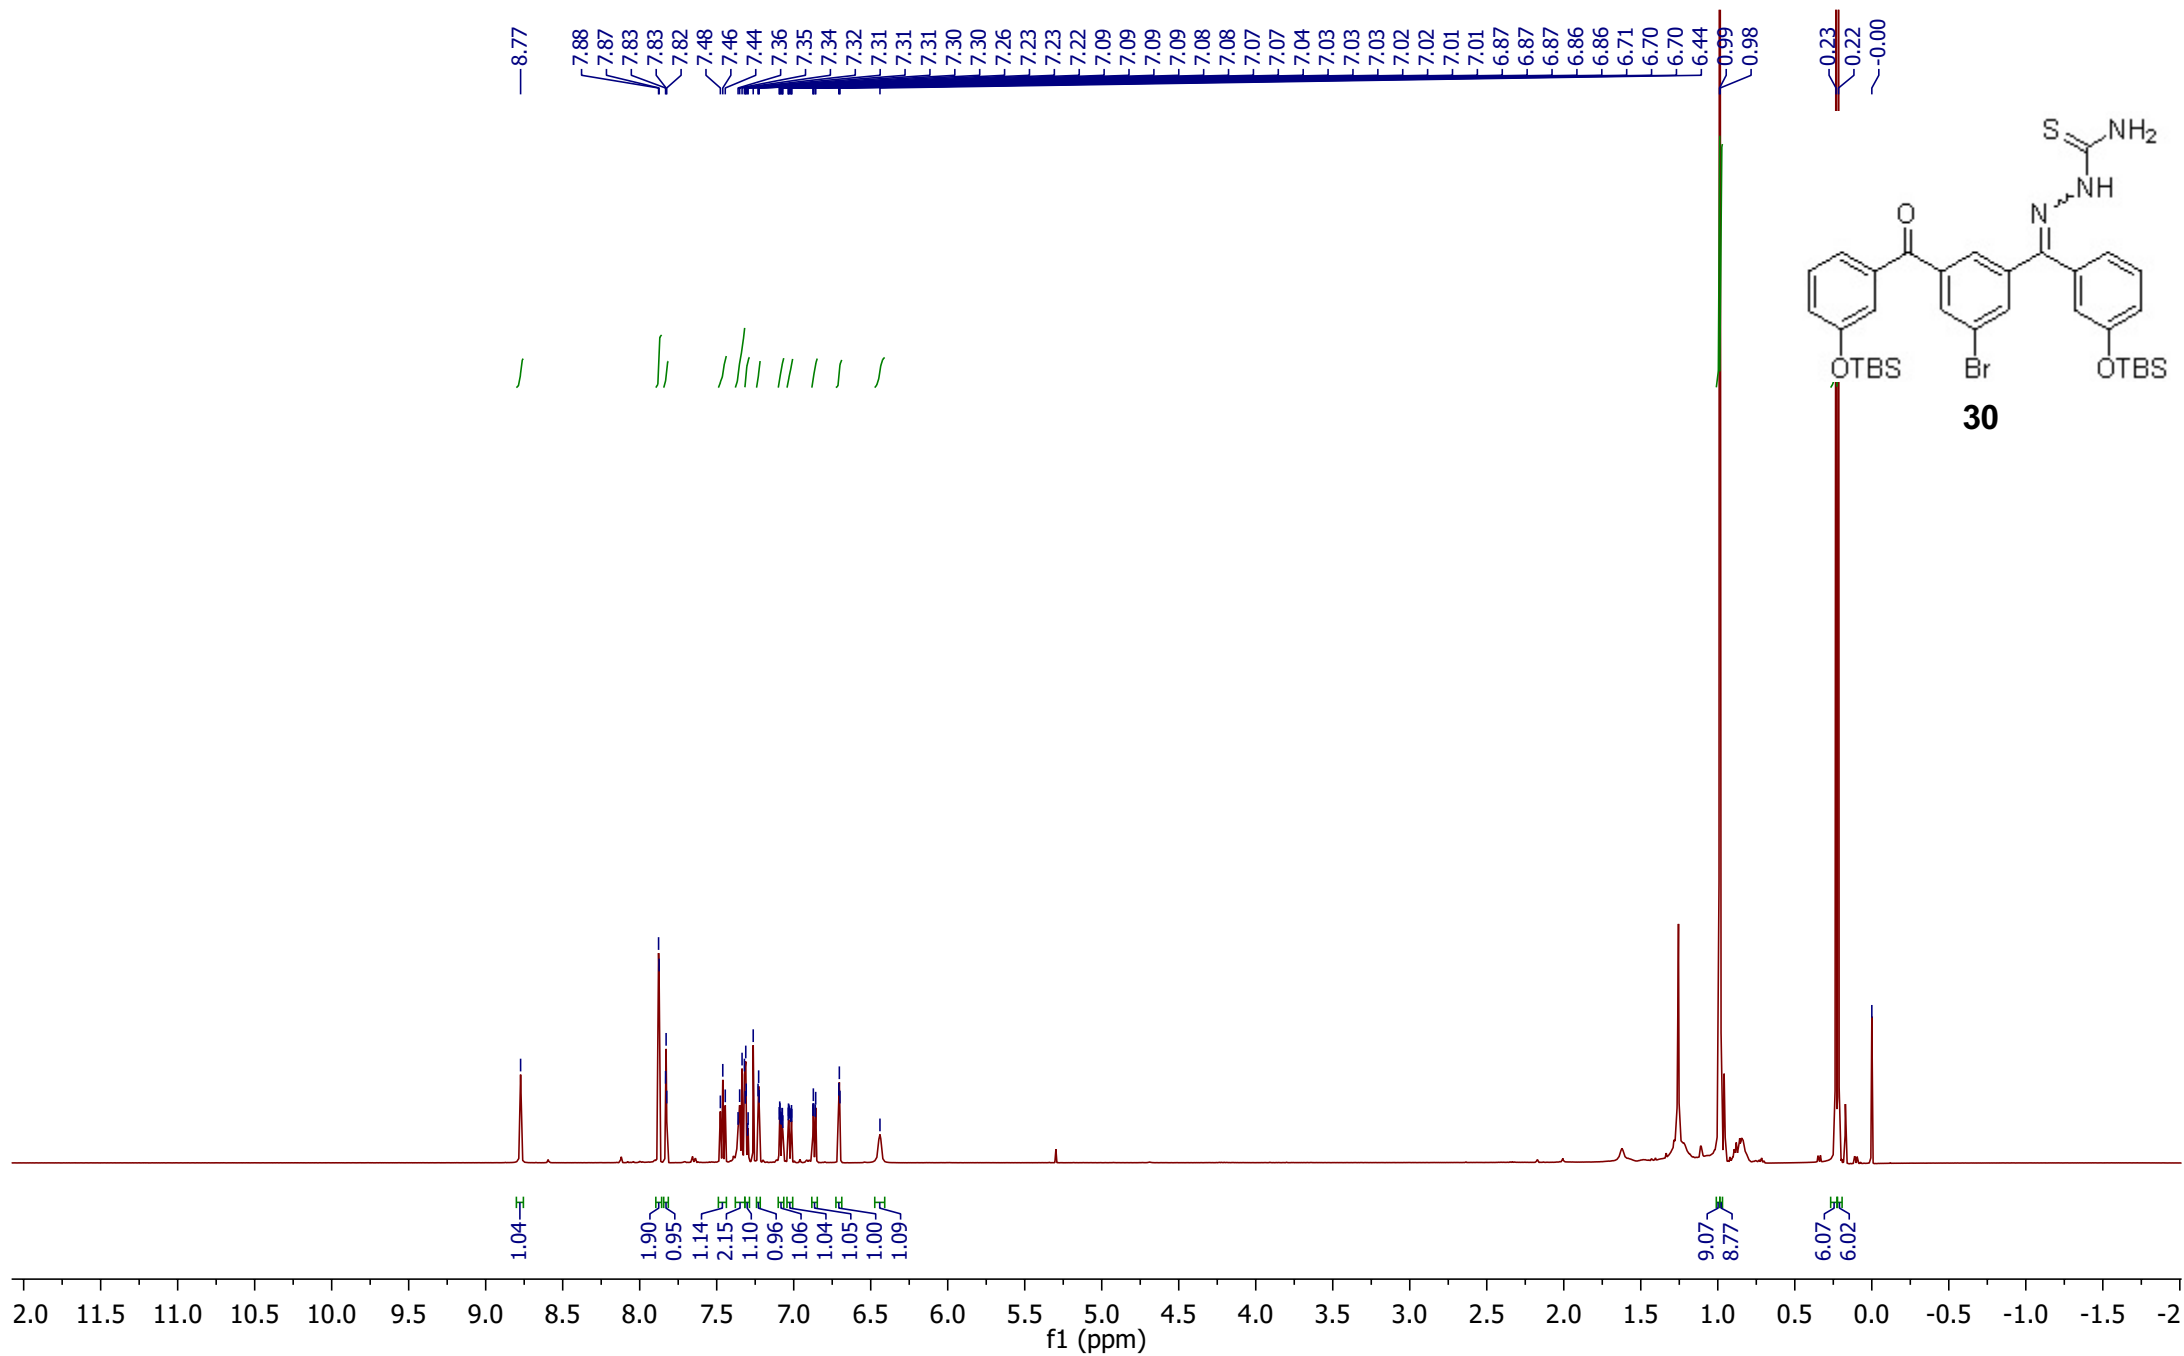

$^{13}\text{C}$  NMR (125 MHz,  $\text{CDCl}_3$ ) of Compound **30**

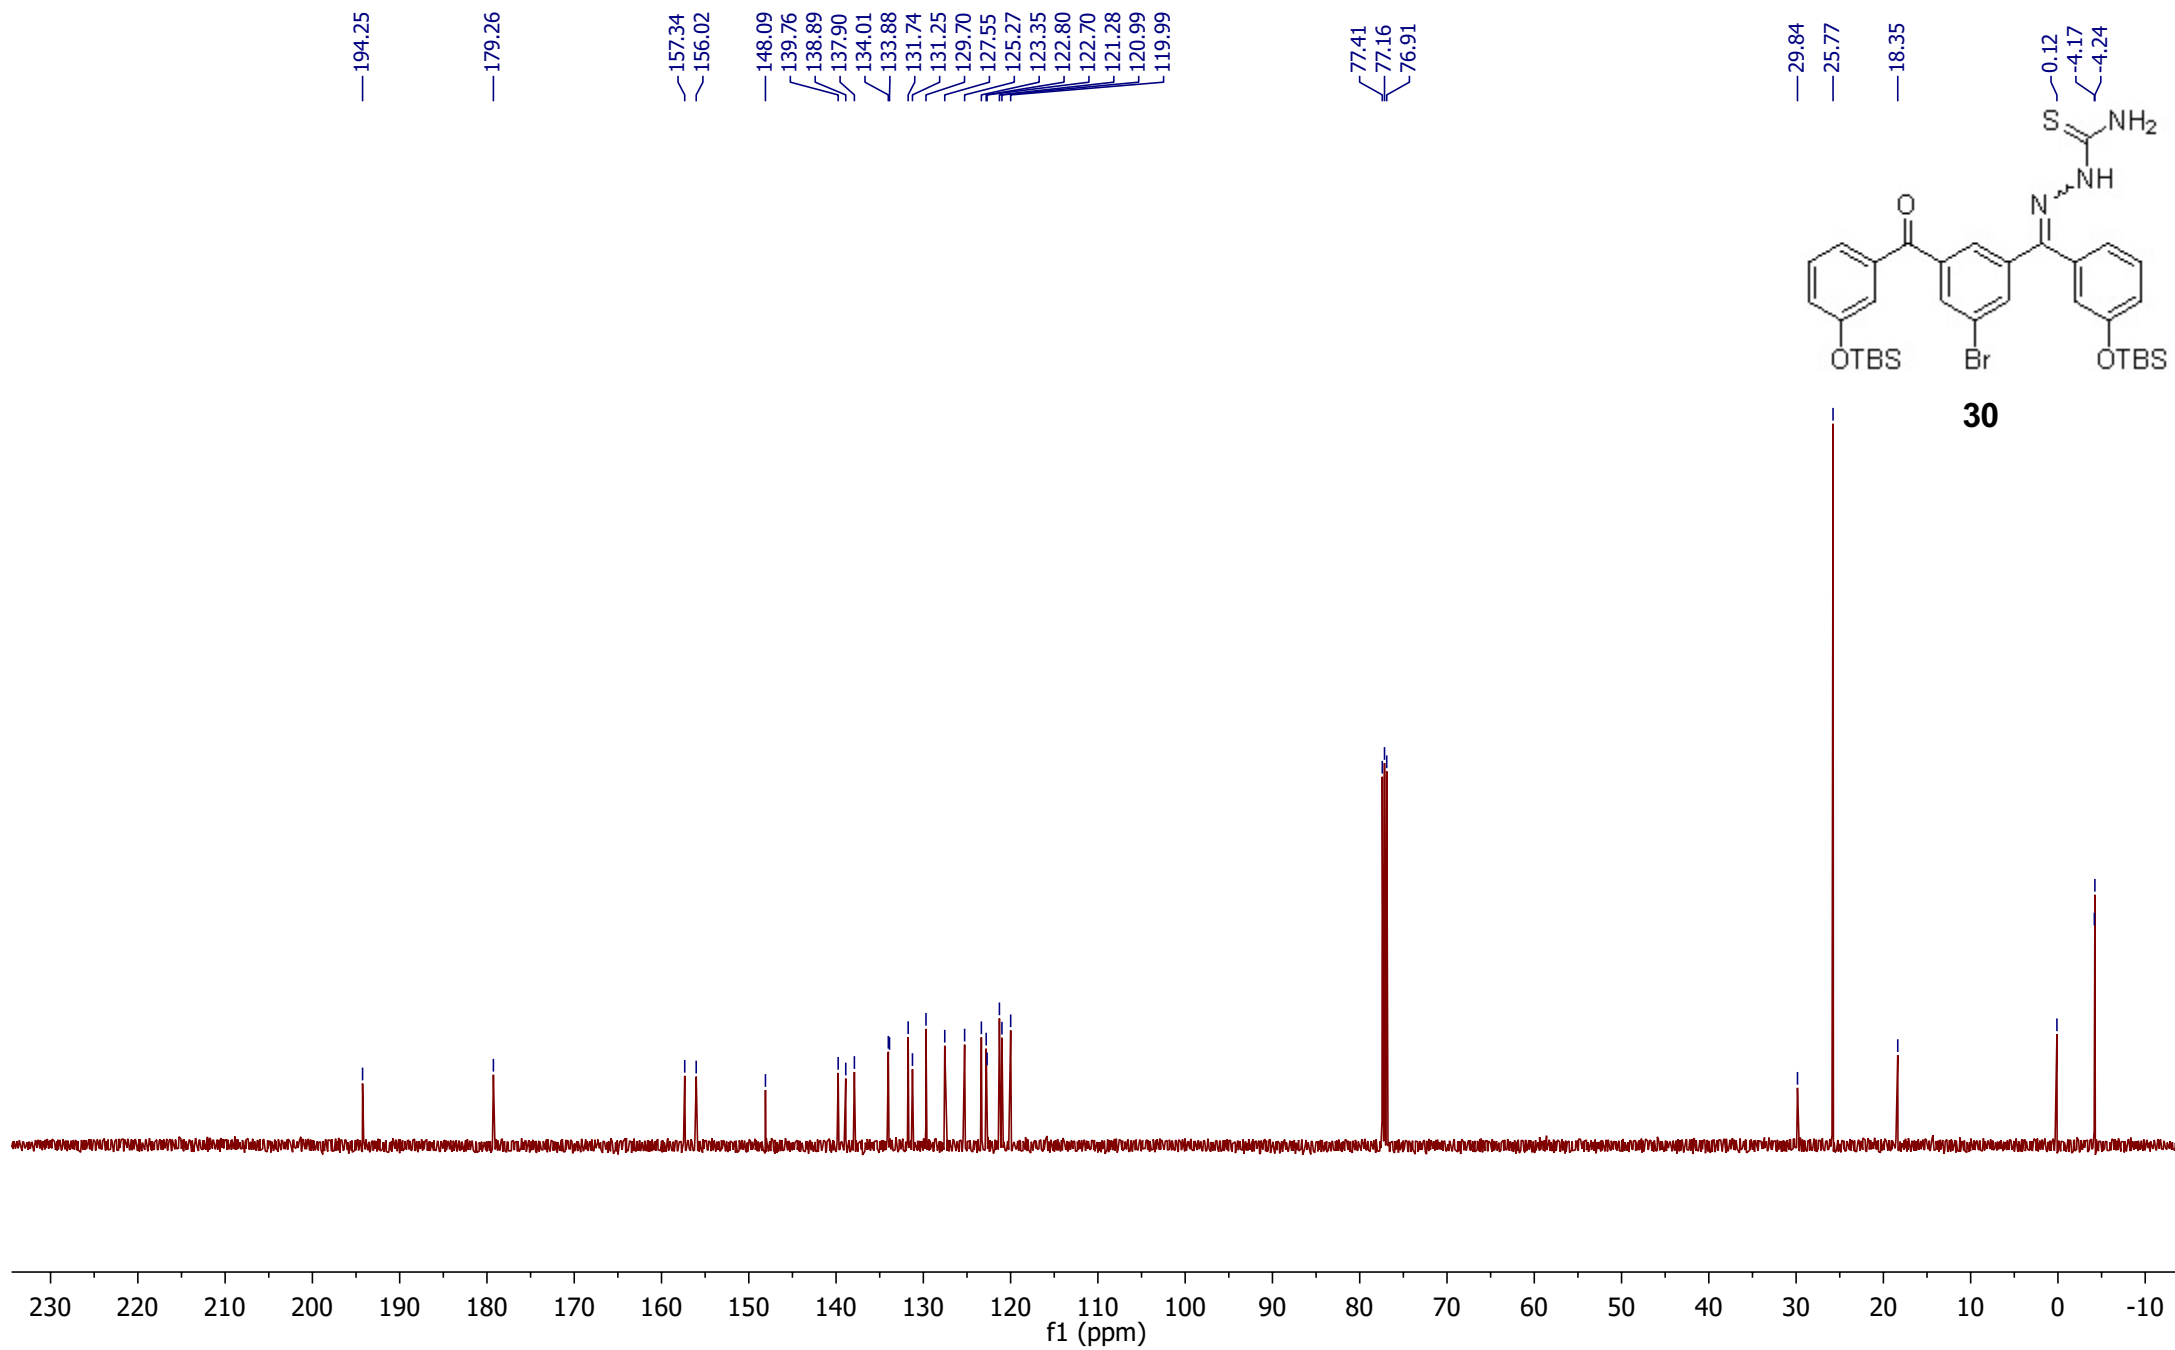

# HRMS (ESI) for Compound 30

C:\Xcalibur\...ENP\_IV\_91\_run2\_Orbi\_+ESI

12/30/2014 6:32:30 PM

ENP\_IV\_91\_run2\_Orbi\_+ESI #10 RT: 0.09 AV: 1 NL: 2.89E6  
T: FTMS + c ESI Full ms [150.00-1000.00]

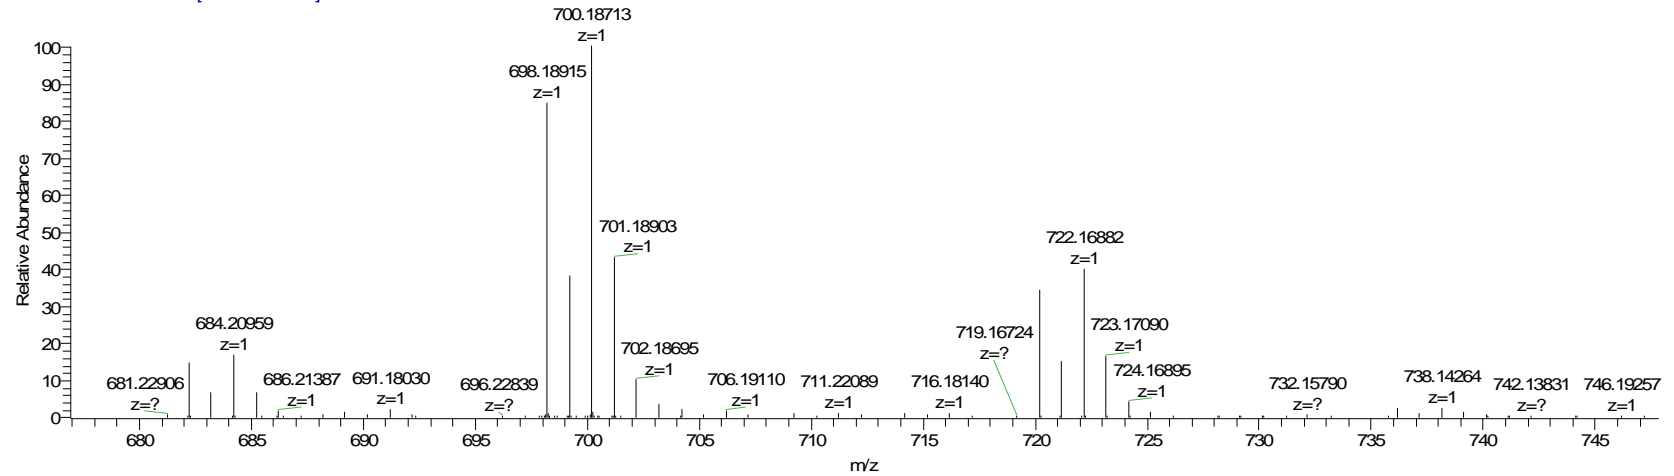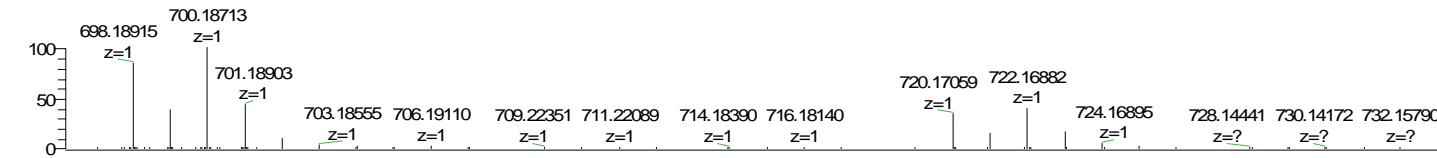

NL:  
2.89E6  
ENP\_IV\_91\_run2\_Orbi\_+  
ESI#10 RT: 0.09 AV: 1 T:  
FTMS + c ESI Full ms  
[150.00-1000.00]

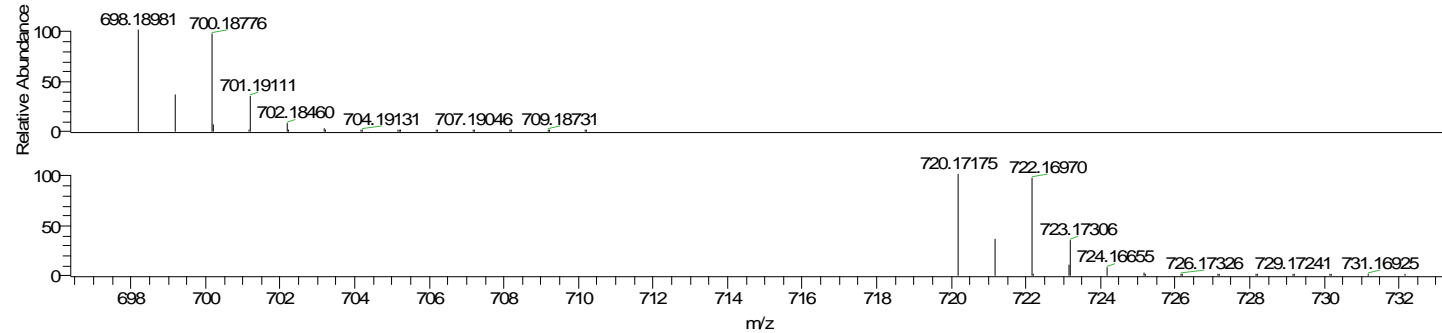

NL:  
2.80E5  
C<sub>33</sub>H<sub>44</sub>BrN<sub>3</sub>O<sub>3</sub>SSi<sub>2</sub>+H  
C<sub>33</sub>H<sub>45</sub>Br<sub>1</sub>N<sub>3</sub>O<sub>3</sub>S<sub>1</sub>Si<sub>2</sub>  
pa Chrg 1

NL:  
2.80E5  
C<sub>33</sub>H<sub>44</sub>BrN<sub>3</sub>O<sub>3</sub>SSi<sub>2</sub>+Na:  
C<sub>33</sub>H<sub>44</sub>Br<sub>1</sub>N<sub>3</sub>O<sub>3</sub>S<sub>1</sub>Si<sub>2</sub>Na<sub>1</sub>  
pa Chrg 1





$^{13}\text{C}$  NMR (125 MHz, DMSO- $d_6$ ) of Compound **31**

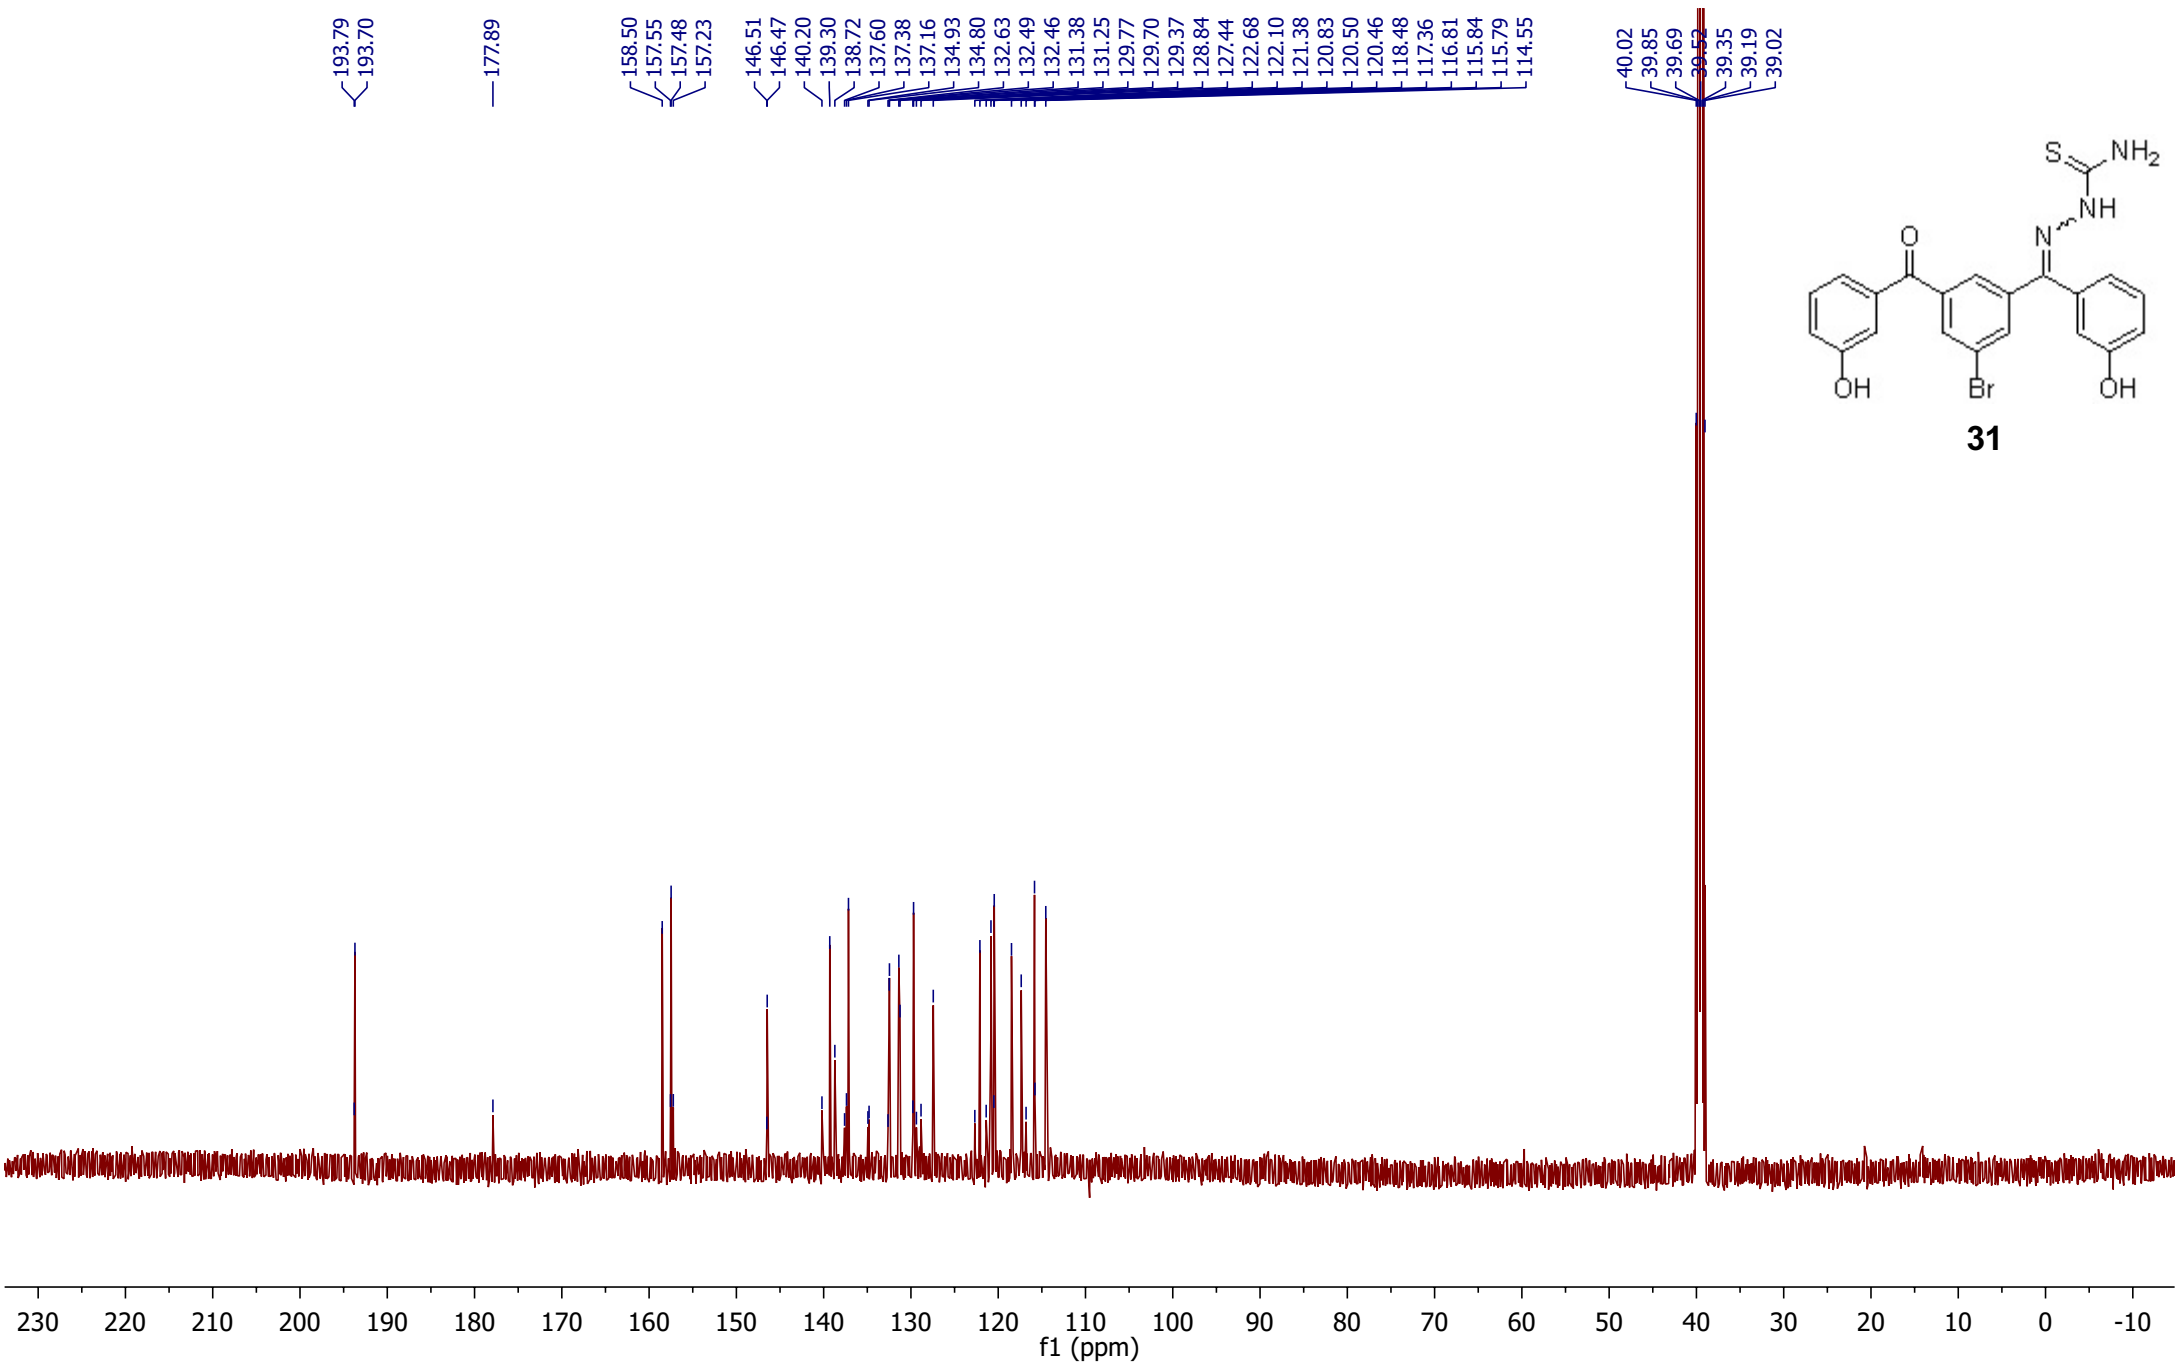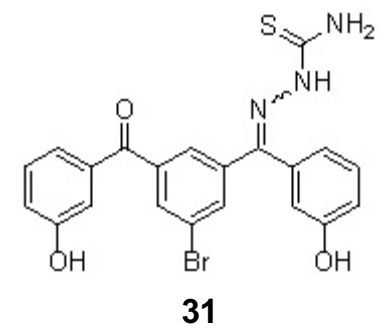

## HPLC trace for Compound 31

=====  
Acq. Operator : ERICAP  
Acq. Instrument : Instrument 1 Location : -  
Injection Date : 4/25/2014 12:32:06 PM  
Acq. Method : C:\CHEM32\1\METHODS\GRAD 2 30-90 ACN.M  
Last changed : 4/25/2014 11:52:20 AM by ERICAP  
Analysis Method : C:\CHEM32\1\DATA\ERICAP\ENPIV95000030.D\DA.M (GRAD 2 30-90 ACN.M)  
Last changed : 6/12/2014 11:21:16 PM by ERICAP  
(modified after loading)  
Sample Info : ENP-IV-95

## Method:

0-25 Min. 30:70 to 90:10 ACN:Water  
25-30 min 90:10 ACN:Water

Two peaks observed in the HPLC traces are due to the presence of both E and Z geometrical isomers.

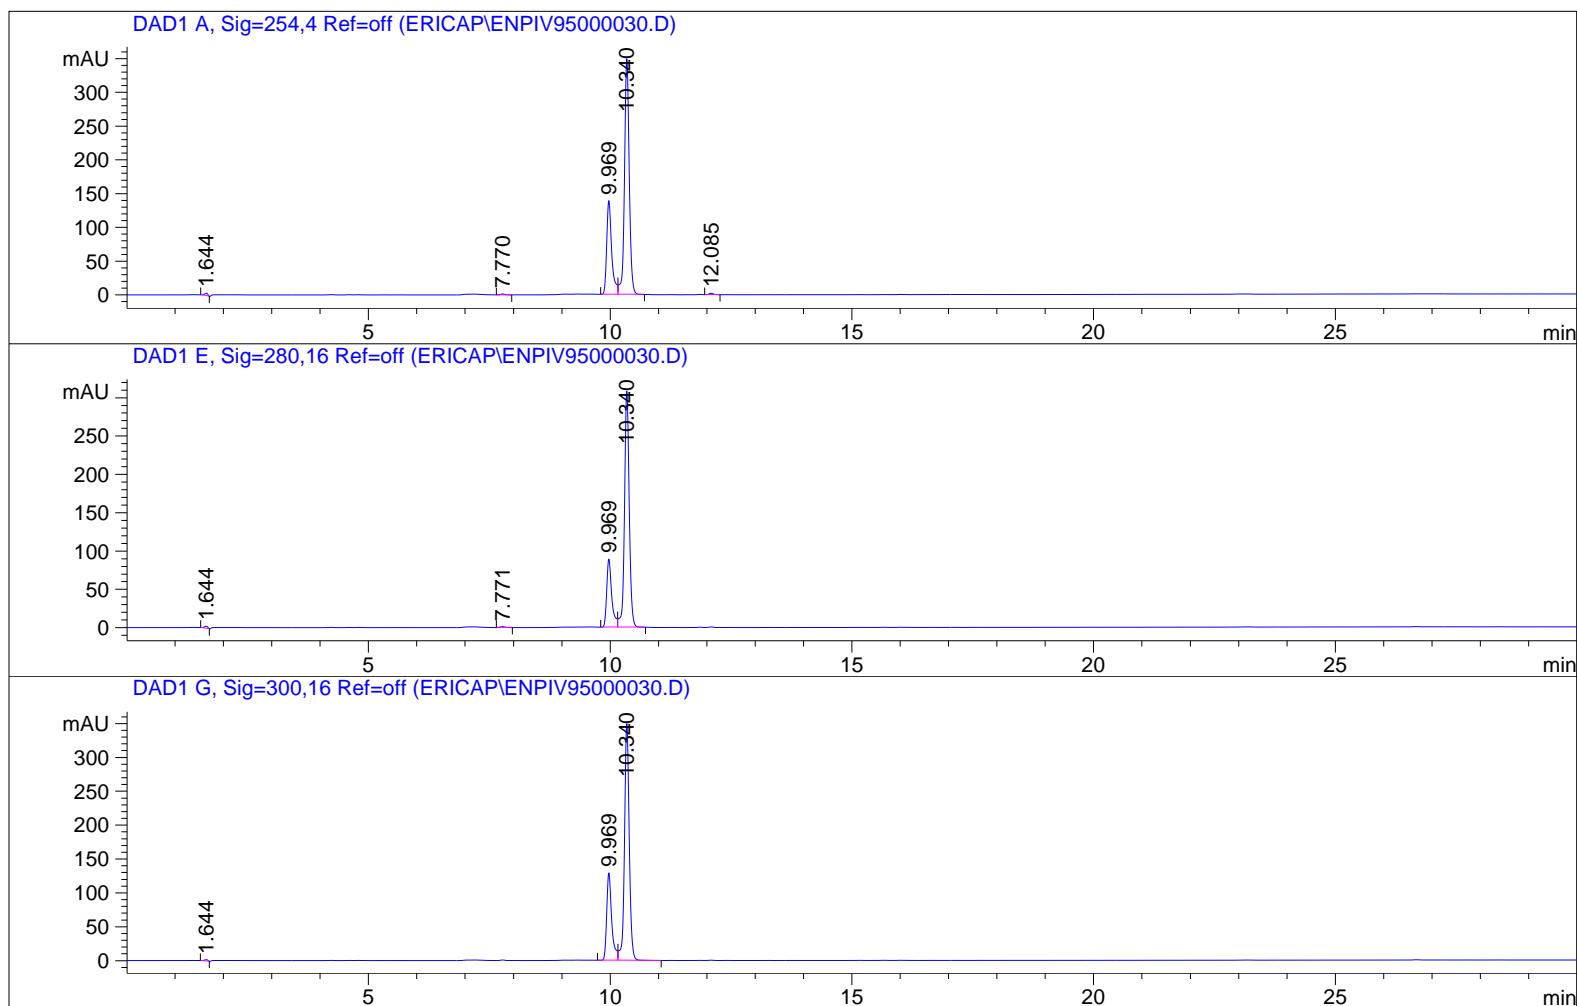

HPLC trace for Compound 31

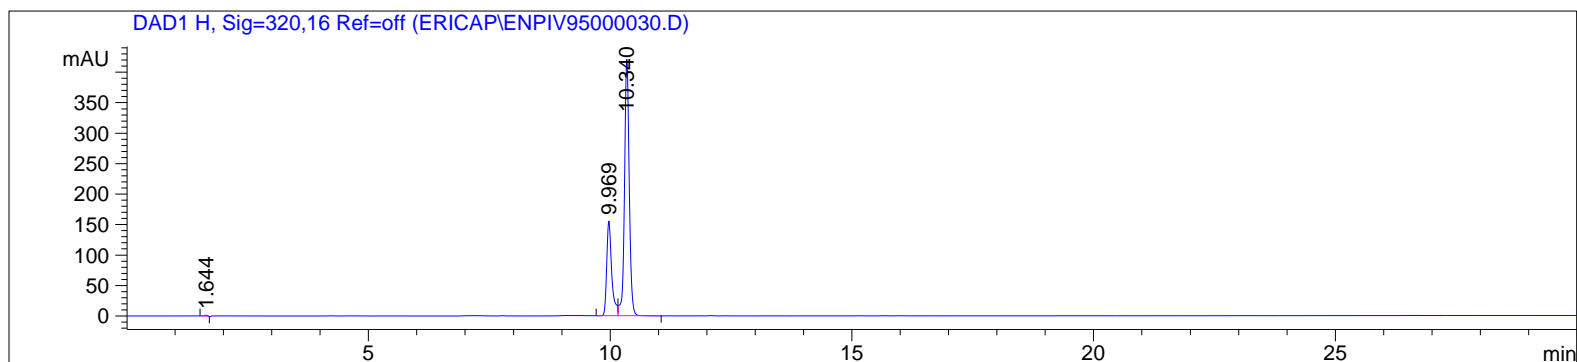

=====  
 Area Percent Report  
 =====

Sorted By : Signal  
 Multiplier : 1.0000  
 Dilution : 1.0000  
 Use Multiplier & Dilution Factor with ISTDs

Signal 1: DAD1 A, Sig=254,4 Ref=off

| Peak # | RetTime [min] | Type | Width [min] | Area [mAU*s] | Height [mAU] | Area %  |
|--------|---------------|------|-------------|--------------|--------------|---------|
| 1      | 1.644         | BB   | 0.0797      | 18.54496     | 3.74883      | 0.5430  |
| 2      | 7.770         | BB   | 0.0945      | 8.02507      | 1.29170      | 0.2350  |
| 3      | 9.969         | BV   | 0.1072      | 990.19165    | 138.85767    | 28.9947 |
| 4      | 10.340        | VB   | 0.1035      | 2384.42212   | 349.75323    | 69.8204 |
| 5      | 12.085        | VB   | 0.1052      | 13.89472     | 2.04570      | 0.4069  |

Totals : 3415.07852 495.69714

Signal 2: DAD1 E, Sig=280,16 Ref=off

| Peak # | RetTime [min] | Type | Width [min] | Area [mAU*s] | Height [mAU] | Area %  |
|--------|---------------|------|-------------|--------------|--------------|---------|
| 1      | 1.644         | BB   | 0.0797      | 13.71861     | 2.77335      | 0.4962  |
| 2      | 7.771         | BB   | 0.0939      | 7.99437      | 1.29687      | 0.2892  |
| 3      | 9.969         | BV   | 0.1083      | 644.19257    | 89.12112     | 23.3016 |
| 4      | 10.340        | VB   | 0.1033      | 2098.67676   | 308.57321    | 75.9130 |

Totals : 2764.58229 401.76455

Signal 3: DAD1 G, Sig=300,16 Ref=off

| Peak # | RetTime [min] | Type | Width [min] | Area [mAU*s] | Height [mAU] | Area %  |
|--------|---------------|------|-------------|--------------|--------------|---------|
| 1      | 1.644         | BB   | 0.0807      | 10.21376     | 2.02849      | 0.3066  |
| 2      | 9.969         | BV   | 0.1077      | 926.89996    | 129.25491    | 27.8197 |
| 3      | 10.340        | VB   | 0.1038      | 2394.69263   | 350.12573    | 71.8737 |

HPLC trace for Compound 31

Totals : 3331.80635 481.40913

Signal 4: DAD1 H, Sig=320,16 Ref=off

| Peak # | RetTime [min] | Type | Width [min] | Area [mAU*s] | Height [mAU] | Area %  |
|--------|---------------|------|-------------|--------------|--------------|---------|
| 1      | 1.644         | BB   | 0.0818      | 9.08203      | 1.77197      | 0.2265  |
| 2      | 9.969         | BV   | 0.1078      | 1116.46643   | 155.51645    | 27.8403 |
| 3      | 10.340        | VB   | 0.1038      | 2884.70776   | 421.56287    | 71.9333 |

Totals : 4010.25623 578.85129

=====  
\*\*\* End of Report \*\*\*

# HRMS (ESI) for Compound 31

C:\Xcalibur\...\ENP\_IV\_95\_Orbi\_+ESI\_+esi

3/7/2014 3:00:04 PM

ENP\_IV\_95\_Orbi\_+ESI\_+esi #3-11 RT: 0.02-0.09 AV: 9 NL: 1.17E7  
T: FTMS + p ESI Full ms [150.00-2000.00]

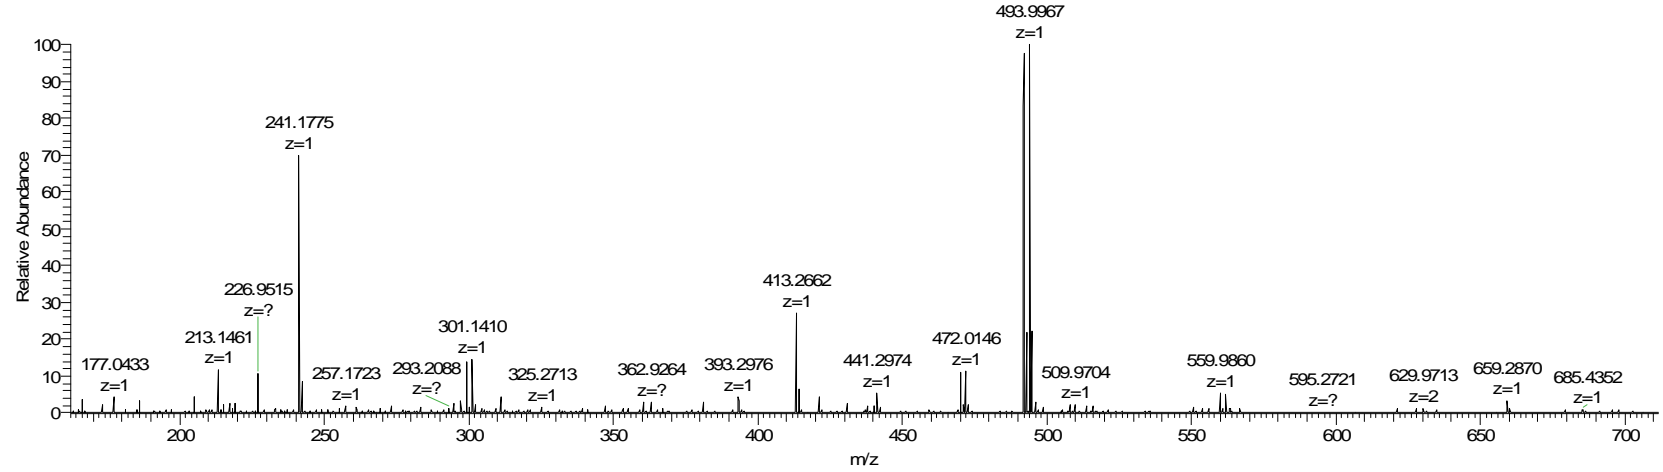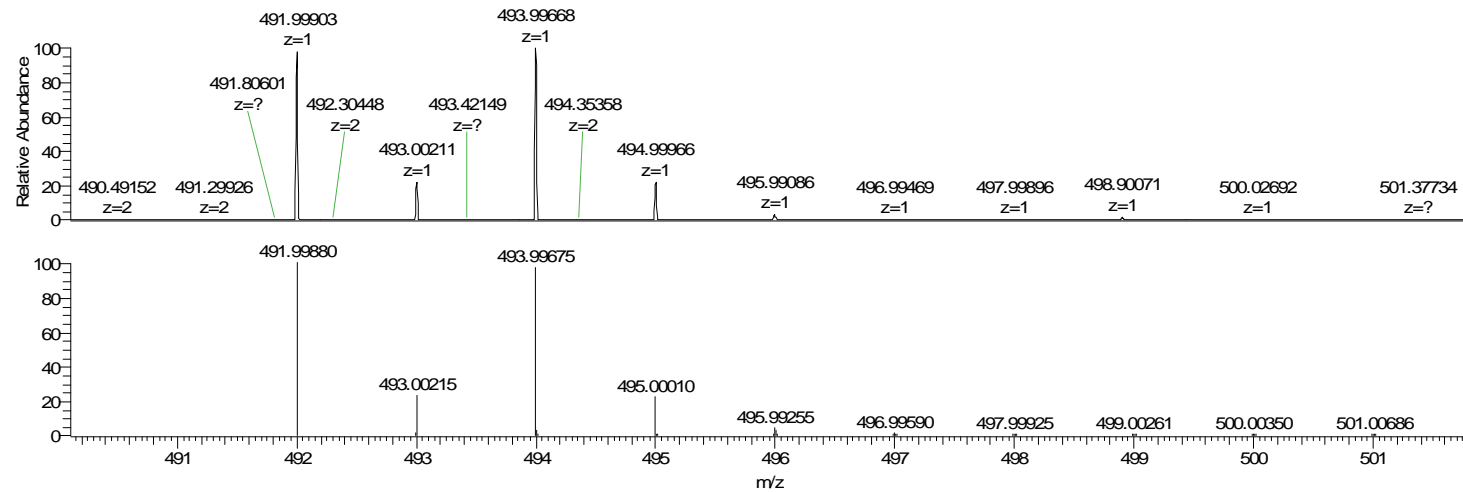

NL:  
1.17E7  
ENP\_IV\_95\_Orbi\_+ESI\_+  
esi#3-11 RT: 0.02-0.09  
AV: 9 T: FTMS + p ESI  
Full ms [150.00-2000.00]

NL:  
3.76E5  
C<sub>21</sub>H<sub>16</sub>BrN<sub>3</sub>O<sub>3</sub>S+Na  
C<sub>21</sub>H<sub>16</sub>Br<sub>1</sub>N<sub>3</sub>O<sub>3</sub>S<sub>1</sub>Na<sub>1</sub>  
pa Chrg 1

<sup>1</sup>H NMR (500 MHz, Acetone-d<sub>6</sub>) of Compound **32**

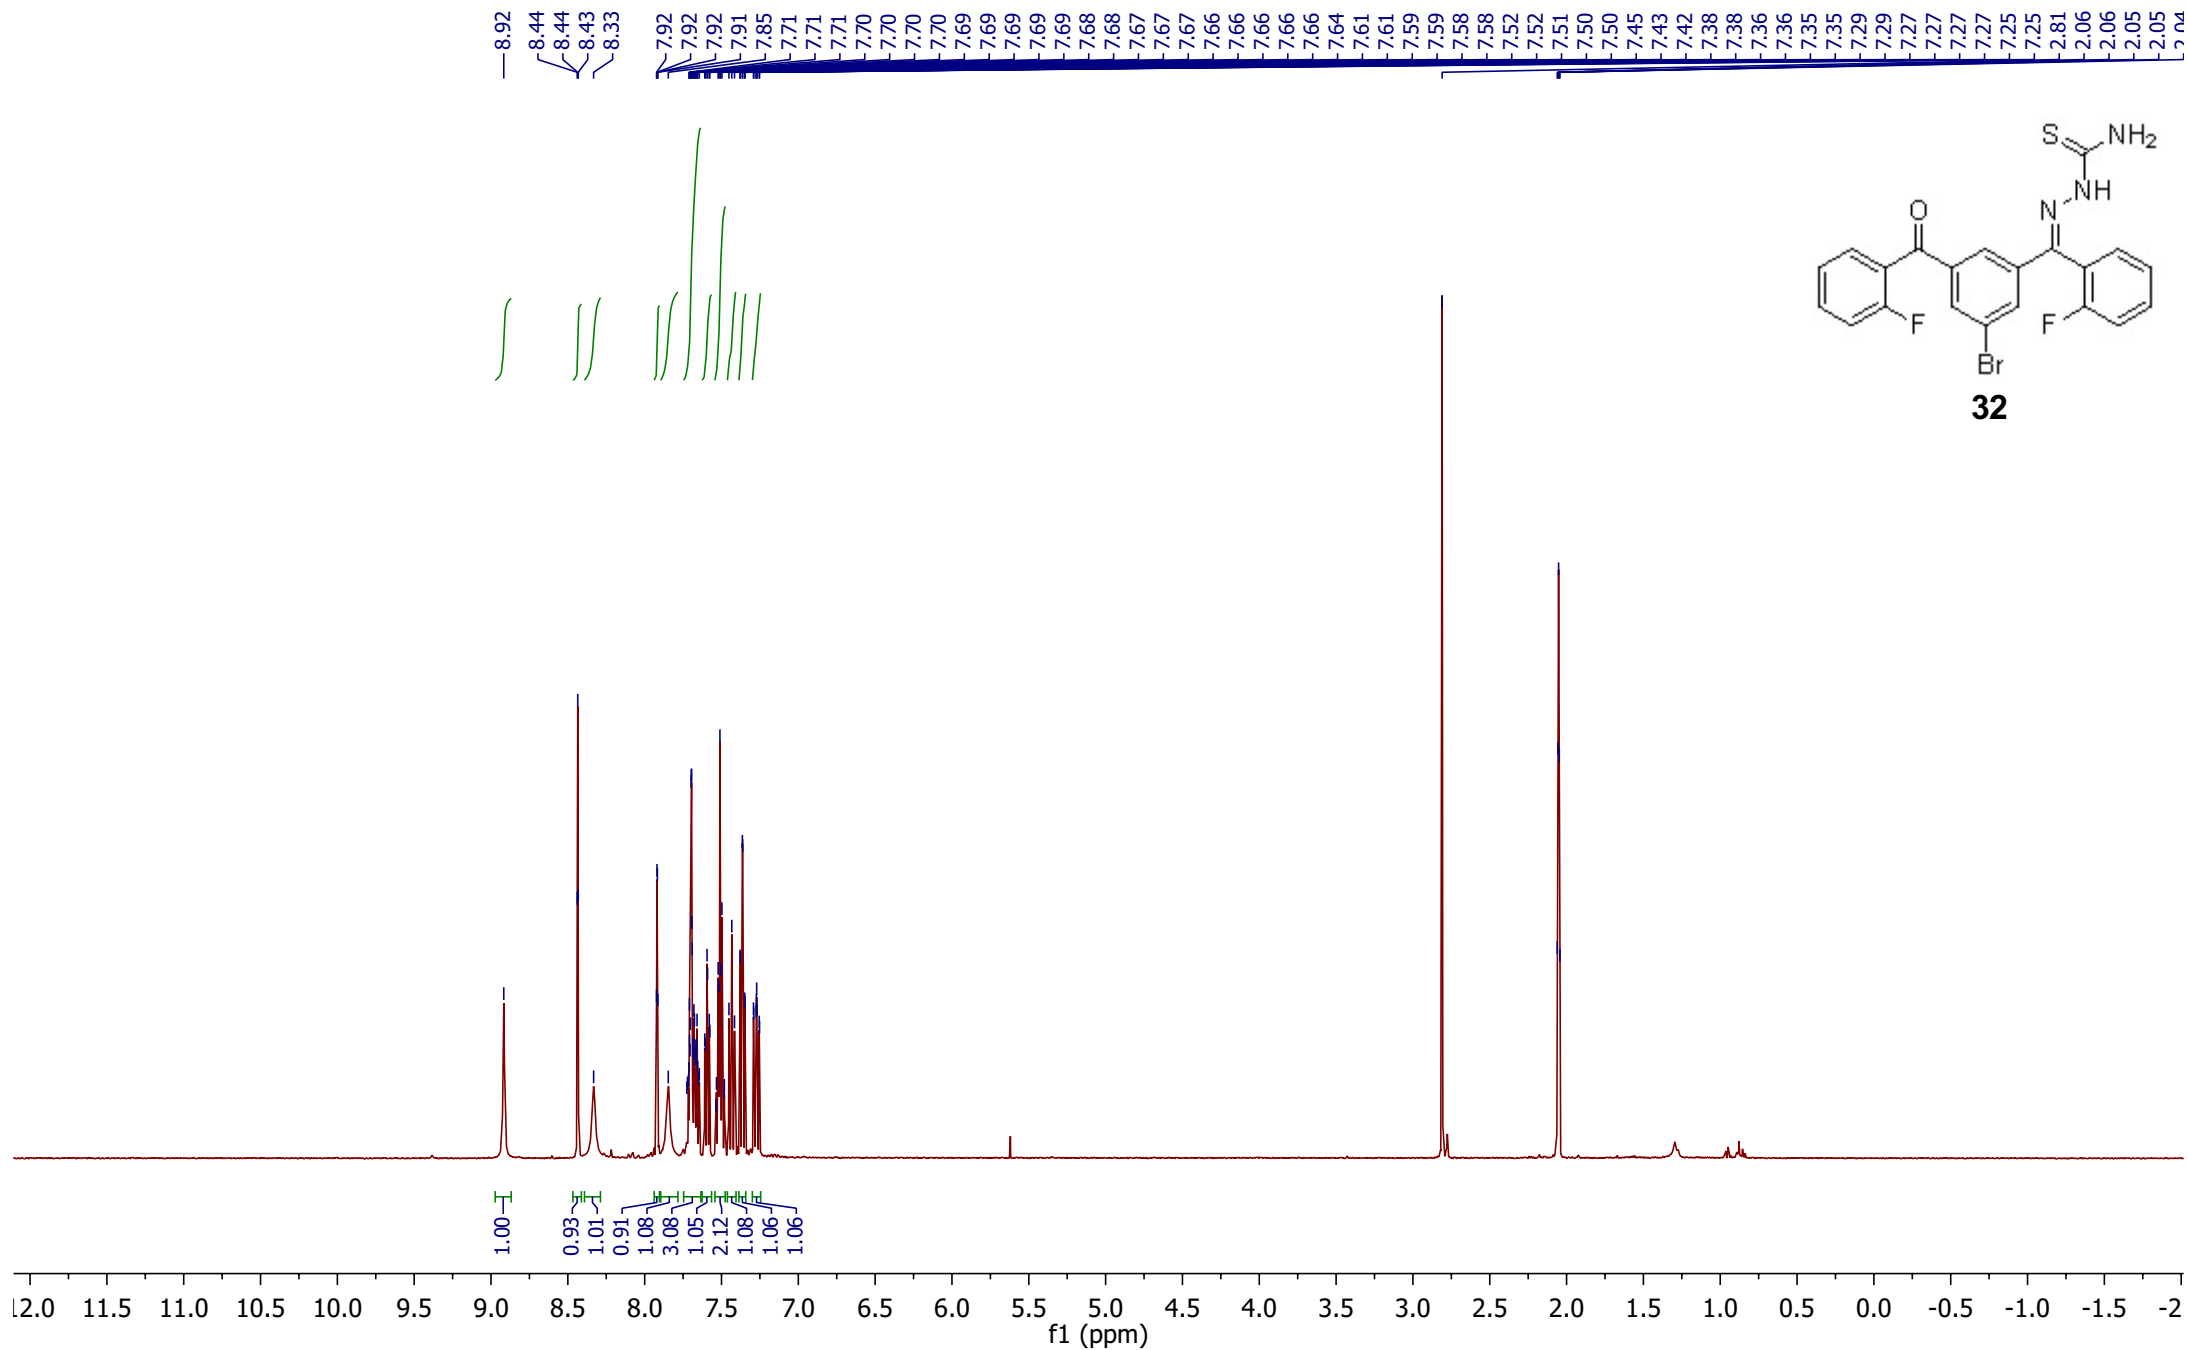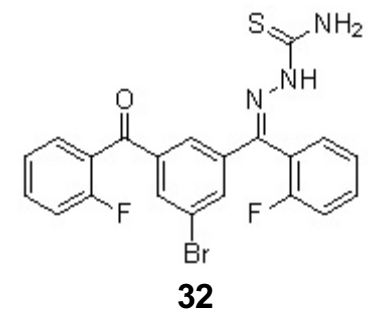

$^1\text{H}$  NMR (400 MHz, Acetone- $\text{d}_6$ ,  $^{19}\text{F}$  decoupled) of Compound **32**

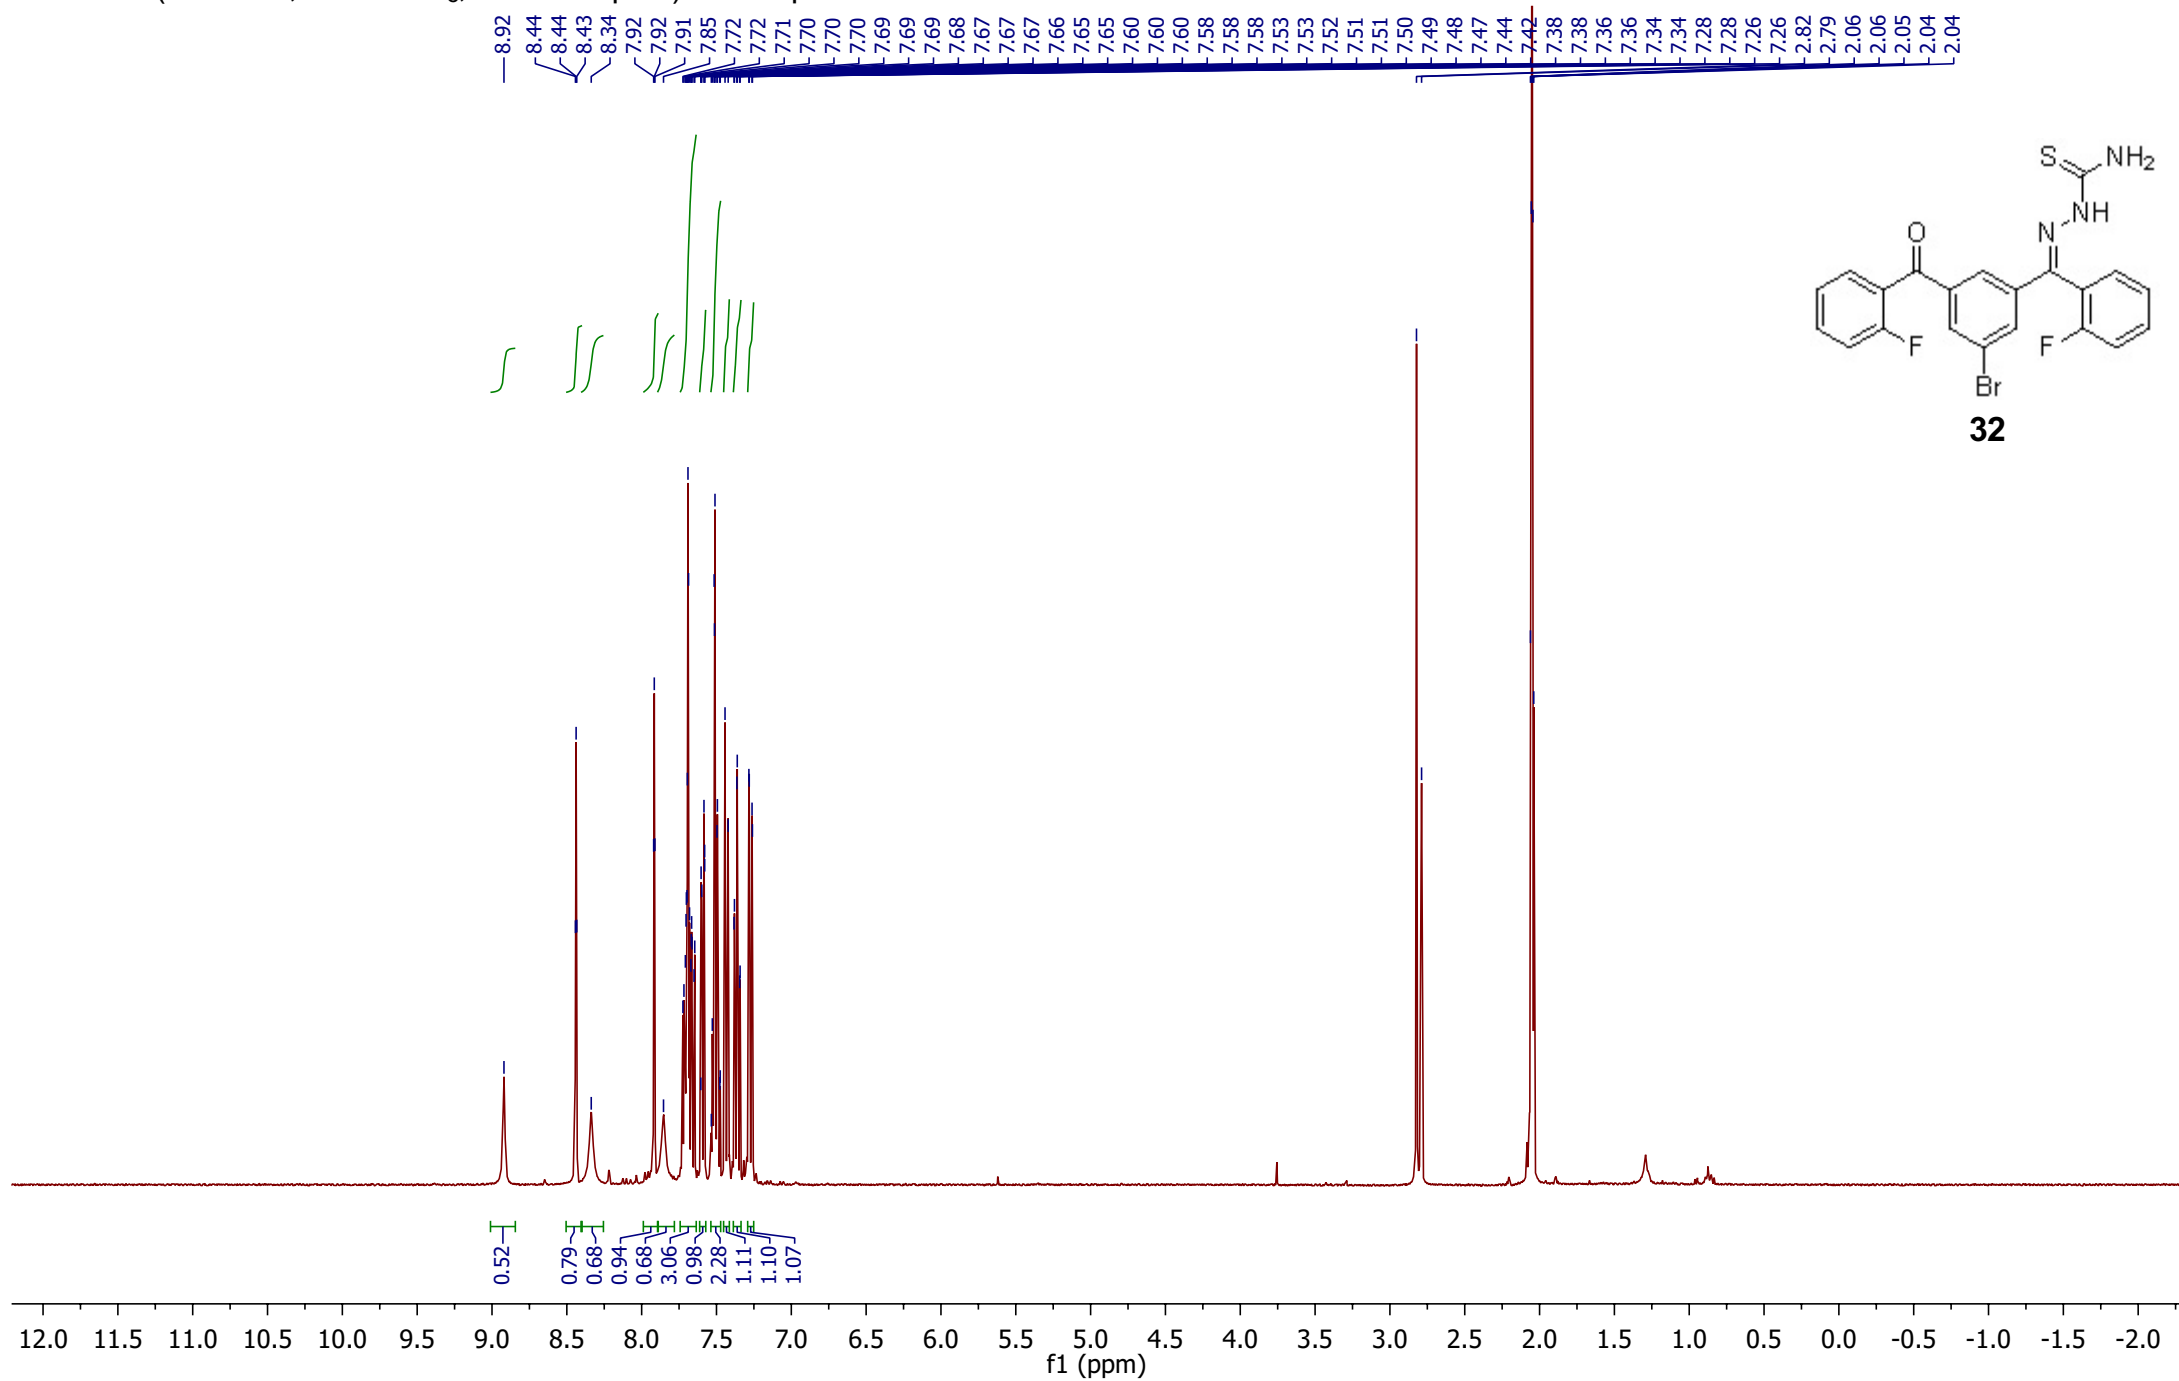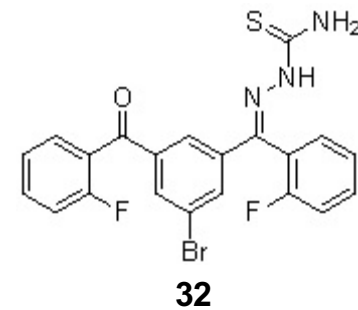

$^1\text{H}$  NMR (600 MHz, Acetone- $\text{d}_6$ ) of Compound **32** at various time intervals

0 h in Acetone- $\text{d}_6$

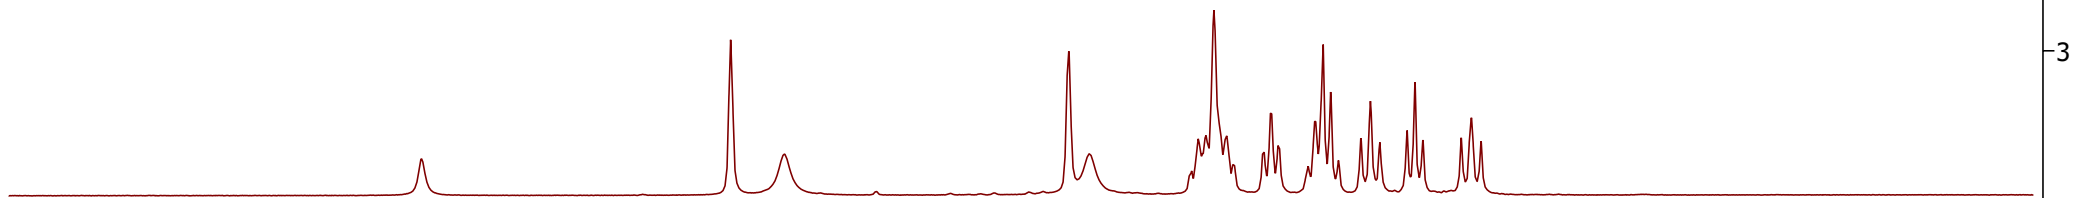

24 h in Acetone- $\text{d}_6$

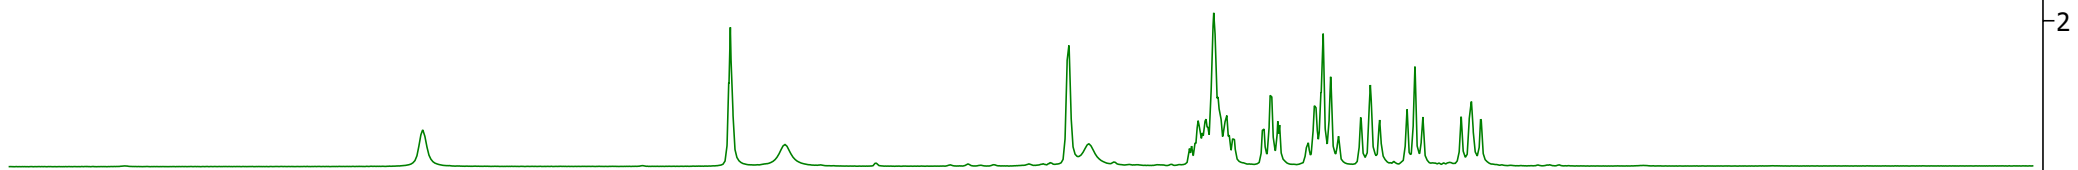

1 week in Acetone- $\text{d}_6$

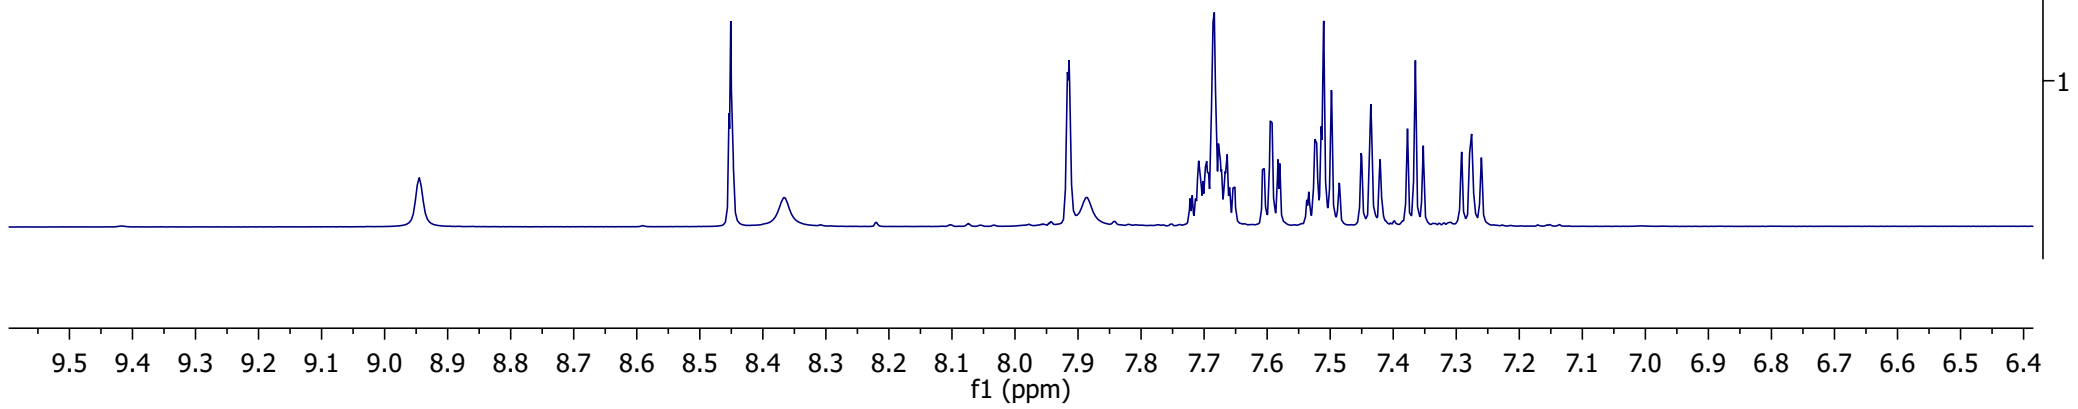



<sup>13</sup>C NMR (125 MHz, Acetone-d<sub>6</sub>) of Compound **32**

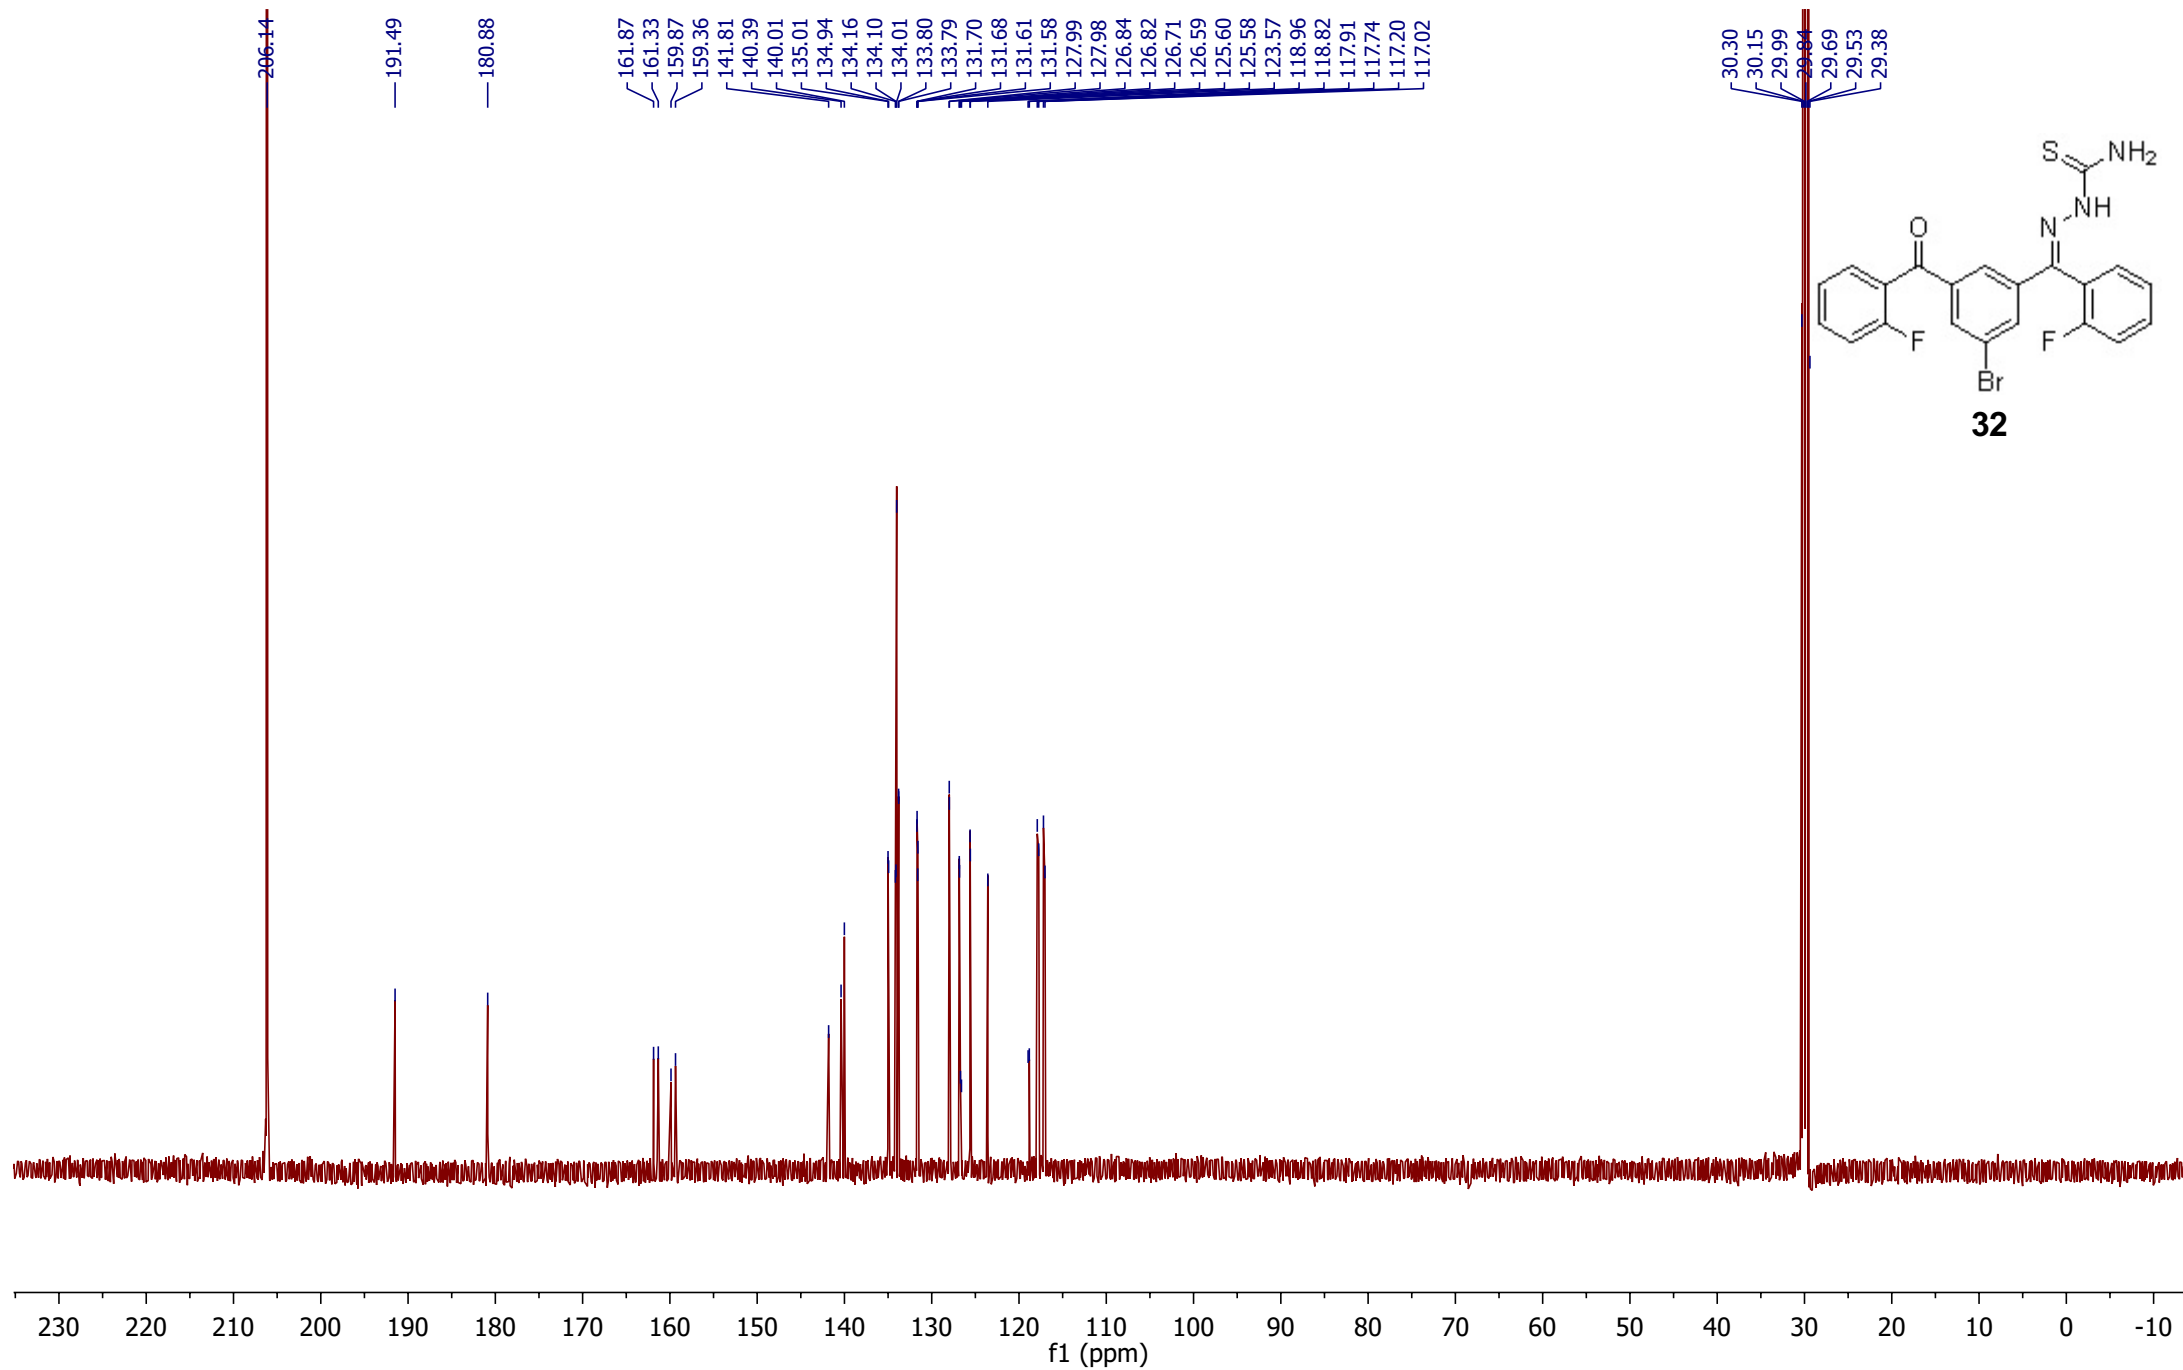

$^{19}\text{F}$  NMR (470 MHz, Acetone- $\text{d}_6$ ) of Compound **32**

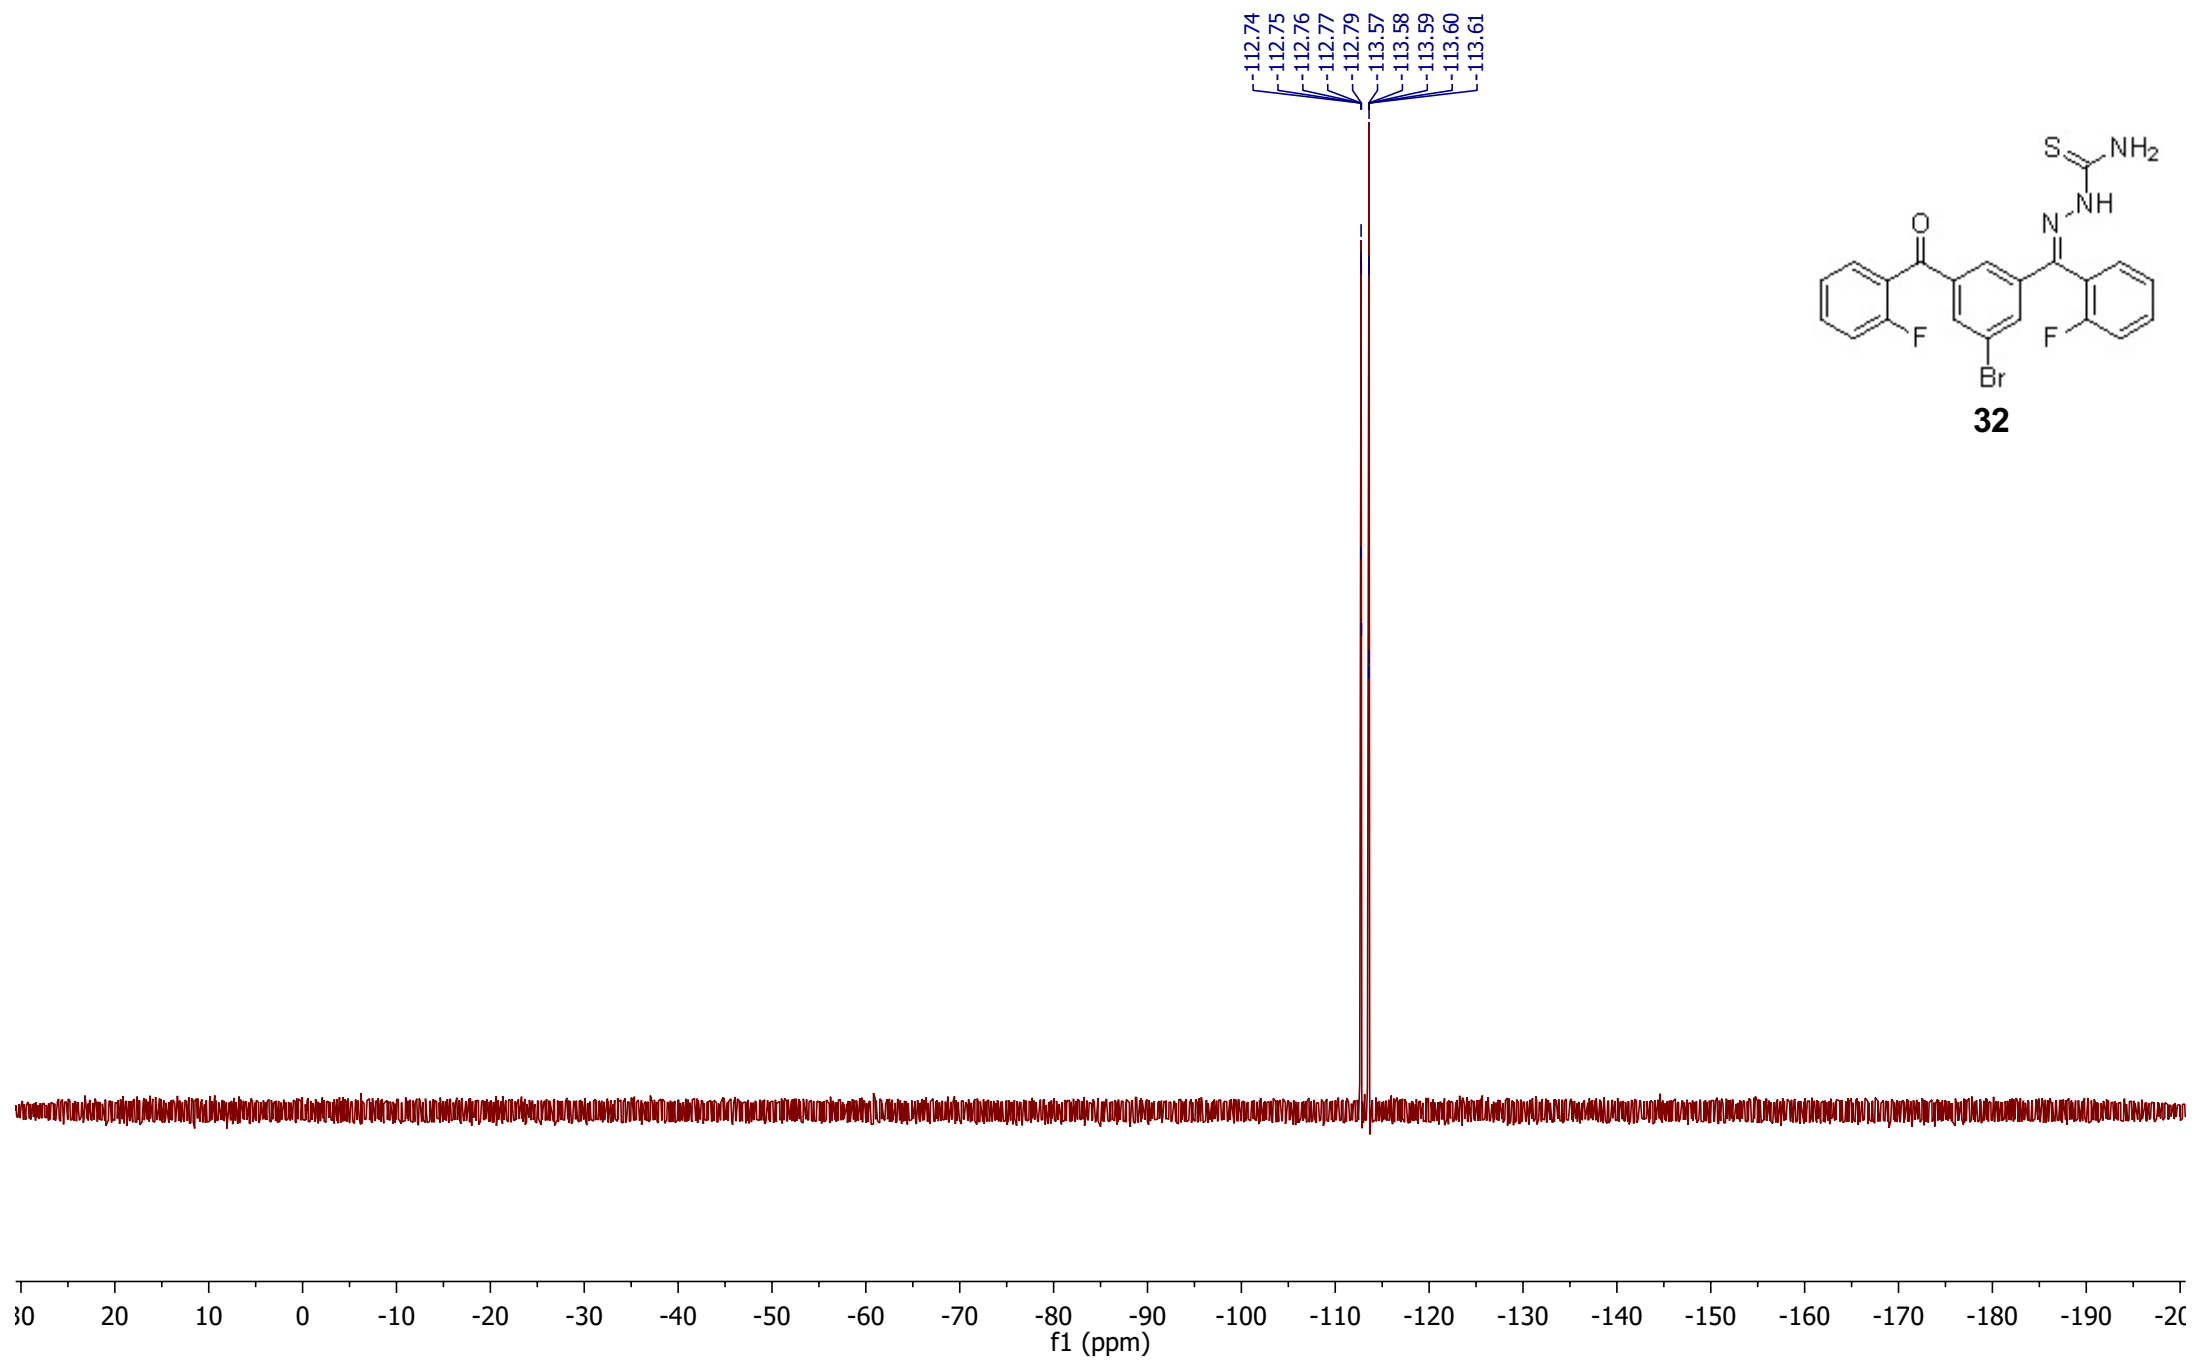

COSYGPSW (400 MHz, Acetone-d<sub>6</sub>) of Compound **32**

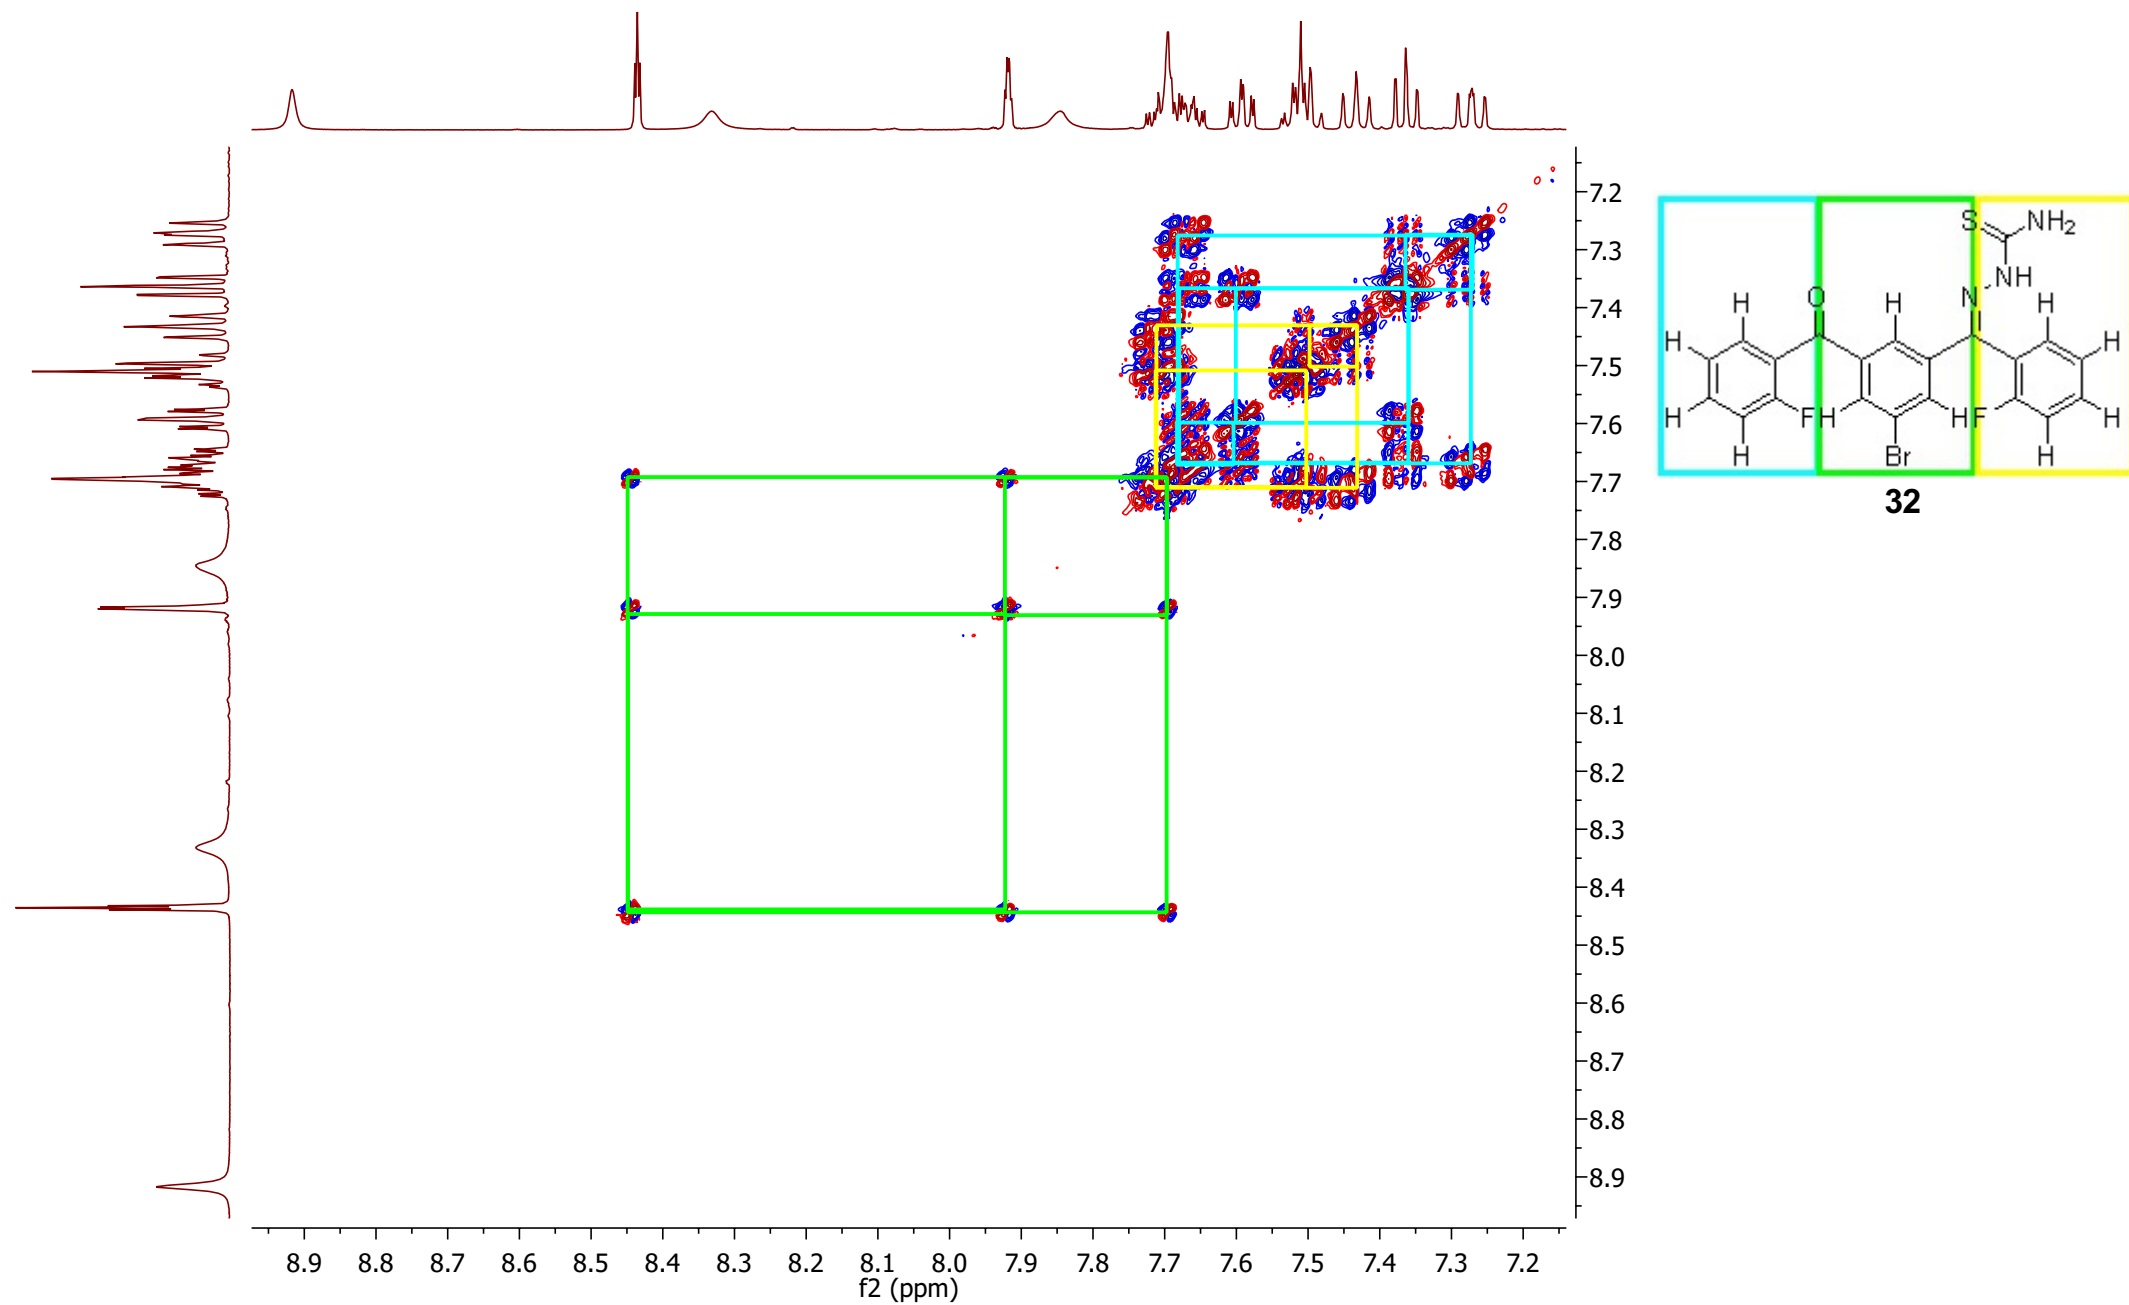

NOESYPHSW (400 MHz, Acetone-d<sub>6</sub>) of Compound **32**

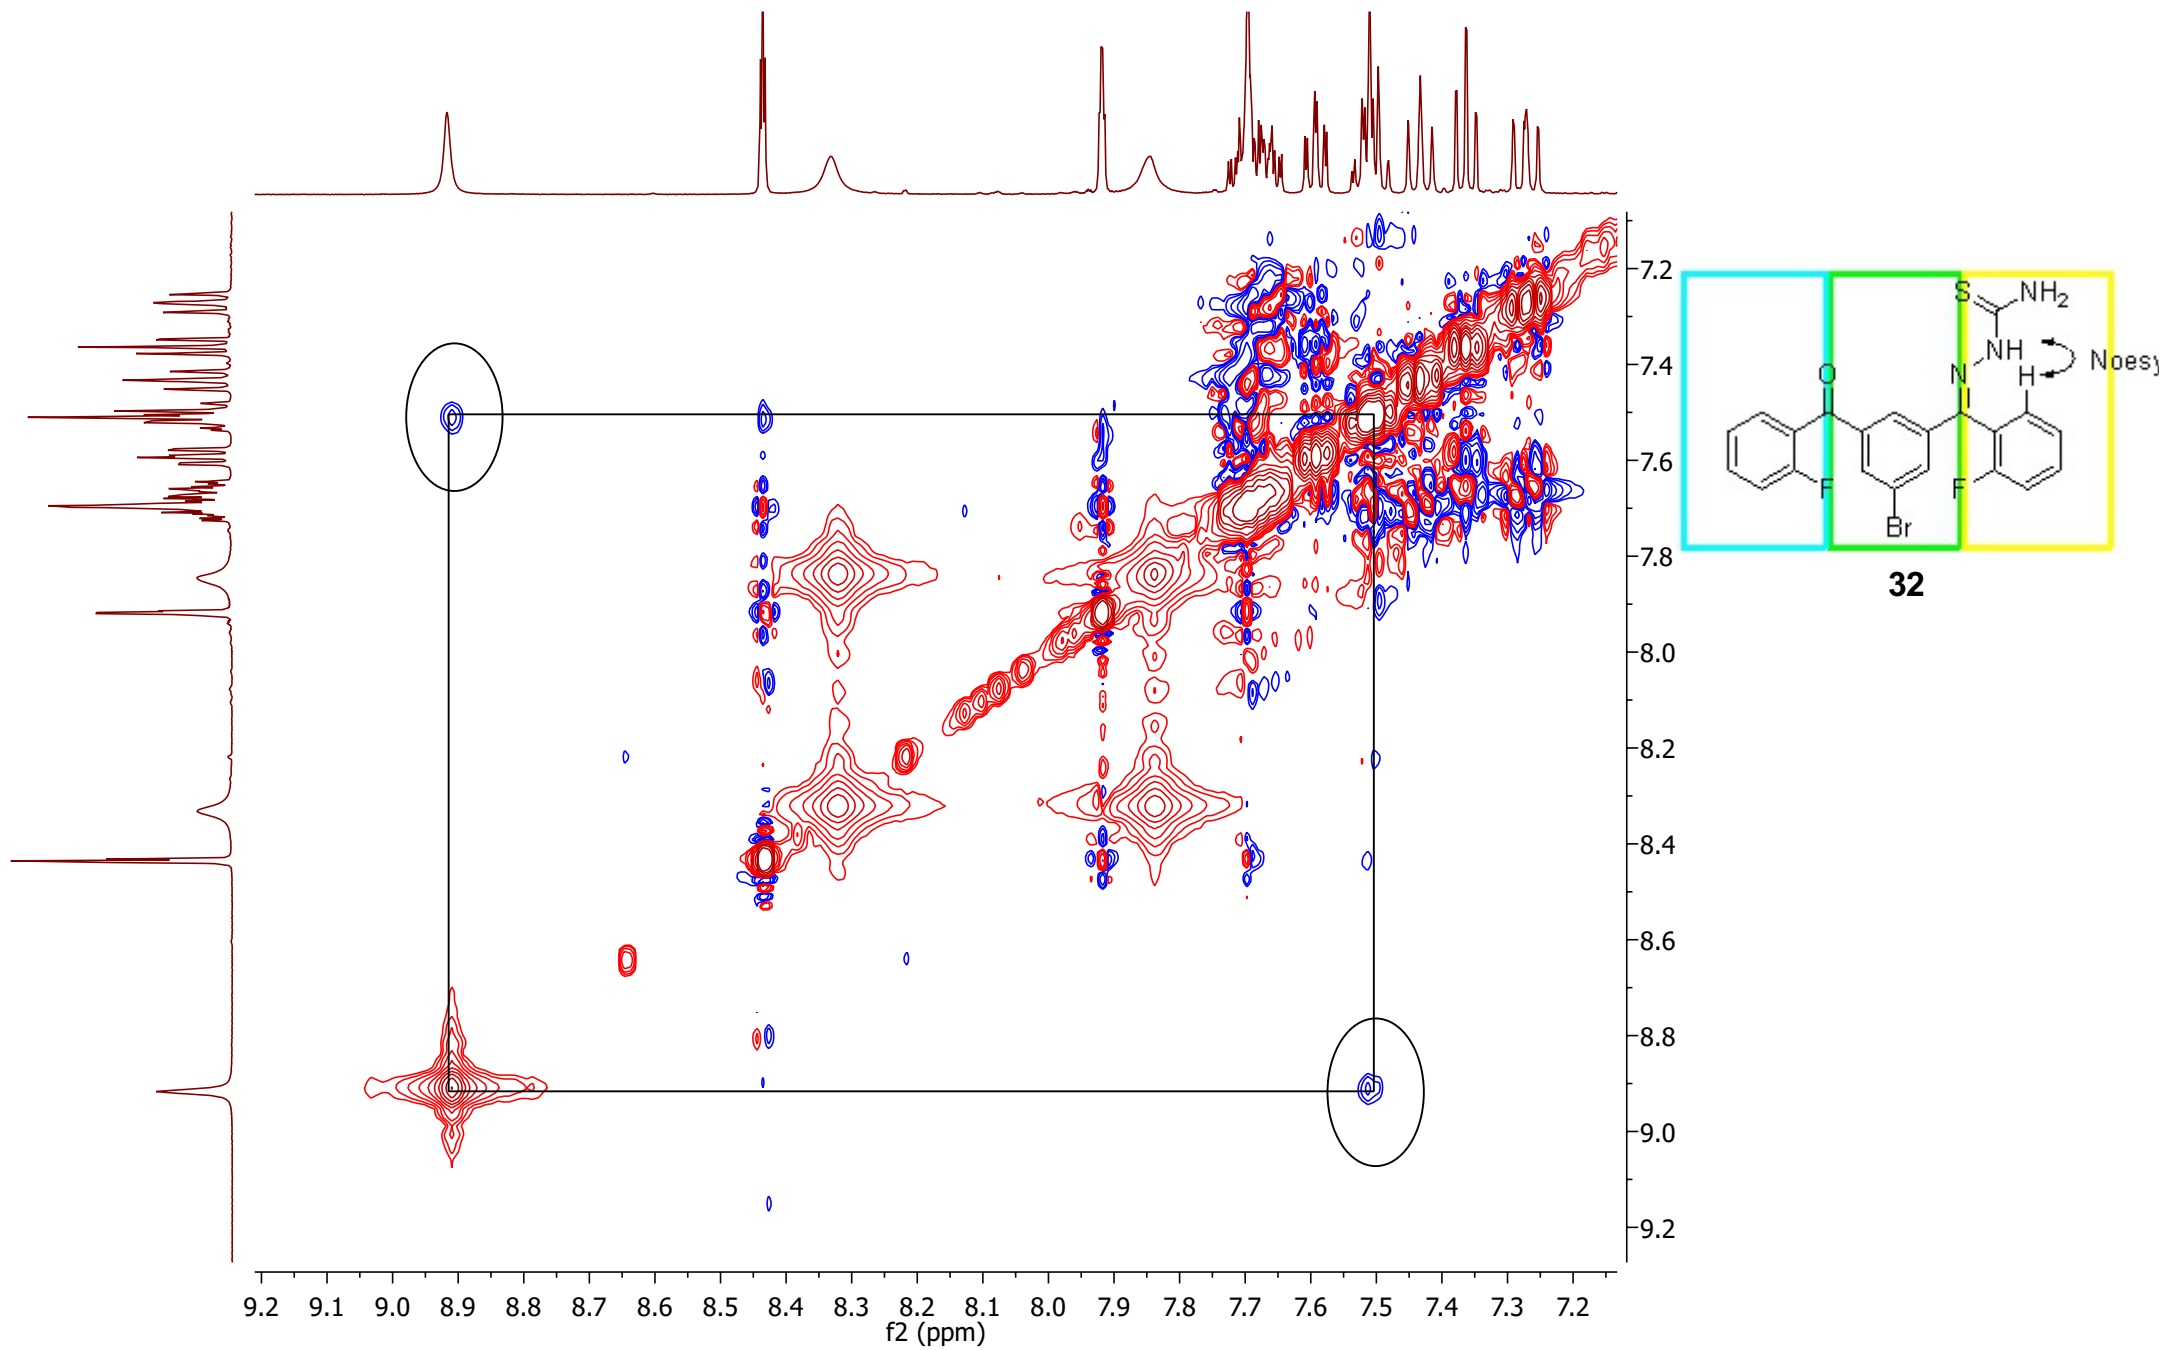

### HPLC trace for Compound 32

=====

Acq. Operator : ERICAP  
Acq. Instrument : Instrument 1 Location : -  
Injection Date : 1/19/2015 9:23:47 PM  
Acq. Method : C:\CHEM32\1\METHODS\GRAD 2 50-90 ACN.M  
Last changed : 1/19/2015 9:20:17 PM by ERICAP  
Analysis Method : C:\CHEM32\1\DATA\ERICAP\\_ENP\_1\_15100002.D\DA.M (GRAD 2 50-90 ACN.M)  
Last changed : 1/30/2015 12:11:43 AM by ERICAP  
(modified after loading)  
Sample Info : ENP\_1\_151

Method:

0-25 min gradient 50:50 to 90:10 ACN:Water  
25-30 min isocratic 90:10 ACN:Water

Isolated as the Z geometrical isomer as shown in the H NMR spectra. Only one peak observed in the HPLC trace.

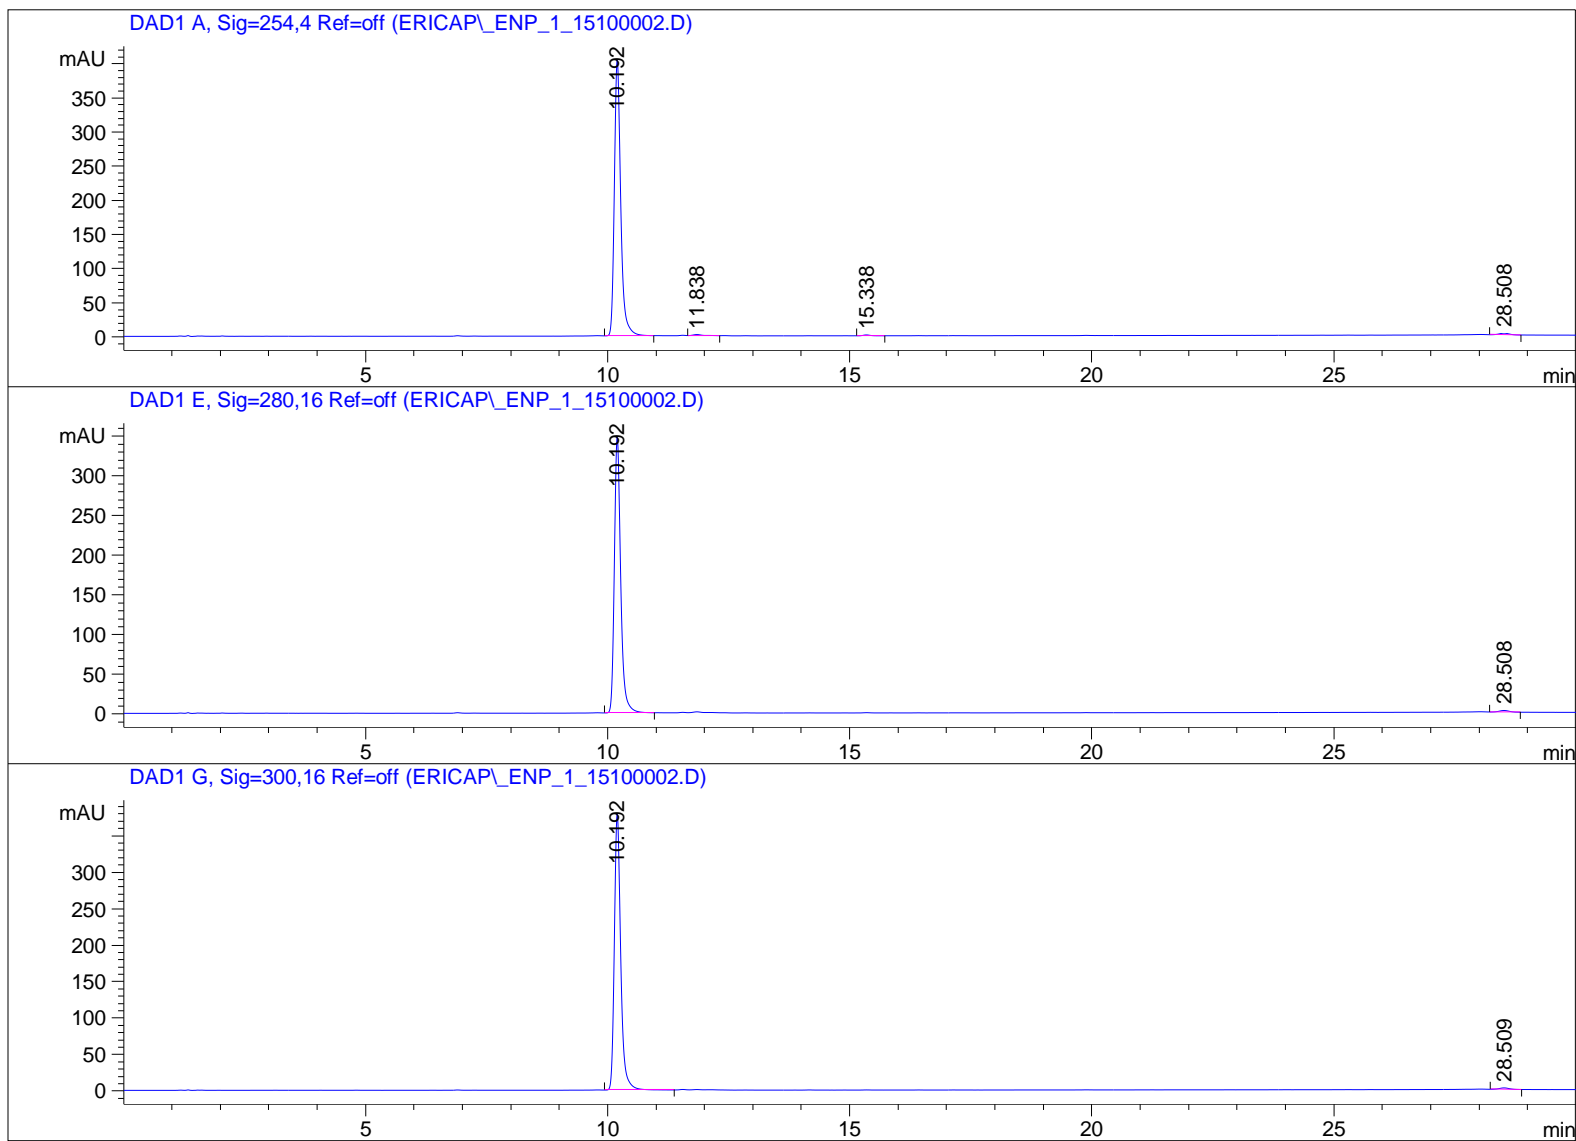

HPLC trace for Compound 32

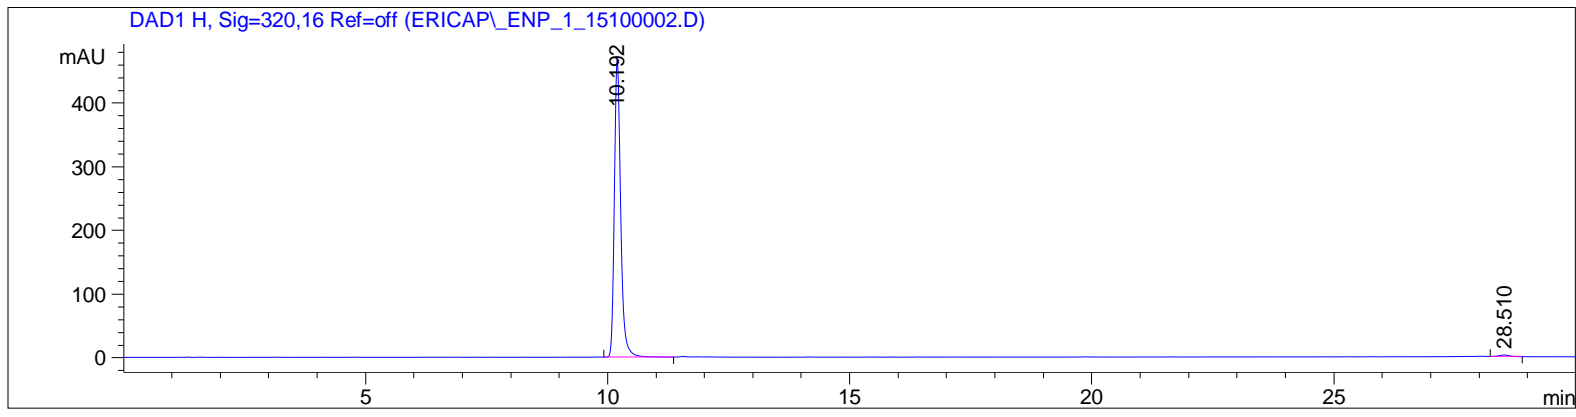

=====  
 Area Percent Report  
 =====

Sorted By : Signal  
 Multiplier : 1.0000  
 Dilution : 1.0000  
 Use Multiplier & Dilution Factor with ISTDs

Signal 1: DAD1 A, Sig=254,4 Ref=off

| Peak # | RetTime [min] | Type | Width [min] | Area [mAU*s] | Height [mAU] | Area %  |
|--------|---------------|------|-------------|--------------|--------------|---------|
| 1      | 10.192        | BB   | 0.1385      | 3686.86572   | 404.02744    | 98.1430 |
| 2      | 11.838        | VB   | 0.2041      | 23.26824     | 1.65460      | 0.6194  |
| 3      | 15.338        | BB   | 0.1492      | 12.01820     | 1.23878      | 0.3199  |
| 4      | 28.508        | BB   | 0.2201      | 34.47456     | 2.45158      | 0.9177  |

Totals : 3756.62673 409.37240

Signal 2: DAD1 E, Sig=280,16 Ref=off

| Peak # | RetTime [min] | Type | Width [min] | Area [mAU*s] | Height [mAU] | Area %  |
|--------|---------------|------|-------------|--------------|--------------|---------|
| 1      | 10.192        | BB   | 0.1377      | 3154.12451   | 347.99039    | 99.1103 |
| 2      | 28.508        | BB   | 0.2158      | 28.31306     | 2.01687      | 0.8897  |

Totals : 3182.43758 350.00725

HPLC trace for Compound 32

Signal 3: DAD1 G, Sig=300,16 Ref=off

| Peak # | RetTime [min] | Type | Width [min] | Area [mAU*s] | Height [mAU] | Area %  |
|--------|---------------|------|-------------|--------------|--------------|---------|
| 1      | 10.192        | BB   | 0.1383      | 3453.58618   | 379.02155    | 99.1981 |
| 2      | 28.509        | BB   | 0.2169      | 27.91662     | 1.99900      | 0.8019  |

Totals : 3481.50280 381.02055

Signal 4: DAD1 H, Sig=320,16 Ref=off

| Peak # | RetTime [min] | Type | Width [min] | Area [mAU*s] | Height [mAU] | Area %  |
|--------|---------------|------|-------------|--------------|--------------|---------|
| 1      | 10.192        | BB   | 0.1377      | 4249.60937   | 468.87698    | 99.1954 |
| 2      | 28.510        | BB   | 0.2149      | 34.46865     | 2.46907      | 0.8046  |

Totals : 4284.07803 471.34605

=====  
\*\*\* End of Report \*\*\*

# HRMS(ESI) for Compound 32

C:\Xcalibur\...01-02-2015\ENP\_I\_151

1/2/2015 10:18:02 PM

ENP\_I\_151 #270-290 RT: 3.44-3.63 AV: 21 NL: 5.53E6  
T: FTMS + p ESI Full ms [100.00-1000.00]

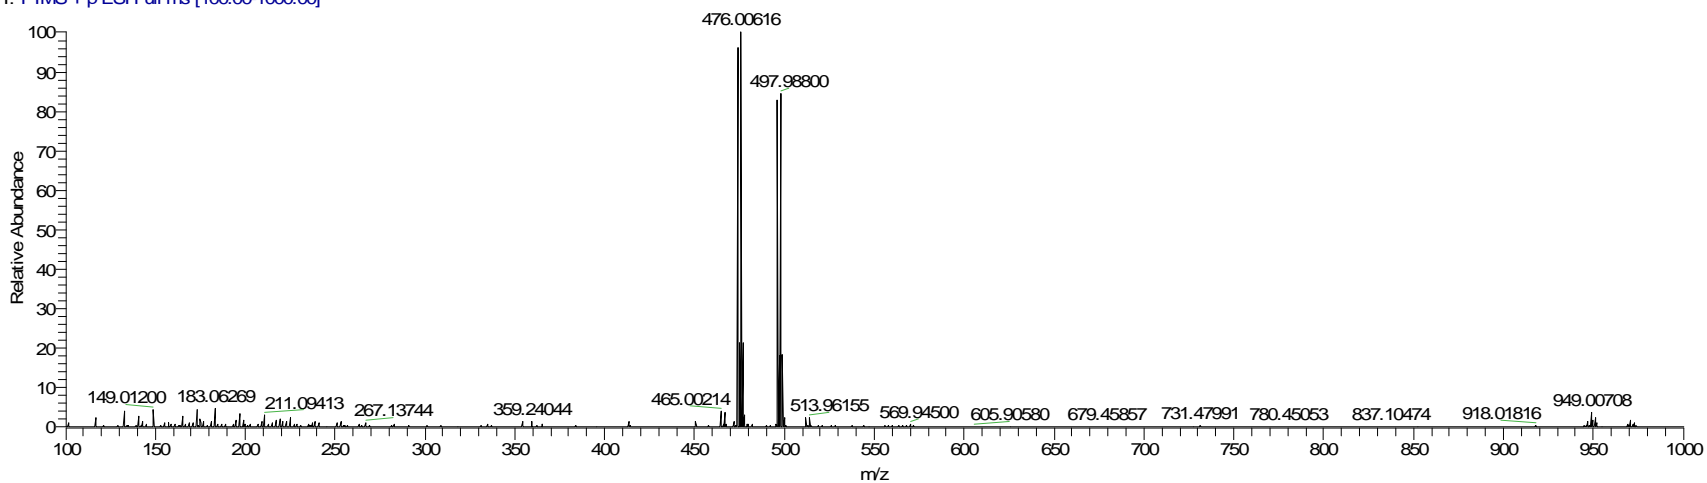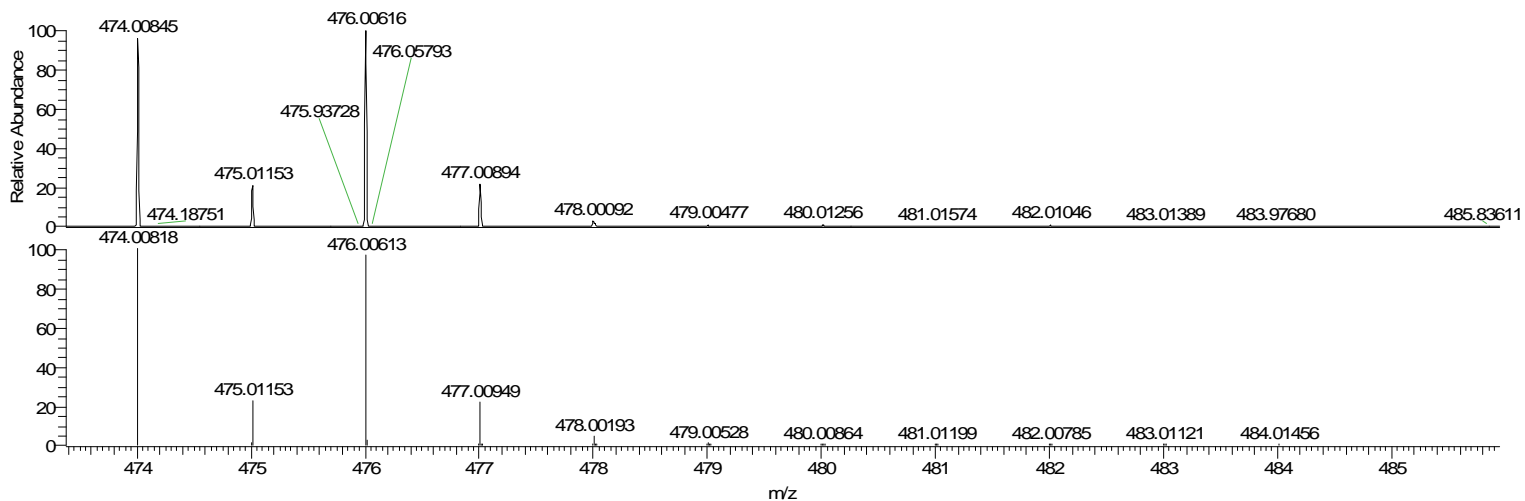

NL:  
5.53E6  
ENP\_I\_151#270-290  
RT: 3.44-3.63 AV: 21  
T: FTMS + p ESI Full  
ms [100.00-1000.00]

NL:  
3.78E5  
C<sub>21</sub>H<sub>14</sub>BrF<sub>2</sub>N<sub>3</sub>O<sub>5</sub>+H  
C<sub>21</sub>H<sub>15</sub>Br<sub>1</sub>F<sub>2</sub>N<sub>3</sub>O<sub>1</sub>S<sub>1</sub>  
pa Chrg 1



<sup>1</sup>H NMR (500 MHz, DMSO-d<sub>6</sub>) at 0 h for Compound **33**

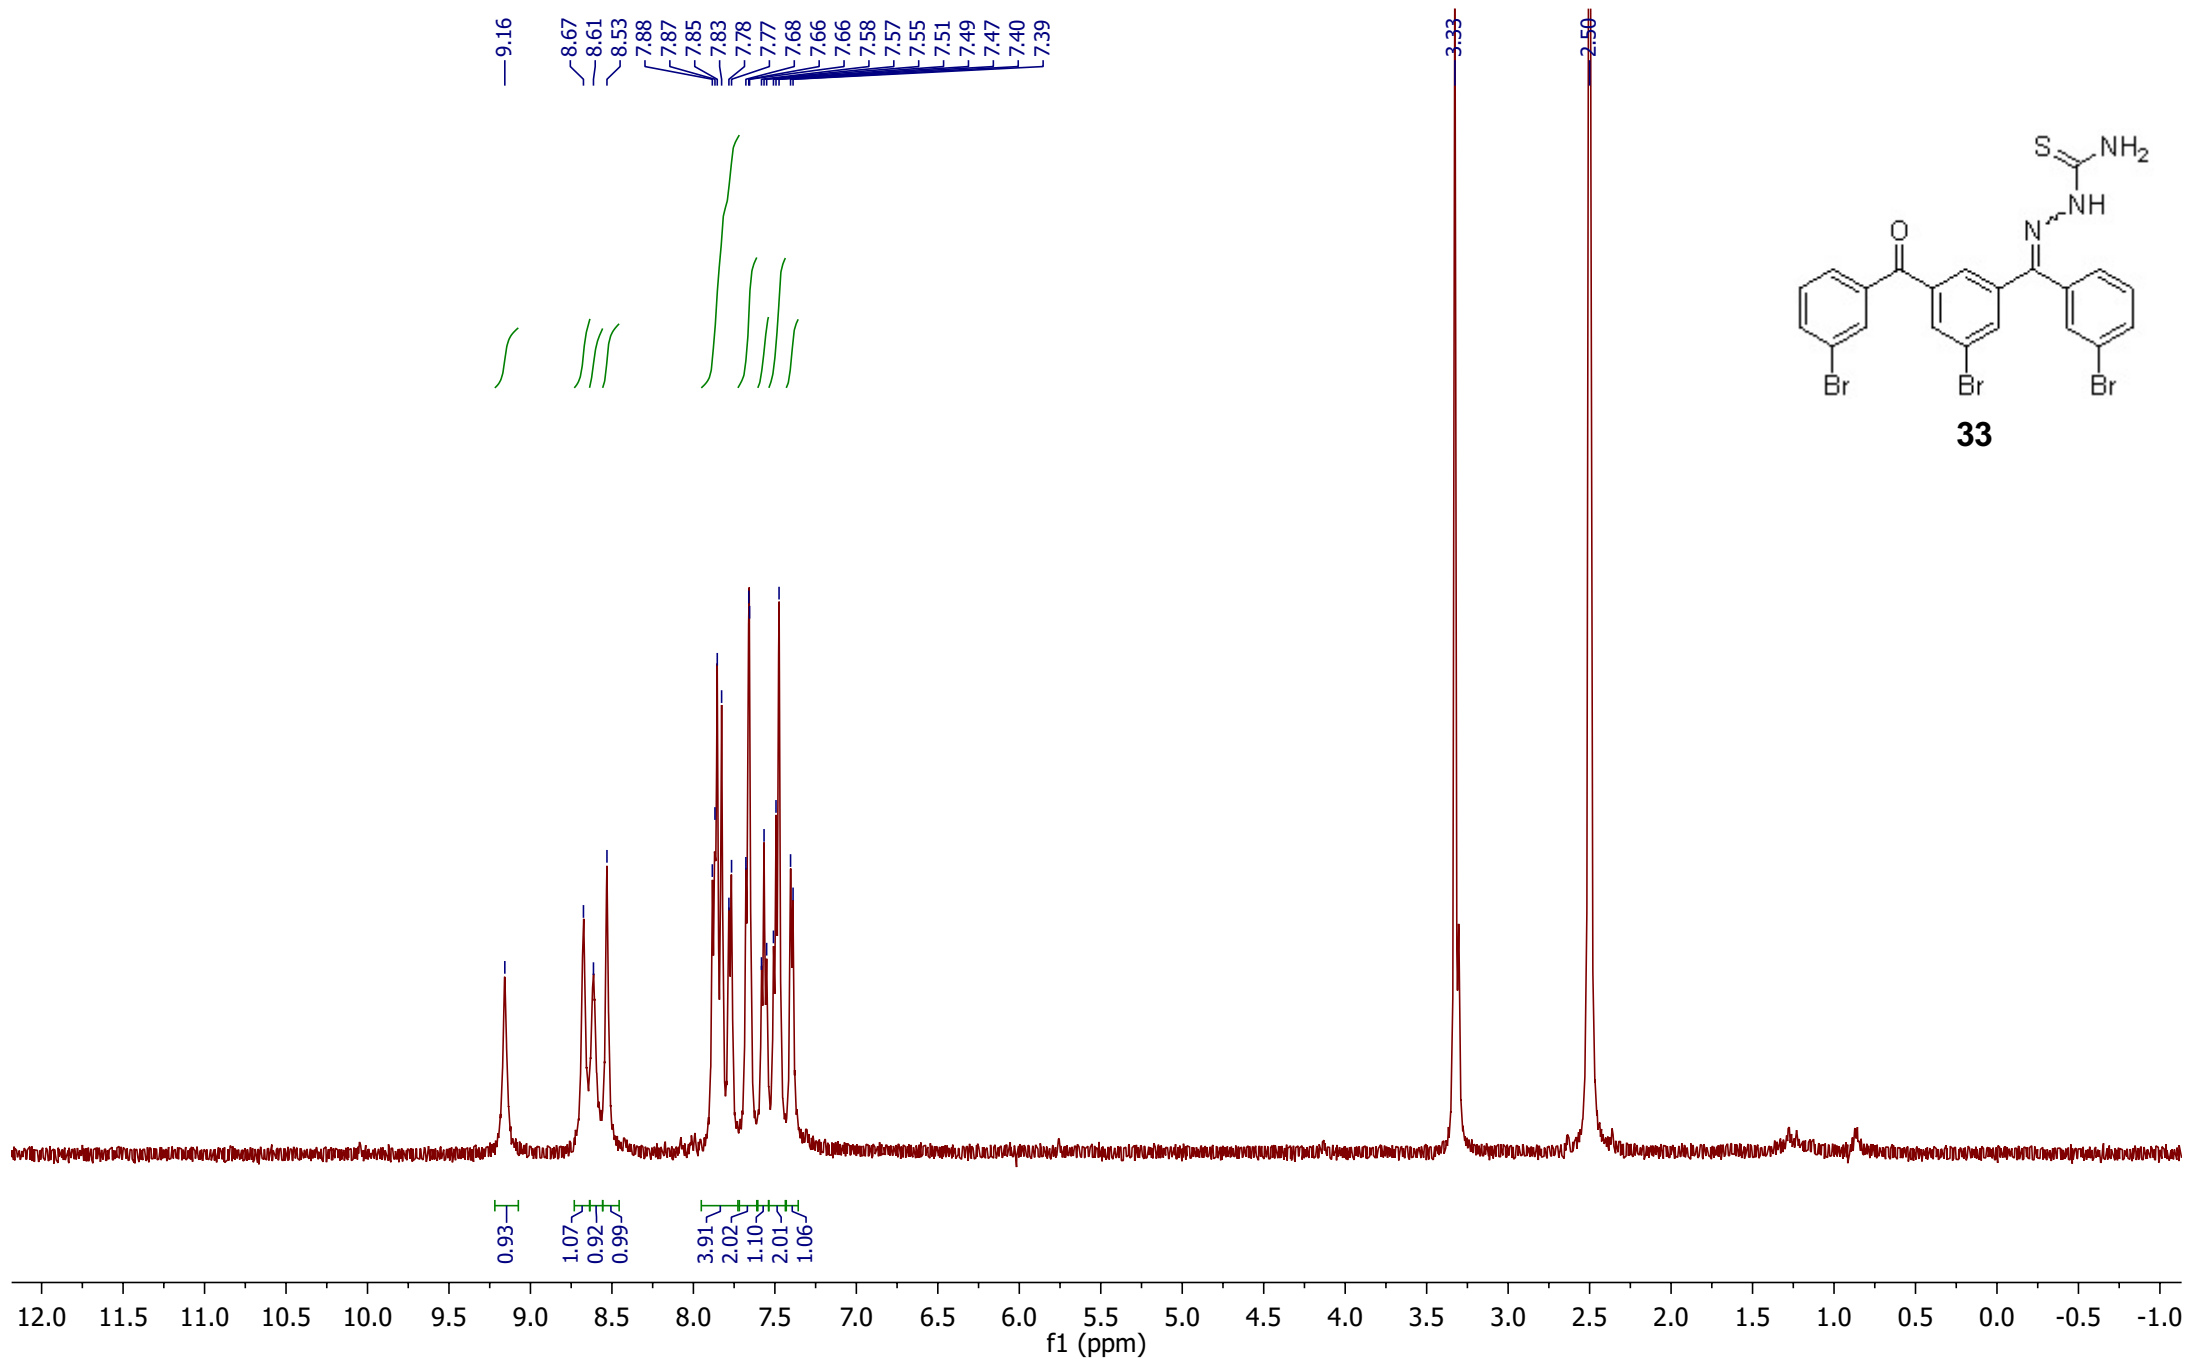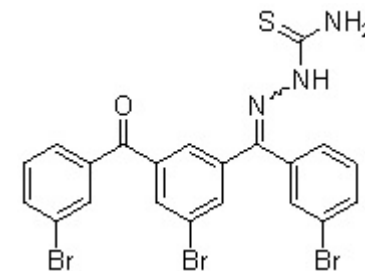

**33**

<sup>1</sup>H NMR (500 MHz, DMSO-d<sub>6</sub>) at 24 h for Compound **33**

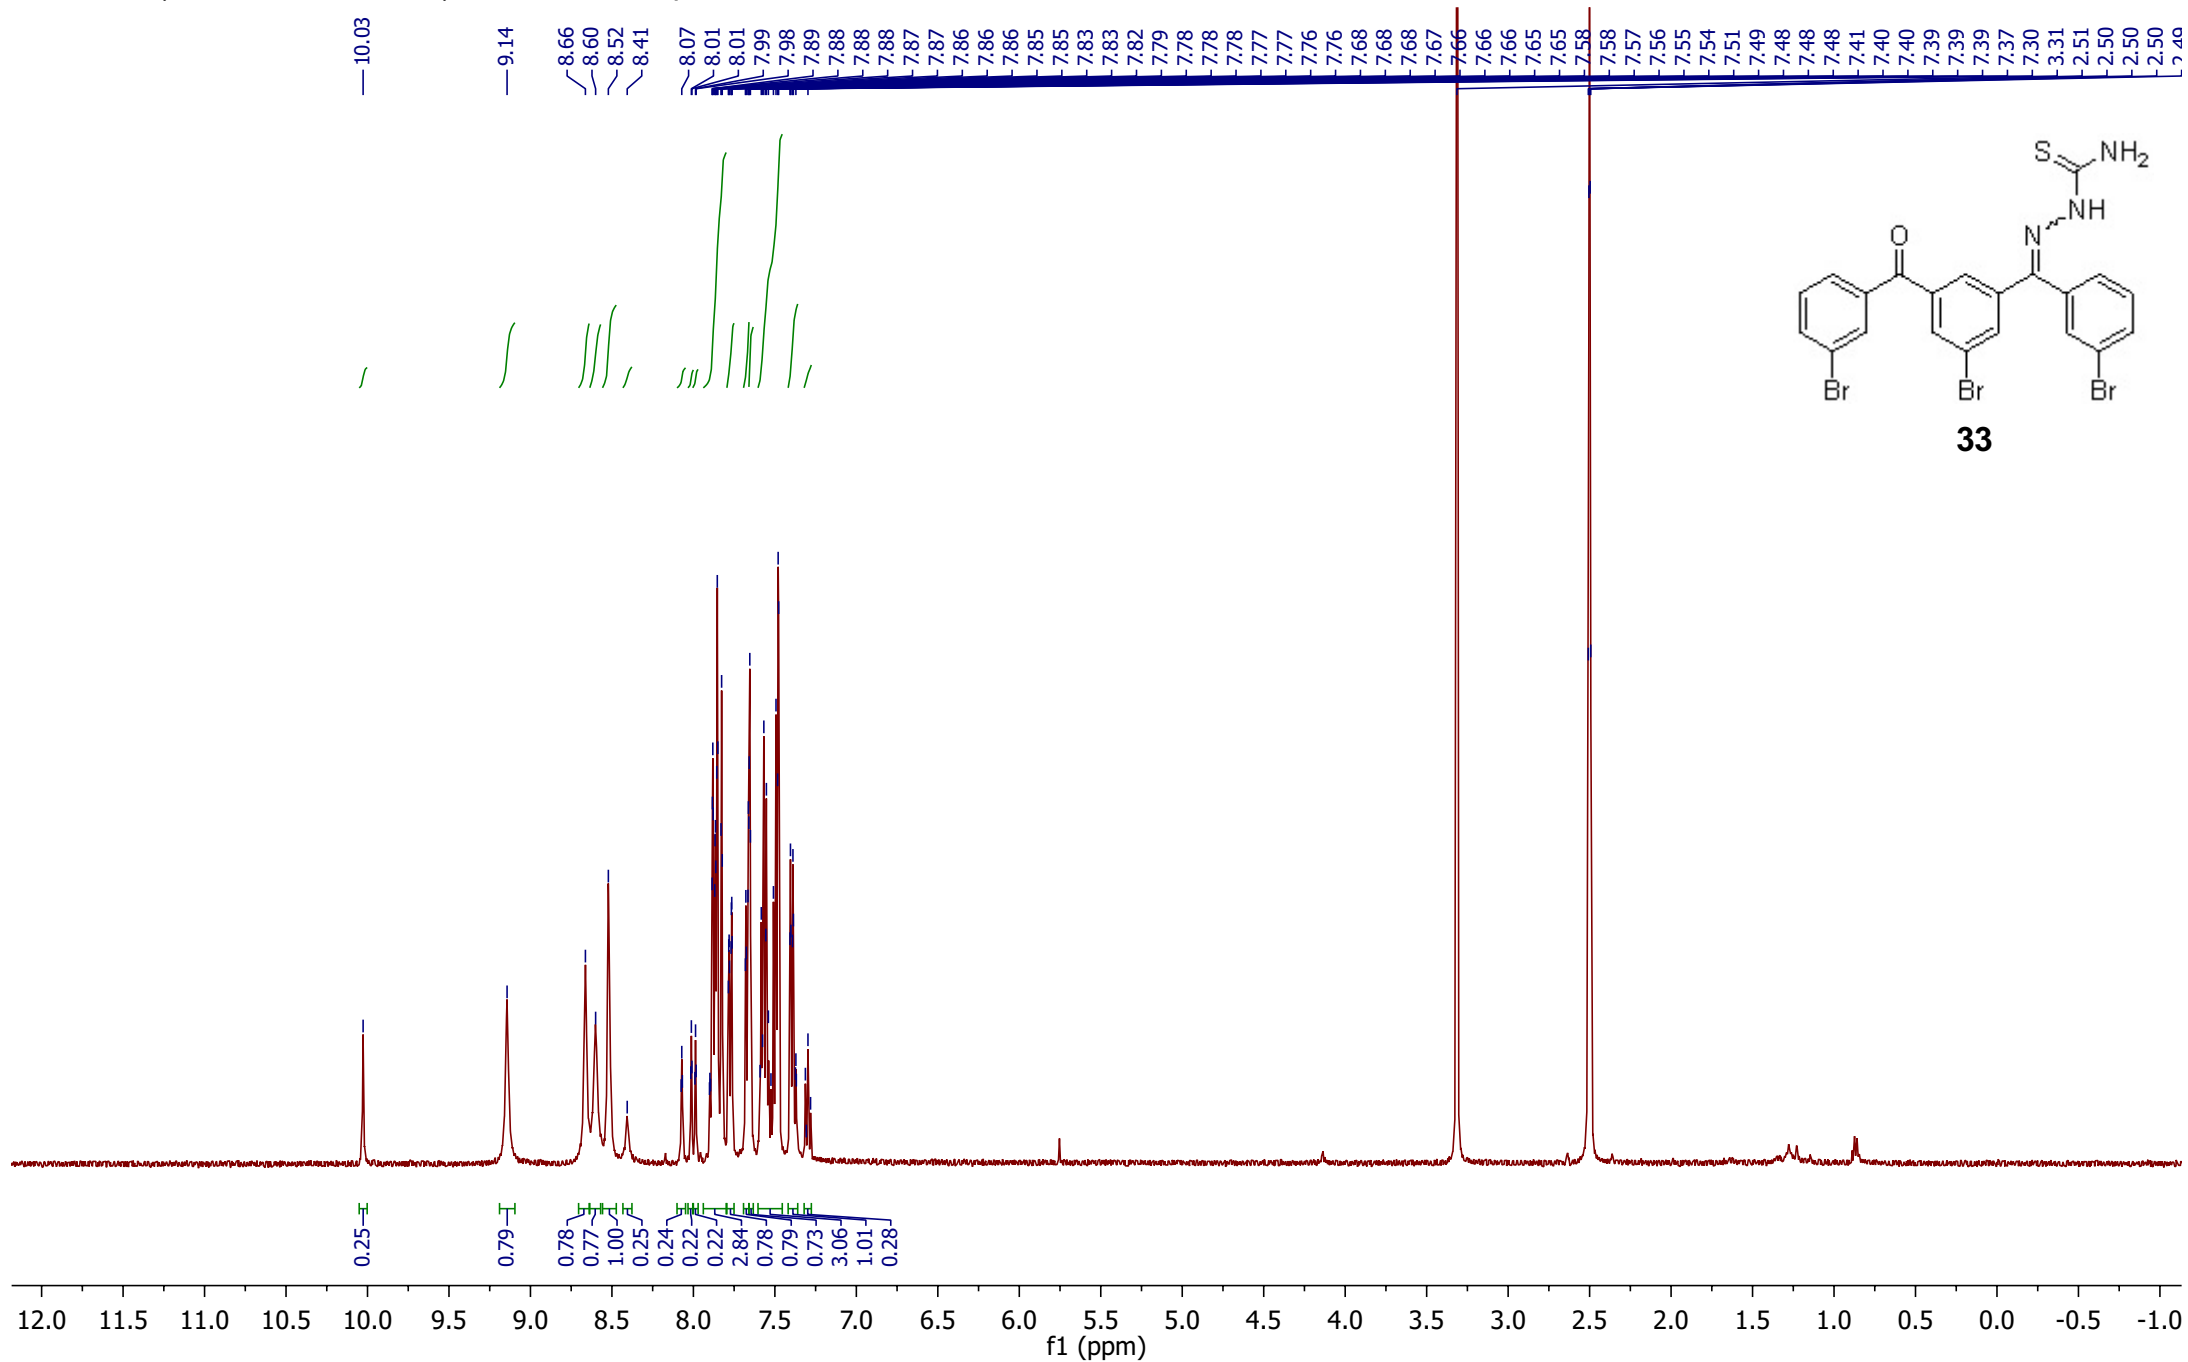

<sup>1</sup>H NMR (500 MHz, DMSO-d<sub>6</sub>) at 16 days for Compound **33**

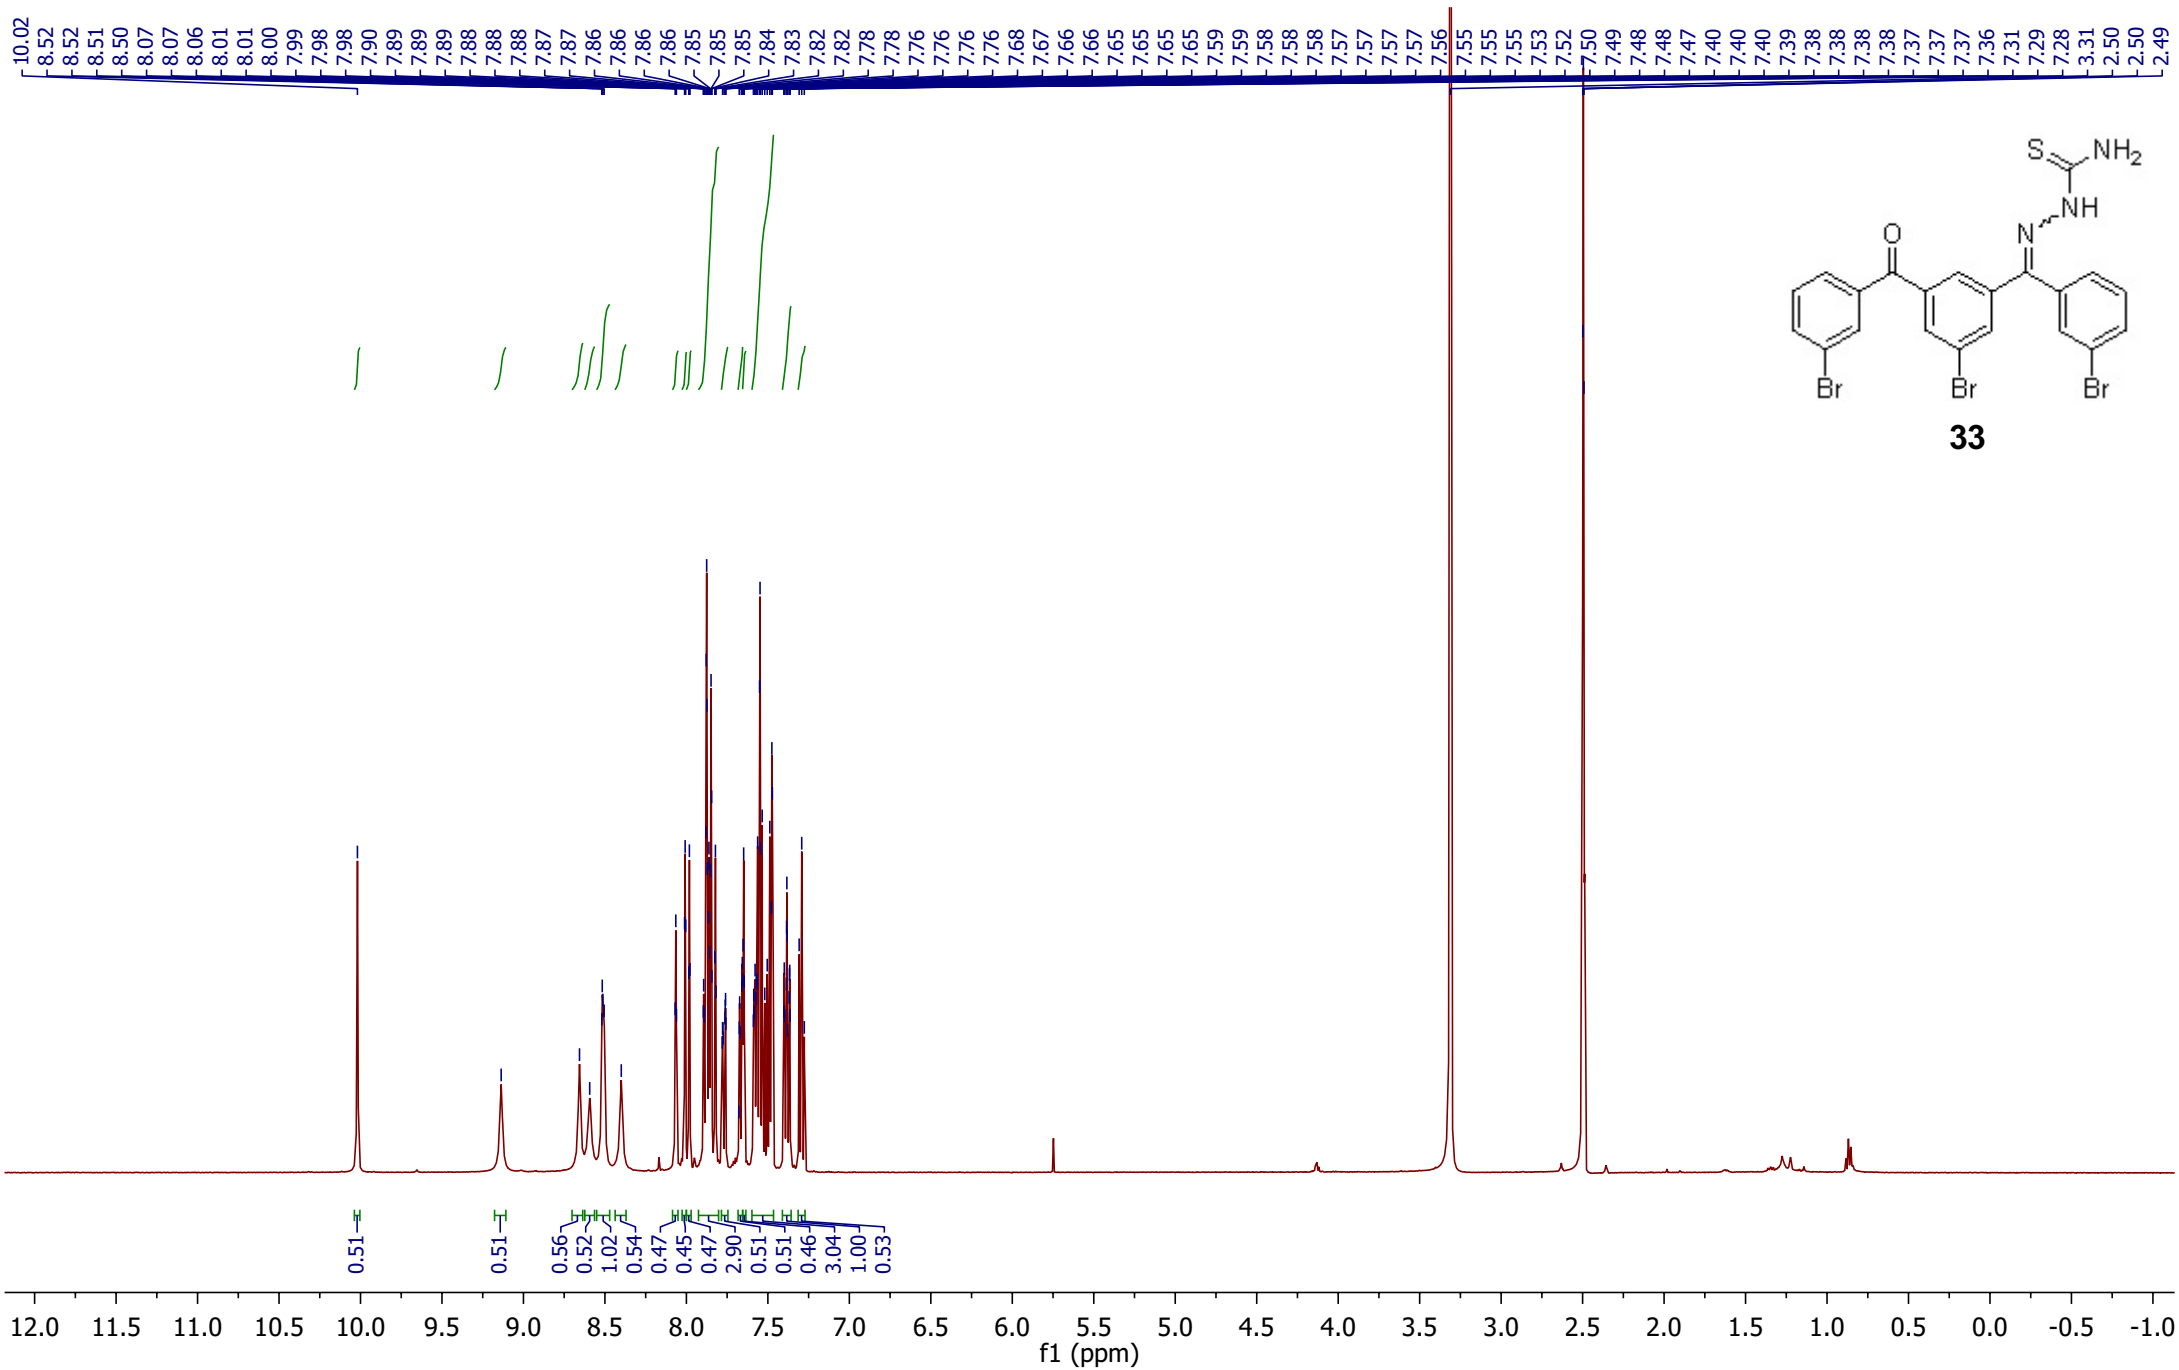

$^{13}\text{C}$  NMR (125 MHz, DMSO- $d_6$ ) for Compound **33**

192.38

178.49

144.58

138.87

138.30

138.14

135.71

133.08

132.97

132.58

131.83

131.23

130.71

128.82

127.85

127.74

122.96

122.42

121.94

40.02

39.85

39.69

39.52

39.35

39.19

39.02



**33**

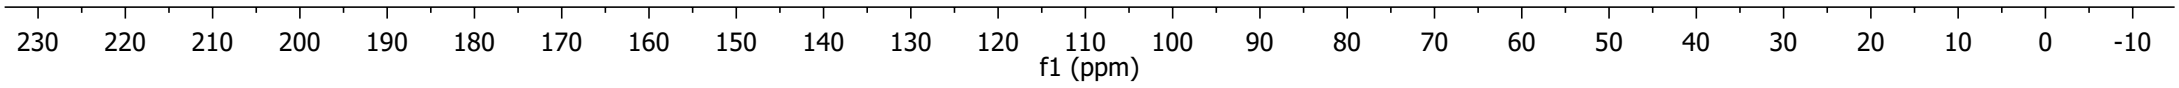

### HPLC trace for Compound 33

=====  
Acq. Operator : ERICAP  
Acq. Instrument : Instrument 1 Location : -  
Injection Date : 4/29/2014 9:53:23 PM  
Acq. Method : C:\CHEM32\1\METHODS\GRAD 2 50-90 ACN.M  
Last changed : 4/29/2014 9:52:15 PM by ERICAP  
(modified after loading)  
Analysis Method : C:\CHEM32\1\DATA\ERICAP\ENPV54A000036.D\DA.M (GRAD 2 50-90 ACN.M)  
Last changed : 6/12/2014 9:45:00 PM by ERICAP  
(modified after loading)  
Sample Info : ENP-V-54A

Method:

0-25 Min. 50  
:70 to 90:10 ACN:Water  
25-30 min 90:10 ACN:Water

Isolated as a single geometrical isomer. Isomerizes to a mixture of E/Z geometrical isomers in solution.

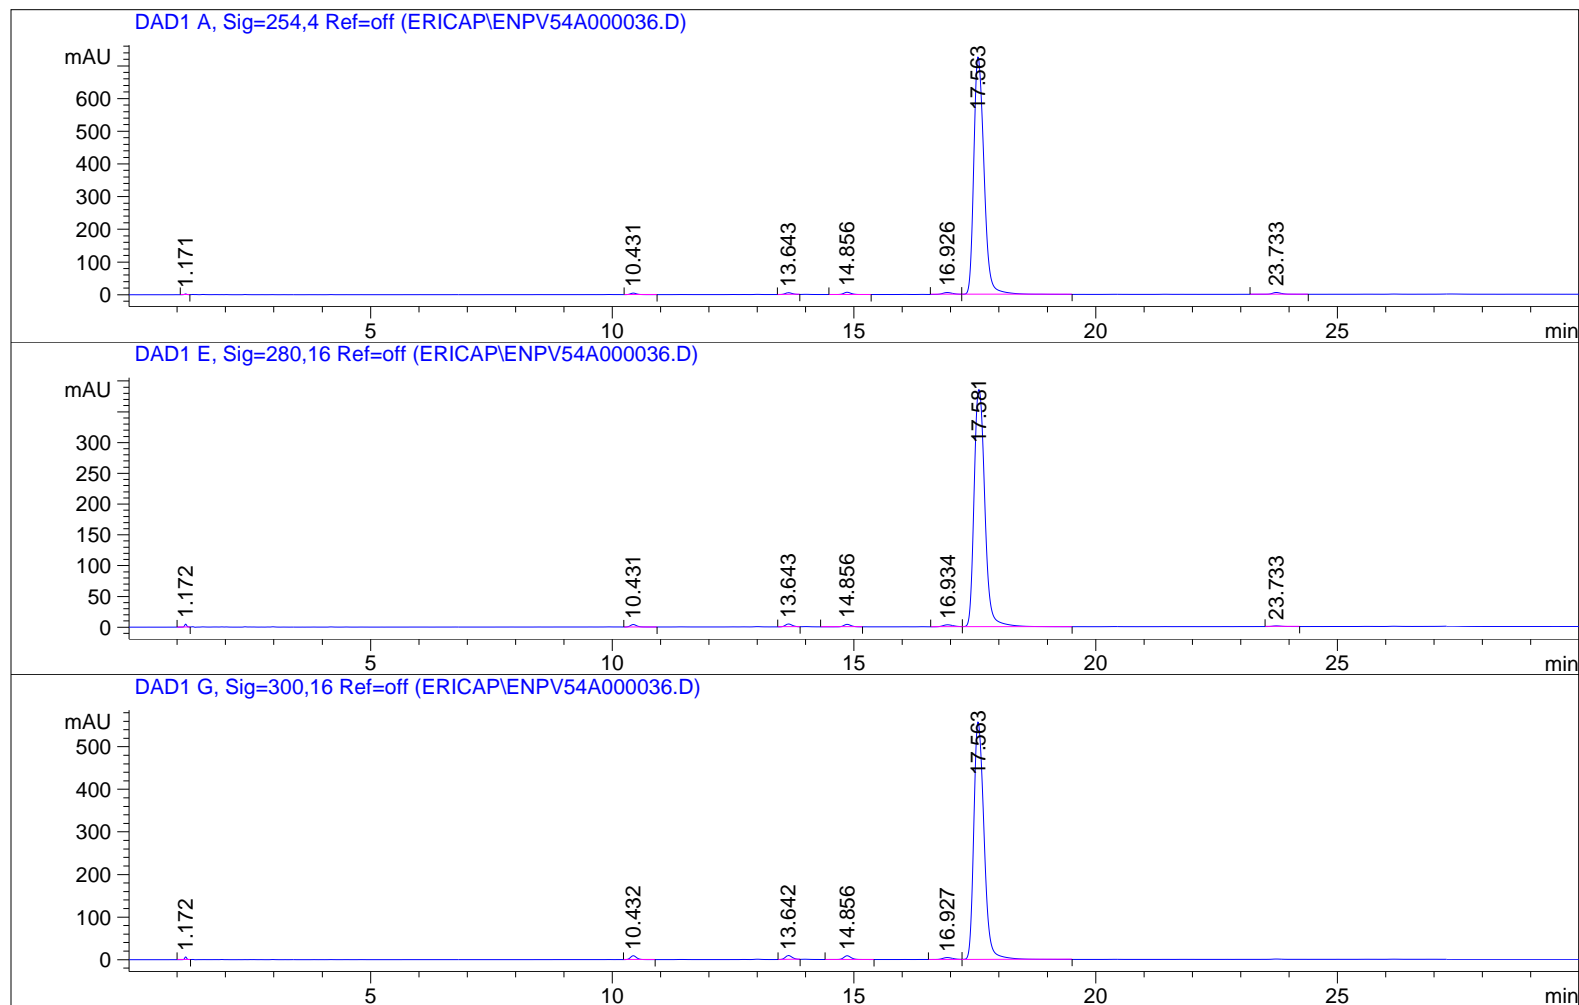

HPLC trace for Compound 33

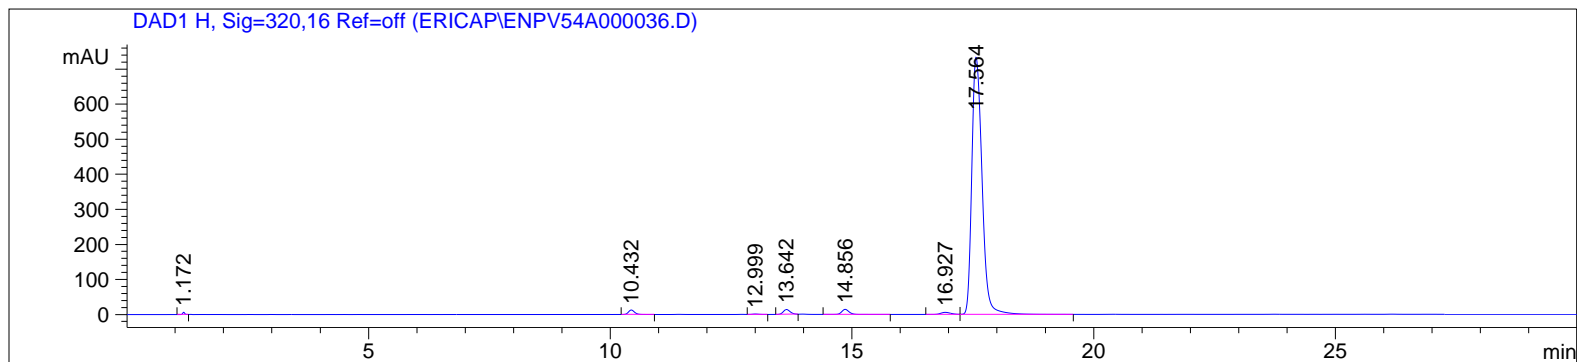

=====  
 Area Percent Report  
 =====

Sorted By : Signal  
 Multiplier : 1.0000  
 Dilution : 1.0000  
 Use Multiplier & Dilution Factor with ISTDs

Signal 1: DAD1 A, Sig=254,4 Ref=off

| Peak # | RetTime [min] | Type | Width [min] | Area [mAU*s] | Height [mAU] | Area %  |
|--------|---------------|------|-------------|--------------|--------------|---------|
| 1      | 1.171         | BV   | 0.0510      | 7.87582      | 2.35338      | 0.0716  |
| 2      | 10.431        | BB   | 0.1342      | 40.63835     | 4.64135      | 0.3695  |
| 3      | 13.643        | BB   | 0.1532      | 53.48111     | 5.41818      | 0.4862  |
| 4      | 14.856        | BB   | 0.1593      | 71.34914     | 6.86153      | 0.6487  |
| 5      | 16.926        | BV   | 0.2292      | 87.81870     | 5.91430      | 0.7984  |
| 6      | 17.563        | VB   | 0.2314      | 1.06672e4    | 726.20331    | 96.9788 |
| 7      | 23.733        | BB   | 0.1959      | 71.15097     | 5.53792      | 0.6469  |

Totals : 1.09995e4 756.92998

Signal 2: DAD1 E, Sig=280,16 Ref=off

| Peak # | RetTime [min] | Type | Width [min] | Area [mAU*s] | Height [mAU] | Area %  |
|--------|---------------|------|-------------|--------------|--------------|---------|
| 1      | 1.172         | BV   | 0.0516      | 16.58449     | 4.89014      | 0.2704  |
| 2      | 10.431        | BB   | 0.1345      | 35.12454     | 3.99845      | 0.5728  |
| 3      | 13.643        | BB   | 0.1538      | 45.20145     | 4.55400      | 0.7371  |
| 4      | 14.856        | BB   | 0.1589      | 41.56075     | 4.00905      | 0.6777  |
| 5      | 16.934        | BV   | 0.2351      | 48.93949     | 3.22429      | 0.7980  |
| 6      | 17.581        | VB   | 0.2435      | 5931.77734   | 385.45874    | 96.7274 |
| 7      | 23.733        | BB   | 0.1895      | 13.28068     | 1.06473      | 0.2166  |

Totals : 6132.46873 407.19940

### HPLC trace for Compound 33

Signal 3: DAD1 G, Sig=300,16 Ref=off

| Peak # | RetTime [min] | Type | Width [min] | Area [mAU*s] | Height [mAU] | Area %  |
|--------|---------------|------|-------------|--------------|--------------|---------|
| 1      | 1.172         | BV   | 0.0496      | 20.75646     | 6.43937      | 0.2428  |
| 2      | 10.432        | BB   | 0.1335      | 78.86343     | 9.06844      | 0.9226  |
| 3      | 13.642        | BB   | 0.1534      | 90.39398     | 9.14135      | 1.0575  |
| 4      | 14.856        | BB   | 0.1594      | 91.44717     | 8.78706      | 1.0698  |
| 5      | 16.927        | BV   | 0.2261      | 66.01421     | 4.52863      | 0.7723  |
| 6      | 17.563        | VB   | 0.2335      | 8200.51074   | 557.71246    | 95.9350 |

Totals : 8547.98599 595.67731

Signal 4: DAD1 H, Sig=320,16 Ref=off

| Peak # | RetTime [min] | Type | Width [min] | Area [mAU*s] | Height [mAU] | Area %  |
|--------|---------------|------|-------------|--------------|--------------|---------|
| 1      | 1.172         | BV   | 0.0488      | 20.34552     | 6.45876      | 0.1800  |
| 2      | 10.432        | BB   | 0.1333      | 111.17649    | 12.80841     | 0.9837  |
| 3      | 12.999        | BB   | 0.1413      | 10.32658     | 1.14361      | 0.0914  |
| 4      | 13.642        | BB   | 0.1529      | 135.37752    | 13.75121     | 1.1979  |
| 5      | 14.856        | BB   | 0.1593      | 149.97922    | 14.42933     | 1.3271  |
| 6      | 16.927        | BV   | 0.2257      | 85.89504     | 5.90670      | 0.7600  |
| 7      | 17.564        | VB   | 0.2336      | 1.07885e4    | 733.43652    | 95.4599 |

Totals : 1.13016e4 787.93455

=====  
\*\*\* End of Report \*\*\*

# HRMS (ESI) for Compound 33

ENP\_V\_54A\_Orbi\_+ESI\_ (ACN, lock = 391

5/8/2014 12:09:40 AM

ENP\_V\_54A\_Orbi\_+ESI\_ (ACN, lock = 391 #1-11 RT: 0.01-0.09 AV: 11 NL: 1.72E7  
T: FTMS + p ESI Full ms [150.00-2000.00]

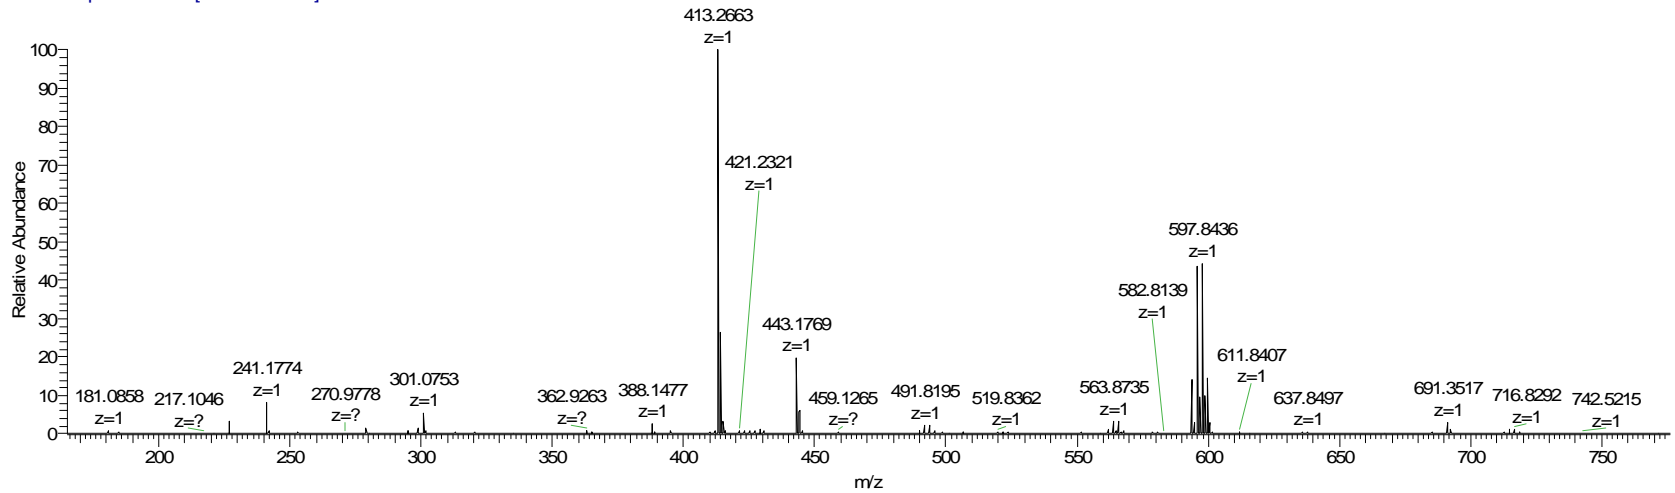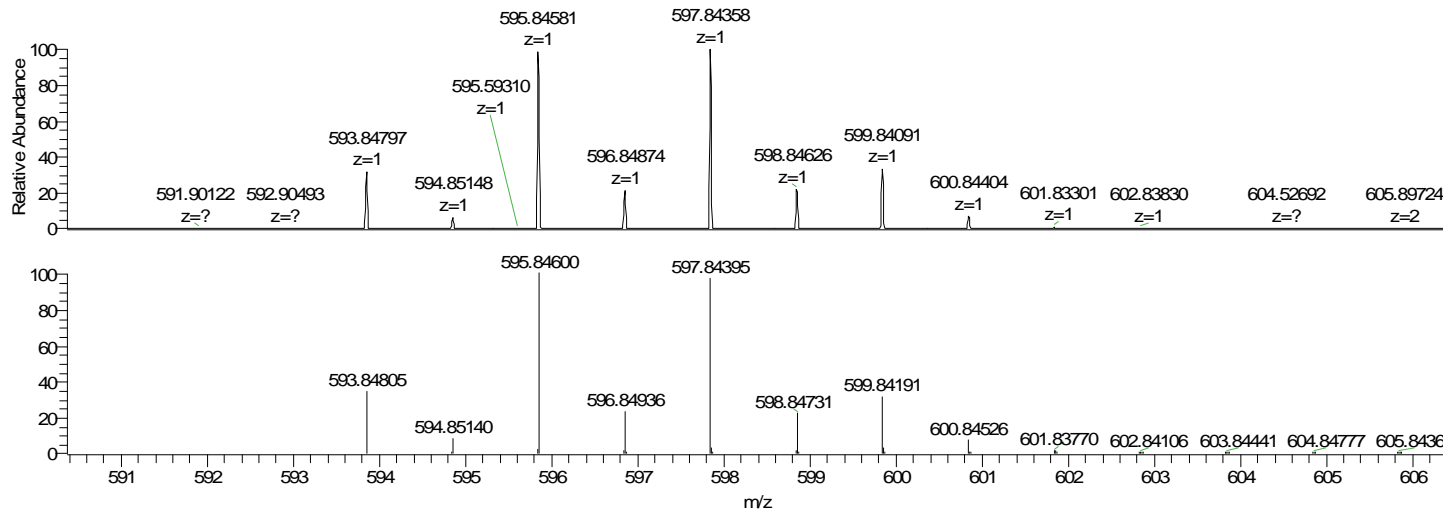

NL:  
7.59E6  
ENP\_V\_54A\_Orbi\_+ESI\_  
(ACN, lock = 391#1-11 RT:  
0.01-0.09 AV: 11 T: FTMS +  
p ESI Full ms  
[150.00-2000.00]

NL:  
2.84E5  
C<sub>21</sub>H<sub>4</sub>Br<sub>3</sub>N<sub>3</sub>OS+H  
C<sub>21</sub>H<sub>5</sub>Br<sub>3</sub>N<sub>3</sub>O<sub>1</sub>S<sub>1</sub>  
pa Chrg 1



X-Ray crystallographic data obtained for 1,3,5-trisbenzoylbenzene thiosemicarbazone (Compound **2**) has been deposited in the Cambridge Crystallographic Data Centre and was assigned the deposition number CDCC 1042567.

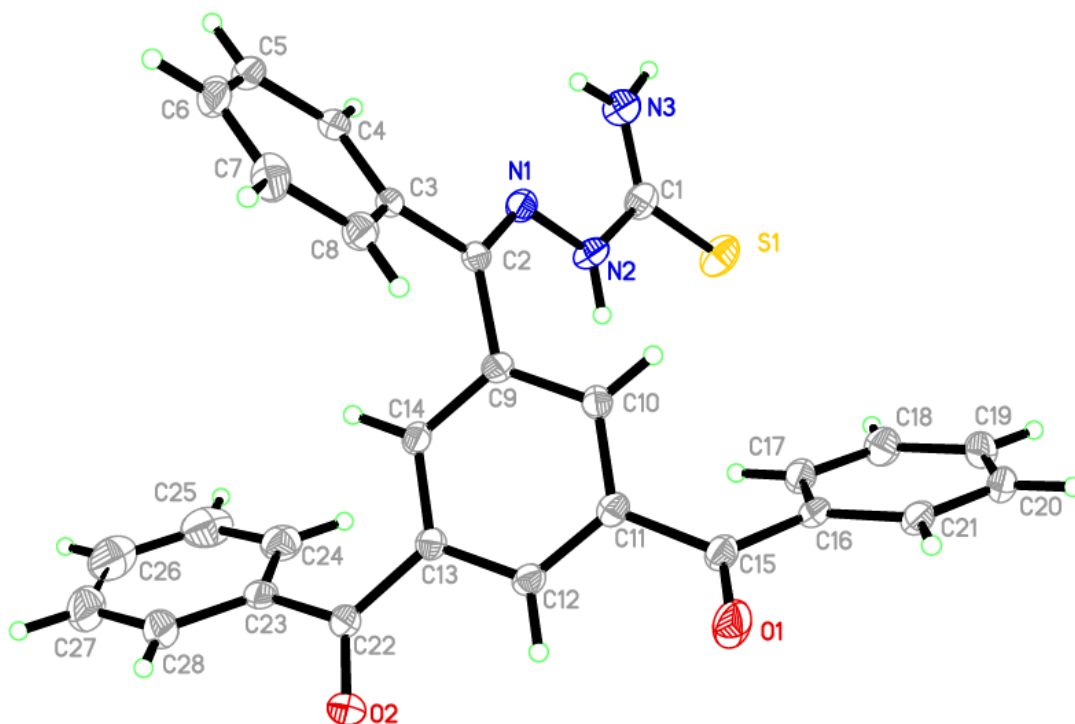

**Figure S7.** X-Ray Crystal Structure of Compound **2**

**Table S2.** Crystal data and structure refinement for Compound **2**.

|                                 |                                                                 |                  |
|---------------------------------|-----------------------------------------------------------------|------------------|
| Identification code             | kp65                                                            |                  |
| Empirical formula               | C <sub>28</sub> H <sub>21</sub> N <sub>3</sub> O <sub>2</sub> S |                  |
| Formula weight                  | 463.54                                                          |                  |
| Temperature                     | 296(2) K                                                        |                  |
| Wavelength                      | 0.71073 Å                                                       |                  |
| Crystal system                  | Monoclinic                                                      |                  |
| Space group                     | P2(1)/n                                                         |                  |
| Unit cell dimensions            | a = 11.354(2) Å                                                 | α = 90°.         |
|                                 | b = 10.1178(17) Å                                               | β = 100.994(5)°. |
|                                 | c = 20.493(4) Å                                                 | γ = 90°.         |
| Volume                          | 2311.1(7) Å <sup>3</sup>                                        |                  |
| Z                               | 4                                                               |                  |
| Density (calculated)            | 1.332 Mg/m <sup>3</sup>                                         |                  |
| Absorption coefficient          | 0.172 mm <sup>-1</sup>                                          |                  |
| F(000)                          | 968                                                             |                  |
| Crystal size                    | 0.27 x 0.27 x 0.07 mm <sup>3</sup>                              |                  |
| Theta range for data collection | 1.91 to 27.94°.                                                 |                  |

|                                   |                                             |
|-----------------------------------|---------------------------------------------|
| Index ranges                      | -14<=h<=14, -10<=k<=13, -26<=l<=27          |
| Reflections collected             | 30934                                       |
| Independent reflections           | 5493 [R(int) = 0.0644]                      |
| Completeness to theta = 27.94°    | 99.1 %                                      |
| Absorption correction             | Semi-empirical from equivalents             |
| Max. and min. transmission        | 0.9881 and 0.9553                           |
| Refinement method                 | Full-matrix least-squares on F <sup>2</sup> |
| Data / restraints / parameters    | 5493 / 0 / 319                              |
| Goodness-of-fit on F <sup>2</sup> | 1.054                                       |
| Final R indices [I>2sigma(I)]     | R1 = 0.0450, wR2 = 0.1052                   |
| R indices (all data)              | R1 = 0.0634, wR2 = 0.1182                   |
| Largest diff. peak and hole       | 0.448 and -0.386 e.Å <sup>-3</sup>          |

**Table S3.** Atomic coordinates ( x 10<sup>4</sup>) and equivalent isotropic displacement parameters (Å<sup>2</sup>x 10<sup>3</sup>) for Compound **2**. U(eq) is defined as one third of the trace of the orthogonalized U<sup>ij</sup> tensor.

|       | x       | y        | z       | U(eq) |
|-------|---------|----------|---------|-------|
| S(1)  | 1905(1) | 4504(1)  | 2459(1) | 30(1) |
| O(1)  | 2110(1) | 10212(1) | 4828(1) | 33(1) |
| O(2)  | 5832(1) | 11865(1) | 4047(1) | 28(1) |
| N(1)  | 4820(1) | 4973(1)  | 3795(1) | 19(1) |
| N(2)  | 3782(1) | 5227(2)  | 3348(1) | 22(1) |
| N(3)  | 3649(2) | 3015(2)  | 3146(1) | 25(1) |
| C(1)  | 3176(2) | 4208(2)  | 3008(1) | 22(1) |
| C(2)  | 5324(1) | 5931(2)  | 4158(1) | 16(1) |
| C(3)  | 6485(1) | 5645(2)  | 4601(1) | 18(1) |
| C(4)  | 7241(2) | 4665(2)  | 4436(1) | 22(1) |
| C(5)  | 8337(2) | 4426(2)  | 4848(1) | 28(1) |
| C(6)  | 8684(2) | 5140(2)  | 5429(1) | 30(1) |
| C(7)  | 7937(2) | 6104(2)  | 5598(1) | 29(1) |
| C(8)  | 6841(2) | 6362(2)  | 5184(1) | 22(1) |
| C(9)  | 4860(1) | 7309(2)  | 4143(1) | 17(1) |
| C(10) | 3734(1) | 7602(2)  | 4284(1) | 18(1) |
| C(11) | 3367(1) | 8917(2)  | 4298(1) | 18(1) |
| C(12) | 4120(1) | 9924(2)  | 4174(1) | 18(1) |

|       |         |          |         |       |
|-------|---------|----------|---------|-------|
| C(13) | 5220(1) | 9637(2)  | 4001(1) | 17(1) |
| C(14) | 5590(1) | 8329(2)  | 3997(1) | 17(1) |
| C(15) | 2177(2) | 9276(2)  | 4463(1) | 21(1) |
| C(16) | 1097(1) | 8490(2)  | 4168(1) | 19(1) |
| C(17) | 1022(2) | 7838(2)  | 3562(1) | 21(1) |
| C(18) | -14(2)  | 7161(2)  | 3286(1) | 26(1) |
| C(19) | -974(2) | 7124(2)  | 3615(1) | 26(1) |
| C(20) | -901(2) | 7765(2)  | 4218(1) | 24(1) |
| C(21) | 126(2)  | 8456(2)  | 4493(1) | 21(1) |
| C(22) | 5988(1) | 10750(2) | 3847(1) | 21(1) |
| C(23) | 6925(2) | 10506(2) | 3443(1) | 23(1) |
| C(24) | 6725(2) | 9662(2)  | 2895(1) | 29(1) |
| C(25) | 7605(2) | 9521(2)  | 2514(1) | 41(1) |
| C(26) | 8677(2) | 10194(2) | 2680(1) | 48(1) |
| C(27) | 8878(2) | 11028(2) | 3222(1) | 46(1) |
| C(28) | 8001(2) | 11195(2) | 3600(1) | 33(1) |

---

**Table S4.** Bond lengths [ $\text{\AA}$ ] and angles [ $^\circ$ ] for Compound **2**.

|            |            |
|------------|------------|
| S(1)-C(1)  | 1.6795(18) |
| O(1)-C(15) | 1.219(2)   |
| O(2)-C(22) | 1.225(2)   |
| N(1)-C(2)  | 1.287(2)   |
| N(1)-N(2)  | 1.372(2)   |
| N(2)-C(1)  | 1.356(2)   |
| N(3)-C(1)  | 1.329(2)   |
| C(2)-C(3)  | 1.480(2)   |
| C(2)-C(9)  | 1.488(2)   |
| C(3)-C(8)  | 1.390(2)   |
| C(3)-C(4)  | 1.396(2)   |
| C(4)-C(5)  | 1.386(2)   |
| C(5)-C(6)  | 1.386(3)   |
| C(6)-C(7)  | 1.379(3)   |
| C(7)-C(8)  | 1.391(2)   |
| C(9)-C(14) | 1.391(2)   |

|                |            |
|----------------|------------|
| C(9)-C(10)     | 1.396(2)   |
| C(10)-C(11)    | 1.397(2)   |
| C(11)-C(12)    | 1.385(2)   |
| C(11)-C(15)    | 1.498(2)   |
| C(12)-C(13)    | 1.393(2)   |
| C(13)-C(14)    | 1.390(2)   |
| C(13)-C(22)    | 1.495(2)   |
| C(15)-C(16)    | 1.490(2)   |
| C(16)-C(21)    | 1.392(2)   |
| C(16)-C(17)    | 1.394(2)   |
| C(17)-C(18)    | 1.385(2)   |
| C(18)-C(19)    | 1.386(2)   |
| C(19)-C(20)    | 1.383(3)   |
| C(20)-C(21)    | 1.385(2)   |
| C(22)-C(23)    | 1.488(2)   |
| C(23)-C(28)    | 1.391(3)   |
| C(23)-C(24)    | 1.393(3)   |
| C(24)-C(25)    | 1.388(3)   |
| C(25)-C(26)    | 1.380(4)   |
| C(26)-C(27)    | 1.378(4)   |
| C(27)-C(28)    | 1.384(3)   |
|                |            |
| C(2)-N(1)-N(2) | 118.39(14) |
| C(1)-N(2)-N(1) | 119.20(15) |
| N(3)-C(1)-N(2) | 115.90(16) |
| N(3)-C(1)-S(1) | 124.37(14) |
| N(2)-C(1)-S(1) | 119.73(14) |
| N(1)-C(2)-C(3) | 116.94(14) |
| N(1)-C(2)-C(9) | 125.22(15) |
| C(3)-C(2)-C(9) | 117.77(14) |
| C(8)-C(3)-C(4) | 119.22(15) |
| C(8)-C(3)-C(2) | 120.29(15) |
| C(4)-C(3)-C(2) | 120.48(15) |
| C(5)-C(4)-C(3) | 119.91(17) |
| C(4)-C(5)-C(6) | 120.54(17) |
| C(7)-C(6)-C(5) | 119.82(17) |

|                   |            |
|-------------------|------------|
| C(6)-C(7)-C(8)    | 120.08(18) |
| C(3)-C(8)-C(7)    | 120.43(17) |
| C(14)-C(9)-C(10)  | 119.62(15) |
| C(14)-C(9)-C(2)   | 118.46(14) |
| C(10)-C(9)-C(2)   | 121.91(14) |
| C(9)-C(10)-C(11)  | 119.70(15) |
| C(12)-C(11)-C(10) | 120.03(15) |
| C(12)-C(11)-C(15) | 118.52(15) |
| C(10)-C(11)-C(15) | 121.43(15) |
| C(11)-C(12)-C(13) | 120.53(15) |
| C(14)-C(13)-C(12) | 119.21(15) |
| C(14)-C(13)-C(22) | 121.79(15) |
| C(12)-C(13)-C(22) | 118.97(15) |
| C(13)-C(14)-C(9)  | 120.76(15) |
| O(1)-C(15)-C(16)  | 121.38(15) |
| O(1)-C(15)-C(11)  | 119.43(15) |
| C(16)-C(15)-C(11) | 119.18(14) |
| C(21)-C(16)-C(17) | 119.59(15) |
| C(21)-C(16)-C(15) | 119.05(15) |
| C(17)-C(16)-C(15) | 121.30(14) |
| C(18)-C(17)-C(16) | 120.05(15) |
| C(17)-C(18)-C(19) | 119.99(17) |
| C(20)-C(19)-C(18) | 120.16(17) |
| C(19)-C(20)-C(21) | 120.16(16) |
| C(20)-C(21)-C(16) | 120.04(16) |
| O(2)-C(22)-C(23)  | 120.28(15) |
| O(2)-C(22)-C(13)  | 119.69(15) |
| C(23)-C(22)-C(13) | 120.01(15) |
| C(28)-C(23)-C(24) | 119.63(17) |
| C(28)-C(23)-C(22) | 118.52(17) |
| C(24)-C(23)-C(22) | 121.77(16) |
| C(25)-C(24)-C(23) | 119.6(2)   |
| C(26)-C(25)-C(24) | 120.4(2)   |
| C(27)-C(26)-C(25) | 120.3(2)   |
| C(26)-C(27)-C(28) | 120.0(2)   |
| C(27)-C(28)-C(23) | 120.2(2)   |

---

Symmetry transformations used to generate equivalent atoms:

**Table S5.** Anisotropic displacement parameters ( $\text{\AA}^2 \times 10^3$ ) for Compound **2**. The anisotropic displacement factor exponent takes the form:  $-2\pi^2 [ h^2 a^{*2} U^{11} + \dots + 2 h k a^* b^* U^{12} ]$

---

|       | U <sup>11</sup> | U <sup>22</sup> | U <sup>33</sup> | U <sup>23</sup> | U <sup>13</sup> | U <sup>12</sup> |
|-------|-----------------|-----------------|-----------------|-----------------|-----------------|-----------------|
| S(1)  | 25(1)           | 37(1)           | 25(1)           | -6(1)           | -4(1)           | 7(1)            |
| O(1)  | 24(1)           | 32(1)           | 46(1)           | -18(1)          | 13(1)           | -1(1)           |
| O(2)  | 25(1)           | 16(1)           | 44(1)           | -2(1)           | 6(1)            | -1(1)           |
| N(1)  | 17(1)           | 21(1)           | 20(1)           | 2(1)            | 4(1)            | 2(1)            |
| N(2)  | 21(1)           | 21(1)           | 23(1)           | 0(1)            | 0(1)            | 6(1)            |
| N(3)  | 26(1)           | 24(1)           | 24(1)           | -5(1)           | 0(1)            | 1(1)            |
| C(1)  | 22(1)           | 27(1)           | 18(1)           | -3(1)           | 6(1)            | 3(1)            |
| C(2)  | 16(1)           | 16(1)           | 19(1)           | 3(1)            | 7(1)            | 1(1)            |
| C(3)  | 14(1)           | 16(1)           | 23(1)           | 6(1)            | 6(1)            | 0(1)            |
| C(4)  | 19(1)           | 17(1)           | 32(1)           | 5(1)            | 8(1)            | 1(1)            |
| C(5)  | 19(1)           | 24(1)           | 44(1)           | 12(1)           | 11(1)           | 5(1)            |
| C(6)  | 17(1)           | 36(1)           | 36(1)           | 18(1)           | 2(1)            | 1(1)            |
| C(7)  | 24(1)           | 39(1)           | 23(1)           | 7(1)            | 1(1)            | -5(1)           |
| C(8)  | 21(1)           | 24(1)           | 22(1)           | 4(1)            | 7(1)            | 1(1)            |
| C(9)  | 17(1)           | 17(1)           | 16(1)           | 1(1)            | 2(1)            | 2(1)            |
| C(10) | 16(1)           | 19(1)           | 18(1)           | 1(1)            | 4(1)            | -1(1)           |
| C(11) | 17(1)           | 20(1)           | 18(1)           | -2(1)           | 3(1)            | 2(1)            |
| C(12) | 17(1)           | 17(1)           | 20(1)           | -3(1)           | 1(1)            | 2(1)            |
| C(13) | 15(1)           | 18(1)           | 18(1)           | 0(1)            | 0(1)            | 0(1)            |
| C(14) | 14(1)           | 19(1)           | 18(1)           | 2(1)            | 3(1)            | 2(1)            |
| C(15) | 19(1)           | 22(1)           | 23(1)           | 0(1)            | 7(1)            | 4(1)            |
| C(16) | 16(1)           | 17(1)           | 24(1)           | 3(1)            | 4(1)            | 4(1)            |
| C(17) | 18(1)           | 23(1)           | 22(1)           | 2(1)            | 5(1)            | 2(1)            |
| C(18) | 23(1)           | 28(1)           | 25(1)           | -1(1)           | 3(1)            | 0(1)            |
| C(19) | 18(1)           | 25(1)           | 34(1)           | 4(1)            | 2(1)            | -1(1)           |
| C(20) | 17(1)           | 24(1)           | 32(1)           | 6(1)            | 9(1)            | 3(1)            |
| C(21) | 19(1)           | 21(1)           | 25(1)           | 3(1)            | 7(1)            | 6(1)            |
| C(22) | 16(1)           | 19(1)           | 26(1)           | 3(1)            | 0(1)            | 0(1)            |

---

|       |       |       |       |       |       |       |
|-------|-------|-------|-------|-------|-------|-------|
| C(23) | 21(1) | 18(1) | 31(1) | 11(1) | 7(1)  | 3(1)  |
| C(24) | 33(1) | 28(1) | 29(1) | 8(1)  | 9(1)  | 5(1)  |
| C(25) | 54(1) | 39(1) | 36(1) | 12(1) | 23(1) | 11(1) |
| C(26) | 44(1) | 48(1) | 60(2) | 24(1) | 34(1) | 15(1) |
| C(27) | 27(1) | 43(1) | 71(2) | 23(1) | 19(1) | 2(1)  |
| C(28) | 23(1) | 28(1) | 47(1) | 11(1) | 8(1)  | -1(1) |

---



X-Ray crystallographic data obtained for 1,3,5-trisbenzoylbenzene thiosemicarbazone (Compound **10**) has been deposited in the Cambridge Crystallographic Data Centre and was assigned the deposition number CDCC 1046061.

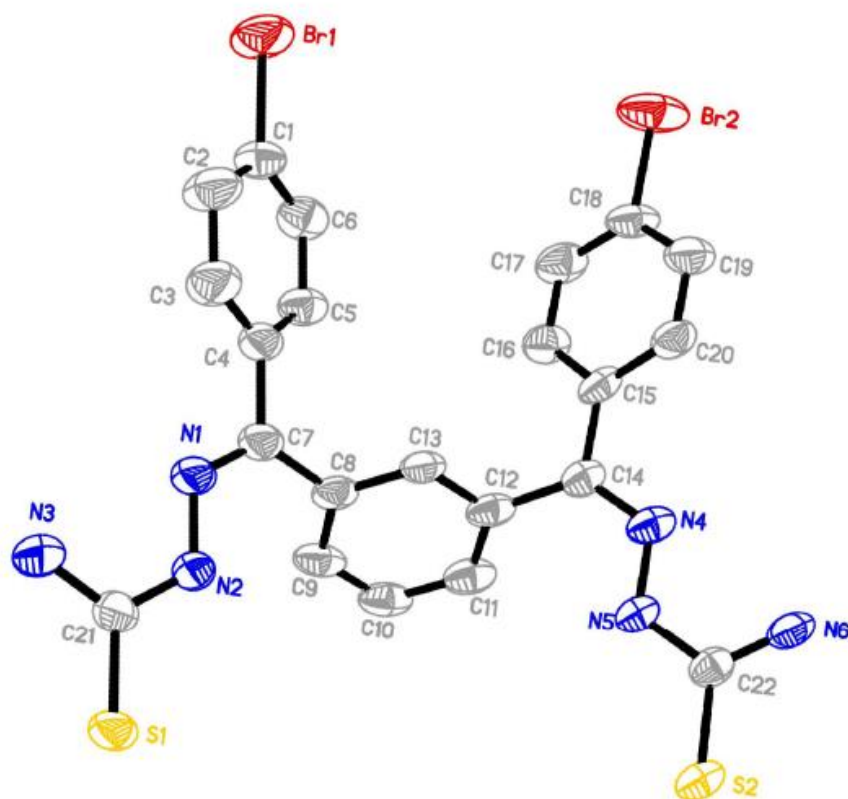

**Figure S8.** X-Ray Crystal Structure of Compound **10**

**Table S6.** Crystal data and structure refinement for Compound **10**.

|                        |                                                                               |                  |
|------------------------|-------------------------------------------------------------------------------|------------------|
| Identification code    | KK67                                                                          |                  |
| Empirical formula      | C <sub>22</sub> H <sub>18</sub> Br <sub>2</sub> N <sub>6</sub> S <sub>2</sub> |                  |
| Formula weight         | 590.36                                                                        |                  |
| Temperature            | 150(2) K                                                                      |                  |
| Wavelength             | 0.71073 Å                                                                     |                  |
| Crystal system         | Monoclinic                                                                    |                  |
| Space group            | C 2/c                                                                         |                  |
| Unit cell dimensions   | a = 29.008(3) Å                                                               | α = 90°.         |
|                        | b = 17.6911(16) Å                                                             | β = 110.569(3)°. |
|                        | c = 12.7098(11) Å                                                             | γ = 90°.         |
| Volume                 | 6106.7(10) Å <sup>3</sup>                                                     |                  |
| Z                      | 8                                                                             |                  |
| Density (calculated)   | 1.284 Mg/m <sup>3</sup>                                                       |                  |
| Absorption coefficient | 2.809 mm <sup>-1</sup>                                                        |                  |

|                                   |                                             |
|-----------------------------------|---------------------------------------------|
| F(000)                            | 2352                                        |
| Crystal size                      | 0.140 x 0.077 x 0.049 mm <sup>3</sup>       |
| Theta range for data collection   | 5.103 to 25.682°.                           |
| Index ranges                      | -35<=h<=35, -21<=k<=21, -15<=l<=14          |
| Reflections collected             | 29003                                       |
| Independent reflections           | 5751 [R(int) = 0.0438]                      |
| Completeness to theta = 25.242°   | 99.0 %                                      |
| Absorption correction             | Semi-empirical from equivalents             |
| Max. and min. transmission        | 0.732 and 0.581                             |
| Refinement method                 | Full-matrix least-squares on F <sup>2</sup> |
| Data / restraints / parameters    | 5751 / 0 / 289                              |
| Goodness-of-fit on F <sup>2</sup> | 1.029                                       |
| Final R indices [I>2sigma(I)]     | R1 = 0.1086, wR2 = 0.2988                   |
| R indices (all data)              | R1 = 0.1422, wR2 = 0.3245                   |
| Extinction coefficient            | n/a                                         |
| Largest diff. peak and hole       | 2.812 and -1.618 e.Å <sup>-3</sup>          |

**Table S7.** Atomic coordinates ( x 10<sup>4</sup>) and equivalent isotropic displacement parameters (Å<sup>2</sup>x 10<sup>3</sup>) for Compound **10**. U(eq) is defined as one third of the trace of the orthogonalized U<sup>ij</sup> tensor.

|       | x       | y        | z       | U(eq) |
|-------|---------|----------|---------|-------|
| Br(1) | 1675(1) | 4900(1)  | 1357(1) | 80(1) |
| Br(2) | 3621(1) | 6759(1)  | 1718(1) | 85(1) |
| S(1)  | -705(1) | 9682(1)  | 94(2)   | 53(1) |
| S(2)  | 1795(1) | 12076(1) | -103(2) | 45(1) |
| N(1)  | 299(3)  | 8101(4)  | 825(7)  | 53(2) |
| N(2)  | 76(3)   | 8806(4)  | 673(7)  | 53(2) |
| N(3)  | -646(4) | 8194(5)  | 311(12) | 92(4) |
| N(4)  | 2330(3) | 10044(4) | 650(6)  | 43(2) |
| N(5)  | 2022(3) | 10662(4) | 496(6)  | 40(2) |
| N(6)  | 2599(3) | 11311(4) | 11(6)   | 47(2) |
| C(1)  | 1392(4) | 5870(5)  | 1333(9) | 55(2) |
| C(2)  | 923(4)  | 6019(6)  | 598(11) | 68(3) |
| C(3)  | 726(4)  | 6733(6)  | 564(11) | 65(3) |
| C(4)  | 992(3)  | 7295(5)  | 1273(8) | 46(2) |

|       |         |          |         |       |
|-------|---------|----------|---------|-------|
| C(5)  | 1455(4) | 7125(5)  | 2023(8) | 48(2) |
| C(6)  | 1660(4) | 6413(5)  | 2064(8) | 52(2) |
| C(7)  | 772(4)  | 8062(5)  | 1226(8) | 47(2) |
| C(8)  | 1114(3) | 8708(5)  | 1638(7) | 44(2) |
| C(9)  | 1089(4) | 9197(5)  | 2471(7) | 51(2) |
| C(10) | 1421(4) | 9766(5)  | 2859(7) | 51(2) |
| C(11) | 1789(4) | 9876(5)  | 2420(7) | 47(2) |
| C(12) | 1825(3) | 9395(4)  | 1582(7) | 42(2) |
| C(13) | 1487(3) | 8808(4)  | 1206(7) | 40(2) |
| C(14) | 2232(3) | 9458(4)  | 1123(7) | 38(2) |
| C(15) | 2555(3) | 8794(4)  | 1226(7) | 41(2) |
| C(16) | 2623(4) | 8274(5)  | 2080(8) | 49(2) |
| C(17) | 2927(4) | 7665(6)  | 2207(8) | 57(3) |
| C(18) | 3185(4) | 7583(5)  | 1490(8) | 52(2) |
| C(19) | 3122(4) | 8081(5)  | 619(8)  | 54(2) |
| C(20) | 2809(3) | 8681(5)  | 486(8)  | 46(2) |
| C(21) | -412(4) | 8847(5)  | 373(10) | 57(3) |
| C(22) | 2164(3) | 11310(4) | 137(7)  | 38(2) |

---

**Table S8.** Bond lengths [ $\text{\AA}$ ] and angles [ $^\circ$ ] for Compound **10**.

---

|             |           |
|-------------|-----------|
| Br(1)-C(1)  | 1.897(9)  |
| Br(2)-C(18) | 1.885(9)  |
| S(1)-C(21)  | 1.681(9)  |
| S(2)-C(22)  | 1.687(8)  |
| N(1)-C(7)   | 1.287(13) |
| N(1)-N(2)   | 1.386(10) |
| N(2)-C(21)  | 1.332(12) |
| N(3)-C(21)  | 1.327(13) |
| N(4)-C(14)  | 1.280(10) |
| N(4)-N(5)   | 1.384(10) |
| N(5)-C(22)  | 1.351(10) |
| N(6)-C(22)  | 1.326(12) |
| C(1)-C(6)   | 1.372(14) |
| C(1)-C(2)   | 1.379(14) |

|             |           |
|-------------|-----------|
| C(2)-C(3)   | 1.381(14) |
| C(3)-C(4)   | 1.382(15) |
| C(4)-C(5)   | 1.380(13) |
| C(4)-C(7)   | 1.492(11) |
| C(5)-C(6)   | 1.386(13) |
| C(7)-C(8)   | 1.483(13) |
| C(8)-C(13)  | 1.387(12) |
| C(8)-C(9)   | 1.389(12) |
| C(9)-C(10)  | 1.361(14) |
| C(10)-C(11) | 1.380(14) |
| C(11)-C(12) | 1.396(12) |
| C(12)-C(13) | 1.391(12) |
| C(12)-C(14) | 1.493(13) |
| C(14)-C(15) | 1.481(12) |
| C(15)-C(16) | 1.384(12) |
| C(15)-C(20) | 1.398(13) |
| C(16)-C(17) | 1.366(13) |
| C(17)-C(18) | 1.373(14) |
| C(18)-C(19) | 1.376(13) |
| C(19)-C(20) | 1.367(13) |

|                 |           |
|-----------------|-----------|
| C(7)-N(1)-N(2)  | 118.8(8)  |
| C(21)-N(2)-N(1) | 118.9(8)  |
| C(14)-N(4)-N(5) | 117.7(7)  |
| C(22)-N(5)-N(4) | 117.3(7)  |
| C(6)-C(1)-C(2)  | 120.9(9)  |
| C(6)-C(1)-Br(1) | 118.9(7)  |
| C(2)-C(1)-Br(1) | 120.2(8)  |
| C(1)-C(2)-C(3)  | 119.7(10) |
| C(2)-C(3)-C(4)  | 120.5(10) |
| C(5)-C(4)-C(3)  | 118.6(8)  |
| C(5)-C(4)-C(7)  | 121.6(9)  |
| C(3)-C(4)-C(7)  | 119.7(9)  |
| C(4)-C(5)-C(6)  | 121.6(9)  |
| C(1)-C(6)-C(5)  | 118.6(9)  |
| N(1)-C(7)-C(8)  | 125.9(8)  |

|                   |          |
|-------------------|----------|
| N(1)-C(7)-C(4)    | 116.5(8) |
| C(8)-C(7)-C(4)    | 117.6(8) |
| C(13)-C(8)-C(9)   | 118.7(9) |
| C(13)-C(8)-C(7)   | 118.5(8) |
| C(9)-C(8)-C(7)    | 122.8(8) |
| C(10)-C(9)-C(8)   | 121.1(9) |
| C(9)-C(10)-C(11)  | 120.6(8) |
| C(10)-C(11)-C(12) | 119.8(9) |
| C(13)-C(12)-C(11) | 119.0(8) |
| C(13)-C(12)-C(14) | 118.7(7) |
| C(11)-C(12)-C(14) | 122.2(8) |
| C(8)-C(13)-C(12)  | 120.8(8) |
| N(4)-C(14)-C(15)  | 116.3(8) |
| N(4)-C(14)-C(12)  | 125.7(7) |
| C(15)-C(14)-C(12) | 118.0(7) |
| C(16)-C(15)-C(20) | 118.0(8) |
| C(16)-C(15)-C(14) | 120.5(8) |
| C(20)-C(15)-C(14) | 121.5(7) |
| C(17)-C(16)-C(15) | 121.7(9) |
| C(16)-C(17)-C(18) | 118.9(8) |
| C(17)-C(18)-C(19) | 121.2(8) |
| C(17)-C(18)-Br(2) | 118.1(7) |
| C(19)-C(18)-Br(2) | 120.7(7) |
| C(20)-C(19)-C(18) | 119.4(9) |
| C(19)-C(20)-C(15) | 120.8(8) |
| N(3)-C(21)-N(2)   | 116.1(8) |
| N(3)-C(21)-S(1)   | 122.8(8) |
| N(2)-C(21)-S(1)   | 121.1(7) |
| N(6)-C(22)-N(5)   | 117.3(7) |
| N(6)-C(22)-S(2)   | 123.2(6) |
| N(5)-C(22)-S(2)   | 119.5(6) |

---

Symmetry transformations used to generate equivalent atoms:

**Table S9.** Anisotropic displacement parameters ( $\text{\AA}^2 \times 10^3$ ) for Compound **10**. The anisotropic displacement factor exponent takes the form:  $-2\pi^2 [ h^2 a^{*2} U^{11} + \dots + 2 h k a^* b^* U^{12} ]$

|       | U <sup>11</sup> | U <sup>22</sup> | U <sup>33</sup> | U <sup>23</sup> | U <sup>13</sup> | U <sup>12</sup> |
|-------|-----------------|-----------------|-----------------|-----------------|-----------------|-----------------|
| Br(1) | 71(1)           | 38(1)           | 123(1)          | 6(1)            | 22(1)           | 21(1)           |
| Br(2) | 135(1)          | 56(1)           | 65(1)           | 14(1)           | 36(1)           | 52(1)           |
| S(1)  | 61(1)           | 40(1)           | 76(2)           | 26(1)           | 45(1)           | 20(1)           |
| S(2)  | 58(1)           | 28(1)           | 48(1)           | 7(1)            | 16(1)           | 2(1)            |
| N(1)  | 67(5)           | 32(4)           | 79(6)           | 14(4)           | 48(5)           | 11(3)           |
| N(2)  | 56(5)           | 32(4)           | 85(6)           | 22(4)           | 44(4)           | 12(3)           |
| N(3)  | 63(6)           | 35(5)           | 186(13)         | 23(6)           | 56(7)           | 14(4)           |
| N(4)  | 57(4)           | 29(4)           | 40(4)           | 3(3)            | 13(3)           | 5(3)            |
| N(5)  | 47(4)           | 27(3)           | 46(4)           | 5(3)            | 15(3)           | 1(3)            |
| N(6)  | 64(5)           | 27(3)           | 50(4)           | 6(3)            | 22(4)           | 4(3)            |
| C(1)  | 57(6)           | 36(5)           | 72(7)           | 5(5)            | 25(5)           | 14(4)           |
| C(2)  | 51(6)           | 38(5)           | 98(8)           | -6(5)           | 5(6)            | 7(4)            |
| C(3)  | 49(6)           | 43(5)           | 95(8)           | 4(5)            | 14(6)           | 11(4)           |
| C(4)  | 58(5)           | 33(4)           | 60(6)           | 13(4)           | 35(5)           | 11(4)           |
| C(5)  | 66(6)           | 37(5)           | 43(5)           | 6(4)            | 23(4)           | 12(4)           |
| C(6)  | 56(6)           | 48(5)           | 48(5)           | 12(4)           | 15(4)           | 17(5)           |
| C(7)  | 61(6)           | 34(4)           | 60(6)           | 12(4)           | 37(5)           | 14(4)           |
| C(8)  | 64(6)           | 28(4)           | 47(5)           | 15(4)           | 29(4)           | 15(4)           |
| C(9)  | 79(7)           | 40(5)           | 45(5)           | 15(4)           | 37(5)           | 28(5)           |
| C(10) | 83(7)           | 39(5)           | 35(4)           | 4(4)            | 27(5)           | 23(5)           |
| C(11) | 71(6)           | 33(4)           | 35(4)           | 4(3)            | 15(4)           | 12(4)           |
| C(12) | 63(5)           | 27(4)           | 36(4)           | 7(3)            | 15(4)           | 11(4)           |
| C(13) | 62(5)           | 25(4)           | 42(4)           | 5(3)            | 29(4)           | 10(4)           |
| C(14) | 47(5)           | 30(4)           | 34(4)           | 3(3)            | 11(4)           | 1(3)            |
| C(15) | 60(5)           | 23(4)           | 38(4)           | 4(3)            | 16(4)           | -3(4)           |
| C(16) | 71(6)           | 40(5)           | 40(5)           | 5(4)            | 26(4)           | 9(4)            |
| C(17) | 84(7)           | 41(5)           | 46(5)           | 14(4)           | 24(5)           | 13(5)           |
| C(18) | 79(6)           | 32(4)           | 43(5)           | 5(4)            | 20(5)           | 19(4)           |
| C(19) | 79(7)           | 38(5)           | 52(5)           | 7(4)            | 32(5)           | 16(5)           |
| C(20) | 63(6)           | 31(4)           | 47(5)           | 11(4)           | 23(4)           | 5(4)            |
| C(21) | 65(6)           | 41(5)           | 87(7)           | 23(5)           | 54(6)           | 14(4)           |
| C(22) | 49(5)           | 29(4)           | 33(4)           | -4(3)           | 12(4)           | -3(3)           |

X-Ray crystallographic data obtained for 1,3,5-trisbenzoylbenzene thiosemicarbazone (Compound **33**) has been deposited in the Cambridge Crystallographic Data Centre and was assigned the deposition number CDCC 1042568.



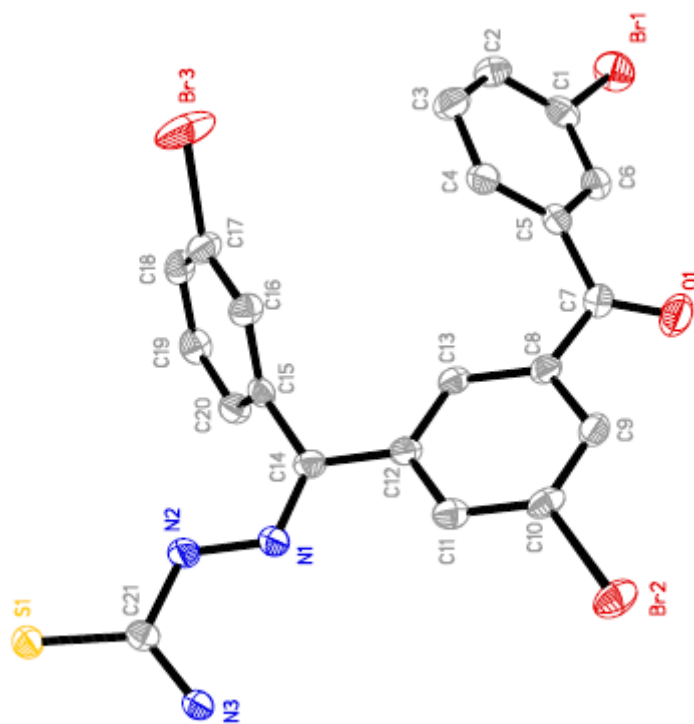

**Figure S9.** X-Ray Crystal Structure for Compound **33**

**Table S10.** Crystal data and structure refinement for Compound **33**.

|                        |                                                                    |                   |
|------------------------|--------------------------------------------------------------------|-------------------|
| Identification code    | KP68                                                               |                   |
| Empirical formula      | C <sub>21</sub> H <sub>14</sub> Br <sub>3</sub> N <sub>3</sub> O S |                   |
| Formula weight         | 596.14                                                             |                   |
| Temperature            | 150(2) K                                                           |                   |
| Wavelength             | 0.71073 Å                                                          |                   |
| Crystal system         | Triclinic                                                          |                   |
| Space group            | P -1                                                               |                   |
| Unit cell dimensions   | a = 9.8474(4) Å                                                    | α = 80.6333(12)°. |
|                        | b = 10.1192(4) Å                                                   | β = 86.6676(13)°. |
|                        | c = 10.9296(4) Å                                                   | γ = 85.3138(12)°. |
| Volume                 | 1069.88(7) Å <sup>3</sup>                                          |                   |
| Z                      | 2                                                                  |                   |
| Density (calculated)   | 1.851 Mg/m <sup>3</sup>                                            |                   |
| Absorption coefficient | 5.771 mm <sup>-1</sup>                                             |                   |
| F(000)                 | 580                                                                |                   |

|                                   |                                             |
|-----------------------------------|---------------------------------------------|
| Crystal size                      | 0.296 x 0.138 x 0.042 mm <sup>3</sup>       |
| Theta range for data collection   | 5.116 to 25.680°.                           |
| Index ranges                      | -12<=h<=12, -12<=k<=12, -13<=l<=13          |
| Reflections collected             | 23243                                       |
| Independent reflections           | 4027 [R(int) = 0.0316]                      |
| Completeness to theta = 25.242°   | 99.0 %                                      |
| Absorption correction             | Semi-empirical from equivalents             |
| Max. and min. transmission        | 0.543 and 0.191                             |
| Refinement method                 | Full-matrix least-squares on F <sup>2</sup> |
| Data / restraints / parameters    | 4027 / 0 / 262                              |
| Goodness-of-fit on F <sup>2</sup> | 1.052                                       |
| Final R indices [I>2sigma(I)]     | R1 = 0.0365, wR2 = 0.0867                   |
| R indices (all data)              | R1 = 0.0399, wR2 = 0.0892                   |
| Extinction coefficient            | n/a                                         |
| Largest diff. peak and hole       | 2.962 and -2.202 e.Å <sup>-3</sup>          |

**Table S11.** Atomic coordinates ( x 10<sup>4</sup>) and equivalent isotropic displacement parameters (Å<sup>2</sup>x 10<sup>3</sup>) for Compound **33**. U(eq) is defined as one third of the trace of the orthogonalized U<sup>ij</sup> tensor.

|       | x        | y       | z        | U(eq) |
|-------|----------|---------|----------|-------|
| Br(1) | 3858(1)  | 9655(1) | 3004(1)  | 42(1) |
| Br(2) | 5680(1)  | 1690(1) | 10380(1) | 32(1) |
| Br(3) | 11086(1) | 8541(1) | 6113(1)  | 55(1) |
| S(1)  | 11060(1) | 6522(1) | 13447(1) | 25(1) |
| O(1)  | 3957(3)  | 5319(3) | 6514(3)  | 44(1) |
| N(1)  | 8451(3)  | 5772(3) | 11165(3) | 24(1) |
| N(2)  | 9371(3)  | 6415(3) | 11705(3) | 26(1) |
| N(3)  | 8912(3)  | 5050(3) | 13530(3) | 26(1) |
| C(1)  | 5161(4)  | 8570(4) | 4017(3)  | 28(1) |
| C(2)  | 6533(4)  | 8766(4) | 3813(3)  | 31(1) |
| C(3)  | 7463(4)  | 7947(4) | 4553(4)  | 31(1) |
| C(4)  | 7021(4)  | 6957(4) | 5489(3)  | 25(1) |
| C(5)  | 5633(4)  | 6784(3) | 5691(3)  | 23(1) |
| C(6)  | 4694(4)  | 7589(4) | 4933(3)  | 27(1) |
| C(7)  | 5059(4)  | 5730(4) | 6654(3)  | 26(1) |

|       |         |         |          |       |
|-------|---------|---------|----------|-------|
| C(8)  | 5802(3) | 5182(3) | 7807(3)  | 22(1) |
| C(9)  | 5514(4) | 3902(4) | 8408(3)  | 24(1) |
| C(10) | 6117(4) | 3402(3) | 9515(3)  | 24(1) |
| C(11) | 6992(4) | 4122(3) | 10042(3) | 24(1) |
| C(12) | 7269(3) | 5414(3) | 9452(3)  | 22(1) |
| C(13) | 6667(3) | 5937(3) | 8328(3)  | 20(1) |
| C(14) | 8162(4) | 6223(3) | 10027(3) | 22(1) |
| C(15) | 8682(3) | 7481(3) | 9299(3)  | 21(1) |
| C(16) | 9534(4) | 7422(3) | 8249(3)  | 25(1) |
| C(17) | 9978(4) | 8609(4) | 7581(3)  | 28(1) |
| C(18) | 9598(4) | 9838(4) | 7928(3)  | 27(1) |
| C(19) | 8752(4) | 9887(4) | 8980(3)  | 28(1) |
| C(20) | 8296(4) | 8717(4) | 9670(3)  | 25(1) |
| C(21) | 9701(3) | 5937(3) | 12902(3) | 21(1) |

---

**Table S12.** Bond lengths [ $\text{\AA}$ ] and angles [ $^\circ$ ] for Compound **33**.

|             |          |
|-------------|----------|
| Br(1)-C(1)  | 1.902(4) |
| Br(2)-C(10) | 1.903(3) |
| Br(3)-C(17) | 1.895(4) |
| S(1)-C(21)  | 1.682(4) |
| O(1)-C(7)   | 1.220(4) |
| N(1)-C(14)  | 1.293(4) |
| N(1)-N(2)   | 1.369(4) |
| N(2)-C(21)  | 1.367(4) |
| N(3)-C(21)  | 1.316(5) |
| C(1)-C(6)   | 1.377(5) |
| C(1)-C(2)   | 1.382(6) |
| C(2)-C(3)   | 1.387(6) |
| C(3)-C(4)   | 1.388(5) |
| C(4)-C(5)   | 1.393(5) |
| C(5)-C(6)   | 1.397(5) |
| C(5)-C(7)   | 1.493(5) |
| C(7)-C(8)   | 1.498(5) |
| C(8)-C(13)  | 1.392(5) |

|             |          |
|-------------|----------|
| C(8)-C(9)   | 1.396(5) |
| C(9)-C(10)  | 1.381(5) |
| C(10)-C(11) | 1.380(5) |
| C(11)-C(12) | 1.400(5) |
| C(12)-C(13) | 1.402(5) |
| C(12)-C(14) | 1.479(5) |
| C(14)-C(15) | 1.498(5) |
| C(15)-C(16) | 1.389(5) |
| C(15)-C(20) | 1.393(5) |
| C(16)-C(17) | 1.389(5) |
| C(17)-C(18) | 1.376(5) |
| C(18)-C(19) | 1.385(5) |
| C(19)-C(20) | 1.389(5) |

|                   |          |
|-------------------|----------|
| C(14)-N(1)-N(2)   | 118.3(3) |
| C(21)-N(2)-N(1)   | 118.9(3) |
| C(6)-C(1)-C(2)    | 121.9(3) |
| C(6)-C(1)-Br(1)   | 118.1(3) |
| C(2)-C(1)-Br(1)   | 120.0(3) |
| C(1)-C(2)-C(3)    | 118.8(3) |
| C(2)-C(3)-C(4)    | 120.6(4) |
| C(3)-C(4)-C(5)    | 119.8(3) |
| C(4)-C(5)-C(6)    | 119.9(3) |
| C(4)-C(5)-C(7)    | 123.9(3) |
| C(6)-C(5)-C(7)    | 116.2(3) |
| C(1)-C(6)-C(5)    | 119.0(3) |
| O(1)-C(7)-C(5)    | 119.7(3) |
| O(1)-C(7)-C(8)    | 119.1(3) |
| C(5)-C(7)-C(8)    | 121.2(3) |
| C(13)-C(8)-C(9)   | 120.3(3) |
| C(13)-C(8)-C(7)   | 122.3(3) |
| C(9)-C(8)-C(7)    | 117.2(3) |
| C(10)-C(9)-C(8)   | 118.7(3) |
| C(11)-C(10)-C(9)  | 122.2(3) |
| C(11)-C(10)-Br(2) | 118.5(3) |
| C(9)-C(10)-Br(2)  | 119.2(3) |

|                   |          |
|-------------------|----------|
| C(10)-C(11)-C(12) | 119.4(3) |
| C(11)-C(12)-C(13) | 119.2(3) |
| C(11)-C(12)-C(14) | 120.2(3) |
| C(13)-C(12)-C(14) | 120.6(3) |
| C(8)-C(13)-C(12)  | 120.3(3) |
| N(1)-C(14)-C(12)  | 116.0(3) |
| N(1)-C(14)-C(15)  | 123.6(3) |
| C(12)-C(14)-C(15) | 120.4(3) |
| C(16)-C(15)-C(20) | 119.9(3) |
| C(16)-C(15)-C(14) | 120.2(3) |
| C(20)-C(15)-C(14) | 119.9(3) |
| C(15)-C(16)-C(17) | 118.8(3) |
| C(18)-C(17)-C(16) | 122.0(3) |
| C(18)-C(17)-Br(3) | 118.9(3) |
| C(16)-C(17)-Br(3) | 119.0(3) |
| C(17)-C(18)-C(19) | 118.7(3) |
| C(18)-C(19)-C(20) | 120.6(3) |
| C(19)-C(20)-C(15) | 119.9(3) |
| N(3)-C(21)-N(2)   | 116.2(3) |
| N(3)-C(21)-S(1)   | 125.7(3) |
| N(2)-C(21)-S(1)   | 118.1(3) |

---

Symmetry transformations used to generate equivalent atoms:

**Table S13.** Anisotropic displacement parameters ( $\text{\AA}^2 \times 10^3$ ) for Compound **33**. The anisotropic displacement factor exponent takes the form:  $-2\pi^2 [ h^2 a^{*2} U^{11} + \dots + 2 h k a^* b^* U^{12} ]$

|       | U <sup>11</sup> | U <sup>22</sup> | U <sup>33</sup> | U <sup>23</sup> | U <sup>13</sup> | U <sup>12</sup> |
|-------|-----------------|-----------------|-----------------|-----------------|-----------------|-----------------|
| Br(1) | 44(1)           | 41(1)           | 37(1)           | 7(1)            | -15(1)          | 2(1)            |
| Br(2) | 39(1)           | 18(1)           | 36(1)           | 1(1)            | 6(1)            | -7(1)           |
| Br(3) | 73(1)           | 35(1)           | 54(1)           | -8(1)           | 38(1)           | -18(1)          |
| S(1)  | 26(1)           | 25(1)           | 24(1)           | 0(1)            | -5(1)           | -6(1)           |
| O(1)  | 35(2)           | 51(2)           | 44(2)           | 11(1)           | -13(1)          | -21(1)          |
| N(1)  | 28(2)           | 25(2)           | 19(1)           | -1(1)           | -3(1)           | -7(1)           |

|       |       |       |       |       |       |        |
|-------|-------|-------|-------|-------|-------|--------|
| N(2)  | 34(2) | 25(2) | 20(1) | 3(1)  | -5(1) | -11(1) |
| N(3)  | 31(2) | 27(2) | 19(1) | 1(1)  | -6(1) | -10(1) |
| C(1)  | 34(2) | 29(2) | 22(2) | -2(1) | -7(2) | 1(2)   |
| C(2)  | 35(2) | 30(2) | 25(2) | 3(2)  | 2(2)  | -6(2)  |
| C(3)  | 26(2) | 36(2) | 29(2) | -1(2) | 5(2)  | -4(2)  |
| C(4)  | 24(2) | 29(2) | 22(2) | -4(1) | -1(1) | 0(1)   |
| C(5)  | 26(2) | 25(2) | 21(2) | -5(1) | -3(1) | -4(1)  |
| C(6)  | 24(2) | 32(2) | 25(2) | -6(2) | -4(1) | -4(2)  |
| C(7)  | 25(2) | 28(2) | 26(2) | -6(2) | -1(1) | -7(2)  |
| C(8)  | 21(2) | 25(2) | 21(2) | -3(1) | 4(1)  | -4(1)  |
| C(9)  | 23(2) | 25(2) | 26(2) | -6(1) | 3(1)  | -8(1)  |
| C(10) | 28(2) | 16(2) | 26(2) | -2(1) | 9(1)  | -4(1)  |
| C(11) | 28(2) | 22(2) | 21(2) | -2(1) | 2(1)  | -2(1)  |
| C(12) | 25(2) | 21(2) | 18(2) | -3(1) | 3(1)  | -4(1)  |
| C(13) | 23(2) | 18(2) | 19(2) | -1(1) | 3(1)  | -4(1)  |
| C(14) | 25(2) | 21(2) | 19(2) | 0(1)  | 0(1)  | -4(1)  |
| C(15) | 23(2) | 20(2) | 19(2) | 0(1)  | -7(1) | -3(1)  |
| C(16) | 30(2) | 18(2) | 27(2) | -3(1) | 1(1)  | -5(1)  |
| C(17) | 28(2) | 28(2) | 27(2) | -2(2) | 5(2)  | -7(2)  |
| C(18) | 29(2) | 20(2) | 31(2) | 2(1)  | -5(2) | -7(1)  |
| C(19) | 32(2) | 20(2) | 32(2) | -6(1) | -5(2) | -1(1)  |
| C(20) | 28(2) | 26(2) | 23(2) | -4(1) | -2(1) | -2(1)  |
| C(21) | 25(2) | 18(2) | 20(2) | -2(1) | -2(1) | 0(1)   |

---
